# Supplementary material for: Rhodium-Catalyzed Synthesis of 2,3-Disubstituted Indoles from β,β-Disubstituted Stryryl Azides
Source: PubMed Central journal article supplement (PMC3154515; doi:10.1002/anie.201006917), 2011-01-14

# Rh<sub>2</sub>(II)-Catalyzed Cascade Reactions that Selectively Synthesize 2,3-Disubstituted Indoles from $\beta,\beta$ -Disubstituted Styryl Azides.

Ke Sun, Sheng Liu, Patryk Bec, and Tom G. Driver\*

*Department of Chemistry, University of Illinois at Chicago  
845 West Taylor Street, Chicago, Illinois, 60607-7061*

## Supporting Information

### Contents:

|      |                                                                         |      |
|------|-------------------------------------------------------------------------|------|
| I.   | Preparation of Substrates using a Wittig Reaction.....                  | s-2  |
| II.  | Preparation of Substrates using a Horner–Wadsworth–Emmons Reaction..... | s-11 |
| III. | Preparation of Substrates using a Suzuki Reaction.....                  | s-14 |
| IV.  | Development of Rhodium-Catalyzed Migration Reaction.....                | s-21 |
| V.   | Mechanistic Experiments.....                                            | s-32 |
| VI.  | References.....                                                         | s-44 |
| V.   | Spectral Data.....                                                      | s-45 |

**General.** <sup>1</sup>H NMR and <sup>13</sup>C NMR spectra were recorded at ambient temperature using 500 MHz or 300 MHz spectrometers. The data are reported as follows: chemical shift in ppm from internal tetramethylsilane on the  $\delta$  scale, multiplicity (br = broad, s = singlet, d = doublet, t = triplet, q = quartet, m = multiplet), coupling constants (Hz) and integration. High resolution mass spectra were obtained by peak matching. Melting points are reported uncorrected. Infrared spectroscopy was obtained using a diamond attenuated total reflectance (ATR) accessory. Analytical thin layer chromatography was performed on 0.25 mm extra hard silica gel plates with UV254 fluorescent indicator. Liquid chromatography was performed using forced flow (flash chromatography) of the indicated solvent system on 60Å (40 – 60  $\mu$ m) mesh silica gel (SiO<sub>2</sub>). Medium pressure liquid chromatography (MPLC) was performed to force flow the indicated solvent system down columns that had been packed with 60Å (40 – 60  $\mu$ m) mesh silica gel (SiO<sub>2</sub>). All reactions were carried out under an atmosphere of nitrogen in glassware, which had been oven-dried. Unless otherwise noted, all reagents were commercially obtained and, where appropriate, purified prior to use. Acetonitrile, Methanol, Toluene, THF, Et<sub>2</sub>O, and CH<sub>2</sub>Cl<sub>2</sub> were dried by filtration through alumina according to the procedure of Grubbs.<sup>1</sup> Metal salts were stored in a nitrogen atmosphere dry box.

## I. Preparation of Substrates using Wittig Reaction.

### A. Routes to Substrates

The styryl azides investigated in this study were synthesized by one three different routes (Scheme s1). The majority of the substrates were formed in two steps from commercially available *ortho*-nitro-substituted benzaldehydes starting by a nucleophilic aromatic substitution using  $\text{NaN}_3$ , followed by a Wittig reaction. Alternatively the styryl azides were constructed from phosphonate **s3** using a Horner–Wadworth–Emmons reaction of phosphonate **s3**, followed by an iron-mediated reduction to form aniline **s4**. Azidation then provided the required styryl azide. Finally styryl azides, **14b** and **14c**, were accessed from boronic acid **s5** and the corresponding vinyl triflate **s6**.

Scheme s1. Routes to Styryl Azides.

#### I. Wittig Reaction Route

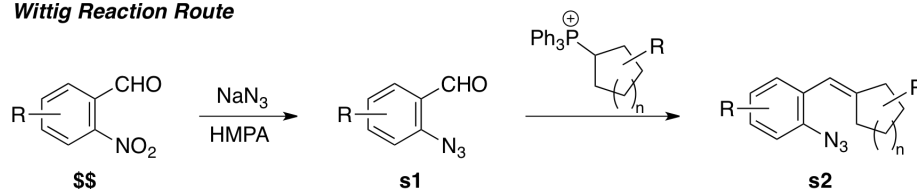

#### II. Horner–Wadsworth–Emmons Route

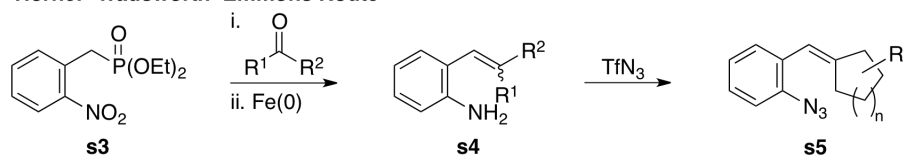

#### III. Suzuki Route

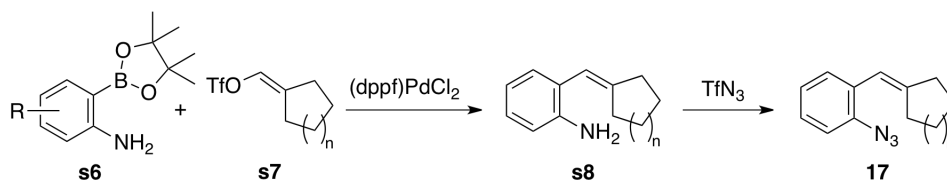

### B. General Procedure for the Nucleophilic Substitution of 2-Nitrobenzaldehydes.

Following the procedure of Driver and co-workers,<sup>2</sup> the 2-azidobenzaldehydes were prepared. Yields were not optimized.

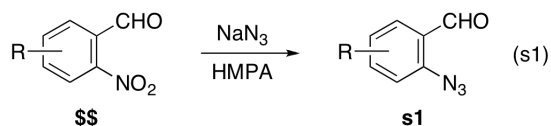

To a dry, stir bar-equipped scintillation vial were added 0.453 g of 2-nitro-benzaldehyde (3.0 mmol), 0.585 g of  $\text{NaN}_3$  (9.0 mmol), and 9.0 mL of HMPA. The reaction was stirred overnight at room temperature, then was taken up in diethyl ether (100 mL) and washed with water ( $5 \times 50$  mL). The organic layer was dried over  $\text{Na}_2\text{SO}_4$  and filtered. The filtrate was concentrated *in vacuo*. Purification with MPLC afford the 2-azido-benzaldehyde.

### C. Synthesis of 2-Azidobenzaldehydes.

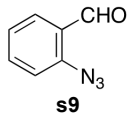

**Benzaldehyde s9.**<sup>2</sup> The general procedure was followed using 2.10 g of 2-nitrobenzaldehyde (13.9 mmol) and 2.92 g of  $\text{NaN}_3$  (45.0 mmol, 3.3 eq) in 40 mL of HMPA. Purification by MPLC (1:100 EtOAc: hexanes) afforded the product as a light yellow solid (1.70 g, 83%); mp 33 - 36 °C; The spectral data matched that reported by Driver and co-workers:  $^1\text{H}$  NMR (500 MHz,  $\text{CDCl}_3$ ) 10.25 (s, 1H), 7.79 (dd,  $J = 1.5$  Hz, 7.5 Hz, 1H), 7.54 (dt,  $J = 1.5$  Hz, 8.0 Hz, 1H) 7.14 - 7.19 (m, 2H);  $^{13}\text{C}$  NMR (125 MHz,  $\text{CDCl}_3$ )  $\delta$  188.4 (CH), 142.8 (C), 135.4 (CH), 128.9 (CH), 126.9 (C), 124.8 (C), 119.1 (CH); IR (thin film): 2971, 2121, 1690, 1594, 1477, 1290, 1274  $\text{cm}^{-1}$ .

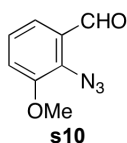

**Benzaldehyde s10.** The general procedure was followed using 1.81 g of 2-nitro-3-methoxybenzaldehyde (10 mmol) and 1.31 g of  $\text{NaN}_3$  (20 mmol) in 50 mL of HMPA at 50 °C. Purification of the reaction mixture using MPLC (1:30 EtOAc:hexanes) afforded the product as a white solid (1.61 g, 91%); mp 54 - 56 °C;  $^1\text{H}$  NMR (500 MHz;  $\text{CDCl}_3$ )  $\delta$  10.15 (s, 1H), 7.82 (d,  $J = 8.5$  Hz, 1H), 6.72 (dd,  $J = 2.5$  Hz, 8.5 Hz, 1H), 6.67 (d,  $J = 2.5$  Hz, 1H), 3.88 (s, 3H);  $^{13}\text{C}$  NMR (125 MHz,  $\text{CDCl}_3$ )  $\delta$  187.2 (CH), 165.3 (C), 144.9 (C), 131.1 (CH), 121.0 (C), 111.1 (CH), 103.9 (CH), 55.8 ( $\text{CH}_3$ ); IR (thin film): 2359, 2341, 2110, 1723, 1264, 730, 703  $\text{cm}^{-1}$ . HRMS (EI)  $m/z$  calcd for  $\text{C}_8\text{H}_7\text{O}_2\text{N}_3$  ( $\text{M}$ )<sup>+</sup> 177.05383, found 177.05529.

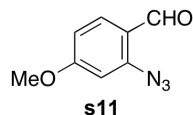

**Benzaldehyde s11.** The general procedure was followed using 1.81 g of 2-nitro-4-methoxybenzaldehyde (10 mmol) and 1.31 g of  $\text{NaN}_3$  (20 mmol) in 50 mL of HMPA at 50 °C. Purification of the reaction mixture using MPLC (1:30 EtOAc: hexanes) afforded the product as a white solid (1.62 g, 92%); mp 73 - 75 °C;  $^1\text{H}$  NMR (500 MHz;  $\text{CDCl}_3$ )  $\delta$  10.17 (s, 1H), 7.84 (d,  $J = 9.0$  Hz, 1H), 6.74 (dd,  $J = 2.5$  Hz, 9.0 Hz, 1H), 6.68 (d,  $J = 2.5$  Hz, 1H), 3.90 (s, 3H);  $^{13}\text{C}$  NMR (125 MHz,  $\text{CDCl}_3$ )  $\delta$  187.2 (CH), 165.3 (C), 144.9 (C), 131.1 (CH), 121.1 (C), 111.1 (CH), 104.0 (CH), 55.8 ( $\text{CH}_3$ ); IR (thin film): 3457, 3015, 2970, 2116, 1744, 1367, 1229, 750, 528  $\text{cm}^{-1}$ . HRMS (EI)  $m/z$  calcd for  $\text{C}_8\text{H}_7\text{O}_2\text{N}_3$  ( $\text{M}$ )<sup>+</sup> 177.05383, found 177.05520.

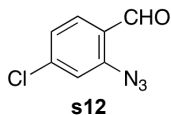

**Benzaldehyde s12.** The general procedure was followed using 1.85 g of 2-nitro-4-chlorobenzaldehyde (10 mmol) and 0.98 g of  $\text{NaN}_3$  (15 mmol) in 50 mL of HMPA. Purification of the reaction mixture using MPLC (1:100 EtOAc:hexanes) afforded the product as a white solid (1.45 g, 80%); mp 91 - 93 °C;  $^1\text{H}$  NMR (500 MHz;  $\text{CDCl}_3$ )  $\delta$  10.28 (s, 1H), 7.82 (d,  $J = 8.5$  Hz, 1H), 7.26 (d,  $J = 2.0$  Hz, 1H), 7.21 (dd,  $J = 1.5$  Hz, 8.5 Hz, 1H);  $^{13}\text{C}$  NMR (125 MHz,  $\text{CDCl}_3$ )  $\delta$  187.4 (CH), 144.0 (C), 141.7 (C), 130.2 (CH), 125.6 (CH), 125.4 (C),

119.2 (CH); IR (thin film): 3455, 3016, 2969, 2123, 1739, 1366, 1216, 750, 528  $\text{cm}^{-1}$ . HRMS (EI)  $m/z$  calcd for  $\text{C}_7\text{H}_4\text{ON}_3\text{Cl}$  (M)<sup>+</sup> 183.00134, found 183.00217.

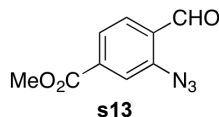

**Benzaldehyde s13.** The general procedure was followed using 2.09 g of methyl 4-formyl-3-nitrobenzoate (10 mmol) and 1.31 g of  $\text{NaN}_3$  (20 mmol) in 50 mL of HMPA. Purification of the reaction mixture using MPLC (1:30 EtOAc: hexanes) afforded the product as a white solid (1.95 g, 95 %); mp 112 – 114 °C;  $^1\text{H}$  NMR (500 MHz;  $\text{CDCl}_3$ )  $\delta$  10.38 (s, 1H), 7.94 – 7.92 (m, 2H), 7.85 – 7.83 (m, 1H), 3.97 (s, 3H);  $^{13}\text{C}$  NMR (125 MHz,  $\text{CDCl}_3$ )  $\delta$  188.1 (CH), 165.3 (C), 143.1 (C), 136.2 (C), 129.4 (C), 129.1 (CH), 125.6 (CH), 120.3 (C), 52.8 ( $\text{CH}_3$ ); IR (thin film): 3458, 3015, 2970, 2122, 1738, 1366, 1216, 762, 527  $\text{cm}^{-1}$ . HRMS (EI)  $m/z$  calcd for  $\text{C}_9\text{H}_7\text{O}_3\text{N}_3$  (M)<sup>+</sup> 205.04875, found 205.04990.

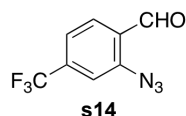

**Benzaldehyde s14.**<sup>3</sup> The general procedure was followed using 2.69 g of 2-nitro-4-trifluoromethylbenzaldehyde (12.3 mmol) and 2.21 g of  $\text{NaN}_3$  (34.0 mmol) in 50 mL of HMPA. Purification by MPLC (1:100 EtOAc: hexanes) afforded the product as a yellow solid (2.49 g, 94%); mp 89 -91 °C; The spectral data matched that reported by Driver and co-workers:<sup>2</sup>  $^1\text{H}$  NMR (500 MHz,  $\text{CDCl}_3$ ) 10.38 (s, 1H), 8.00 (d,  $J = 8.0$  Hz, 1H), 7.50 (s, 1H) 7.48 (d,  $J = 8.0$  Hz, 1H);  $^{13}\text{C}$  NMR (125 MHz,  $\text{CDCl}_3$ ):  $\delta$  187.5 (CH), 143.5 (C), 136.8 (q,  $J_{\text{CF}} = 31.4$  Hz, C), 129.8 (CH), 126.1 (C), 122.9 (q,  $J_{\text{CF}} = 270.9$  Hz, C), 121.6 (q,  $J_{\text{CF}} = 3.5$  Hz, CH) 116.3 (q,  $J_{\text{CF}} = 36.3$  Hz, CH);  $^{19}\text{F}$  NMR ( $\text{CDCl}_3$ , 282 MHz)  $\delta$  -61.10; IR (thin film): 2980, 2901, 2122, 1689, 1414, 1392, 1328, 1072, 750  $\text{cm}^{-1}$ .

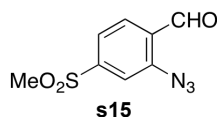

**Benzaldehyde s15.** The general procedure was followed using 2.29 g of 4-(methylsulfonyl)-2-nitrobenzaldehyde (10 mmol) and 1.31 g of  $\text{NaN}_3$  (20 mmol) in 50 mL of HMPA. Purification of the reaction mixture using MPLC (1:10 EtOAc: hexanes) afforded the product as a white solid (1.96 g, 87%); mp 125 – 127 °C;  $^1\text{H}$  NMR (500 MHz;  $\text{CDCl}_3$ )  $\delta$  10.40 (s, 1H), 8.05 (d,  $J = 8.0$  Hz, 1H), 7.85 (s, 1H), 7.5 (d,  $J = 8.0$  Hz, 1H), 3.12 (s, 3H);  $^{13}\text{C}$  NMR (125 MHz,  $\text{CDCl}_3$ )  $\delta$  187.3 (CH), 146.5 (C), 144.1 (C), 130.3 (CH), 129.8 (C), 132.3 (CH), 118.4 (CH), 44.2 ( $\text{CH}_3$ ); IR (thin film): 3023, 2925, 2852, 2115, 1681, 1398, 1279, 1159, 1135  $\text{cm}^{-1}$ .

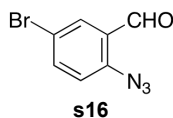

**Benzaldehyde s16.**<sup>4</sup> The general procedure was followed using 2.03 g of 2-nitro-5-bromobenzaldehyde (10 mmol) and 1.3 g of  $\text{NaN}_3$  (20 mmol) in 40 mL of DMSO at 50 °C. Purification of the reaction mixture using MPLC (1:100 EtOAc:hexanes) afforded the product as a white solid (2.19 g, 97%); mp 94 – 96 °C;  $^1\text{H}$  NMR (500 MHz;  $\text{CDCl}_3$ )  $\delta$  10.27 (s, 1H), 7.98 (d,  $J = 2.5$  Hz, 1H), 7.70 (dd,  $J = 2.5$  Hz, 8.5 Hz, 1H), 7.16 (d,  $J = 8.5$  Hz, 1H);  $^{13}\text{C}$  NMR (125 MHz,  $\text{CDCl}_3$ )  $\delta$  187.1 (CH), 141.9 (C), 138.0 (CH), 131.7 (CH), 128.0 (C), 120.8



(CH), 118.3 (C); IR (thin film): 3457, 3005, 2970, 2130, 1725, 1368, 1214, 750, 527  $\text{cm}^{-1}$ . HRMS (EI)  $m/z$  calcd for  $\text{C}_7\text{H}_4\text{ON}_3\text{Br}$  ( $\text{M}^+$ ) 224.95377, found 224.95459.

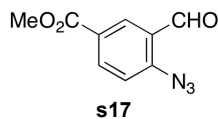

**Benzaldehyde s17.** The general procedure was followed using 2.09 g of methyl 3-formyl-4-nitrobenzoate (10 mmol) and 1.31 g of  $\text{NaN}_3$  (20 mmol) in 50 mL of HMPA. Purification of the reaction mixture using MPLC (1:30 EtOAc:hexanes) afforded the product as a white solid (1.97 g, 96%); mp 118–110  $^\circ\text{C}$ ;  $^1\text{H}$  NMR (500 MHz;  $\text{CDCl}_3$ )  $\delta$  10.31 (s, 1H), 8.49 (d,  $J = 2.0$  Hz, 1H), 8.23 (dd,  $J = 2.0$  Hz, 8.5 Hz, 1H), 7.31 (d,  $J = 8.5$  Hz, 1H), 3.97 (s, 3H);  $^{13}\text{C}$  NMR (125 MHz,  $\text{CDCl}_3$ )  $\delta$  187.7 (CH), 165.4 (C), 146.8 (C), 136.0 (CH), 130.8 (CH), 127.0 (C), 127.6 (C), 119.2 (CH), 52.4 ( $\text{CH}_3$ ); IR (thin film): 3458, 3015, 2970, 2122, 1738, 1366, 1216, 762, 527  $\text{cm}^{-1}$ . HRMS (EI)  $m/z$  calcd for  $\text{C}_9\text{H}_7\text{O}_3\text{N}_3$  ( $\text{M}^+$ ) 205.04875, found 205.04980.

#### D. General Procedure for the Phosphonium Salt Synthesis.

Unless otherwise noted, the phosphonium salt was synthesized from the corresponding cycloketone. Yields were not optimized.

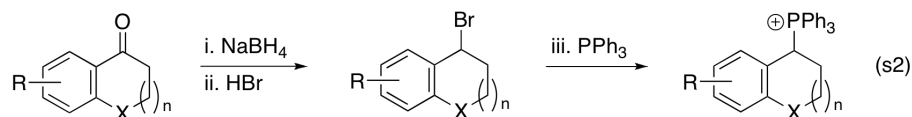

To a solution of 2.92 g of  $\alpha$ -tetralone (20 mmol) in 30 mL of EtOH was added 1.52 g of  $\text{NaBH}_4$  (40 mmol). The mixture was monitored by thin layer chromatography. Once the starting material spot had disappeared, the mixture was concentrated *in vacuo*, and the resulting material was diluted with 50 mL of water. The resulting aqueous mixture was extracted with dichloromethane ( $3 \times 10$  mL). The organic phase (containing the alcohol) was treated with proportional HBr. The progress of the reaction was monitored by thin layer chromatography. Once the alcohol completely consumed, the mixture was diluted with 100 mL of water, then extracted with dichloromethane ( $3 \times 20$  mL). The resulting organic phase was dried over  $\text{Na}_2\text{SO}_4$ . The mixture was filtered and the filtrate was concentrated *in vacuo* to afford bromide. To a solution of the bromide in 60 mL of PhMe was added 5.76 g of  $\text{PPh}_3$ . The reaction mixture was heated to reflux. After 16h, the mixture was cooled down to room temperature, then filtrated. The solid was washed with diethyl ether ( $3 \times 30$  mL), and dried under high vacuum to afford phosphonium salt.

#### E. General Procedure for the Wittig Reaction of 2-Azidobenzaldehydes.

Following the procedure of Scott and co-workers,<sup>5</sup> the 2-azidobenzaldehydes were prepared. Yields were not optimized.

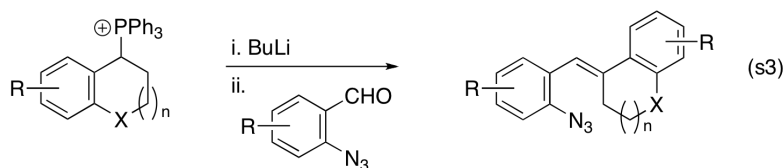

To a solution of 4.0 mmol of the phosphonium salt in 12 mL of THF at  $-78$   $^\circ\text{C}$ , was added 1.6 mL of *n*-BuLi (2.5 M in hexanes, 4.0 mmol) dropwise. After stirring 1h at  $-78$   $^\circ\text{C}$ , the mixture was warmed to room

temperature and stirred additional one hour. Then 0.647 g of 2-azidobenzaldehyde (4.4 mmol) was added and the mixture was stirred for 1 h at ambient temperature. The resulting mixture was diluted with 15 mL of water and extracted with CH<sub>2</sub>Cl<sub>2</sub> (3 × 10 mL). The resulting organic phase was washed with 20 mL of brine and dried over Na<sub>2</sub>SO<sub>4</sub>. After filtration, the filtrate was concentrated in *vacuo*. Purification of the reaction mixture using MPLC afforded the product.

### E. Synthesis of Styryl Azides.

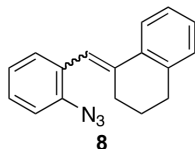

**Styryl Azide 8.** The general procedure was followed using 1.94 g of 2-azidobenzaldehyde **s9** (13.2 mmol), 6.85 g of the phosphonium salt (14.5 mmol), 5.8 mL of a 2.5 M solution of BuLi in hexanes in 50 mL of THF. Purification by MPLC (pure hexanes) afforded the product as a white powder, as an 84:16 mixture of *E*- and *Z*-isomers (2.24 g, 65%);  $R_f = 0.45$  (18:82 EtOAc: hexane). Selected spectral data for the major (*E*) isomer: <sup>1</sup>H NMR (500 MHz, CDCl<sub>3</sub>) δ 7.80 - 7.99 (m, 1H), 7.33 - 7.37 (m, 2H), 7.13 - 7.26 (m, 5H), 7.07 (s, 1H), 2.91 (t, *J* = 6.5 Hz, 2H), 2.71 (t, *J* = 6.0 Hz, 2H), 1.87 - 1.92 (m, 2H); <sup>13</sup>C NMR (125 MHz, CDCl<sub>3</sub>) δ 138.7 (C), 138.6 (C), 137.9 (C), 135.9 (C), 130.9 (CH), 130.1 (C), 129.2 (CH), 128.1 (CH), 127.6 (CH), 126.2 (CH), 124.7 (CH), 124.3 (CH), 118.7 (CH), 118.4 (CH); 30.4 (CH<sub>2</sub>), 28.2 (CH<sub>2</sub>), 23.8 (CH<sub>2</sub>); Selected spectral data for the minor (*Z*) isomer: <sup>1</sup>H NMR (500 MHz, CDCl<sub>3</sub>) δ 7.13 - 7.26 (m, 5H), 7.07 - 7.08 (m, 1H), 6.95 - 6.98 (m, 1H), 6.85 - 6.88 (m, 1H), 6.47 (s, 1H), 2.95 (t, *J* = 6.5 Hz, 2H), 2.63 (t, *J* = 6.5 Hz, 2H), 2.05 - 2.10 (m, 2H); <sup>13</sup>C NMR (125 MHz, CDCl<sub>3</sub>) δ 139.8 (C), 138.7 (C), 138.0 (C), 134.7 (C), 131.3 (CH), 130.1 (C), 128.9 (CH), 128.0 (CH), 127.6 (CH), 124.7 (CH), 124.5 (CH), 119.9 (CH), 118.5 (CH), 35.0 (CH<sub>2</sub>), 29.7 (CH<sub>2</sub>), 24.2 (CH<sub>2</sub>); Selected spectral data for the mixture: δ IR (thin film): 2117, 2083, 1486, 1445, 756, 745 cm<sup>-1</sup>. HRMS (EI) *m/z* calcd for C<sub>17</sub>H<sub>15</sub>N<sub>3</sub> (*M* - N<sub>2</sub>)<sup>+</sup> 261.12660, found 261.12679.

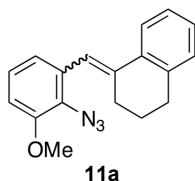

**Styryl Azide 11a.** The general procedure was followed using 0.58 g of 2-azido-3-methoxybenzaldehyde **s10** (3.3 mmol), 1.42 g of the phosphonium salt (3.0 mmol), 1.2 mL of a 2.5 M solution of BuLi in hexanes in 25 mL of THF. Purification by MPLC (1:50 EtOAc:hexanes) afforded the product as a white powder, as a 76:24 mixture of *E*- and *Z*-isomers (0.63 g, 72%). Selected spectral data for the major (*E*) isomer: <sup>1</sup>H NMR (500 MHz, CDCl<sub>3</sub>) δ 7.76 - 7.74 (m, 1H), 7.23 - 7.21 (m, 2H), 7.14 - 7.04 (m, 3H), 6.93 - 6.90 (m, 1H), 6.84 - 6.82 (m, 1H), 3.93 (s, 3H), 2.88 (t, *J* = 6.5 Hz, 2H), 2.66 (dt, *J* = 1.5 Hz, 6.0 Hz, 2H), 1.86 (pent, *J* = 6.5 Hz, 2H); <sup>13</sup>C NMR (125 MHz, CDCl<sub>3</sub>) δ 153.9 (C), 138.5 (C), 137.8 (C), 135.9 (C), 131.8 (C), 129.2 (CH), 127.6 (CH), 126.9 (C), 126.2 (CH), 124.6 (CH), 124.6 (CH), 122.8 (CH), 119.4 (CH), 110.2 (CH), 56.1 (CH<sub>3</sub>), 30.3 (CH<sub>2</sub>), 28.2 (CH<sub>2</sub>), 23.7 (CH<sub>2</sub>); Selected spectral data for the minor (*Z*) isomer: <sup>1</sup>H NMR (500 MHz, CDCl<sub>3</sub>) δ 7.27 - 7.25 (m, 1H), 7.14 - 7.04 (m, 3H), 6.88 - 6.85 (m, 1H), 6.75 - 6.71 (m, 2H), 6.41 (s, 1H), 3.91 (s, 3H), 2.92 (t, *J* = 6.5 Hz, 2H), 2.60 (dt, *J* = 1.5 Hz, 6.0 Hz, 2H), 2.04 (pent, *J* = 6.5 Hz, 2H); <sup>13</sup>C NMR (125 MHz, CDCl<sub>3</sub>) δ 153.9 (C), 139.5 (C), 138.8 (C), 134.8 (C), 132.5 (C), 129.0 (CH), 128.8 (CH), 127.5 (CH), 125.7 (CH), 125.0 (C), 124.8 (CH), 123.1 (CH), 120.5 (CH), 109.9 (CH), 56.0 (CH<sub>3</sub>), 34.9 (CH<sub>2</sub>), 29.7 (CH<sub>2</sub>), 24.2 (CH<sub>2</sub>); Selected

spectral data for the mixture:  $\delta$  IR (thin film): 2933, 2103, 1756, 1450, 1262, 1087, 737  $\text{cm}^{-1}$ . HRMS (EI)  $m/z$  calcd for  $\text{C}_{18}\text{H}_{17}\text{ON}$  ( $\text{M}-\text{N}_2$ )<sup>+</sup> 263.13102, found 163.132000.

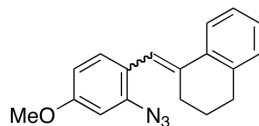

11b

**Styryl Azide 11b.** The general procedure was followed using 0.58 g of 2-azido-4-methoxybenzaldehyde **s11** (3.3 mmol), 1.42 g of the phosphonium salt (3.0 mmol), 1.2 mL of a 2.5 M solution of BuLi in hexanes in 25 mL of THF. Purification by MPLC (1:50 EtOAc: hexanes) afforded the product as a white powder, as an 83:17 mixture of *E*- and *Z*-isomers (0.37 g, 43%). Selected spectral data for the major (*E*) isomer: <sup>1</sup>H NMR (500 MHz,  $\text{CDCl}_3$ )  $\delta$  7.74 – 7.72 (m, 1H), 7.26 (d,  $J = 8.5$  Hz, 1H), 7.23 – 7.19 (m, 2H), 7.14 – 7.12 (m, 1H), 6.97 (s, 1H), 6.74 – 6.71 (m, 2H), 3.87 (s, 3H), 2.87 (t,  $J = 6.5$  Hz, 2H), 2.67 (dt,  $J = 1.5$  Hz, 6.0 Hz, 2H), 1.87 (pent,  $J = 6.5$  Hz, 2H); <sup>13</sup>C NMR (125 MHz,  $\text{CDCl}_3$ )  $\delta$  159.5 (C), 139.6 (C), 137.7 (C), 137.5 (C), 136.1 (C), 131.7 (CH), 129.1 (CH), 127.4 (CH), 126.2 (CH), 124.5 (CH), 122.8 (C), 118.3 (CH), 110.0 (CH), 104.2 (CH), 55.5 ( $\text{CH}_3$ ), 30.3 ( $\text{CH}_2$ ), 28.1 ( $\text{CH}_2$ ), 23.7 ( $\text{CH}_2$ ); Selected spectral data for the minor (*Z*) isomer: <sup>1</sup>H NMR (500 MHz,  $\text{CDCl}_3$ )  $\delta$  7.23 – 7.19 (m, 1H), 7.10 – 7.05 (m, 3H), 6.86 (t,  $J = 6.5$  Hz, 1H), 6.69 (d,  $J = 2.5$  Hz, 1H), 6.51 (dd,  $J = 2.5$  Hz, 8.5 Hz, 1H), 6.33 (s, 1H), 3.83 (s, 3H), 2.91 (t,  $J = 6.5$  Hz, 2H), 2.57 (dt,  $J = 1.5$  Hz, 6.0 Hz, 2H), 2.03 (pent,  $J = 6.5$  Hz, 2H); <sup>13</sup>C NMR (125 MHz,  $\text{CDCl}_3$ )  $\delta$  159.5 (C), 138.7 (C), 134.9 (C), 132.7 (C), 132.0 (CH), 128.9 (CH), 128.7 (CH), 128.6 (CH), 128.5 (C), 124.7 (CH), 123.1 (C), 119.4 (CH), 110.6 (CH), 104.0 (CH), 55.4 ( $\text{CH}_3$ ), 34.9 ( $\text{CH}_2$ ), 29.7 ( $\text{CH}_2$ ), 24.2 ( $\text{CH}_2$ ); Selected spectral data for the mixture:  $\delta$  IR (thin film): 2935, 2101, 1753, 1436, 1266, 1084, 739  $\text{cm}^{-1}$ . HRMS (EI)  $m/z$  calcd for  $\text{C}_{18}\text{H}_{17}\text{ON}_3$  ( $\text{M}$ )<sup>+</sup> 291.13717, found 291.13649.

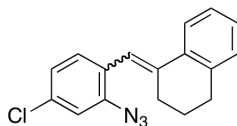

11c

**Styryl Azide 11c.** The general procedure was followed using 0.60 g of 2-azido-4-chlorobenzaldehyde **s12** (3.3 mmol), 1.42 g of the phosphonium salt (3.0 mmol), 1.2 mL of a 2.5 M solution of BuLi in hexanes in 25 mL of THF. Purification by MPLC (1:100 EtOAc: hexanes) afforded the product as a white powder, as an 82:18 mixture of *E*- and *Z*-isomers (0.49 g, 55%). Selected spectral data for the major (*E*) isomer: <sup>1</sup>H NMR (500 MHz,  $\text{CDCl}_3$ )  $\delta$  7.71 – 7.70 (m, 1H), 7.26 – 7.20 (m, 3H), 7.16 (d,  $J = 2.0$  Hz, 1H), 7.13 – 7.12 (m, 2H), 6.91 (s, 1H), 2.86 (t,  $J = 6.5$  Hz, 2H), 2.62 (dt,  $J = 1.5$  Hz, 6.5 Hz, 2H), 1.85 (pent,  $J = 6.5$  Hz, 2H); <sup>13</sup>C NMR (125 MHz,  $\text{CDCl}_3$ )  $\delta$  139.8 (C), 139.3 (C), 137.9 (C), 135.6 (C), 133.3 (C), 131.8 (CH), 129.2 (CH), 128.6 (C), 127.8 (CH), 126.3 (CH), 124.6 (CH), 124.6 (CH), 118.6 (CH), 117.6 (CH), 30.3 ( $\text{CH}_2$ ), 28.2 ( $\text{CH}_2$ ), 23.7 ( $\text{CH}_2$ ); Selected spectral data for the minor (*Z*) isomer: <sup>1</sup>H NMR (500 MHz,  $\text{CDCl}_3$ )  $\delta$  7.23 – 7.19 (m, 1H), 7.11 – 7.09 (m, 1H), 7.04 (d,  $J = 8.0$  Hz, 1H), 6.98 (d,  $J = 8.0$  Hz, 1H), 6.88 (dd,  $J = 2.0$  Hz, 8.5 Hz, 1H), 6.84 (t,  $J = 6.0$  Hz, 1H), 6.27 (s, 1H), 2.89 (t,  $J = 6.5$  Hz, 2H), 2.56 (dt,  $J = 1.5$  Hz, 6.5 Hz, 2H), 2.03 (pent,  $J = 6.5$  Hz, 2H); <sup>13</sup>C NMR (125 MHz,  $\text{CDCl}_3$ )  $\delta$  140.6 (C), 139.2 (C), 139.0 (C), 134.4 (C), 133.2 (C), 132.3 (CH), 129.1 (C), 129.0 (CH), 128.8 (CH), 124.8 (CH), 124.8 (CH), 124.6 (CH), 118.7 (CH), 118.6 (CH), 34.9 ( $\text{CH}_2$ ), 29.7 ( $\text{CH}_2$ ), 24.1 ( $\text{CH}_2$ ); Selected spectral data for the mixture:  $\delta$  IR (thin film): 2931, 2109, 1738, 1486, 1286, 756  $\text{cm}^{-1}$ . HRMS (EI)  $m/z$  calcd for  $\text{C}_{17}\text{H}_{14}\text{N}_3\text{Cl}$  ( $\text{M}$ )<sup>+</sup> 295.08762, found 295.08889.

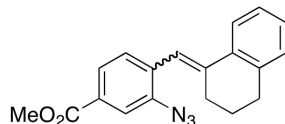

11d

**Styryl Azide 11d.** The general procedure was followed using 0.68 g of methyl 3-azido-4-formylbenzoate **s13** (3.3 mmol), 1.42 g of the phosphonium salt (3.0 mmol), 1.2 mL of a 2.5 M solution of BuLi in hexanes in 25 mL of THF. Purification by MPLC (1:50 EtOAc: hexanes) afforded the product as a white powder, as an 83:17 mixture of *E*- and *Z*-isomers (0.39 g, 41%). Selected spectral data for the major (*E*) isomer:  $^1\text{H NMR}$  (500 MHz,  $\text{CDCl}_3$ )  $\delta$  7.85 (d,  $J = 1.5$  Hz, 1H), 7.80 (dd,  $J = 1.5$  Hz, 8.0 Hz, 1H), 7.73 (dd,  $J = 3.5$  Hz, 5.5 Hz, 1H), 7.39 (d,  $J = 3.0$  Hz, 1H), 7.22 (dd,  $J = 3.5$  Hz, 5.5 Hz, 2H), 7.14 – 7.12 (m, 1H), 7.00 (s, 1H), 3.95 (s, 3H), 2.87 (t,  $J = 6.5$  Hz, 2H), 2.67 (dt,  $J = 1.5$  Hz, 6.5 Hz, 2H), 1.86 (pent,  $J = 6.5$  Hz, 2H);  $^{13}\text{C NMR}$  (125 MHz,  $\text{CDCl}_3$ )  $\delta$  166.2 (C), 140.4 (C), 139.1 (C), 138.1 (C), 135.5 (C), 134.6 (C), 130.7 (CH), 129.6 (C), 129.2 (CH), 128.0 (CH), 126.3 (CH), 125.4 (CH), 124.7 (CH), 119.4 (CH), 117.9 (CH), 52.4 ( $\text{CH}_3$ ), 30.2 ( $\text{CH}_2$ ), 28.3 ( $\text{CH}_2$ ), 23.7 ( $\text{CH}_2$ ); Selected spectral data for the minor (*Z*) isomer:  $^1\text{H NMR}$  (500 MHz,  $\text{CDCl}_3$ )  $\delta$  7.82 (d,  $J = 1.5$  Hz, 1H), 7.55 (dd,  $J = 3.0$  Hz, 8.0 Hz, 1H), 7.23 – 7.18 (m, 1H), 7.14 – 7.12 (m, 2H), 6.94 (d,  $J = 8.5$  Hz, 1H), 6.80 (t,  $J = 8.5$  Hz, 1H), 6.35 (s, 1H), 3.92 (s, 3H), 2.90 (t,  $J = 6.5$  Hz, 2H), 2.59 (dt,  $J = 1.5$  Hz, 6.5 Hz, 2H), 2.03 (pent,  $J = 6.5$  Hz, 2H);  $^{13}\text{C NMR}$  (125 MHz,  $\text{CDCl}_3$ )  $\delta$  166.2 (C), 141.1 (C), 139.0 (C), 138.3 (C), 135.5 (C), 134.2 (C), 131.2 (CH), 129.2 (CH), 129.0 (CH), 128.8 (CH), 128.8 (C), 125.4 (CH), 124.8 (CH), 119.6 (CH), 119.0 (CH), 52.3 ( $\text{CH}_3$ ), 34.9 ( $\text{CH}_2$ ), 29.6 ( $\text{CH}_2$ ), 24.0 ( $\text{CH}_2$ ); Selected spectral data for the mixture:  $\delta$  IR (thin film): 3456, 3015, 2970, 2116, 1739, 1436, 1367, 1228, 1092, 748, 527  $\text{cm}^{-1}$ . HRMS (EI)  $m/z$  calcd for  $\text{C}_{19}\text{H}_{17}\text{O}_2\text{N}_3$  ( $\text{M}$ ) $^+$  319.13208, found 319.13140.

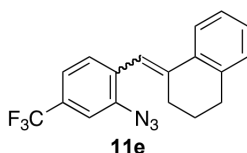

11e

**Styryl Azide 11e.** The general procedure was followed using 0.95 g of 2-azidobenzaldehyde **s14** (4.4 mmol), 1.89 g of the phosphonium salt (4.0 mmol), 1.8 mL of a 2.5 M solution of BuLi in hexanes in 20 mL of THF. Purification by MPLC (1:100 EtOAc: hexanes) afforded the product as a light yellow powder, as a 87:13 mixture of *E*- and *Z*-isomers (1.81 g, 81%). Selected spectral data for the major (*E*) isomer:  $^1\text{H NMR}$  (500 MHz,  $\text{CDCl}_3$ )  $\delta$  7.75 – 7.77 (m, 1H), 7.40 – 7.46 (m, 3H), 7.24 – 7.28 (m, 2H), 7.14 – 7.18 (m, 1H), 7.02 (s, 1H), 2.91 (m,  $J = 6.5$  Hz, 2H), 2.67 – 2.69 (m, 2H), 1.89 (pent,  $J = 6.5$  Hz, 2H);  $^{13}\text{C NMR}$  (125 MHz,  $\text{CDCl}_3$ )  $\delta$  140.5 (C), 139.4 (C), 133.6 (C), 131.3 (CH), 130.1 (q,  $J_{CF} = 32.6$  Hz, C), 129.3 (CH), 129.0 (C), 128.1 (CH), 126.3 (CH), 124.7 (CH), 123.8 (q,  $J_{CF} = 270.8$  Hz, C), 121.0 (q,  $J_{CF} = 3.5$  Hz, CH), 117.4 (CH), 115.3 (q,  $J_{CF} = 3.8$  Hz, CH), 30.2 ( $\text{CH}_2$ ), 28.2 ( $\text{CH}_2$ ), 23.7 ( $\text{CH}_2$ ) one overlapping aromatic carbon signal; Selected spectral data for the minor (*Z*) isomer:  $^1\text{H NMR}$  (500 MHz,  $\text{CDCl}_3$ )  $\delta$  7.40 – 7.46 (m, 1H), 7.24 – 7.28 (m, 1H), 7.14 – 7.18 (m, 3H), 6.99 (d,  $J = 8.0$  Hz, 1H), 6.86 – 6.89 (m, 1H), 6.37 (s, 1H), 2.95 (t,  $J = 6.5$  Hz, 2H), 2.62 – 2.64 (m, 2H), 2.01 (pent,  $J = 6.5$  Hz, 2H);  $^{13}\text{C NMR}$  (125 MHz,  $\text{CDCl}_3$ )  $\delta$  141.9 (C), 139.1 (C), 138.8 (C), 134.3 (C), 134.1 (C), 138.1 (CH), 135.3 (CH), 131.8 (CH), 129.0 (CH), 128.8 (CH), 124.9 (CH), 118.5 (CH), 115.5 (q,  $J_{CF} = 3.8$  Hz, CH), 34.9 ( $\text{CH}_2$ ), 29.6 ( $\text{CH}_2$ ), 24.0 ( $\text{CH}_2$ );  $^{19}\text{F NMR}$  ( $\text{CDCl}_3$ , 282 MHz)  $\delta$  –63.12; Selected spectral data for the mixture: IR (thin film): 2111, 1739, 1328, 1273, 1123, 913, 745  $\text{cm}^{-1}$ . HRMS (EI)  $m/z$  calcd for  $\text{C}_{18}\text{H}_{14}\text{N}_3\text{F}_3$  ( $\text{M}$ ) $^+$  329.11398, found 329.11303.

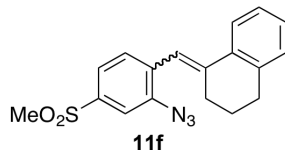

**Styryl Azide 11f.** The general procedure was followed using 0.74 g of 2-azido-4-(methylsulfonyl)benzaldehyde **s15** (3.3 mmol), 1.42 g of the phosphonium salt (3.0 mmol), 1.2 mL of a 2.5 M solution of BuLi in hexanes in 25 mL of THF. Purification by MPLC (1:20 EtOAc: hexanes) afforded the product as a white powder as one isomer (0.47 g, 46%):  $^1\text{H}$  NMR (500 MHz,  $\text{CDCl}_3$ )  $\delta$  7.73 (d,  $J = 1.5$  Hz, 2H), 7.68 (dd,  $J = 1.5$  Hz, 8.0 Hz, 1H), 7.50 (d,  $J = 8.0$  Hz, 1H), 7.25 – 7.22 (m, 2H), 7.15 – 7.13 (m, 1H), 6.98 (s, 1H), 3.11 (s, 3H), 2.88 (t,  $J = 6.5$  Hz, 2H), 2.66 (dt,  $J = 1.5$  Hz, 6.5 Hz, 2H), 1.87 (pent,  $J = 6.5$  Hz, 2H);  $^{13}\text{C}$  NMR (125 MHz,  $\text{CDCl}_3$ )  $\delta$  141.5 (C), 140.1 (C), 139.7 (C), 138.2 (C), 135.5 (C), 135.1 (C), 131.7 (CH), 129.3 (CH), 128.3 (CH), 126.3 (CH), 124.7 (CH), 123.0 (CH), 117.2 (CH), 117.1 (CH), 44.6 ( $\text{CH}_3$ ), 30.1 ( $\text{CH}_2$ ), 28.3 ( $\text{CH}_2$ ), 23.7 ( $\text{CH}_2$ ); IR (thin film): 3454, 3026, 2969, 2116, 1738, 1366, 1206, 738, 536  $\text{cm}^{-1}$ . HRMS (EI)  $m/z$  calcd for  $\text{C}_{18}\text{H}_{17}\text{O}_2\text{NS}$  ( $\text{M}-\text{N}_2$ ) $^+$  311.09800, found 311.09698.

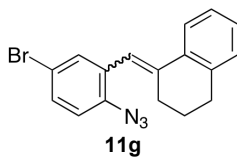

**Styryl Azide 11g.** The general procedure was followed using 0.75 g of 2-azido-5-bromobenzaldehyde **s16** (3.3 mmol), 1.42 g of the phosphonium salt (3.0 mmol), 1.2 mL of a 2.5 M solution of BuLi in hexanes in 25 mL of THF. Purification by MPLC (1:100 EtOAc: hexanes) afforded the product as a white powder, as an 83:17 mixture of *E*- and *Z*-isomers (0.62 g, 61%). Selected spectral data for the major (*E*) isomer:  $^1\text{H}$  NMR (500 MHz,  $\text{CDCl}_3$ )  $\delta$  7.73 – 7.71 (m, 1H), 7.45 (d,  $J = 2.5$  Hz, 1H), 7.42 (dd,  $J = 2.5$  Hz, 8.5 Hz, 1H), 7.25 – 7.21 (m, 2H), 7.17 – 7.14 (m, 1H), 7.05 (d,  $J = 8.5$  Hz, 1H), 6.92 (s, 1H), 2.88 (t,  $J = 6.5$  Hz, 2H), 2.66 (dt,  $J = 1.5$  Hz, 6.5 Hz, 2H), 1.87 (pent,  $J = 6.5$  Hz, 2H);  $^{13}\text{C}$  NMR (125 MHz,  $\text{CDCl}_3$ )  $\delta$  139.9 (C), 138.0 (C), 137.8 (C), 135.4 (C), 133.4 (CH), 131.9 (C), 130.7 (CH), 129.2 (CH), 128.0 (C), 127.9 (CH), 126.2 (CH), 124.8 (CH), 120.0 (CH), 117.4 (CH), 30.3 ( $\text{CH}_2$ ), 28.1 ( $\text{CH}_2$ ), 23.7 ( $\text{CH}_2$ ); Selected spectral data for the minor (*Z*) isomer:  $^1\text{H}$  NMR (500 MHz,  $\text{CDCl}_3$ )  $\delta$  7.34 (dd,  $J = 2.0$  Hz, 8.5 Hz, 1H), 7.27 (d,  $J = 2.0$  Hz, 1H), 7.17 – 7.14 (m, 2H), 7.01 (d,  $J = 8.0$  Hz, 2H), 6.90 – 6.87 (m, 1H), 6.28 (s, 1H), 2.92 (t,  $J = 6.5$  Hz, 2H), 2.59 (dt,  $J = 1.5$  Hz, 6.5 Hz, 2H), 2.04 (pent,  $J = 6.5$  Hz, 2H);  $^{13}\text{C}$  NMR (125 MHz,  $\text{CDCl}_3$ )  $\delta$  141.1 (C), 138.9 (C), 137.2 (C), 134.0 (C), 133.7 (CH), 132.6 (C), 129.0 (CH), 128.6 (CH), 128.0 (C), 124.8 (CH), 124.8 (CH), 120.1 (CH), 118.3 (CH), 117.2 (CH), 35.0 ( $\text{CH}_2$ ), 29.7 ( $\text{CH}_2$ ), 24.1 ( $\text{CH}_2$ ); Selected spectral data for the mixture:  $\delta$  IR (thin film): 3457, 3015, 2970, 2122, 1755, 1369, 1215, 747, 516  $\text{cm}^{-1}$ ; HRMS (EI)  $m/z$  calcd for  $\text{C}_{17}\text{H}_{14}\text{N}_3\text{Br}$  ( $\text{M}$ ) $^+$  339.03710, found 339.03776.

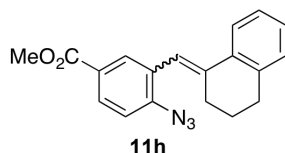

**Styryl Azide 11h.** The general procedure was followed using 0.68 g of methyl 3-azido-4-formylbenzoate **s17** (3.3 mmol), 1.42 g of the phosphonium salt (3.0 mmol), 1.2 mL of a 2.5 M solution of BuLi in hexanes in 25 mL of THF. Purification by MPLC (1:50 EtOAc: hexanes) afforded the product as a white powder, as an 87:13 mixture of *E*- and *Z*-isomers (0.38 g, 40%). Selected spectral data for the major (*E*) isomer:  $^1\text{H}$  NMR (500 MHz,

CDCl<sub>3</sub>) δ 8.03 (d, *J* = 1.5 Hz, 1H), 7.98 (dd, *J* = 1.5 Hz, 8.0 Hz, 1H), 7.74 (dd, *J* = 3.5 Hz, 5.5 Hz, 1H), 7.23 – 7.20 (m, 3H), 7.15 – 7.14 (m, 1H), 6.98 (s, 1H), 3.94 (s, 3H), 2.87 (t, *J* = 6.5 Hz, 2H), 2.69 (dt, *J* = 1.5 Hz, 6.5 Hz, 2H), 1.86 (pent, *J* = 6.5 Hz, 2H); <sup>13</sup>C NMR (125 MHz, CDCl<sub>3</sub>) δ 166.5 (C), 143.2 (C), 139.6 (C), 138.0 (C), 135.6 (C), 132.2 (CH), 129.9 (C), 129.3 (CH), 129.2 (CH), 127.8 (CH), 126.2 (CH), 126.1 (C), 124.6 (CH), 118.2 (CH), 117.7 (CH), 52.1 (CH<sub>3</sub>), 30.3 (CH<sub>2</sub>), 28.2 (CH<sub>2</sub>), 23.7 (CH<sub>2</sub>); Selected spectral data for the minor (*Z*) isomer: <sup>1</sup>H NMR (500 MHz, CDCl<sub>3</sub>) δ 7.92 (dd, *J* = 3.0, 8.5 Hz, 1H), 7.83 (d, *J* = 3.0 Hz, 1H), 7.23 – 7.20 (m, 1H), 7.13 – 7.10 (m, 1H), 6.95 (d, *J* = 8.5 Hz, 1H), 6.80 (t, *J* = 6.5 Hz, 1H), 6.33 (s, 1H), 3.82 (s, 3H), 2.92 (t, *J* = 6.5 Hz, 2H), 2.60 (dt, *J* = 1.5 Hz, 6.5 Hz, 2H), 2.05 (pent, *J* = 6.5 Hz, 2H); <sup>13</sup>C NMR (125 MHz, CDCl<sub>3</sub>) δ 166.3 (C), 142.6 (C), 140.9 (C), 138.9 (C), 135.5 (C), 134.2 (C), 132.7 (CH), 130.8 (CH), 129.0 (CH), 128.4 (CH), 126.4 (CH), 126.1 (C), 124.8 (CH), 118.7 (CH), 118.4 (CH), 52.0 (CH<sub>3</sub>), 35.0 (CH<sub>2</sub>), 29.7 (CH<sub>2</sub>), 24.1 (CH<sub>2</sub>); Selected spectral data for the mixture: δ IR (thin film): 3024, 2969, 2121, 1753, 1372, 1292, 762, 528 cm<sup>-1</sup>. HRMS (EI) *m/z* calcd for C<sub>19</sub>H<sub>17</sub>ON (M)<sup>+</sup> 291.12593, found 291.12443.

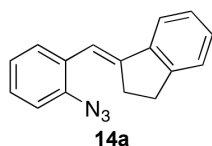

**Styryl Azide 14a.** The general procedure was followed using 0.92 g of 2-azidobenzaldehyde **s9** (6.54 mmol), 2.40 g of the phosphonium salt (5.24 mmol), 2.3 mL of a 2.5 M solution of BuLi in hexanes in 15 mL of THF. Purification by MPLC (1:100 EtOAc: hexanes) afforded the product as a light yellow powder, as an 82:18 mixture of *E*- and *Z*-isomers (0.24 g, 19%): R<sub>f</sub> = 0.45 (18:82 EtOAc: hexane). Selected spectral data for the major (*E*) isomer: <sup>1</sup>H NMR (500 MHz, CDCl<sub>3</sub>) δ 7.65 – 7.67 (m, 1H), 7.54 (dd, *J* = 1.5 Hz, 7.5 Hz, 1H), 7.10 – 7.35 (m, 7H), 3.00 – 3.08 (m, 4H); <sup>13</sup>C NMR (125 MHz, CDCl<sub>3</sub>) δ 146.0 (C), 145.6 (C), 142.4 (C), 137.8 (C), 130.0 (C), 128.9 (CH), 128.5 (CH), 127.6 (CH), 126.8 (CH), 125.3 (CH), 124.5 (CH), 120.7 (CH), 118.4 (CH), 113.4 (CH), 30.8 (CH<sub>2</sub>), 30.7 (CH<sub>2</sub>); Selected spectral data for the minor (*Z*) isomer: <sup>1</sup>H NMR (500 MHz, CDCl<sub>3</sub>) δ 7.43 (d, *J* = 8.0 Hz, 1H), 7.10 – 7.35 (m, 5H), 7.04 (d, *J* = 8.0 Hz, 1H), 6.92 – 6.95 (m, 1H), 6.47 (s, 1H), 3.00 – 3.08 (m, 2H), 2.94 – 2.97 (m, 2H); <sup>13</sup>C NMR (125 MHz, CDCl<sub>3</sub>) δ 149.0 (C), 145.0 (C), 139.4 (C), 138.0 (C), 130.8 (CH), 130.1 (C), 129.0 (CH), 128.5 (CH), 125.9 (CH), 125.4 (CH), 124.7 (CH), 124.2 (CH), 118.7 (CH), 116.8 (CH), 33.9 (CH<sub>2</sub>), 30.2 (CH<sub>2</sub>); Selected spectral data for the mixture: IR (thin film): 2117, 2084, 1570, 1483, 1277, 1264, 749 cm<sup>-1</sup>. HRMS (EI) *m/z* calcd for C<sub>16</sub>H<sub>13</sub>N<sub>3</sub> (M)<sup>+</sup> 247.11095, found 247.11013.

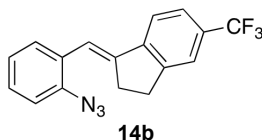

**Styryl Azide 14b.** The general procedure was followed using 0.76 g of 2-azidobenzaldehyde **s9** (5.18 mmol), 2.48 g of the phosphonium salt (4.70 mmol), 2.1 mL of a 2.5 M solution of BuLi in hexanes in 15 mL of THF. Purification by MPLC (1:100 EtOAc: hexanes) afforded the product as a light yellow oil, as a 72:28 mixture of *E*- and *Z*-isomers (0.52 g, 35%): R<sub>f</sub> = 0.45 (18:82 EtOAc: hexane). Selected spectral data for the major (*E*) isomer: <sup>1</sup>H NMR (500 MHz, CDCl<sub>3</sub>) δ 7.81 (d, *J* = 7.5 Hz, 1H), 7.51 – 7.54 (m, 2H), 7.30 – 7.39 (m, 2H), 7.11 – 7.23 (m, 3H), 3.18 – 3.24 (m, 2H), 3.05 – 3.08 (m, 2H); <sup>13</sup>C NMR (125 MHz, CDCl<sub>3</sub>) δ 144.3 (C), 143.7 (C), 143.5 (C), 143.3 (C), 138.0 (C), 129.4 (C), 128.9 (CH), 128.1 (CH), 127.1 (CH), 125.1 (q, *J*<sub>CF</sub> = 4.0 Hz, CH), 124.6 (CH), 124.2 (q, *J*<sub>CF</sub> = 271.9, C), 123.9 (CH), 118.4 (CH), 115.0 (CH), 30.4 (CH<sub>2</sub>), 29.6 (CH<sub>2</sub>); Selected spectral data for the minor (*Z*) isomer: <sup>1</sup>H NMR (500 MHz, CDCl<sub>3</sub>) δ 7.43 (d, *J* = 7.5 Hz, 1H), 7.30 – 7.39 (m,

2H), 7.11 – 7.23 (m, 2H), 7.13 (dd,  $J = 0.5$  Hz, 7.5 Hz, 1H), 7.05 (t,  $J = 7.5$  Hz, 1H), 6.57 (s, 1H), 3.18 – 3.24 (m, 2H), 2.99 – 3.30 (m, 2H);  $^{13}\text{C}$  NMR (125 MHz,  $\text{CDCl}_3$ )  $\delta$  146.5 (C), 141.3 (C), 138.1 (C), 130.5 (CH), 129.5 (C), 128.8 (CH), 127.5 (C), 127.4 (CH), 127.2 (C), 126.3 (CH), 125.1 (q,  $J_{CF} = 4.0$  Hz, CH), 124.8 (CH), 118.8 (CH), 118.5 (CH), 33.5 ( $\text{CH}_2$ ), 28.8 ( $\text{CH}_2$ );  $^{19}\text{F}$  NMR ( $\text{CDCl}_3$ , 282 MHz)  $\delta$  -63.12; Selected spectral data for the mixture: IR (thin film): 2124, 2083, 1595, 1318, 1160, 1118, 750  $\text{cm}^{-1}$ . HRMS (EI)  $m/z$  calcd for  $\text{C}_{17}\text{H}_{12}\text{N}_3\text{F}_3$  (M) $^+$  315.09833, found 315.09885.

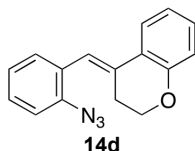

**Styryl Azide 14d.** The general procedure was followed using 0.65 g of 2-azidobenzaldehyde **s9** (4.42 mmol), 1.87 g of the phosphonium salt (3.95 mmol), 1.73 mL of a 2.5 M solution of BuLi in hexanes in 20 mL of THF. Purification by MPLC (1:100 EtOAc: hexanes) afforded the product as a white powder, as an 83:17 mixture of *E*- and *Z*-isomers (0.28 g, 27%):  $R_f = 0.45$  (18:82 EtOAc: hexane). Selected spectral data for the major (*E*) isomer:  $^1\text{H}$  NMR (500 MHz,  $\text{CDCl}_3$ )  $\delta$  7.70 (dd,  $J = 1.5$  Hz, 8.0 Hz, 1H), 7.32 – 7.35 (m, 1H), 7.27 (d,  $J = 8.0$  Hz, 1H), 7.19 – 7.22 (m, 2H), 7.14 – 7.17 (m, 1H), 7.08 (s, 1H), 6.95 – 6.98 (m, 1H), 6.83 – 6.85 (m, 1H), 4.20 (t,  $J = 6.0$  Hz, 2H), 2.80 – 2.83 (m, 2H);  $^{13}\text{C}$  NMR (125 MHz,  $\text{CDCl}_3$ )  $\delta$  154.9 (C), 138.7 (C), 132.1 (C), 130.9 (CH), 129.5 (CH), 128.8 (C), 128.3 (CH), 124.8 (CH), 124.3 (CH), 122.4 (C), 120.9 (CH), 118.4 (CH), 117.5 (CH), 117.0 (CH), 66.2 ( $\text{CH}_2$ ), 26.9 ( $\text{CH}_2$ ); Selected spectral data for the minor (*Z*) isomer:  $^1\text{H}$  NMR (500 MHz,  $\text{CDCl}_3$ ):  $\delta$  7.38 (d,  $J = 7.5$  Hz, 1H), 7.29 – 7.30 (m, 1H), 7.09 – 7.11 (m, 1H), 7.00 – 7.04 (m, 2H), 6.84 (dd,  $J = 1.0$  Hz, 8.0 Hz, 1H), 6.65 – 6.58 (m, 1H), 6.29 (s, 1H), 4.38 (t, 5.5 Hz, 2H), 2.71- 2.73 (m, 2H);  $^{13}\text{C}$  NMR (125 MHz,  $\text{CDCl}_3$ ) 154.9 (C) 138.1 (C), 132.5 (C), 131.1 (CH), 129.7 (CH), 128.53 (CH), 128.50 (CH), 124.7 (CH), 120.6 (C), 120.0 (CH), 119.3 (CH), 118.6 (CH), 117.1 (CH), 67.4 ( $\text{CH}_2$ ), 33.3 ( $\text{CH}_2$ ); Selected spectral data for the mixture:  $\delta$  IR (thin film): 2117, 2091, 1603, 1572, 1468, 1450, 1281, 1049, 749  $\text{cm}^{-1}$ . HRMS (EI)  $m/z$  calcd for  $\text{C}_{16}\text{H}_{13}\text{ON}_3$  (M) $^+$  263.10587, found 263.10672.

## II. Preparation of Substrates using a Horner–Wadsworth–Emmons Reaction.

### A. General Procedure for the Horner–Wadsworth–Emmons Reaction and Fe-Mediated Nitro-Group Reduction

2-Amino substituted styrenes were synthesized via a two-step procedure of Horner-Wadsworth-Emmons reaction followed by nitro-group reduction. Yields were not optimized.

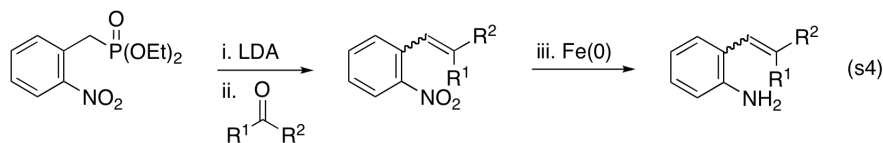

To a  $-78$  °C solution of LDA (4.4 mmol) in 10 mL of THF was added dropwise *ortho*-nitrobenzylphosphonate in 3 mL of THF. After an additional hour, a solution of the ketone in 5 mL of THF was added slowly to the mixture at  $-78$  °C. The reaction mixture was allowed to warm to ambient temperature slowly. After 1h, 10 mL water was added to quench the reaction. The resulting mixture was taken up by dichloromethane and separated. The aqueous phase was washed with  $3 \times 5$  mL dichloromethane. The resulting organic phase was washed with

20 mL of brine and dried over Na<sub>2</sub>SO<sub>4</sub>. After filtration, the filtrate was concentrated *in vacuo* to produce 2-nitrostyrene, which was submitted to the subsequent Fe-mediated nitro-group reduction without further purification.

To a solution of nitro-substituted styrene (prepared from 4.0 mmol of *ortho*-nitrobenzylphosphonate) in 20 mL of AcOH and 20 mL of EtOH was added 1.8 g of Fe powder (32 mmol). The resultant mixture was allowed to reflux at 80 °C overnight. After cooled down to ambient temperature, the resulting mixture was filtrated with a pad of Celite. The filtrate was diluted with 50 mL of water and washed with 3 × 10 mL dichloromethane. The resulting organic phase was washed with 40 mL of brine and dried over Na<sub>2</sub>SO<sub>4</sub>. After filtration, the filtrate was concentrated *in vacuo*. Purification of the reaction mixture using MPLC afforded the product

## B. Synthesis of *ortho*-Amino-Substituted Styrenes.

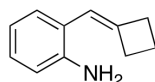

s18

**Styrene s18.** The general procedure of Horner–Wadsworth–Emmons reaction was followed using 1.09 g of *ortho*-nitrobenzylphosphonate<sup>6</sup> (4.0 mmol), 0.45 mL of cyclobutanone (6.0 mmol) and LDA (4.4 mmol) in 6 mL of THF. After work-up, the representative pathway of nitro-group reduction was followed by using 1.79 g of Fe (32.0 mmol), in 20.0 mL of AcOH and 20.0 mL of EtOH. Purification by MPLC (1:100 – 20:80 EtOAc: hexanes) afforded the product as a light yellow oil (0.25 g, 39% two steps): <sup>1</sup>H NMR (500 MHz, CDCl<sub>3</sub>) δ 7.16 – 7.19 (m, 1H), 7.07 – 7.11 (m, 1H), 6.72 (d, *J* = 8.0 Hz, 1H), 6.79 – 6.83 (m, 1H), 6.11 (s, 1H), 3.71 (s, 2H), 2.92 – 2.99 (m, 4H), 2.10 – 2.16 (m, 2H); <sup>13</sup>C NMR (125 MHz, CDCl<sub>3</sub>) δ 145.2 (C), 143.5 (C), 128.2 (CH), 127.3 (CH), 123.4 (C), 118.5 (CH), 115.8 (CH), 115.7 (CH), 32.6 (CH<sub>2</sub>), 32.3 (CH<sub>2</sub>), 18.2 (CH<sub>2</sub>); IR (thin film): 3451, 3366, 2948, 1614, 1488 1297, 1263, 744cm<sup>-1</sup>. HRMS (EI) *m/z* calcd for C<sub>11</sub>H<sub>13</sub>N (M)<sup>+</sup> 159.10480, found 159.10560.

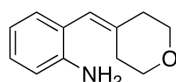

s19

**Styrene s19.** The general procedure of Horner–Wadsworth–Emmons reaction was followed using 1.09 g of *ortho*-nitrobenzylphosphonate<sup>6</sup> (4.0 mmol), 0.55 mL of tetrahydro-4*H*-pyran-4-one (6.0 mmol) and LDA (4.4 mmol) in 6 mL of THF. After work-up, the representative pathway of nitro-group reduction was followed by using 1.79 g of Fe (32.0 mmol), in 20.0 mL of AcOH and 20.0 mL of EtOH. Purification by MPLC (1:100 – 20:80 EtOAc: hexanes) afforded the product as a light yellow oil (0.50 g, 66% two steps): <sup>1</sup>H NMR (500 MHz, CDCl<sub>3</sub>) 7.07 (t, *J* = 8.0 Hz, 1H), 6.99 (d, *J* = 7.5 Hz, 1H), 6.69 – 6.75 (m, 2H), 6.14 (s, 1H), 3.80 (t, *J* = 5.5 Hz, 2H), 3.69 (s, 2H), 3.66 (t, *J* = 5.5 Hz, 2H), 2.43 (t, *J* = 5.5 Hz, 2H), 2.36 (t, *J* = 5.5 Hz, 2H); <sup>13</sup>C NMR (125 MHz, CDCl<sub>3</sub>) δ 144.2 (C), 139.8 (C), 130.1 (CH), 127.9 (CH), 122.9 (C), 119.6 (CH), 118.1 (CH), 115.1 (CH), 69.7 (CH<sub>2</sub>), 69.0 (CH<sub>2</sub>), 37.0 (CH<sub>2</sub>), 31.0 (CH<sub>2</sub>); IR (thin film): 3459, 3355, 1613, 1489, 1452, 1229, 1093, 995, 746 cm<sup>-1</sup>. HRMS (EI) *m/z* calcd for C<sub>12</sub>H<sub>15</sub>ON (M)<sup>+</sup> 189.11537, found 189.11613.



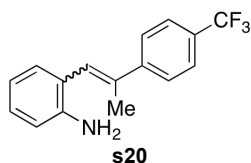

**Styrene s20.** The general procedure of Horner–Wadsworth–Emmons reaction was followed using 1.09 g of *ortho*-nitrobenzylphosphonate<sup>6</sup> (4.0 mmol), 0.83 g of 4-acetylbenzotrifluoride (4.4 mmol) and LDA (4.4 mmol) in 6 mL of THF. After work-up, the representative pathway of nitro-group reduction was followed by using 1.79 g of Fe (32.0 mmol), in 20.0 mL of AcOH and 20.0 mL of EtOH. Purification by MPLC (1:100 – 20:80 EtOAc: hexanes) afforded the crude product as a brown oil (0.34 g, 31% two steps). The aniline was carried on to the azidation reaction without further purification.

### C. General Procedure for the Azidation Reaction.

Following the procedure of Tor and co-workers,<sup>7</sup> the aniline group was transformed into an azide (s5). Yields were not optimized.

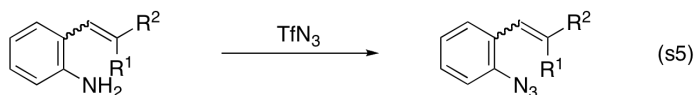

To a solution of aniline (3 mmol) in 5 mL of CH<sub>2</sub>Cl<sub>2</sub> was added subsequently 24 mg of CuSO<sub>4</sub>, 1.2 mL of Et<sub>3</sub>N, freshly prepared triflyl azide (9 mmol) in 15 mL of CH<sub>2</sub>Cl<sub>2</sub>, 1 mL of water and 2 mL of MeOH. The resulting mixture was allowed to react at room temperature overnight. Then, the reaction mixture was taken up by 15 mL dichloromethane, neutralized with a saturated aq. soln. of NaHCO<sub>3</sub> and washed with 3 × 10 mL of CH<sub>2</sub>Cl<sub>2</sub>. The resulting organic phase was washed with 20 mL of brine and dried over Na<sub>2</sub>SO<sub>4</sub>. After filtration, the filtrate was concentrated *in vacuo*. Purification of the reaction mixture using MPLC afforded the product.

### D. Synthesis of Styryl Azides.

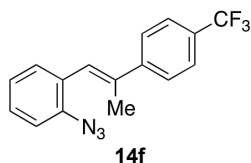

**Styryl Azide 14f.** The general procedure for azidation was followed using 0.31 g of aniline **s20** (1.1 mmol), 0.01 g of CuSO<sub>4</sub>, freshly prepared dichloromethane solution of TfN<sub>3</sub> (from 3.0 mmol of Tf<sub>2</sub>O), and 0.4 mL of Et<sub>3</sub>N (3.0 mmol) in 4 mL CH<sub>2</sub>Cl<sub>2</sub>, 2 mL of MeOH and 1 mL of H<sub>2</sub>O. Purification by MPLC (1:100 EtOAc: hexanes) afforded the product as a light yellow solid (0.22 g, 66%): mp 62 - 65 °C; <sup>1</sup>H NMR (500 MHz, CDCl<sub>3</sub>) δ 7.51 (d, *J* = 8.0 Hz, 2H), 7.28 (d, *J* = 8.0 Hz, 2H), 7.17 – 7.20 (m, 1H), 7.12 (dd, *J* = 1.0 Hz, 8.0 Hz, 1H), 6.80 – 6.83 (m, 1H), 6.74 (d, *J* = 7.5 Hz, 1H), 6.65 (s, 1H), 2.29 (s, 3H); <sup>13</sup>C NMR (125 MHz, CDCl<sub>3</sub>) δ 145.3 (C), 138.6 (C), 138.1 (C), 131.1 (CH), 129.076 (q, *J*<sub>CF</sub> = 32.6 Hz, C), 129.075 (C), 128.7 (CH), 128.1 (CH), 125.2 (q, *J*<sub>CF</sub> = 3.5 Hz, CH), 124.3 (CH), 124.2 (q, *J*<sub>CF</sub> = 271 Hz, C), 123.5 (CH), 118.2 (CH), 23.0 (CH<sub>3</sub>); <sup>19</sup>F NMR (CDCl<sub>3</sub>, 282 MHz) δ –63.04; IR (thin film): 2122, 1615, 1482, 1323, 1123, 738 cm<sup>-1</sup>. HRMS (EI) *m/z* calcd for C<sub>16</sub>H<sub>12</sub>N<sub>3</sub>F<sub>3</sub> (M)<sup>+</sup> 303.09833, found 303.09697.

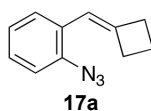

**Styryl Azide 17a.** The general procedure for azidation was followed using 0.23 g of aniline **s18** (1.44 mmol), 0.02 g of CuSO<sub>4</sub>, freshly prepared dichloromethane solution of TfN<sub>3</sub> (from 4.5 mmol of Tf<sub>2</sub>O), and 0.6 mL of Et<sub>3</sub>N (4.5 mmol) in 6 mL CH<sub>2</sub>Cl<sub>2</sub>, 3 mL of MeOH and 2 mL of H<sub>2</sub>O. Purification by MPLC (100% hexanes) afforded the product as a light yellow oil (0.14 g, 54%): <sup>1</sup>H NMR (500 MHz, CDCl<sub>3</sub>) δ 7.30 (d, *J* = 8.0 Hz, 1H), 7.23 (t, *J* = 8.0 Hz, 1H), 7.15 (d, *J* = 8.0 Hz, 1H), 7.11 (t, *J* = 7.5 Hz, 1H), 6.35 (s, 1H), 3.01 – 3.04 (m, 2H), 2.92 – 2.95 (m, 2H), 2.12 – 2.16 (m, 2H); <sup>13</sup>C NMR (125 MHz, CDCl<sub>3</sub>) δ 146.5 (C), 136.5 (C), 129.5 (C), 127.9 (CH), 127.1 (CH), 124.5 (CH), 118.3 (CH), 115.1 (CH), 32.9 (CH<sub>2</sub>), 32.7 (CH<sub>2</sub>), 18.4 (CH<sub>2</sub>); IR (thin film): 2951, 2113, 1482, 1285, 1099, 743, 665 cm<sup>-1</sup>. HRMS (EI) *m/z* calcd for C<sub>11</sub>H<sub>11</sub>N<sub>3</sub> (M)<sup>+</sup> 185.09530, found 185.09451.

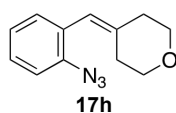

**Styryl Azide 17h.** The general procedure for azidation was followed using 0.43 g of aniline **s19** (2.28 mmol), 0.02 g of CuSO<sub>4</sub>, freshly prepared dichloromethane solution of TfN<sub>3</sub> (from 9.0 mmol of Tf<sub>2</sub>O), and 1.3 mL of Et<sub>3</sub>N (9.0 mmol) in 6 mL CH<sub>2</sub>Cl<sub>2</sub>, 3 mL of MeOH and 2 mL of H<sub>2</sub>O. Purification by MPLC (1:100 EtOAc: hexanes) afforded the product as a light yellow oil (0.31 g, 63%): <sup>1</sup>H NMR (500 MHz, CDCl<sub>3</sub>) 7.22 – 7.25 (m, 1H), 7.10 – 7.15 (m, 2H), 7.07 (t, *J* = 7.5 Hz, 1H), 6.24 (s, 1H), 3.77 (t, *J* = 5.5 Hz, 2H), 3.64 (t, *J* = 5.5 Hz, 2H), 2.37 – 2.41 (m, 4H); <sup>13</sup>C NMR (125 MHz, CDCl<sub>3</sub>) δ 139.3 (C), 138.1 (C), 130.8 (CH), 129.1 (C), 128.0 (CH), 124.3 (CH), 119.3 (CH), 118.4 (CH), 69.4 (CH<sub>2</sub>), 68.6 (CH<sub>2</sub>), 37.2 (CH<sub>2</sub>), 30.9 (CH<sub>2</sub>); IR (thin film): 2115, 2082, 1482, 1279, 1230, 1097, 997, 748, 665 cm<sup>-1</sup>. HRMS (EI) *m/z* calcd for C<sub>12</sub>H<sub>13</sub>ON<sub>3</sub> (M)<sup>+</sup> 215.10587, found 215.10709.

### III. Preparation of Substrates using a Suzuki Reaction.

#### General Procedure for the Arylboronic Acid Pinacol Ester Syntheses.

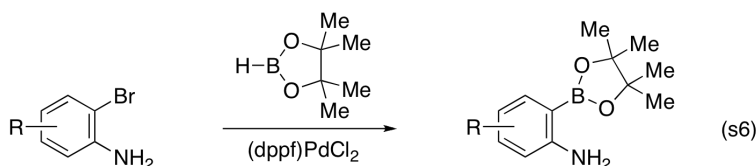

To a mixture of 0.85 g of 2-bromo-aniline (5.0 mmol), 2.09 mL of Et<sub>3</sub>N (20.0 mmol), 0.185 g of (dppf)PdCl<sub>2</sub> (0.25 mmol) in 15 mL 1,4-dioxane, was added dropwise 2.20 mL 4,4,5,5-tetramethyl-1,3,2-dioxaborolane (15.0 mmol). The resultant mixture was heated to 100 °C. After 12h, the mixture was cooled to room temperature and diluted with 20 mL of NH<sub>4</sub>Cl. The resulting aqueous phase was extracted with an additional 2 × 20 mL of CH<sub>2</sub>Cl<sub>2</sub>. The combined organic phases were washed with 1 × 30 mL of brine. The resulting organic phase was dried over Na<sub>2</sub>SO<sub>4</sub>, and was concentrated *in vacuo*. Purification via MPLC afforded the product.

## A. Syntheses of Arylboronic Acid Pinacol Esters.

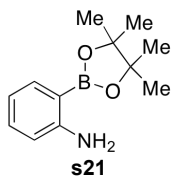

**Aniline s21.**<sup>8</sup> The general procedure was followed using 3.4 g of 2-bromo-aniline (20.0 mmol), 8.7 mL of 4,4,5,5-tetramethyl-1,3,2-dioxaborolane (60.0 mmol), 0.82 g of (dppf)PdCl<sub>2</sub> (1.0 mmol), and 8.4 mL of Et<sub>3</sub>N (80.0 mmol) in 100 mL of 1,4-dioxane. Purification by MPLC (2:100 – 10:90 EtOAc: hexanes) afforded the product as a light yellow solid (3.02 g, 69%): mp 62 -64 °C; The spectral data matched that reported by Driver and co-workers:<sup>8</sup> <sup>1</sup>H NMR (500 MHz, CDCl<sub>3</sub>) δ 7.64 (d, *J* = 7.5 Hz, 1H), 7.24 (t, *J* = 7.0 Hz, 1H), 6.70 (t, *J* = 7.0 Hz, 1H), 6.61 (d, *J* = 8.5 Hz, 1H), 4.76 (s, 2H), 1.36 (s, 12H); <sup>13</sup>C NMR (125 MHz, CDCl<sub>3</sub>) δ 153.7 (C), 136.8 (CH), 132.8 (CH), 116.9 (CH), 114.8 (CH), 83.5 (C), 25.0 (CH<sub>3</sub>); IR (thin film): 3486, 3380, 1624, 1605, 1352, 1311, 1244, 1135, 1086, 847, 758, 654 cm<sup>-1</sup>.

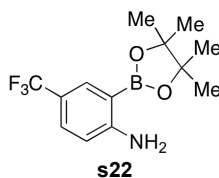

**Aniline s22.**<sup>8</sup> The general procedure was followed using 2.65 g of 2-bromo-4-(trifluoromethyl)aniline (10.0 mmol), 4.4 mL of 4,4,5,5-tetramethyl-1,3,2-dioxaborolane (30.0 mmol), 0.41 g of (dppf)PdCl<sub>2</sub> (0.5 mmol), and 4.2 mL of Et<sub>3</sub>N (40.0 mmol) in 50 mL of 1,4-dioxane. Purification by MPLC (2:100 – 10:90 EtOAc: hexanes) afforded the product as a brown solid (1.81 g, 63%): mp 107 -109 °C. The spectral data matched that reported by Driver and co-workers:<sup>8</sup> <sup>1</sup>H NMR (500 MHz, CDCl<sub>3</sub>) δ 7.86 (s, 1H), 7.41 (d, *J* = 8.5 Hz, 1H), 6.59 (d, *J* = 8.5 Hz, 1H), 5.08 (s, 2H), 1.35 (s, 12H); <sup>13</sup>C NMR (125 MHz, CDCl<sub>3</sub>) δ 156.1 (C), 134.3 (q, *J*<sub>CF</sub> = 3.8 Hz, CH), 129.5 (q, *J*<sub>CF</sub> = 3.8 Hz, CH), 125.0 (q, *J*<sub>CF</sub> = 268.8 Hz, C), 118.5 (q, *J*<sub>CF</sub> = 32.5 Hz, C), 84.0 (C), 114.2 (CH), 24.9 (CH<sub>3</sub>); <sup>19</sup>F NMR (CDCl<sub>3</sub>, 282 MHz) δ -61.64; IR (thin film): 3472, 3375, 1625, 1370, 1304, 1256, 1140, 1097, 1072, 832.9 cm<sup>-1</sup>.

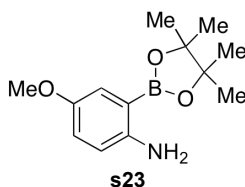

**Aniline s23.**<sup>8</sup> The general procedure was followed using 2.02 g of 2-bromo-4-methoxyaniline (10.0 mmol), 4.4 mL of 4,4,5,5-tetramethyl-1,3,2-dioxaborolane (30.0 mmol), 0.41 g of (dppf)PdCl<sub>2</sub> (0.5 mmol), and 4.2 mL of Et<sub>3</sub>N (40.0 mmol) in 50 mL of 1,4-dioxane. Purification by MPLC (5:100 – 10:90 EtOAc: hexanes) afforded the product as a brown liquid (1.52 g, 61%). The spectral data matched that reported by Driver and co-workers:<sup>8</sup> <sup>1</sup>H NMR (500 MHz, CDCl<sub>3</sub>) δ 7.15 (d, *J* = 3.5 Hz, 1H), 6.85 (dd, *J* = 3.0 Hz, 8.5 Hz, 1H), 6.58 (d, *J* = 8.5 Hz, 1H), 4.48 (s, 2H), 3.76 (s, 3H), 1.34 (s, 12H); <sup>13</sup>C NMR (125 MHz, CDCl<sub>3</sub>) δ 151.3 (C), 147.9 (C), 120.7 (CH), 119.5 (CH), 116.5 (CH), 83.6 (C), 56.0 (CH<sub>3</sub>), 25.0 (CH<sub>3</sub>); IR (thin film): 3456, 3366, 1494, 1421, 1359, 1304, 1226, 1037, 855, 829, 750 cm<sup>-1</sup>. HRMS (EI) *m/z* calcd for C<sub>13</sub>H<sub>20</sub>O<sub>3</sub>NB (M)<sup>+</sup> 249.1536, found 249.1540.

## B. General Procedure for the Triflate Formation.

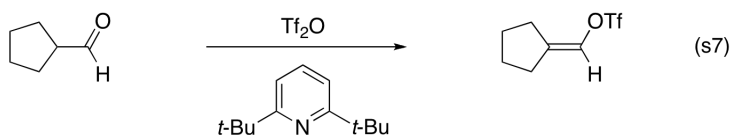

To a mixture of 10.0 mmol of cyclopentanecarboxaldehyde and 2.65 mL 2,6-di-*tert*-butylpyridine (12.0 mmol) in 40 mL of 1,2-dichloroethane was added 1.85 mL of triflic anhydride (11.0 mmol). The resultant mixture was heated to 70 °C. After 2h, the mixture was cooled to room temperature and diluted with 40 mL  $\text{CH}_2\text{Cl}_2$ . The resulting aqueous phase was extracted with an additional 2 × 30 mL of  $\text{CH}_2\text{Cl}_2$ . The combined organic phases were washed with 1 × 30 mL of brine. The resulting organic phase was dried over  $\text{Na}_2\text{SO}_4$ , and was concentrated *in vacuo* to afford crude triflate.

## C. General Procedure for the Suzuki Reaction.

Following the procedure of Driver and co-workers,<sup>8</sup> was aniline **s6** treated with vinyl triflate **s7** in the presence of (dppf) $\text{PdCl}_2$  to produce the desired aniline (s8). Yields were not optimized.

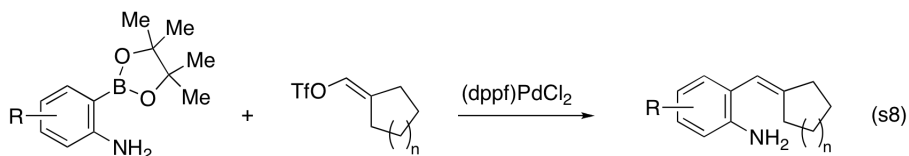

To a mixture of 0.919 g of boronic ether **s6** (3.2 mmol), 0.261 g of (dppf) $\text{PdCl}_2$  (0.32 mmol) in 40 mL 1,4-dioxane was added 8 mL of a 3M solution of NaOH in water followed by 1.36 g of crude triflate **s7** (5.12 mmol). The resultant mixture was heated to 80 °C. After 12 h, the mixture was cooled to room temperature and filtrated through a pad of Celite. The filtrate was diluted with 20 mL saturated  $\text{NH}_4\text{Cl}$  and extracted with an additional 2 × 30 mL of  $\text{CH}_2\text{Cl}_2$ . The combined organic phases were washed with 1 × 30 mL of brine. The resulting organic phase was dried over  $\text{Na}_2\text{SO}_4$ , and was concentrated *in vacuo*. Purification via MPLC afforded the product.

## D. Synthesis of Anilines.

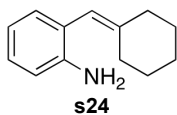

**Aniline s24.** The general procedure was followed using 1.10 g of boronic ester **s6** (5.0 mmol), crude vinyl triflate (derived from 10.0 mmol of cyclohexanecarboxaldehyde), 0.82 g of (dppf) $\text{PdCl}_2$  (1.0 mmol), and 1.8 g of NaOH (45.0 mmol) in 75 mL of 1,4-dioxane and 15 mL of water. Purification by MPLC (2:100 – 10:90 EtOAc: hexanes) afforded the product as a light yellow oil (0.74 g, 79%):  $^1\text{H}$  NMR (500 MHz,  $\text{CDCl}_3$ )  $\delta$  7.09 (t,  $J = 6.0$  Hz, 1H), 7.04 (d,  $J = 7.5$  Hz, 1H), 6.77 (t,  $J = 7.5$  Hz, 1H), 6.72 (d,  $J = 8.0$  Hz, 1H), 6.05 (s, 1H), 3.70 (s, 2H), 2.33 (t,  $J = 6.0$  Hz, 2H), 2.24 (t,  $J = 6.0$  Hz, 2H), 1.56 – 1.70 (m, 6H);  $^{13}\text{C}$  NMR (125 MHz,  $\text{CDCl}_3$ )  $\delta$  145.4 (C), 144.3 (C), 130.3 (CH), 127.5 (CH), 124.0 (C), 118.0 (CH), 117.8 (CH), 115.0 (CH), 37.2 ( $\text{CH}_2$ ), 30.0

(CH<sub>2</sub>), 28.9 (CH<sub>2</sub>), 28.1 (CH<sub>2</sub>), 26.8 (CH<sub>2</sub>); IR (thin film): 3466, 3368, 1161, 1489, 1448, 1297, 1265, 745 cm<sup>-1</sup>. HRMS (EI) *m/z* calcd for C<sub>13</sub>H<sub>17</sub>N (M)<sup>+</sup> 187.13610, found 187.13596.

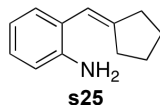

**Aniline s25.** The general procedure was followed using 2.19 g of boronic ester **s6** (10.0 mmol), crude vinyl triflate (derived from 15.0 mmol of cyclopentanecarboxaldehyde), 0.82 g of (dppf)PdCl<sub>2</sub> (1.0 mmol), and 3.6 g of NaOH (90.0 mmol) in 100 mL of 1, 4-dioxane and 30 mL of water. Purification by MPLC (2:100 – 10:90 EtOAc: hexanes) afforded the product as a light yellow oil (1.54 g, 89%): <sup>1</sup>H NMR (500 MHz, CDCl<sub>3</sub>) δ 7.16 (d, *J* = 7.5 Hz, 1H), 7.05 (dt, *J* = 1.5 Hz, 7.5 Hz, 1H), 6.76 (t, *J* = 7.5 Hz, 1H), 6.70 (d, *J* = 7.5 Hz, 1H), 6.23 (s, 1H), 3.67 (s, 2H), 2.49 (s, 2H), 2.39 (s, 2H), 1.70 – 1.73 (m, 4H); <sup>13</sup>C NMR (125 MHz, CDCl<sub>3</sub>) δ 148.6 (C), 143.7 (C), 129.1 (CH), 127.3 (CH), 124.9 (C), 118.2 (CH), 115.7 (CH), 115.2 (CH), 34.6 (CH<sub>2</sub>), 30.7 (CH<sub>2</sub>), 26.7 (CH<sub>2</sub>), 25.8 (CH<sub>2</sub>); IR (thin film): 3452, 3368, 1613, 1488, 1453, 1295, 1263, 1155, 871, 744 cm<sup>-1</sup>. HRMS (EI) *m/z* calcd for C<sub>12</sub>H<sub>15</sub>N (M)<sup>+</sup> 173.1164, found 173.1204.

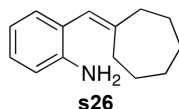

**Aniline s26.** The general procedure was followed using 0.76 g of boronic ester **s6** (3.5 mmol), crude vinyl triflate (derived from 10.0 mmol of cycloheptanecarboxaldehyde), 0.25 g of (dppf)PdCl<sub>2</sub> (0.3 mmol), and 1.2 g of NaOH (30.0 mmol) in 40 mL of 1, 4-dioxane and 10 mL of water. Purification by MPLC (2:100 – 10:90 EtOAc: hexanes) afforded the product as a light yellow oil (0.25 g, 35%): <sup>1</sup>H NMR (500 MHz, CDCl<sub>3</sub>) δ 7.07 (dt, *J* = 1.5 Hz, 7.5 Hz, 1H), 7.03 (d, *J* = 7.5 Hz, 1H), 6.74 (dt, *J* = 1.0 Hz, 7.5 Hz, 1H), 6.71 (dd, *J* = 1.5 Hz, 7.5 Hz, 1H), 6.10 (s, 1H), 3.68 (s, 2H), 2.43 – 2.45 (m, 2H), 2.31 – 2.33 (m, 2H), 1.68 – 1.72 (m, 2H), 1.52 – 1.62 (m, 6H); <sup>13</sup>C NMR (125 MHz, CDCl<sub>3</sub>) δ 147.5 (C), 144.0 (C), 130.0 (CH), 127.4 (CH), 124.5 (C), 121.0 (CH), 118.0 (CH), 114.9 (CH), 37.8 (CH<sub>2</sub>), 31.2 (CH<sub>2</sub>), 29.9 (CH<sub>2</sub>), 29.5 (CH<sub>2</sub>), 29.37 (CH<sub>2</sub>), 27.3 (CH<sub>2</sub>); IR (thin film): 3464, 3372, 2918, 2849, 1611, 1489, 1451, 745 cm<sup>-1</sup>. HRMS (EI) *m/z* calcd for C<sub>14</sub>H<sub>19</sub>N (M)<sup>+</sup> 201.15175 found 201.15198

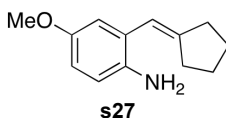

**Aniline s27.** The general procedure was followed using 1.69 g of boronic ester **s6** (6.8 mmol), crude vinyl triflate (derived from 10.0 mmol of cyclopentanecarboxaldehyde), 0.57 g of (dppf)PdCl<sub>2</sub> (0.68 mmol), and 1.44 g of NaOH (36.0 mmol) in 40 mL of 1, 4-dioxane and 12 mL of water. Purification by MPLC (2:100 – 20:80 EtOAc: hexanes) afforded the product as a brown oil (0.97 g, 70%): <sup>1</sup>H NMR (500 MHz, CDCl<sub>3</sub>) δ 6.77 (d, *J* = 1.8 Hz, 1H), 6.64 – 6.64 (m, 2H), 6.23 (t, *J* = 2.3 Hz, 1H), 3.75 (s, 3H), 3.44 (s, 2H), 2.48 (ddd, *J* = 7.7, 5.5, 1.9 Hz, 2H), 2.42-2.40 (m, 2H), 1.71 (m, 4H); <sup>13</sup>C NMR (125 MHz, CDCl<sub>3</sub>) δ 152.4 (C), 148.8 (C), 137.5 (C), 126.2 (C), 116.4 (CH), 115.9 (CH), 114.6 (CH), 112.9 (CH), 55.8 (CH<sub>3</sub>), 34.7 (CH<sub>2</sub>), 30.8 (CH<sub>2</sub>), 26.7 (CH<sub>2</sub>), 25.8 (CH<sub>2</sub>); IR (thin film): 3437, 3357, 2947, 1604, 1494, 1281, 1040, 904, 813 cm<sup>-1</sup>. HRMS (EI) *m/z* calcd for C<sub>13</sub>H<sub>17</sub>ON (M)<sup>+</sup> 203.13102, found 203.13075.

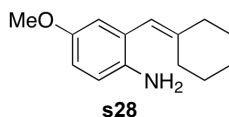

**Aniline s28.** The general procedure was followed using 1.44 g of boronic ester **s6** (5.8 mmol), crude vinyl triflate (derived from 9.0 mmol of cyclohexanecarboxaldehyde), 0.57 g of (dppf)PdCl<sub>2</sub> (0.68 mmol), and 1.20 g of NaOH (30.0 mmol) in 40 mL of 1, 4-dioxane and 10 mL of water. Purification by MPLC (2:100 – 20:80 EtOAc: hexanes) afforded the product as a brown oil (0.21 g, 17%): <sup>1</sup>H NMR (500 MHz, CDCl<sub>3</sub>): 6.60 – 6.68 (m, 3H), 6.01 (s, 1H), 3.74 (s, 3H), 3.13 (s, 2H), 2.29 (t, *J* = 6.0 Hz, 2H), 2.21 (t, *J* = 6.5 Hz, 2H), 1.52 – 1.66 (m, 6H); <sup>13</sup>C NMR (125 MHz, CDCl<sub>3</sub>) δ 152.2 (C), 145.6 (C), 138.0 (C), 125.3 (C), 117.7 (CH), 116.1 (CH), 115.7 (CH), 113.1 (CH), 55.8 (CH<sub>3</sub>), 37.2 (CH<sub>2</sub>), 30.0 (CH<sub>2</sub>), 28.8 (CH<sub>2</sub>), 28.0 (CH<sub>2</sub>), 26.7 (CH<sub>2</sub>); IR (thin film): 3438, 3358, 1494, 1276, 1216, 1159, 1039, 811 cm<sup>-1</sup>. HRMS (EI) *m/z* calcd for C<sub>14</sub>H<sub>19</sub>ON (M)<sup>+</sup> 217.1467, found 217.1466.

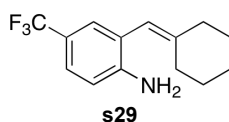

**Aniline s29.** The general procedure was followed using 3.01 g of boronic ester **s6** (10.5 mmol), crude vinyl triflate (derived from 15.0 mmol corresponding aldehyde), 0.87 g of (dppf)PdCl<sub>2</sub> (1.05 mmol), and 3.60 g of NaOH (90.0 mmol) in 110 mL of 1, 4-dioxane and 30 mL of water. Purification by MPLC (2:100 – 10:90 EtOAc: hexanes) afforded the product as a brown liquid (1.82 g, 62%): <sup>1</sup>H NMR (500 MHz, CDCl<sub>3</sub>) δ 7.30 (d, *J* = 8.5 Hz, 1H), 7.26 (s, 1H), 6.69 (d, *J* = 8.5 Hz, 1H), 5.98 (s, 1H), 4.01 (s, 2H), 2.32 (t, *J* = 5.5 Hz, 2H), 2.18 (t, *J* = 6.5 Hz, 2H), 1.54 – 1.71 (m, 6H); <sup>13</sup>C NMR (125 MHz, CDCl<sub>3</sub>) δ 147.3 (C), 147.1 (C), 127.3 (q, *J*<sub>CF</sub> = 3.8 Hz, CH), 125.1 (q, *J*<sub>CF</sub> = 268.8 Hz, C), 124.6 (q, *J*<sub>CF</sub> = 3.8 Hz, CH), 123.3 (C), 119.5 (q, *J*<sub>CF</sub> = 31.3 Hz, C), 116.4 (CH), 114.1 (CH), 37.1 (CH<sub>2</sub>), 30.0 (CH<sub>2</sub>), 28.8 (CH<sub>2</sub>), 28.0 (CH<sub>2</sub>), 26.6 (CH<sub>2</sub>); <sup>19</sup>F NMR (CDCl<sub>3</sub>, 282 MHz) δ – 61.47; IR (thin film): 3492, 3398, 1620, 1323, 1142, 1103, 1071, 820 cm<sup>-1</sup>. HRMS (EI) *m/z* calcd for C<sub>14</sub>H<sub>16</sub>NF<sub>3</sub> (M)<sup>+</sup> 255.1235, found 255.1239.

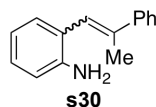

**Aniline s30.** The general procedure was followed using 1.75 g of boronic ester **s6** (8.0 mmol), crude vinyl triflate (derived from 15.0 mmol corresponding aldehyde), 0.66 g of (dppf)PdCl<sub>2</sub> (0.8 mmol), and 3.60 g of NaOH (90.0 mmol) in 110 mL of 1,4-dioxane and 30 mL of water. Purification by MPLC (1:100 – 10:90 EtOAc: hexanes) afforded the product as a light yellow oil, as a 69:31 mixture of *Z*- and *E*-isomers (1.41 g, 84%): *R*<sub>f</sub> = 0.45 (18:82 EtOAc: hexane). Selected spectral data for the major (*Z*) isomer: <sup>1</sup>H NMR (500 MHz, CDCl<sub>3</sub>) δ 7.11 – 7.23 (m, 5H), 6.97 (t, *J* = 8.0 Hz, 1H), 6.72 – 6.76 (m, 1H), 6.62 (d, *J* = 8.0 Hz, 1H), 6.52 (t, *J* = 7.5 Hz, 1H), 6.41 (s, 1H), 3.70 (br, 2H), 2.28 (s, 3H); <sup>13</sup>C NMR (125 MHz, CDCl<sub>3</sub>) δ 144.0 (C), 141.2 (C), 139.5 (C), 130.0 (CH), 128.1 (CH), 127.5 (CH), 127.0 (CH), 123.98 (C), 123.1 (CH), 118.3 (CH), 115.3 (CH), 25.7 (CH<sub>3</sub>) one overlapping aromatic C not distinguishable; Selected spectral data for the minor (*E*) isomer: <sup>1</sup>H NMR (500 MHz, CDCl<sub>3</sub>) δ 7.57 – 7.58 (m, 2H), 7.38 – 7.41 (m, 2H), 7.31 – 7.34 (m, 1H), 7.11- 7.23 (m, 2H), 6.81 (t, *J* = 7.5 Hz, 1H), 6.72 – 6.76 (m, 2H), 3.70 (br s, 2H), 2.17 (s, 3H); <sup>13</sup>C NMR (125 MHz, CDCl<sub>3</sub>) δ 144.4 (C), 142.9 (C), 139.1 (C), 130.5 (CH), 128.4 (CH), 128.1 (CH), 127.4 (CH), 124.01 (C), 123.9 (CH), 123.5 (CH), 118.2 (CH), 115.2 (CH), 17.2 (CH<sub>3</sub>); Selected spectral data for the mixture: δ IR (thin film): 3464, 3374, 1613, 1489, 1454, 1275, 1264 cm<sup>-1</sup>. HRMS (EI) *m/z* calcd for C<sub>15</sub>H<sub>15</sub>N (M)<sup>+</sup> 209.12045, found 209.12206.

## E. General Procedure for Styryl Azides Syntheses.

Following the procedure of Tor and co-workers,<sup>7</sup> the aniline group was transformed into an azide (s5). Yields were not optimized.

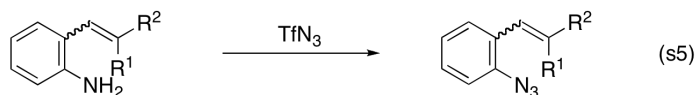

To a solution of aniline (3 mmol) in 5 mL of CH<sub>2</sub>Cl<sub>2</sub> was added subsequently 24 mg of CuSO<sub>4</sub>, 1.2 mL of Et<sub>3</sub>N, freshly prepared triflyl azide (9 mmol) in 15 mL of CH<sub>2</sub>Cl<sub>2</sub>, 1 mL of water and 2 mL of MeOH. The resulting mixture was allowed to react at room temperature overnight. Then, the reaction mixture was taken up by 15 mL dichloromethane, neutralized with a saturated aq. soln. of NaHCO<sub>3</sub> and washed with 3 × 10 mL of CH<sub>2</sub>Cl<sub>2</sub>. The resulting organic phase was washed with 20 mL of brine and dried over Na<sub>2</sub>SO<sub>4</sub>. After filtration, the filtrate was concentrated *in vacuo*. Purification of the reaction mixture using MPLC afforded the product.

## F. Synthesis of Styryl Azides.

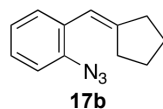

**Styryl Azide 17b.** The general procedure for azidation was followed using 0.95 g of aniline **s39** (5.5 mmol), 0.05 g of CuSO<sub>4</sub>, freshly prepared dichloromethane solution of TfN<sub>3</sub> (from 18.0 mmol of Tf<sub>2</sub>O), and 2.5 mL of Et<sub>3</sub>N (18.0 mmol) in 6 mL of CH<sub>2</sub>Cl<sub>2</sub>, 4 mL of MeOH and 2 mL of H<sub>2</sub>O. Purification by MPLC (1:100 EtOAc: hexanes) afforded the product as a light yellow oil, as a 72:28 mixture of *Z*- and *E*-isomers (0.68 g, 62%): Selected spectral data for the major (*Z*) isomer: <sup>1</sup>H NMR (500 MHz, CDCl<sub>3</sub>) δ 7.21 – 7.32 (m, 6H), 7.13 – 7.15 (d, *J* = 8.5 Hz, 1H), 6.80 – 6.84 (m, 2H), 6.62 (s, 1H), 2.33 (s, 3H); <sup>13</sup>C NMR (125 MHz, CDCl<sub>3</sub>) δ 141.5 (C), 140.3 (C), 137.9 (C), 131.2 (CH), 129.8 (C), 128.4 (CH), 127.7 (CH), 127.1 (CH), 124.2 (CH), 121.9 (CH), 118.1 (CH), 26.5 (CH<sub>3</sub>); Selected spectral data for the minor (*E*) isomer: <sup>1</sup>H NMR (500 MHz, CDCl<sub>3</sub>) δ 7.64 (dd, *J* = 1.0 Hz, 8.5 Hz, 2H), 7.36 – 7.47 (m, 5H), 7.18 (dd, *J* = 2.0 Hz, 6.0 Hz, 2H), 6.92 (s, 1H), 2.72 (s, 3H); <sup>13</sup>C NMR (125 MHz, CDCl<sub>3</sub>) δ 143.3 (C), 138.7 (C), 138.5 (C), 130.8 (CH), 130.2 (C), 128.5 (CH), 128.2 (CH), 127.5 (CH), 126.1 (CH), 124.4 (CH), 123.1 (CH), 118.5 (CH), 17.5 (CH<sub>3</sub>); Selected spectral data for the mixture: δ IR (thin film): 2116, 2083, 1479, 1443, 1278, 759 cm<sup>-1</sup>. HRMS (EI) *m/z* calcd for C<sub>12</sub>H<sub>13</sub>N<sub>3</sub> (M)<sup>+</sup> 199.1109, found 199.1112.

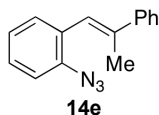

**Styryl Azide 14e.**<sup>9</sup> The general procedure for azidation was followed using 0.65 g of aniline **s30** (3.1 mmol), 0.02 g of CuSO<sub>4</sub>, freshly prepared dichloromethane solution of TfN<sub>3</sub> (from 9.0 mmol of Tf<sub>2</sub>O), and 1.3 mL of Et<sub>3</sub>N (9.0 mmol) in 4 mL of CH<sub>2</sub>Cl<sub>2</sub>, 2 mL of MeOH and 1 mL of H<sub>2</sub>O. Purification by MPLC (1:100 – 20:80 EtOAc: hexanes) afforded the product as a light yellow oil, as a 72:28 mixture of *Z*- and *E*-isomers (0.59 g, 81%): Selected spectral data for the major (*Z*) isomer: <sup>1</sup>H NMR (500 MHz, CDCl<sub>3</sub>) δ 7.21 – 7.32 (m, 6H), 7.13 – 7.15 (d, *J* = 8.5 Hz, 1H), 6.80 – 6.84 (m, 2H), 6.62 (s, 1H), 2.33 (s, 3H); <sup>13</sup>C NMR (125 MHz, CDCl<sub>3</sub>) δ 141.5 (C), 140.3 (C), 137.9 (C), 131.2 (CH), 129.8 (C), 128.4 (CH), 127.7 (CH), 127.1 (CH), 124.2 (CH), 121.9 (CH), 118.1 (CH), 26.5 (CH<sub>3</sub>) one overlapping aromatic C not distinguishable; Selected spectral data for the minor (*E*) isomer: <sup>1</sup>H NMR (500 MHz, CDCl<sub>3</sub>) δ 7.64 (dd, *J* = 1.0 Hz, 8.5 Hz, 2H), 7.36 – 7.47 (m, 5H), 7.18 (dd, *J* = 2.0

Hz, 6.0 Hz, 2H), 6.92 (s, 1H), 2.72 (s, 3H);  $^{13}\text{C}$  NMR (125 MHz,  $\text{CDCl}_3$ )  $\delta$  143.3 (C), 138.7 (C), 138.5 (C), 130.8 (CH), 130.2 (C), 128.5 (CH), 128.2 (CH), 127.5 (CH), 126.1 (CH), 124.4 (CH), 123.1 (CH), 118.5 (CH), 17.5 ( $\text{CH}_3$ ); Selected spectral data for the mixture:  $\delta$  IR (thin film): 2116, 2083, 1479, 1443, 1278, 759  $\text{cm}^{-1}$ . HRMS (EI)  $m/z$  calcd for  $\text{C}_{15}\text{H}_{13}\text{N}_3$  ( $\text{M}^+$ ) 235.11095, found 235.11230.

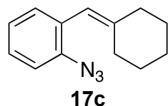

**Styryl Azide 17c.** The general procedure for azidation was followed using 1.42 g of aniline **s39** (7.6 mmol), 0.06 g of  $\text{CuSO}_4$ , freshly prepared dichloromethane solution of  $\text{TfN}_3$  (from 22.8 mmol of  $\text{Tf}_2\text{O}$ ), and 3.2 mL of  $\text{Et}_3\text{N}$  (22.8 mmol) in 10 mL of  $\text{CH}_2\text{Cl}_2$ , 5 mL of MeOH and 3 mL of  $\text{H}_2\text{O}$ . Purification by MPLC (100% hexane) afforded the product as a light yellow oil (1.36 g, 84%):  $^1\text{H}$  NMR (500 MHz,  $\text{CDCl}_3$ )  $\delta$  7.23 – 7.27 (m, 1H), 7.17 (d,  $J = 7.5$  Hz, 1H), 7.13 (dd,  $J = 1.0$  Hz, 8.0 Hz, 1H), 7.07 – 7.10 (m, 1H), 6.14 (s, 1H), 2.30 (t,  $J = 5.5$  Hz, 2H), 2.25 (t,  $J = 5.5$  Hz, 2H), 1.55 – 1.68 (m, 6H);  $^{13}\text{C}$  NMR (125 MHz,  $\text{CDCl}_3$ )  $\delta$  145.0 (C), 138.0 (C), 131.0 (CH), 130.2 (C), 127.5 (CH), 124.3 (CH), 118.3 (CH), 117.3 (CH), 37.5 ( $\text{CH}_2$ ), 29.8 ( $\text{CH}_2$ ), 28.6 ( $\text{CH}_2$ ), 27.9 ( $\text{CH}_2$ ), 26.7 ( $\text{CH}_2$ ); IR (thin film): 2112, 2080, 1482, 1444, 1281, 836, 746, 836, 746, 725, 671  $\text{cm}^{-1}$ . HRMS (EI)  $m/z$  calcd for  $\text{C}_{13}\text{H}_{15}\text{N}_3$  ( $\text{M}^+$ ) 213.12660, found 213.12686.

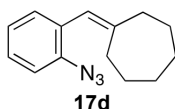

**Styryl Azide 17d.** The general procedure for azidation was followed using 0.21 g of aniline **s39** (1.1 mmol), 0.01 g of  $\text{CuSO}_4$ , freshly prepared dichloromethane solution of  $\text{TfN}_3$  (from 3.0 mmol of  $\text{Tf}_2\text{O}$ ), and 0.4 mL of  $\text{Et}_3\text{N}$  (3.0 mmol) in 4 mL of  $\text{CH}_2\text{Cl}_2$ , 2 mL of MeOH and 1 mL of  $\text{H}_2\text{O}$ . Purification by MPLC (100% hexane) afforded the product as a light yellow oil (0.18 g, 76%):  $^1\text{H}$  NMR (500 MHz,  $\text{CDCl}_3$ )  $\delta$  7.19 – 7.26 (m, 2H), 7.08 – 7.14 (m, 2H), 6.25 (s, 1H), 2.45 (t,  $J = 6.0$  Hz, 2H), 2.37 (t,  $J = 6.0$  Hz, 2H), 1.58 – 1.70 (m, 8H);  $^{13}\text{C}$  NMR (125 MHz,  $\text{CDCl}_3$ )  $\delta$  146.8 (C), 137.8 (C), 130.6 (CH), 127.4 (CH), 124.3 (CH), 120.6 (CH), 118.3 (CH), 38.3 ( $\text{CH}_2$ ), 31.3 ( $\text{CH}_2$ ), 29.8 ( $\text{CH}_2$ ), 29.3 ( $\text{CH}_2$ ), 29.1 ( $\text{CH}_2$ ), 27.3 ( $\text{CH}_2$ ) one overlapping aromatic C not distinguishable; IR (thin film): 2919, 2113, 2079, 1572, 1480, 1443, 1281, 1085, 746  $\text{cm}^{-1}$ . HRMS (EI)  $m/z$  calcd for  $\text{C}_{14}\text{H}_{17}\text{N}_3$  ( $\text{M}^+$ ) 227.14225 found 227.14169.

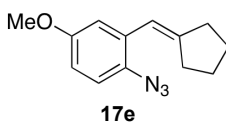

**Styryl Azide 17e.** The general procedure for azidation was followed using 0.97 g of aniline **s39** (4.8 mmol), 0.02 g of  $\text{CuSO}_4$ , freshly prepared dichloromethane solution of  $\text{TfN}_3$  (from 14.4 mmol of  $\text{Tf}_2\text{O}$ ), and 2.0 mL of  $\text{Et}_3\text{N}$  (14.4 mmol) in 6 mL  $\text{CH}_2\text{Cl}_2$ , 3 mL of MeOH and 2 mL of  $\text{H}_2\text{O}$ . Purification by MPLC (100% hexane) afforded the product as a light yellow oil (0.80 g, 73%):  $^1\text{H}$  NMR (500 MHz,  $\text{CDCl}_3$ )  $\delta$  7.04 (d,  $J = 8.7$  Hz, 1H), 6.93 (d,  $J = 2.8$  Hz, 1H), 6.77 (dd,  $J = 8.7, 2.9$  Hz, 1H), 6.43 (s, 1H), 3.80 (s, 3H), 2.46 – 2.52 (m, 4H), 1.71 – 1.78 (m, 2H), 1.71 – 1.66 (m, 2H);  $^{13}\text{C}$  NMR (125 MHz,  $\text{CDCl}_3$ )  $\delta$  156.4 (C), 149.3 (C), 131.6 (C), 129.8 (C), 119.1 (CH), 115.3 (CH), 114.6 (CH), 112.5 (CH), 55.5 ( $\text{CH}_3$ ), 35.5 ( $\text{CH}_2$ ), 31.2 ( $\text{CH}_2$ ), 27.0 ( $\text{CH}_2$ ), 25.6 ( $\text{CH}_2$ ); IR (thin film): 2953, 2115, 2080, 1480, 1446, 744  $\text{cm}^{-1}$ . HRMS (EI)  $m/z$  calcd for  $\text{C}_{13}\text{H}_{15}\text{ON}_3$  ( $\text{M}^+$ ) 229.12152, found 229.12192.



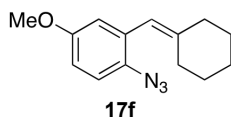

**Styryl Azide 17f.** The general procedure for azidation was followed using 0.21 g of aniline **s39** (1.0 mmol), 0.01 g of CuSO<sub>4</sub>, freshly prepared dichloromethane solution of TfN<sub>3</sub> (from 3.0 mmol of Tf<sub>2</sub>O), and 1.3 mL of Et<sub>3</sub>N (3.0 mmol) in 3 mL of CH<sub>2</sub>Cl<sub>2</sub>, 2 mL of MeOH and 1 mL of H<sub>2</sub>O. Purification by MPLC (100% hexane) afforded the product as a light yellow oil (0.41 g, 43%): <sup>1</sup>H NMR (500 MHz, CDCl<sub>3</sub>) δ 7.04 (d, *J* = 9.0 Hz, 1H), 6.80 (dd, *J* = 3.0 Hz, 8.5 Hz, 1H), 6.72 (d, *J* = 3.0 Hz, 1H), 6.12 (s, 1H), 3.79 (s, 3H), 2.26 – 2.31 (m, 4H), 1.56 – 1.67 (m, 6H); <sup>13</sup>C NMR (125 MHz, CDCl<sub>3</sub>) δ 156.3 (C), 145.3 (C), 131.3 (C), 130.6 (C), 119.3 (CH), 117.4 (CH), 116.4 (CH), 112.8 (CH), 55.5 (CH<sub>3</sub>), 37.4 (CH<sub>2</sub>), 29.9 (CH<sub>2</sub>), 28.6 (CH<sub>2</sub>), 27.8 (CH<sub>2</sub>), 26.6 (CH<sub>2</sub>); IR (thin film): 2106, 2084, 1486, 1284, 1239, 1165, 1035, 798, 732 cm<sup>-1</sup>. HRMS (EI) *m/z* calcd for C<sub>14</sub>H<sub>17</sub>ON<sub>3</sub> (M)<sup>+</sup> 243.1372, found 243.1372.

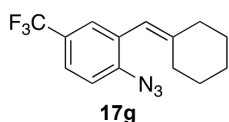

**Styryl Azide 17g.** The general procedure for azidation was followed using 1.60 g of aniline **s39** (6.3 mmol), 0.04 g of CuSO<sub>4</sub>, freshly prepared dichloromethane solution of TfN<sub>3</sub> (from 18.8 mmol of Tf<sub>2</sub>O), and 2.6 mL of Et<sub>3</sub>N (18.8 mmol) in 8 mL of CH<sub>2</sub>Cl<sub>2</sub>, 4 mL of MeOH and 3 mL of H<sub>2</sub>O. Purification by MPLC (100% hexane) afforded the product as a light yellow oil (0.04 g, 3%): <sup>1</sup>H NMR (500 MHz, CDCl<sub>3</sub>) δ 7.49 (dd, *J* = 8.5 Hz, 2.0 Hz, 1H), 7.40 (s, 1H), 7.20 (d, *J* = 7.0 Hz, 1H), 6.11 (s, 1H), 2.30 (t, *J* = 5.5 Hz, 2H), 2.22 (t, *J* = 5.5 Hz, 2H), 1.54 – 1.70 (m, 6H); <sup>13</sup>C NMR (125 MHz, CDCl<sub>3</sub>) δ 146.7 (C), 141.5 (C), 130.6 (C), 128.2 (q, *J*<sub>CF</sub> = 3.6 Hz, CH), 126.4 (q, *J*<sub>CF</sub> = 31.4 Hz, C), 124.4 (q, *J*<sub>CF</sub> = 3.4 Hz, CH), 124.0 (q, *J*<sub>CF</sub> = 270.1 Hz, C), 118.5 (CH), 116.3 (CH), 37.4 (CH<sub>2</sub>), 29.8 (CH<sub>2</sub>), 28.5 (CH<sub>2</sub>), 27.8 (CH<sub>2</sub>), 26.5 (CH<sub>2</sub>); <sup>19</sup>F NMR (CDCl<sub>3</sub>, 282 MHz) δ -61.62; IR (thin film): 2929, 2120, 2088, 1329, 1289, 1106, 817 cm<sup>-1</sup>. HRMS (EI) *m/z* calcd for C<sub>14</sub>H<sub>14</sub>NF<sub>3</sub> (M - N<sub>2</sub>)<sup>+</sup> 255.1000, found 255.1000.

## IV. Development of Rhodium-Catalyzed Migration Reaction.

### A. General Procedure for the Screening of Catalysts to Promote the Migration.

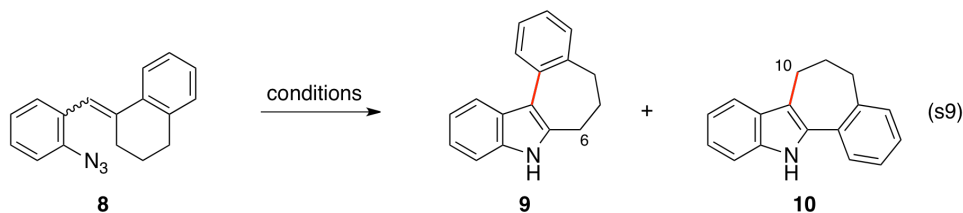

To a mixture of 0.026 g of aryl azide **8** (0.1 mmol), 0-100 % w/w of crushed 4 Å mol sieves, and metal salt (0 – 5 mol %) in Schlenk tube was added 0.50 mL of solvent. The resulting mixture was heated and, after 16 h, the heterogenous mixture was filtered through a short pad of Al<sub>2</sub>O<sub>3</sub>. The filtrate was concentrated *in vacuo*. The resulting solid (oil) was dissolved in 1.5 mL of CDCl<sub>3</sub> and 0.007 mL of dibromomethane (0.1 mmol) was added. The areas of the C–H peak on the carbon 6 position in **9** and carbon 10 in **10** were compared to the area of CH<sub>2</sub>Br<sub>2</sub> to derive a yield.

**Table s1.** Optimization of Migration Process<sup>a,b</sup>

| Entry | metal salt                                                                     | Mol % | solvent | wt %, 4 Å MS | T (°C) | yield, % <sup>c</sup> | 6 : 7 |
|-------|--------------------------------------------------------------------------------|-------|---------|--------------|--------|-----------------------|-------|
| 1     | none                                                                           | n.a.  | xylenes | 0            | 170    |                       | xx:xx |
| 2     | Rh <sub>2</sub> (O <sub>2</sub> CCH <sub>3</sub> ) <sub>4</sub>                | 5     | PhMe    | 100          | 70     | 8                     | n.a.  |
| 3     | Rh <sub>2</sub> (O <sub>2</sub> CCF <sub>3</sub> ) <sub>4</sub>                | 5     | PhMe    | 100          | 70     | 86                    | 100:0 |
| 4     | Rh <sub>2</sub> (O <sub>2</sub> CC <sub>3</sub> F <sub>7</sub> ) <sub>4</sub>  | 5     | PhMe    | 100          | 70     | 95                    | 100:0 |
| 5     | Rh <sub>2</sub> (O <sub>2</sub> CC <sub>7</sub> H <sub>15</sub> ) <sub>4</sub> | 5     | PhMe    | 100          | 70     | 93                    | 96:4  |
| 6     | Rh <sub>2</sub> (O <sub>2</sub> CC <sub>7</sub> H <sub>15</sub> ) <sub>4</sub> | 3     | PhMe    | 100          | 70     | 80 <sup>d</sup>       | 96:4  |
| 7     | Rh <sub>2</sub> (O <sub>2</sub> CC <sub>7</sub> H <sub>15</sub> ) <sub>4</sub> | 3     | PhMe    | 100          | 60     | 88 <sup>e</sup>       | 96:4  |
| 8     | Rh <sub>2</sub> (O <sub>2</sub> CC <sub>7</sub> H <sub>15</sub> ) <sub>4</sub> | 5     | PhMe    | 100          | 80     | 95                    | 96:4  |
| 9     | Rh <sub>2</sub> (O <sub>2</sub> CC <sub>7</sub> H <sub>15</sub> ) <sub>4</sub> | 5     | DCE     | 100          | 60     | 74 <sup>f</sup>       | 96:4  |
| 10    | Rh <sub>2</sub> (O <sub>2</sub> CC <sub>7</sub> H <sub>15</sub> ) <sub>4</sub> | 5     | DCE     | 100          | 70     | 94                    | 98:2  |
| 11    | Rh <sub>2</sub> (O <sub>2</sub> CC <sub>7</sub> H <sub>15</sub> ) <sub>4</sub> | 5     | DCE     | 100          | 80     | 88                    | 96:4  |
| 12    | Rh <sub>2</sub> (esp) <sub>2</sub>                                             | 5     | PhMe    | 100          | 70     | 98                    | >98:2 |
| 13    | RhCl <sub>3</sub>                                                              | 5     | PhMe    | 100          | 70     | 0                     | n.a.  |
| 14    | (Ph <sub>3</sub> P) <sub>3</sub> RuCl                                          | 5     | PhMe    | 100          | 70     | trace                 | n.a.  |
| 15    | Cu(OTf) <sub>2</sub>                                                           | 5     | PhMe    | 100          | 70     | 0                     | n.a.  |
| 16    | Ru(TPFP)CO                                                                     | 5     | IPAC    | 0            |        | 48                    | 100:0 |

<sup>a</sup> Reaction performed in conical vial. <sup>b</sup> 16 hour reaction time. <sup>c</sup> Isolated yield after Al<sub>2</sub>O<sub>3</sub> chromatography.

## B. Optimized General Procedure.

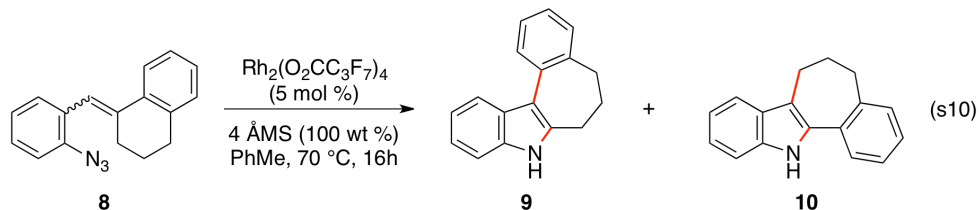

To a mixture of 0.026 g of aryl azide **5** (0.1 mmol), 100 % w/w of crushed 4 Å mol sieves, and metal salt (Rh<sub>2</sub>(esp)<sub>4</sub> or Rh<sub>2</sub>(hpfb)<sub>4</sub>, 5 mol %) in Schlenk tube was added 0.50 mL of PhMe. The resulting mixture was heated at 70 °C for 16 h, then, the heterogenous mixture was filtered through a short pad of Al<sub>2</sub>O<sub>3</sub>. The filtrate was concentrated *in vacuo* to afford analytically pure indole. In some cases, purification by MPLC is required.

## C. Effect of Aryl Azide Substitution on Rhodium-Catalyzed Migration Selectivity.

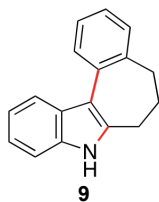

**Indole 9.** The general procedure was followed using 0.027 g of styryl azide **8** (0.102 mmol) and 0.005 g of Rh<sub>2</sub>(hpfb)<sub>4</sub> (0.005 mmol) in 0.5 mL of PhMe. Filtration by Al<sub>2</sub>O<sub>3</sub> afforded analytically pure compound **9** (0.025, 95%). mp 125 – 127 °C; <sup>1</sup>H NMR (500 MHz, CDCl<sub>3</sub>) δ 7.94 – 7.96 (m, 2H), 7.87 (d, *J* = 7.5 Hz, 1H), 7.34 –

7.40 (m, 2H), 7.30 (d,  $J = 7.5$  Hz, 1H), 7.18 – 7.24 (m, 3H), 2.94 (t,  $J = 7.5$  Hz, 2H), 2.76 – 2.78 (m, 2H), 2.23 – 2.29 (m, 2H);  $^{13}\text{C}$  NMR (125 MHz,  $\text{CDCl}_3$ )  $\delta$  141.0 (C), 136.9 (C), 135.7 (C), 135.1 (C), 129.3 (CH), 127.9 (CH), 127.3 (C), 126.3 (CH), 125.3 (CH), 121.6 (CH), 120.1 (CH), 119.2 (CH), 112.8 (C), 110.6 (CH), 33.5 ( $\text{CH}_2$ ), 30.1 ( $\text{CH}_2$ ), 26.5 ( $\text{CH}_2$ ); IR (thin film): 3396, 1599, 1492, 1459, 1275, 906, 745  $\text{cm}^{-1}$ . HRMS (EI)  $m/z$  calcd for  $\text{C}_{17}\text{H}_{15}\text{N}$  (M) $^+$  233.12054, found 233.11957.

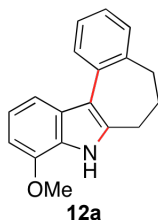

**Indoles 12a.** The general procedure was followed using 0.0291 g of styryl azide **11a** (0.100 mmol) and 0.0053 g of  $\text{Rh}_2(\text{hpfb})_4$  (0.005 mmol) in 0.5 mL of PhMe. Filtration by  $\text{Al}_2\text{O}_3$  afforded analytically pure compound **12a** (0.0252 g, 96%) as a colorless oil.  $^1\text{H}$  NMR (500 MHz,  $\text{CDCl}_3$ )  $\delta$  8.31 (br, 1H), 7.88 (dd,  $J = 1.0$  Hz, 7.5 Hz, 1H), 7.57 (d,  $J = 8.0$  Hz, 1H), 7.38 (dt,  $J = 1.5$  Hz, 7.5 Hz, 1H), 7.30 (dd,  $J = 1.0$  Hz, 7.5 Hz, 1H), 7.21 (dt,  $J = 1.5$  Hz, 7.5 Hz, 1H), 7.13 (t,  $J = 8.0$  Hz, 1H), 6.71 (d,  $J = 8.0$  Hz, 1H), 4.02 (s, 3H), 2.97 (t,  $J = 7.5$  Hz, 2H), 2.79 – 2.76 (m, 2H), 2.30 – 2.25 (m, 2H);  $^{13}\text{C}$  NMR (125 MHz,  $\text{CDCl}_3$ )  $\delta$  164.0 (C), 145.8 (C), 141.0 (C), 136.5 (C), 135.4 (C), 129.3 (CH), 128.6 (C), 128.0 (CH), 126.3 (CH), 125.2 (CH), 120.5 (CH), 113.3 (C), 112.2 (CH), 101.8 (CH), 55.4 ( $\text{CH}_3$ ), 33.6 ( $\text{CH}_2$ ), 30.2 ( $\text{CH}_2$ ), 26.4 ( $\text{CH}_2$ ); IR (thin film): 3443, 2941, 1497, 1264, 733  $\text{cm}^{-1}$ . HRMS (EI)  $m/z$  calcd for  $\text{C}_{18}\text{H}_{17}\text{ON}$  (M) $^+$  263.13102, found 263.13028.

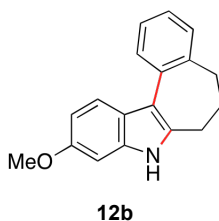

**Indoles 12b.** The general procedure was followed using 0.0291 g of styryl azide **11b** (0.100 mmol) and 0.0053 g of  $\text{Rh}_2(\text{hpfb})_4$  (0.005 mmol) in 0.5 mL of PhMe. Filtration by  $\text{Al}_2\text{O}_3$  afforded analytically pure compound **12b** (0.0254 g, 97%) as a white solid; mp 164 – 166  $^\circ\text{C}$ .  $^1\text{H}$  NMR (500 MHz,  $\text{CDCl}_3$ )  $\delta$  7.85 – 7.83 (m, 2H), 7.81 (d,  $J = 7.5$  Hz, 1H), 7.35 (dt,  $J = 1.5$  Hz, 7.5 Hz, 1H), 7.27 (dd,  $J = 1.0$  Hz, 7.5 Hz, 1H), 7.21 (dt,  $J = 1.0$  Hz, 7.5 Hz, 1H), 6.85 (dd,  $J = 2.5$  Hz, 8.5 Hz, 1H), 6.82 (d,  $J = 1.5$  Hz, 1H), 3.85 (s, 3H), 2.91 (t,  $J = 7.5$  Hz, 2H), 2.77 – 2.75 (m, 2H), 2.23 – 2.17 (m, 2H);  $^{13}\text{C}$  NMR (125 MHz,  $\text{CDCl}_3$ )  $\delta$  156.0 (C), 141.1 (C), 136.6 (C), 135.6 (C), 135.0 (C), 129.3 (CH), 127.8 (CH), 126.3 (CH), 125.2 (CH), 121.7 (C), 120.0 (CH), 112.5 (C), 109.3 (CH), 94.7 (CH), 55.8 ( $\text{CH}_3$ ), 33.7 ( $\text{CH}_2$ ), 29.5 ( $\text{CH}_2$ ), 26.8 ( $\text{CH}_2$ ); IR (thin film): 3399, 2937, 1461, 1264, 738  $\text{cm}^{-1}$ . HRMS (EI)  $m/z$  calcd for  $\text{C}_{18}\text{H}_{17}\text{ON}$  (M) $^+$  263.13102, found 263.13140.

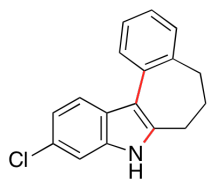

**12c**

**Indoles 12c.** The general procedure was followed using 0.0295 g of styryl azide **11c** (0.100 mmol) and 0.0053 g of  $\text{Rh}_2(\text{hpfb})_4$  (0.005 mmol) in 0.5 mL of PhMe. Filtration by  $\text{Al}_2\text{O}_3$  afforded analytically pure compound **12c** (0.0264 g, 99%) as a colorless oil.  $^1\text{H}$  NMR (500 MHz,  $\text{CDCl}_3$ )  $\delta$  7.92 (br, 1H), 7.82 (d,  $J = 8.5$  Hz, 1H), 7.79 (dd,  $J = 1.5$  Hz, 7.5 Hz, 1H), 7.37 (dt,  $J = 1.5$  Hz, 7.5 Hz, 1H), 7.32 – 7.28 (m, 2H), 7.21 (dt,  $J = 1.5$  Hz, 6.5 Hz, 1H), 7.14 (dd,  $J = 2.0$  Hz, 6.5 Hz, 1H), 2.91 (t,  $J = 7.5$  Hz, 2H), 2.78 – 2.74 (m, 2H), 2.26 – 2.21 (m, 2H);  $^{13}\text{C}$  NMR (125 MHz,  $\text{CDCl}_3$ )  $\delta$  141.1 (C), 137.5 (C), 136.1 (C), 134.5 (C), 129.4 (CH), 127.8 (CH), 127.3 (C), 126.4 (CH), 126.0 (C), 125.6 (CH), 120.7 (CH), 120.1 (CH), 112.9 (C), 110.5 (CH), 33.5 ( $\text{CH}_2$ ), 29.8 ( $\text{CH}_2$ ), 26.6 ( $\text{CH}_2$ ); IR (thin film): 3401, 2929, 1462, 1275, 749  $\text{cm}^{-1}$ . HRMS (EI)  $m/z$  calcd for  $\text{C}_{17}\text{H}_{14}\text{NCl}$  ( $\text{M}^+$ ) 267.08147, found 267.08182.

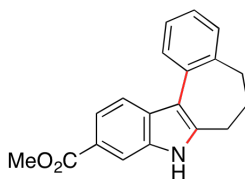

**12d**

**Indoles 12d.** The general procedure was followed using 0.0319 g of styryl azide **11d** (0.100 mmol) and 0.0053 g of  $\text{Rh}_2(\text{esp})_2$  (0.005 mmol) in 0.5 mL of PhMe. Filtration by  $\text{Al}_2\text{O}_3$  afforded analytically pure compound **12d** (0.0274 g, 94%) as a white solid; mp 203 – 205  $^\circ\text{C}$ .  $^1\text{H}$  NMR (500 MHz,  $\text{CDCl}_3$ )  $\delta$  8.55 (br, 1H), 8.11 (d,  $J = 1.5$  Hz, 1H), 7.91 (d,  $J = 8.5$  Hz, 1H), 7.85 (dd,  $J = 1.5$  Hz, 8.5 Hz, 1H), 7.79 (dd,  $J = 1.0$  Hz, 8.0 Hz, 1H), 7.37 (dt,  $J = 1.5$  Hz, 7.5 Hz, 1H), 7.29 (d,  $J = 7.5$  Hz, 1H), 7.20 (dt,  $J = 1.5$  Hz, 7.5 Hz, 1H), 3.96 (s, 3H), 2.97 (t,  $J = 7.5$  Hz, 2H), 2.75 – 2.72 (m, 2H), 2.30 – 2.25 (m, 2H);  $^{13}\text{C}$  NMR (125 MHz,  $\text{CDCl}_3$ )  $\delta$  168.4 (C), 140.9 (C), 140.8 (C), 135.0 (C), 134.5 (C), 130.9 (C), 129.4 (CH), 127.9 (CH), 126.4 (CH), 125.7 (CH), 122.9 (C), 121.3 (CH), 118.6 (CH), 113.5 (C), 112.9 (CH), 52.0 ( $\text{CH}_3$ ), 33.3 ( $\text{CH}_2$ ), 30.2 ( $\text{CH}_2$ ), 26.4 ( $\text{CH}_2$ ); IR (thin film): 3656, 2950, 1690, 1503, 1217, 1062, 911  $\text{cm}^{-1}$ . HRMS (EI)  $m/z$  calcd for  $\text{C}_{19}\text{H}_{17}\text{O}_2\text{N}$  ( $\text{M}^+$ ) 291.12593, found 291.12553.

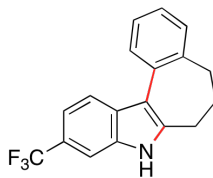

**12e**

**Indole 12e.** The general procedure was followed using 0.046 g of styryl azide **11e** (0.140 mmol) and 0.007 g of  $\text{Rh}_2(\text{hpfb})_4$  (0.007 mmol) in 0.6 mL of PhMe. Filtration by  $\text{Al}_2\text{O}_3$  afforded analytically pure compound **12e** (0.038 g, 90%).  $^1\text{H}$  NMR (500 MHz,  $\text{CDCl}_3$ ): 8.18 (s, 1H), 7.98 (d,  $J = 8.5$  Hz, 1H), 7.80 (d,  $J = 7.5$  Hz, 1H), 7.06 (s, 1H), 7.38 – 7.42 (m, 2H), 7.31 – 7.32 (m, 1H), 7.22 – 7.26 (m, 1H), 2.95 (t, 7.5 Hz, 2H), 2.73 – 2.76 (m, 2H), 2.24 – 2.30 (m, 2H);  $^{13}\text{C}$  NMR (125 MHz,  $\text{CDCl}_3$ ): 141.0 (C), 139.7 (C), 134.6 (C), 134.3 (C), 129.6 (C), 129.5 (CH), 127.9 (CH), 126.5 (CH), 125.8 (CH), 125.3 (q,  $J = 269.9$  Hz, C), 123.5 (q,  $J = 31.8$  Hz, C), 119.4 (CH), 116.8 (q,  $J = 3.5$  Hz, CH), 113.2 (C), 108.1 (q,  $J = 4.8$  Hz, CH), 33.3 ( $\text{CH}_2$ ), 30.1 ( $\text{CH}_2$ ), 26.4 ( $\text{CH}_2$ );  $^{19}\text{F}$

NMR (CDCl<sub>3</sub>, 282 MHz) ; IR (thin film): 3401, 2940, 1740, 1728, 1333, 1217, 1111, 1057 cm<sup>-1</sup>. HRMS (EI) *m/z* calcd for C<sub>18</sub>H<sub>14</sub>NF<sub>3</sub> (M)<sup>+</sup> 301.10783, found 301.10748.

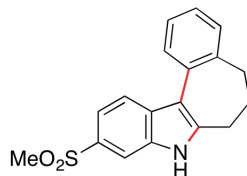

**12f**

**Indoles 12f.** The general procedure was followed using 0.0339 g of styryl azide **11f** (0.100 mmol) and 0.0053 g of Rh<sub>2</sub>(hpfb)<sub>4</sub> (0.005 mmol) in 0.5 mL of PhMe. Filtration by Al<sub>2</sub>O<sub>3</sub> afforded analytically pure compound **12f** (0.0295 g, 95%) as a white solid; mp 159 – 161 °C. <sup>1</sup>H NMR (500 MHz, CDCl<sub>3</sub>) δ 9.23 (br, 1H), 8.11 (d, *J* = 1.0 Hz, 1H), 7.97 (d, *J* = 8.5 Hz, 1H), 7.71 (d, *J* = 8.0 Hz, 1H), 7.65 (dd, *J* = 1.0 Hz, 8.5 Hz, 1H), 7.36 (dt, *J* = 1.0 Hz, 7.5 Hz, 1H), 7.29 (d, *J* = 7.5 Hz, 1H), 7.21 (dt, *J* = 1.0 Hz, 7.5 Hz, 1H), 3.13 (s, 3H), 2.99 (t, *J* = 7.5 Hz, 2H), 2.71 (t, *J* = 6.0 Hz, 2H), 2.29 – 2.24 (m, 2H); <sup>13</sup>C NMR (125 MHz, CDCl<sub>3</sub>) δ 142.4 (C), 140.9 (C), 134.5 (C), 134.1 (C), 132.0 (C), 131.0 (C), 129.1 (CH), 127.8 (CH), 126.5 (CH), 126.0 (CH), 119.6 (CH), 118.2 (CH), 113.4 (C), 111.0 (CH), 45.3 (CH<sub>3</sub>), 33.2 (CH<sub>2</sub>), 30.2 (CH<sub>2</sub>), 26.2 (CH<sub>2</sub>); IR (thin film): 3351, 2928, 1498, 1265, 1141, 740 cm<sup>-1</sup>. HRMS (EI) *m/z* calcd for C<sub>18</sub>H<sub>17</sub>O<sub>2</sub>NS (M)<sup>+</sup> 311.09800, found 311.09821.

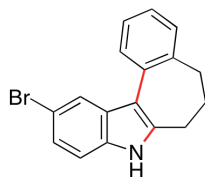

**12g**

**Indoles 12g.** The general procedure was followed using 0.0340 g of styryl azide **11g** (0.100 mmol) and 0.0053 g of Rh<sub>2</sub>(hpfb)<sub>4</sub> (0.005 mmol) in 0.5 mL of PhMe. Filtration by Al<sub>2</sub>O<sub>3</sub> afforded analytically pure compound **12g** (0.0295 g, 95%) as a white solid; mp 146 – 148 °C. <sup>1</sup>H NMR (500 MHz, CDCl<sub>3</sub>) δ 8.03 (d, *J* = 1.5 Hz, 1H), 8.00 (br, 1H), 7.76 (d, *J* = 7.5 Hz, 1H), 7.37 (dt, *J* = 1.5 Hz, 7.5 Hz, 1H), 7.29 – 7.26 (m, 2H), 7.21 (dt, *J* = 1.0 Hz, 6.5 Hz, 1H), 7.19 (d, *J* = 8.5 Hz, 1H), 2.92 (t, *J* = 7.5 Hz, 2H), 2.74 – 2.72 (m, 2H), 2.27 – 2.22 (m, 2H); <sup>13</sup>C NMR (125 MHz, CDCl<sub>3</sub>) δ 140.9 (C), 138.2 (C), 134.4 (C), 134.3 (C), 129.4 (CH), 129.0 (C), 127.8 (CH), 126.5 (CH), 125.7 (CH), 124.3 (CH), 121.6 (CH), 113.5 (C), 112.6 (C), 111.9 (CH), 33.4 (CH<sub>2</sub>), 30.1 (CH<sub>2</sub>), 26.4 (CH<sub>2</sub>); IR (thin film): 3411, 2936, 1469, 1264, 740 cm<sup>-1</sup>. HRMS (EI) *m/z* calcd for C<sub>17</sub>H<sub>14</sub>NBr (M)<sup>+</sup> 313.02891, found 313.03030.

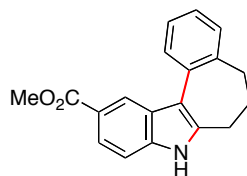

**12h**

**Indole 12h.** The general procedure was followed using 0.0319 g of styryl azide **11h** (0.100 mmol) and 0.0053 g of Rh<sub>2</sub>(esp)<sub>2</sub> (0.005 mmol) in 0.5 mL of PhMe. Filtration by Al<sub>2</sub>O<sub>3</sub> afforded analytically pure compound **12h** (0.0276 g, 95%) as a white solid; mp 244 – 246 °C. <sup>1</sup>H NMR (500 MHz, acetone-*d*<sub>6</sub>) δ 10.65 (br, 1H), 8.57 (s, 1H), 7.82 (dd, *J* = 1.0 Hz, 8.5 Hz, 1H), 7.79 (d, *J* = 7.5 Hz, 1H), 7.46 (d, *J* = 8.5 Hz, 1H), 7.37 (dt, *J* = 1.5 Hz,

7.5 Hz, 1H), 7.28 (d,  $J = 7.5$  Hz, 1H), 7.17 (dt,  $J = 1.5$  Hz, 7.5 Hz, 1H), 3.87 (s, 3H), 3.04 (t,  $J = 7.5$  Hz, 2H), 2.74 – 2.72 (m, 2H), 2.24 – 2.19 (m, 2H);  $^{13}\text{C}$  NMR (125 MHz, acetone- $d_6$ )  $\delta$  167.5 (C), 141.2 (C), 139.3 (C), 139.0 (C), 134.6 (C), 129.3 (CH), 127.7 (CH), 126.8 (C), 126.3 (CH), 125.4 (CH), 122.4 (CH), 121.6 (C), 121.2 (CH), 112.9 (C), 110.6 (CH), 51.0 (CH<sub>3</sub>), 33.3 (CH<sub>2</sub>), 29.6 (CH<sub>2</sub>), 26.1 (CH<sub>2</sub>); IR (thin film): 3643, 2951, 1737, 1231, 1062, 913, 857  $\text{cm}^{-1}$ . HRMS (EI)  $m/z$  calcd for C<sub>19</sub>H<sub>17</sub>O<sub>2</sub>N (M)<sup>+</sup> 291.12593, found 291.12504.

#### D. Effect of Migrating Group Identity on Rhodium-Catalyzed Migration Selectivity.

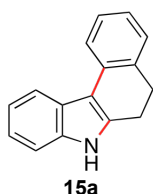

**Indole 15a.**<sup>10</sup> The general procedure was followed using 0.041 g of styryl azide **14a** (0.17 mmol) and 0.006 g of Rh<sub>2</sub>(esp)<sub>4</sub> (0.008 mmol) in 0.7 mL of PhMe. Filtration by Al<sub>2</sub>O<sub>3</sub> afforded a 98:2 mixture of compound **12a** and **12b**; Purification by MPLC (10:100 EtOAc: hexanes) afforded compound **15a** as a white powder (0.032 g, 88%); Indole **15a** was previously reported by Katritzky and Wang:<sup>10</sup>  $^1\text{H}$  NMR (500 MHz, CDCl<sub>3</sub>)  $\delta$  8.05 (d,  $J = 7.5$  Hz, 1H), 7.95 (s, 1H), 7.88 (d,  $J = 7.5$  Hz, 1H), 7.31 – 7.36 (m, 2H), 7.19 – 7.27 (m, 3H), 7.09 – 7.12 (m, 1H), 3.05 – 3.08 (t,  $J = 7.5$  Hz, 2H), 2.93 – 2.96 (t,  $J = 7.5$  Hz, 2H);  $^{13}\text{C}$  NMR (125 MHz, CDCl<sub>3</sub>):  $\delta$  137.2 (C), 136.2 (C), 133.9 (C), 133.3 (C), 128.0 (CH), 127.0 (CH), 125.0 (C), 124.3 (CH), 122.3 (CH), 121.5 (CH), 120.6 (CH), 119.5 (CH), 111.1 (CH), 110.8 (C), 29.5 (CH<sub>2</sub>), 22.5 (CH<sub>2</sub>); IR (thin film): 3396, 1601, 1497, 1456, 1255, 908, 767, 731  $\text{cm}^{-1}$ .

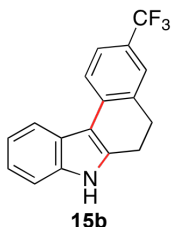

**Indole 15b.** The general procedure was followed using 0.050 g of styryl azide **14b** (0.16 mmol) and 0.006 g of Rh<sub>2</sub>(esp)<sub>4</sub> (0.008 mmol) in 0.6 mL of PhMe. Filtration by Al<sub>2</sub>O<sub>3</sub> afforded a 95:5 mixture of compound **15b** and **16b**; Purification by MPLC (10:100 EtOAc: hexanes) afforded compound **15b** as a light yellow powder (0.031 g, 78%); mp 227 – 230 °C;  $^1\text{H}$  NMR (500 MHz, DMSO)  $\delta$  8.03 (d,  $J = 7.5$  Hz, 1H), 7.93 – 7.95 (m, 1H), 7.37 – 7.45 (m, 3H), 7.11 – 7.13 (m, 2H), 3.10 (t,  $J = 7.5$  Hz, 2H), 2.98 (t,  $J = 8.0$  Hz, 2H), *N-H peak not available*;  $^{13}\text{C}$  NMR (125 MHz, DMSO)  $\delta$  139.2 (C), 136.9 (C), 136.4 (C), 131.6 (C), 127.53 (CH), 127.49 (q,  $J_{CF} = 27.8$  Hz, C), 126.0 (CH), 125.3 (q,  $J_{CF} = 272.0$  Hz, C), 124.6, 121.5 (CH), 120.9 (q,  $J_{CF} = 5.5$  Hz, CH), 120.6 (CH), 119.1 (CH), 112.2 (CH), 108.3 (C), 25.5 (CH<sub>2</sub>), 21.5 (CH<sub>2</sub>); IR (thin film): 3406, 1601, 1557, 1452, 1311, 1162, 1108, 749  $\text{cm}^{-1}$ . HRMS (EI)  $m/z$  calcd for C<sub>17</sub>H<sub>12</sub>NF<sub>3</sub> (M)<sup>+</sup> 287.09218, found 287.09182.

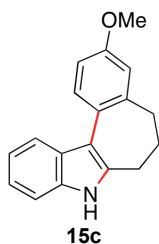

**Indole 15c.** The general procedure was followed using 0.041 g of styryl azide **14c** (0.141 mmol) and 0.005 g of  $\text{Rh}_2(\text{esp})_4$  (0.007 mmol) in 0.5 mL of PhMe. Filtration by  $\text{Al}_2\text{O}_3$  afforded analytically pure compound **15c** (0.034 g, 92%).  $^1\text{H}$  NMR (500 MHz,  $\text{CDCl}_3$ )  $\delta$  7.99 (s, 1H), 7.56 (d,  $J = 7.5$  Hz, 1H), 7.48 (d,  $J = 8.0$  Hz, 1H), 7.36 (d,  $J = 8.0$  Hz, 1H), 7.23 (t,  $J = 7.5$  Hz, 1H), 7.15 (t,  $J = 7.5$  Hz, 1H), 6.82 – 6.85 (m, 2H), 3.86 (s, 3H), 3.11 (t,  $J = 7.0$  Hz, 2H), 2.89 – 2.91 (m, 2H), 2.15 – 2.19 (m, 2H);  $^{13}\text{C}$  NMR (125 MHz,  $\text{CDCl}_3$ )  $\delta$  158.7 (C), 144.0 (C), 136.1 (C), 132.7 (C), 130.2 (C), 126.4 (CH), 124.6 (C), 122.4 (CH), 119.5 (CH), 118.4 (CH), 115.5 (CH), 113.1 (C), 111.5 (CH), 110.5 (CH), 55.3 ( $\text{CH}_3$ ), 35.6 ( $\text{CH}_2$ ), 26.7 ( $\text{CH}_2$ ), 26.0 ( $\text{CH}_2$ ); IR (thin film): 3414, 2926, 2834, 1605, 1461, 1433, 1260, 1243, 1033, 810, 735  $\text{cm}^{-1}$ . HRMS (EI)  $m/z$  calcd for  $\text{C}_{18}\text{H}_{17}\text{ON}$  ( $\text{M}$ ) $^+$  263.13102, found 263.13192.

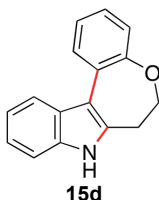

**Indole 15d.** The general procedure was followed using 0.052 g of styryl azide **14d** (0.198 mmol) and 0.008 g of  $\text{Rh}_2(\text{esp})_4$  (0.010 mmol) in 0.7 mL of PhMe. Filtration by  $\text{Al}_2\text{O}_3$  afforded analytically pure compound **15d** (0.044 g, 94%). mp 175 – 177  $^\circ\text{C}$ ;  $^1\text{H}$  NMR (500 MHz,  $\text{CDCl}_3$ )  $\delta$  8.14 (d,  $J = 7.5$  Hz, 1H), 8.10 (d,  $J = 7.5$  Hz, 1H), 8.04 (s, 1H), 7.31 – 7.32 (m, 1H), 7.12 – 7.26 (m, 5H), 4.39 (t,  $J = 6.0$  Hz, 2H), 3.32 (t,  $J = 6.0$  Hz, 2H);  $^{13}\text{C}$  NMR (125 MHz,  $\text{CDCl}_3$ )  $\delta$  158.7 (C), 136.5 (C), 134.8 (C), 128.4 (CH), 127.3 (C), 127.0 (C), 125.9 (CH), 123.8 (CH), 122.1 (CH), 121.1 (CH), 120.3 (CH), 120.2 (CH), 110.6 (CH), 109.7 (C), 70.0 ( $\text{CH}_2$ ), 31.0 ( $\text{CH}_2$ ); IR (thin film): 3348, 1492, 1459, 1441, 1196, 905, 748  $\text{cm}^{-1}$ . HRMS (EI)  $m/z$  calcd for  $\text{C}_{16}\text{H}_{13}\text{ON}$  ( $\text{M}$ ) $^+$  235.09972, found 235.10055.

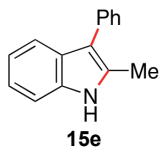

**Indole 15e.**<sup>11</sup> The general procedure was followed using 0.044 g of styryl azide **14e** (0.187 mmol) and 0.007 g of  $\text{Rh}_2(\text{esp})_4$  (0.009 mmol) in 0.6 mL of PhMe (reaction is set up at 80  $^\circ\text{C}$ ). Filtration by  $\text{Al}_2\text{O}_3$  afforded analytically pure compound **15e** (0.035 g, 91%). Spectral data for **15e** matched that reported by Tan and Hartwig:<sup>11</sup>  $^1\text{H}$  NMR (500 MHz,  $\text{CDCl}_3$ )  $\delta$  7.93 (s, 1H), 7.69 (d,  $J = 8.0$  Hz, 1H), 7.53 – 7.55 (m, 2H), 7.47 – 7.50 (m, 2H), 7.31 – 7.35 (m, 2H), 7.17 – 7.20 (m, 1H), 7.12 – 7.15 (m, 1H), 2.52 (s, 3H);  $^{13}\text{C}$  NMR (125 MHz,  $\text{CDCl}_3$ )  $\delta$  135.5 (C), 135.3 (C), 131.4 (C), 129.5 (CH), 128.5 (CH), 127.9 (C), 125.8 (CH), 121.6 (CH), 120.0 (CH), 118.8 (CH), 114.6 (C), 110.3 (CH), 12.6 ( $\text{CH}_3$ ); IR (thin film): 3401, 1603, 1496, 1459, 1258, 908, 748, 702  $\text{cm}^{-1}$ .

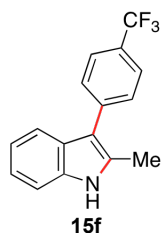

**Indole 15f.**<sup>12</sup> The general procedure was followed using 0.036 g of styryl azide **14f** (0.117 mmol) and 0.005 g of  $\text{Rh}_2(\text{esp})_4$  (0.006 mmol) in 0.5 mL of PhMe (reaction is set up at 80 °C). Filtration by  $\text{Al}_2\text{O}_3$  afforded analytically pure compound **15f** (0.030 g, 93%). Indole **15f** was previously reported by Chiba and co-workers.<sup>12</sup> Spectral data for **15f**:  $^1\text{H}$  NMR (500 MHz,  $\text{CDCl}_3$ )  $\delta$  8.02 (s, 1H), 7.73 (d,  $J = 8.5$  Hz, 1H), 7.66 (d,  $J = 7.5$  Hz, 1H), 7.63 (d,  $J = 8.0$  Hz, 1H), 7.36 (d,  $J = 8.0$  Hz, 1H), 7.22 (dt,  $J = 1.0$  Hz, 8.0 Hz, 1H), 7.16 (dt,  $J = 1.0$  Hz, 7.5 Hz, 1H), 2.53 (s, 3H);  $^{13}\text{C}$  NMR (125 MHz,  $\text{CDCl}_3$ )  $\delta$  139.4 (C), 135.3 (C), 132.2 (C), 129.4 (CH), 127.7 (q,  $J_{\text{CF}} = 32.8$  Hz, C), 127.5 (C), 125.5 (q,  $J_{\text{CF}} = 3.5$  Hz, CH), 124.5 (q,  $J_{\text{CF}} = 269.9$  Hz, C), 122.0 (CH), 120.4 (CH), 118.5 (CH), 113.4 (C), 110.5 (CH), 12.6 ( $\text{CH}_3$ ); IR (thin film): 3397, 1615, 1459, 1234, 1163, 1109, 1068, 747  $\text{cm}^{-1}$ .

## E. Effect of Ring Size on Rhodium-Catalyzed Migration.

### 1. General Procedure for the Optimization of Conditions to Promote the Migration.

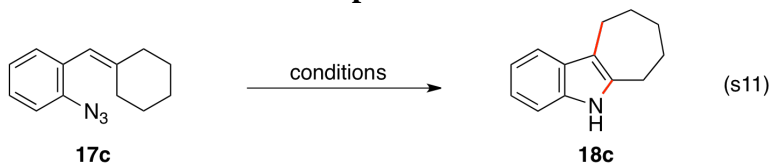

To a mixture of 0.1 mmol of aryl azide **17c** (0.1 mmol), 0-100 % w/w of crushed 4 Å mol sieves, and metal salt (0 – 5 mol %) in Schlenk tube was added 0.50 mL of solvent. The resulting mixture was heated and, after 16 h, the heterogenous mixture was filtered through a short pad of  $\text{Al}_2\text{O}_3$ . The filtrate was concentrated *in vacuo*. The resulting solid (oil) was dissolved in 1.5 mL of  $\text{CDCl}_3$  and 0.007 mL of dibromomethane (0.1 mmol) was added. The areas of the C–H peak on the carbon 13 position in **17c** and carbon 13 in **18c** were compared to the area of  $\text{CH}_2\text{Br}_2$  to derive a yield.



**Table s2.** Optimization of Migration Process

| entry | metal salt                                                                     | mol % | wt %, 4 Å MS | temp (°C) | yield, % <sup>a</sup> |
|-------|--------------------------------------------------------------------------------|-------|--------------|-----------|-----------------------|
| 1     | None                                                                           | n.a.  | 0            | 150       | >95                   |
| 2     | Rh <sub>2</sub> (O <sub>2</sub> CC <sub>7</sub> H <sub>15</sub> ) <sub>4</sub> | 5     | 100          | 55        | 33                    |
| 3     | Rh <sub>2</sub> (O <sub>2</sub> CC <sub>7</sub> H <sub>15</sub> ) <sub>4</sub> | 5     | 100          | 65        | 63                    |
| 4     | Rh <sub>2</sub> (O <sub>2</sub> CC <sub>7</sub> H <sub>15</sub> ) <sub>4</sub> | 5     | 0            | 65        | 53                    |
| 5     | Rh <sub>2</sub> (O <sub>2</sub> CC <sub>7</sub> H <sub>15</sub> ) <sub>4</sub> | 3     | 100          | 65        | 39                    |
| 6     | Rh <sub>2</sub> (O <sub>2</sub> CC <sub>7</sub> H <sub>15</sub> ) <sub>4</sub> | 5     | 100          | 80        | 90                    |
| 7     | [Ir(cod)OMe] <sub>2</sub>                                                      | 5     | 100          | 80        | 0                     |
| 8     | Rh <sub>2</sub> (esp) <sub>2</sub>                                             | 5     | 100          | 80        | 20                    |
| 9     | RhCl(PPh <sub>3</sub> ) <sub>3</sub>                                           | 5     | 100          | 80        | 0                     |
| 10    | Rh <sub>2</sub> (O <sub>2</sub> CC <sub>3</sub> F <sub>7</sub> ) <sub>4</sub>  | 5     | 100          | 80        | 66                    |
| 11    | RhCl <sub>3</sub>                                                              | 5     | 100          | 80        | 0                     |
| 12    | Rh <sub>2</sub> (O <sub>2</sub> CCH <sub>3</sub> ) <sub>4</sub>                | 5     | 100          | 80        | 0                     |
| 13    | Rh <sub>2</sub> (O <sub>2</sub> CCF <sub>3</sub> ) <sub>4</sub>                | 5     | 100          | 80        | 34                    |
| 14    | RuCl <sub>3</sub> .xH <sub>2</sub> O                                           | 5     | 100          | 65        | trace                 |
| 15    | RuCl <sub>3</sub> .xH <sub>2</sub> O                                           | 5     | 0            | 65        | trace                 |
| 16    | Rh octanoate                                                                   | 5     | 100          | 65(40h)   | 90                    |
| 17    | Co TPP                                                                         | 5     | 100          | 65        | 0                     |
| 18    | Ag(OTf)                                                                        | 5     | 100          | 65        | 0                     |
| 19    | Cu(OTf) <sub>2</sub>                                                           | 5     | 100          | 65        | 0                     |
| 20    | Rh octanoate (cyclopentane)                                                    | 5     | 100          | 75        | 59                    |
| 21    | ZnI <sub>2</sub>                                                               | 10    | 100          | 65        | 0                     |
| 22    | FeBr <sub>2</sub>                                                              | 20    | 100          | 65        | 0                     |
| 23    | AuCl                                                                           | 10    | 100          | 65        | 0                     |

<sup>a</sup> Isolated yield after Al<sub>2</sub>O<sub>3</sub> chromatography.

## 2. Optimization of Solvent.

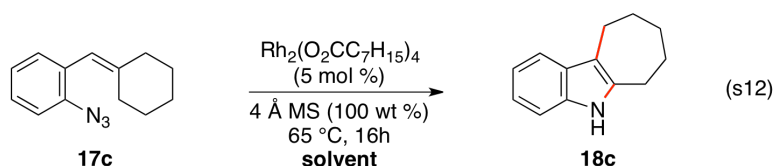

| Solvent               | PhMe | 1,2-DCE | 1,4-dioxane | DME | DMF |
|-----------------------|------|---------|-------------|-----|-----|
| Yield, % <sup>a</sup> | 63%  | 66%     | 0           | 0   | 0   |

<sup>a</sup> Isolated yield after Al<sub>2</sub>O<sub>3</sub> chromatography.

## 3. Optimized Procedure for Ring Expansion.

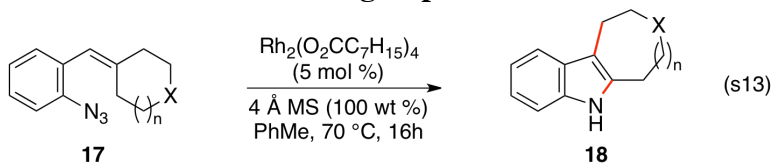

To a mixture of 0.026 g of aryl azide **17** (0.1 mmol), 100 % w/w of crushed 4 Å mol sieves, and metal salt (Rh<sub>2</sub>(O<sub>2</sub>CC<sub>7</sub>H<sub>15</sub>)<sub>4</sub>, 5 mol %) in Schlenk tube was added 0.50 mL of PhMe. The resulting mixture was heated at

80 °C for 16 h, then, the heterogenous mixture was filtered through a short pad of Al<sub>2</sub>O<sub>3</sub>. The filtrate was concentrated *in vacuo* to afford analytically pure indole.

#### 4. Scope and Limitations of Ring Expansion.

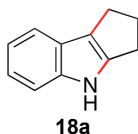

**Indole 18a.**<sup>11</sup> The general procedure was followed using 0.035 g of styryl azide **17a** (0.189 mmol) and 0.007 g of Rh<sub>2</sub>(O<sub>2</sub>CC<sub>7</sub>H<sub>15</sub>)<sub>4</sub> (0.009 mmol) in 0.6 mL of PhMe. Filtration by Al<sub>2</sub>O<sub>3</sub> afforded analytically pure compound **18a** (0.029 g, 98%). Indole **18a** was previously reported by Tan and Hartwig.<sup>11</sup> mp 58 - 61 °C; <sup>1</sup>H NMR (500 MHz, CDCl<sub>3</sub>) δ 7.74 (s, 1H), 7.47 – 7.49 (m, 1H), 7.29 – 7.31 (m, 1H), 7.12 – 7.14 (m, 2H), 2.86 -2.89 (m, 4H), 2.56 – 2.59 (m, 2H); <sup>13</sup>C NMR (125 MHz, CDCl<sub>3</sub>) δ 143.8 (C), 141.0 (C), 124.8 (C), 120.5 (CH), 119.8 (C), 119.5 (CH), 118.5 (CH), 111.4 (CH), 28.7 (CH<sub>2</sub>), 25.9 (CH<sub>2</sub>), 24.5 (CH<sub>2</sub>); IR (thin film): 3400, 2951, 2853, 1467, 1313, 913, 736 cm<sup>-1</sup>.

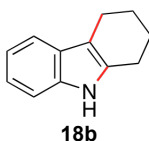

**Indole 18b.**<sup>13</sup> The general procedure was followed using 0.055 g of styryl azide **17b** (0.276 mmol) and 0.011 g of Rh<sub>2</sub>(O<sub>2</sub>CC<sub>7</sub>H<sub>15</sub>)<sub>4</sub> (0.014 mmol) in 0.7 mL of PhMe. Filtration by Al<sub>2</sub>O<sub>3</sub> afforded analytically pure compound **18b** (0.044 g, 93%). The spectral data for **18b** matched that reported by Leogane and Lebel:<sup>13</sup> <sup>1</sup>H NMR (500 MHz, CDCl<sub>3</sub>) δ 7.64 (s, 1H), 7.48 (d, *J* = 7.5 Hz, 1H), 7.28 (d, *J* = 7.5 Hz, 1H), 7.08 – 7.15 (m, 2H), 2.73 (t, *J* = 6.0 Hz, 4H), 1.87 – 1.96 (m, 4H); <sup>13</sup>C NMR (125 MHz, CDCl<sub>3</sub>) δ 135.7 (C), 134.1 (C), 127.9 (C), 121.0 (CH), 119.1 (CH), 117.7 (CH), 110.4 (CH), 110.2 (C), 23.34 (CH<sub>2</sub>), 23.26 (CH<sub>2</sub>), 21.0 (CH<sub>2</sub>) one overlapping aliphatic C not distinguishable; IR (thin film): 3397, 1667, 1603, 1497, 1456, 1276, 911, 749 cm<sup>-1</sup>.

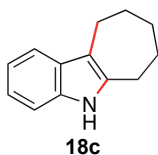

**Indole 18c.**<sup>14</sup> The general procedure was followed using 0.051 g of styryl azide **17c** (0.239 mmol) and 0.009 g of Rh<sub>2</sub>(O<sub>2</sub>CC<sub>7</sub>H<sub>15</sub>)<sub>4</sub> (0.012 mmol) in 0.6 mL of PhMe. Filtration by Al<sub>2</sub>O<sub>3</sub> afforded analytically pure compound **18c** (0.041 g, 93%). The spectral data for **18c** matched that reported by Banwell and co-workers:<sup>14</sup> mp 140 - 142 °C; <sup>1</sup>H NMR (500 MHz, CDCl<sub>3</sub>) δ 7.61 (s, 1H), 7.15 – 7.53 (m, 1H), 7.26 – 7.27 (m, 1H), 7.11 – 7.15 (m, 2H), 2.82 -2.87 (m, 4H), 1.91 – 1.94 (m, 2H), 1.81 – 1.83 (m, 4H); <sup>13</sup>C NMR (125 MHz, CDCl<sub>3</sub>) δ 137.5 (C), 134.3 (C), 129.3 (C), 120.6 (CH), 119.1 (CH), 117.7 (CH), 113.8 (C), 110.3 (CH), 31.9 (CH<sub>2</sub>), 29.6 (CH<sub>2</sub>), 28.8 (CH<sub>2</sub>), 27.6 (CH<sub>2</sub>), 24.7 (CH<sub>2</sub>); IR (thin film): 3391, 2914, 2844, 1465, 1438, 913, 743 cm<sup>-1</sup>.

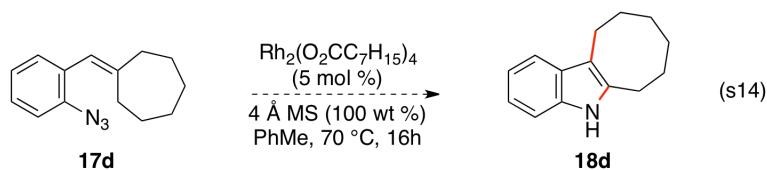

**Indole 18d.** The general procedure was followed using 0.046 g of styryl azide **17d** (0.203 mmol) and 0.008 g of  $\text{Rh}_2(\text{O}_2\text{CC}_7\text{H}_{15})_4$  (0.010 mmol) in 0.6 mL of PhMe. Analysis of the reaction progress using  $^1\text{H}$  NMR spectroscopy revealed that 18% of indole **18d** formed and 35% starting of aryl azide **17d** remained.

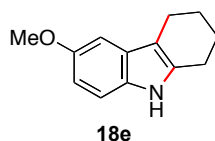

**Indole 18e.** The general procedure was followed using 0.061 g of styryl azide **17e** (0.266 mmol) and 0.010 g of  $\text{Rh}_2(\text{O}_2\text{CC}_7\text{H}_{15})_4$  (0.013 mmol) in 0.7 mL of PhMe. Filtration by  $\text{Al}_2\text{O}_3$  afforded analytically pure compound **18e** (0.054 g, 100%). Spectral data for **18e**:  $^1\text{H}$  NMR (500 MHz,  $\text{CDCl}_3$ )  $\delta$  7.56 (s, 1H), 7.16 (d,  $J = 9.0$  Hz, 1H), 6.97(d,  $J = 2.5$  Hz, 1H), 6.81 (dd,  $J = 2.5$  Hz, 9.0 Hz, 1H), 3.89 (s, 3H), 2.70 – 2.72 (m, 4H), 1.89 – 1.95 (m, 4H);  $^{13}\text{C}$  NMR (125 MHz,  $\text{CDCl}_3$ )  $\delta$  153.9 (C), 135.2 (C), 130.8 (C), 128.2 (C), 111.0 (CH), 110.5 (CH), 110.0 (C), 100.4 (CH), 56.0 ( $\text{CH}_3$ ), 23.38 ( $\text{CH}_2$ ), 23.27 ( $\text{CH}_2$ ), 21.0 ( $\text{CH}_2$ ) one overlapping aliphatic carbon signal not distinguishable; IR (thin film): 3281, 2936, 1659, 1492, 1274, 1214, 1030, 732  $\text{cm}^{-1}$ . HRMS (EI)  $m/z$  calcd for  $\text{C}_{13}\text{H}_{15}\text{ON}$  ( $\text{M}$ ) $^+$  201.11537, found 201.11616.

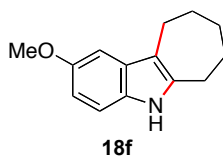

**Indole 18f.** The general procedure was followed using 0.045 g of styryl azide **17f** (0.201 mmol) and 0.008 g of  $\text{Rh}_2(\text{O}_2\text{CC}_7\text{H}_{15})_4$  (0.010 mmol) in 0.5 mL of PhMe. Filtration by  $\text{Al}_2\text{O}_3$  afforded analytically pure compound **18e** (0.039 g, 100%). mp 42 - 46  $^\circ\text{C}$ ; Spectral data for **18f**:  $^1\text{H}$  NMR (500 MHz,  $\text{CDCl}_3$ )  $\delta$  7.58 (s, 1H), 7.14 (d,  $J = 8.5$  Hz, 1H), 6.97(d,  $J = 2.5$  Hz, 1H), 6.79 (dd,  $J = 2.5$  Hz, 8.5 Hz, 1H), 3.89 (s, 3H), 2.79 – 2.81(m, 4H), 1.90 – 1.92 (m, 2H), 1.79 – 1.81 (m, 4H);  $^{13}\text{C}$  NMR (125 MHz,  $\text{CDCl}_3$ )  $\delta$  153.9 (C), 138.6 (C), 129.6 (C), 129.4 (C), 113.6 (C), 110.9 (CH), 110.4 (CH), 100.1 (CH), 56.0 ( $\text{CH}_3$ ), 31.9 ( $\text{CH}_2$ ), 29.7 ( $\text{CH}_2$ ), 28.8 ( $\text{CH}_2$ ), 27.6 ( $\text{CH}_2$ ), 24.8 ( $\text{CH}_2$ ); IR (thin film): 3401, 2916, 1625, 1483, 1452, 913, 745  $\text{cm}^{-1}$ . HRMS (EI)  $m/z$  calcd for  $\text{C}_{14}\text{H}_{17}\text{ON}$  ( $\text{M}$ ) $^+$  215.13102, found 215.13248.

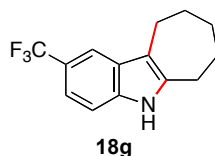

**Indole 18g.** The general procedure was followed using 0.027 g of styryl azide **17g** (0.009 mmol) and 0.004 g of  $\text{Rh}_2(\text{O}_2\text{CC}_7\text{H}_{15})_4$  (0.005 mmol) in 0.5 mL of PhMe. Filtration by  $\text{Al}_2\text{O}_3$  afforded analytically pure compound **18g** (0.021 g, 88%). Spectral data for **18g**:  $^1\text{H}$  NMR (500 MHz,  $\text{CDCl}_3$ )  $\delta$  7.89 (s, 1H), 7.76 (s, 1H), 7.29 – 7.34 (m, 2H), 2.82 – 2.86 (m, 4H), 1.90 – 1.94 (m, 2H), 1.76 – 1.82 (m, 4H);  $^{13}\text{C}$  NMR (125 MHz,  $\text{CDCl}_3$ )  $\delta$  139.3 (C), 135.6 (C), 128.7 (C), 125.6 (q,  $J_{\text{CF}} = 270.1$  Hz, C), 121.4 (q,  $J_{\text{CF}} = 31.3$  Hz, C), 117.4 (q,  $J_{\text{CF}} = 3.6$  Hz, CH), 115.4 (q,  $J_{\text{CF}} = 3.5$  Hz, CH), 114.7 (C), 110.2 (CH), 31.6 ( $\text{CH}_2$ ), 29.6 ( $\text{CH}_2$ ), 28.5 ( $\text{CH}_2$ ), 27.4 ( $\text{CH}_2$ ), 24.6 ( $\text{CH}_2$ );

$^{19}\text{F}$  NMR ( $\text{CDCl}_3$ , 282 MHz)  $\delta$  -60.66; IR (thin film): 3474, 3419, 2921, 1626, 1463, 1327, 1108, 1050, 763  $\text{cm}^{-1}$ . HRMS (EI)  $m/z$  calcd for  $\text{C}_{14}\text{H}_{14}\text{F}_3\text{N}$  ( $\text{M}$ ) $^+$  253.10783, found 253.10944.

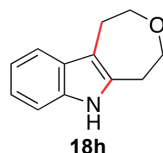

**Indole 18h.** The general procedure was followed using 0.057 g of styryl azide **17h** (0.265 mmol) and 0.010 g of  $\text{Rh}_2(\text{O}_2\text{CC}_7\text{H}_{15})_4$  (0.013 mmol) in 0.6 mL of PhMe. Filtration by  $\text{Al}_2\text{O}_3$  afforded analytically pure compound **18h** (0.048 g, 97%). mp 116 - 119  $^\circ\text{C}$ ; Spectral data for **18h**:  $^1\text{H}$  NMR (500 MHz,  $\text{CDCl}_3$ )  $\delta$  7.85 (s, 1H), 7.49 (d,  $J$  = 7.5 Hz, 1H), 7.28 (d,  $J$  = 7.5 Hz, 1H), 7.12 - 7.18 (m, 2H), 3.97 - 4.02 (m, 4H), 3.00 - 3.03 (m, 4H);  $^{13}\text{C}$  NMR (125 MHz,  $\text{CDCl}_3$ )  $\delta$  135.5 (C), 134.8 (C), 128.9 (C), 121.2 (CH), 119.4 (CH), 117.8 (CH), 112.4 (C), 110.4 (CH), 73.1 ( $\text{CH}_2$ ), 70.7 ( $\text{CH}_2$ ), 32.2 ( $\text{CH}_2$ ), 27.6 ( $\text{CH}_2$ ); IR (thin film): 3400, 3294, 2936, 1464, 1113, 913  $\text{cm}^{-1}$ . HRMS (EI)  $m/z$  calcd for  $\text{C}_{12}\text{H}_{13}\text{ON}$  ( $\text{M}$ ) $^+$  187.09972, found 187.10060.

## V. Mechanistic Experiments

### A. Synthesis of Aryl Azides 27.

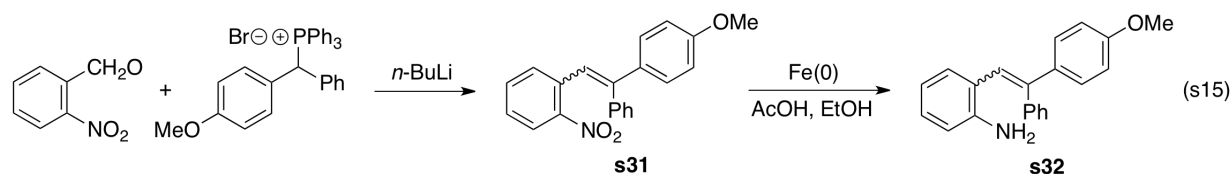

**Styrene s31.** To a solution of 10.4 g of the phosphonium salt (19.3 mmol) in 100 mL of THF at  $-78$   $^\circ\text{C}$ , was added 8.5 mL of  $n$ -BuLi (2.5 M in hexanes, 21.2 mmol) dropwise. After stirring for 1 h at  $-78$   $^\circ\text{C}$ , the mixture was warmed to room temperature and stirred additional half an hour. Then 2.65 g of 2-nitrobenzaldehyde (17.5 mmol) was added, and the mixture was heated to reflux. After 16 h, the reaction mixture was diluted with 50 mL of water and extracted with  $\text{CH}_2\text{Cl}_2$  ( $3 \times 30$  mL). The resulting organic phase was washed with 60 mL of brine and dried over  $\text{Na}_2\text{SO}_4$ . The mixture was filtered and the filtrate was concentrated *in vacuo* to afford styrene **s31**, which was carried on to the subsequent Fe-mediated reduction without any additional purification.

**Aniline s32.** To a solution of nitro-substituted styrene **s31** in 40 mL of AcOH and 40 mL of EtOH was added 8.6 g of Fe powder (154.4 mmol). The resultant mixture was heated to reflux at  $80$   $^\circ\text{C}$ . After 16 h, the reaction mixture was cooled down to ambient temperature. Once cool, the resulting mixture was filtered through a pad of Celite. The filtrate was diluted with 80 mL of water and washed with  $3 \times 30$  mL of dichloromethane. The resulting organic phase was washed with 50 mL of brine and dried over  $\text{Na}_2\text{SO}_4$ . The resulting mixture was filtered, and the filtrate was concentrated *in vacuo*. Purification by MPLC (10:1 hexanes:EtOAc) afforded the product as a yellow viscous oil as an 67:33 mixture of *E*- and *Z*-isomers (1.37 g, 24%, two steps): Spectral data for the major (*E*) isomer:  $^1\text{H}$  NMR (500 MHz,  $\text{CDCl}_3$ )  $\delta$  7.29 - 7.39 (m, 4H), 7.17 - 7.19 (m, 1H), 7.10 (d,  $J$  = 8.5 Hz, 2H), 6.89 (d,  $J$  = 8.5 Hz, 1H), 6.84 (d,  $J$  = 7.5 Hz, 1H), 6.74 - 6.80 (m, 4H), 6.53 (t,  $J$  = 7.5 Hz, 1H), 3.80 (s, 3H), *N-H peak not observed*;  $^{13}\text{C}$  NMR (125 MHz,  $\text{CDCl}_3$ )  $\delta$  144.5 (C), 143.8 (C), 143.6 (C), 132.3 (C), 131.7 (CH), 130.4 (CH), 128.25 (CH), 128.19 (CH), 127.9 (CH), 127.6 (CH), 123.93 (C), 123.90 (C), 123.8 (CH), 118.3 (CH), 115.5 (CH), 113.6 (CH), 55.2 ( $\text{CH}_3$ ); Selected spectral data for the minor (*Z*) isomer:  $^1\text{H}$  NMR (500 MHz,  $\text{CDCl}_3$ )  $\delta$  7.29 - 7.39 (m, 4H), 7.24 - 7.26 (m, 3H), 6.96 - 7.02 (m, 3H), 6.64 - 6.66 (m, 3H),

6.50 (t,  $J = 7.5$  Hz, 1H), 3.84 (s, 3H), *N-H peak not available*;  $^{13}\text{C}$  NMR (125 MHz,  $\text{CDCl}_3$ )  $\delta$  144.6 (C), 140.3 (C), 136.0 (C), 130.51 (CH), 130.43 (CH), 129.3 (CH), 127.8 (CH), 127.4 (CH), 122.8 (CH), 118.2 (CH), 115.4 (CH), 55.4 ( $\text{CH}_3$ ) these are the only visible peaks; IR (thin film): 3462, 3375, 1739, 1605, 1508, 1242, 1176, 1031, 749  $\text{cm}^{-1}$ .

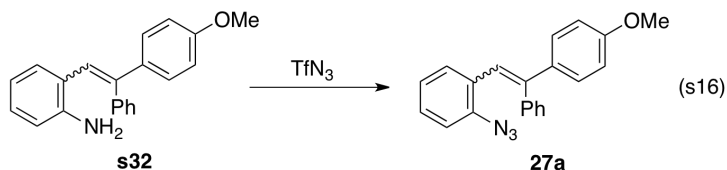

**Aryl Azide 27a.** To a solution of 0.82 g of aniline **s32** (2.7 mmol) in 5 mL of  $\text{CH}_2\text{Cl}_2$  was added subsequently 24 mg of  $\text{CuSO}_4$ , 1.2 mL of  $\text{Et}_3\text{N}$ , freshly prepared triflyl azide (9 mmol) in 15 mL of  $\text{CH}_2\text{Cl}_2$ , 1 mL of water and 2 mL of MeOH. The resulting mixture was stirred at room temperature. After 16 h., the reaction mixture was diluted with 15 mL of  $\text{CH}_2\text{Cl}_2$ , and the resulting mixture was neutralized by the addition of a saturated aq. soln. of  $\text{NaHCO}_3$ . Once pH 7 was reached, the resulting mixture was washed with  $3 \times 10$  mL of  $\text{CH}_2\text{Cl}_2$ . The resulting organic phase was washed with 20 mL of brine and dried over  $\text{Na}_2\text{SO}_4$ . After filtration, the filtrate was concentrated *in vacuo*. Purification by MPLC (10:1 hexane:EtOAc) afforded the product as a yellow viscous oil as an 69:31 mixture of *E*- and *Z*-isomers (0.42 g, 48%): Selected spectral data for the major (*E*) isomer:  $^1\text{H}$  NMR (500 MHz,  $\text{CDCl}_3$ )  $\delta$  7.27 – 7.36 (m, 4H), 7.12 – 7.17 (m, 2H), 7.08 (d,  $J = 9.0$  Hz, 2H), 6.87 – 6.88 (m, 2H), 6.80 – 6.83 (m, 3H), 3.82 (s, 3H);  $^{13}\text{C}$  NMR (125 MHz,  $\text{CDCl}_3$ )  $\delta$  159.0 (C), 143.8 (C), 143.5 (C), 138.6 (C), 132.2 (C), 129.8 (C), 131.8 (CH), 130.7 (CH), 129.2 (CH), 128.37 (CH), 128.18 (CH), 128.11 (CH), 127.7 (CH), 124.1 (CH), 118.2 (CH), 113.8 (CH), 55.2 ( $\text{CH}_3$ ); Selected spectral data for the minor (*Z*) isomer:  $^1\text{H}$  NMR (500 MHz,  $\text{CDCl}_3$ )  $\delta$  7.27 – 7.36 (m, 5H), 7.12 – 7.17 (m, 4H), 6.95 – 6.96 (m, 3H), 6.77 – 6.78 (m, 2H), 3.83 (s, 3H);  $^{13}\text{C}$  NMR (125 MHz,  $\text{CDCl}_3$ )  $\delta$  159.5 (C), 143.7 (C), 140.2 (C), 138.5 (C), 135.8 (C), 129.7 (C), 130.72 (CH), 130.58 (CH), 127.94 (CH), 127.82 (CH), 127.4 (CH), 124.0 (CH), 122.5 (CH), 121.3 (CH), 118.1 (CH), 113.6 (CH), 55.4 ( $\text{CH}_3$ ); IR (thin film): 2117, 2085, 1738, 1604, 1509, 1289, 1246, 1176, 1034, 751  $\text{cm}^{-1}$ .

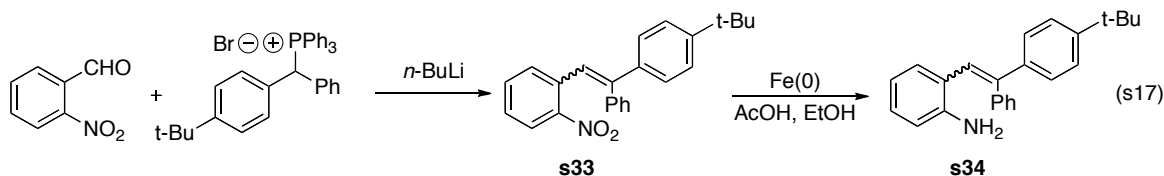

**Styrene s33.** To a solution of 10.8 g of the phosphonium salt (19.1 mmol) in 60 mL of THF at  $-78$   $^\circ\text{C}$ , was added 8.4 mL of *n*-BuLi (2.5 M in hexanes, 21.01 mmol) dropwise. After stirring for 1 h at  $-78$   $^\circ\text{C}$ , the mixture was warmed to room temperature and stirred additional half an hour. Then 2.69 g of 2-nitrobenzaldehyde (19.1 mmol) was added, and the mixture was heated to reflux. After 16 h, the reaction mixture was diluted with 50 mL of water and extracted with  $\text{CH}_2\text{Cl}_2$  ( $3 \times 30$  mL). The resulting organic phase was washed with 60 mL of brine and dried over  $\text{Na}_2\text{SO}_4$ . The mixture was filtered and the filtrate was concentrated *in vacuo* to afford styrene **s35**, which was carried on to the subsequent Fe-mediated reduction without any additional purification.

**Aniline s34.** To a solution of nitro-substituted styrene **s33** in 40 mL of AcOH and 40 mL of EtOH was added 8.6 g of Fe powder (152.8 mmol). The resultant mixture was heated to reflux at  $80$   $^\circ\text{C}$ . After 16 h, the reaction mixture was cooled down to ambient temperature. Once cool, the resulting mixture was filtered through a pad of Celite. The filtrate was diluted with 80 mL of water and washed with  $3 \times 30$  mL of dichloromethane. The resulting organic phase was washed with 50 mL of brine and dried over  $\text{Na}_2\text{SO}_4$ . The resulting mixture was

filtered, and the filtrate was concentrated in *vacuo*. Purification by MPLC (10:1 hexanes:EtOAc) afforded the product as a yellow solid (1.5 g, 24%, two steps); Spectral data for the major isomer:  $^1\text{H}$  NMR (500 MHz,  $\text{CDCl}_3$ )  $\delta$  7.37 – 7.39 (m, 2H), 7.31 – 7.33 (m, 2H), 7.25 – 7.27 (m, 3H), 7.19 – 7.21 (m, 2H), 6.97 – 7.00 (m, 1H), 6.84 (s, 1H), 6.77 (d,  $J = 8.0$  Hz, 1H), 6.65 (d,  $J = 8.0$  Hz, 1H), 6.51 (t,  $J = 7.5$  Hz, 1H), 3.74 (br, 2H), 1.37 (s, 9H);  $^{13}\text{C}$  NMR (125 MHz,  $\text{CDCl}_3$ )  $\delta$  150.8 (C), 144.7 (C), 143.9 (C), 140.4 (C), 140.2 (C), 130.53 (CH), 130.43 (CH), 128.2 (CH), 127.9 (CH), 127.7 (CH), 127.3 (CH), 125.2 (CH), 123.7 (CH), 118.2 (CH), 115.4 (CH), 34.6 (C), 31.4 ( $\text{CH}_3$ ); IR (thin film): 3379, 1617, 1246, 905, 726, 701, 649  $\text{cm}^{-1}$ .

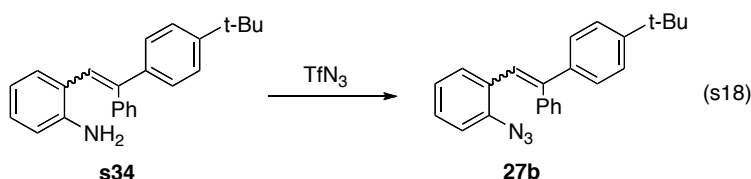

**Aryl Azide 27b.** To a solution of 1.2 g of aniline **s34** (3.8 mmol) in 5 mL of  $\text{CH}_2\text{Cl}_2$  was added subsequently 32 mg of  $\text{CuSO}_4$ , 1.6 mL of  $\text{Et}_3\text{N}$ , freshly prepared triflyl azide (12 mmol) in 15 mL of  $\text{CH}_2\text{Cl}_2$ , 1 mL of water and 2 mL of MeOH. The resulting mixture was stirred at room temperature. After 16 h, the reaction mixture was diluted with 15 mL of  $\text{CH}_2\text{Cl}_2$ , and the resulting mixture was neutralized by the addition of a saturated aq. soln. of  $\text{NaHCO}_3$ . Once pH 7 was reached, the resulting mixture was washed with  $3 \times 10$  mL of  $\text{CH}_2\text{Cl}_2$ . The resulting organic phase was washed with 20 mL of brine and dried over  $\text{Na}_2\text{SO}_4$ . After filtration, the filtrate was concentrated *in vacuo*. Purification by MPLC (100:1 hexane:EtOAc) afforded the product as a yellow solid as an 1:1 mixture of *E*- and *Z*-isomers (0.88 g, 66%): Spectral data for *E*- and *Z*- isomers:  $^1\text{H}$  NMR (500 MHz,  $\text{CDCl}_3$ )  $\delta$  7.27 – 7.36 (m, 14H), 7.11 – 7.17 (m, 6H), 7.06 – 7.07 (m, 2H), 7.02 (s, 2H), 6.76 – 6.82 (m, 4H), 1.33 – 1.34 (m, 18H);  $^{13}\text{C}$  NMR (125 MHz,  $\text{CDCl}_3$ )  $\delta$  150.9 (C), 143.4 (C), 140.1 (C), 138.6 (C), 136.8 (C), 130.78 (CH), 130.73 (CH), 130.56 (CH), 130.1 (CH), 129.70 (C), 129.63 (C), 128.35 (CH), 128.15 (CH), 128.08 (CH), 127.93 (CH), 127.90 (CH), 127.67 (CH), 127.55 (CH), 127.39 (CH), 125.20 (CH), 125.14 (CH), 124.01 (CH), 123.98 (CH), 122.7 (CH), 122.3 (CH), 118.1 (CH), 34.6 ( $\text{CH}_3$ ), 31.4 ( $\text{CH}_3$ ) *only distinguishable peaks*; IR (thin film): 2117, 2085, 1796, 1730, 1287, 908, 733  $\text{cm}^{-1}$ . HRMS (EI)  $m/z$  calcd for  $\text{C}_{24}\text{H}_{23}\text{N}_3$  ( $\text{M}$ ) $^+$  353.18920, found 353.19017.

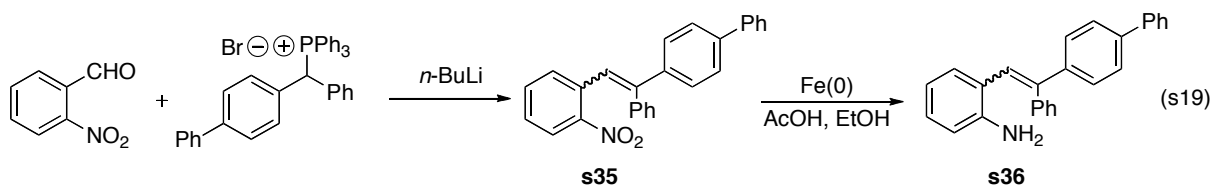

**Styrene s35.** To a solution of 9.6 g of the phosphonium salt (16.4 mmol) in 60 mL of THF at  $-78$   $^\circ\text{C}$ , was added 7.2 mL of *n*-BuLi (2.5 M in hexanes, 18.1 mmol) dropwise. After stirring for 1 h at  $-78$   $^\circ\text{C}$ , the mixture was warmed to room temperature and stirred additional half an hour. Then 2.48 g of 2-nitrobenzaldehyde (16.4 mmol) was added, and the mixture was heated to reflux. After 16 h, the reaction mixture was diluted with 50 mL of water and extracted with  $\text{CH}_2\text{Cl}_2$  ( $3 \times 30$  mL). The resulting organic phase was washed with 60 mL of brine and dried over  $\text{Na}_2\text{SO}_4$ . The mixture was filtered and the filtrate was concentrated *in vacuo* to afford styrene **s33**, which was carried on to the subsequent Fe-mediated reduction without any additional purification.

**Aniline s36.** To a solution of nitro-substituted styrene **s35** in 30 mL of AcOH and 30 mL of EtOH was added 7.3 g of Fe powder (131.2 mmol). The resultant mixture was heated to reflux at  $80$   $^\circ\text{C}$ . After 16 h, the reaction

mixture was cooled down to ambient temperature. Once cool, the resulting mixture was filtered through a pad of Celite. The filtrate was diluted with 70 mL of water and washed with 3 × 30 mL of dichloromethane. The resulting organic phase was washed with 50 mL of brine and dried over Na<sub>2</sub>SO<sub>4</sub>. The resulting mixture was filtered, and the filtrate was concentrated *in vacuo*. Purification by MPLC (10:1 hexanes:EtOAc) afforded the product as a yellow solid (602 mg, 11%, two steps); Spectral data for the major isomer: <sup>1</sup>H NMR (500 MHz, CDCl<sub>3</sub>) δ 7.63 – 7.70 (m, 4H), 7.47 – 7.56 (m, 5H), 7.41 – 7.43 (m, 1H), 7.27 – 7.34 (m, 4H), 7.03 – 7.07 (m, 1H), 6.95 (s, 1H), 6.86 (d, J = 7.5 Hz, 1H), 6.70 – 6.71 (m, 1H), 6.56 – 6.60 (m, 1H), 3.92 (br, 2H); <sup>13</sup>C NMR (125 MHz, CDCl<sub>3</sub>) δ 144.8 (C), 143.7 (C), 142.4 (C), 140.8 (C), 140.5 (C), 131.1 (CH), 130.63 (CH), 130.48 (CH), 128.9 (CH), 128.6 (CH), 128.38 (CH), 128.20 (CH), 127.6 (CH), 127.12 (CH), 127.01 (CH), 124.4 (CH), 123.7 (C), 118.3 (CH), 115.6 (CH); IR (thin film): 3457, 1739, 1486, 1454, 1366, 1216, 905 cm<sup>-1</sup>.

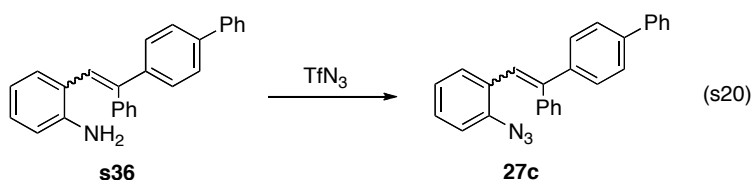

**Aryl Azide 27c.** To a solution of 0.55 g of aniline **s36** (1.6 mmol) in 5 mL of CH<sub>2</sub>Cl<sub>2</sub> was added subsequently 16 mg of CuSO<sub>4</sub>, 0.8 mL of Et<sub>3</sub>N, freshly prepared triflyl azide (6 mmol) in 15 mL of CH<sub>2</sub>Cl<sub>2</sub>, 1 mL of water and 2 mL of MeOH. The resulting mixture was stirred at room temperature. After 16 h, the reaction mixture was diluted with 15 mL of CH<sub>2</sub>Cl<sub>2</sub>, and the resulting mixture was neutralized by the addition of a saturated aq. soln. of NaHCO<sub>3</sub>. Once pH 7 was reached, the resulting mixture was washed with 3 × 10 mL of CH<sub>2</sub>Cl<sub>2</sub>. The resulting organic phase was washed with 20 mL of brine and dried over Na<sub>2</sub>SO<sub>4</sub>. After filtration, the filtrate was concentrated *in vacuo*. Purification by MPLC (100:1 hexane:EtOAc) afforded the product as a pale solid (0.26 g, 43%). Spectral data for *E*- and *Z* isomer mixture: <sup>1</sup>H NMR (500 MHz, CDCl<sub>3</sub>) δ 7.63 – 7.66 (m, 4H), 7.54 – 7.59 (m, 4H), 7.10 – 7.49 (m, 25H), 7.06 (s, 1H), 6.91 – 6.93 (m, 1H), 6.78 – 6.84 (m, 3H); <sup>13</sup>C NMR (125 MHz, CDCl<sub>3</sub>) δ 143.8 (C), 143.7 (C), 143.2 (C), 142.1 (C), 140.7 (C), 140.6 (C), 140.56 (C), 140.1 (C), 140.0 (C), 139.0 (C), 138.7 (C), 131.1 (CH), 130.84 (CH), 130.76 (CH), 130.6 (CH), 129.53, 129.46, 128.8 (CH), 128.5 (CH), 128.4 (CH), 128.3 (CH), 128.2 (CH), 127.9 (CH), 127.6 (CH), 127.4 (CH), 127.4 (CH), 127.1 (CH), 126.99 (CH), 126.94 (CH), 124.2 (CH), 124.1 (CH), 123.3 (CH), 123.0 (CH), 118.2 (CH), 118.2 (CH) *only distinguishable peaks*; IR (thin film): 2117, 2085, 1738, 1604, 1509, 1289, 1246, 1176, 1034, 751 cm<sup>-1</sup>. HRMS (EI) *m/z* calcd for C<sub>26</sub>H<sub>19</sub>N<sub>3</sub> (M)<sup>+</sup> 373.15790, found 373.15891.

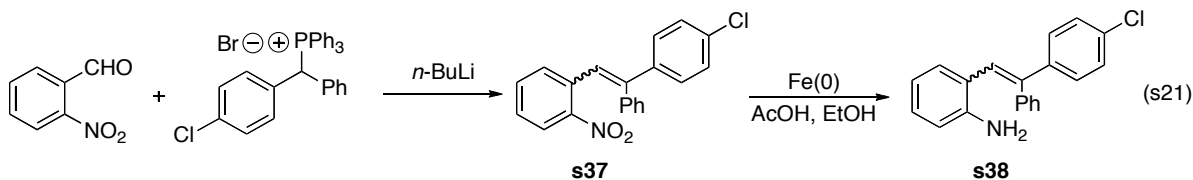

**Styrene s37.** To a solution of 8.5 g of the phosphonium salt (15.7 mmol) in 50 mL of THF at -78 °C, was added 6.9 mL of *n*-BuLi (2.5 M in hexanes, 17.3 mmol) dropwise. After stirring for 1 h at -78 °C, the mixture was warmed to room temperature and stirred additional half an hour. Then 2.4 g of 2-nitrobenzaldehyde (15.7 mmol) was added, and the mixture was heated to reflux. After 16 h, the reaction mixture was diluted with 50 mL of water and extracted with CH<sub>2</sub>Cl<sub>2</sub> (3 × 30 mL). The resulting organic phase was washed with 60 mL of brine and dried over Na<sub>2</sub>SO<sub>4</sub>. The mixture was filtered and the filtrate was concentrated *in vacuo* to afford styrene **s37**, which was carried on to the subsequent Fe-mediated reduction without any additional purification.

**Aniline s38.** To a solution of nitro-substituted styrene **s37** in 40 mL of AcOH and 40 mL of EtOH was added 7.1 g of Fe powder (125.6 mmol). The resultant mixture was heated to reflux at 80 °C. After 16 h, the reaction mixture was cooled down to ambient temperature. Once cool, the resulting mixture was filtered through a pad of Celite. The filtrate was diluted with 80 mL of water and washed with 3 × 30 mL of dichloromethane. The resulting organic phase was washed with 50 mL of brine and dried over Na<sub>2</sub>SO<sub>4</sub>. The resulting mixture was filtered, and the filtrate was concentrated in *vacuo*. Purification by MPLC (10:1 hexanes:EtOAc) afforded the product as a pale solid (1024 mg, 21%, two steps); Spectral data for the major isomer: <sup>1</sup>H NMR (500 MHz, CDCl<sub>3</sub>) δ 7.12 – 7.36 (m, 9H), 6.98 – 7.04 (m, 1H), 6.81 – 6.84 (m, 1H), 6.77 – 6.78 (m, 1H), 6.66 – 6.68 (m, 1H), 6.50 – 6.56 (m, 1H), 3.76 (br, 2H); spectral data for both the *E*- and *Z*-isomer: <sup>13</sup>C NMR (125 MHz, CDCl<sub>3</sub>) δ 144.74 (C), 144.71 (C), 143.9 (C), 143.02 (C), 142.96 (C), 141.9 (C), 139.6 (C), 138.5 (C), 133.5 (C), 133.2 (C), 131.9 (CH), 130.45 (CH), 130.35 (CH), 130.29 (CH), 129.4 (CH), 128.52 (CH), 128.38 (CH), 128.36 (CH), 128.30 (CH), 128.13 (CH), 127.9 (CH), 127.6 (CH), 125.0 (CH), 124.8 (CH), 118.34 (CH), 118.28 (CH), 115.59 (CH), 115.54 (CH); IR (thin film): 3463, 3378, 1614, 1485, 1089, 728 cm<sup>-1</sup>.

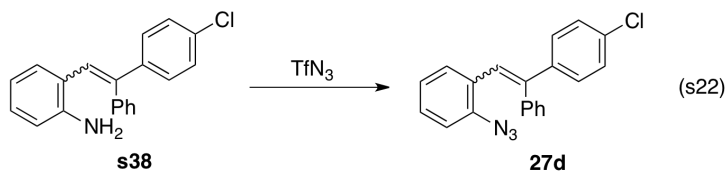

**Aryl Azide 27d.** To a solution of 0.90 g of aniline **s38** (3.0 mmol) in 5 mL of CH<sub>2</sub>Cl<sub>2</sub> was added subsequently 24 mg of CuSO<sub>4</sub>, 1.2 mL of Et<sub>3</sub>N, freshly prepared triflyl azide (9 mmol) in 15 mL of CH<sub>2</sub>Cl<sub>2</sub>, 1 mL of water and 2 mL of MeOH. The resulting mixture was stirred at room temperature. After 16 h, the reaction mixture was diluted with 15 mL of CH<sub>2</sub>Cl<sub>2</sub>, and the resulting mixture was neutralized by the addition of a saturated aq. soln. of NaHCO<sub>3</sub>. Once pH 7 was reached, the resulting mixture was washed with 3 × 10 mL of CH<sub>2</sub>Cl<sub>2</sub>. The resulting organic phase was washed with 20 mL of brine and dried over Na<sub>2</sub>SO<sub>4</sub>. After filtration, the filtrate was concentrated *in vacuo*. Purification by MPLC (100:1 hexane:EtOAc) afforded the product as a yellow viscous oil (0.44 g, 45%): Spectral data for the mixture: <sup>1</sup>H NMR (500 MHz, CDCl<sub>3</sub>) δ 7.10 – 7.37 (m, 22H), 6.96 – 7.04 (m, 2H), 6.75 – 6.84 (m, 4H); <sup>13</sup>C NMR (125 MHz, CDCl<sub>3</sub>) δ 143.0 (C), 142.7 (C), 141.6 (C), 139.6 (C), 138.78 (C), 138.74 (C), 138.5 (C), 133.7 (C), 133.4 (C), 132.0 (CH), 130.7 (CH), 130.51 (CH), 130.41 (CH), 130.1 (CH), 129.25 (CH), 129.17 (CH), 128.69 (CH), 128.55 (CH), 128.41 (CH), 128.36 (CH), 128.31 (CH), 128.0 (CH), 127.7 (CH), 126.6 (CH), 125.6 (CH), 124.24 (CH), 124.09 (CH), 123.8 (CH), 123.4 (CH), 118.30 (CH), 118.27 (CH), 118.18 (CH); IR (thin film): 2117, 2085, 1738, 1604, 1509, 1289, 1246, 1176, 1034, 751 cm<sup>-1</sup>. HRMS (EI) *m/z* calcd for C<sub>20</sub>H<sub>14</sub>N<sub>3</sub>Cl (M)<sup>+</sup> 331.08762, found 331.08665.



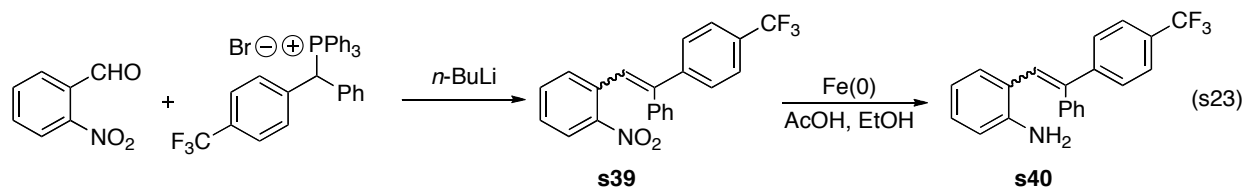

**Styrene s39.** To a solution of 3.46 g of the phosphonium salt (6 mmol) in 60 mL of THF at  $-78\text{ }^{\circ}\text{C}$ , was added 2.4 mL of *n*-BuLi (2.5 M in hexanes, 6 mmol) dropwise. After stirring for 1 h at  $-78\text{ }^{\circ}\text{C}$ , the mixture was warmed to room temperature and stirred additional half an hour. Then 0.91 g of 2-nitrobenzaldehyde (6 mmol) was added, and the mixture was heated to reflux. After 16 h, the reaction mixture was diluted with 50 mL of water and extracted with  $\text{CH}_2\text{Cl}_2$  ( $3 \times 30\text{ mL}$ ). The resulting organic phase was washed with 60 mL of brine and dried over  $\text{Na}_2\text{SO}_4$ . The mixture was filtered and the filtrate was concentrated *in vacuo* to afford styrene **s31**, which was carried on to the subsequent Fe-mediated reduction without any additional purification.

**Aniline s40.** To a solution of nitro-substituted styrene **s39** in 15 mL of AcOH and 15 mL of EtOH was added 2.7 g of Fe powder (48 mmol). The resultant mixture was heated to reflux at  $80\text{ }^{\circ}\text{C}$ . After 16 h, the reaction mixture was cooled down to ambient temperature. Once cool, the resulting mixture was filtered through a pad of Celite. The filtrate was diluted with 20 mL of water and washed with  $3 \times 10\text{ mL}$  of dichloromethane. The resulting organic phase was washed with 20 mL of brine and dried over  $\text{Na}_2\text{SO}_4$ . The resulting mixture was filtered, and the filtrate was concentrated *in vacuo*. Purification by MPLC (10:1 hexanes:EtOAc) afforded the product as a yellow solid (190 mg, 12%, two steps);  $^1\text{H NMR}$  (500 MHz;  $\text{CDCl}_3$ )  $\delta$  7.69 (d,  $J = 8.5\text{ Hz}$ , 2.4H), 7.61 (d,  $J = 8.0\text{ Hz}$ , 1.6H), 7.57 (d,  $J = 8.5\text{ Hz}$ , 2.4H), 7.45 (s, 4H), 7.42 (d,  $J = 8.0\text{ Hz}$ , 1.6H), 7.38 – 7.37 (m, 3.6H), 7.30 – 7.29 (m, 2.4H), 7.11 (t,  $J = 7.5\text{ Hz}$ , 2H), 7.01 (d,  $J = 8.0\text{ Hz}$ , 2H); 6.92 (d,  $J = 8.0\text{ Hz}$ , 1.2H), 6.84 (d,  $J = 8.0\text{ Hz}$ , 0.8H), 6.74 (dd,  $J = 8.0, 3.5\text{ Hz}$ , 2H), 6.62 (t,  $J = 8.0\text{ Hz}$ , 2H), 3.83 (br, 4H);  $^{13}\text{C NMR}$  (125 MHz,  $\text{CDCl}_3$ )  $\delta$  147.2 (C), 145.1 (C), 145.0 (C), 144.1 (C), 142.9 (C), 142.8 (C), 142.8 (C), 139.5 (C), 131.1 (CH), 130.6 (CH), 130.5 (CH), 130.4 (CH), 128.7 (CH), 128.6 (CH), 128.6 (CH), 128.5 (CH), 128.2 (CH), 128.2 (CH), 128.0 (CH), 126.4 (CH), 125.9 (CH), 125.3 (q,  $J_{\text{CF}} = 3.5\text{ Hz}$ ,  $\text{CF}_3$ ), 123.4 (C), 123.3 (C), 123.2 (C), 123.0 (C), 118.4 (CH), 118.4 (CH), 115.8 (CH), 115.7 (CH); *only distinguishable peaks*. HRMS (EI)  $m/z$  calcd for  $\text{C}_{21}\text{H}_{16}\text{F}_3\text{N}$  (M) $^+$  339.12348, found 339.12435.

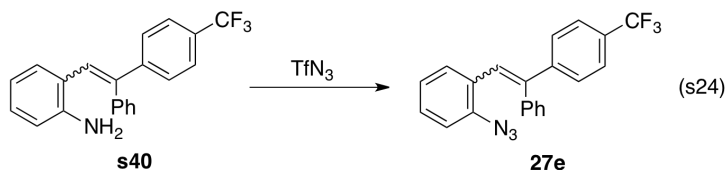

**Aryl Azide 27e.** To a solution of 0.17 g of aniline **s40** (0.5 mmol) in 5 mL of  $\text{CH}_2\text{Cl}_2$  was added subsequently 6 mg of  $\text{CuSO}_4$ , 0.3 mL of  $\text{Et}_3\text{N}$ , freshly prepared triflyl azide (2 mmol) in 5 mL of  $\text{CH}_2\text{Cl}_2$ , 1 mL of water and 2 mL of MeOH. The resulting mixture was stirred at room temperature. After 16 h, the reaction mixture was diluted with 10 mL of  $\text{CH}_2\text{Cl}_2$ , and the resulting mixture was neutralized by the addition of a saturated aq. soln. of  $\text{NaHCO}_3$ . Once pH 7 was reached, the resulting mixture was washed with  $3 \times 10\text{ mL}$  of  $\text{CH}_2\text{Cl}_2$ . The resulting organic phase was washed with 20 mL of brine and dried over  $\text{Na}_2\text{SO}_4$ . After filtration, the filtrate was concentrated *in vacuo*. Purification by MPLC (100:1 hexane:EtOAc) afforded the product as a yellow viscous oil (0.076 g, 42%);  $^1\text{H NMR}$  (500 MHz;  $\text{CDCl}_3$ )  $\delta$  7.59 (d,  $J = 8.0\text{ Hz}$ , 2.4H), 7.54 (d,  $J = 8.0\text{ Hz}$ , 1.6H), 7.46 (s, 2.4H), 7.44 (s, 1.6H), 7.36 – 7.28 (m, 8H), 7.23 – 7.10 (m, 8H), 6.81 – 6.77 (m, 4H);  $^{13}\text{C NMR}$  (125 MHz,  $\text{CDCl}_3$ )  $\delta$  146.7 (C), 144.0 (C), 142.8 (C), 142.4 (C), 139.3 (C), 138.9 (C), 131.0 (CH), 130.7 (CH), 130.5 (CH),

130.5 (C), 128.9 (C), 128.6 (CH), 128.6 (CH), 128.4 (CH), 128.2 (CH), 128.1 (CH), 128.0 (CH), 127.9 (CH), 125.3 (q,  $J = 3.5$  Hz, CF<sub>3</sub>), 125.2 (q,  $J_{CF} = 3.5$  Hz, CF<sub>3</sub>), 124.9 (CH), 124.5 (CH), 124.3 (CH), 124.1 (CH), 118.3 (CH), 118.2 (CH) *only distinguishable peaks*. IR (thin film): 1752, 1727, 1368, 1228, 1216, 750 cm<sup>-1</sup>.

## B. Syntheses of 2,3-Diarylindoles

2-Phenyl-3-arylindoles were synthesized from alkynyltrifluoroacetanilide **s41** following the method reported by Cacchi and co-workers.<sup>15</sup>

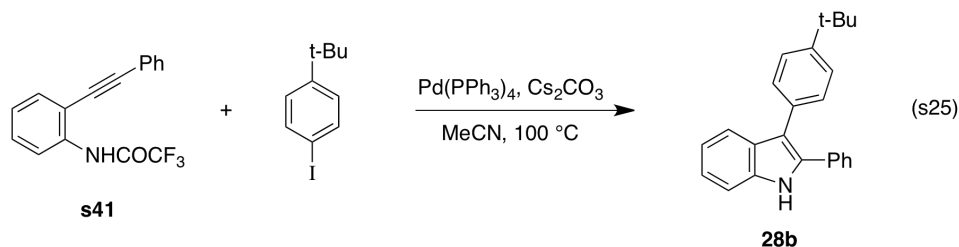

**Indole 28b.**<sup>15</sup> To a solution of 0.59 g of acetylene (2.0 mmol) in 15 mL of MeCN was added subsequently 1.43 g of Cs<sub>2</sub>CO<sub>3</sub>, 0.1 mol of Pd(PPh<sub>3</sub>)<sub>4</sub> (5 mol %), 1.14 g of 4-*tert*-butyliodobenzene (4.4 mmol). The resulting mixture was stirred at 100 °C until complete conversion (2h). After this time, the reaction mixture was cooled to room temperature, diluted with 30 mL of water and extracted with CH<sub>2</sub>Cl<sub>2</sub> (3 × 20 mL). The resulting organic phase was washed with 60 mL of brine and dried over Na<sub>2</sub>SO<sub>4</sub>. Purification by MPLC (30:1 hexane:EtOAc) afforded the product **28b** as a yellow solid (0.59 g, 91%). The spectral data matched that reported by Cacchi and co-workers:<sup>15</sup> <sup>1</sup>H NMR (500 MHz, CDCl<sub>3</sub>) δ 8.18 (br, 1H), 7.76 (d,  $J = 8.0$  Hz, 1H), 7.40 – 7.48 (m, 7H), 7.26 – 7.36 (m, 4H), 7.17 – 7.20 (m, 1H) 1.49 (s, 9H); <sup>13</sup>C NMR (125 MHz, CDCl<sub>3</sub>) δ 149.0 (C), 136.0 (C), 134.0 (C), 133.0 (C), 132.0 (C), 129.7 (CH), 129.0 (C), 128.7 (CH), 128.3 (CH), 127.6 (CH), 125.5 (CH), 122.7 (CH), 120.3 (CH), 120.0 (CH), 115.0 (C), 110.9 (CH), 34.6 (C), 31.5 (CH<sub>3</sub>); IR (thin film): 3457, 1761, 1442, 1378, 1223, 732 cm<sup>-1</sup>. HRMS (EI)  $m/z$  calcd for C<sub>24</sub>H<sub>23</sub>N (M)<sup>+</sup> 325.18404, found 325.18305.

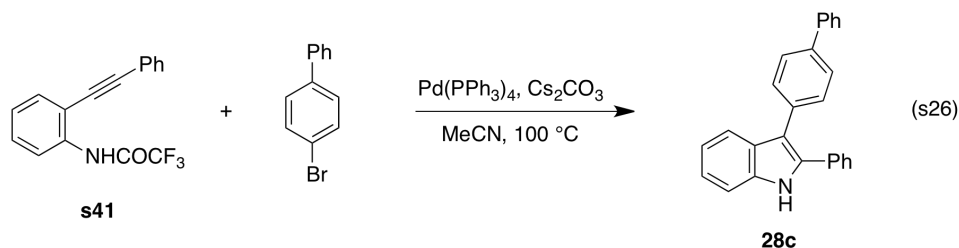

**Indole 28c.**<sup>15</sup> To a solution of 0.59 g of acetylene (2.0 mmol) in 15 mL of MeCN was added subsequently 1.43 g of Cs<sub>2</sub>CO<sub>3</sub>, 0.1 mol of Pd(PPh<sub>3</sub>)<sub>4</sub> (5 mol %), 1.03 g of 4-bromobiphenyl (4.4 mmol). The resulting mixture was stirred at 100 °C until complete conversion (2h). After this time, the reaction mixture was cooled to room temperature, diluted with 30 mL of water and extracted with CH<sub>2</sub>Cl<sub>2</sub> (3 × 20 mL). The resulting organic phase was washed with 60 mL of brine and dried over Na<sub>2</sub>SO<sub>4</sub>. Purification by MPLC (30:1 hexane:EtOAc) afforded the product **28c** as a yellow solid (0.54 g, 78%). Spectral data matched that reported by Cacchi and co-workers:<sup>15</sup> <sup>1</sup>H NMR (500 MHz, CDCl<sub>3</sub>) δ 8.25 (br, 1H), 7.78 (d,  $J = 7.5$  Hz, 1H), 7.69 (d,  $J = 8.0$  Hz, 2H), 7.65 (d,  $J = 8.0$  Hz, 2H), 7.55 (d,  $J = 7.5$  Hz, 2H), 7.45 – 7.55 (m, 5H), 7.22 – 7.39 (m, 5H), 7.19 – 7.22 (m, 1H); <sup>13</sup>C NMR (125 MHz, CDCl<sub>3</sub>) δ 141.0 (C), 138.8 (C), 136.0 (C), 134.29 (C), 134.20 (C), 132.8 (C), 130.5 (CH),

128.81 (CH), 128.76 (CH), 128.3 (CH), 127.8 (CH), 127.23 (CH), 127.18 (CH), 126.99 (CH), 122.8 (CH), 120.6 (CH), 119.8 (CH), 114.6 (C), 111.0 (CH); IR (thin film): 3415, 1770, 1455, 1248, 903, 725, 698, 649  $\text{cm}^{-1}$ . HRMS (EI)  $m/z$  calcd for  $\text{C}_{26}\text{H}_{19}\text{N}$  ( $\text{M}$ )<sup>+</sup> 345.15175, found 345.25258.

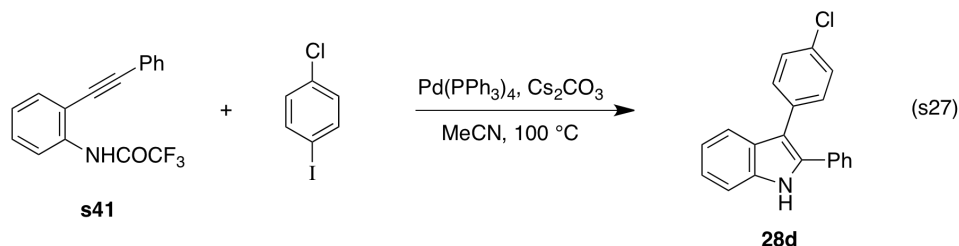

**Indole 28d.**<sup>15</sup> To a solution of 0.59 g of acetylene (2.0 mmol) in 15 mL of MeCN was added subsequently 1.43 g of  $\text{Cs}_2\text{CO}_3$ , 0.1 mol of  $\text{Pd}(\text{PPh}_3)_4$  (5 mol %), 1.05 g of 1-chloro-4-iodobenzene (4.4 mmol). The resulting mixture was stirred at 100 °C until complete conversion (2h). After this time, the reaction mixture was cooled to room temperature, diluted with 30 mL of water and extracted with  $\text{CH}_2\text{Cl}_2$  (3  $\times$  20 mL). The resulting organic phase was washed with 60 mL of brine and dried over  $\text{Na}_2\text{SO}_4$ . Purification by MPLC (30:1 hexane:EtOAc) afforded the product **28d** as a yellow solid (0.53 g, 88%). The spectral data matched that reported by Cacchi and co-workers:<sup>15</sup>  $^1\text{H}$  NMR (500 MHz,  $\text{CDCl}_3$ )  $\delta$  8.23 (br, 1H), 7.68 (d,  $J = 8.0$  Hz, 1H), 7.34 -7.45 (m, 10H), 7.29 (t,  $J = 7.5$  Hz, 1H), 7.20 – 7.23 (m, 1H);  $^{13}\text{C}$  NMR (125 MHz,  $\text{CDCl}_3$ )  $\delta$  135.9 (C), 134.4 (C), 133.7 (C), 132.4 (C), 132.1 (C), 131.4 (CH), 128.88 (CH), 128.84 (CH), 128.5 (C), 128.3 (CH), 128.0 (CH), 122.9 (CH), 120.7 (CH), 119.5 (CH), 113.8 (C), 111.1 (CH); IR (thin film): 3411, 1770, 1601, 1500, 1248, 1091, 1014, 905, 728  $\text{cm}^{-1}$ . HRMS (EI)  $m/z$  calcd for  $\text{C}_{20}\text{H}_{14}\text{NCl}$  ( $\text{M}$ )<sup>+</sup> 303.08147, found 303.08070.

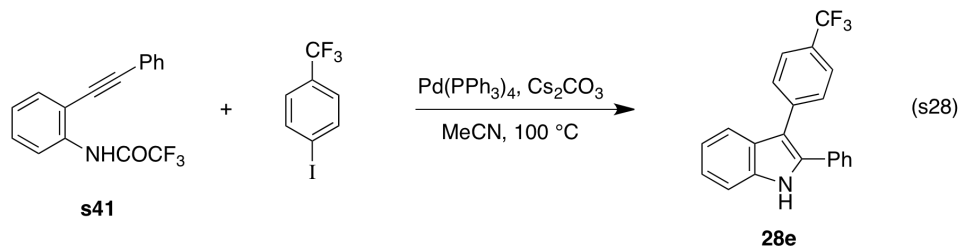

**Indole 28e.**<sup>16</sup> To a solution of 0.59 g of acetylene (2.0 mmol) in 15 mL of MeCN was added subsequently 1.43 g of  $\text{Cs}_2\text{CO}_3$ , 0.1 mol of  $\text{Pd}(\text{PPh}_3)_4$  (5 mol %), 0.97 g of 4-trifluoromethyliodobenzene (4.4 mmol). The resulting mixture was stirred at 100 °C until complete conversion (2h). After this time, the reaction mixture was cooled to room temperature, diluted with 30 mL of water and extracted with  $\text{CH}_2\text{Cl}_2$  (3  $\times$  20 mL). The resulting organic phase was washed with 60 mL of brine and dried over  $\text{Na}_2\text{SO}_4$ . Purification by MPLC (30:1 hexane:EtOAc) afforded the product **28e** as a yellow solid (0.63 g, 94%). The spectral data matched that reported by Wang and co-workers:<sup>16</sup>  $^1\text{H}$  NMR (500 MHz,  $\text{CDCl}_3$ )  $\delta$  8.29 (br, 1H), 7.71 (d,  $J = 8.0$  Hz, 1H), 7.65 (d,  $J = 8.0$  Hz, 2H), 7.57 (d,  $J = 8.0$  Hz, 2H), 7.36 – 7.47 (m, 6H), 7.29 – 7.32 (m, 1H), 7.20 – 7.24 (m, 1H);  $^{13}\text{C}$  NMR (125 MHz,  $\text{CDCl}_3$ )  $\delta$  139.1 (C), 136.0 (C), 135.0 (C), 132.2 (C), 130.2 (CH), 129.0 (CH), 128.4 (CH), 128.2 (CH), 128.1 (d,  $J_{\text{CF}} = 38.5$  Hz, CH), 125.5 (d,  $J_{\text{CF}} = 3.6$  Hz, CH), 124.5 (d,  $J_{\text{CF}} = 270.0$  Hz, C), 123.1 (C), 121.3 (C), 120.9 (CH), 119.3 (CH), 113.6 (C), 111.2 (CH); IR (thin film): 3405, 1614, 1448, 1321, 1108, 1065, 905, 850  $\text{cm}^{-1}$ . HRMS (EI)  $m/z$  calcd for  $\text{C}_{20}\text{H}_{14}\text{NF}_3$  ( $\text{M}$ )<sup>+</sup> 337.10783, found 337.10868.

### C. Intramolecular Competition Experiments.

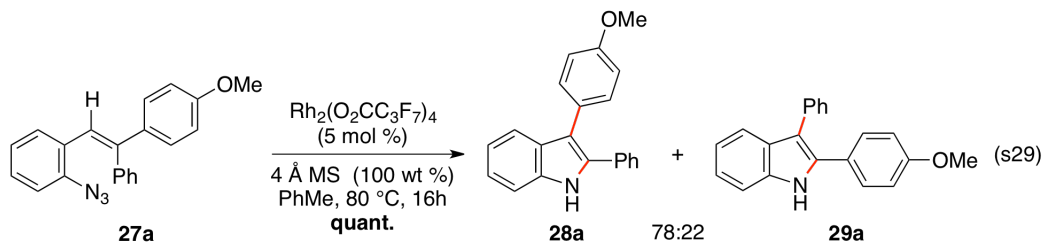

To a mixture of 0.023 g of aryl azide **27a** (0.07 mmol), 0.023 g of crushed 4 Å mol sieves, and 0.004 g of  $\text{Rh}_2(\text{O}_2\text{CC}_3\text{F}_7)_4$  (0.004 mol) in Schlenk tube was added 0.50 mL of PhMe. The resulting mixture was heated at 80 °C, after 16 h, the heterogenous mixture was filtered through a short pad of  $\text{Al}_2\text{O}_3$ . The filtrate was concentrated *in vacuo* to afford 0.021 g of a mixture of **28a** and **29a** (78:22). The resulting solid was dissolved in 1.5 mL of  $\text{CDCl}_3$ . The areas of the C–H peak on the methoxy position were compared to derive a ratio (78:22). The products were identified by comparison with published  $^1\text{H}$  NMR spectra of **28a**.<sup>17</sup>

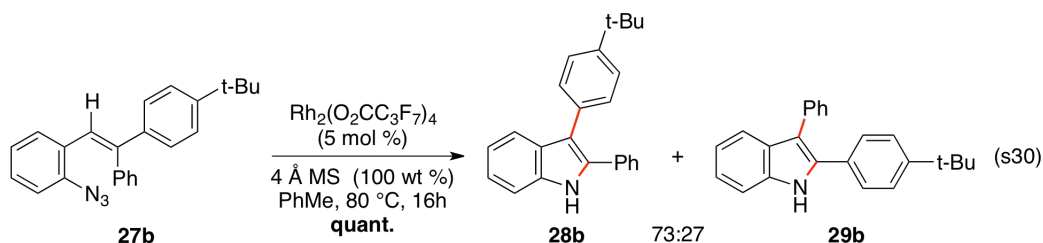

To a mixture of 0.058 g of aryl azide **27b** (0.16 mmol), 0.058 g of crushed 4 Å mol sieves, and 0.009 g of  $\text{Rh}_2(\text{O}_2\text{CC}_3\text{F}_7)_4$  (0.008 mol) in Schlenk tube was added 0.50 mL of PhMe. The resulting mixture was heated at 80 °C, after 16 h, the heterogenous mixture was filtered through a short pad of  $\text{Al}_2\text{O}_3$ . The filtrate was concentrated *in vacuo* to afford 0.053 g of a mixture of **28b** and **29b** (73:27). The resulting solid was dissolved in 1.5 mL of  $\text{CDCl}_3$ . The areas of the C–H peak on the aromatic region were compared to derive a ratio (73:27). The products were identified by comparison with  $^1\text{H}$  NMR spectra of **28b**.

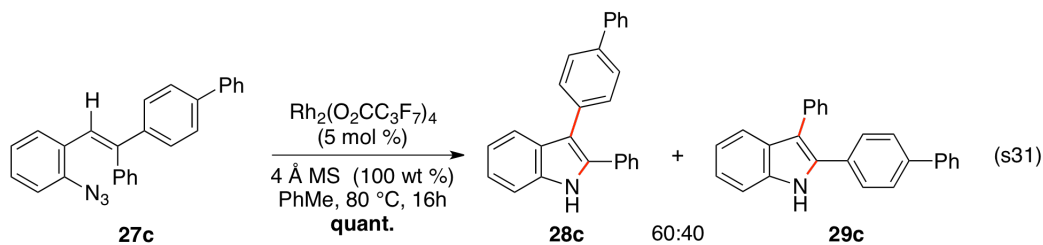

To a mixture of 0.060 g of aryl azide **27c** (0.16 mmol), 0.060 g of crushed 4 Å mol sieves, and 0.009 g of  $\text{Rh}_2(\text{O}_2\text{CC}_3\text{F}_7)_4$  (0.008 mol) in Schlenk tube was added 0.50 mL of PhMe. The resulting mixture was heated at 80 °C, after 16 h, the heterogenous mixture was filtered through a short pad of  $\text{Al}_2\text{O}_3$ . The filtrate was concentrated *in vacuo* to afford 0.054 g of a mixture of **28c** and **29c** (60:40). The resulting solid was dissolved in 1.5 mL of  $\text{CDCl}_3$ . The areas of the C–H peak on the aromatic region were compared to derive a ratio (60:40). The products were identified by comparison with  $^1\text{H}$  NMR spectra of **28c**.

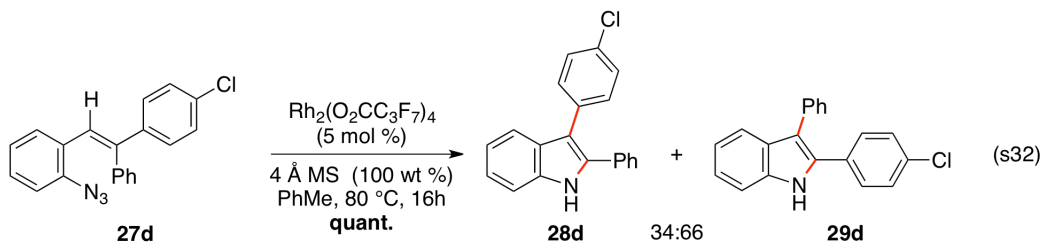

To a mixture of 0.043 g of aryl azide **27d** (0.13 mmol), 0.043 g of crushed 4 Å mol sieves, and 0.007 g of  $\text{Rh}_2(\text{O}_2\text{CC}_3\text{F}_7)_4$  (0.006 mol) in Schlenk tube was added 0.50 mL of PhMe. The resulting mixture was heated at 80 °C, after 16 h, the heterogenous mixture was filtered through a short pad of  $\text{Al}_2\text{O}_3$ . The filtrate was concentrated *in vacuo* to afford 0.039 g of a mixture of **28d** and **29d** (34:66). The resulting solid was dissolved in 1.5 mL of  $\text{CDCl}_3$ . The areas of the C–H peak on the aromatic region were compared to derive a ratio (34:66). The products were identified by comparison with  $^1\text{H}$  NMR spectra of **28d**.

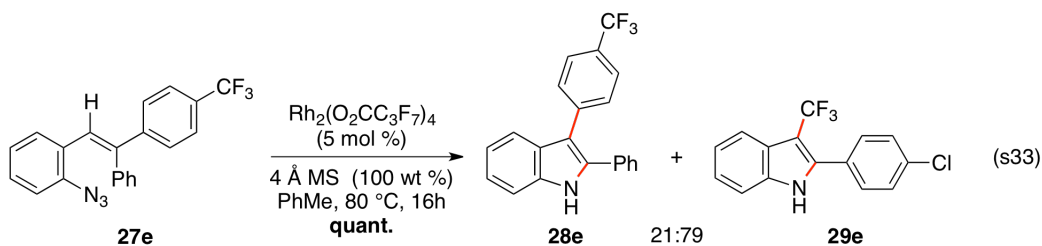

To a mixture of 0.040 g of aryl azide **27e** (0.11 mmol), 0.040 g of crushed 4 Å mol sieves, and 0.006 g of  $\text{Rh}_2(\text{O}_2\text{CC}_3\text{F}_7)_4$  (0.005 mol) in Schlenk tube was added 0.50 mL of PhMe. The resulting mixture was heated at 80 °C, after 16 h, the heterogenous mixture was filtered through a short pad of  $\text{Al}_2\text{O}_3$ . The filtrate was concentrated *in vacuo* to afford 0.032 g of a mixture of **28e** and **29e** (21:79). The resulting solid was dissolved in 1.5 mL of  $\text{CDCl}_3$ . The areas of the C–H peak on the aromatic region were compared to derive a ratio (21:79). The products were identified by comparison with  $^1\text{H}$  NMR spectra of **28e**.

#### D. Correlation of Product Ratio with Hammett Plot.

The log of the product ratios were correlated with Hammett  $\sigma$ -values to ascertain the existence of any linear free energy relationships.

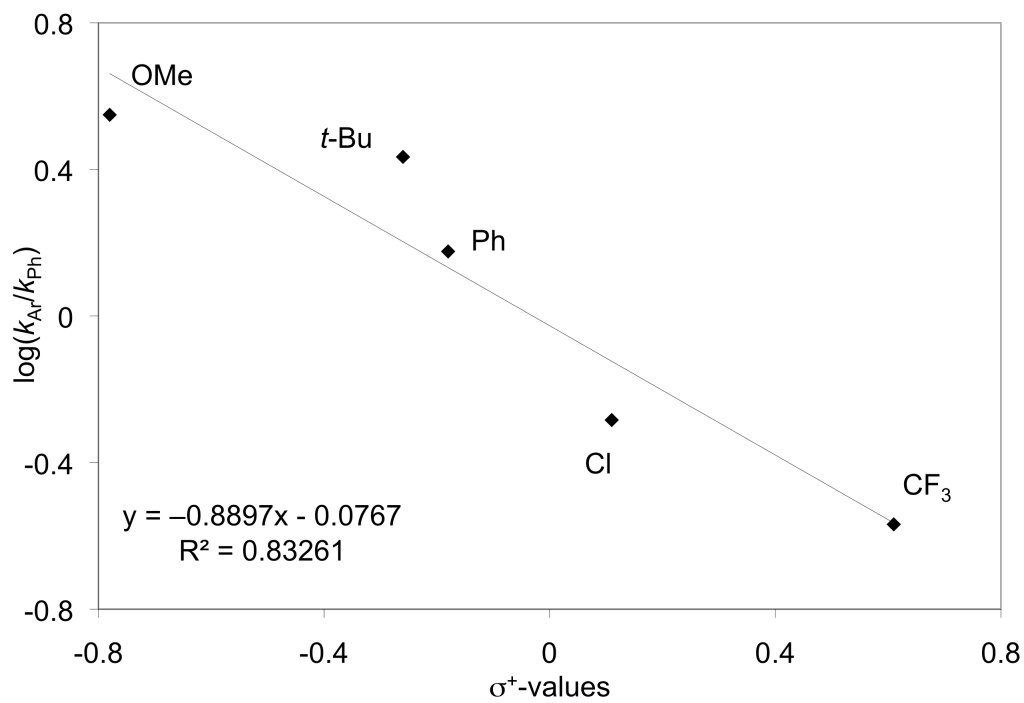

**Figure s1.** Correlation of Product Ratios with Hammett  $\sigma^+$ -Values.

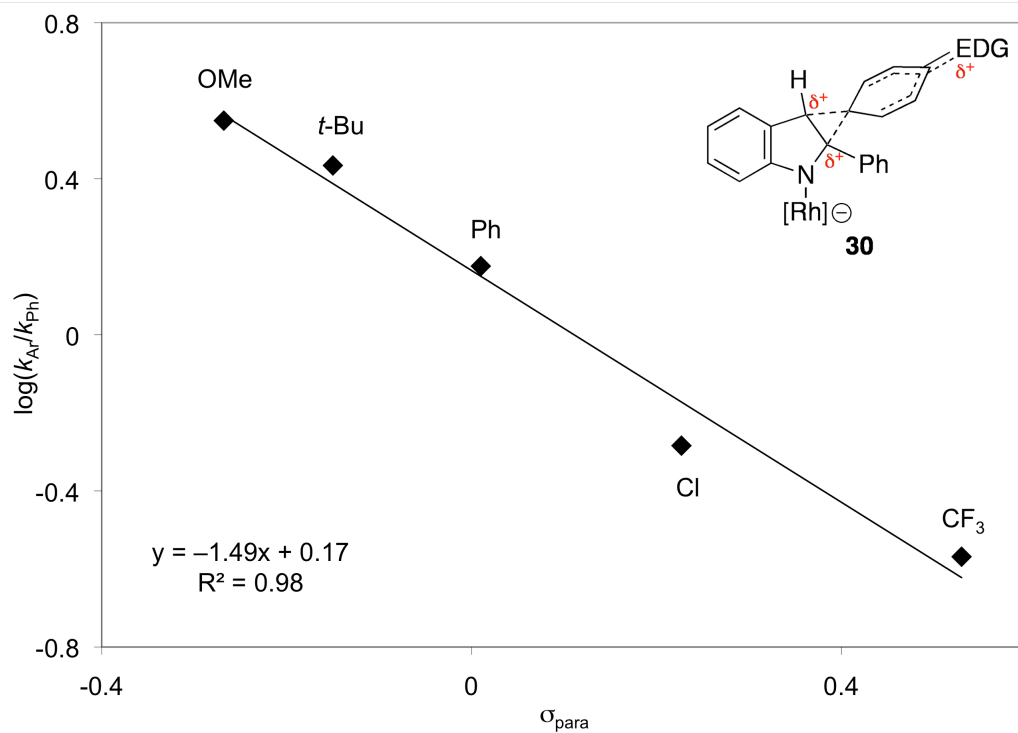

**Figure s2.** Correlation of Product Ratios with Hammett  $\sigma_{para}$ -Values.

#### D. Intermolecular Competition Experiment.

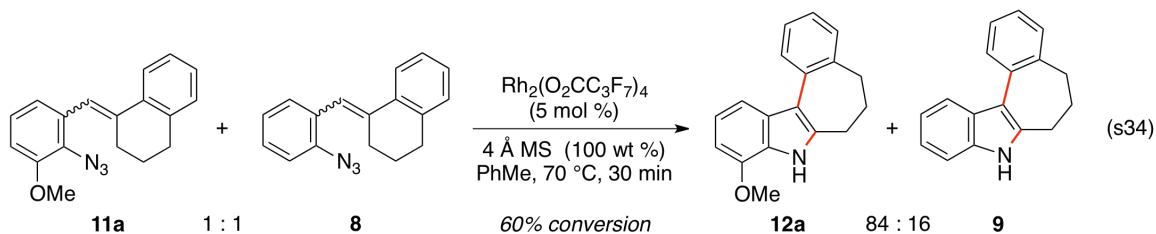

To a mixture of 0.013 g of styryl azide **11a** (0.05 mmol) and 0.0145 g of styryl azide **8** (0.05 mmol), 100 % w/w of crushed 4 Å mol sieves, and  $\text{Rh}_2(\text{hpfb})_4$  (5 mol %) in Schlenk tube was added 0.50 mL of PhMe. The resulting mixture was heated at 70 °C. After 30 min, the heterogenous mixture was filtered through a short pad of  $\text{Al}_2\text{O}_3$ . The filtrate was concentrated *in vacuo* to afford analytically pure indoles. Analysis of the  $^1\text{H}$  NMR spectrum showed 98% conversion of the styryl azide **11a** into **12a** and 23% conversion of the styryl azide **8** into indole **9**.  $^1\text{H}$  NMR (500 MHz,  $\text{CDCl}_3$ )  $\delta$  4.02 (s, 3 H) vs 3.94 (s, 0.0734 H) vs 7.07 – 7.08 (m, 0.774 H) = **12a** vs **11a** vs **9**.

#### D. Examination of Rates of Reaction of *E*- and *Z*-Isomers.

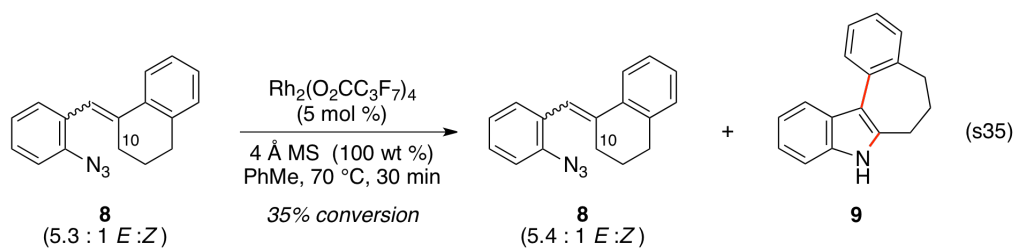

To a mixture of 0.043 g of aryl azide **8** (0.16 mmol), 0.043 g of crushed 4 Å mol sieves, and 0.009 g of  $\text{Rh}_2(\text{O}_2\text{CC}_3\text{F}_7)_4$  (0.008 mol) in Schlenk tube was added 0.60 mL of PhMe. The resulting mixture was heated at 70 °C, after 30 min, the heterogenous mixture was filtered through a short pad of  $\text{Al}_2\text{O}_3$ . The filtrate was concentrated *in vacuo*. The resulting solid (oil) was dissolved in 1.5 mL of  $\text{CDCl}_3$ . The areas of the C–H peak on the carbon **9** in starting material aryl azide **8** was compared to derive a *E*:*Z* ratio.

## VI. References.

- (1) Pangborn, A. B.; Giardello, M. A.; Grubbs, R. H.; Rosen, R. K.; Timmers, F. J. *Organometallics* **1996**, *15*, 1518-1520.
- (2) Stokes, B. J.; Vogel, C. V.; Urnezis, L. K.; Pan, M.; Driver, T. G. *Org. Lett.* **2010**, *12*, 2884-2887.
- (3) Brawn, R. A.; Welzel, M.; Lowe, J. T.; Panek, J. S. *Org. Lett.*, *12*, 336-339.
- (4) Main, C. A.; Petersson, H. M.; Rahman, S. S.; Hartley, R. C. *Tetrahedron* **2007**, *64*, 901-914.
- (5) Hill, T. J.; Hughes, R. K.; Scott, L. T. *Tetrahedron* **2008**, *64*, 11360-11369.
- (6) Chong, P. Y.; Janicki, S. Z.; Petillo, P. A. *J. Org. Chem.* **1998**, *63*, 8515-8521.
- (7) Liu, Q.; Tor, Y. *Org. Lett.* **2003**, *5*, 2571-2572.
- (8) Sun, K.; Sachwani, R.; Richert, K. J.; Driver, T. G. *Org. Lett.* **2009**, *11*, 3598-3601.
- (9) Smith, P. A. S.; Rowe, C. D.; Hansen, D. W. *Tetrahedron Lett.* **1983**, *24*, 5169-5172.
- (10) Katritzky, A. R.; Wang, Z. *J. Heterocycl. Chem.* **1988**, *25*, 671-675.
- (11) Tan, Y.; Hartwig, J. F. *J. Am. Chem. Soc.* **2010**, *132*, 3676-3677.
- (12) Chiba, S.; Hattori, G.; Narasaka, K. *Chem. Lett.* **2007**, *36*, 52-53.
- (13) Leogane, O.; Lebel, H. *Angew. Chem., Int. Ed.* **2008**, *47*, 350-352.
- (14) Banwell, M. G.; Kelly, B. D.; Kokas, O. J.; Lupton, D. W. *Org. Lett.* **2003**, *5*, 2497-2500.
- (15) Cacchi, S.; Fabrizi, G.; Lamba, D.; Marinelli, F.; Parisi, L. M. *Synthesis* **2003**, 728-734.
- (16) Wang, X.; Gribkov, D. V.; Sames, D. *J. Org. Chem.* **2007**, *72*, 1476-1479.
- (17) Cacchi, S.; Fabrizi, G.; Goggiamani, A.; Perboni, A.; Sferrazza, A.; Stabile, P. *Org. Lett.* **2010**, *12*, 3279-3281.



## Contents

|       |                                                                                |       |
|-------|--------------------------------------------------------------------------------|-------|
| VII.  | Spectral Data for Substrate Preparation via Wittig Route .....                 | s-46  |
| VIII. | Spectral Data for Substrate Preparation via Horner–Wadsworth–Emmons Route..... | s-88  |
| IX.   | Spectral Data for Substrate Preparation via Suzuki Route.....                  | s-100 |
| X.    | Spectral Data for 2,3-Disubstituted Indoles.....                               | s-134 |
| XI.   | Spectral Data for Mechanistic Experiments.....                                 | s-178 |

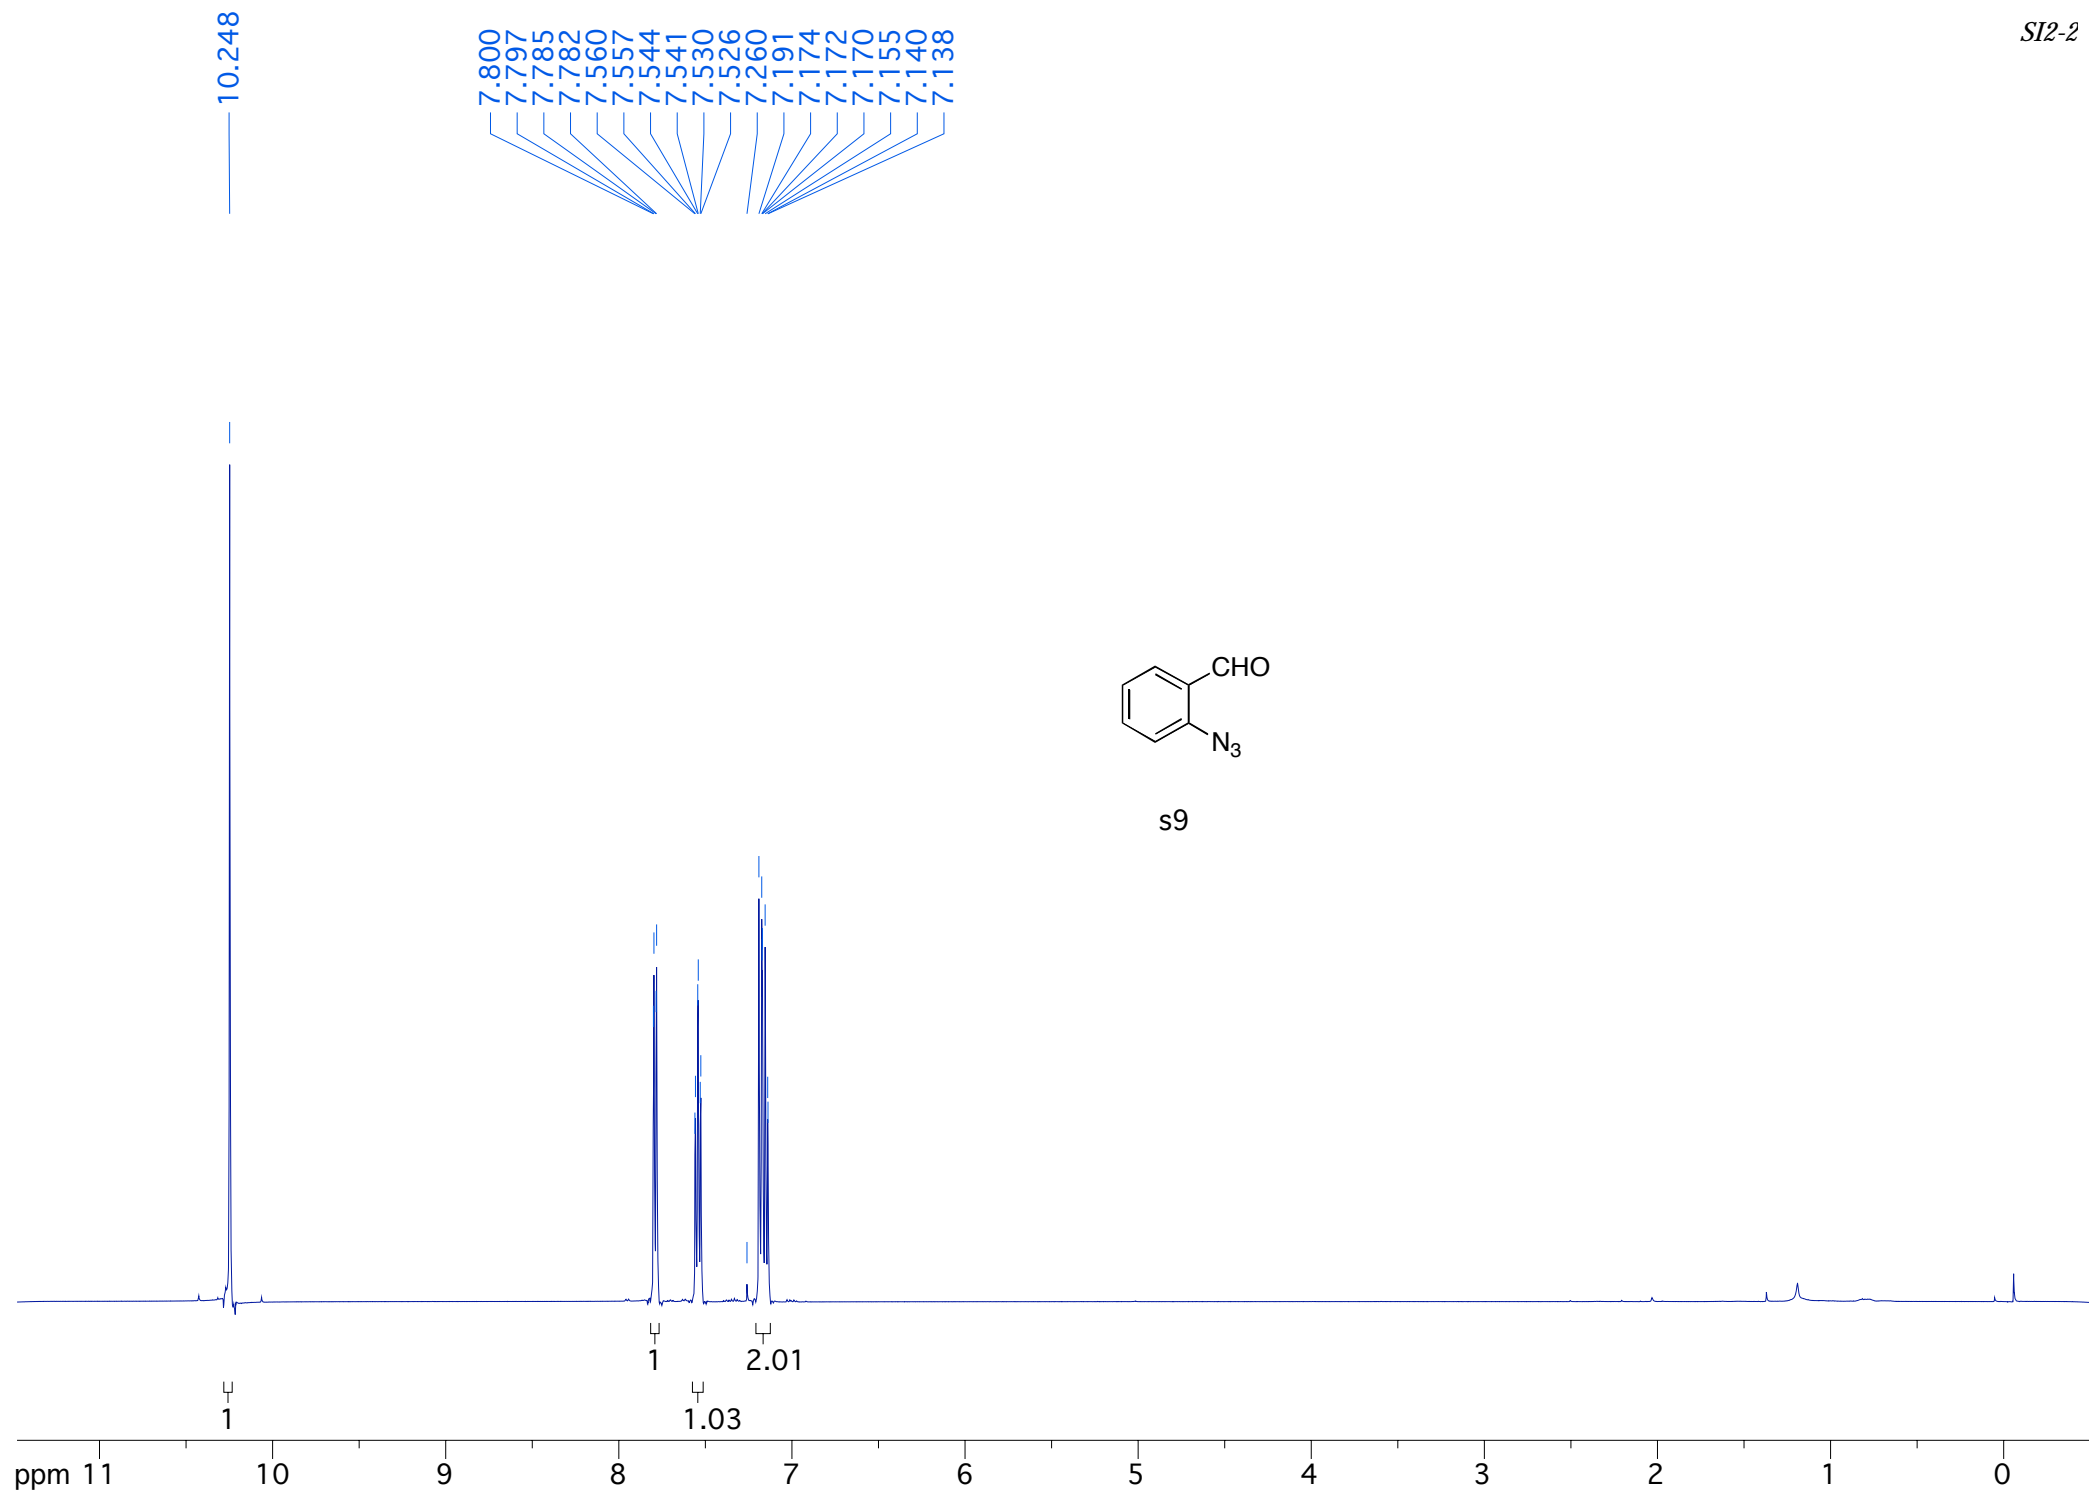

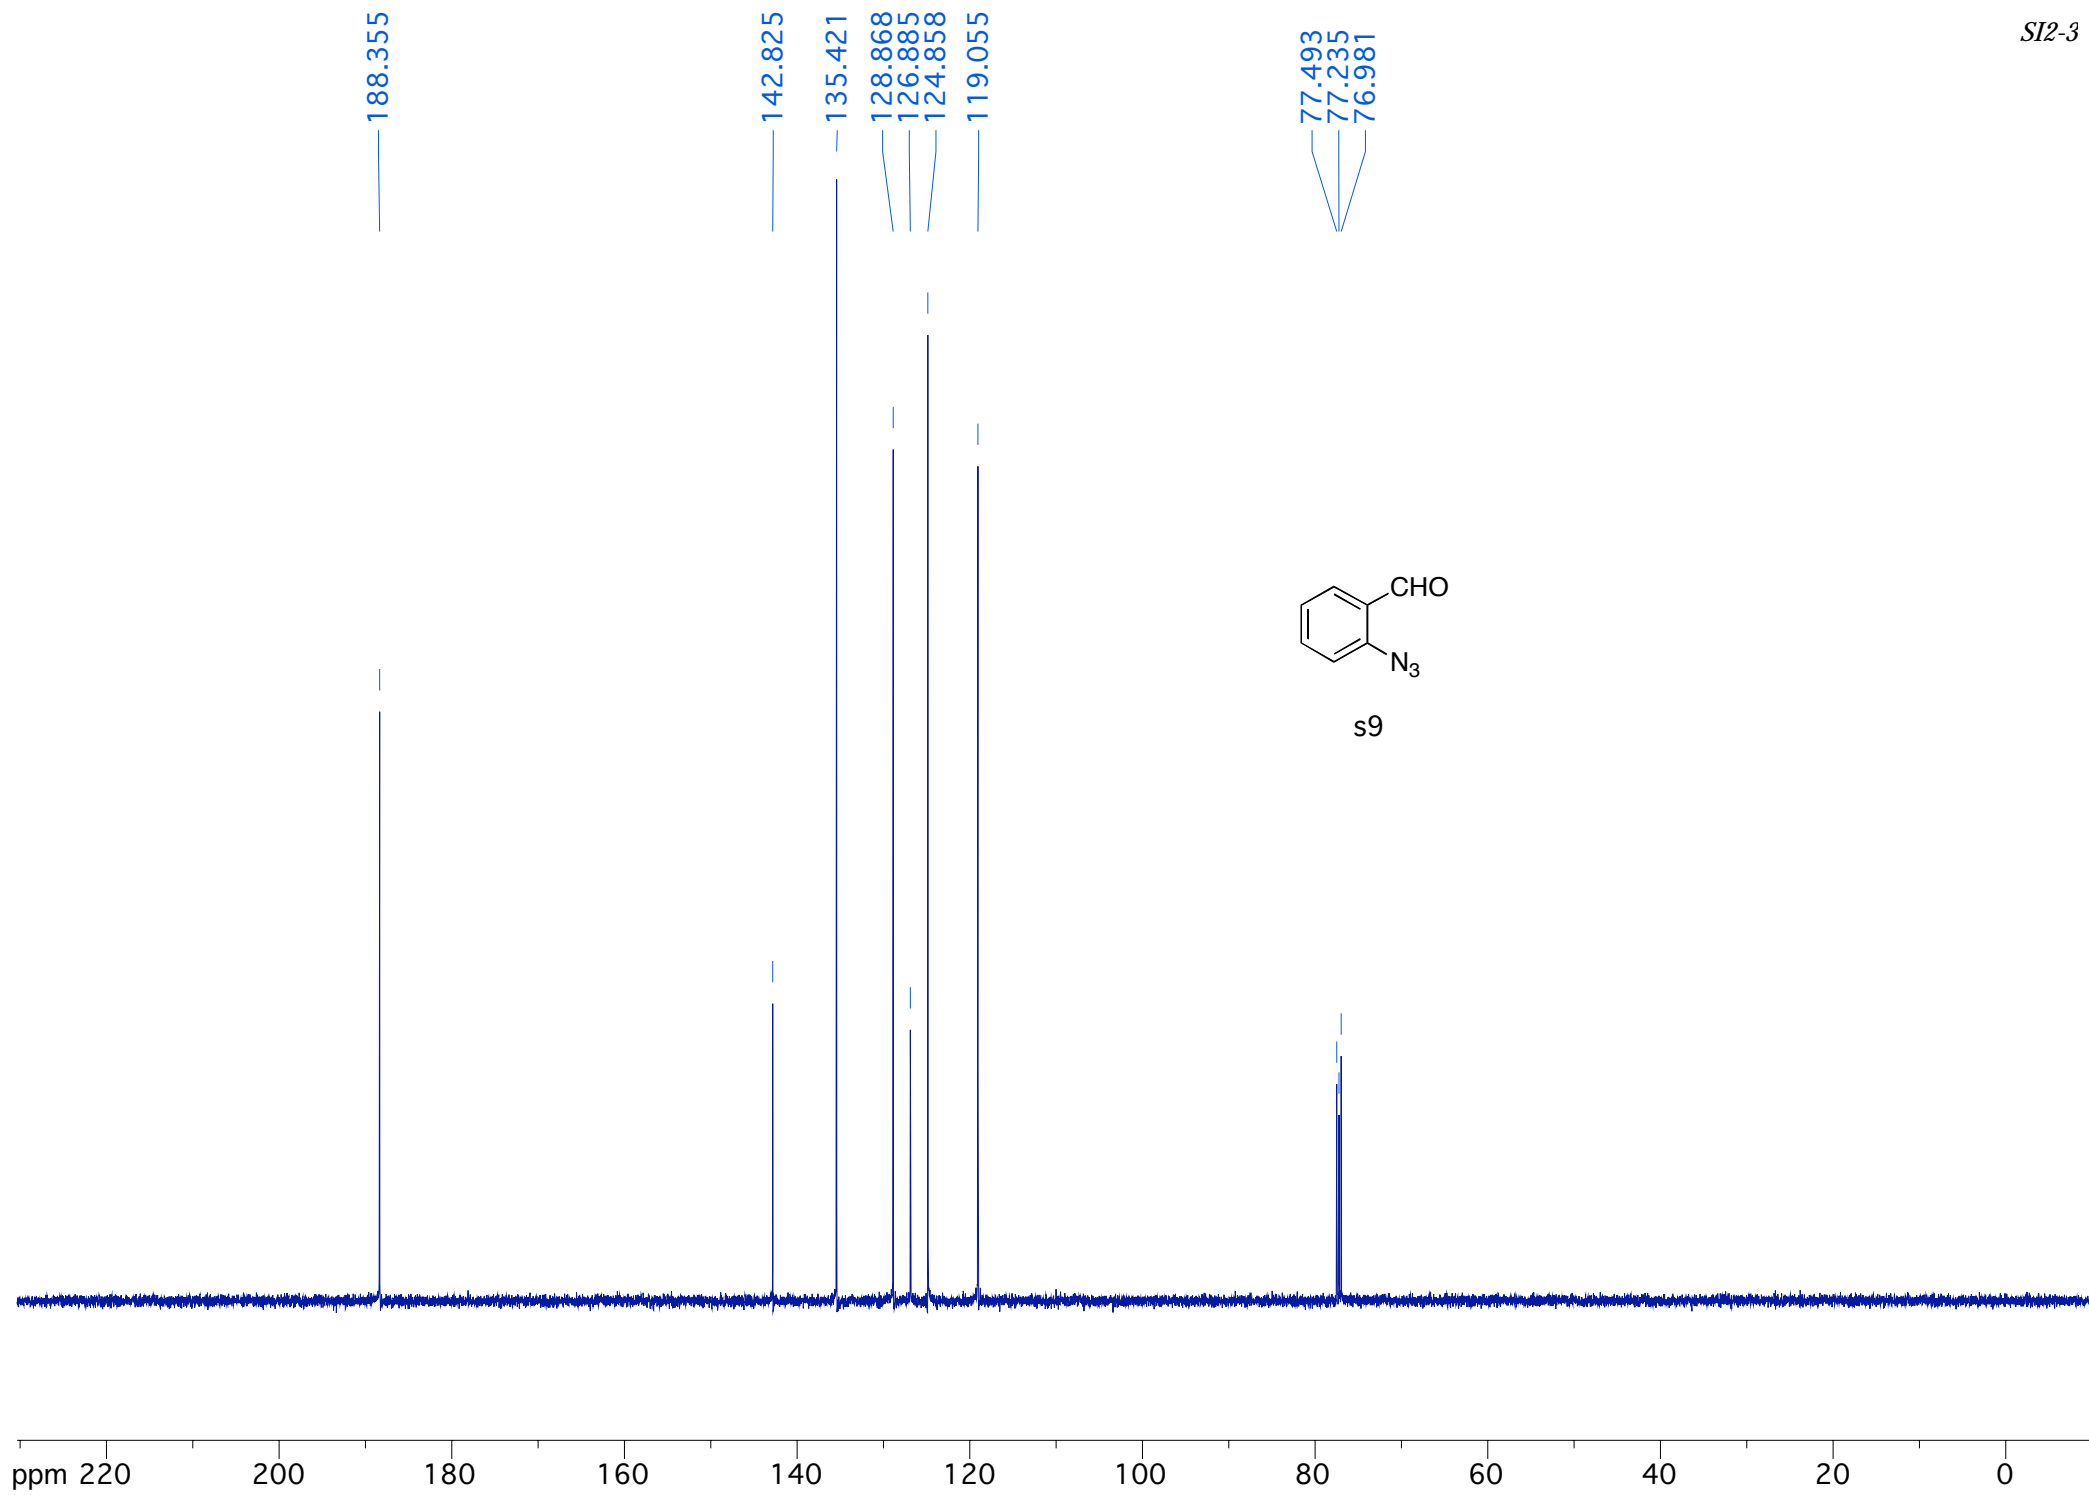

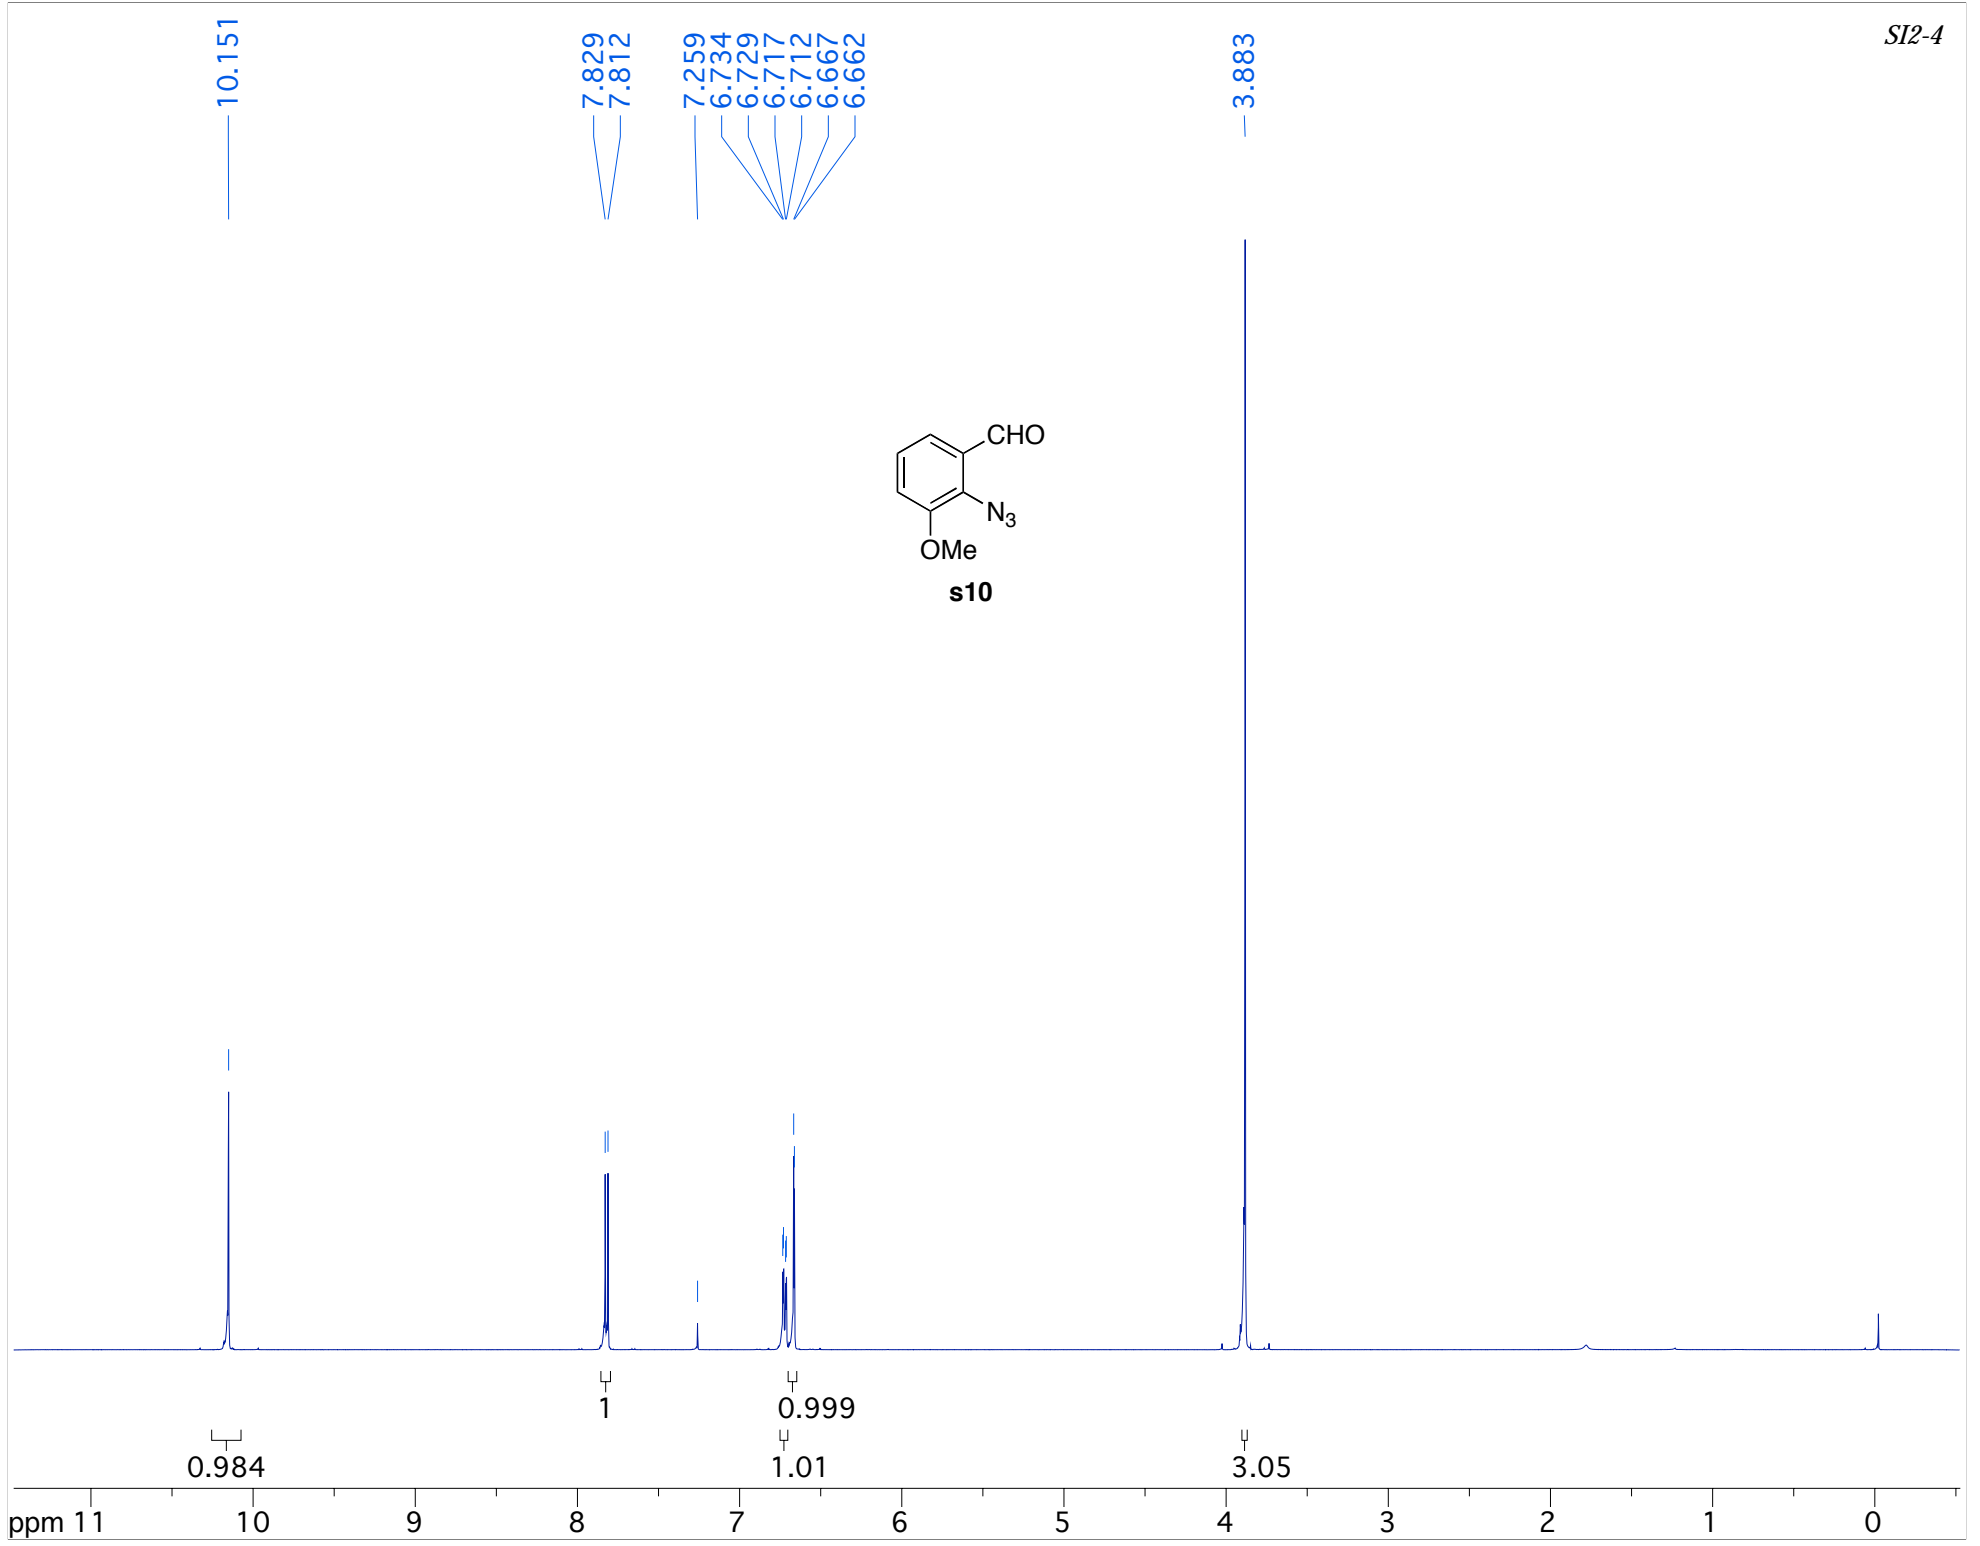

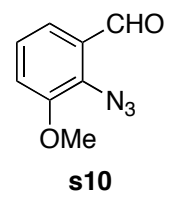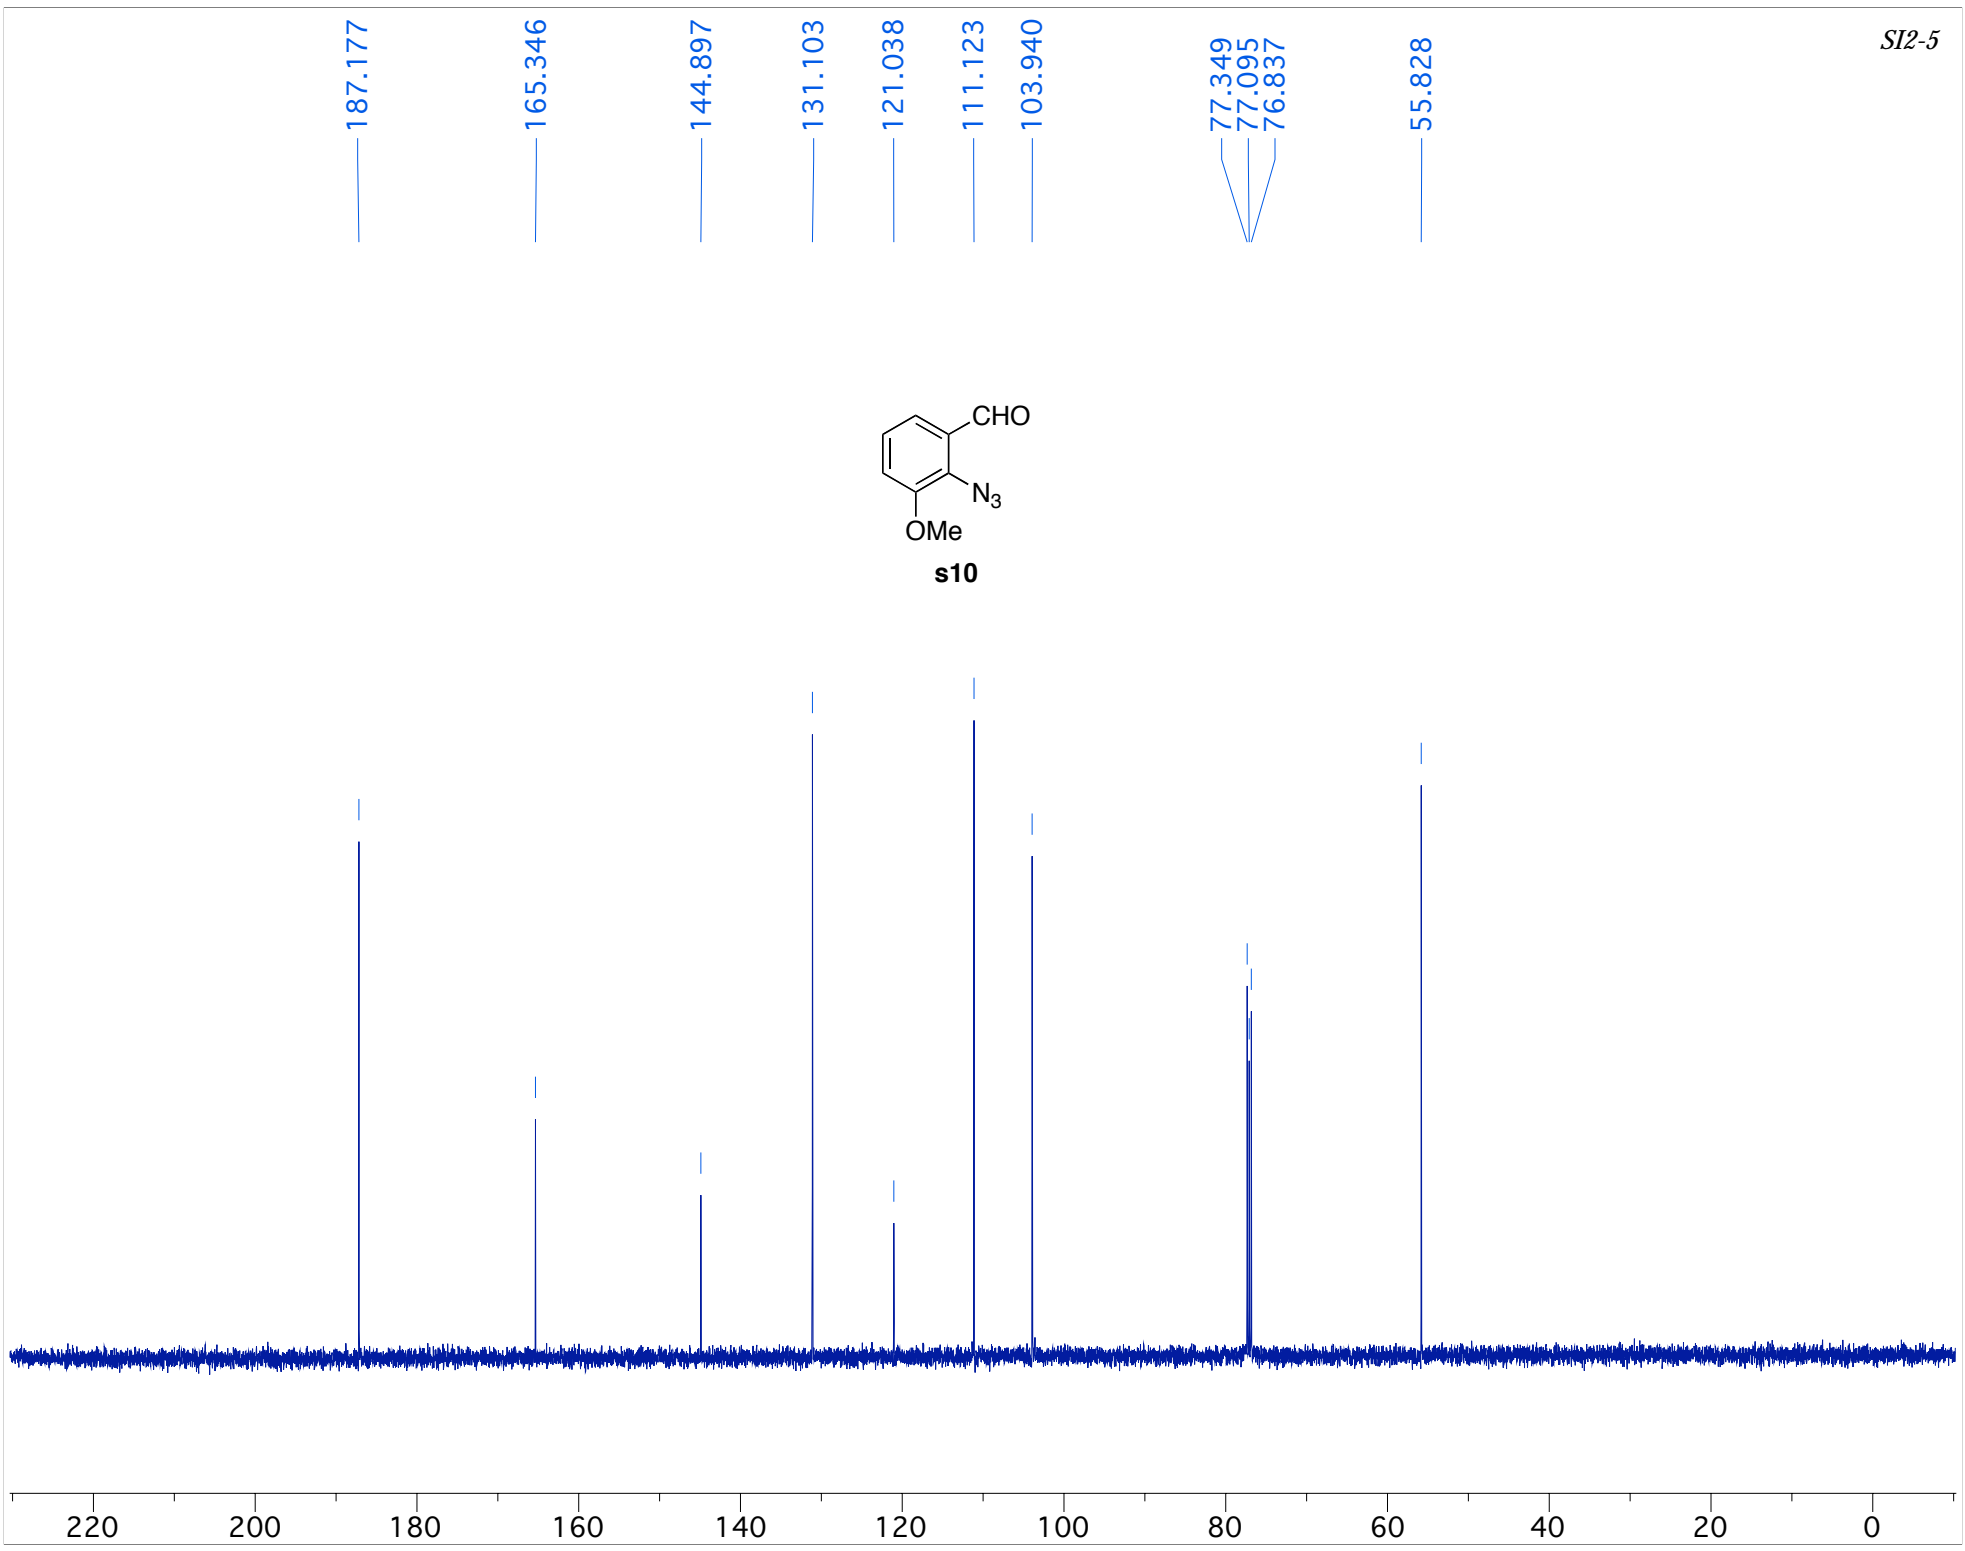

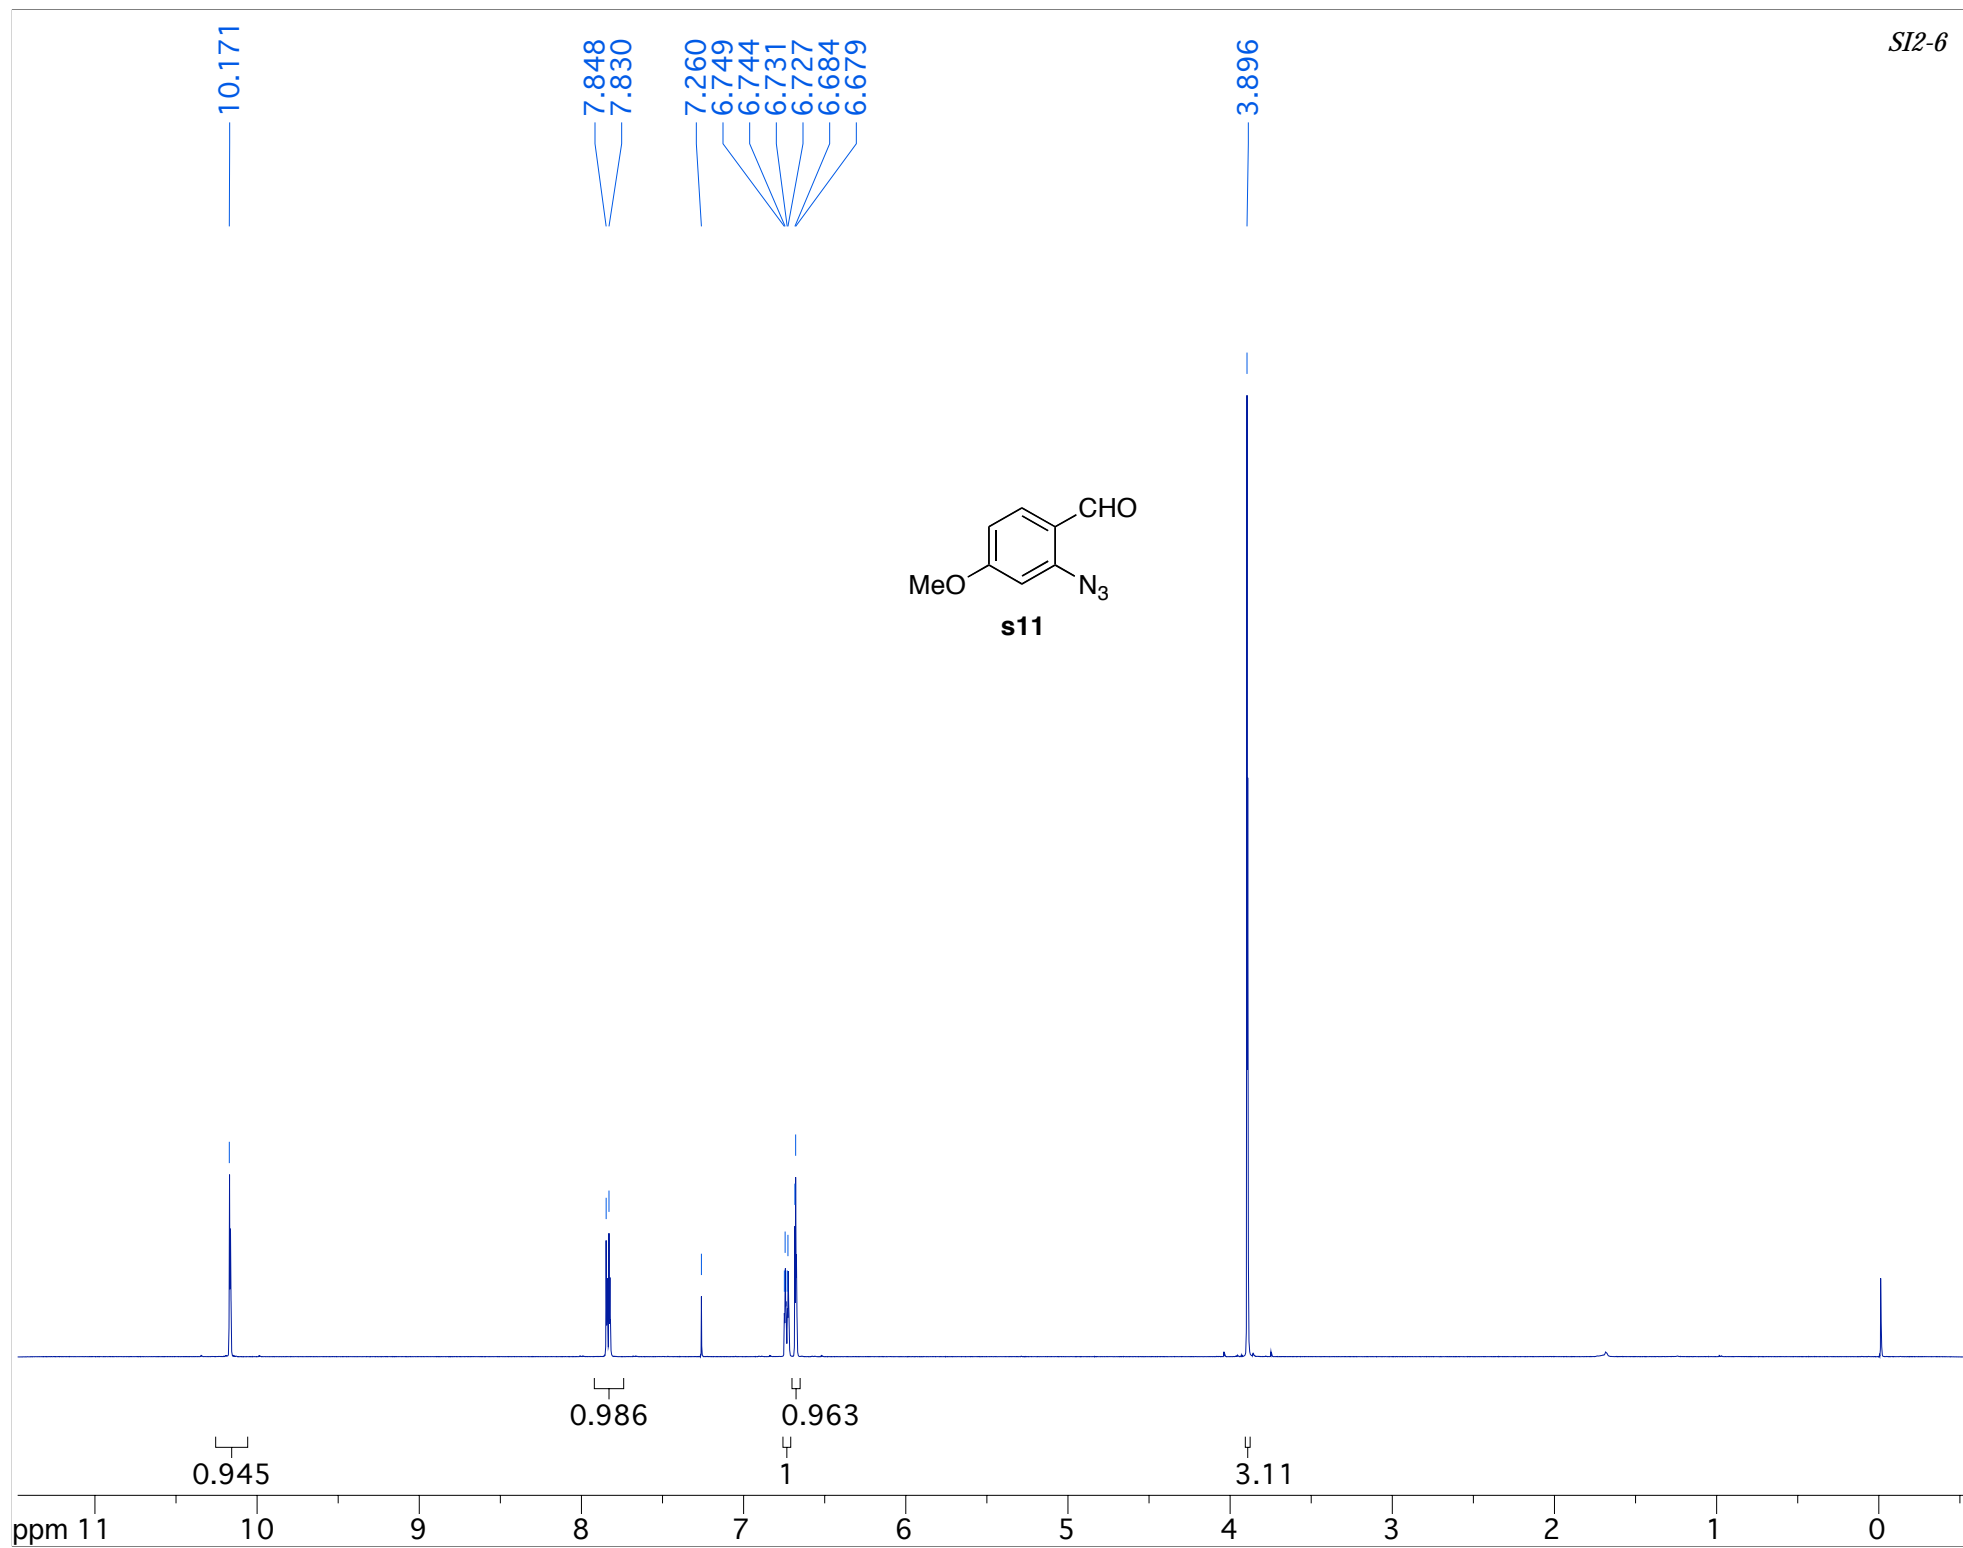

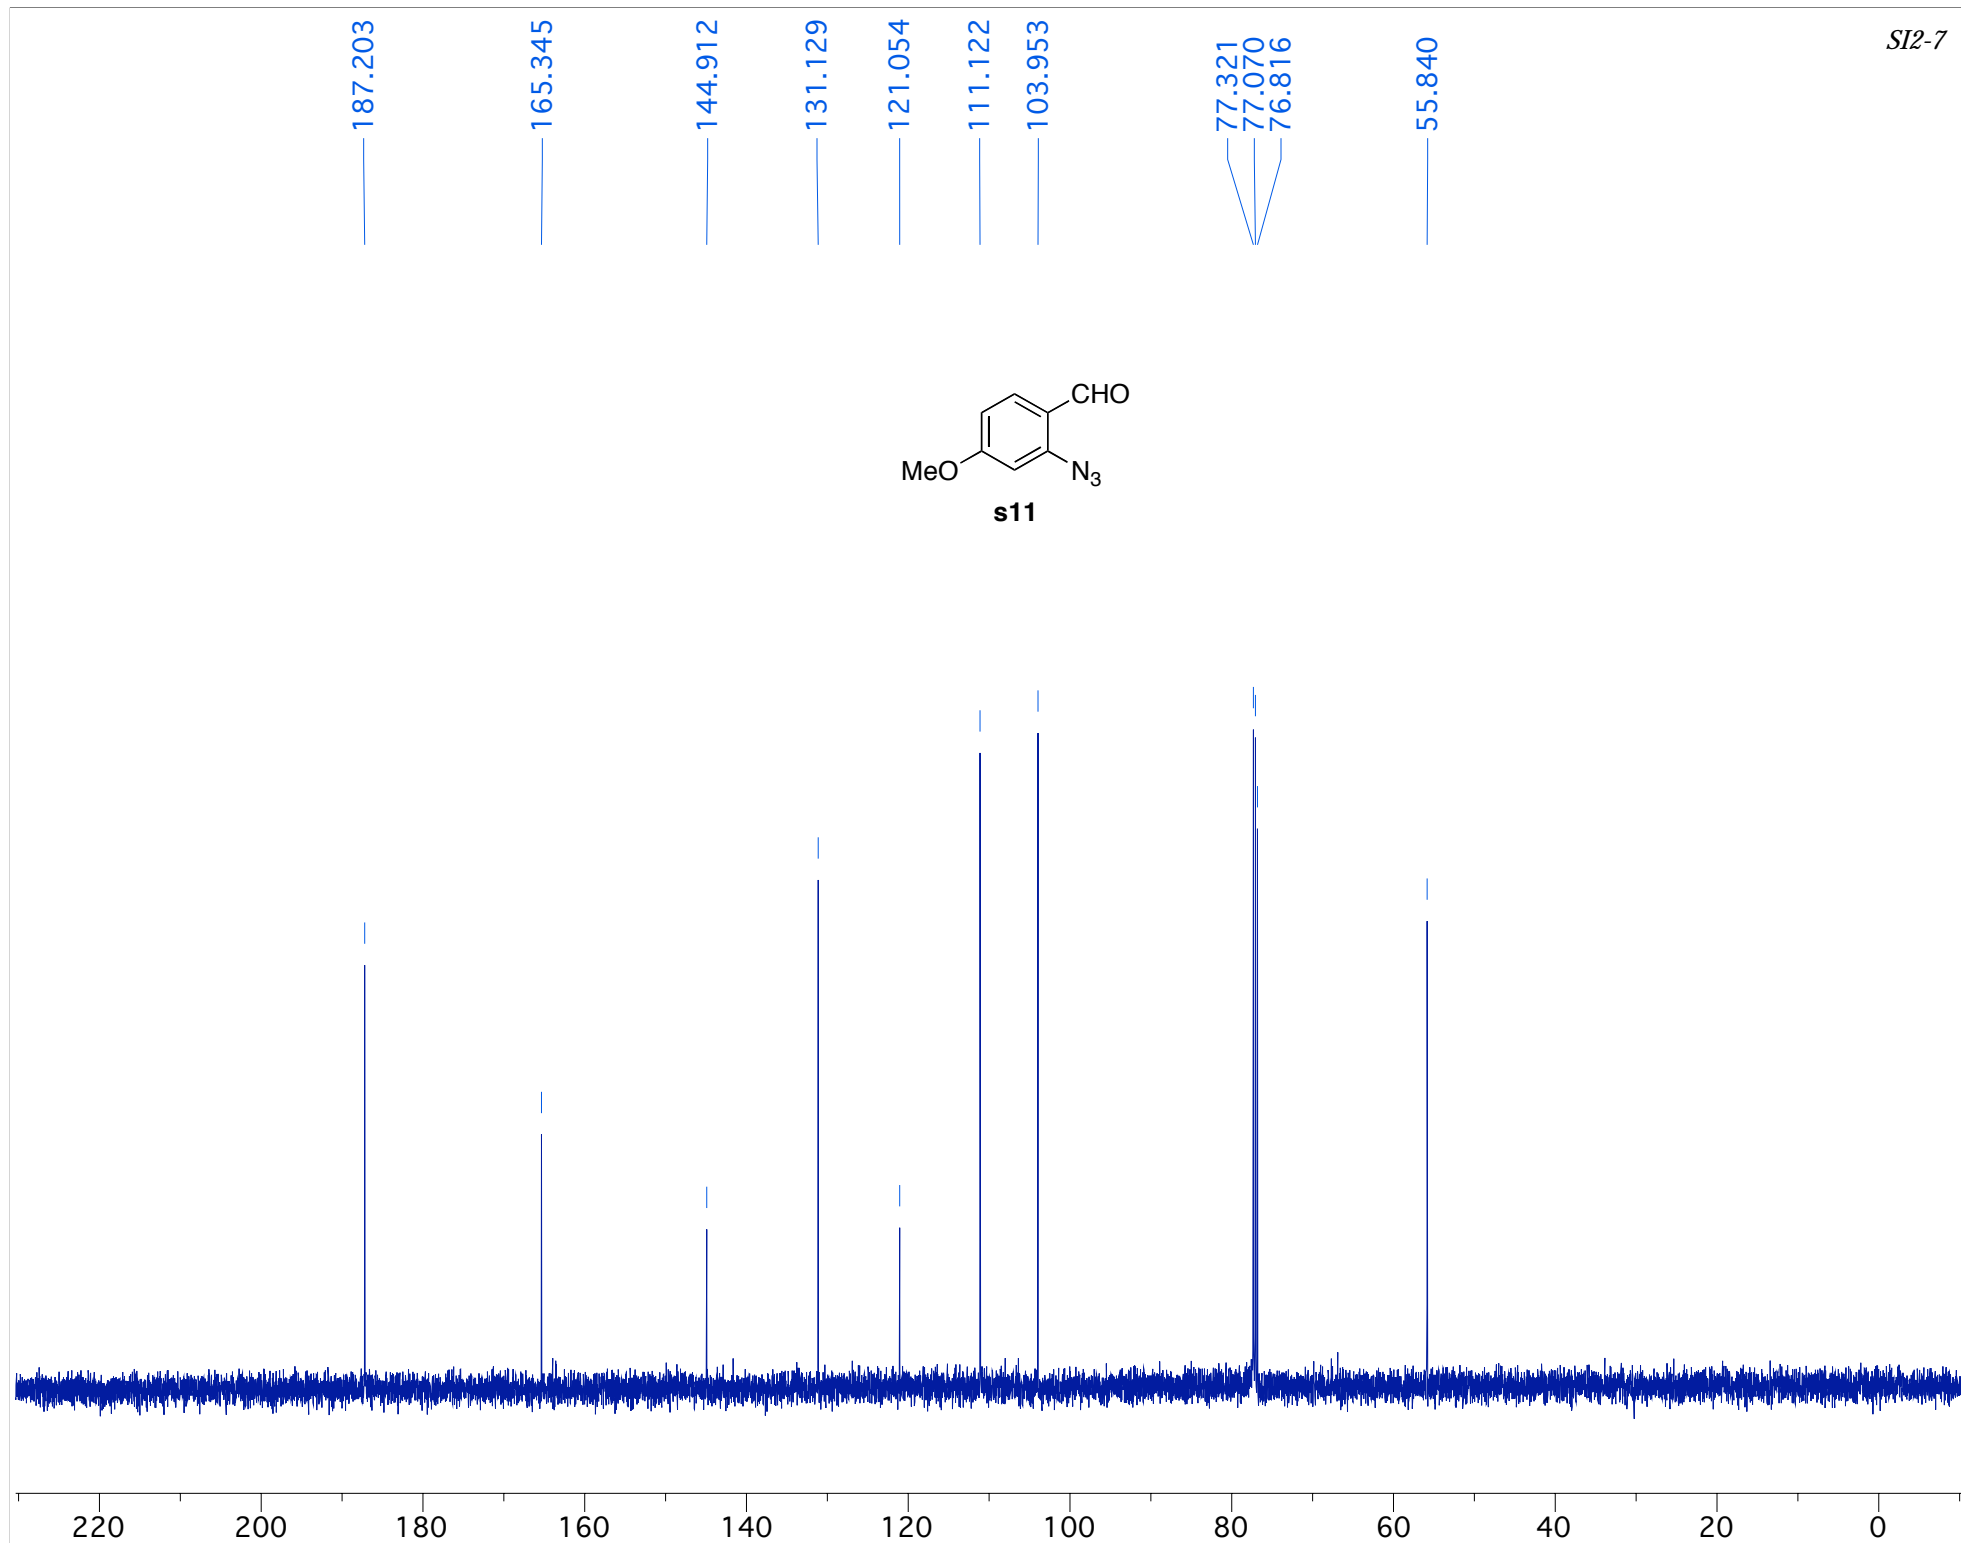

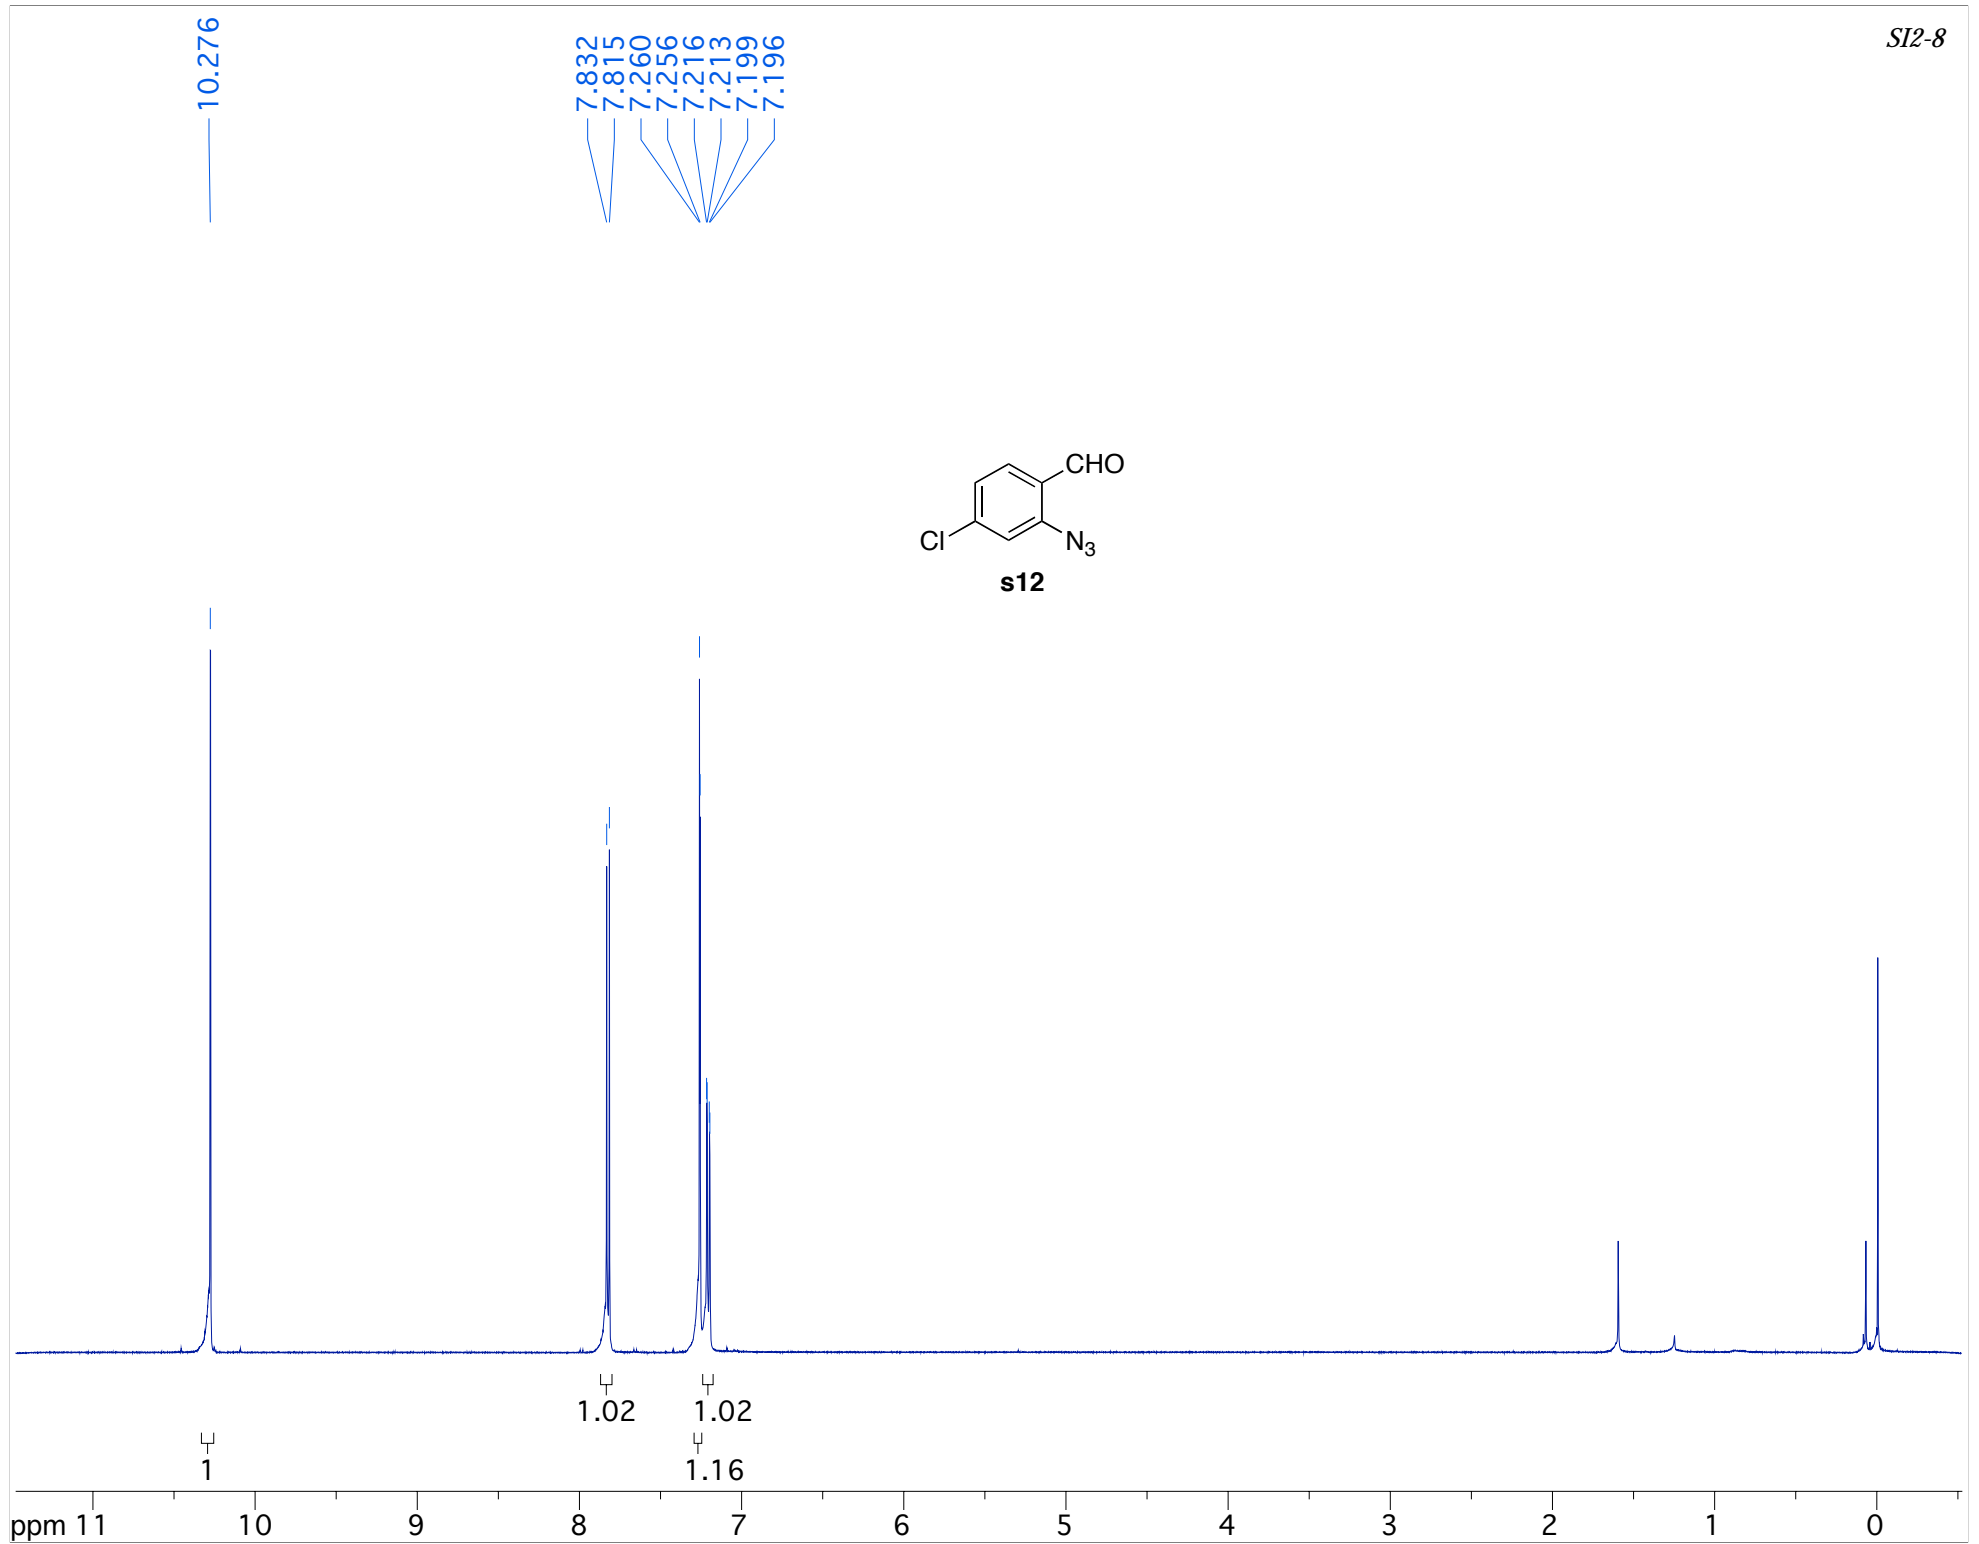



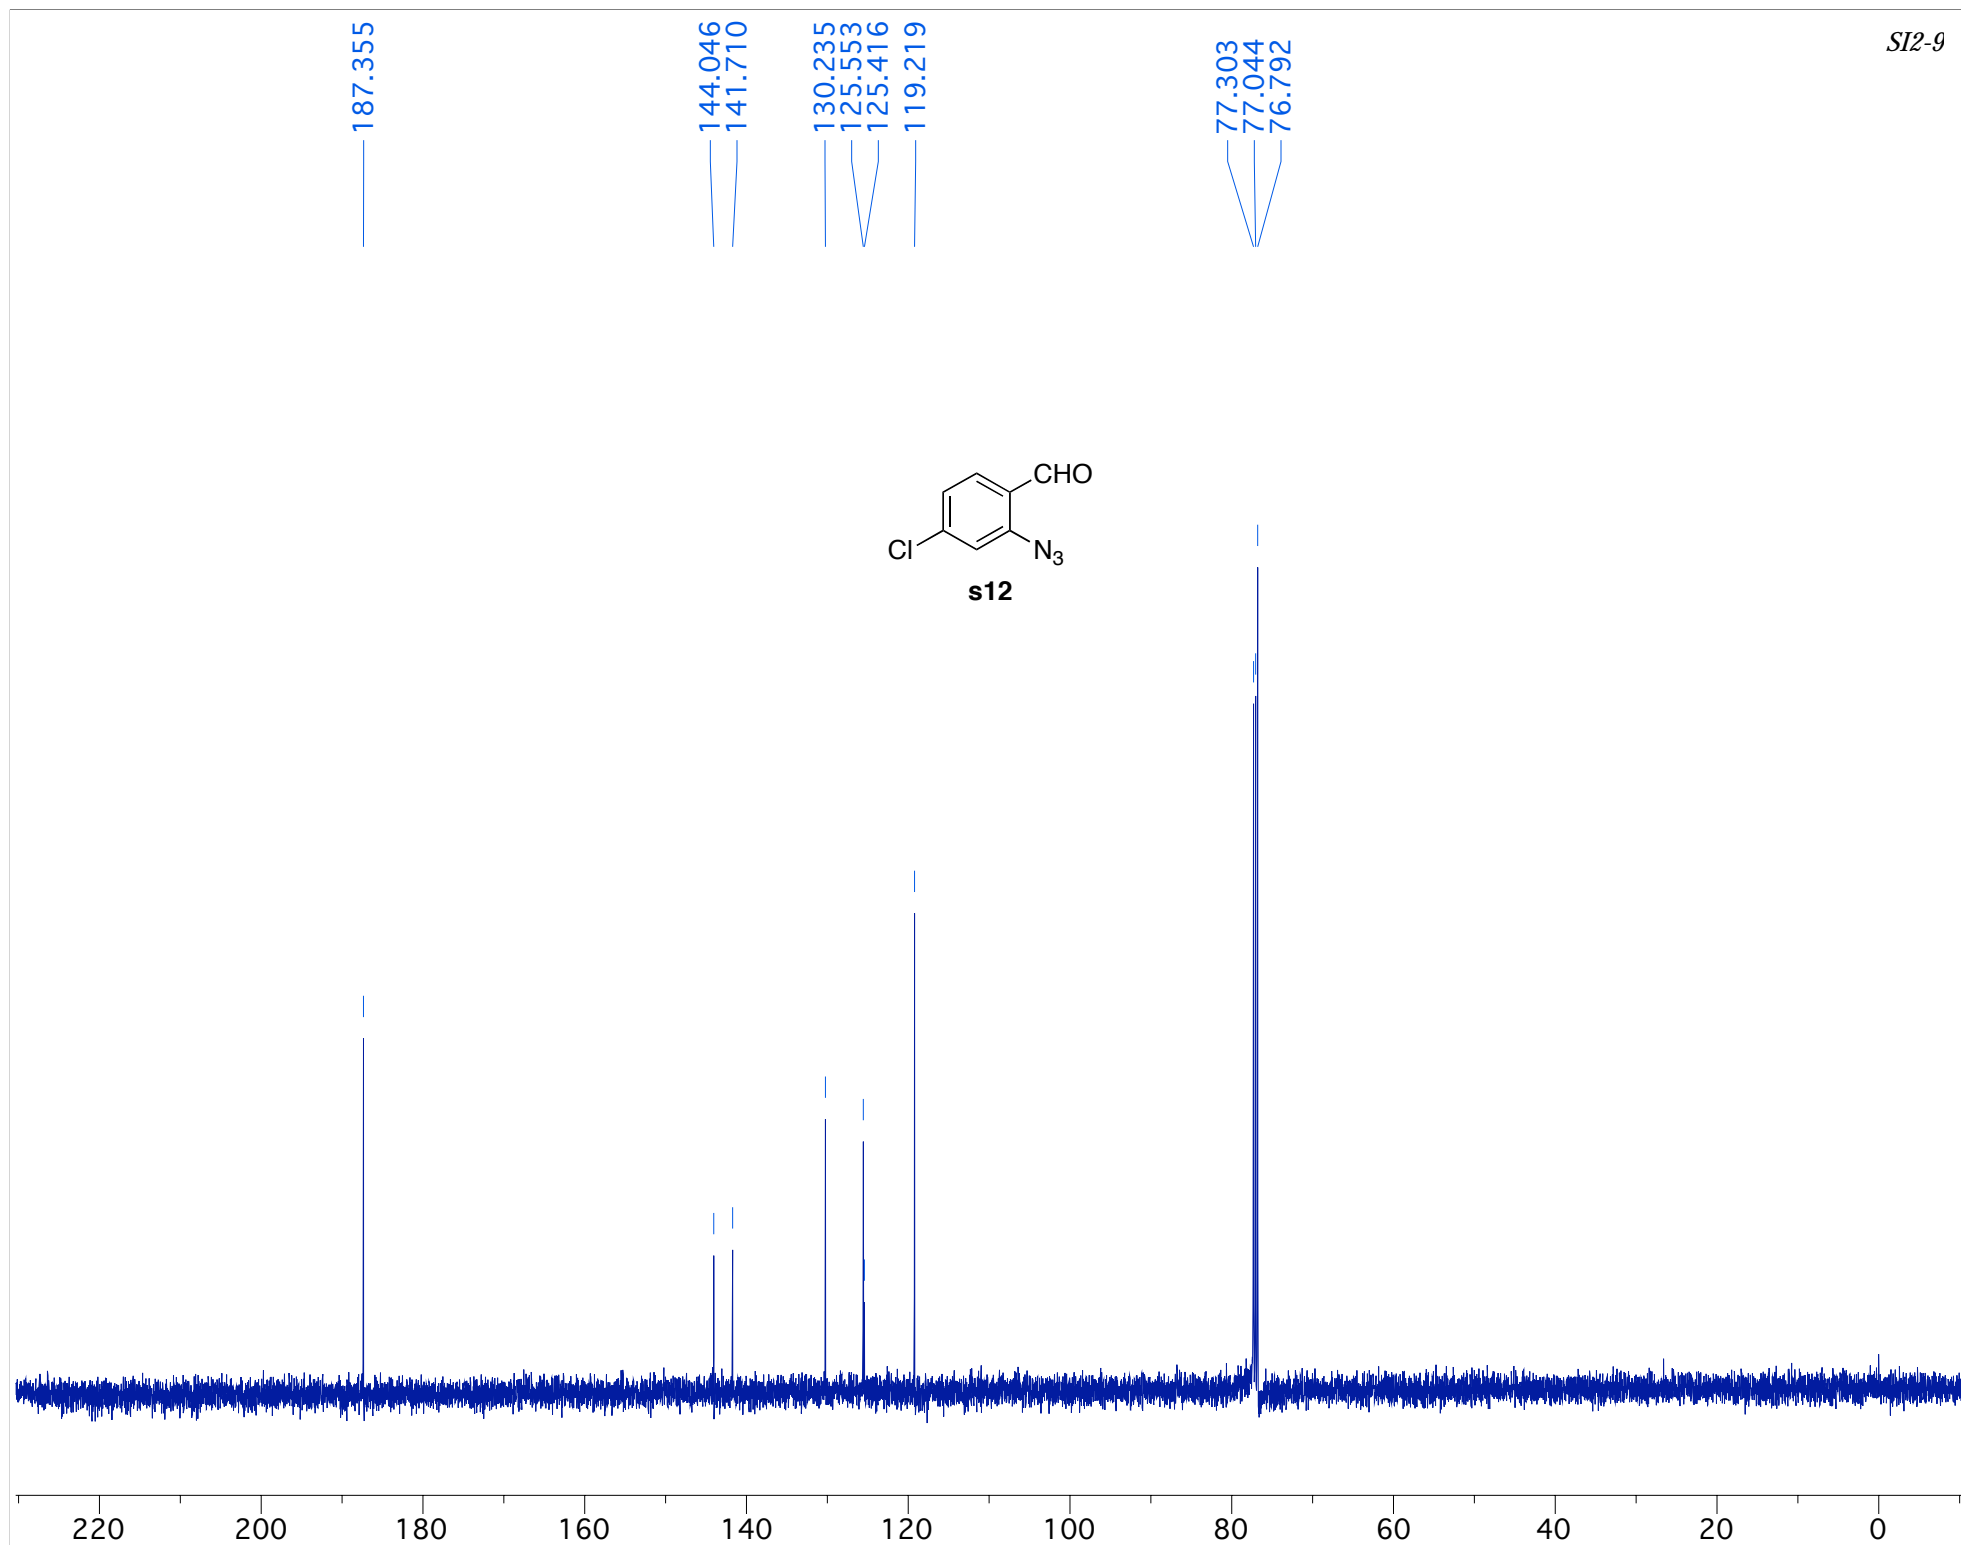

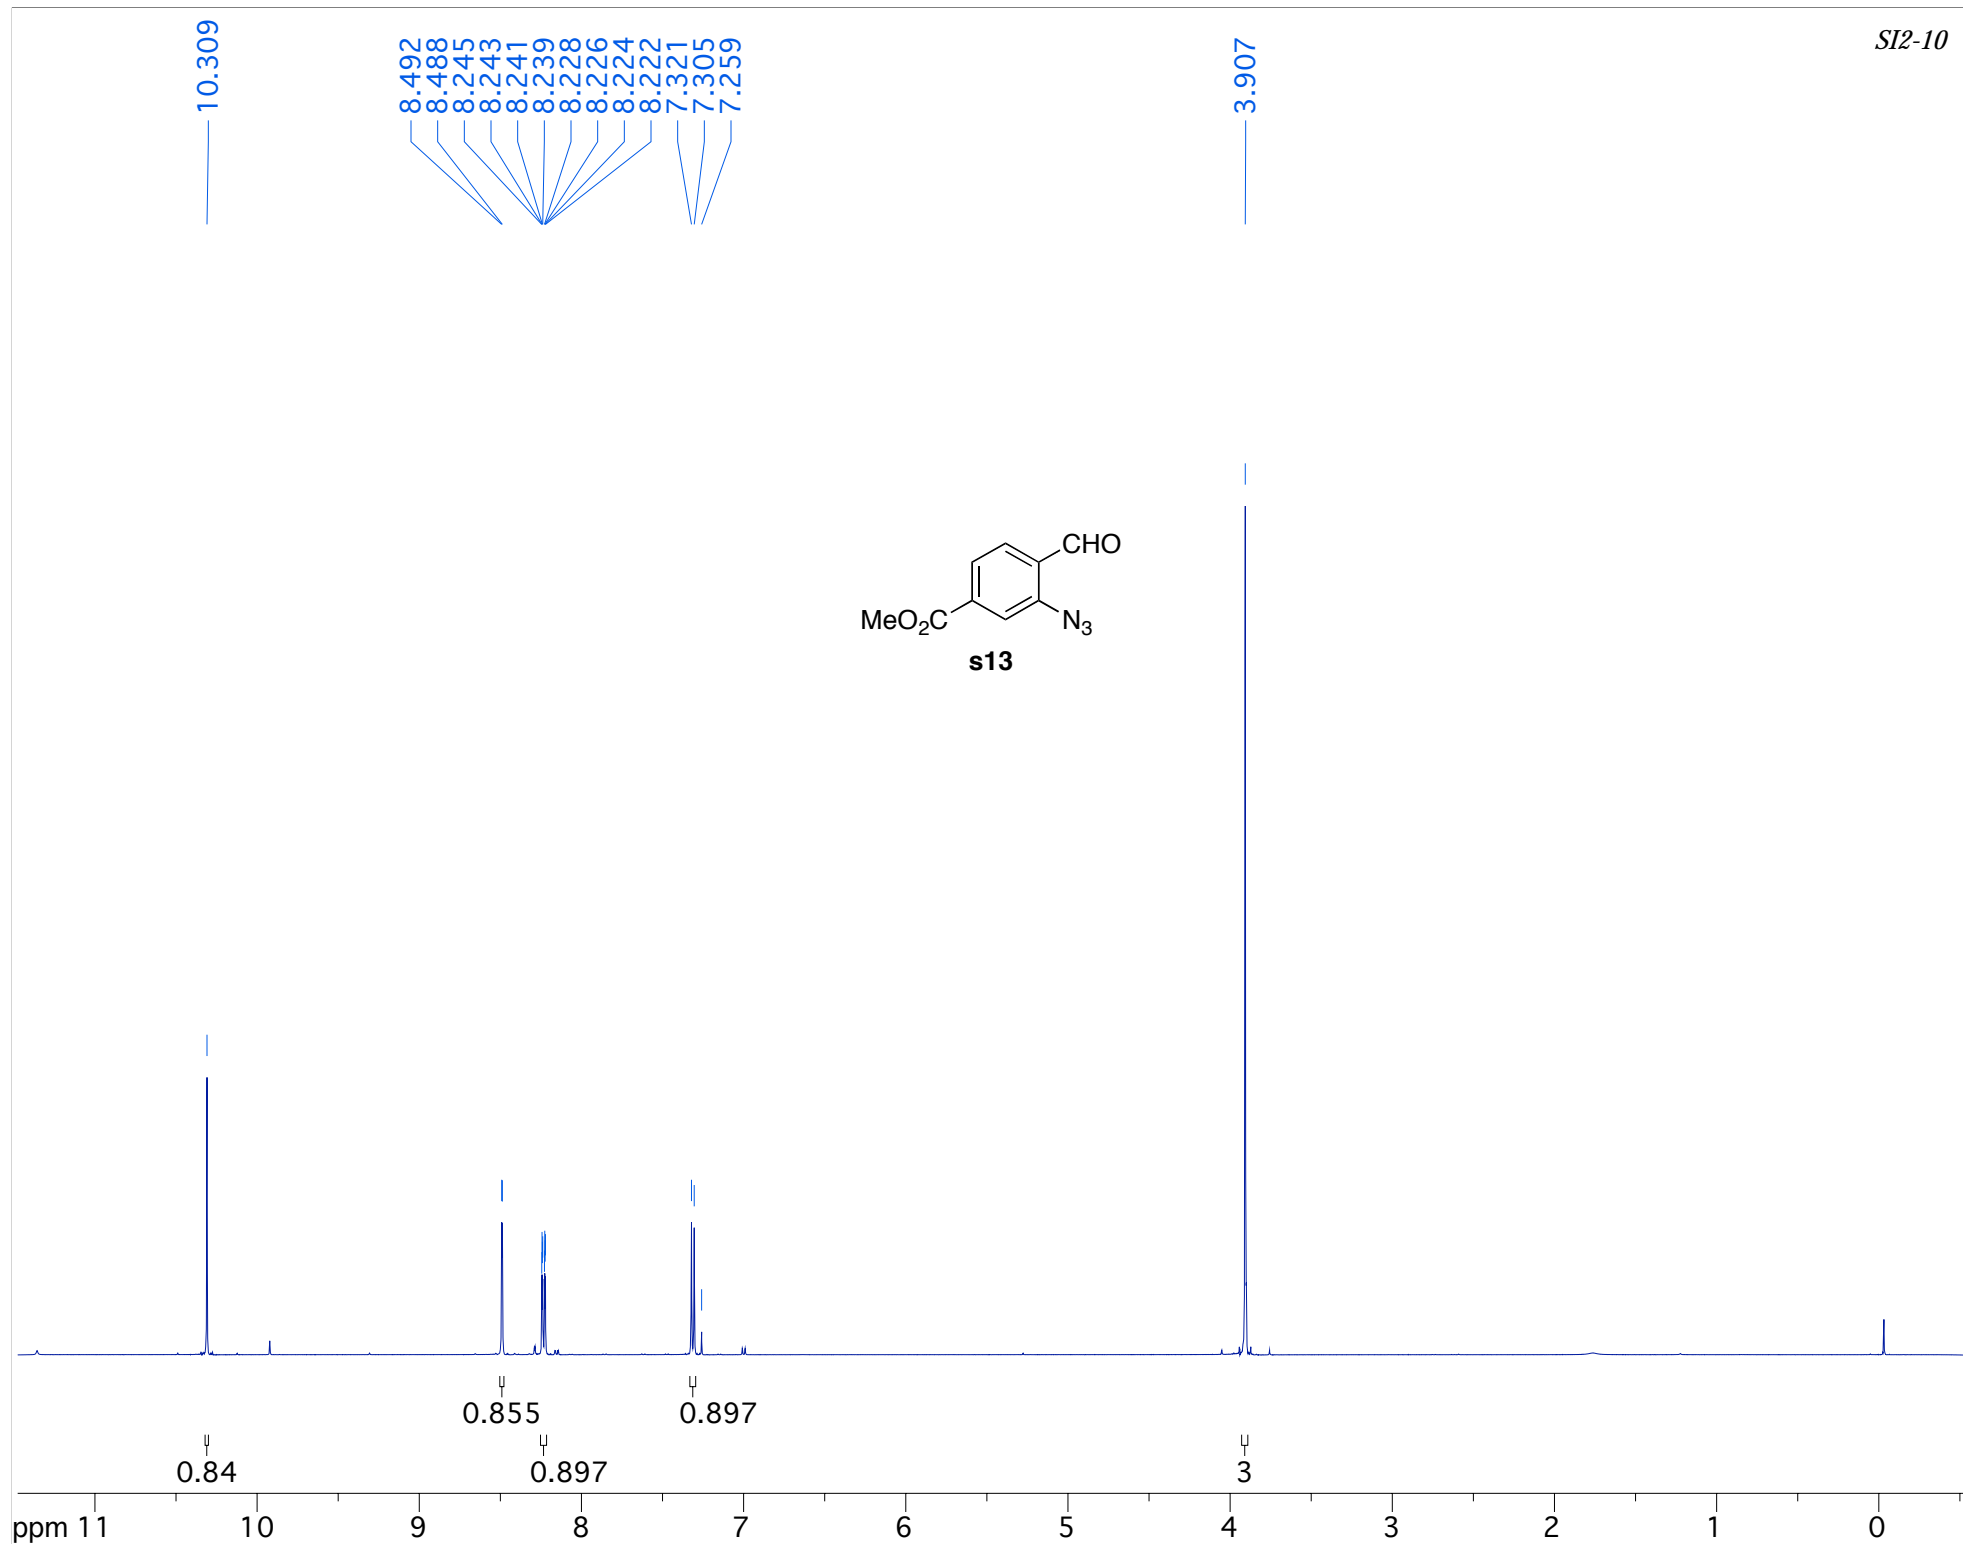

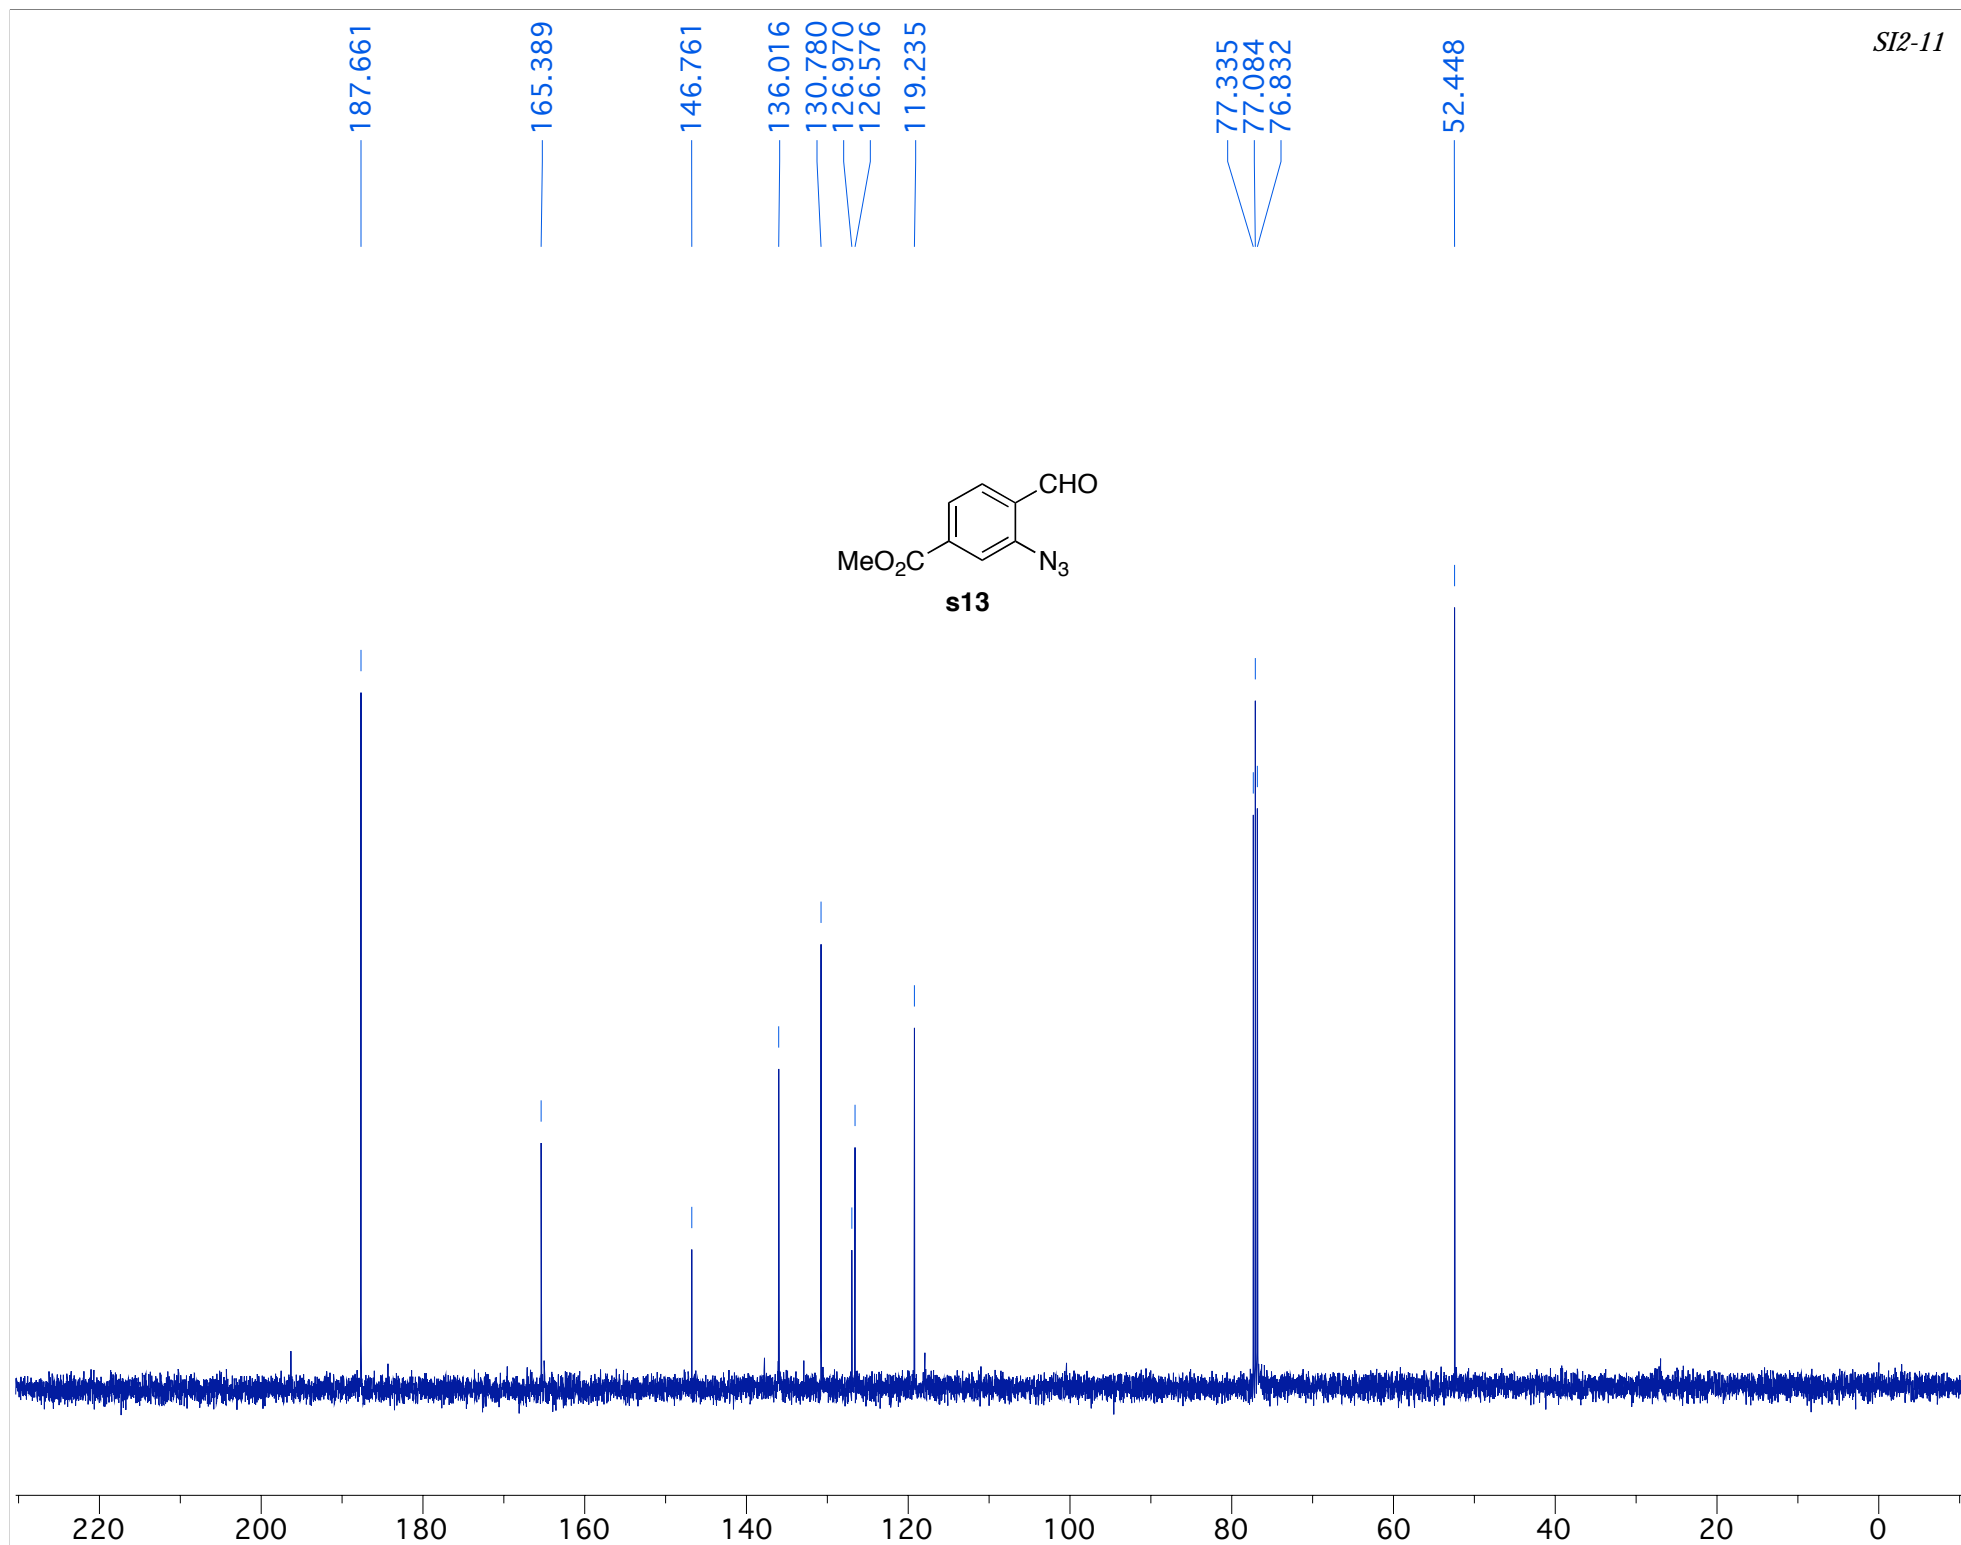

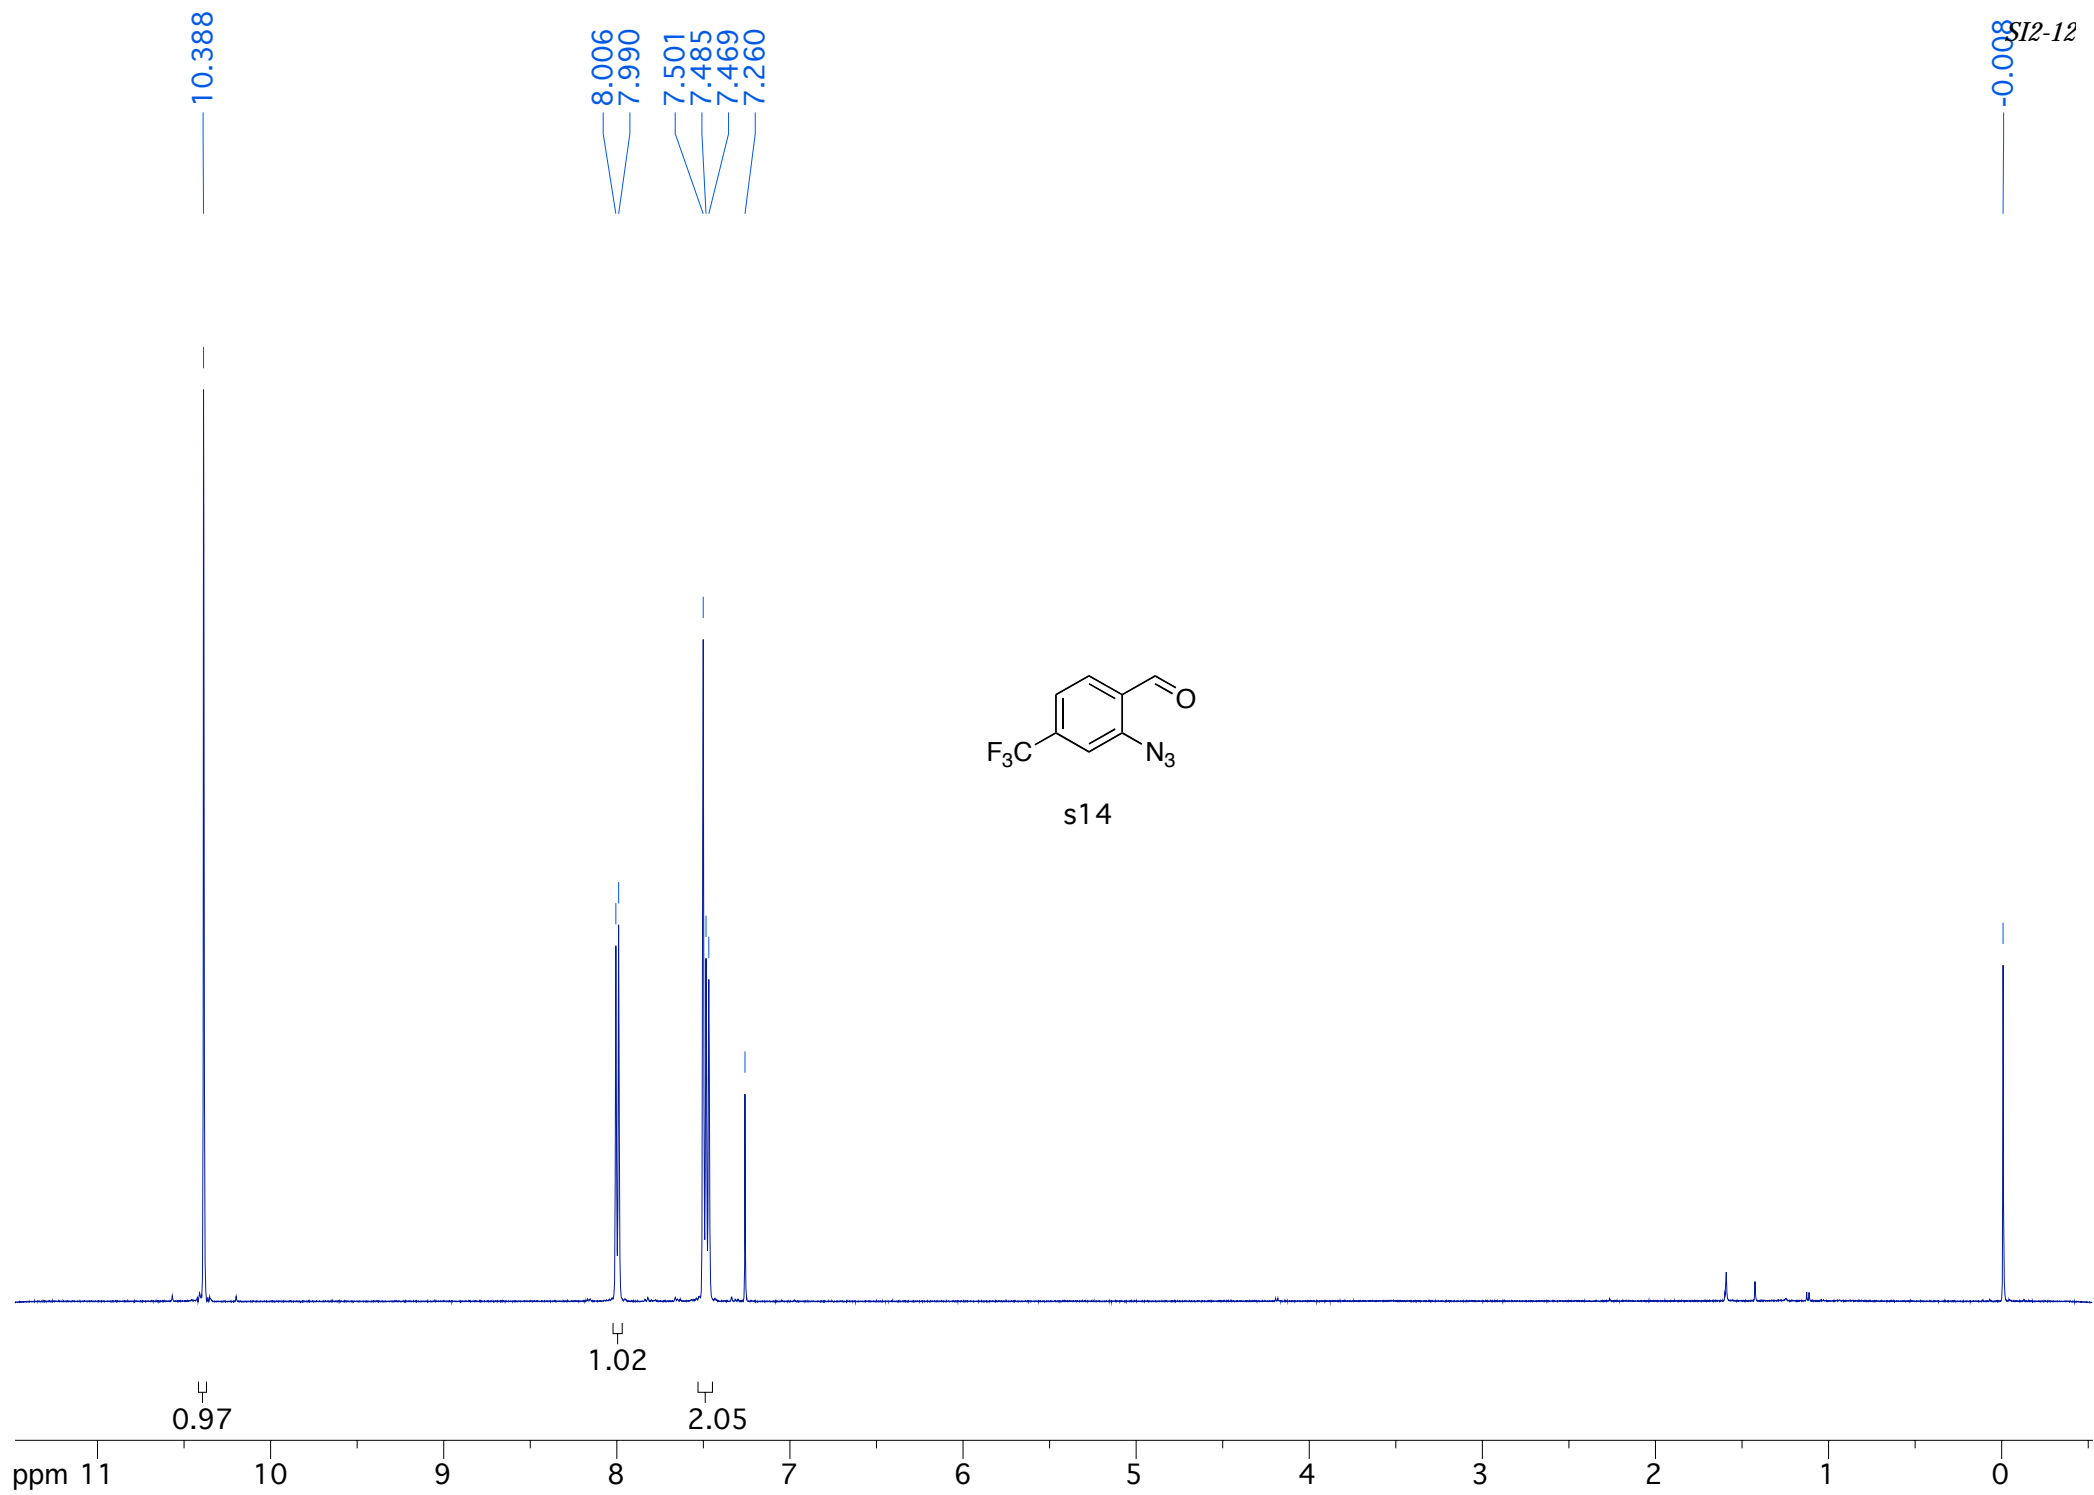

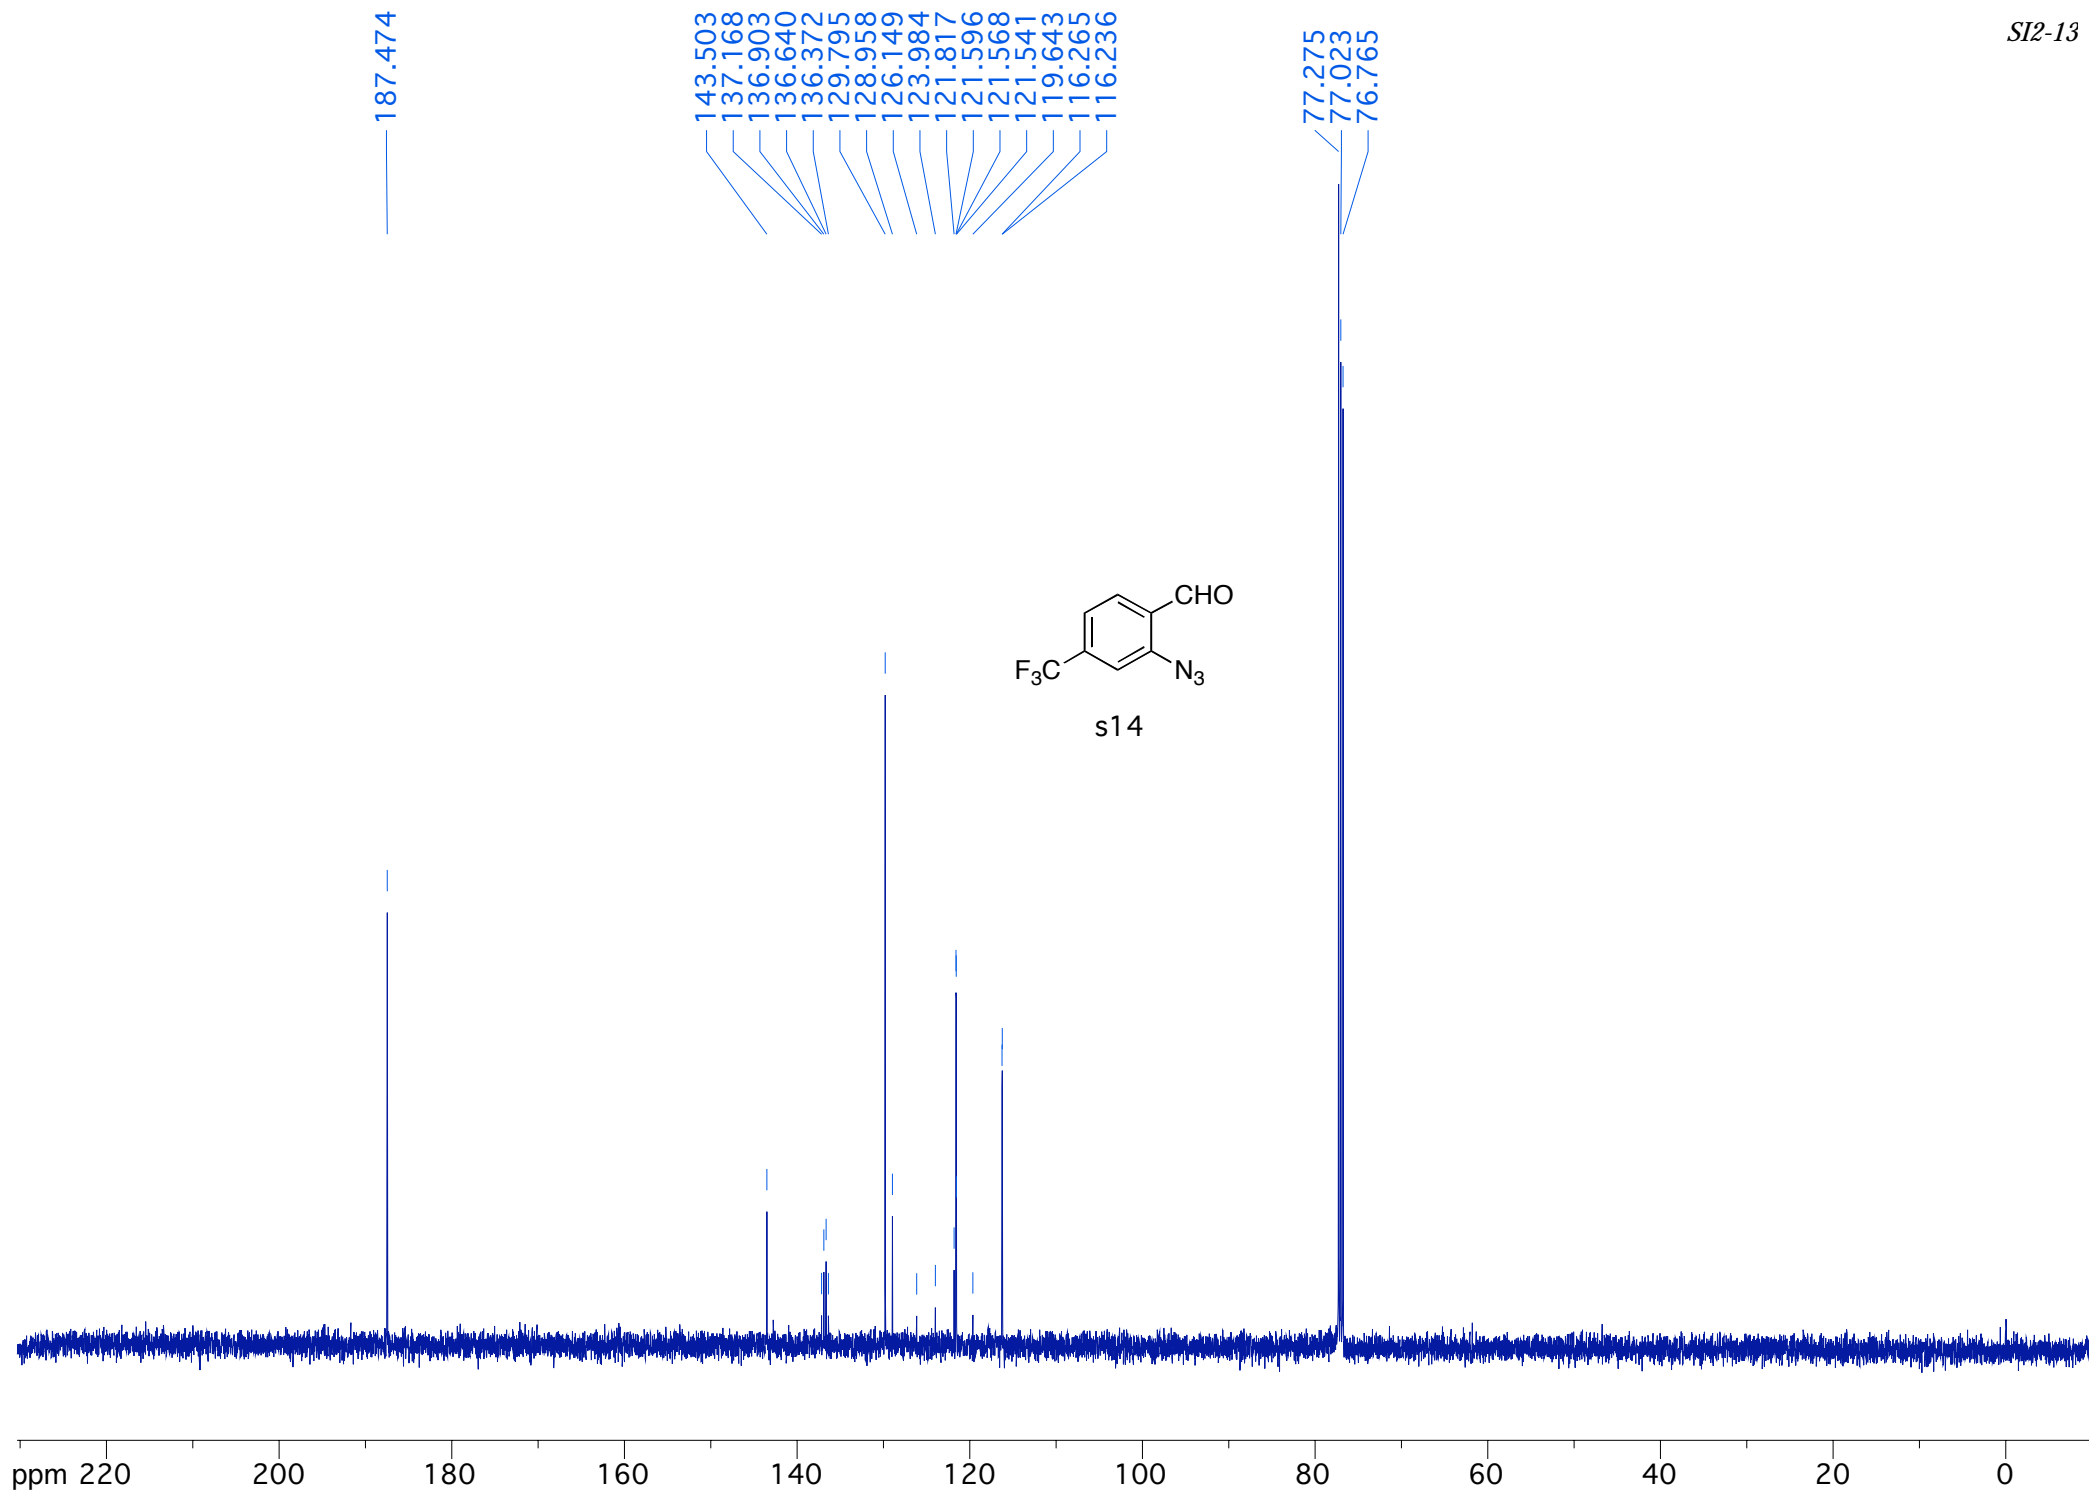

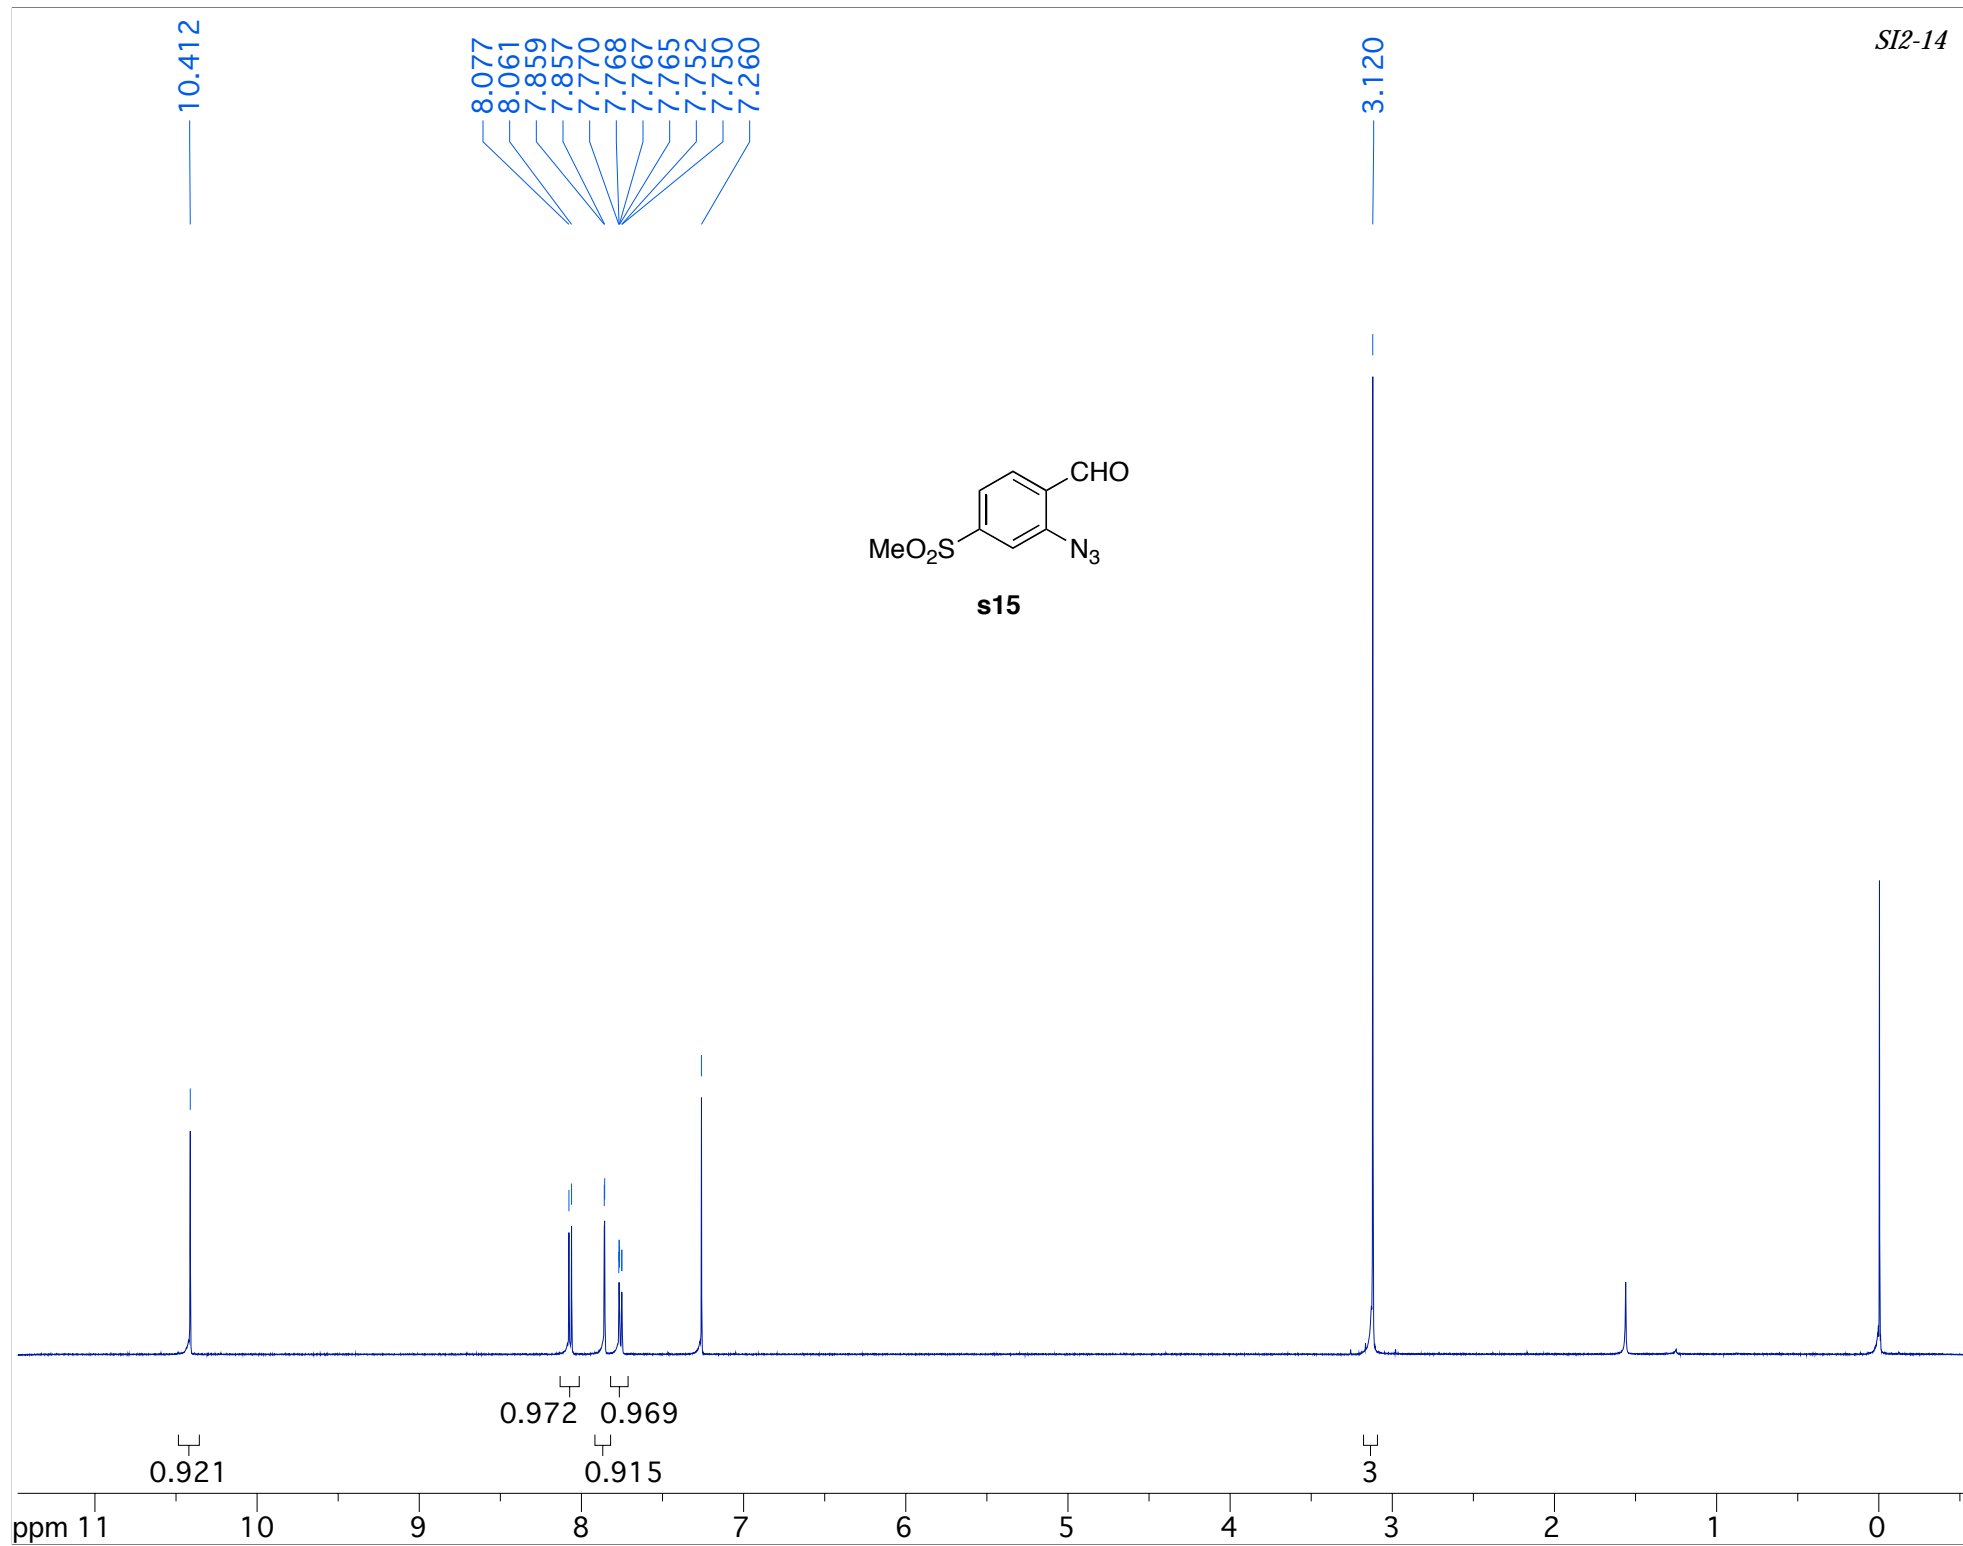

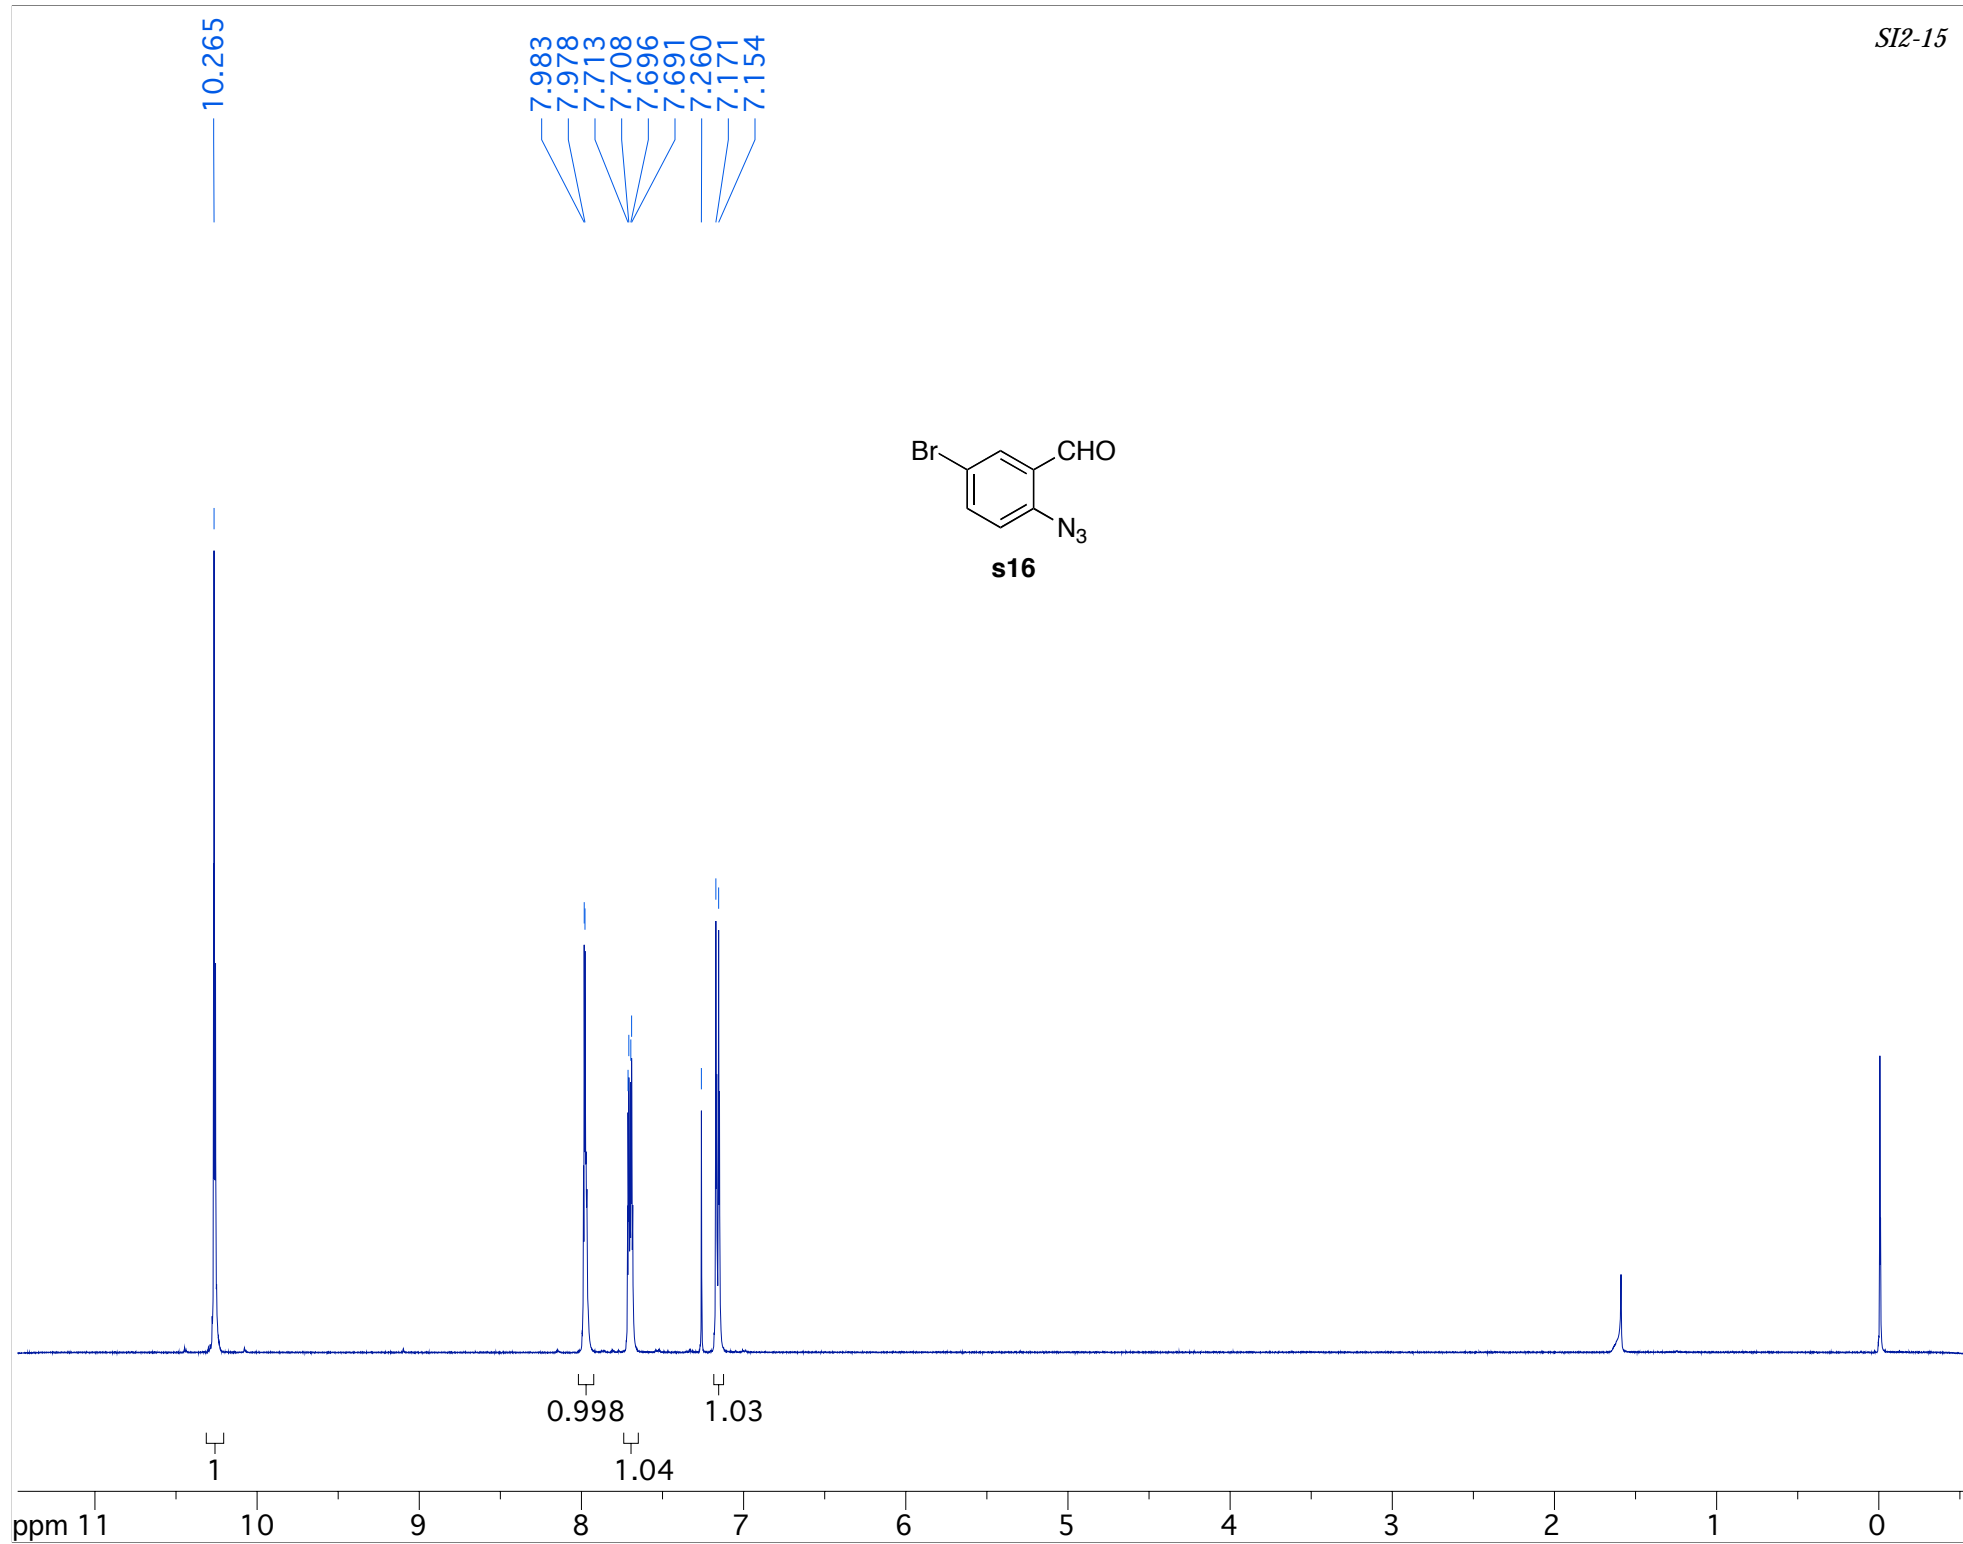

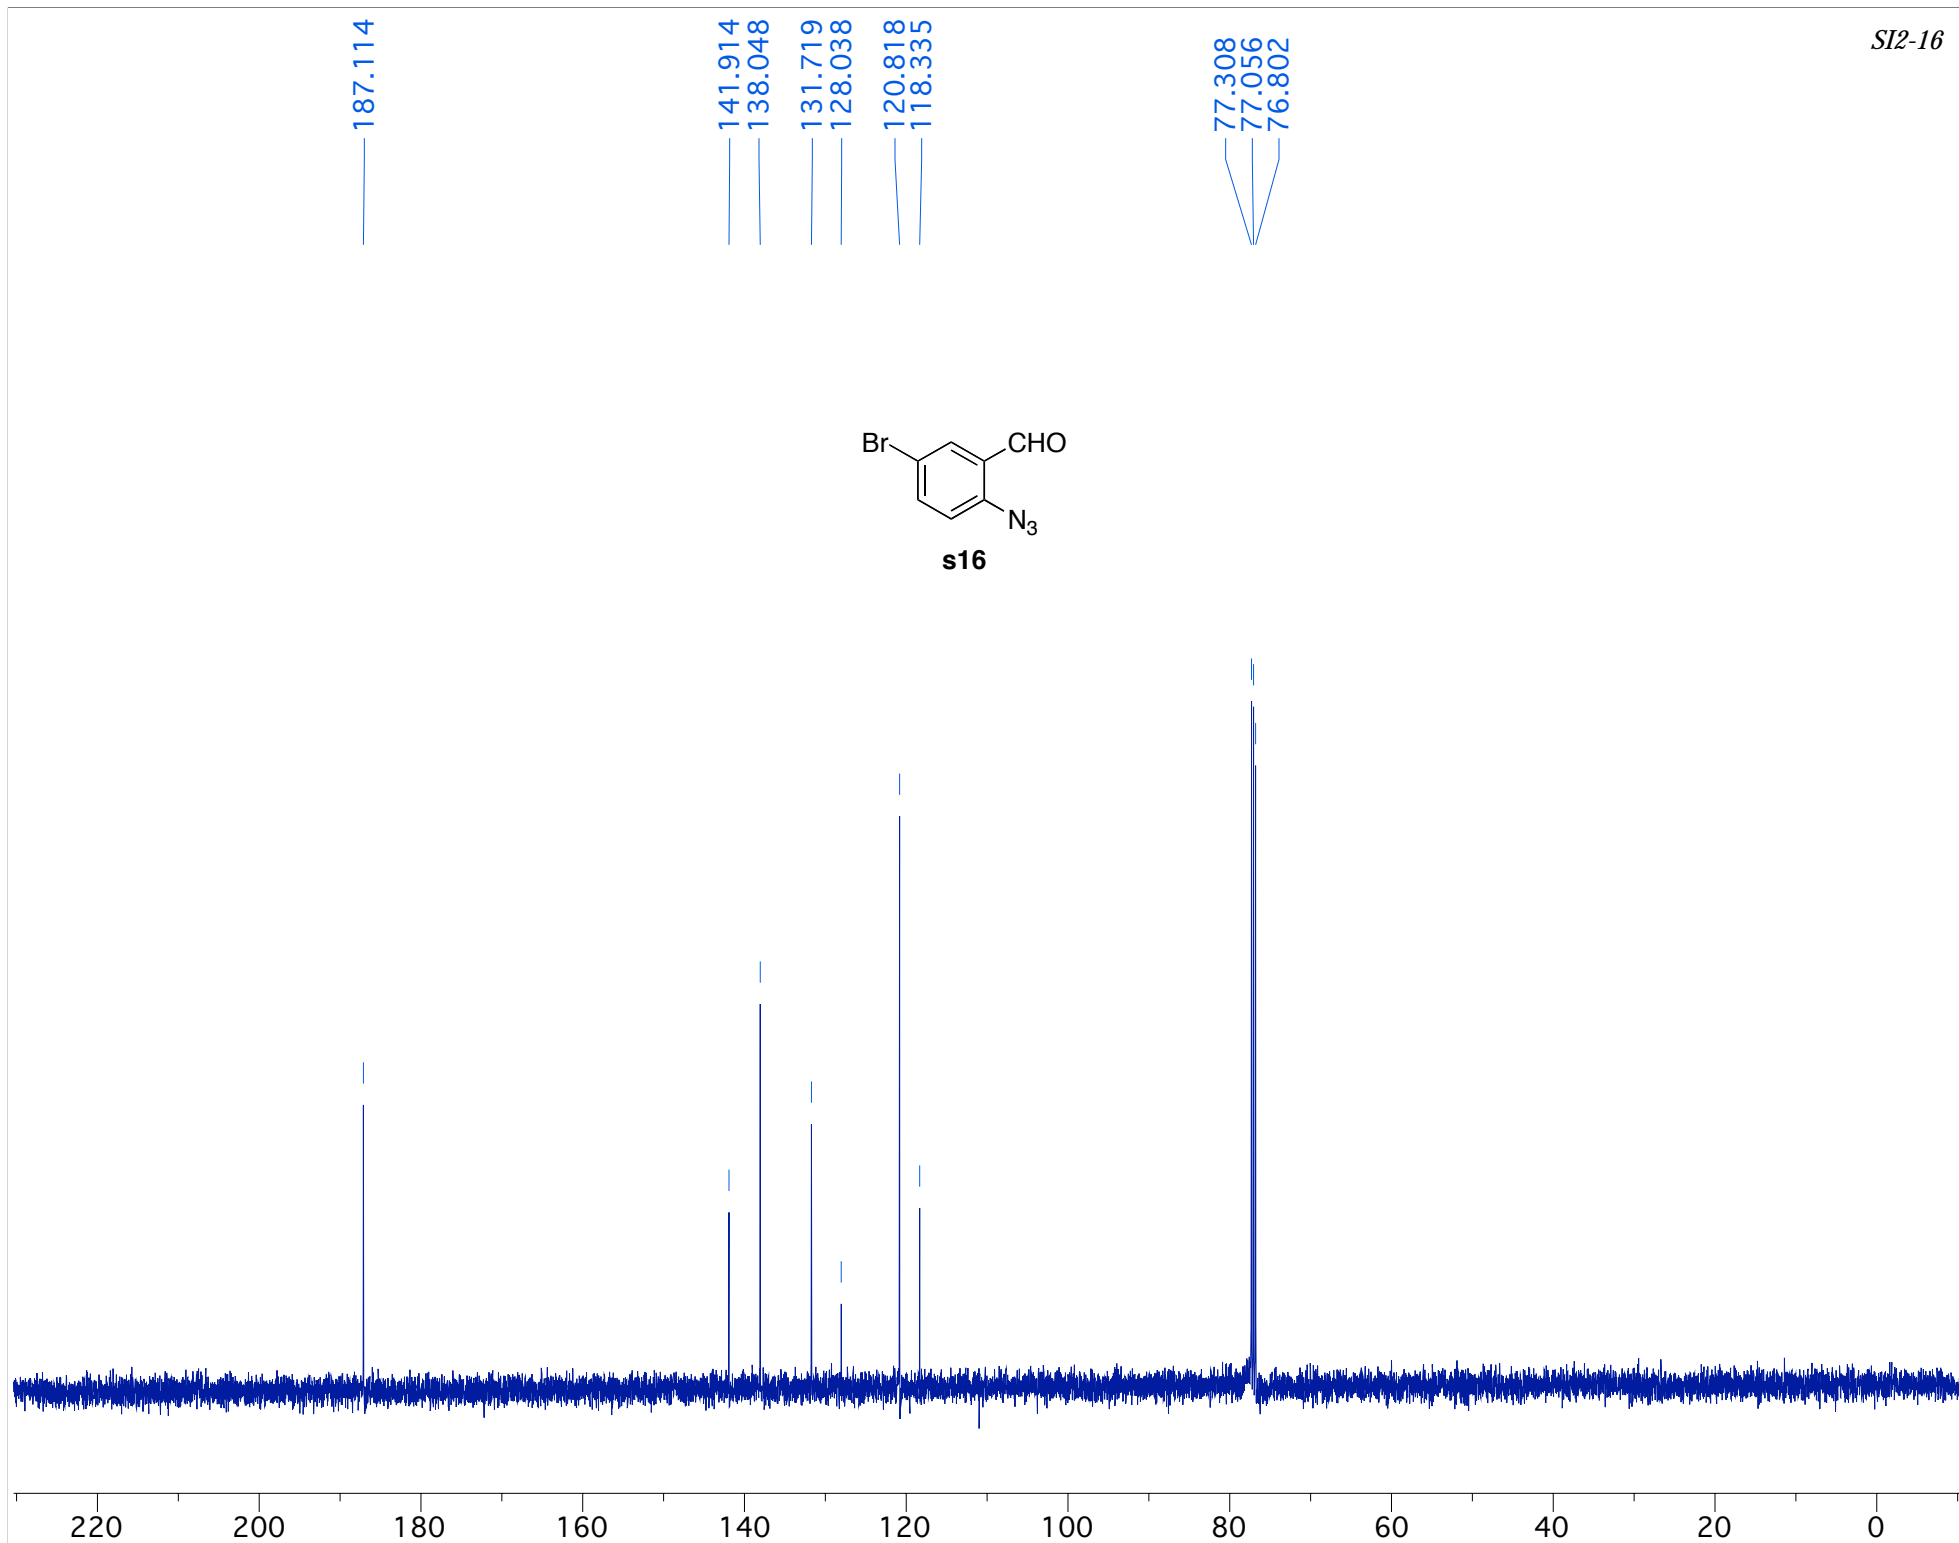



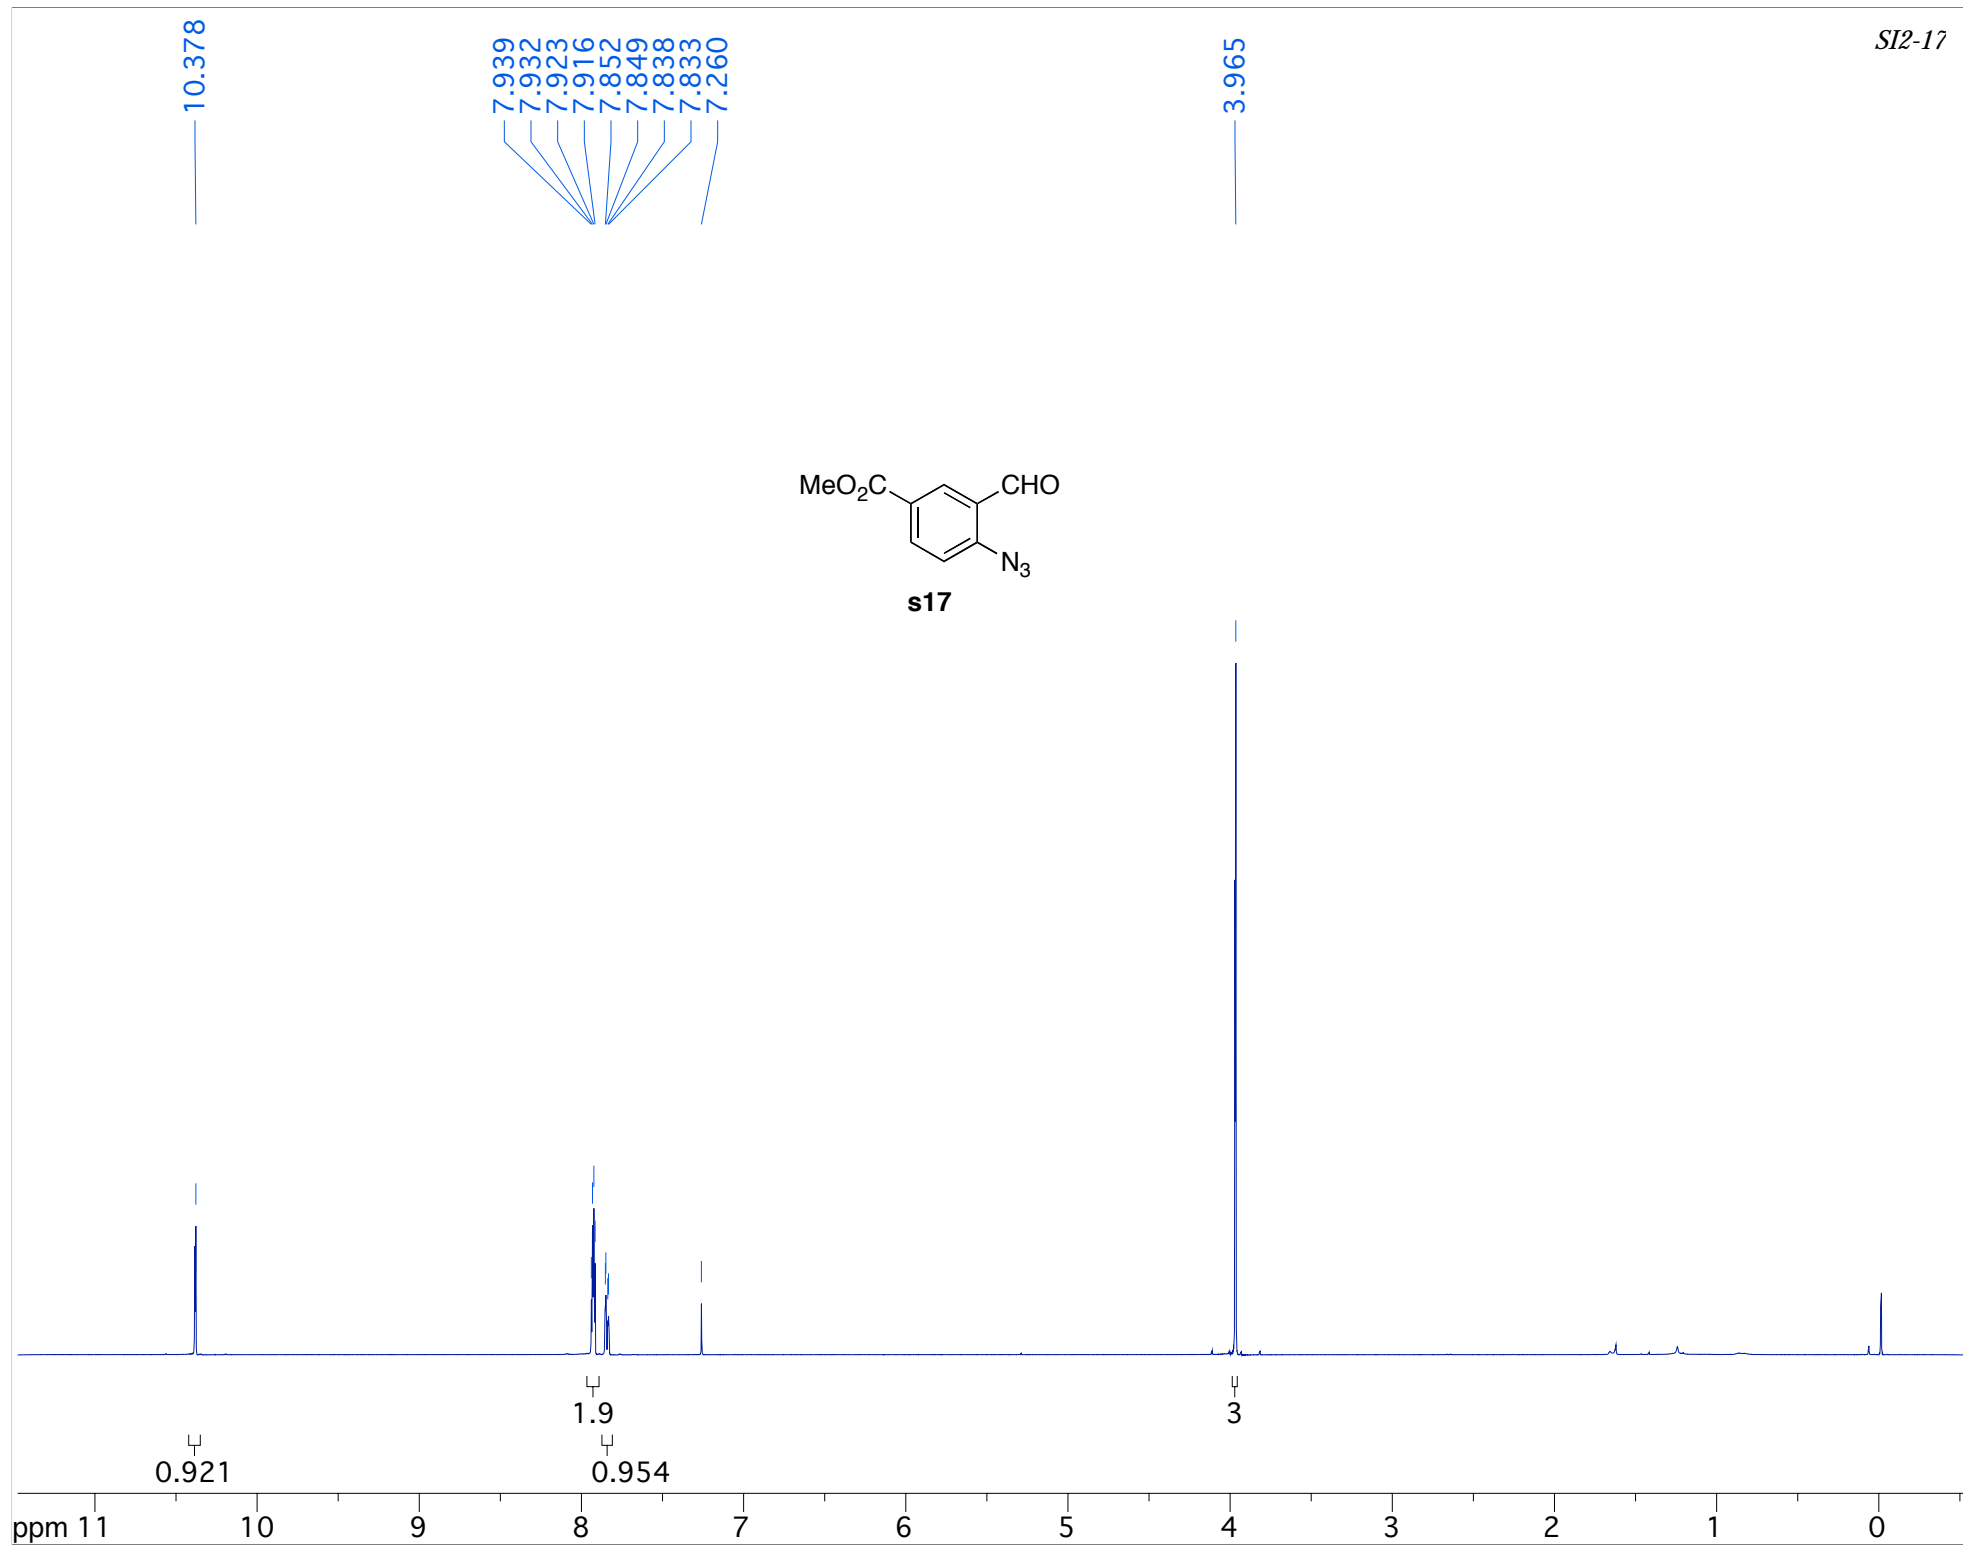

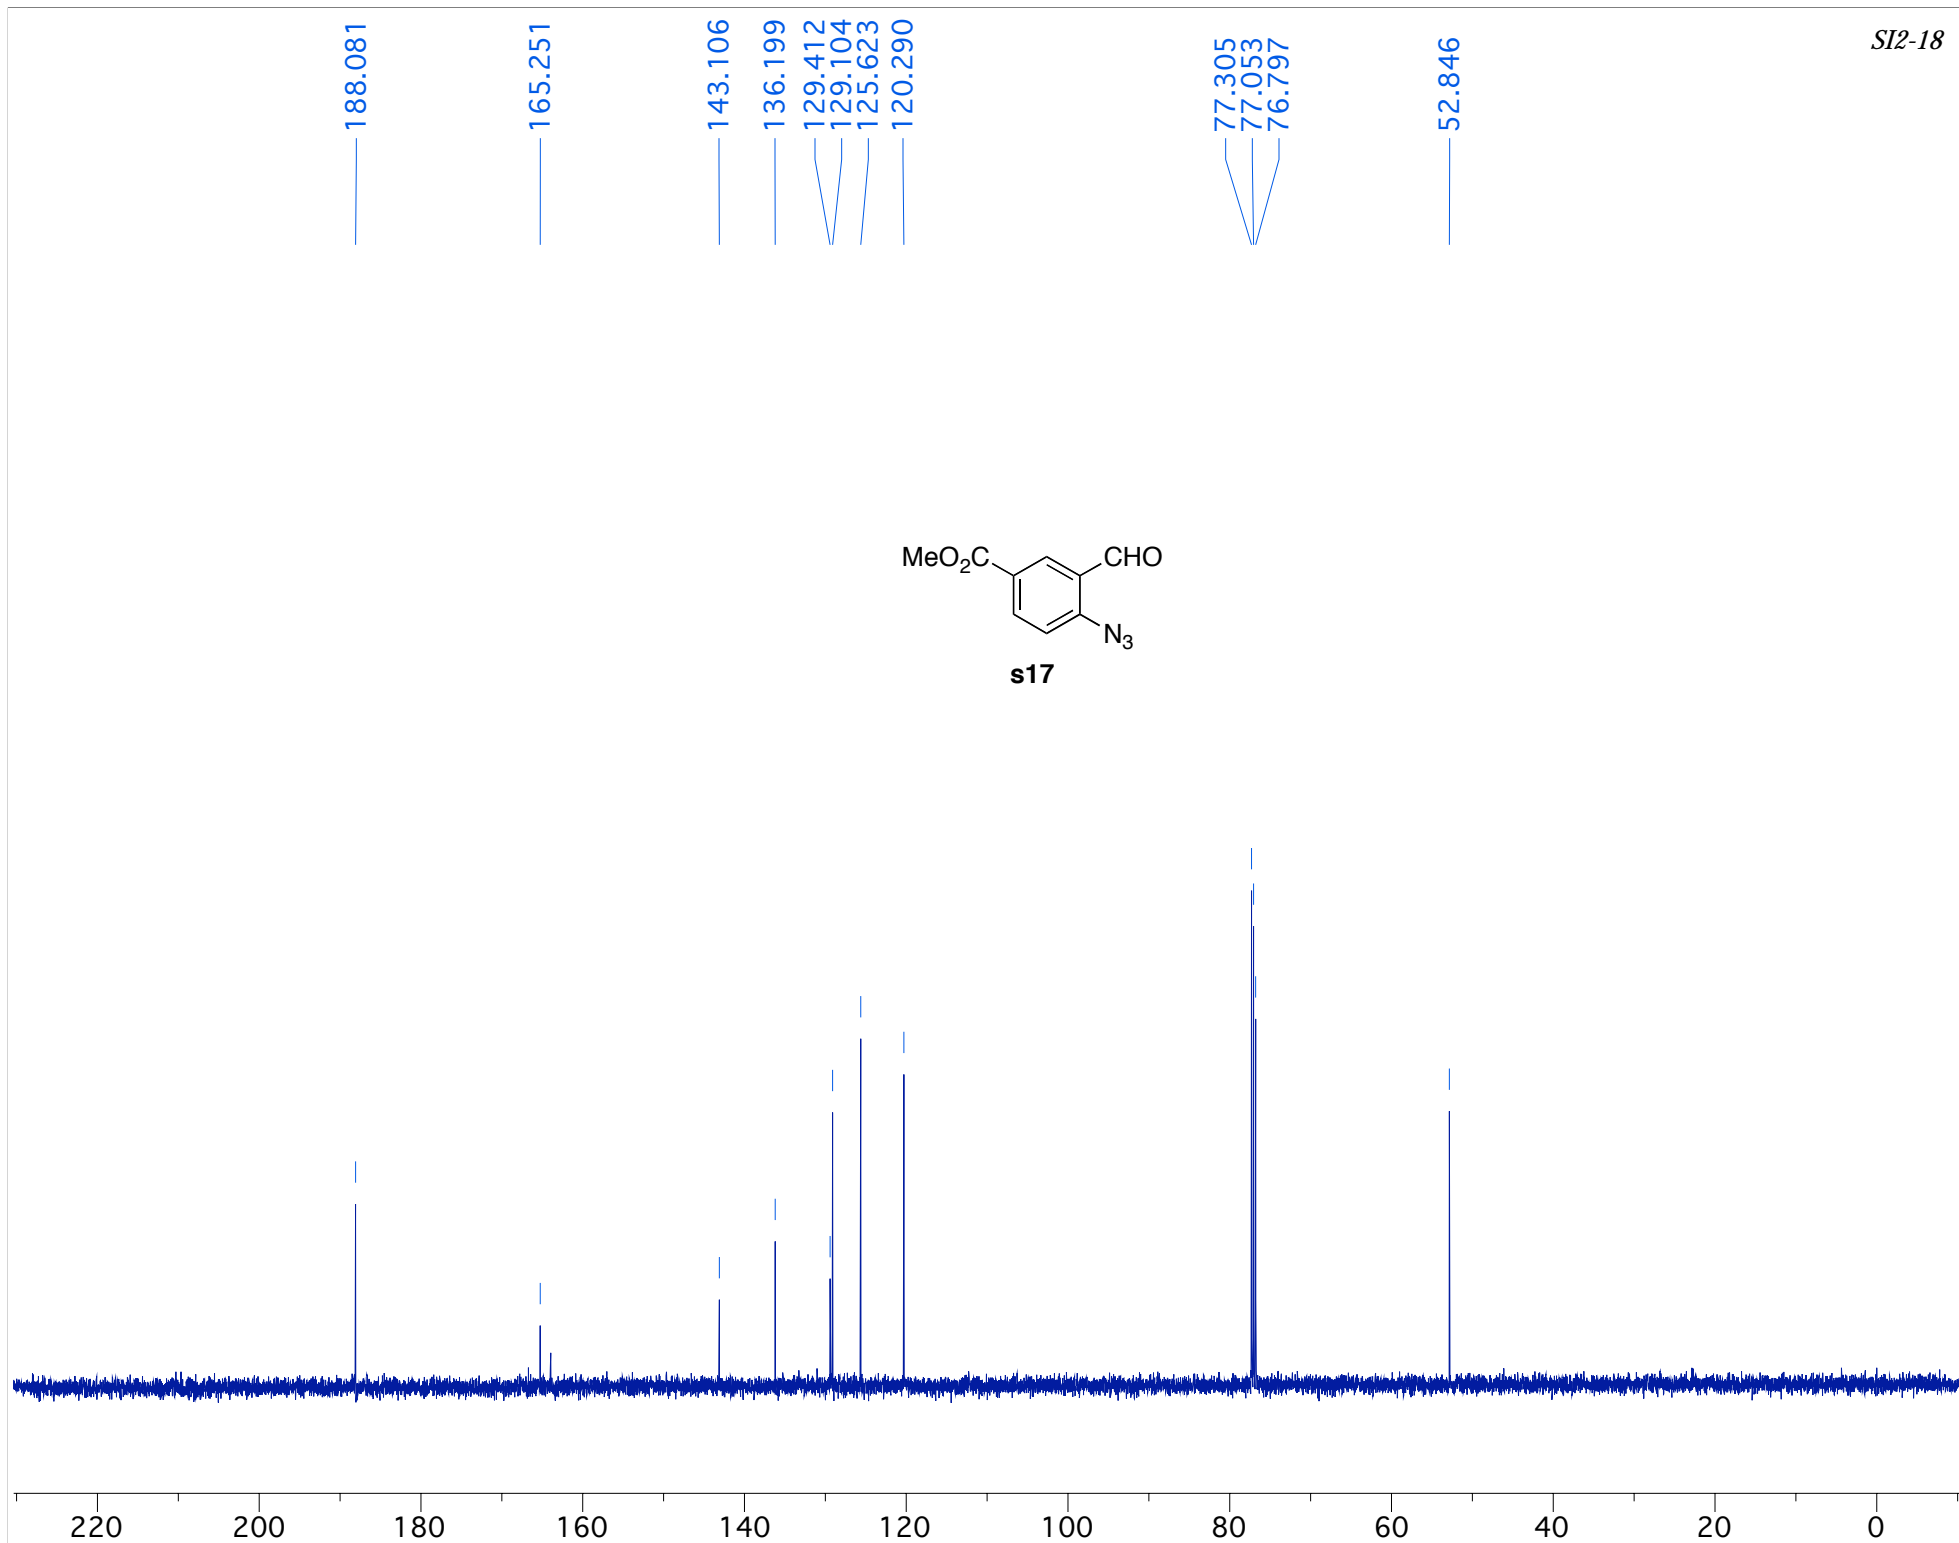

7.798  
7.792  
7.780  
7.373  
7.358  
7.347  
7.331  
7.264  
7.257  
7.256  
7.249  
7.238  
7.222  
7.201  
7.185  
7.171  
7.164  
7.154  
7.140  
7.125  
7.080  
7.065  
6.977  
6.963  
6.947  
6.879  
6.878  
6.863  
6.849  
6.848  
6.427

2.963  
2.950  
2.937  
2.924  
2.912  
2.899  
2.725  
2.713  
2.701  
2.644  
2.632  
2.619  
2.100  
2.087  
2.074  
2.061  
2.049  
1.921  
1.908  
1.896  
1.884  
1.871

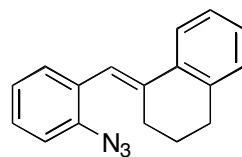

8

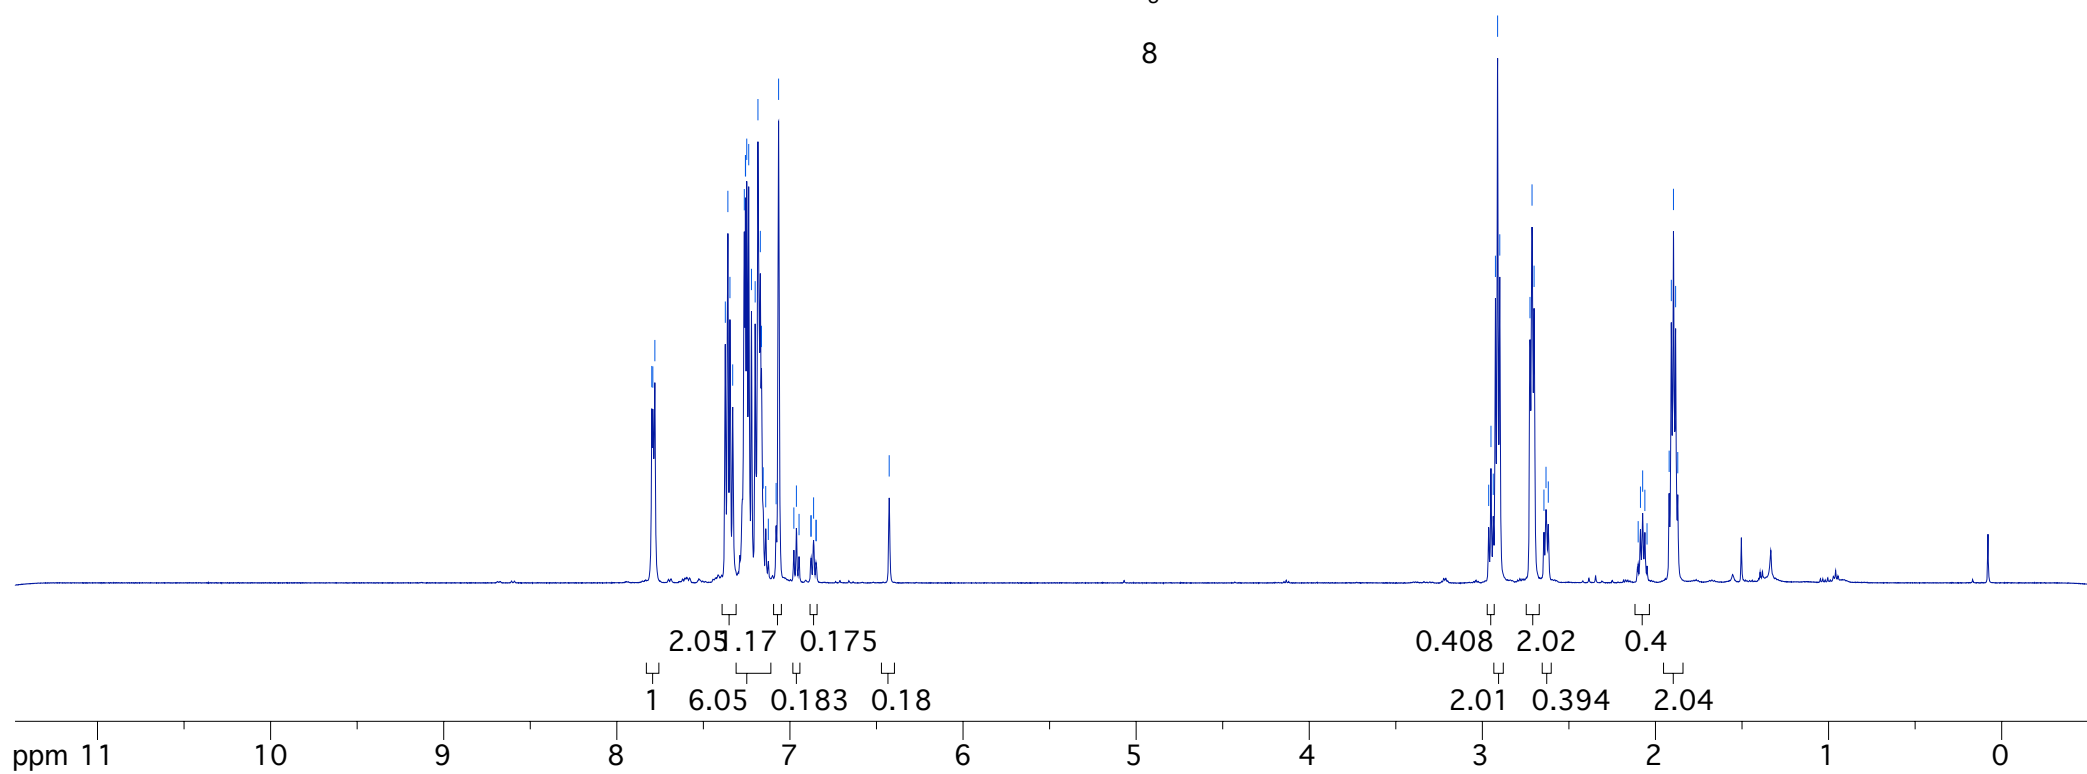

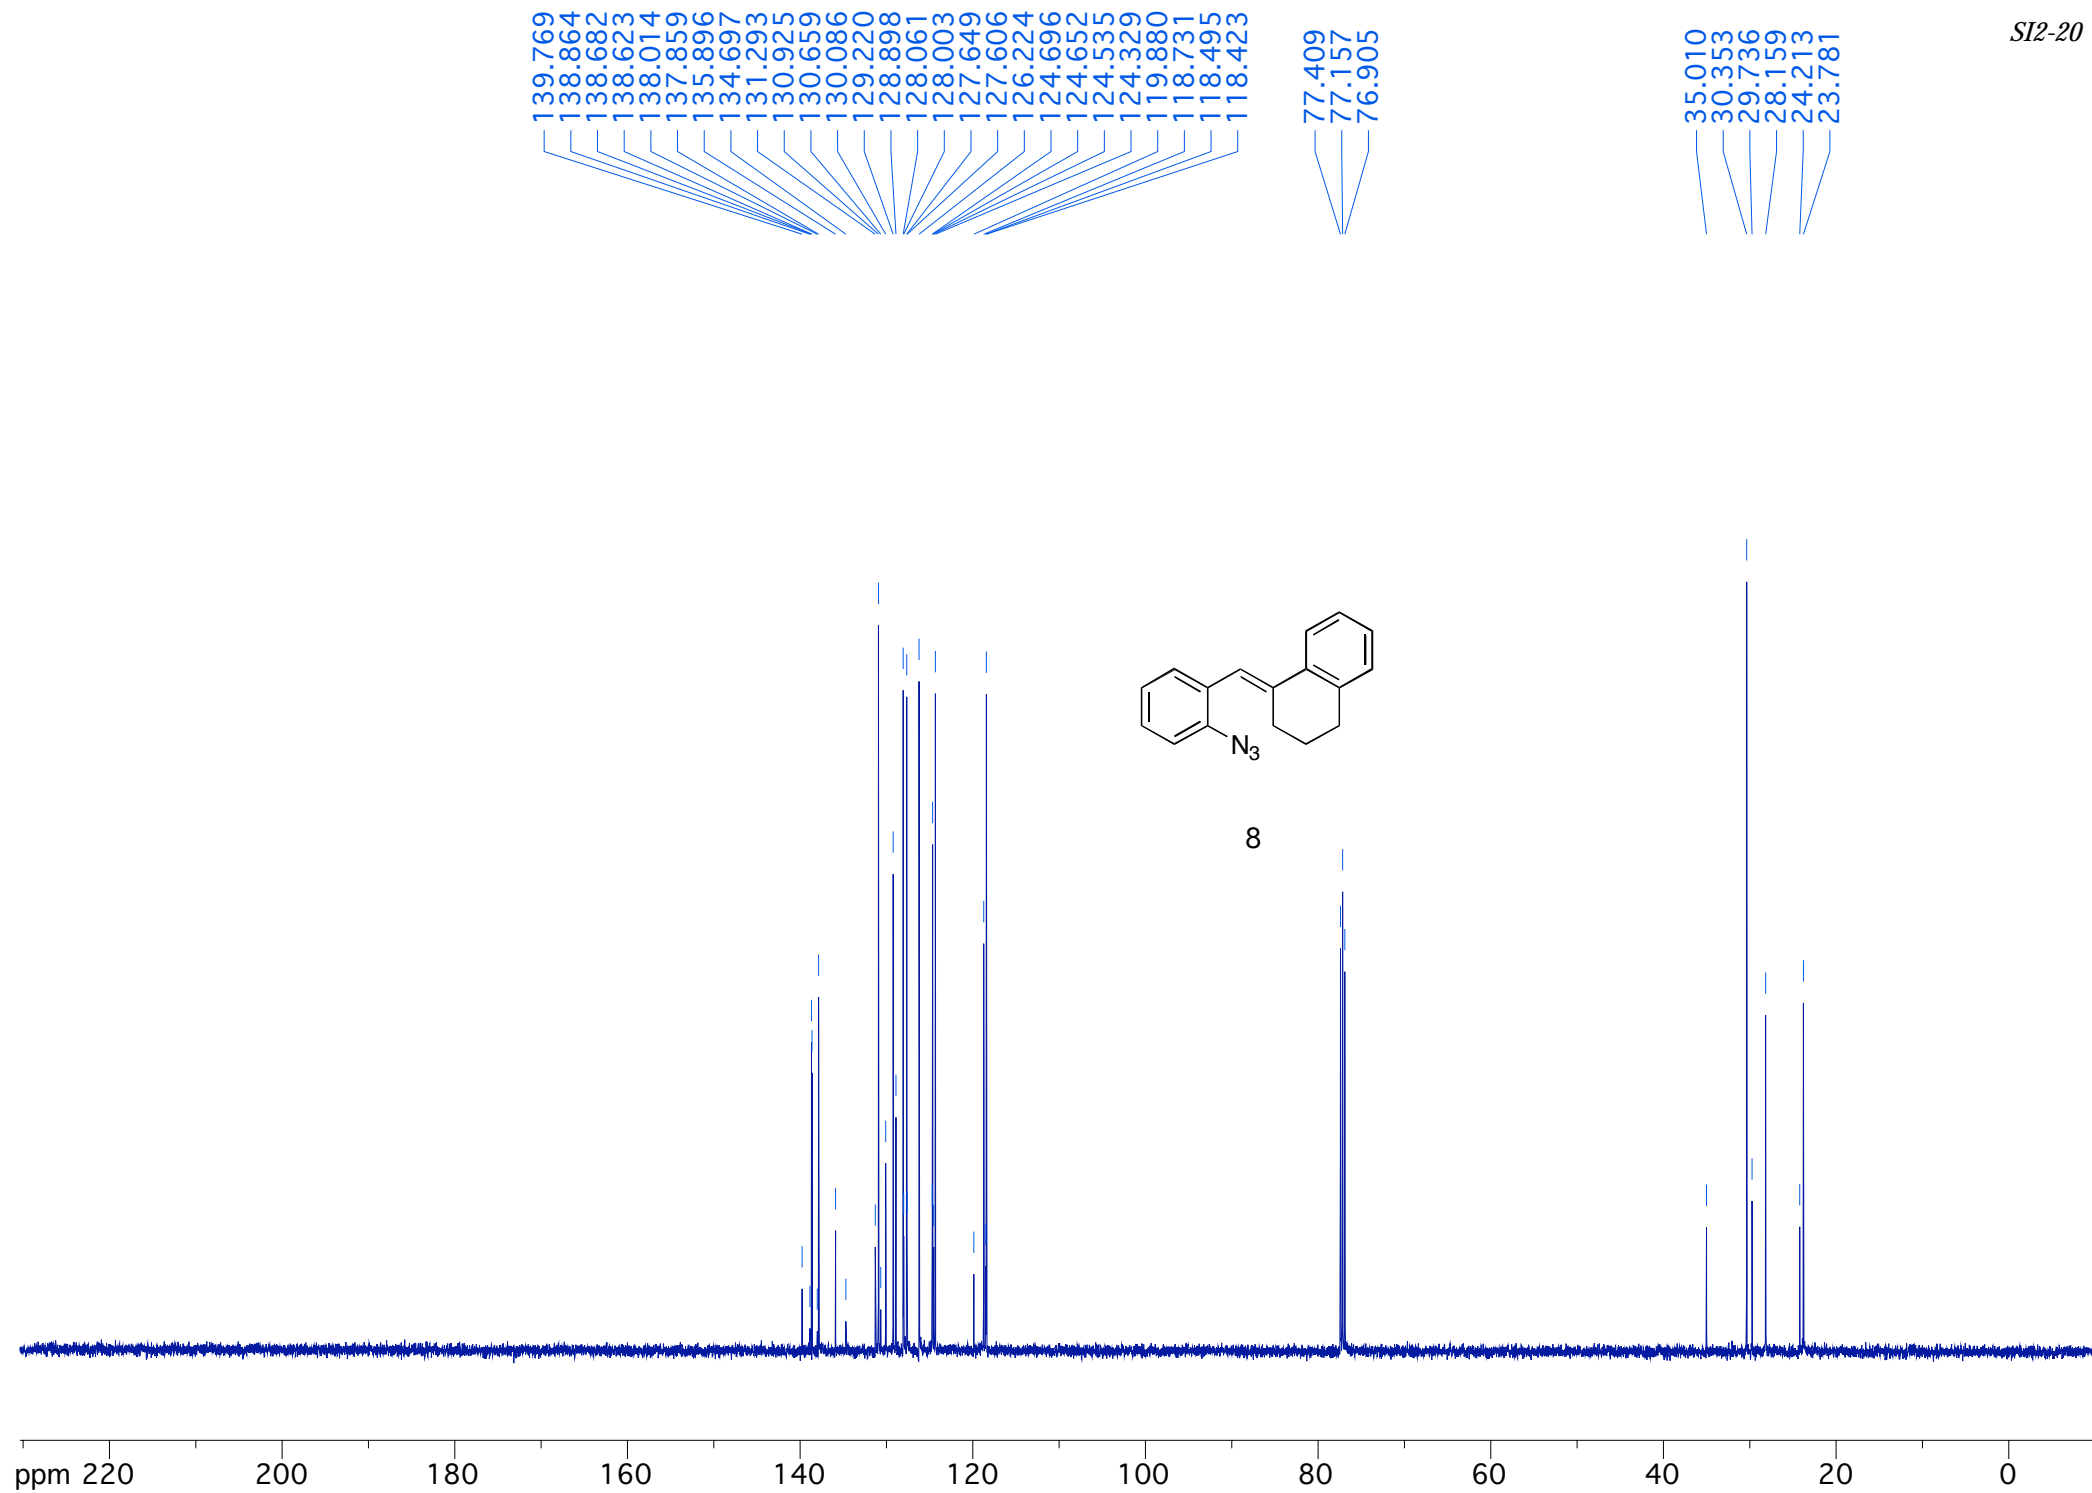

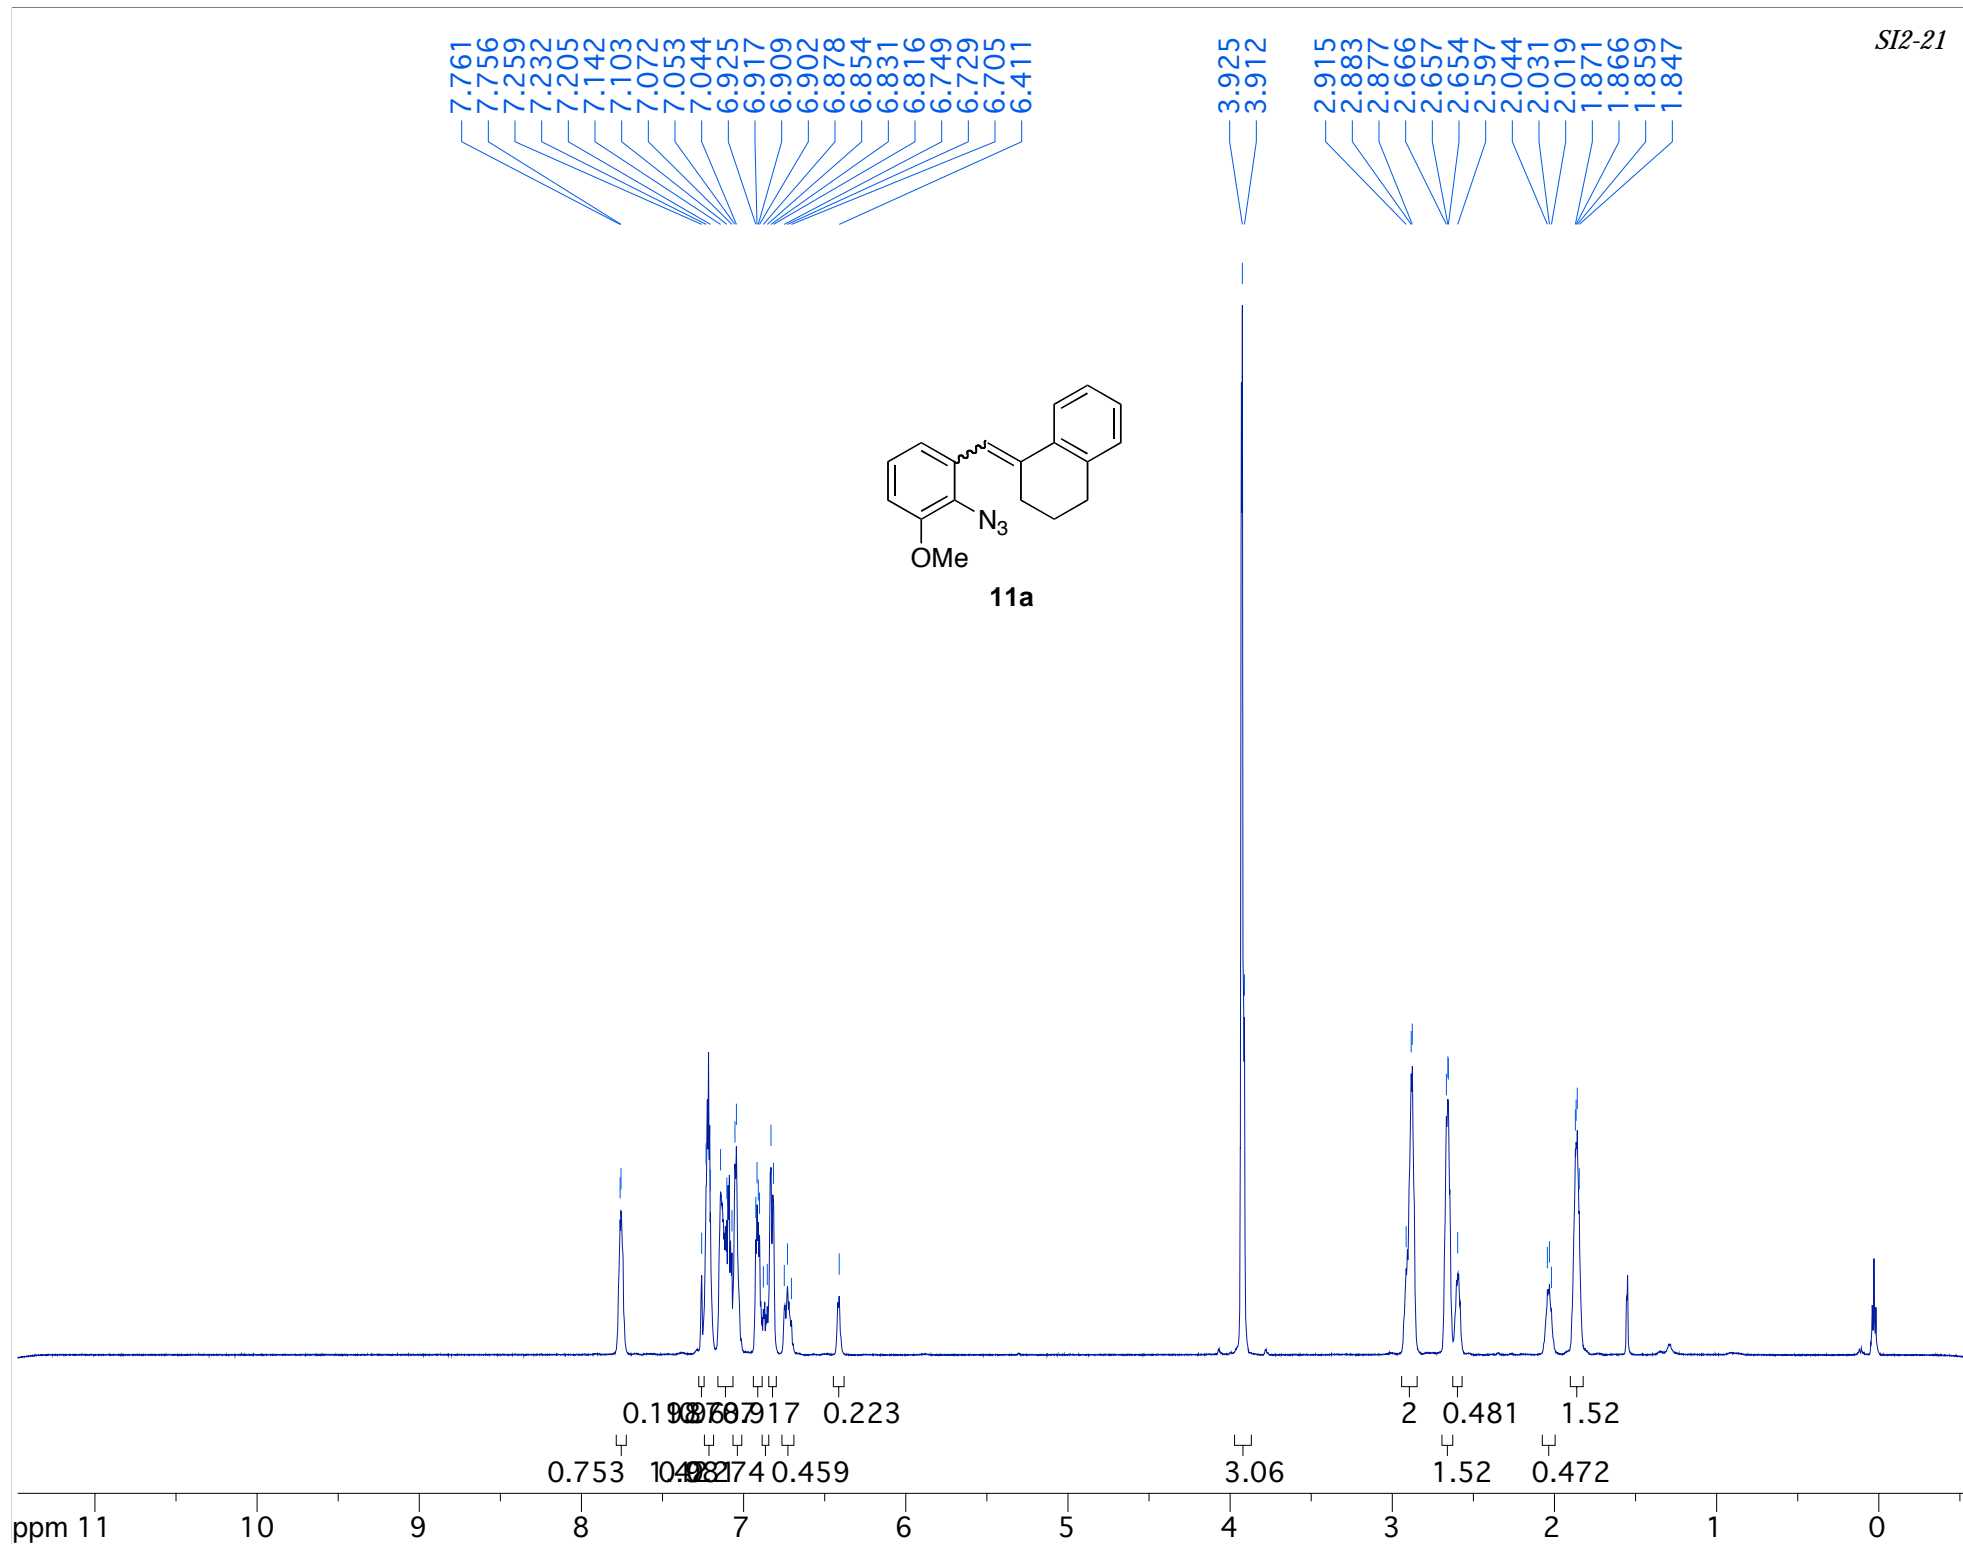

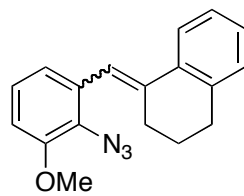

11a

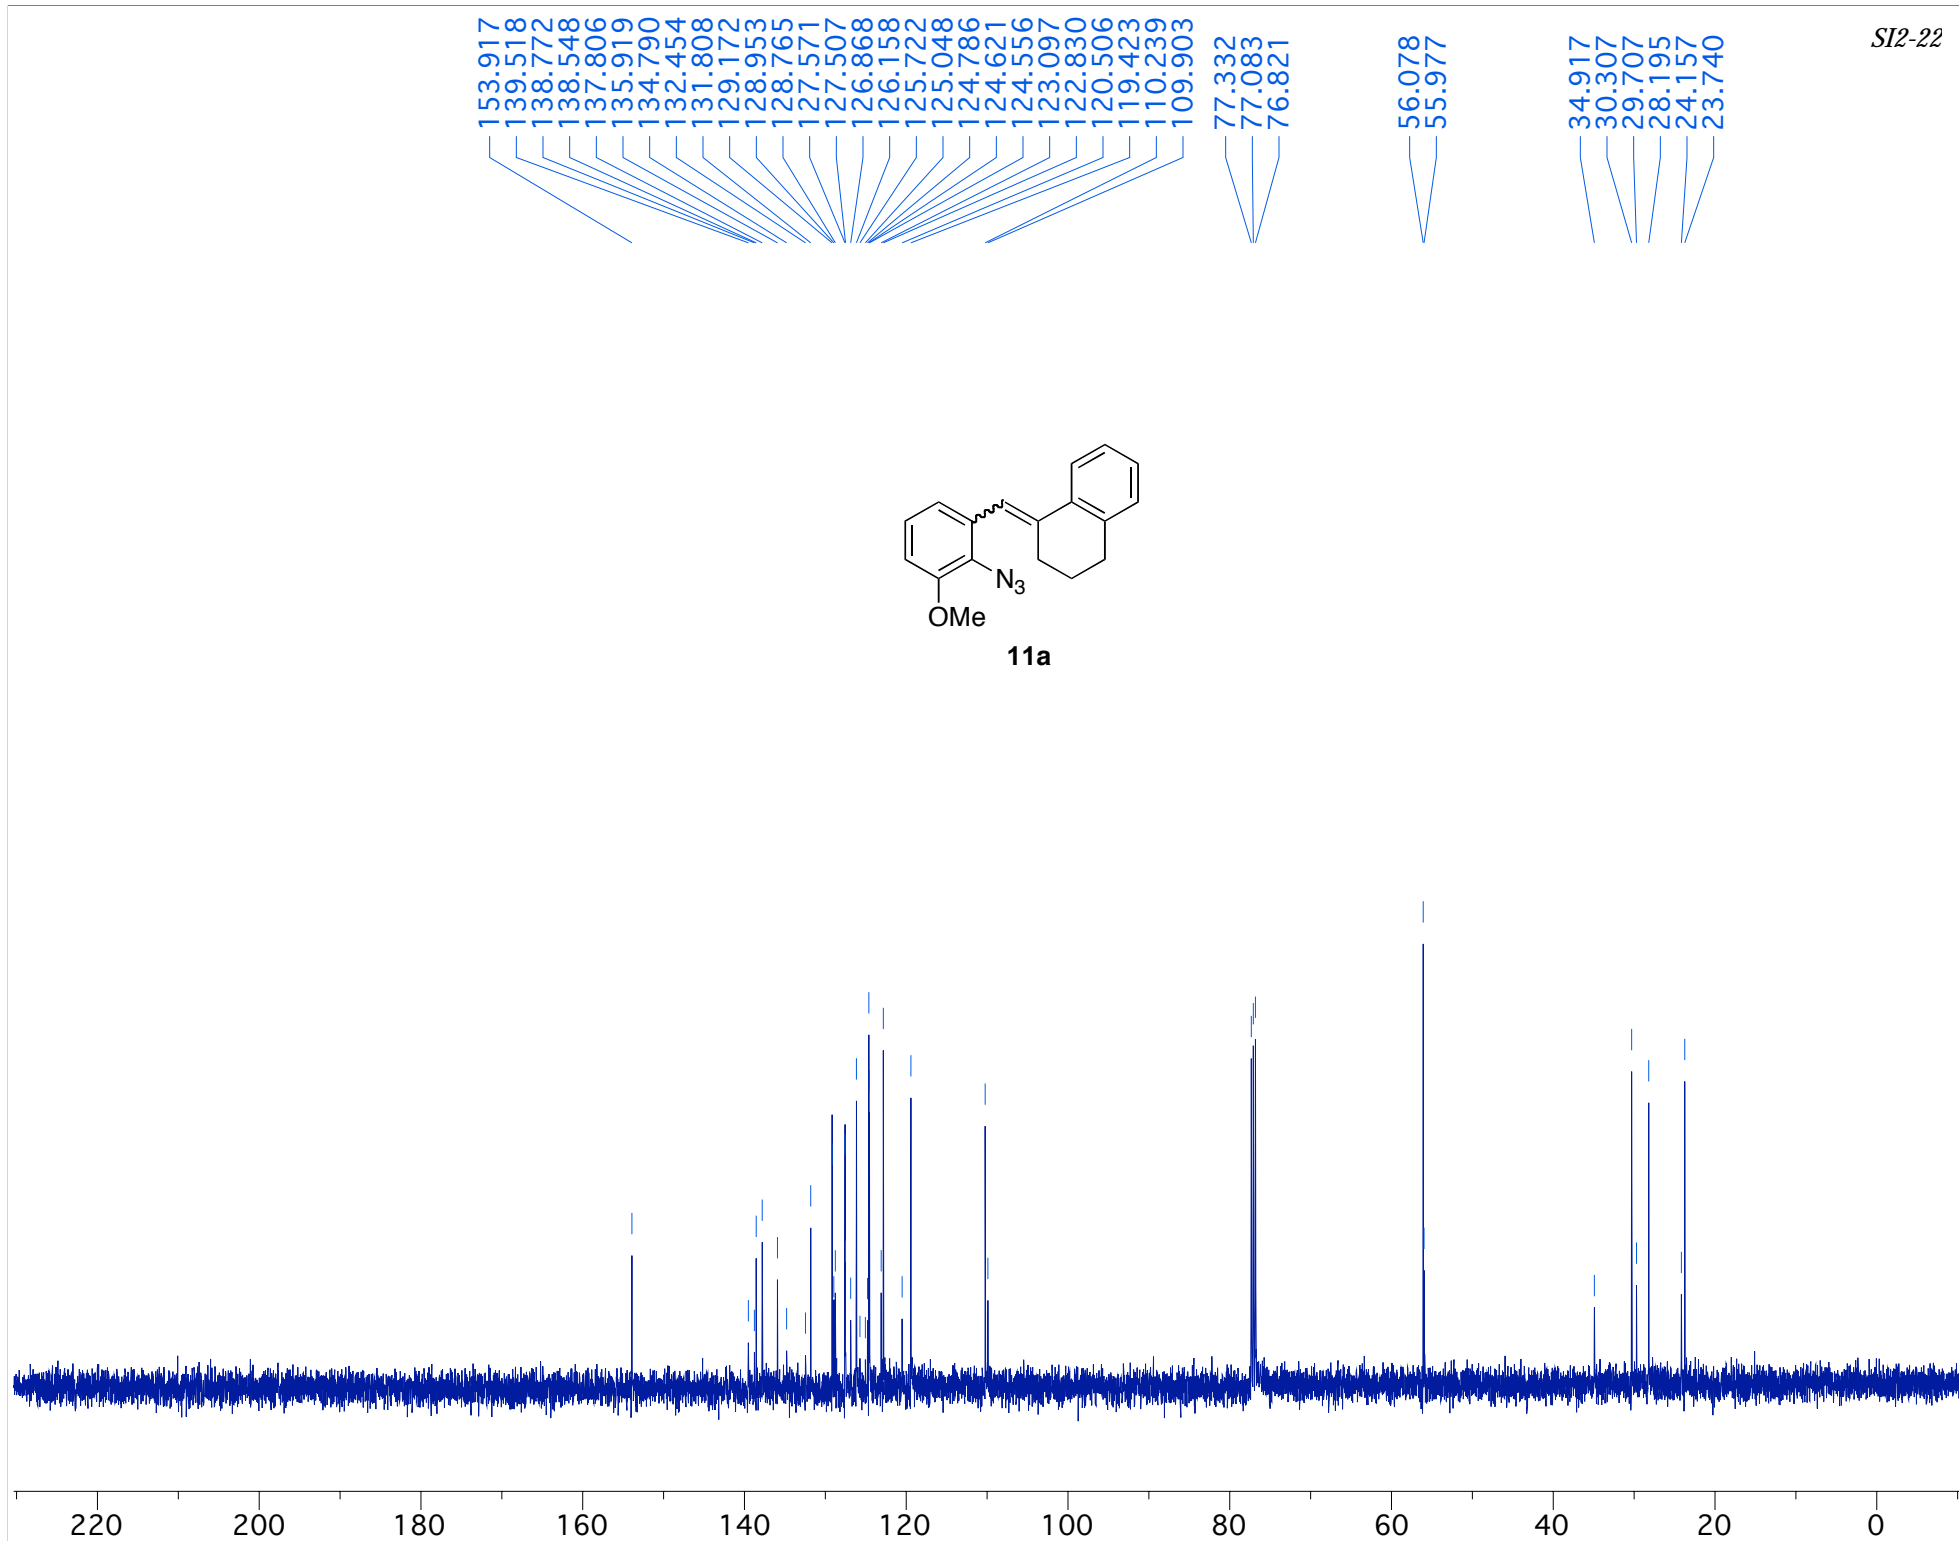

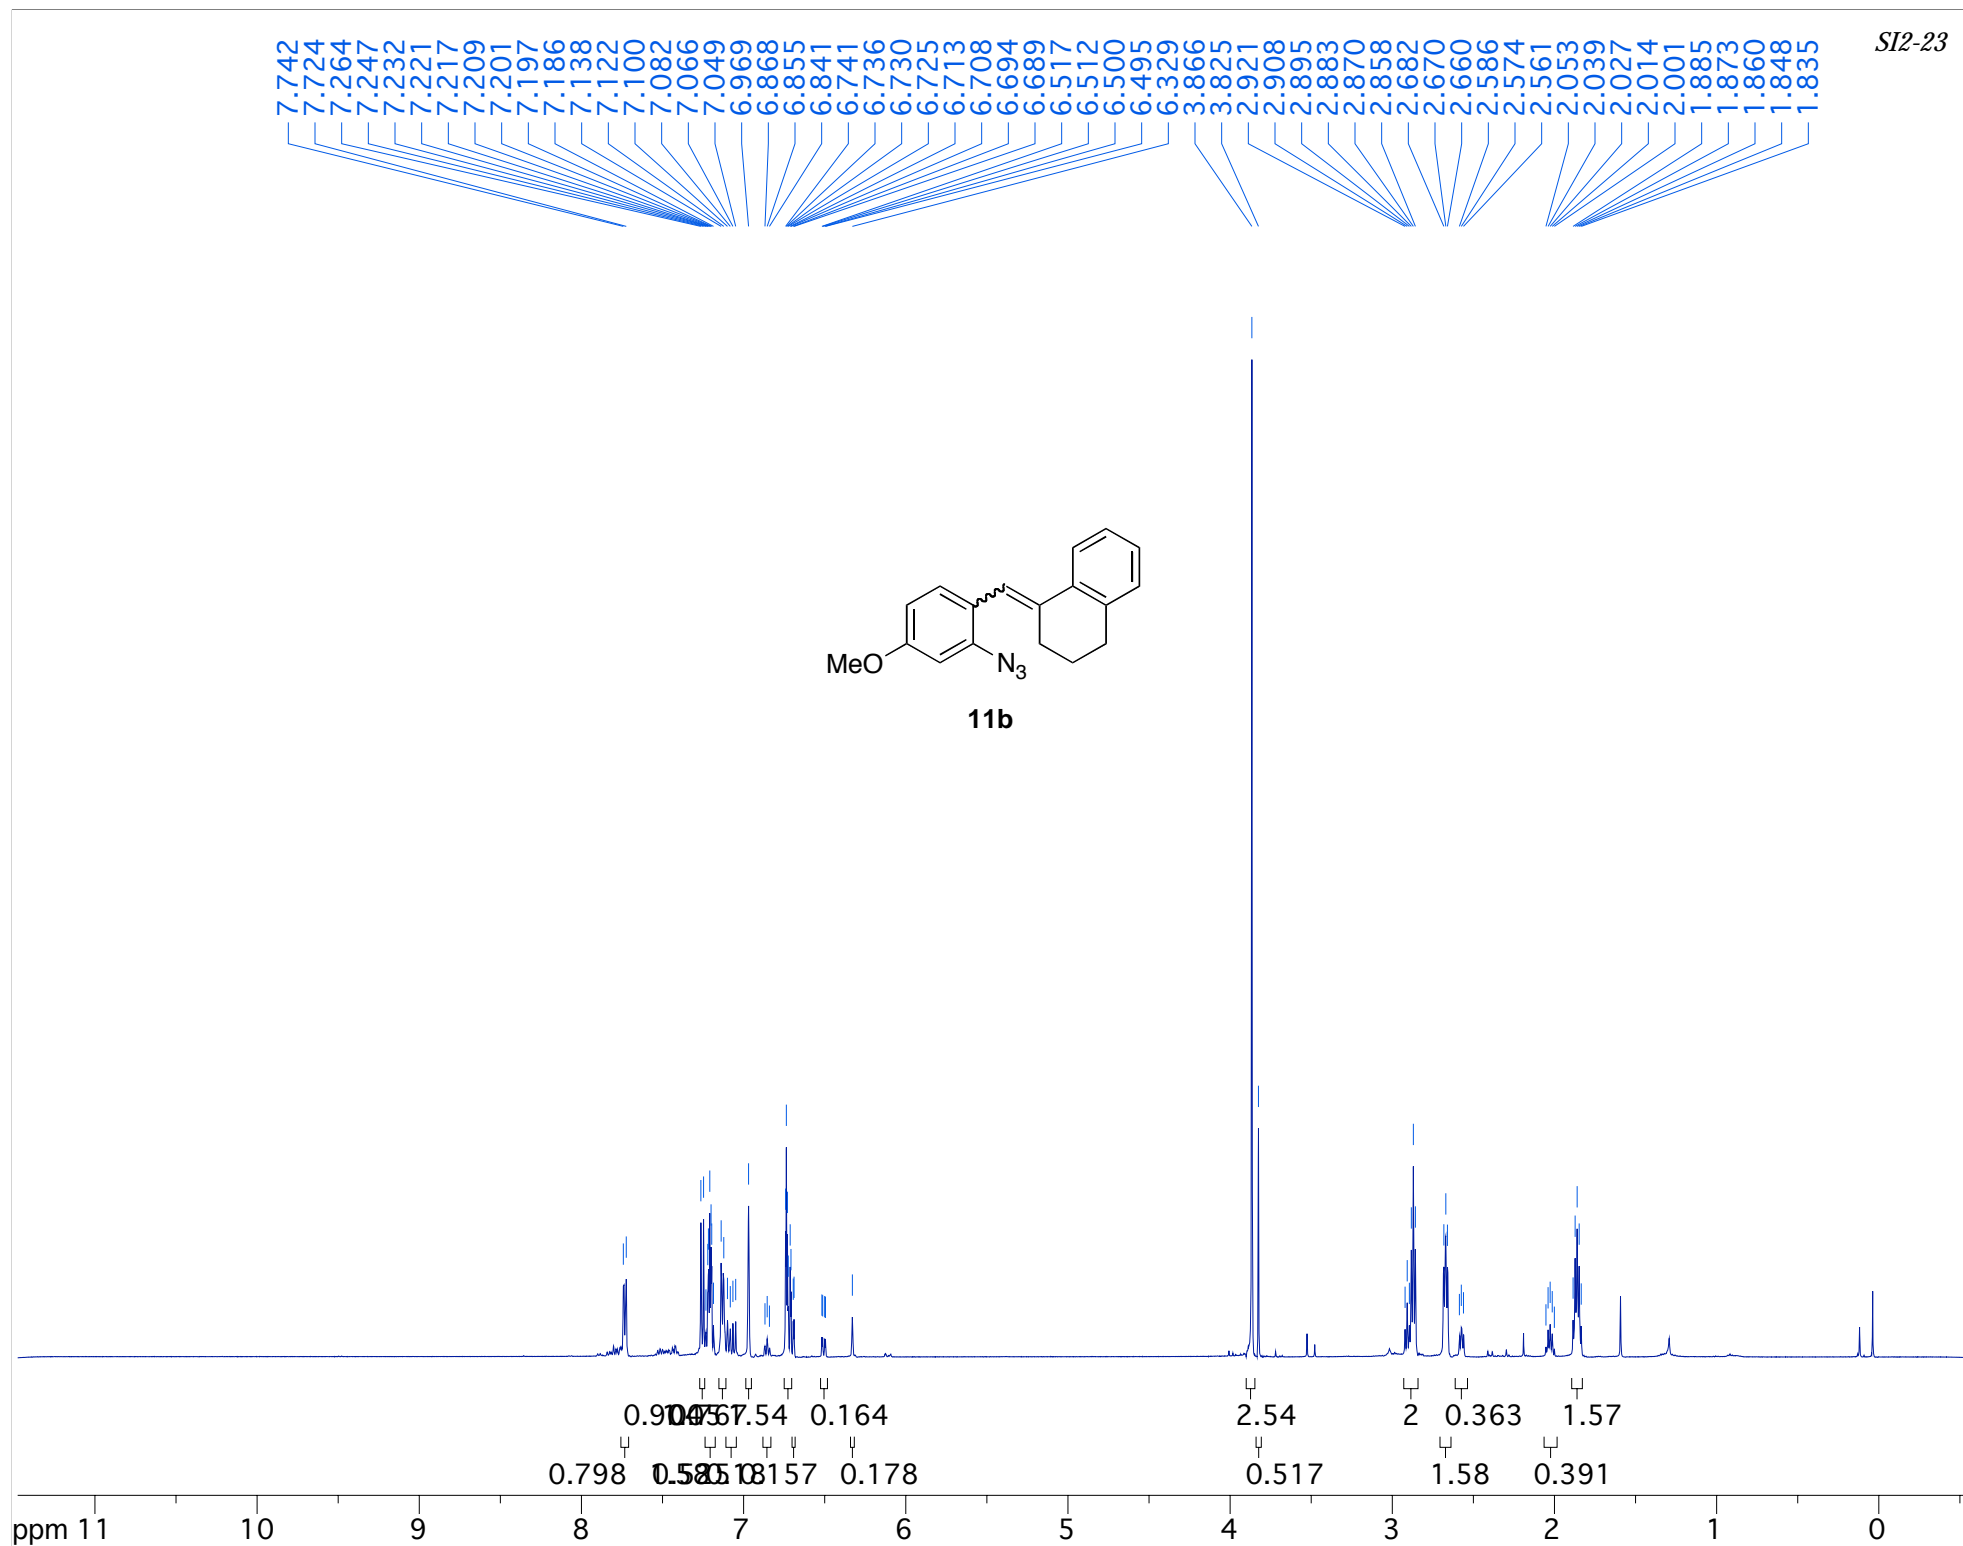

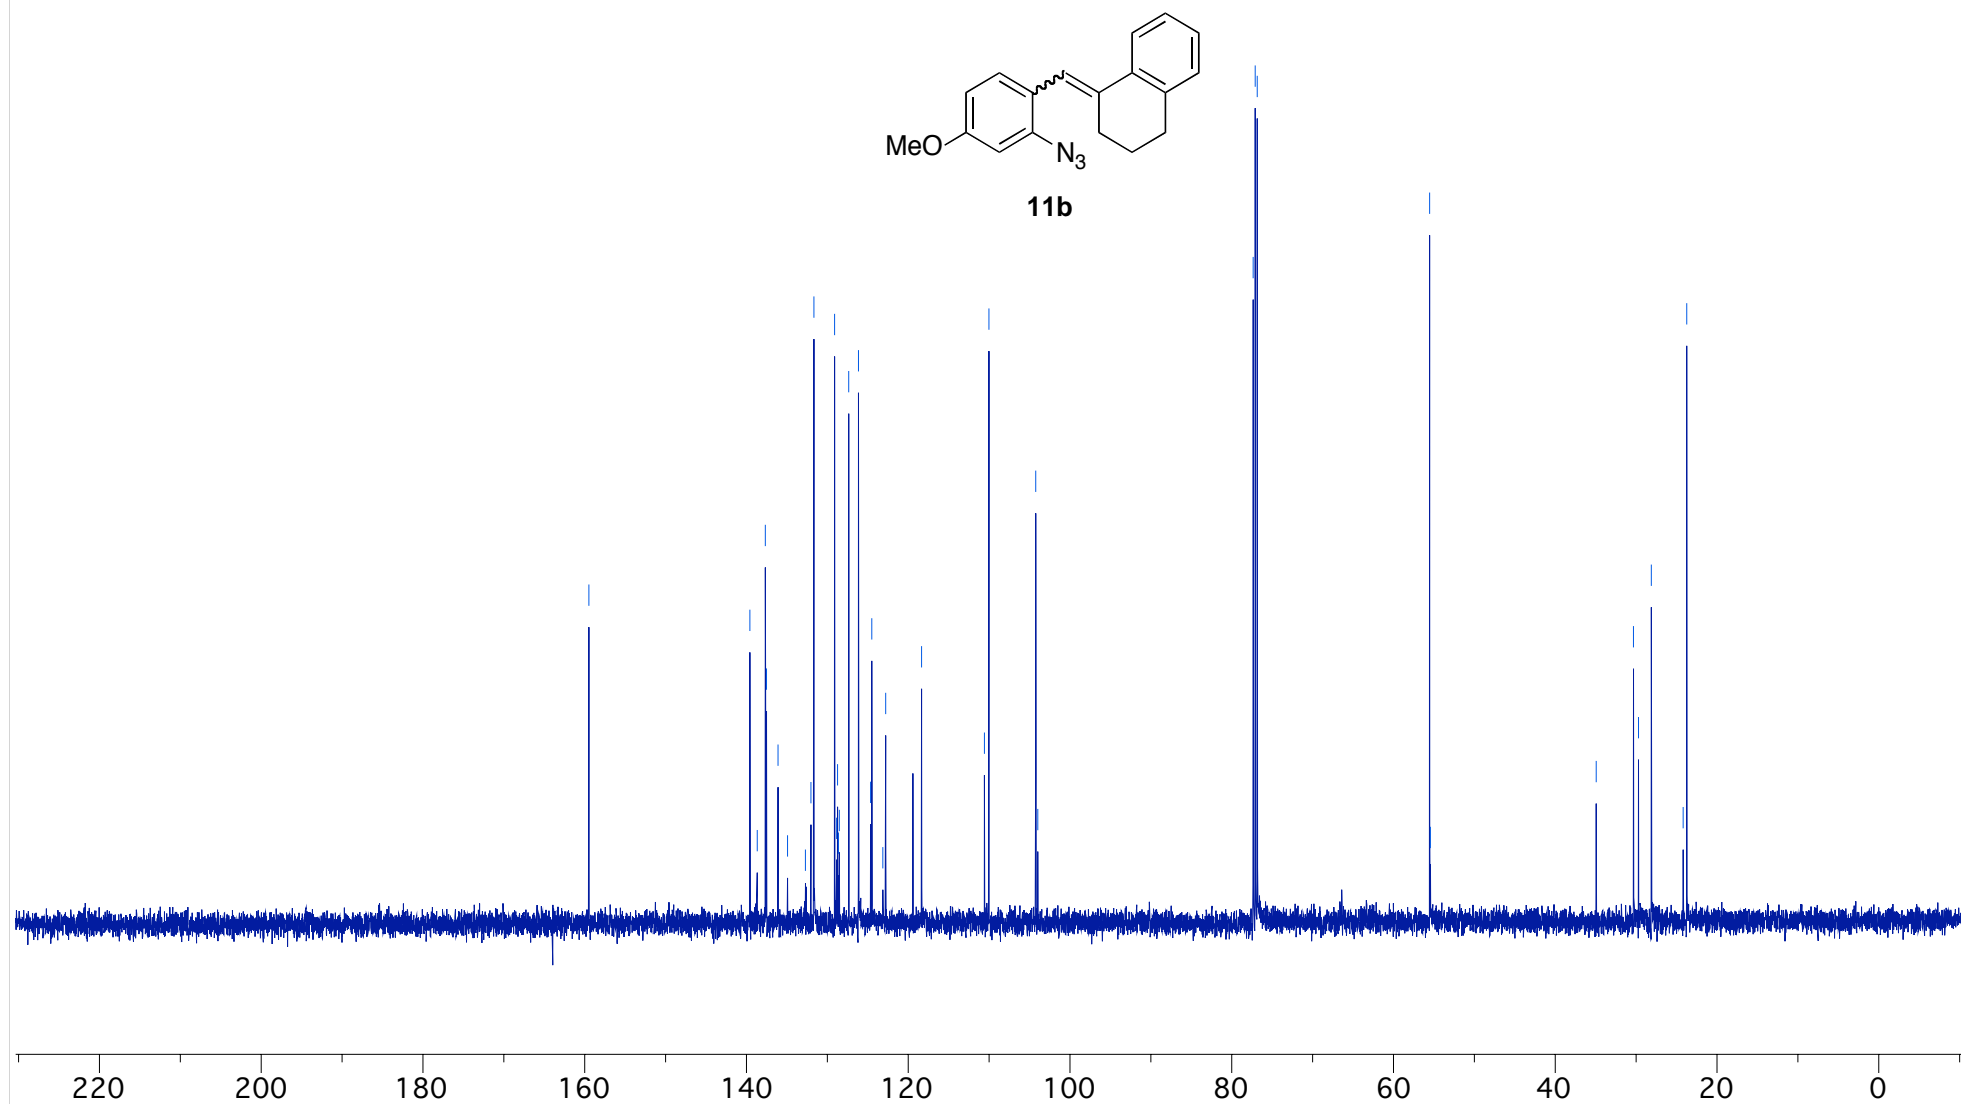



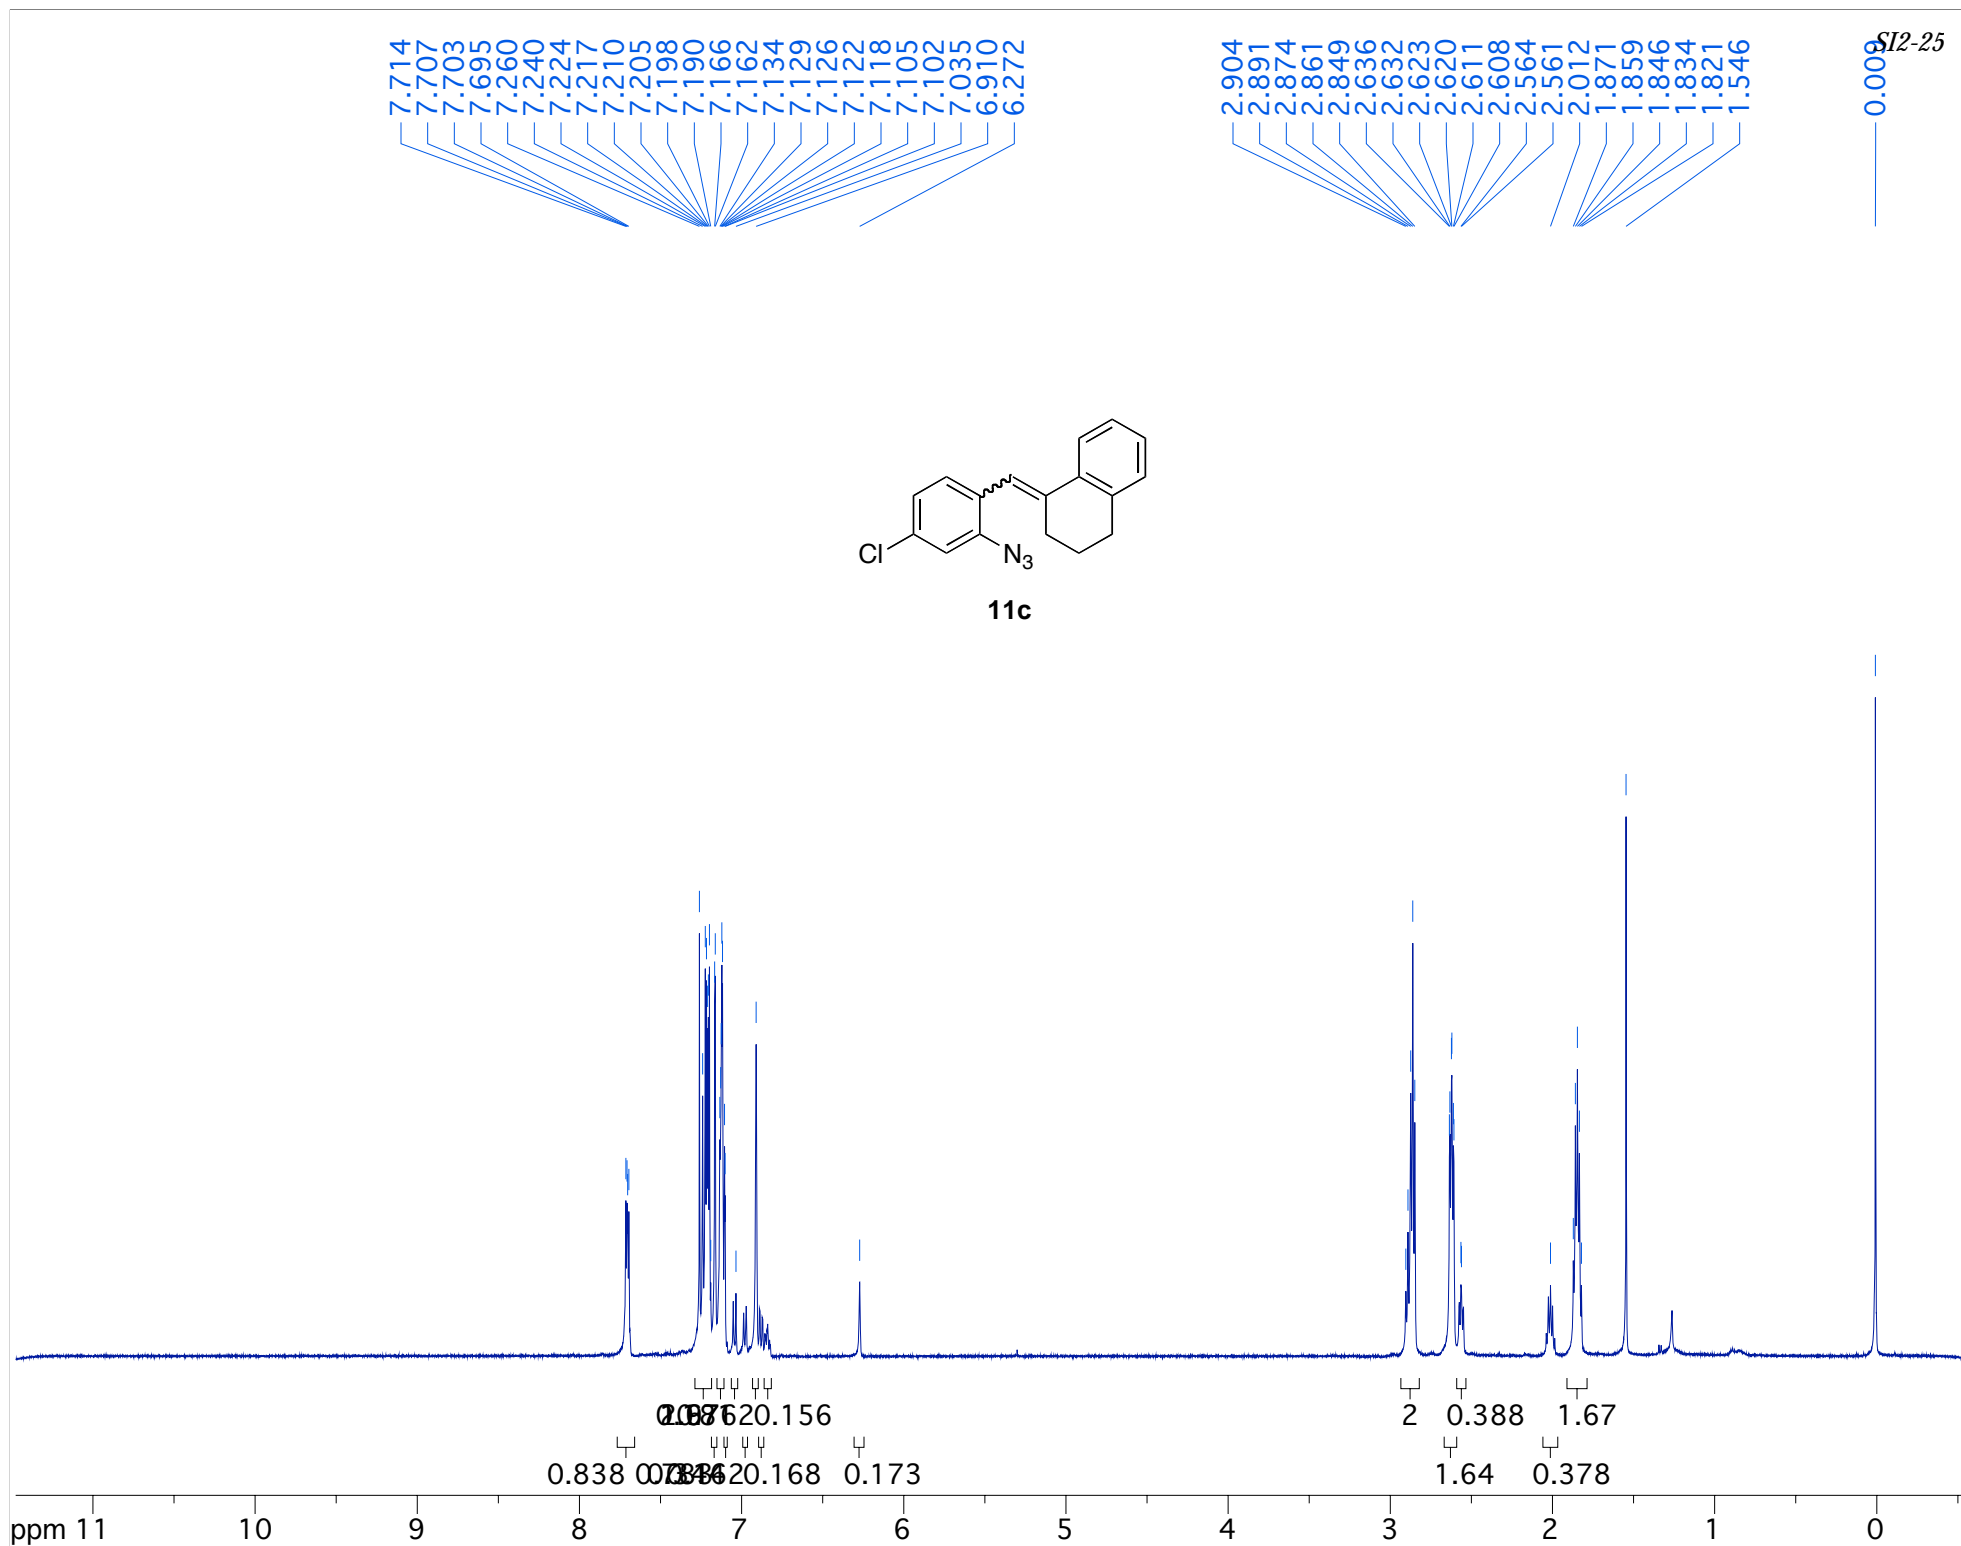

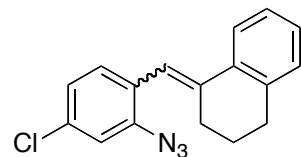

11c

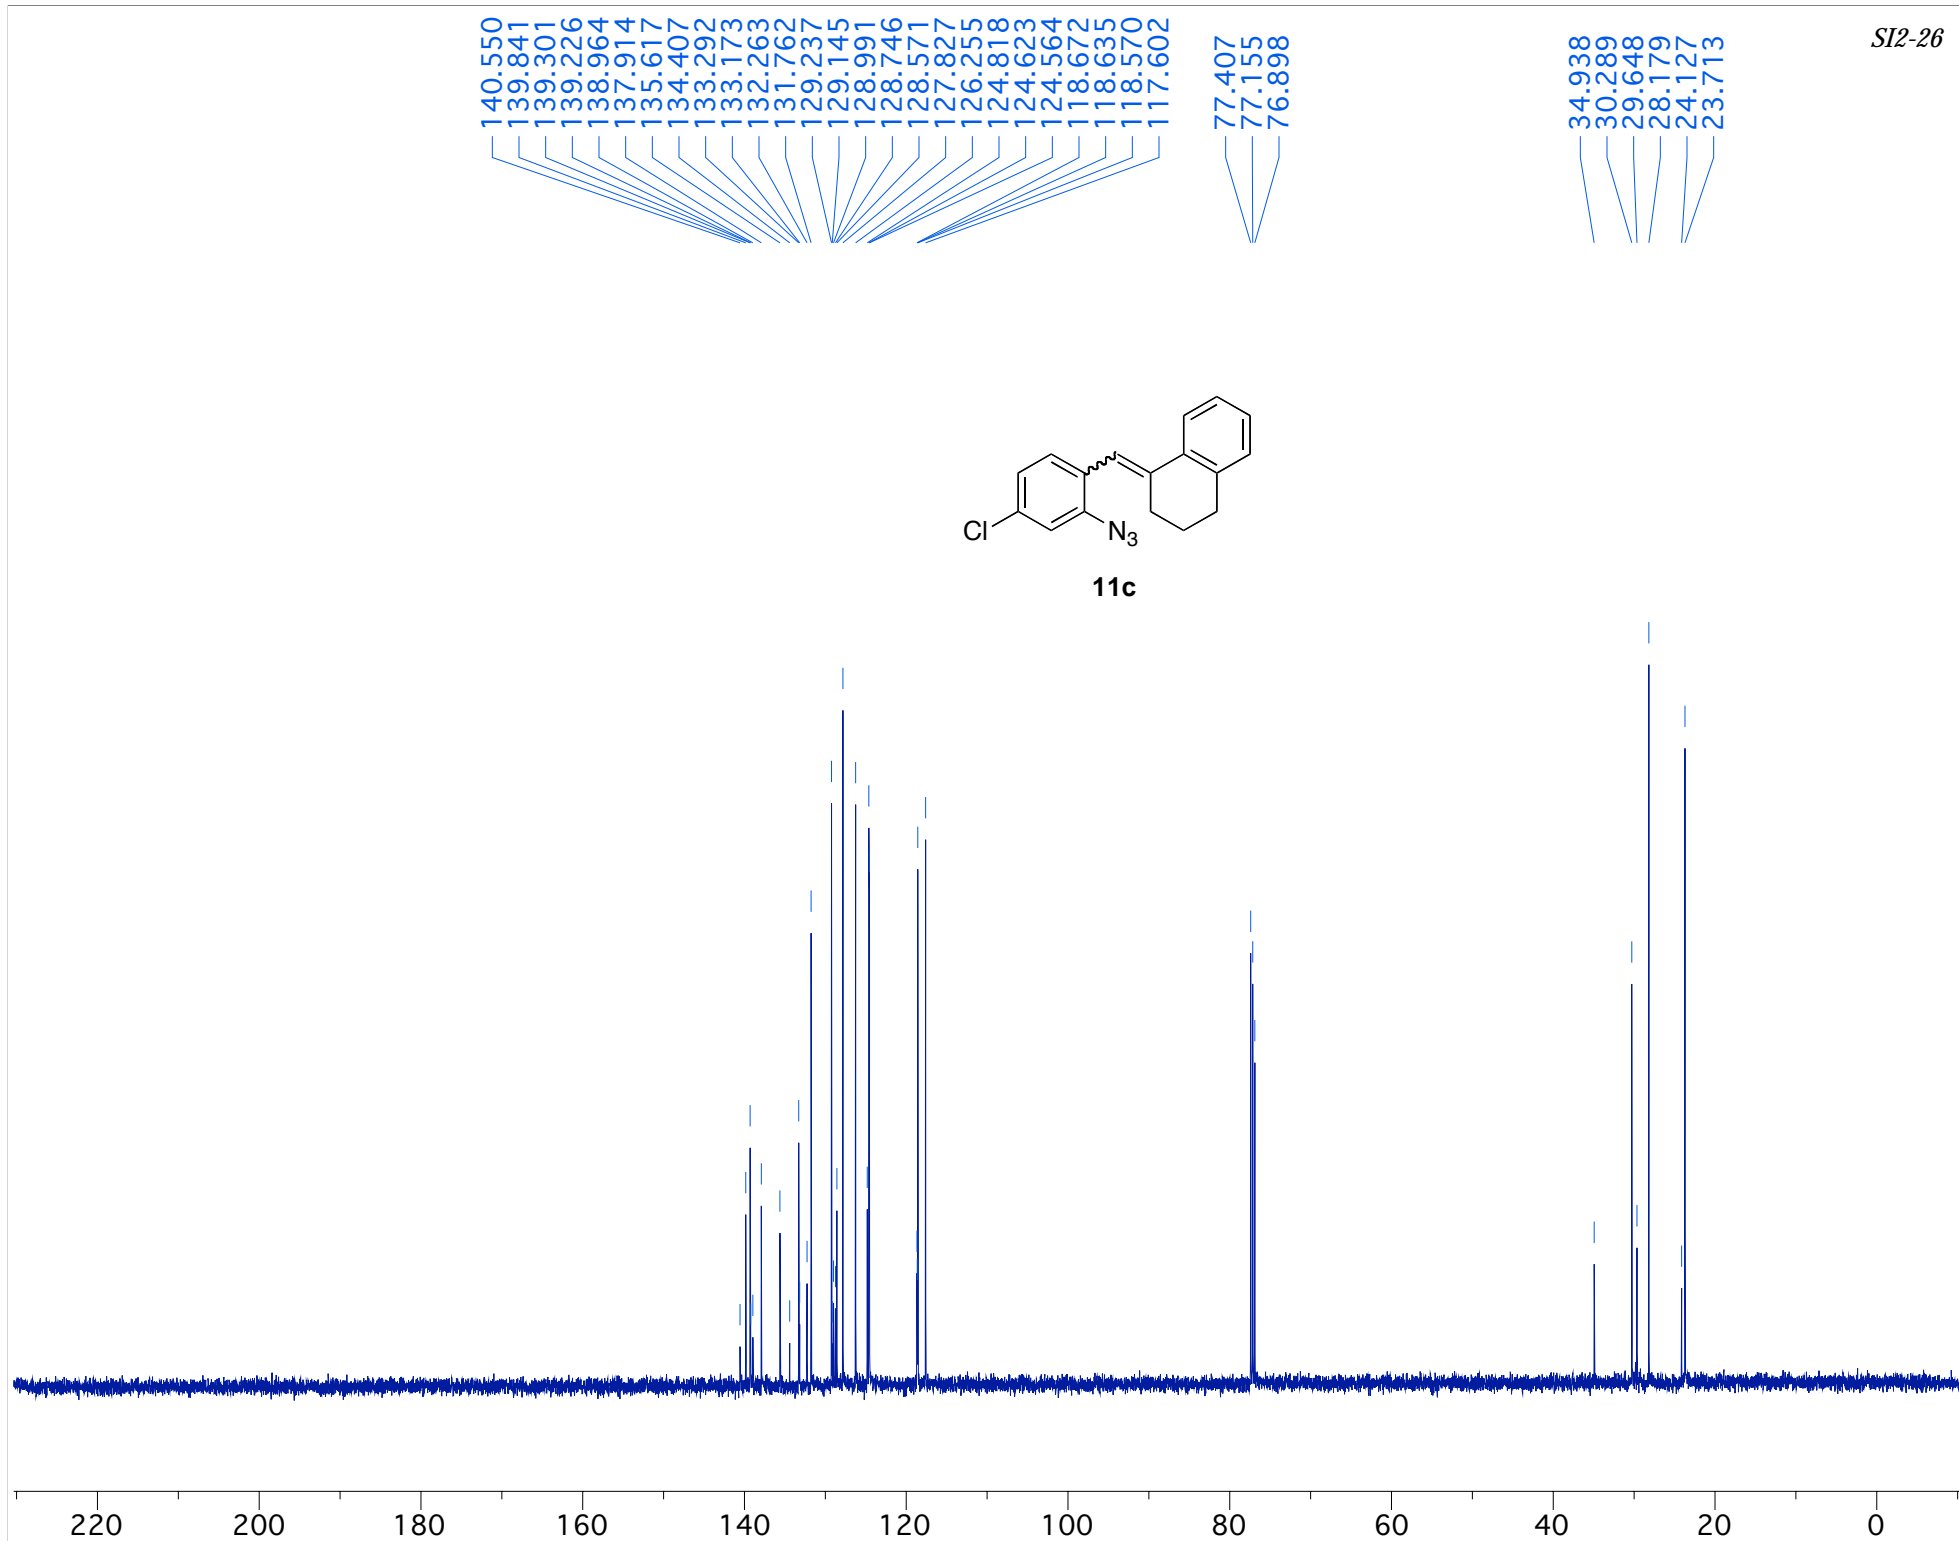

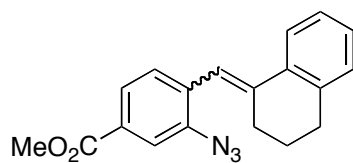

11d

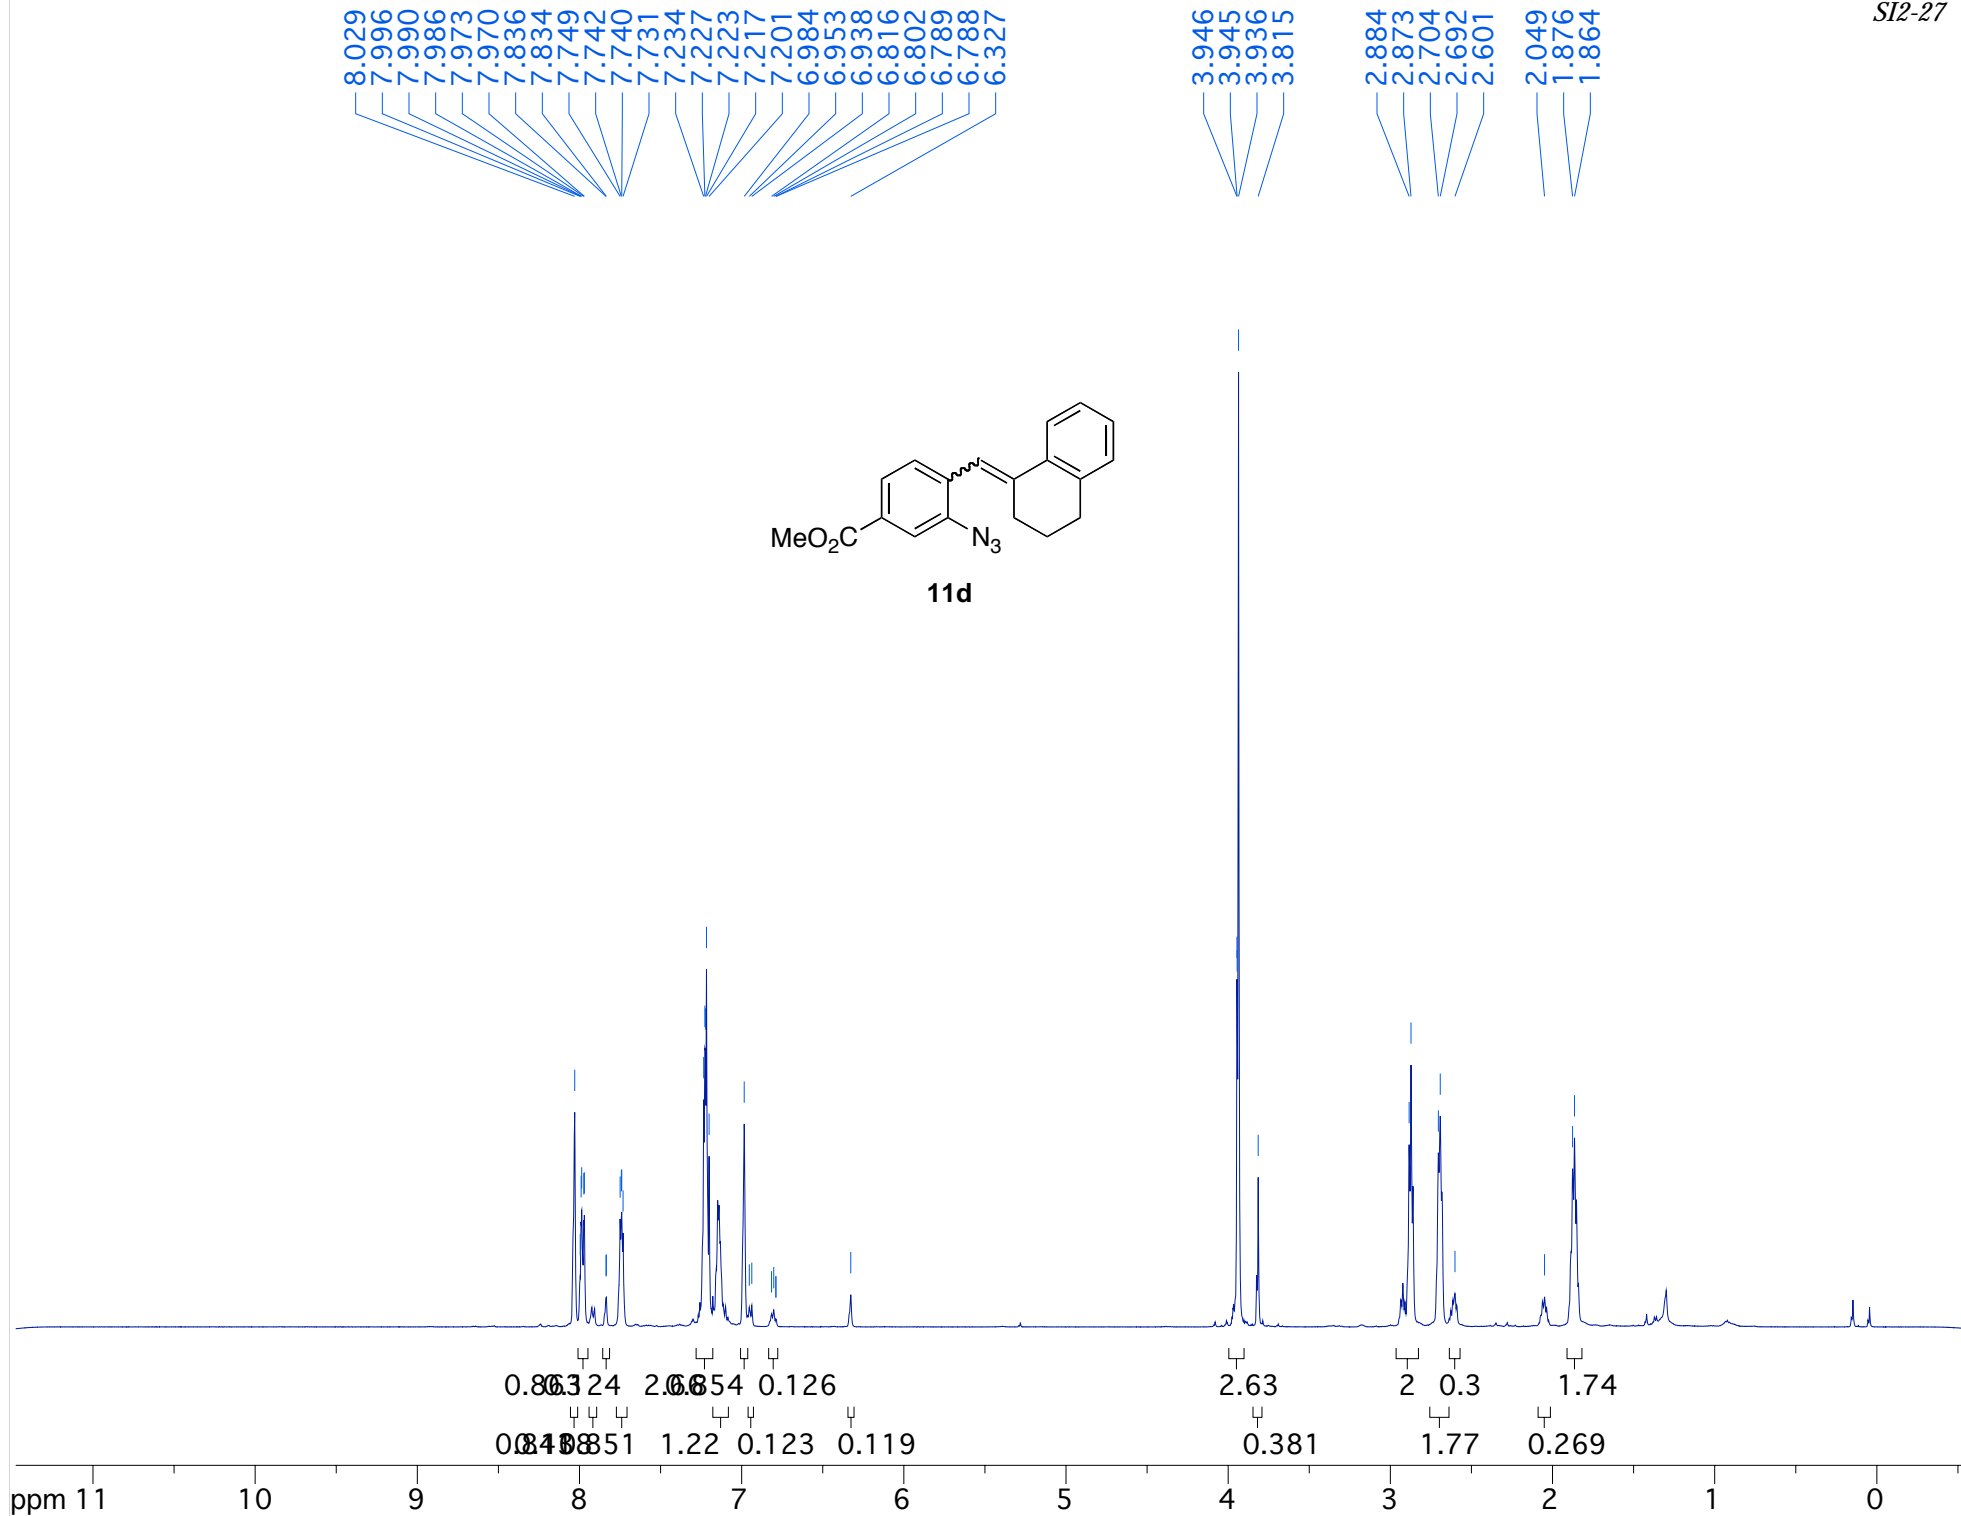

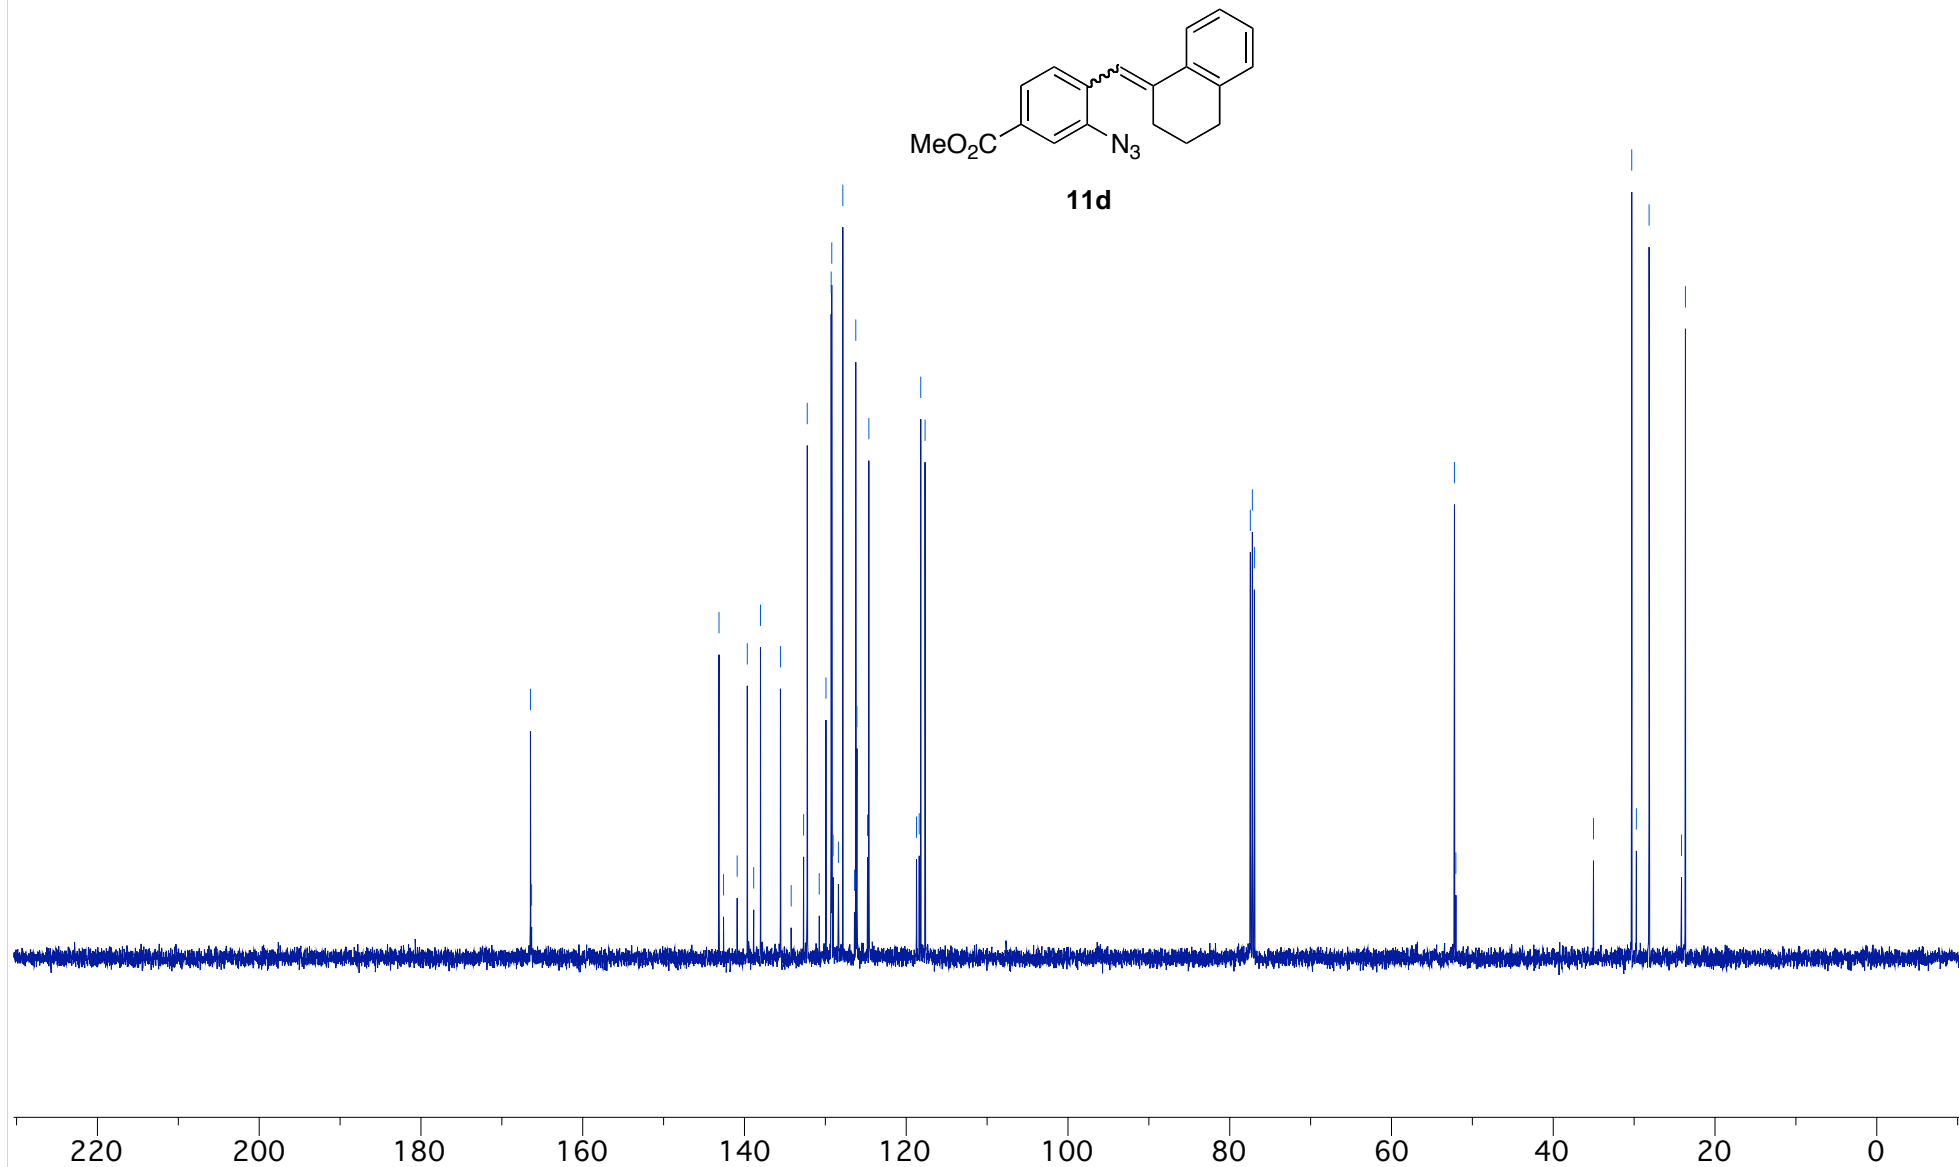

7.772  
7.762  
7.754  
7.458  
7.442  
7.431  
7.422  
7.403  
7.276  
7.266  
7.261  
7.260  
7.257  
7.256  
7.252  
7.248  
7.238  
7.180  
7.171  
7.167  
7.164  
7.163  
7.156  
7.141  
7.016  
6.994  
6.978  
6.891  
6.886  
6.878  
6.874  
6.862  
6.858  
6.370  
2.954  
2.941  
2.928  
2.919  
2.907  
2.894  
2.694  
2.691  
2.682  
2.679  
2.669  
2.666  
2.643  
2.641  
2.631  
2.628  
2.618  
2.615  
2.094  
2.081  
2.068  
2.055  
2.042  
1.918  
1.905  
1.892  
1.880  
1.867

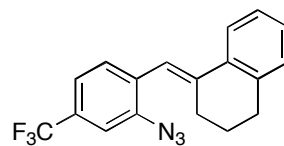

11e

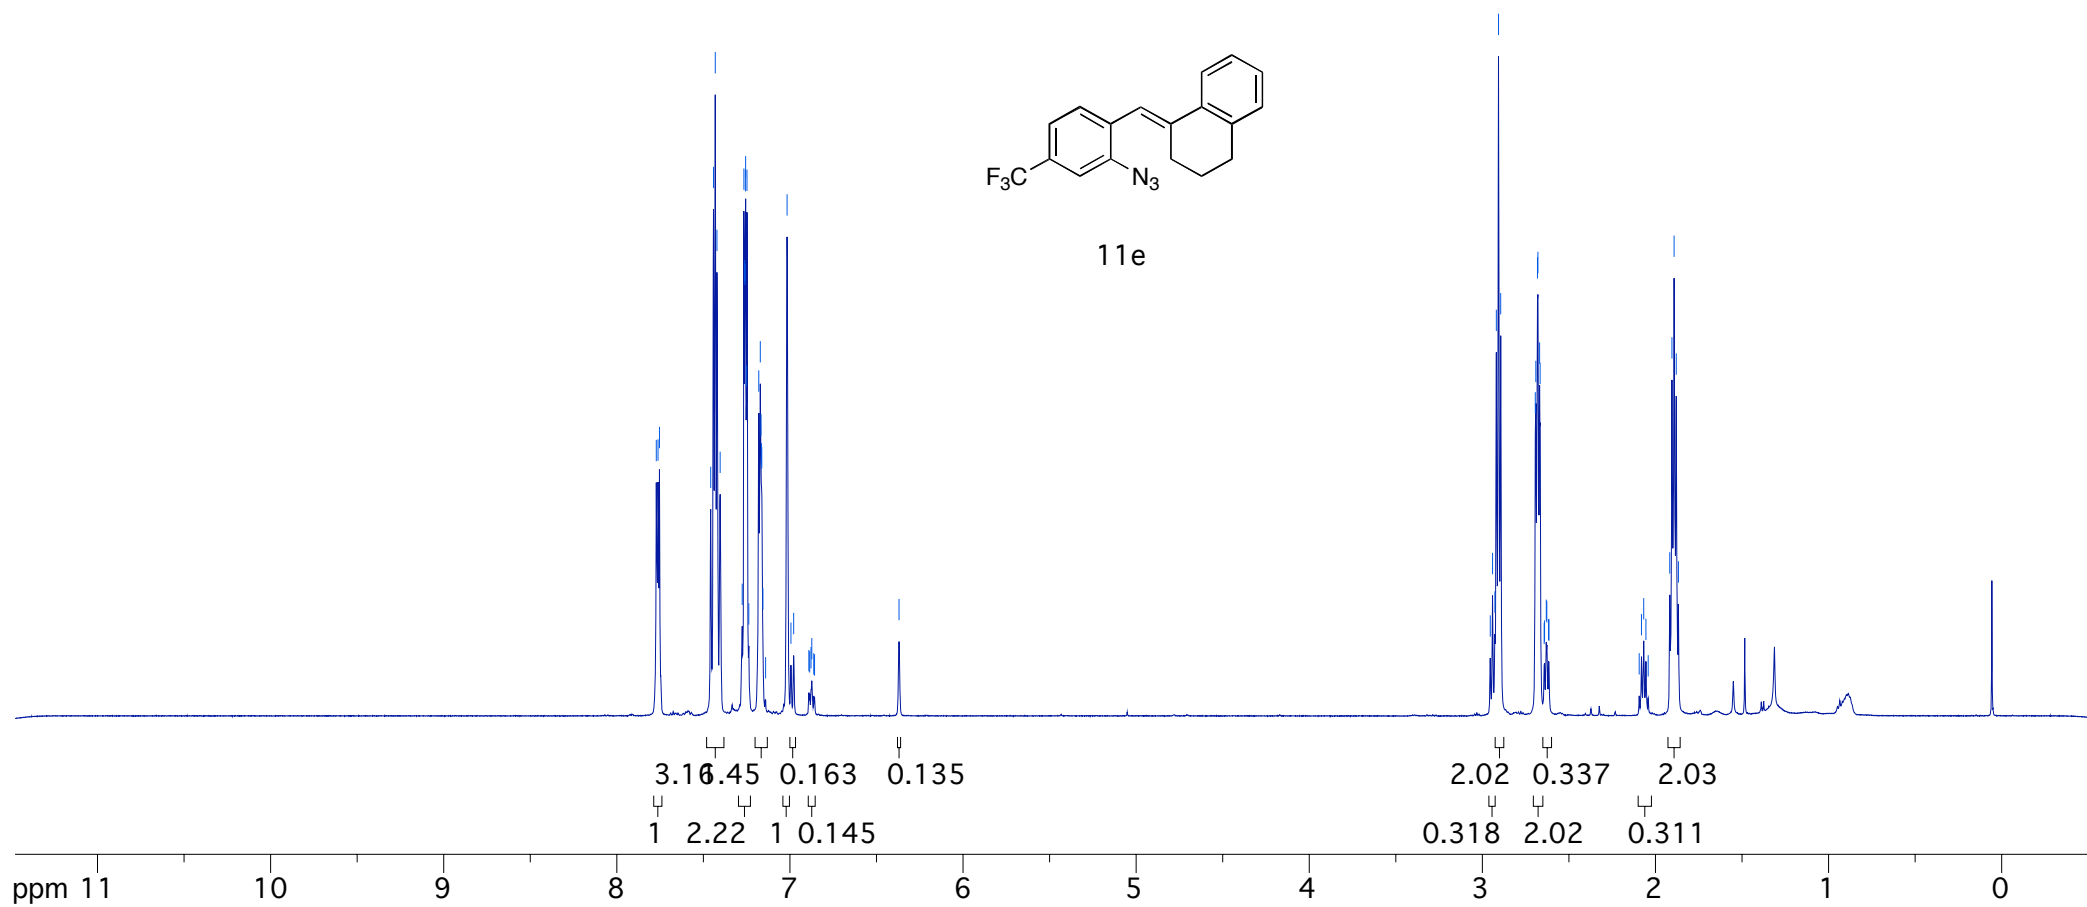

141.855  
140.518  
139.401  
139.109  
138.771  
138.080  
135.347  
134.294  
134.128  
133.599  
131.779  
131.293  
130.471  
130.217  
129.956  
129.692  
129.291  
129.032  
128.751  
128.090  
127.004  
126.283  
124.888  
124.835  
124.682  
122.669  
121.009  
120.982  
120.509  
118.484  
117.427  
115.501  
115.474  
115.323  
115.295  
77.348  
77.096  
76.838

34.923  
30.220  
29.569  
28.207  
24.049  
23.683

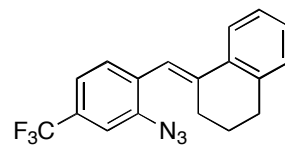

11e

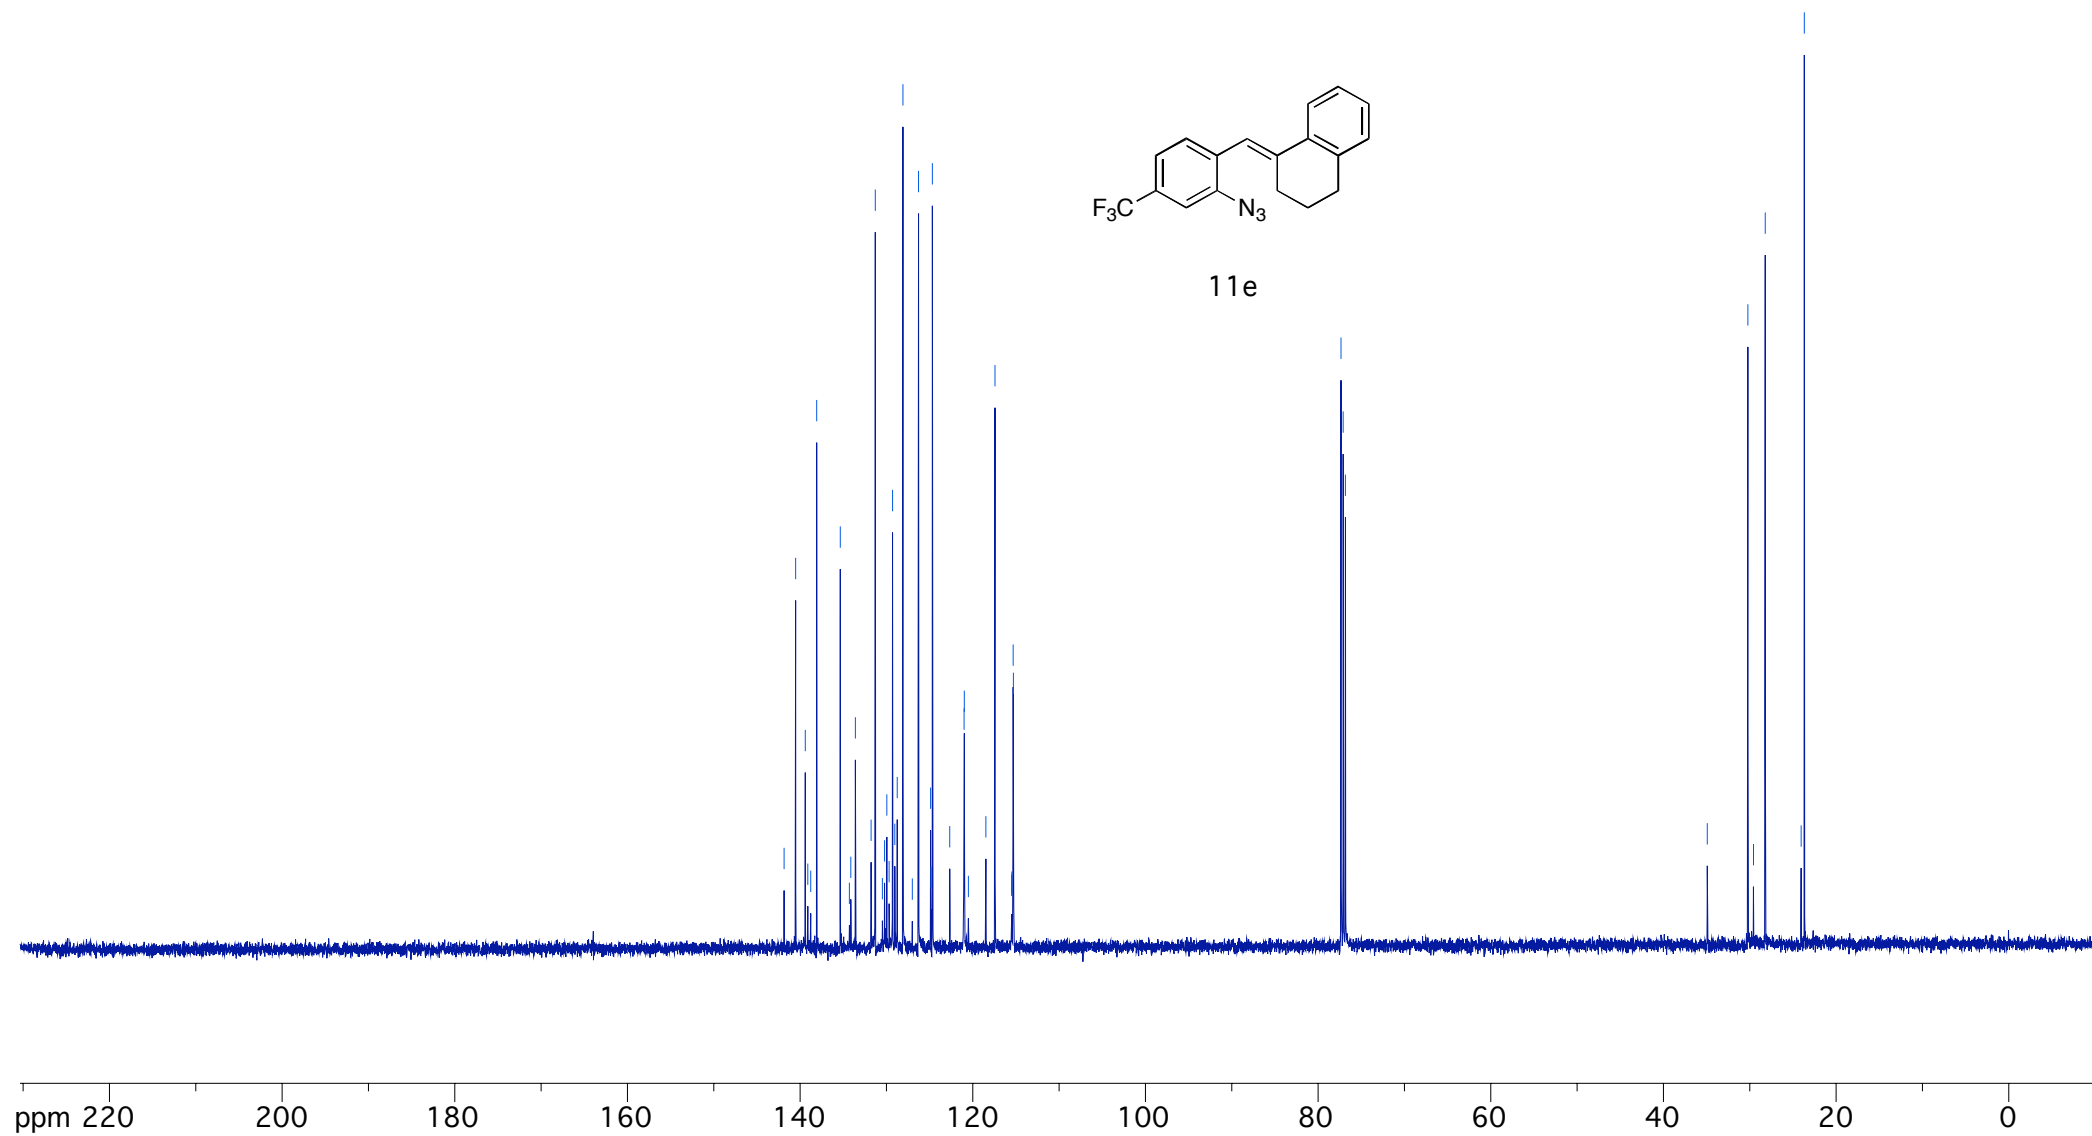

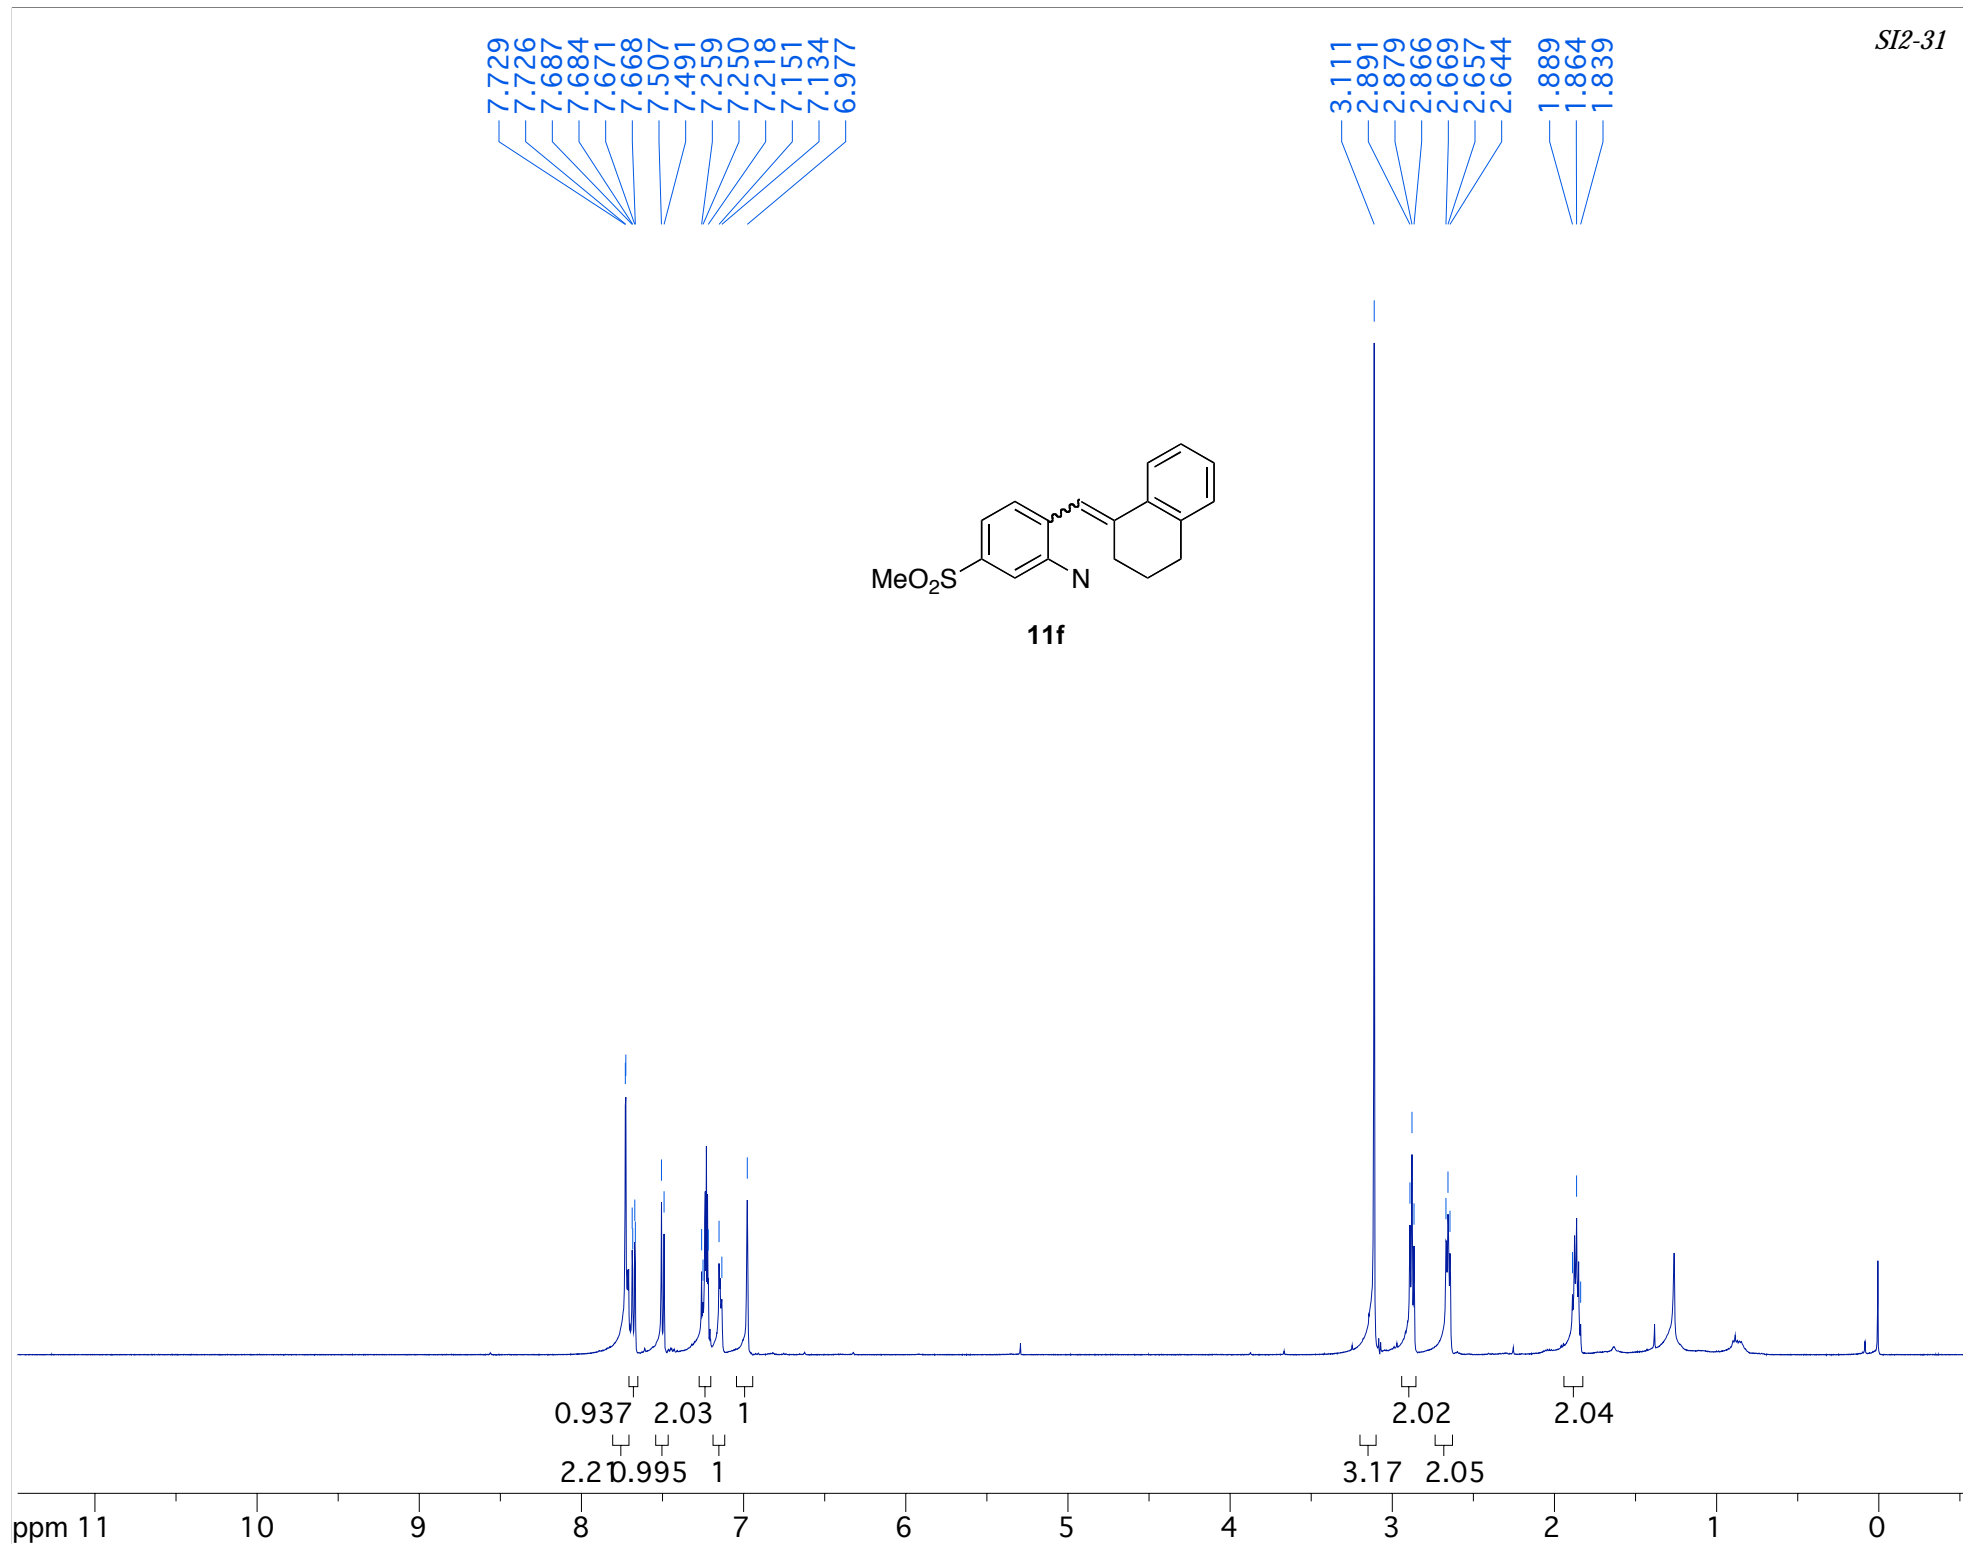

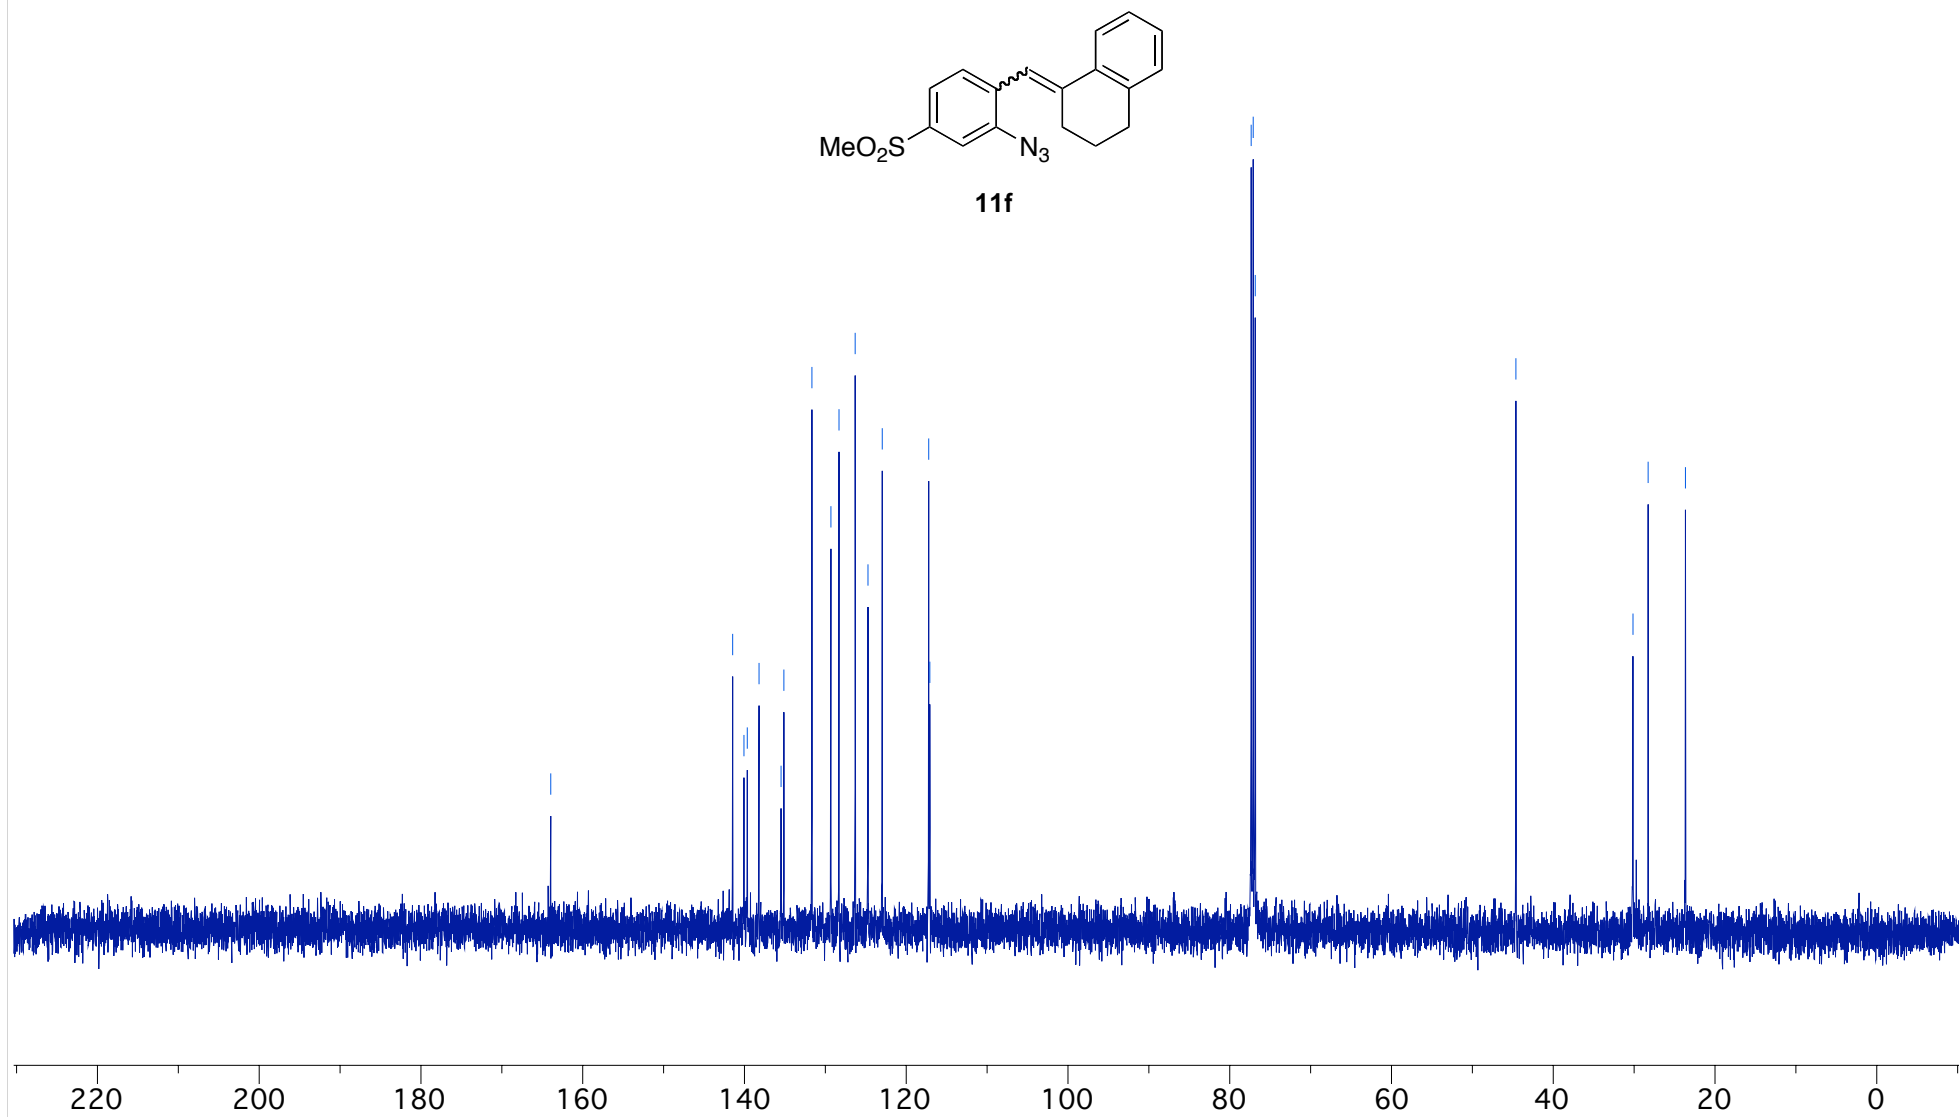



7.727  
7.717  
7.715  
7.708  
7.454  
7.449  
7.423  
7.418  
7.406  
7.401  
7.352  
7.348  
7.335  
7.331  
7.275  
7.271  
7.260  
7.248  
7.247  
7.240  
7.230  
7.222  
7.213  
7.165  
7.163  
7.156  
7.150  
7.139  
7.060  
7.043  
7.019  
7.003  
6.924  
6.898  
6.888  
6.881  
6.865  
6.281  
2.934  
2.921  
2.907  
2.893  
2.880  
2.868  
2.677  
2.675  
2.665  
2.662  
2.653  
2.650  
2.598  
2.588  
2.575  
2.573  
2.062  
2.037  
2.011  
1.899  
1.886  
1.874  
1.861  
1.849

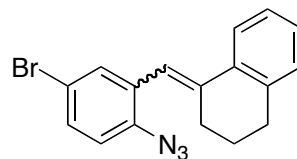

11g

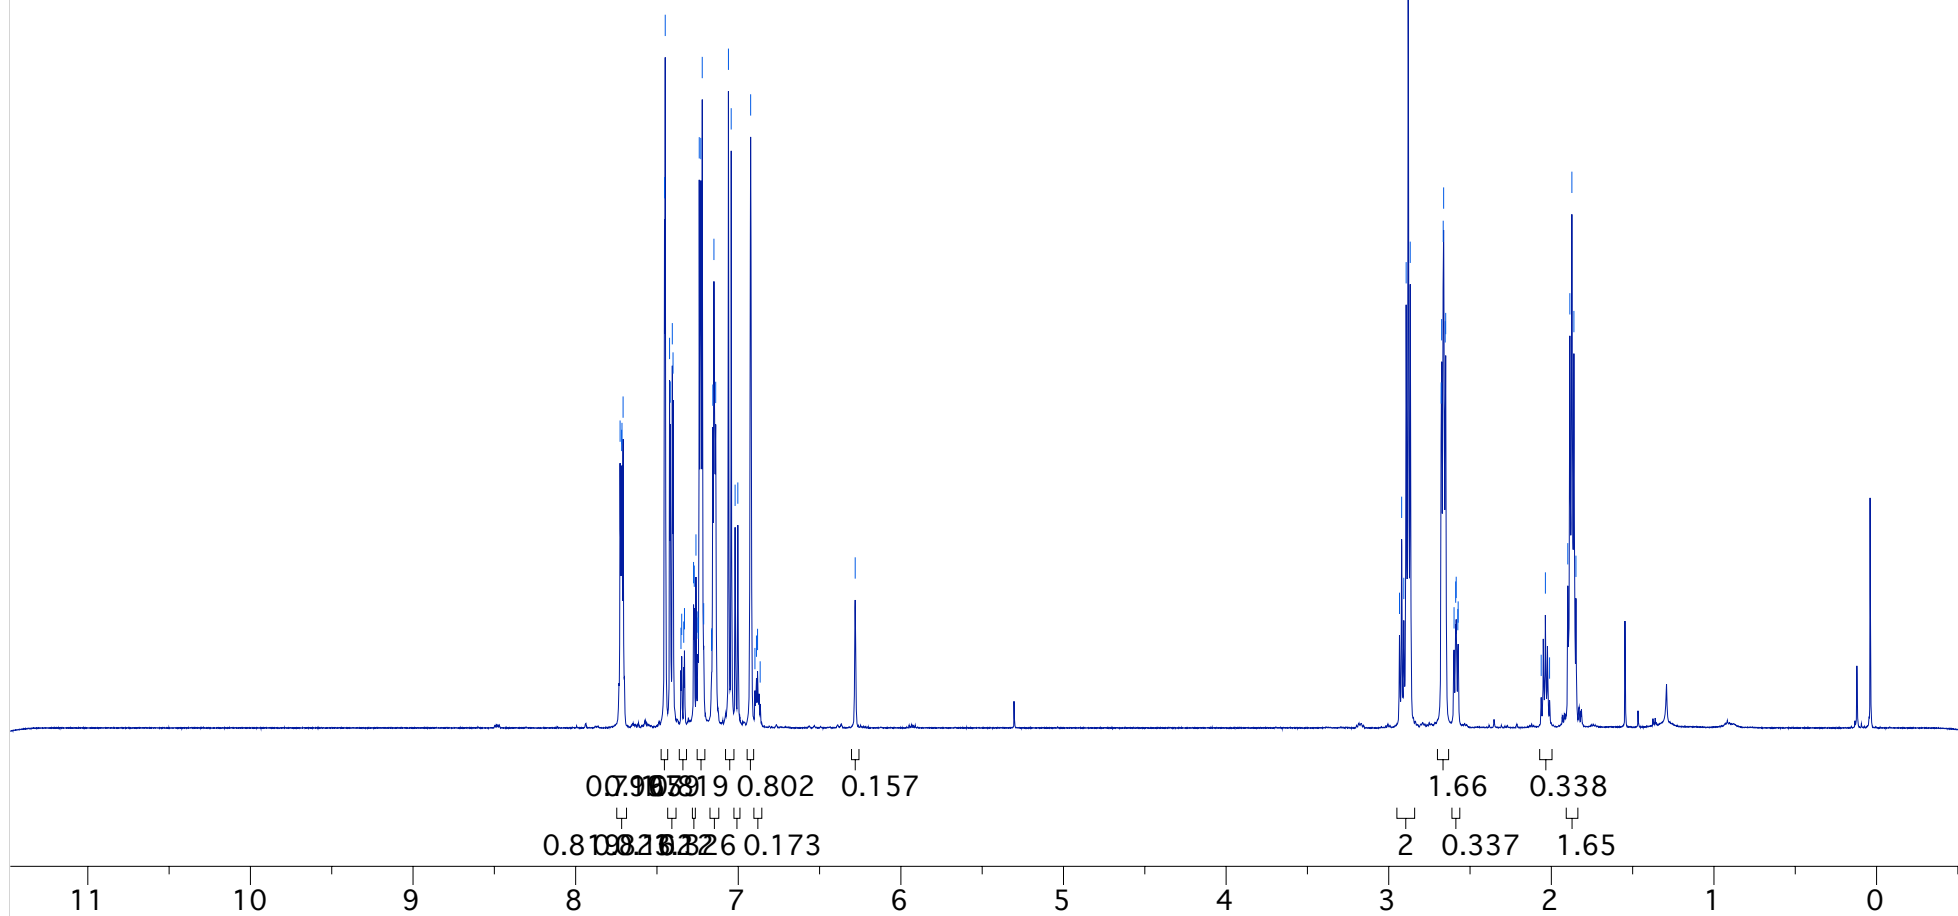

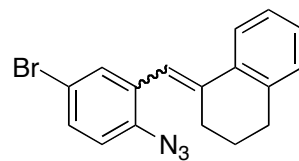

11g

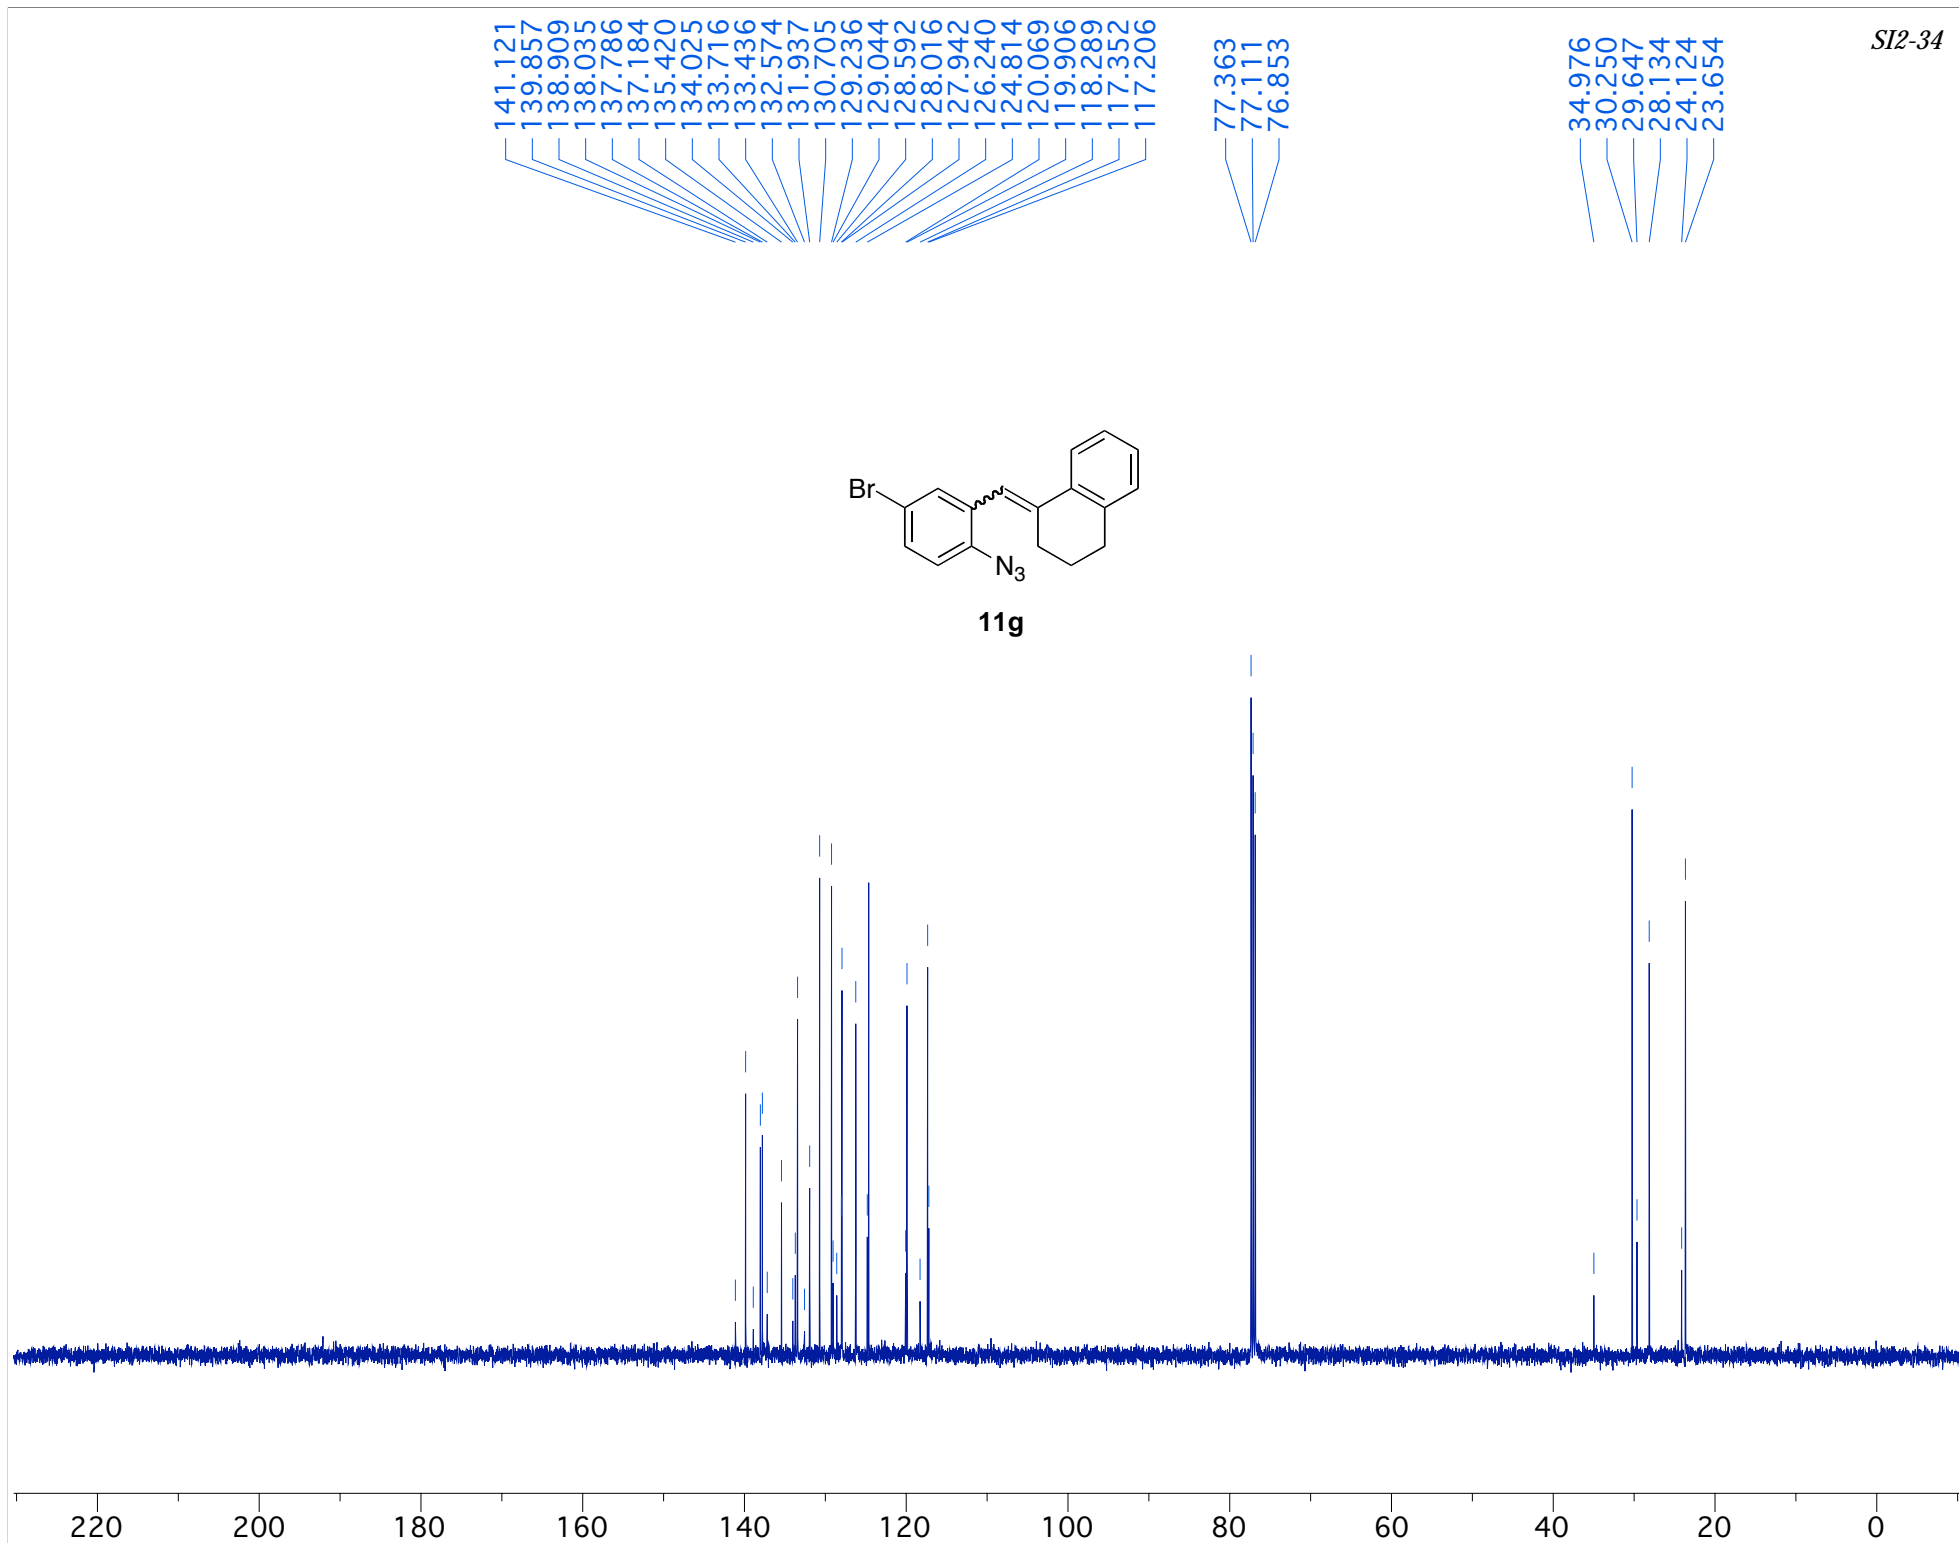

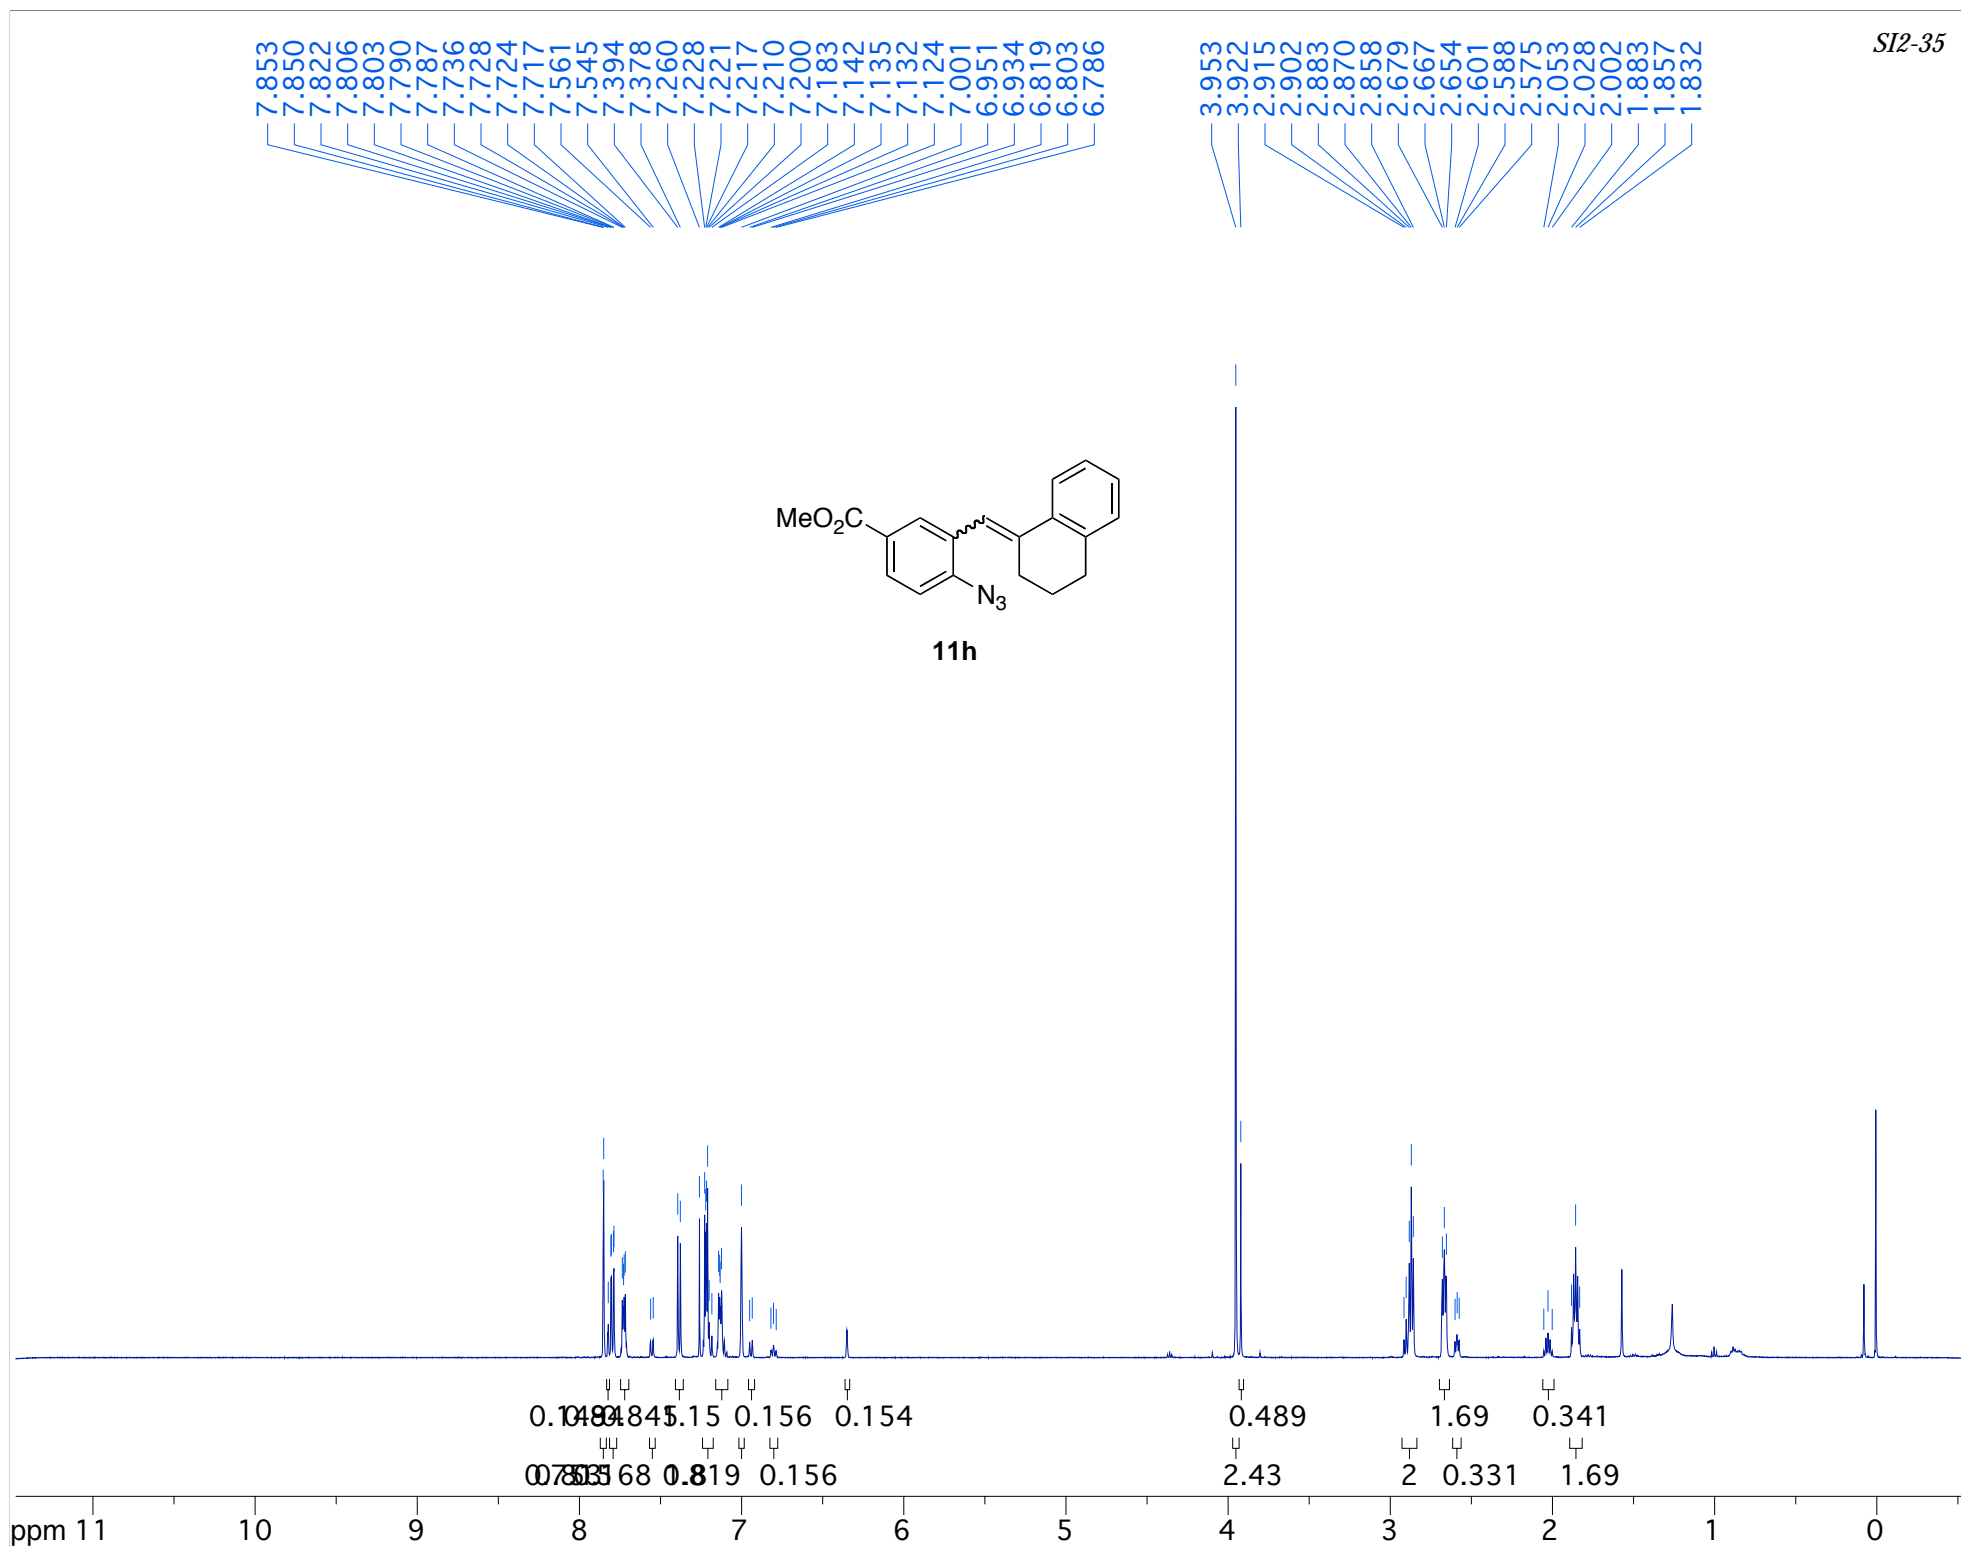

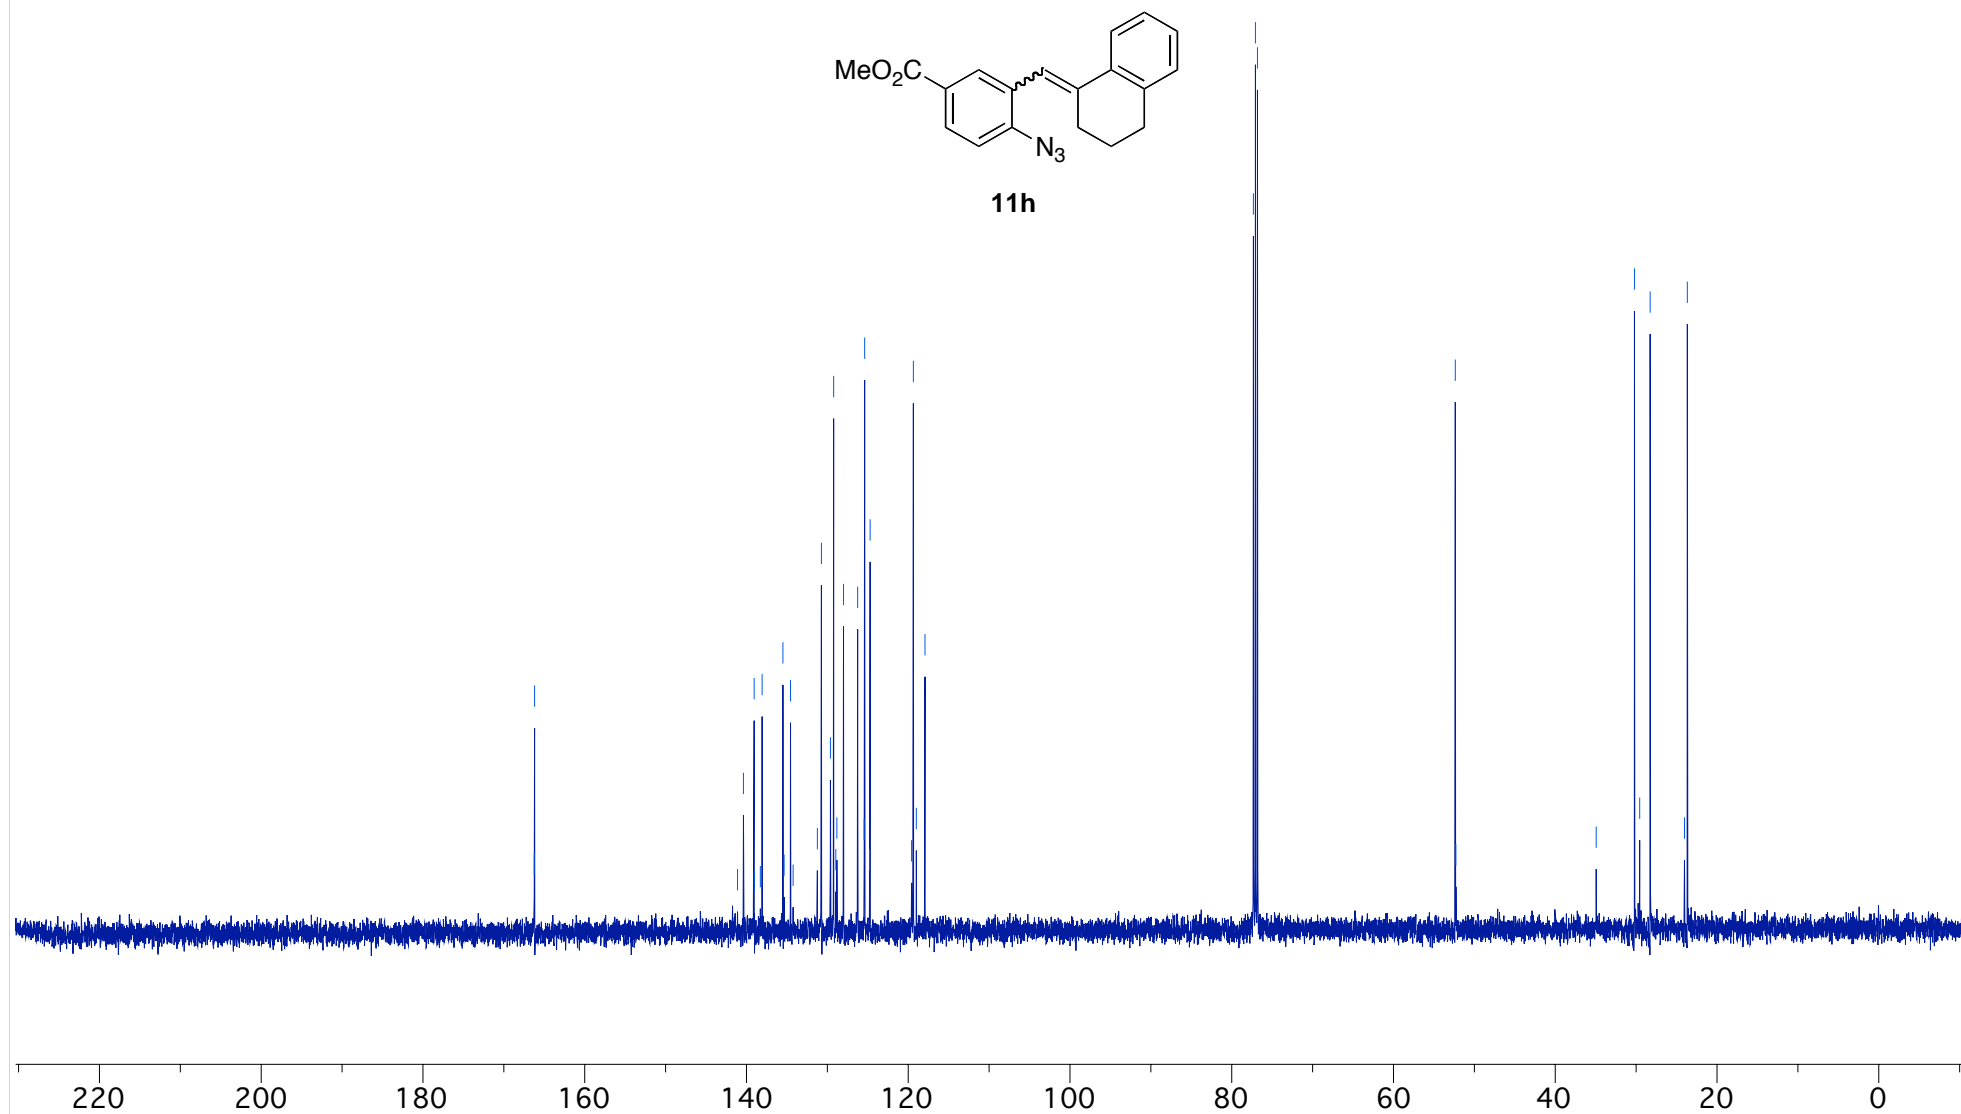

7.667  
7.662  
7.650  
7.551  
7.549  
7.536  
7.533  
7.434  
7.418  
7.351  
7.337  
7.335  
7.333  
7.322  
7.320  
7.319  
7.317  
7.305  
7.303  
7.301  
7.299  
7.297  
7.292  
7.292  
7.290  
7.288  
7.286  
7.277  
7.275  
7.271  
7.269  
7.260  
7.256  
7.254  
7.248  
7.242  
7.241  
7.237  
7.203  
7.201  
7.188  
7.187  
7.185  
7.173  
7.172  
7.171  
7.159  
7.158  
7.156  
7.109  
7.105  
7.100  
7.046  
7.030  
6.952  
6.949  
6.948  
6.947  
6.943  
6.939  
6.934  
6.933  
6.932  
6.931  
6.920  
6.919  
6.918  
6.916  
6.469  
5.500  
3.084  
3.078  
3.073  
3.072  
3.066  
3.062  
3.057  
3.045  
3.039  
3.034  
3.029  
3.024  
3.017  
3.011  
3.006  
2.964  
2.962

SI2-37

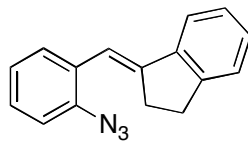

14a

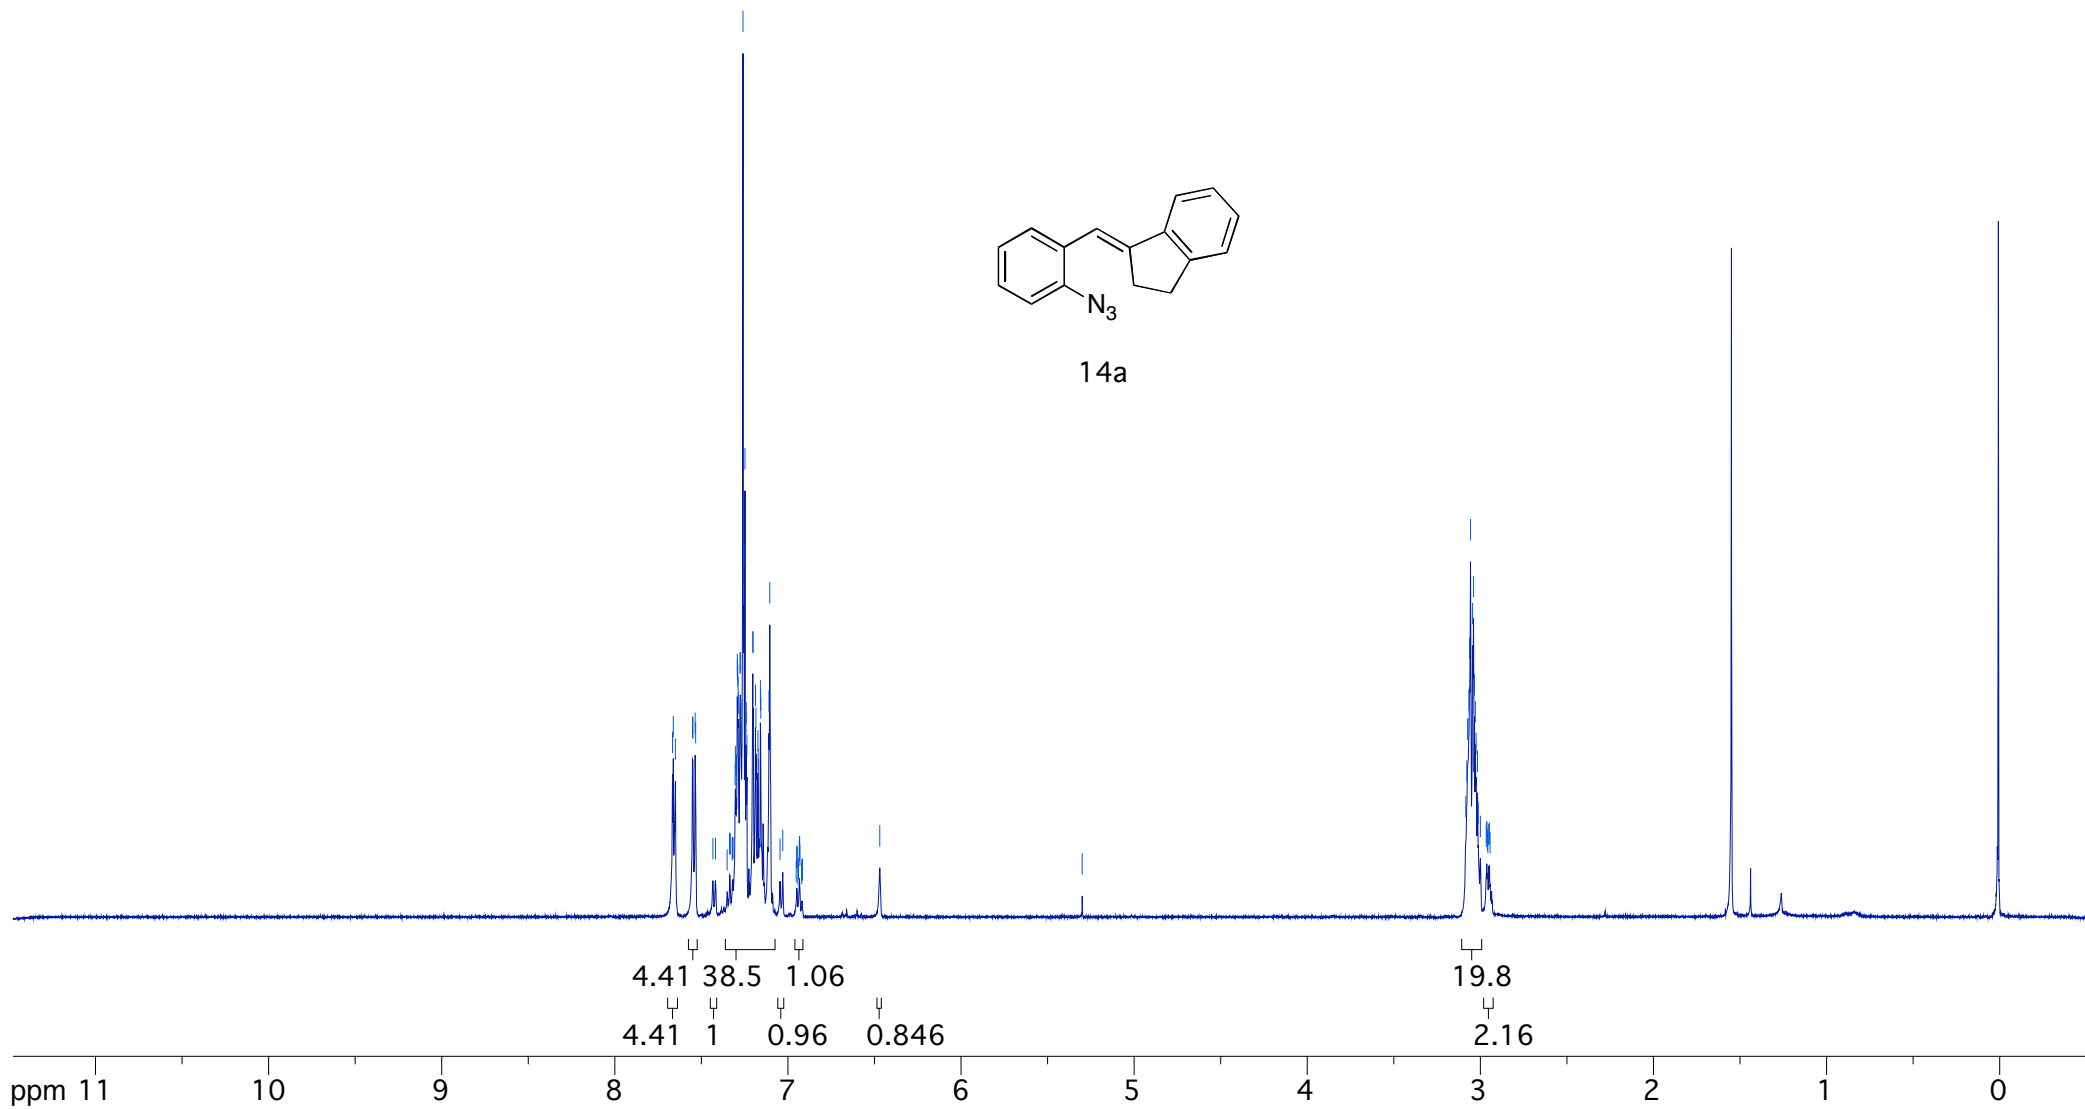

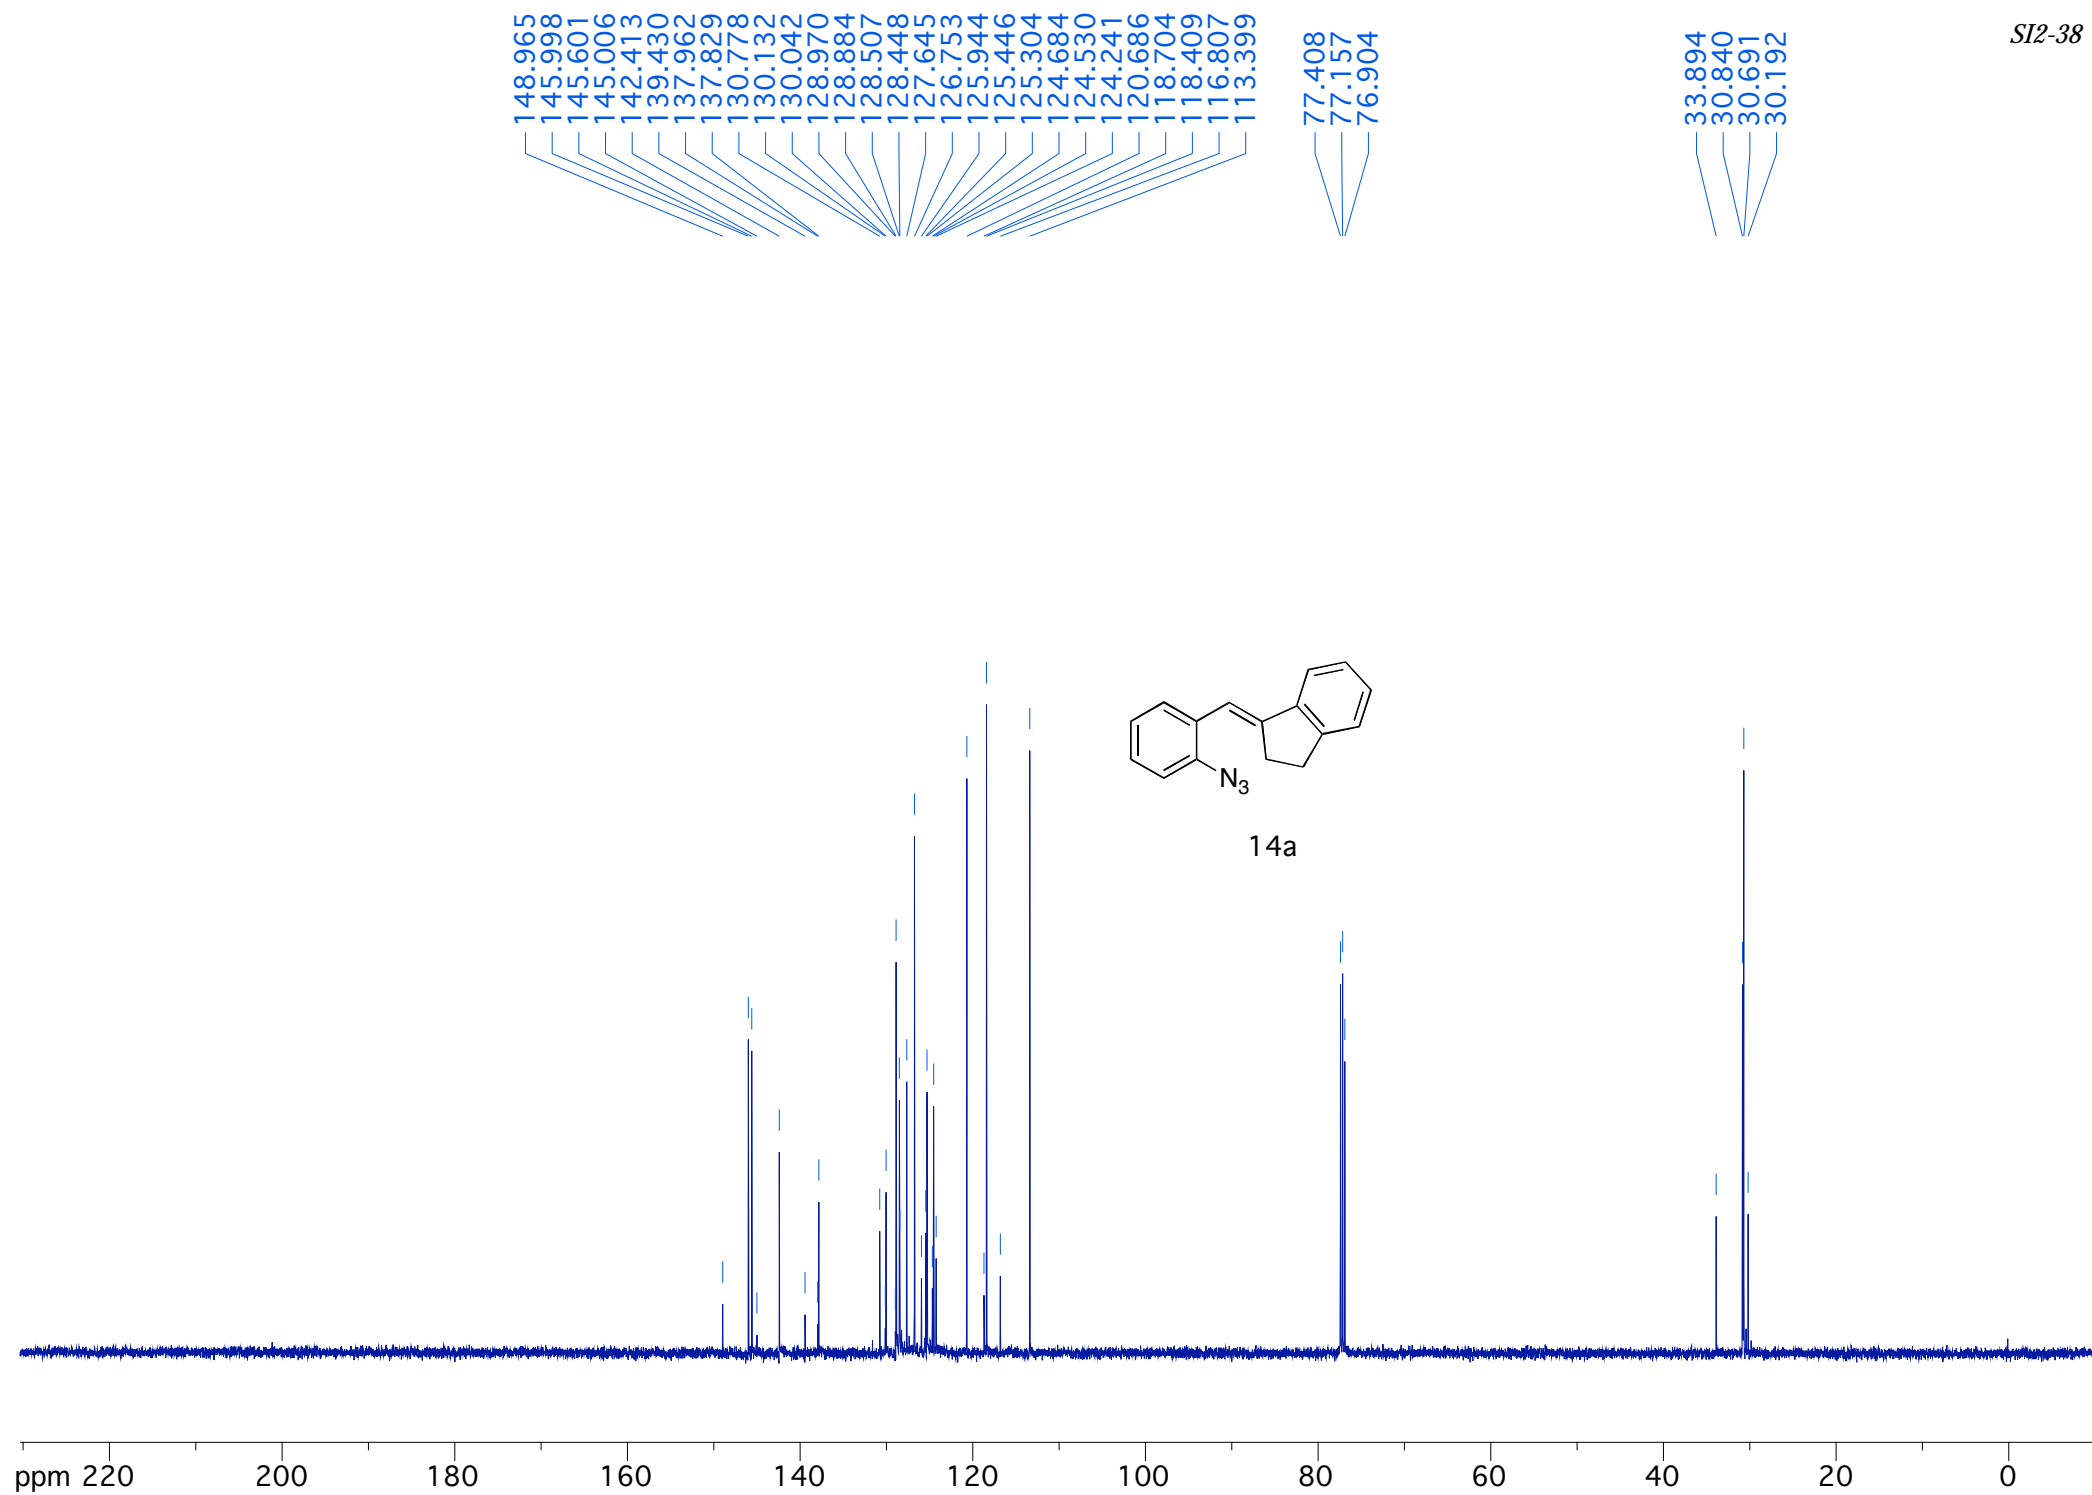

7.818  
7.803  
7.543  
7.527  
7.521  
7.505  
7.440  
7.425  
7.388  
7.373  
7.357  
7.356  
7.341  
7.340  
7.329  
7.326  
7.312  
7.298  
7.295  
7.260  
7.233  
7.214  
7.198  
7.184  
7.181  
7.175  
7.169  
7.167  
7.145  
7.144  
7.130  
7.129  
7.115  
7.114  
7.061  
7.046  
7.030  
6.572

3.242  
3.230  
3.215  
3.198  
3.183  
3.084  
3.079  
3.070  
3.066  
3.061  
3.057  
3.052  
3.025  
3.021  
3.015  
3.011  
3.007  
3.007  
2.997  
2.993

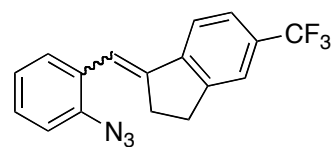

14b

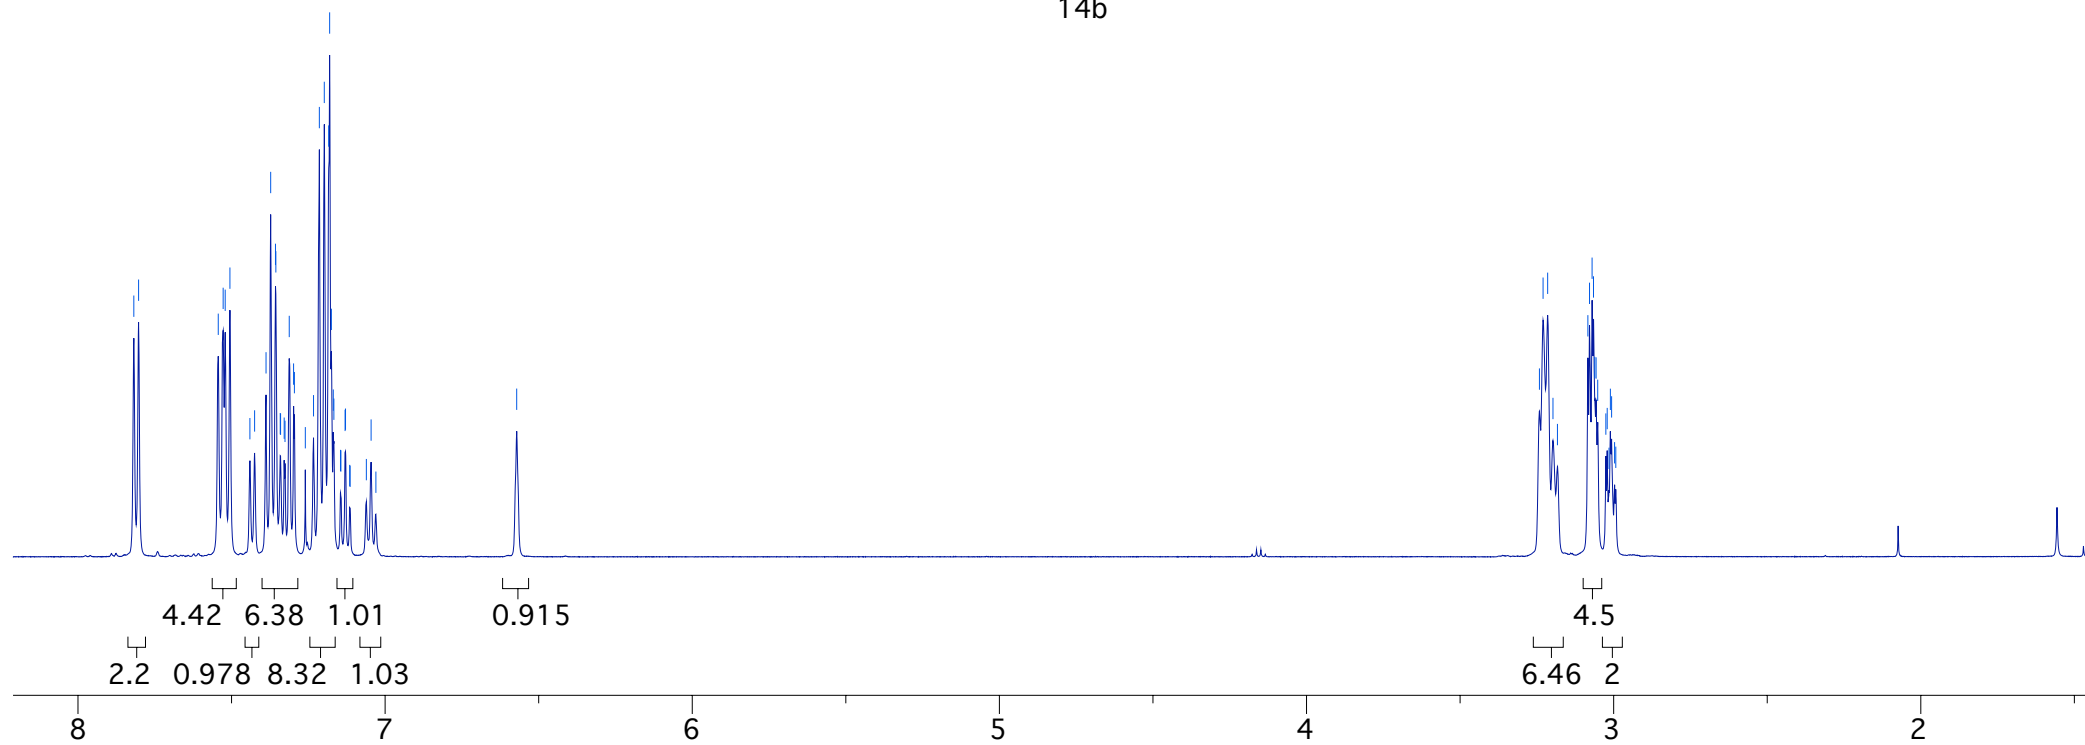

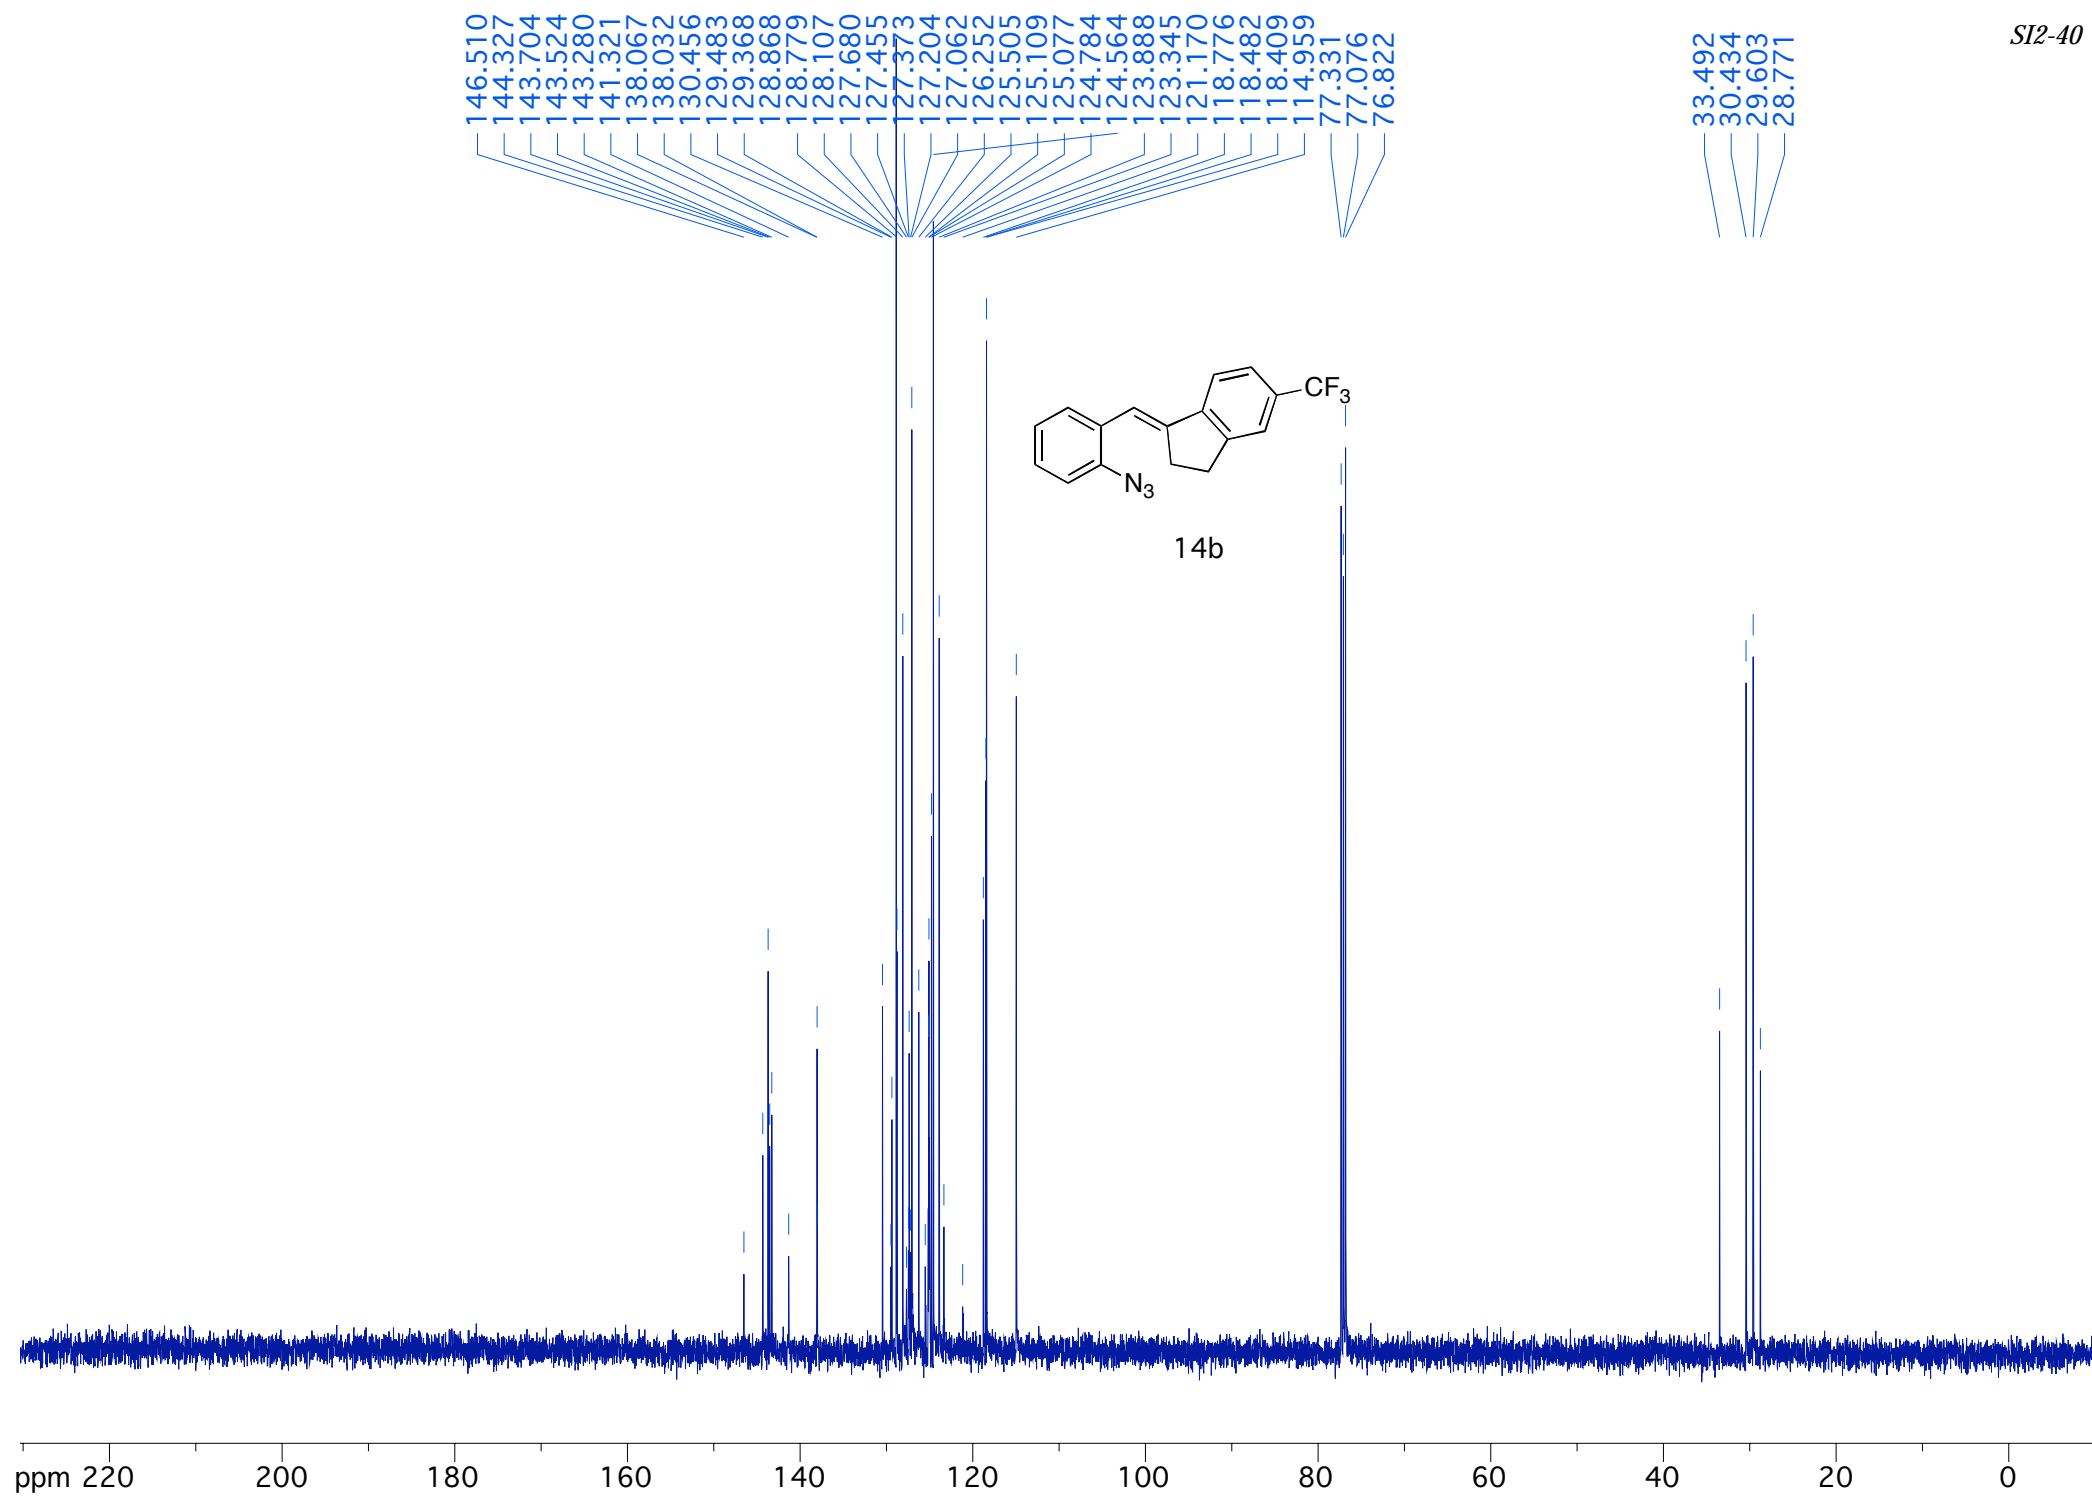



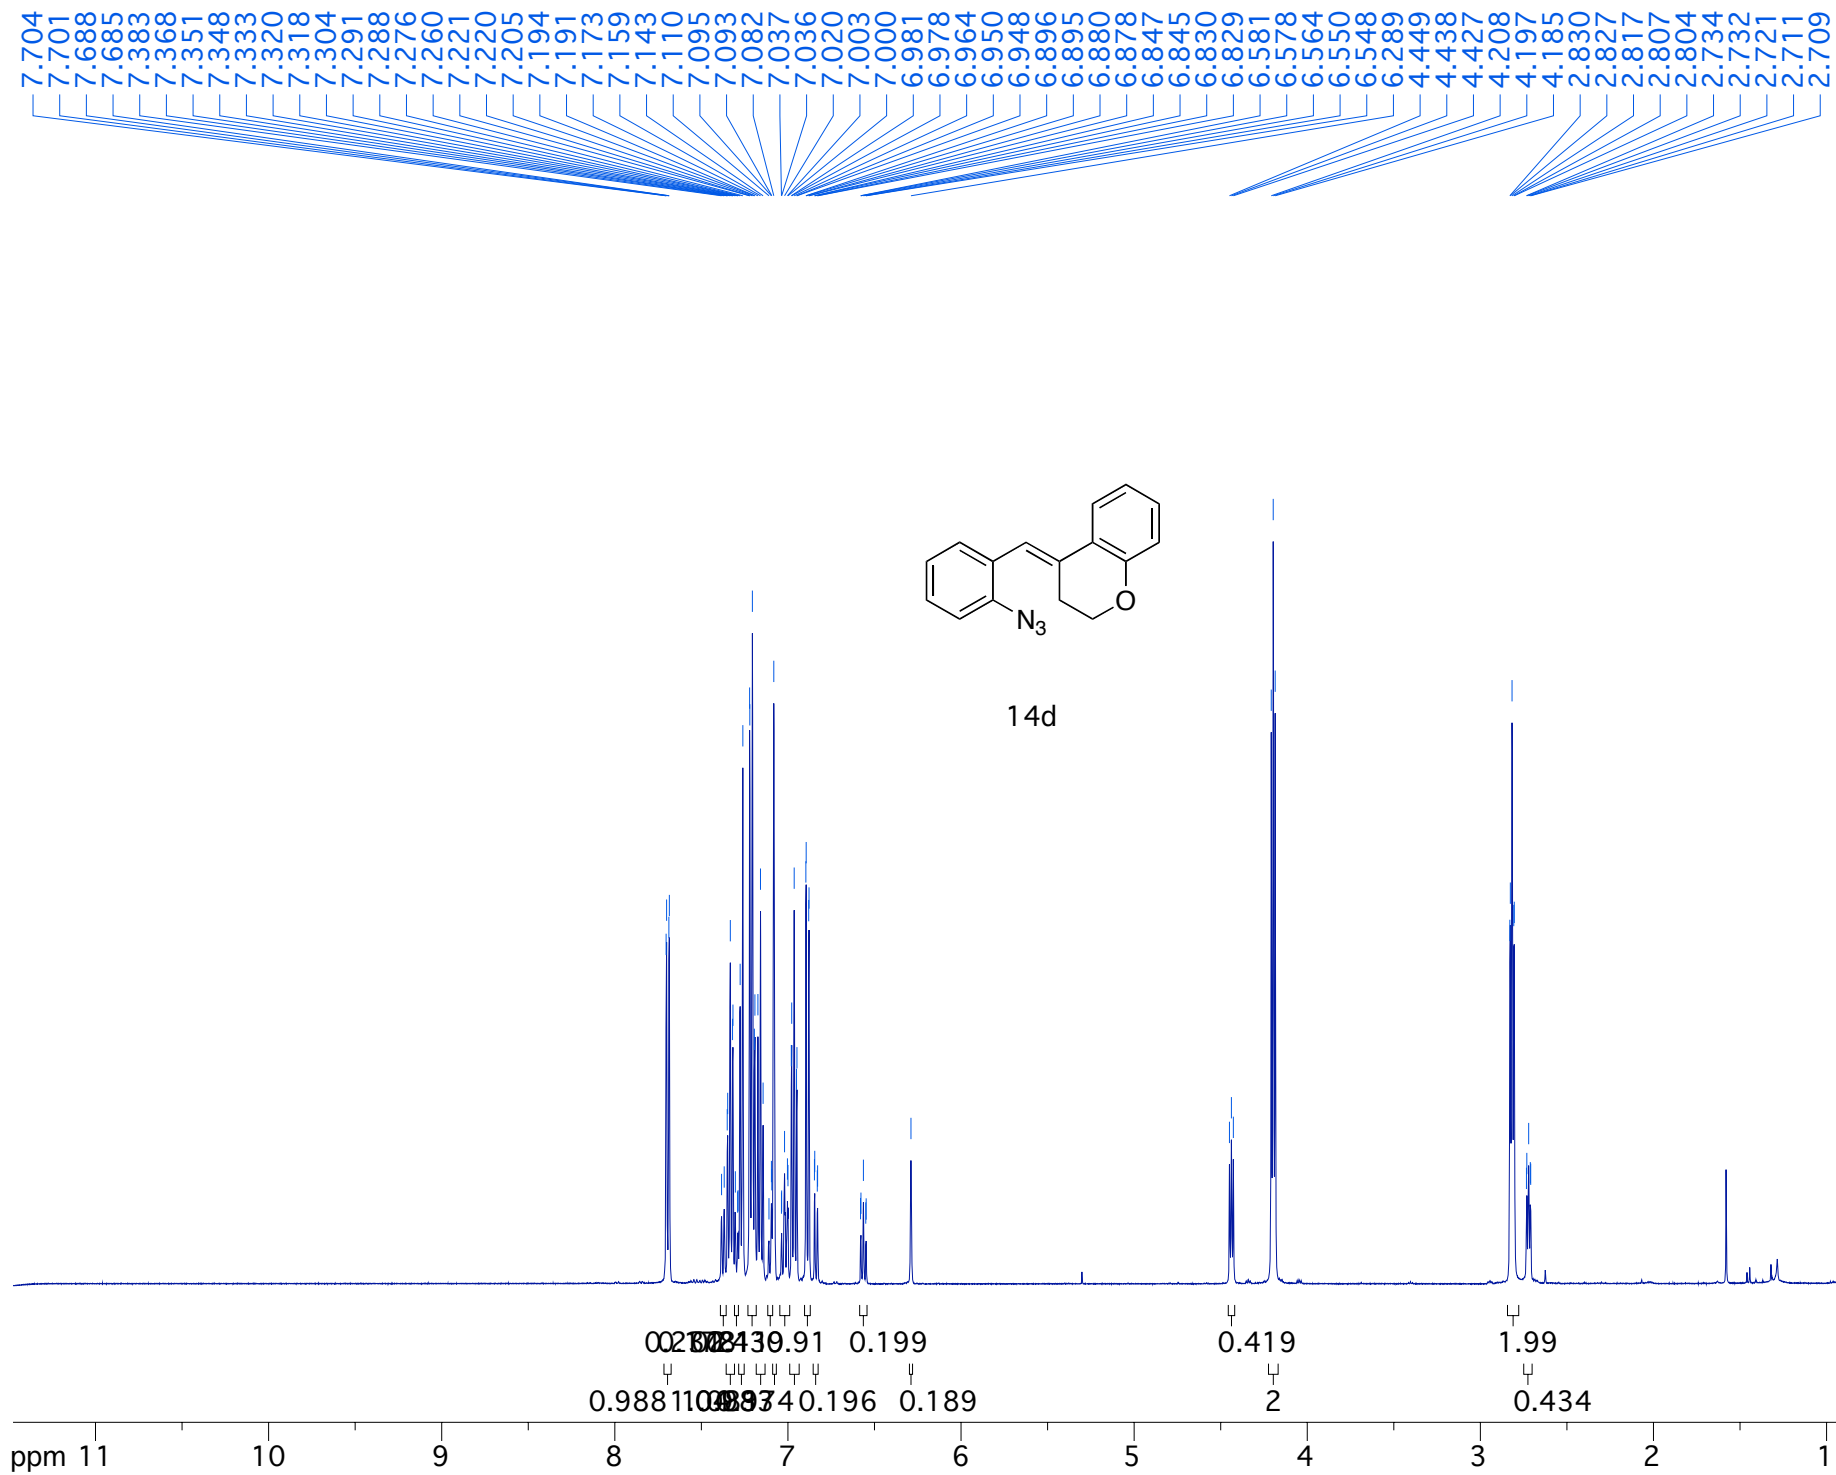

154.928  
154.882  
138.699  
138.080  
132.483  
132.129  
131.058  
130.925  
129.662  
129.470  
128.810  
128.526  
128.503  
128.340  
124.757  
124.727  
124.315  
122.405  
120.877  
120.598  
119.981  
119.334  
118.613  
118.424  
117.483  
117.061  
116.984

77.349  
77.098  
76.846

67.432  
66.228

33.320

26.930

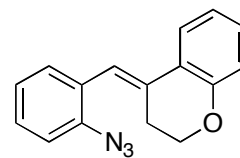

14d

ppm 220 200 180 160 140 120 100 80 60 40 20 0

7.260  
7.190  
7.178  
7.164  
7.107  
7.099  
7.096  
7.093  
7.084  
7.081  
7.069  
7.066  
6.833  
6.819  
6.808  
6.793  
6.730  
6.714  
6.114

3.711  
2.986  
2.975  
2.970  
2.965  
2.959  
2.955  
2.950  
2.944  
2.939  
2.924  
2.921  
2.162  
2.156  
2.147  
2.141  
2.131  
2.127  
2.115  
2.113  
2.100

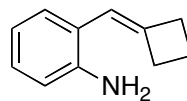

s18

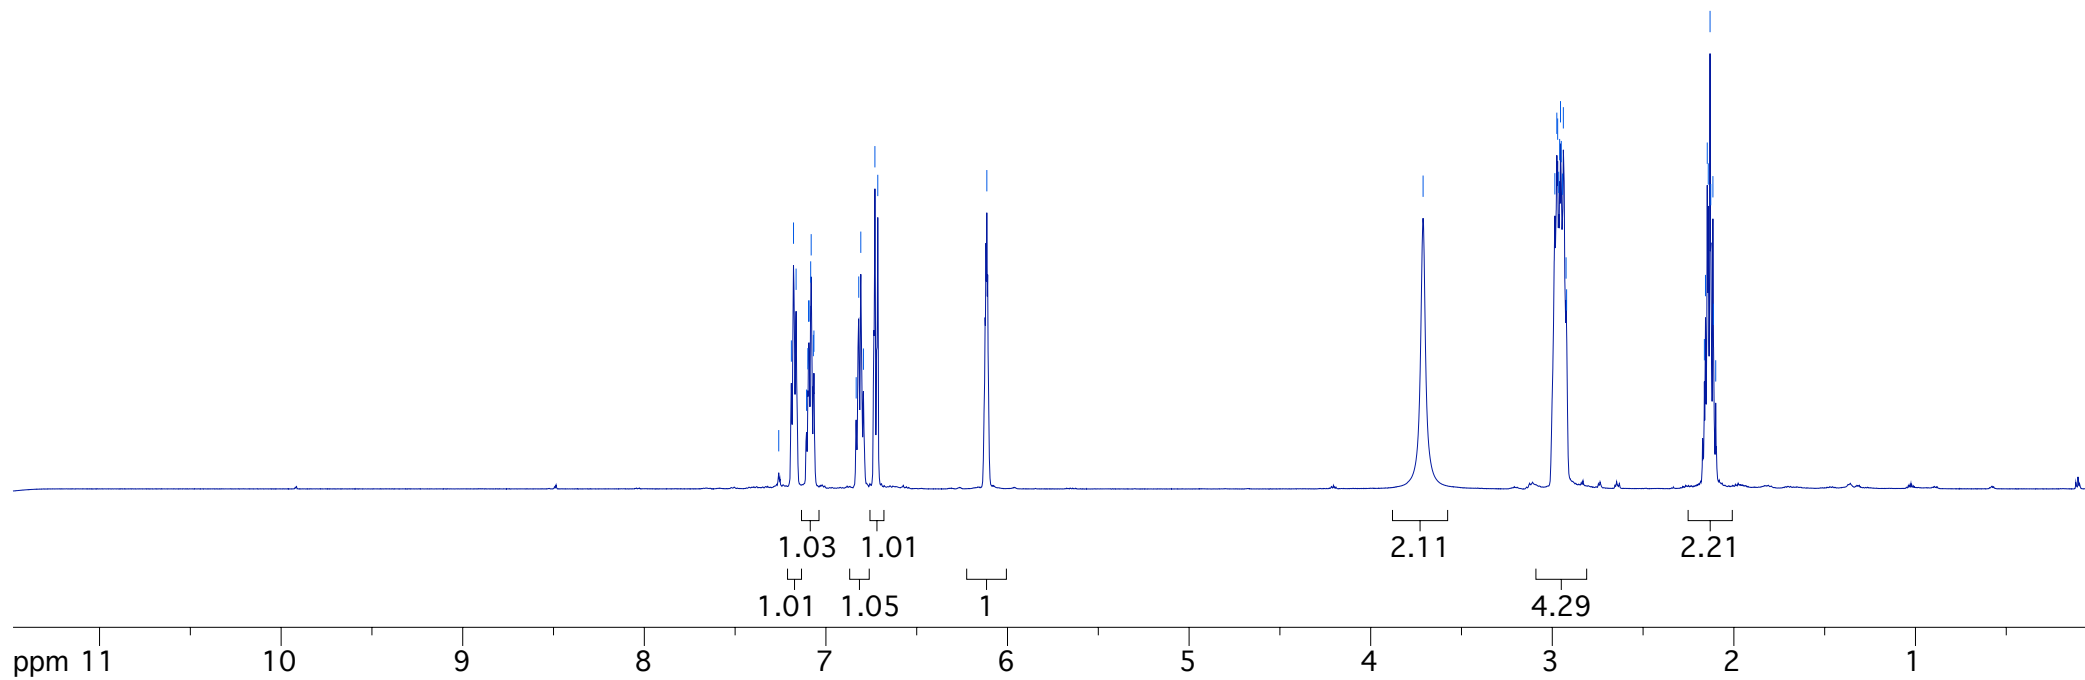

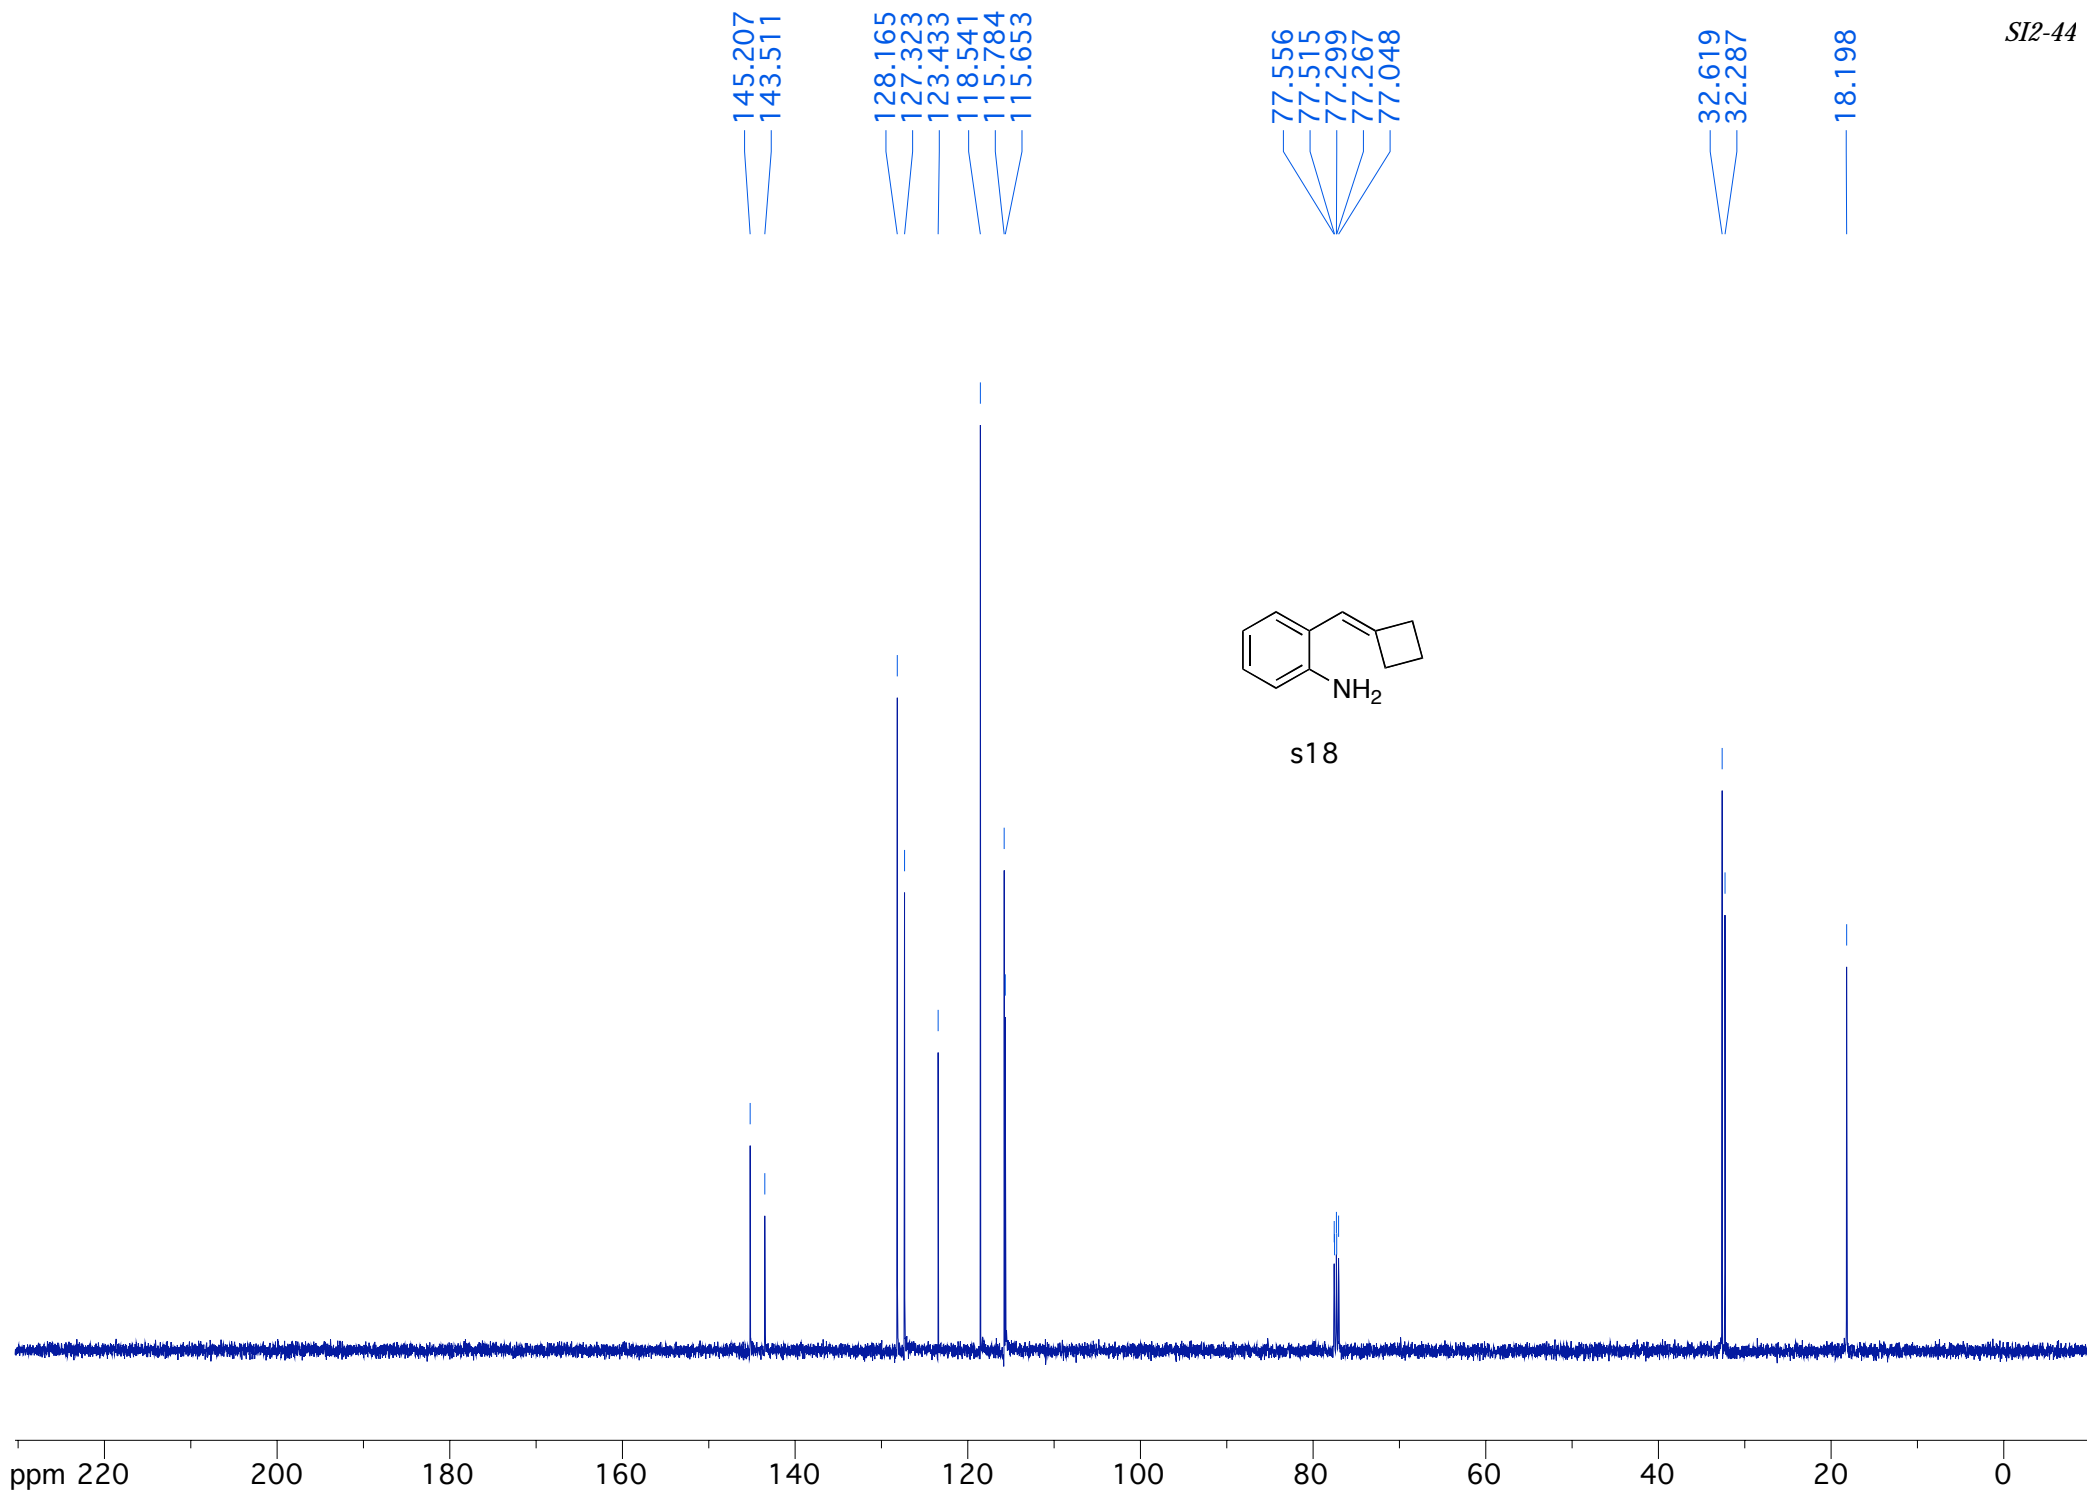

7.260  
7.087  
7.072  
7.056  
6.994  
6.979  
6.747  
6.732  
6.718  
6.710  
6.694  
6.136

3.806  
3.795  
3.784  
3.692  
3.674  
3.663  
3.652

2.438  
2.427  
2.417  
2.371  
2.360  
2.349

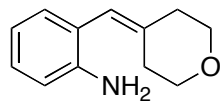

s19

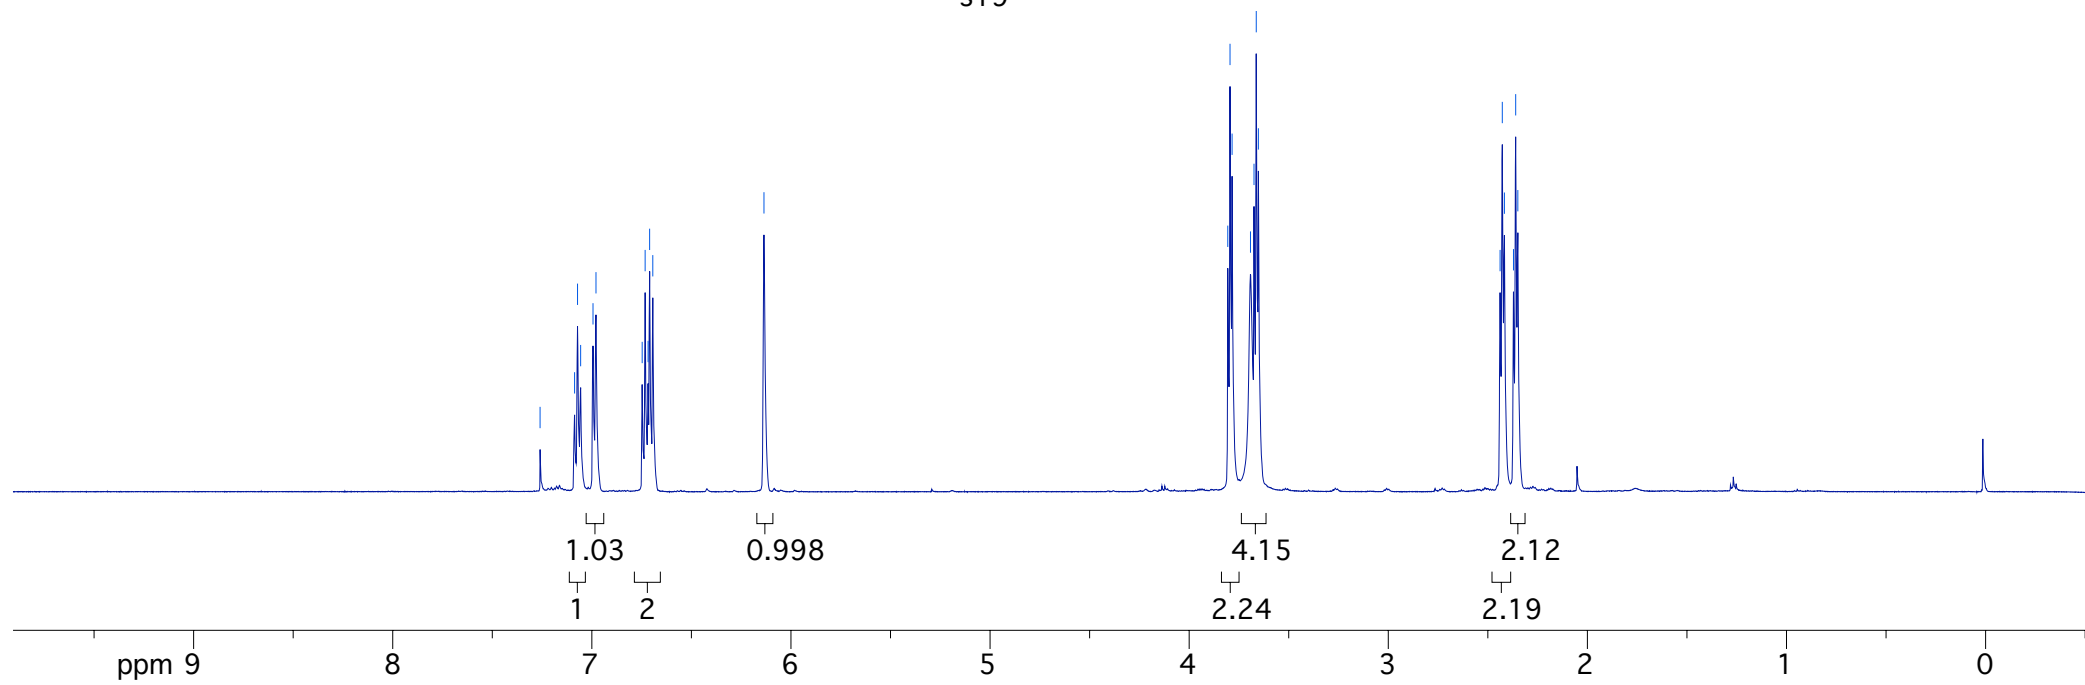

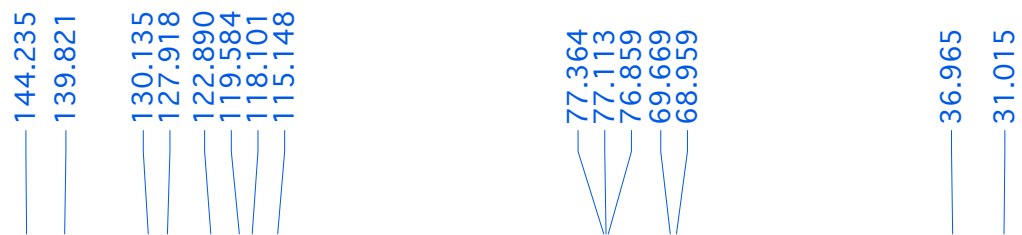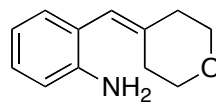

s19

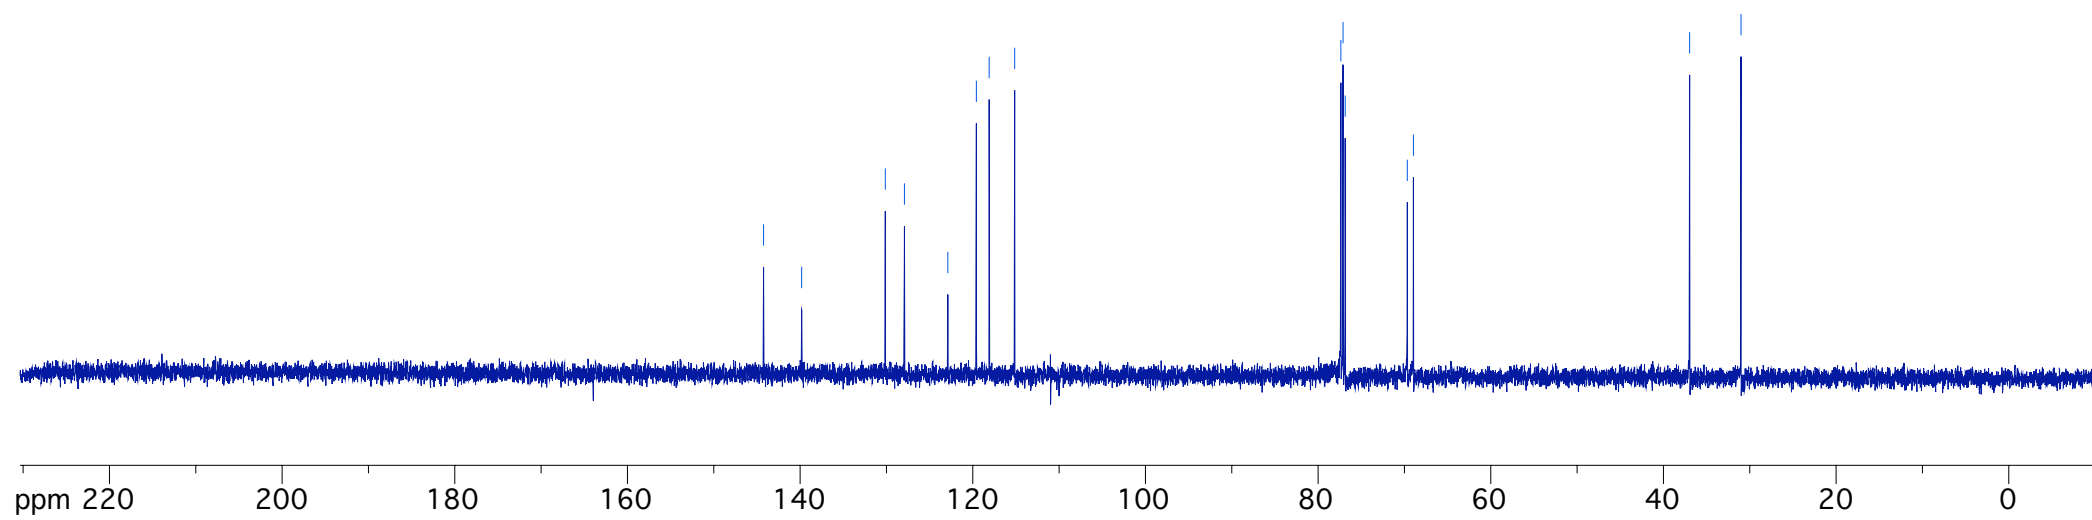

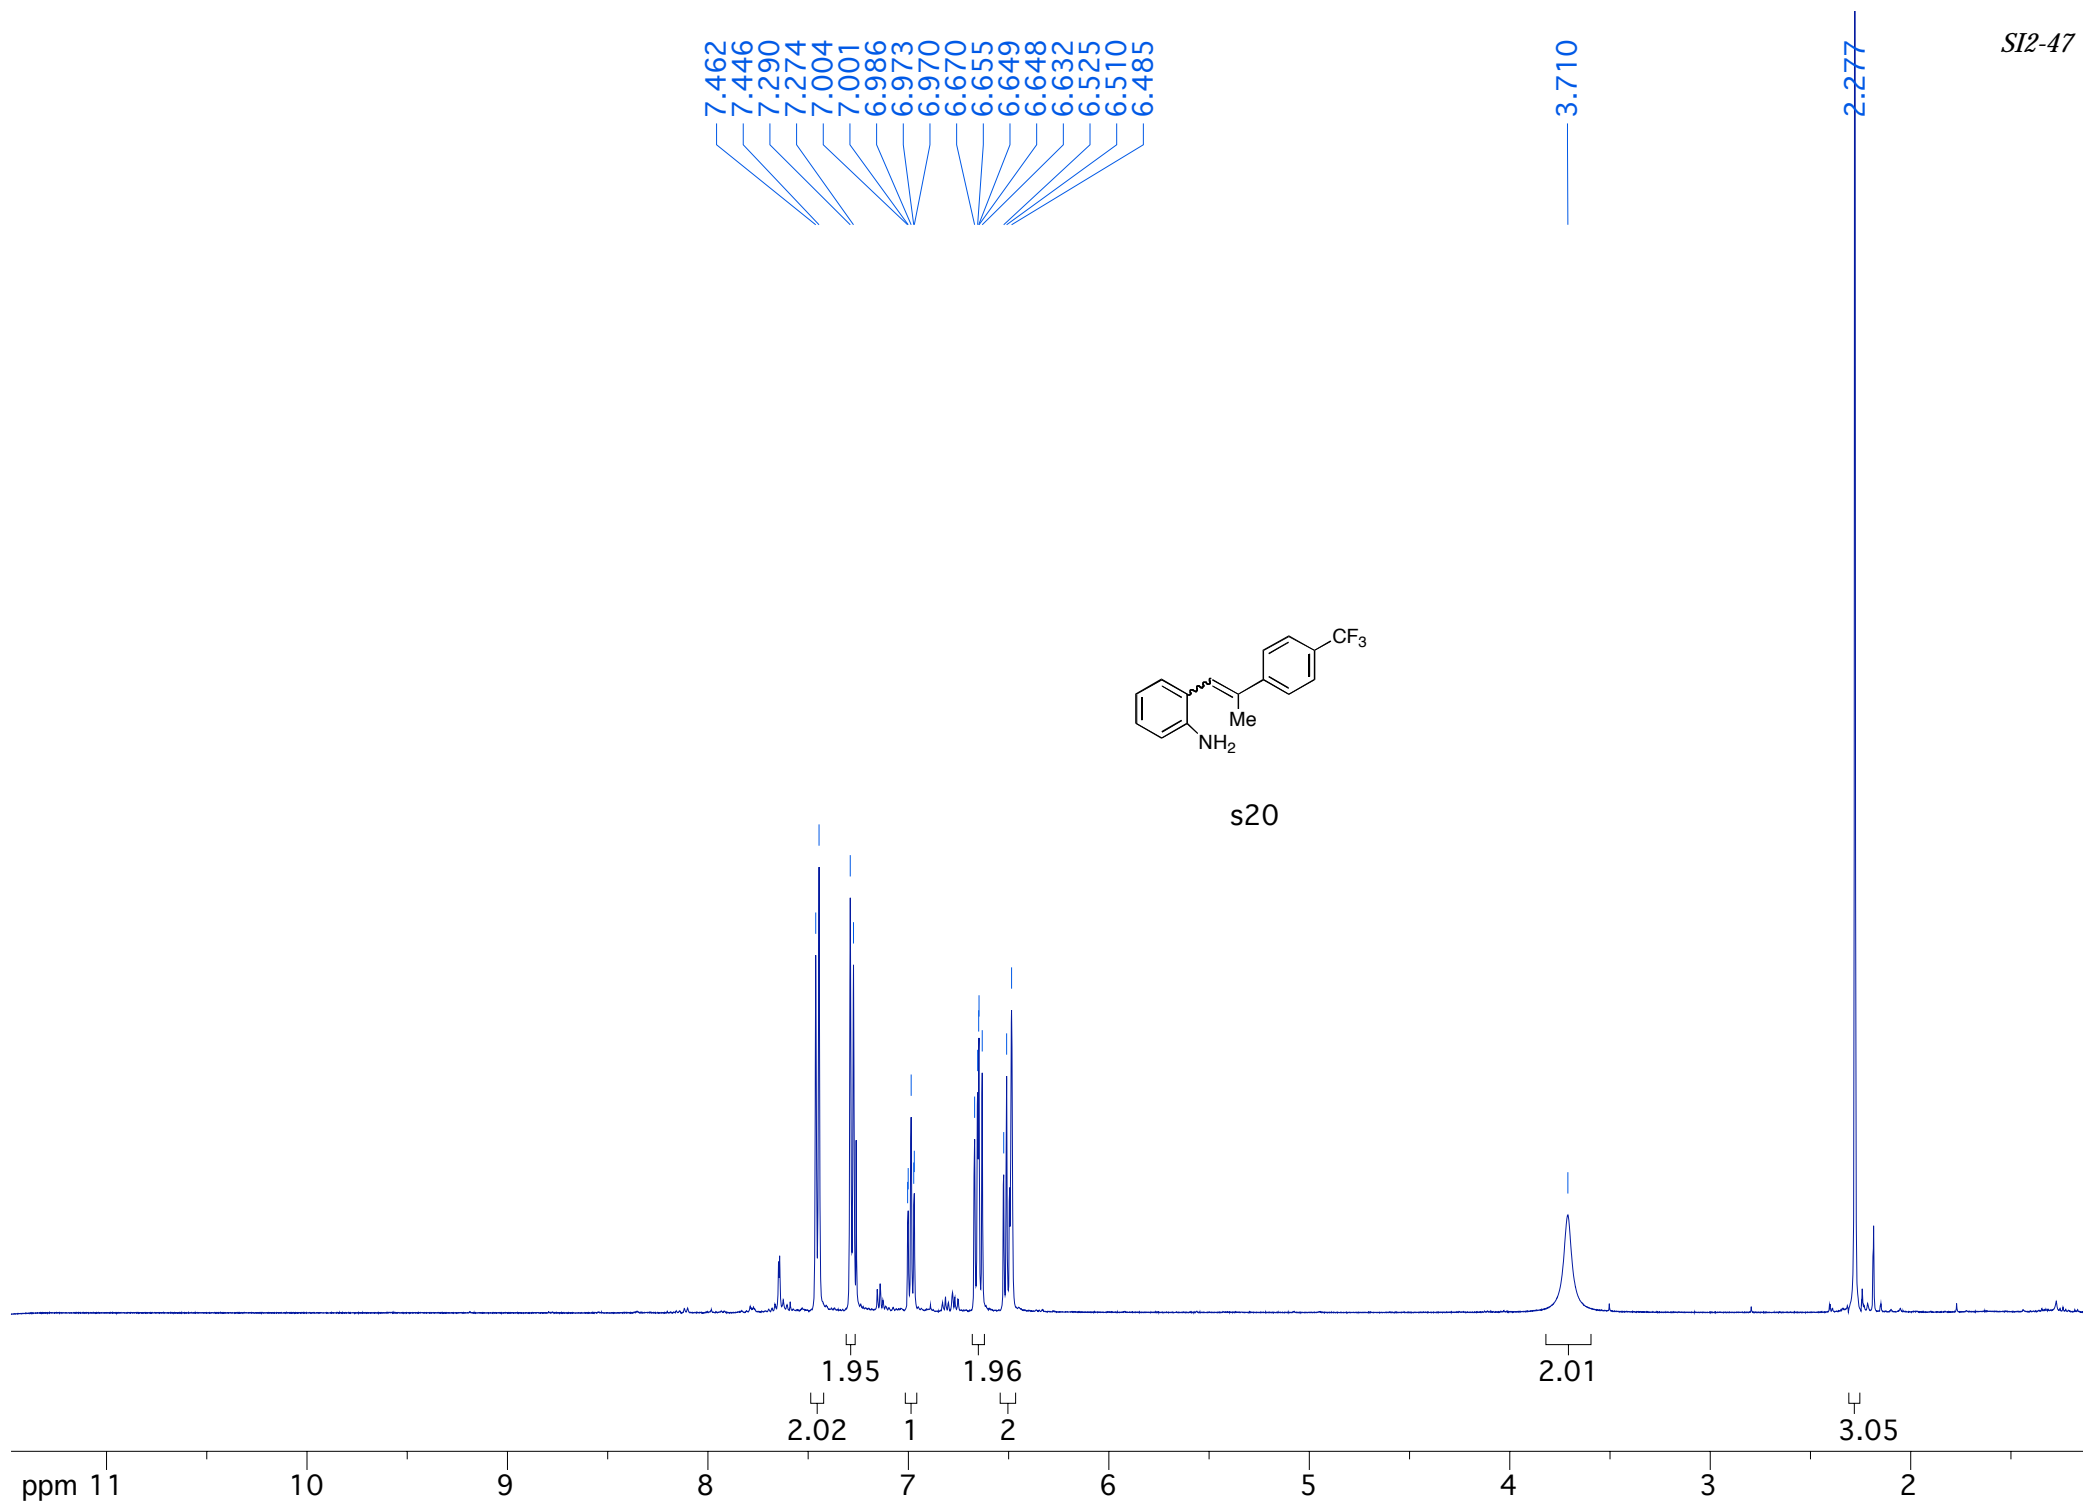

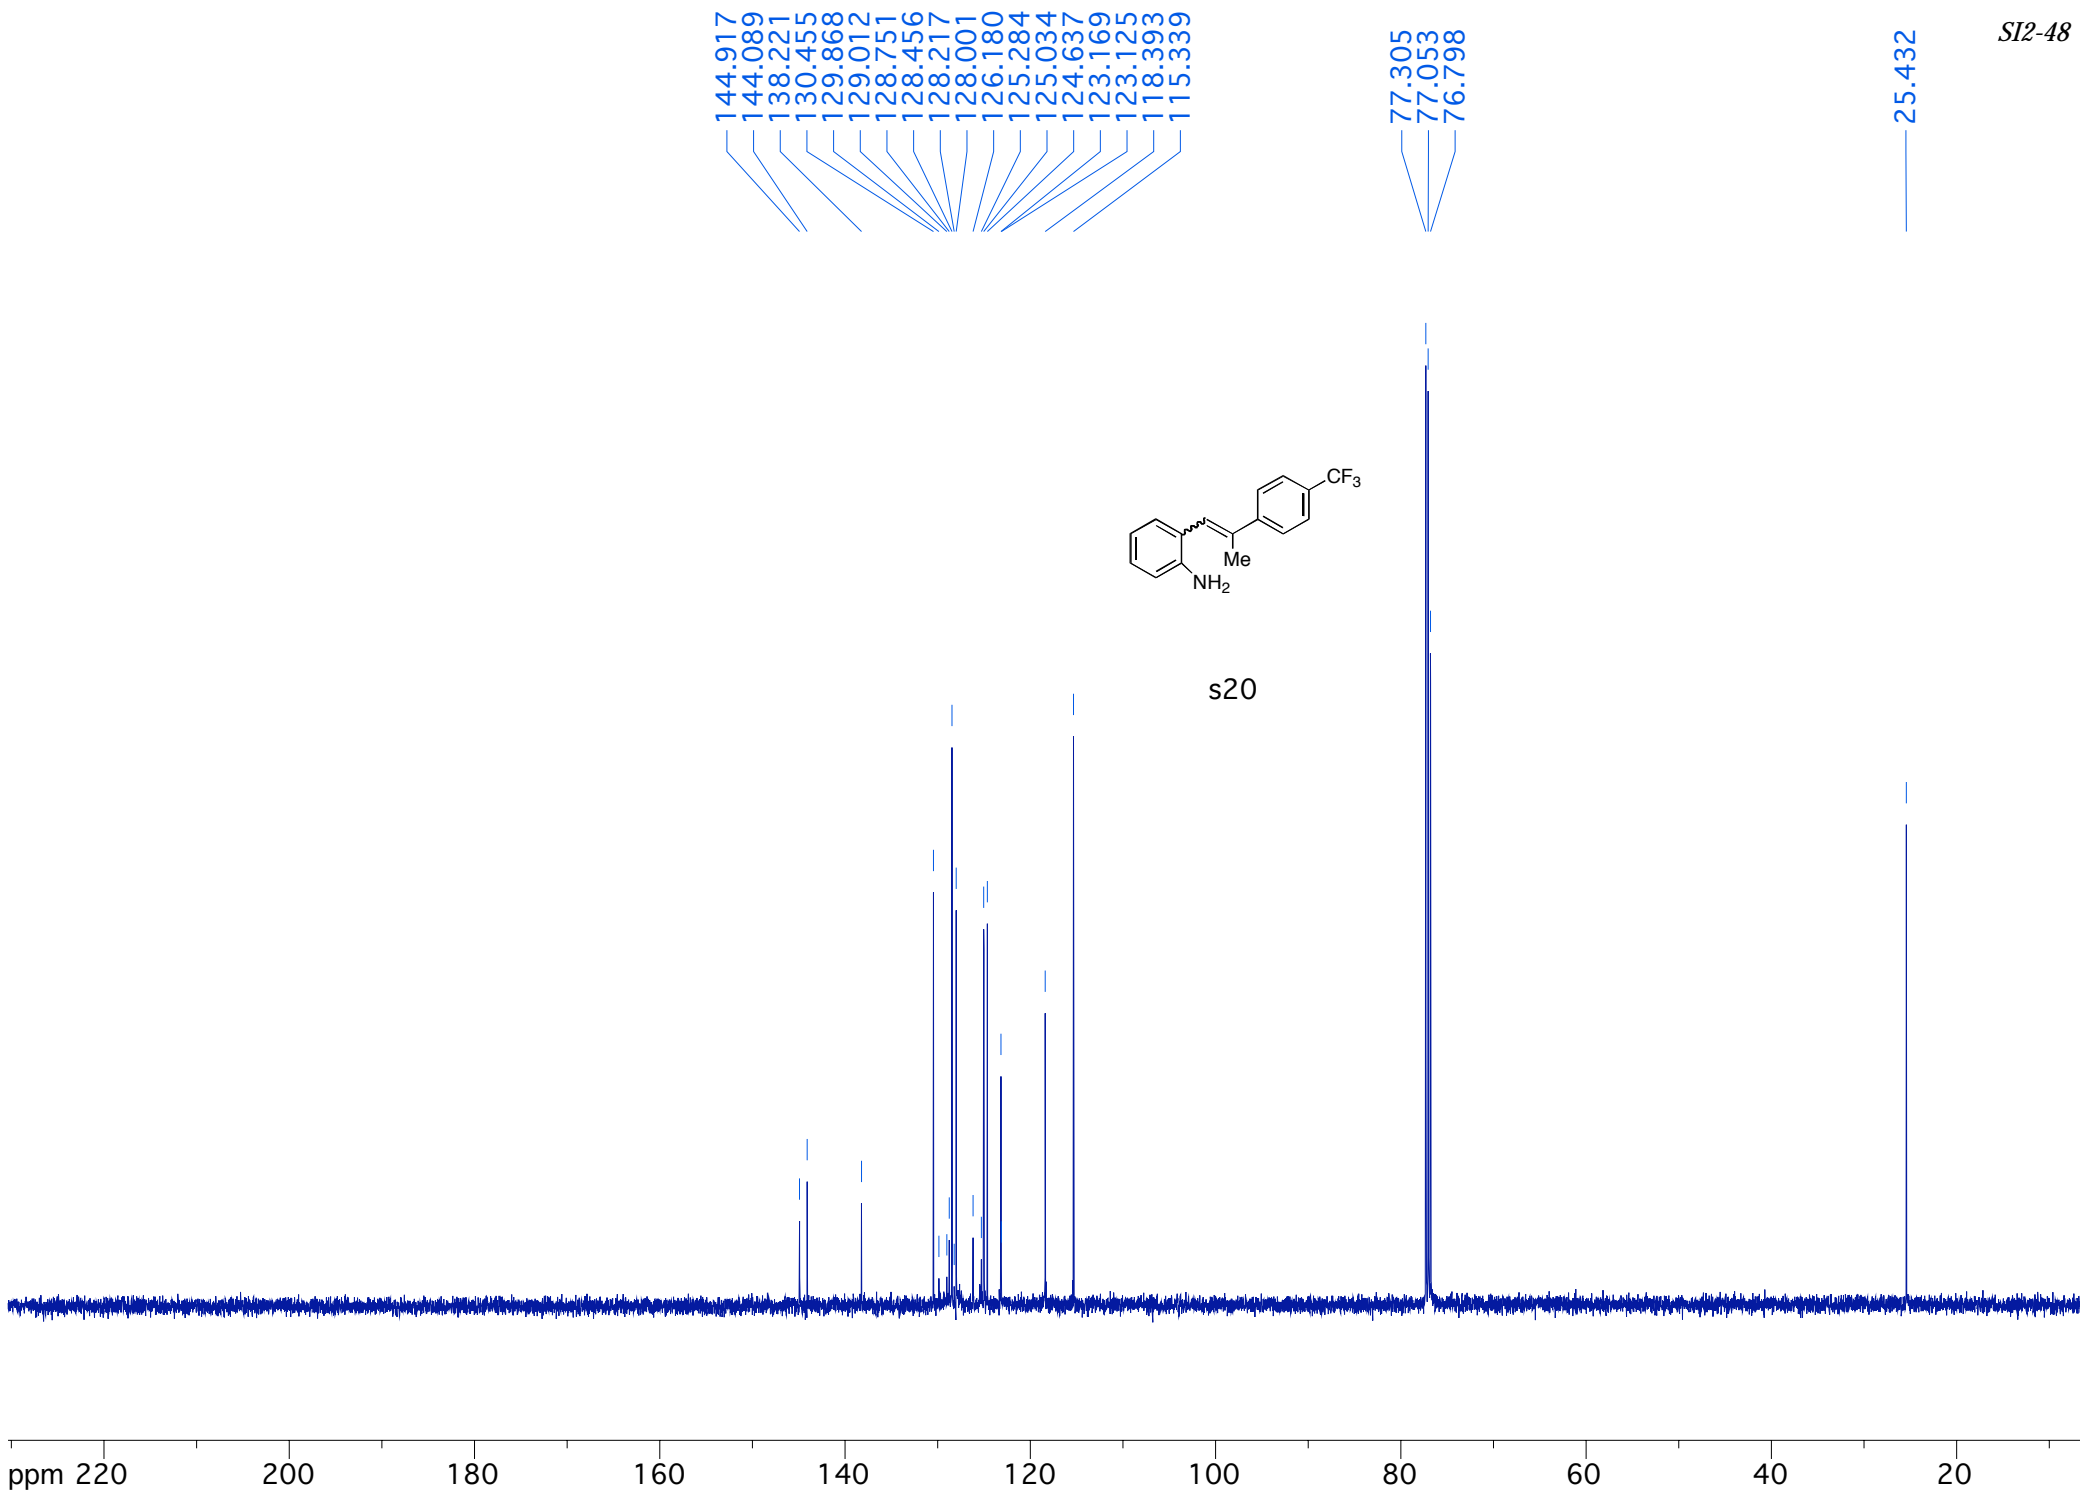



7.521  
7.505  
7.288  
7.272  
7.203  
7.201  
7.187  
7.173  
7.170  
7.132  
7.131  
7.116  
7.115  
6.829  
6.827  
6.813  
6.799  
6.797  
6.748  
6.733  
6.647

2.290

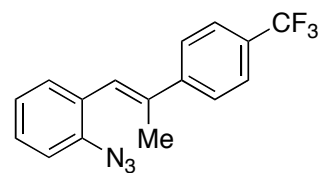

14f

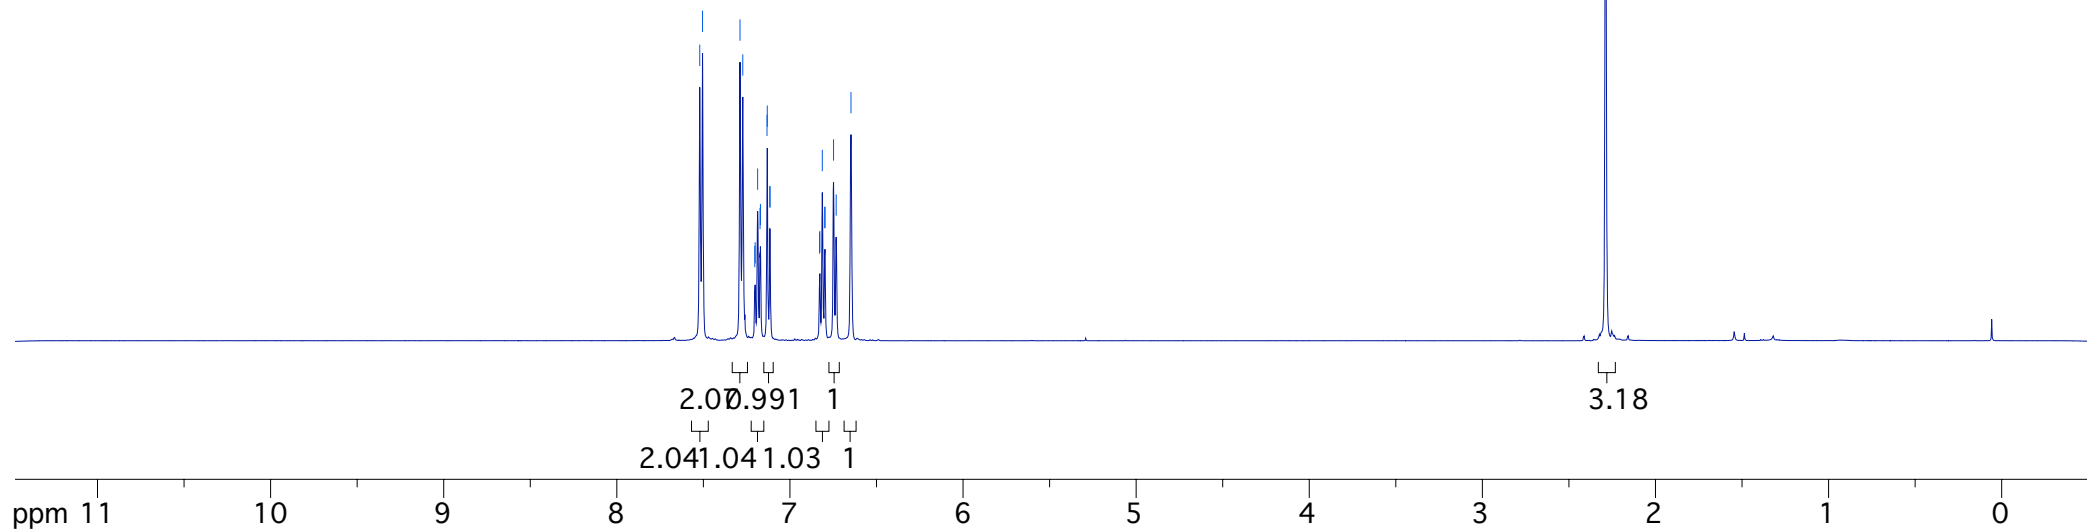

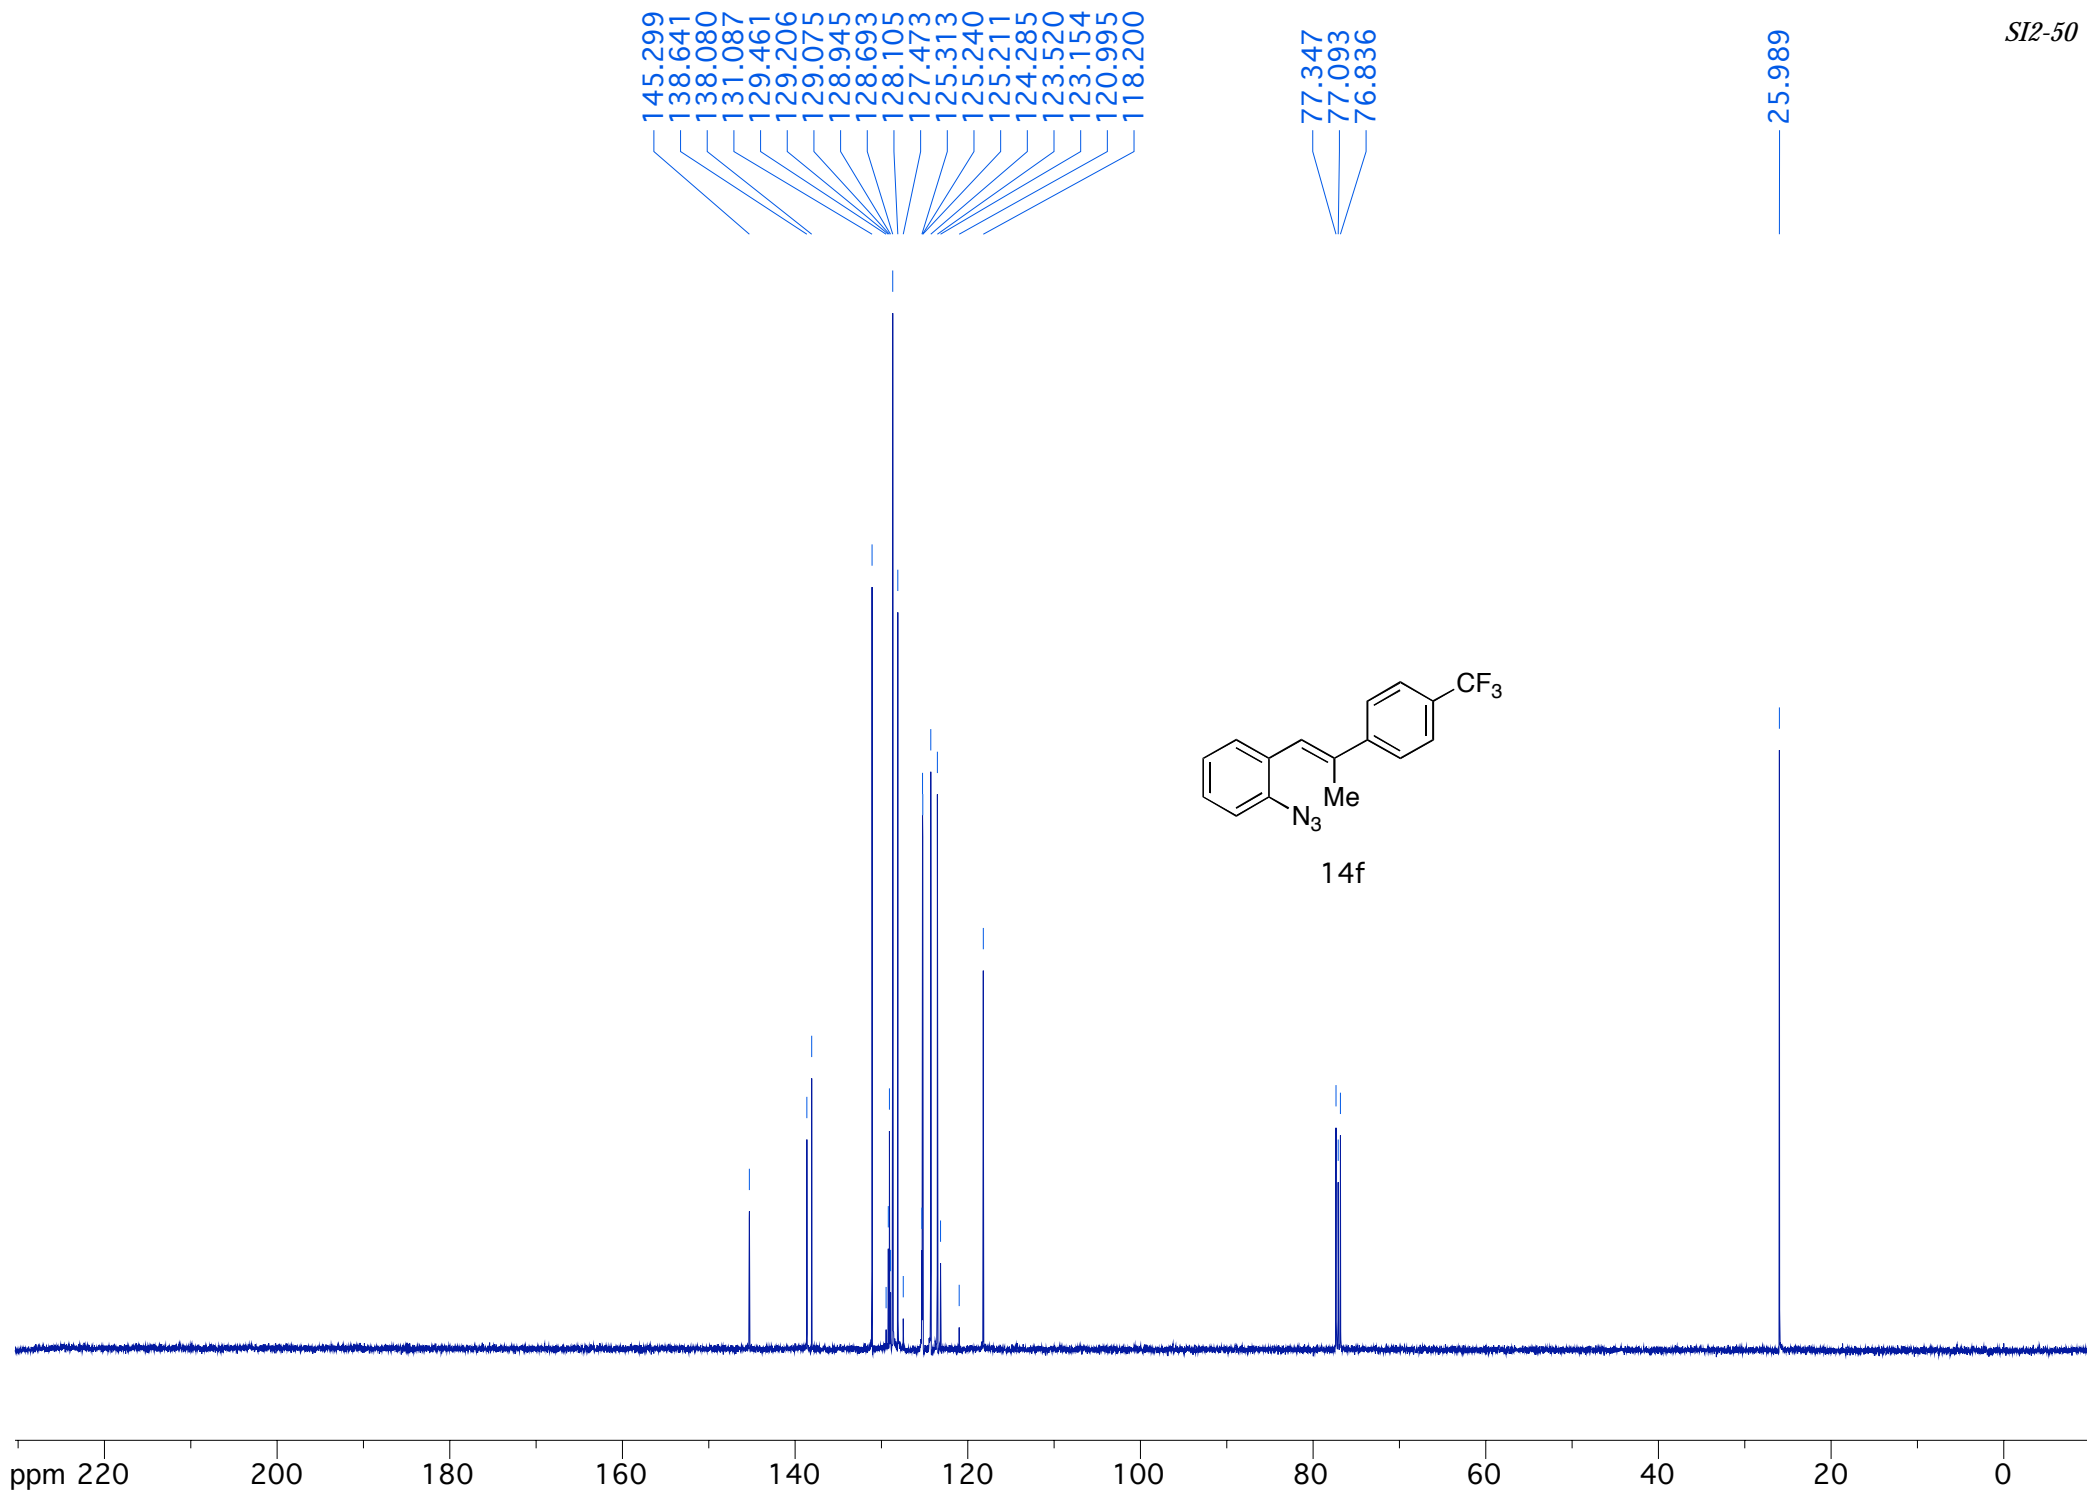

7.306  
7.290  
7.242  
7.226  
7.211  
7.160  
7.144  
7.123  
7.108  
7.093  
6.349

3.036  
3.034  
3.022  
3.006  
2.951  
2.948  
2.935  
2.923  
2.920  
2.157  
2.154  
2.142  
2.138  
2.126  
2.122

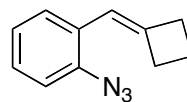

17a

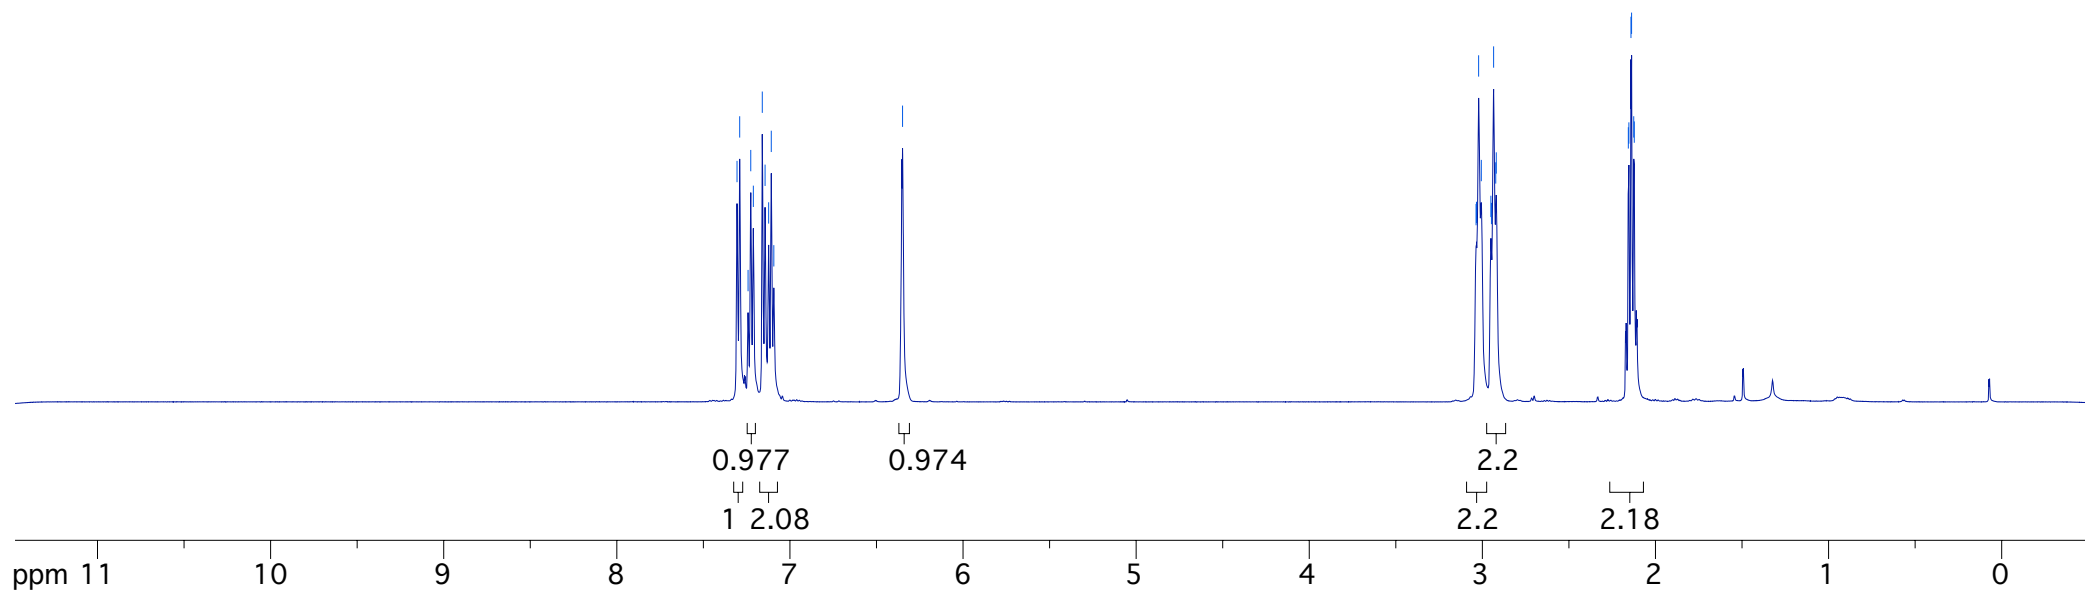

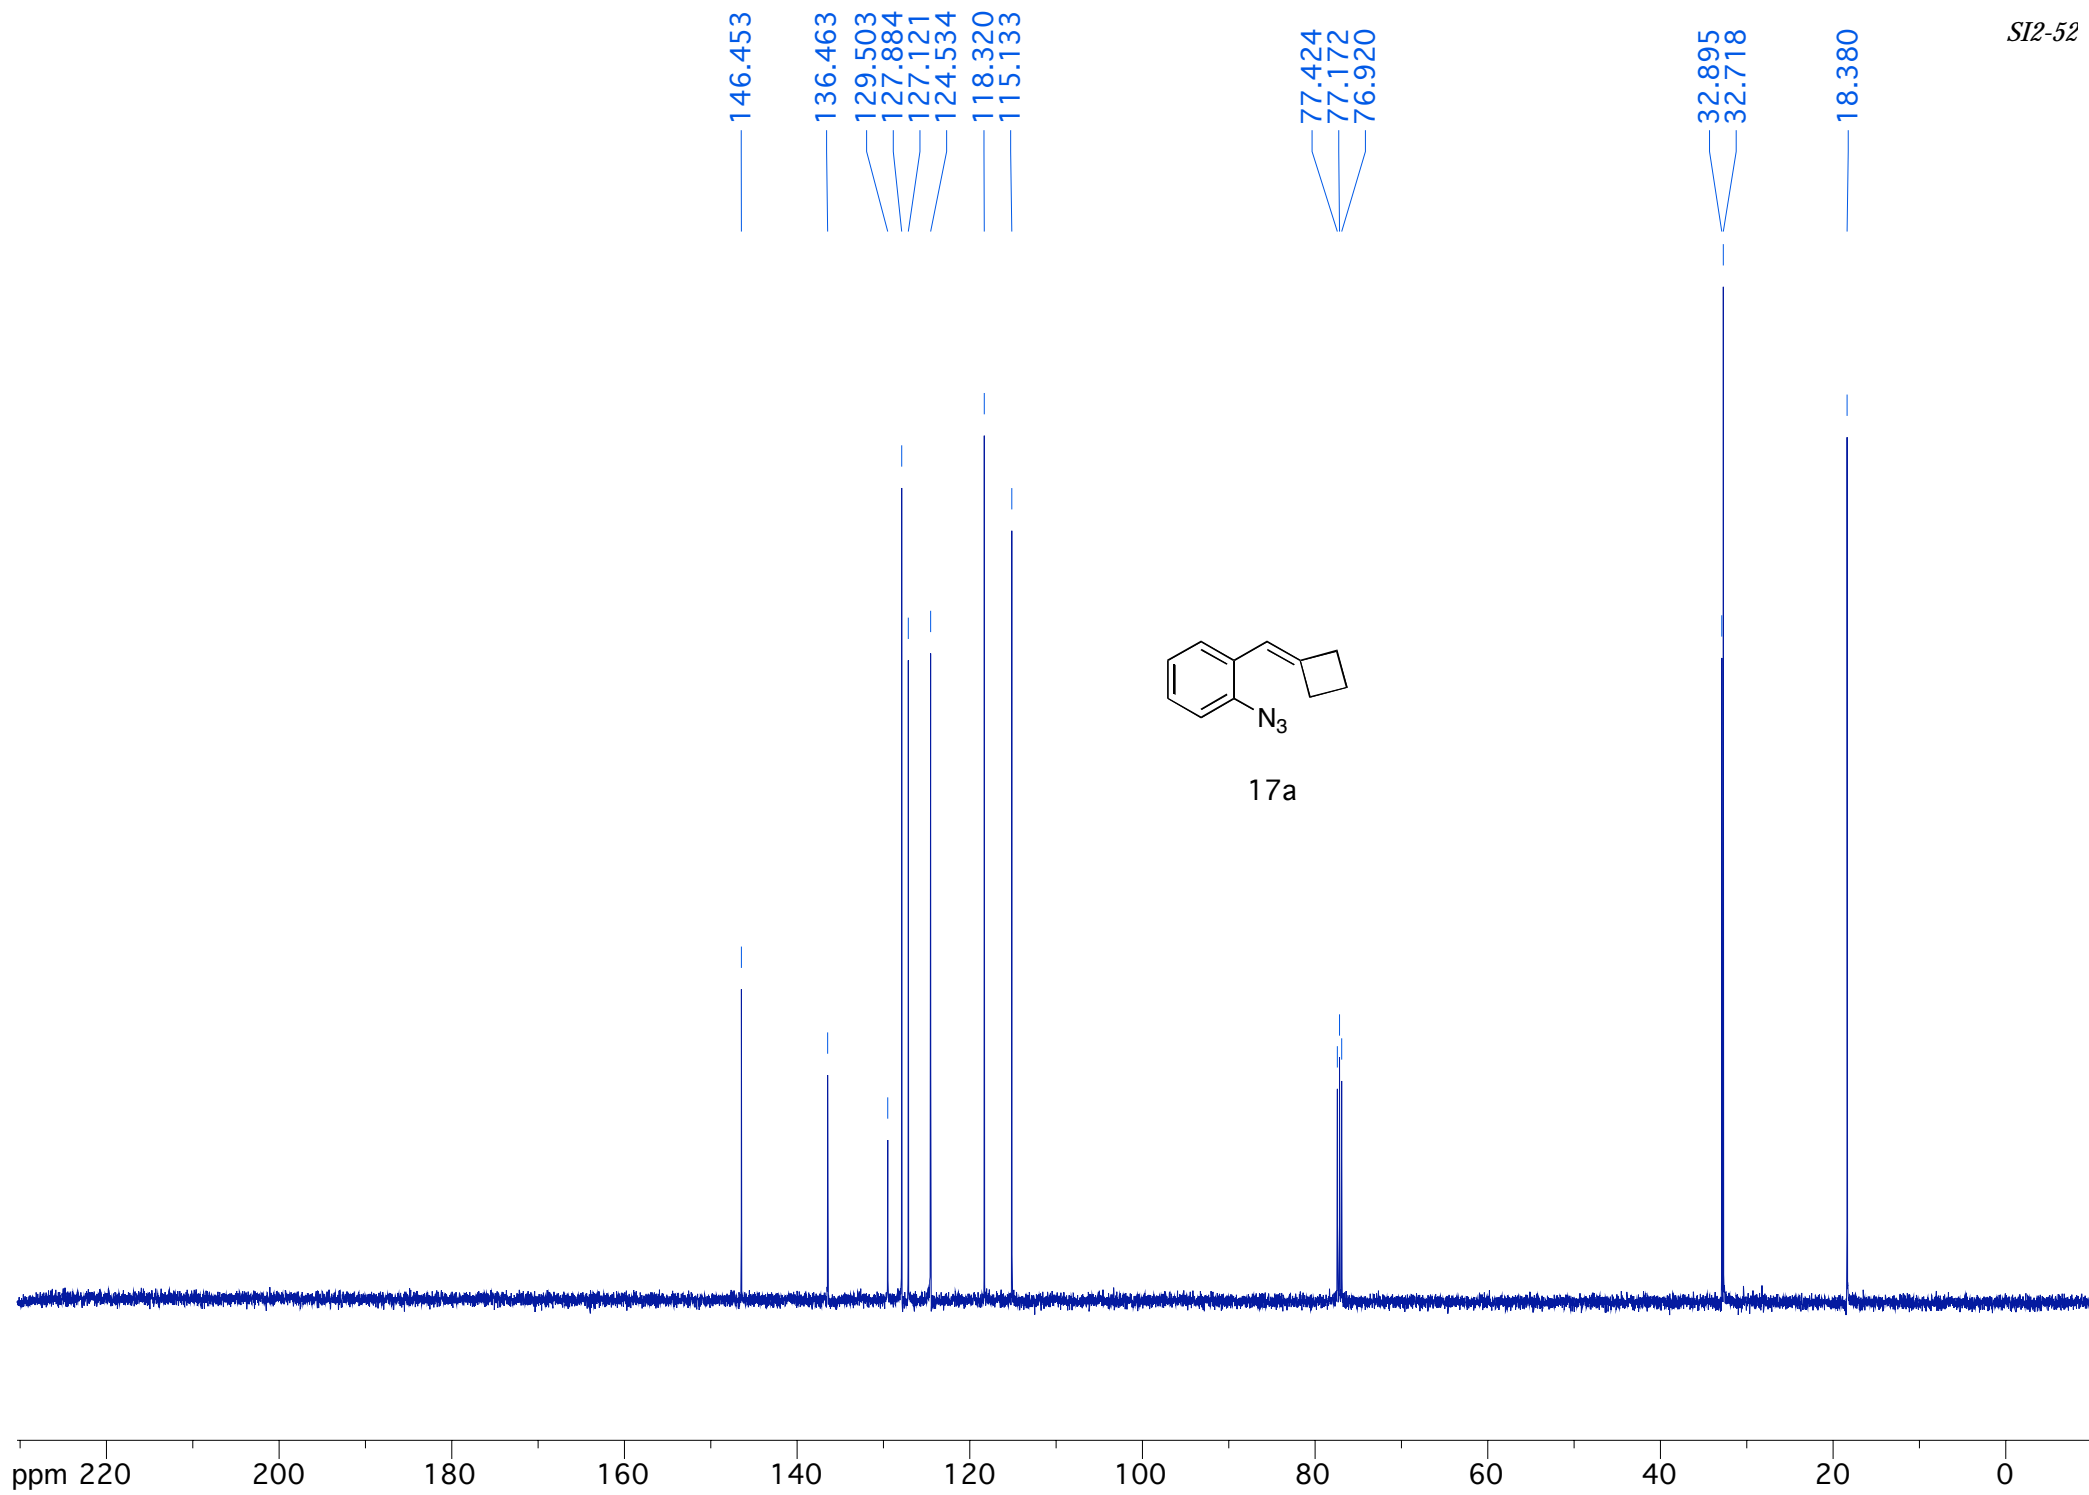

7.260  
7.253  
7.250  
7.235  
7.222  
7.219  
7.149  
7.134  
7.118  
7.102  
7.080  
7.065  
7.050  
6.242

3.782  
3.771  
3.761  
3.655  
3.644  
3.633

2.411  
2.400  
2.390  
2.380  
2.369

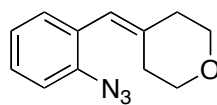

17h

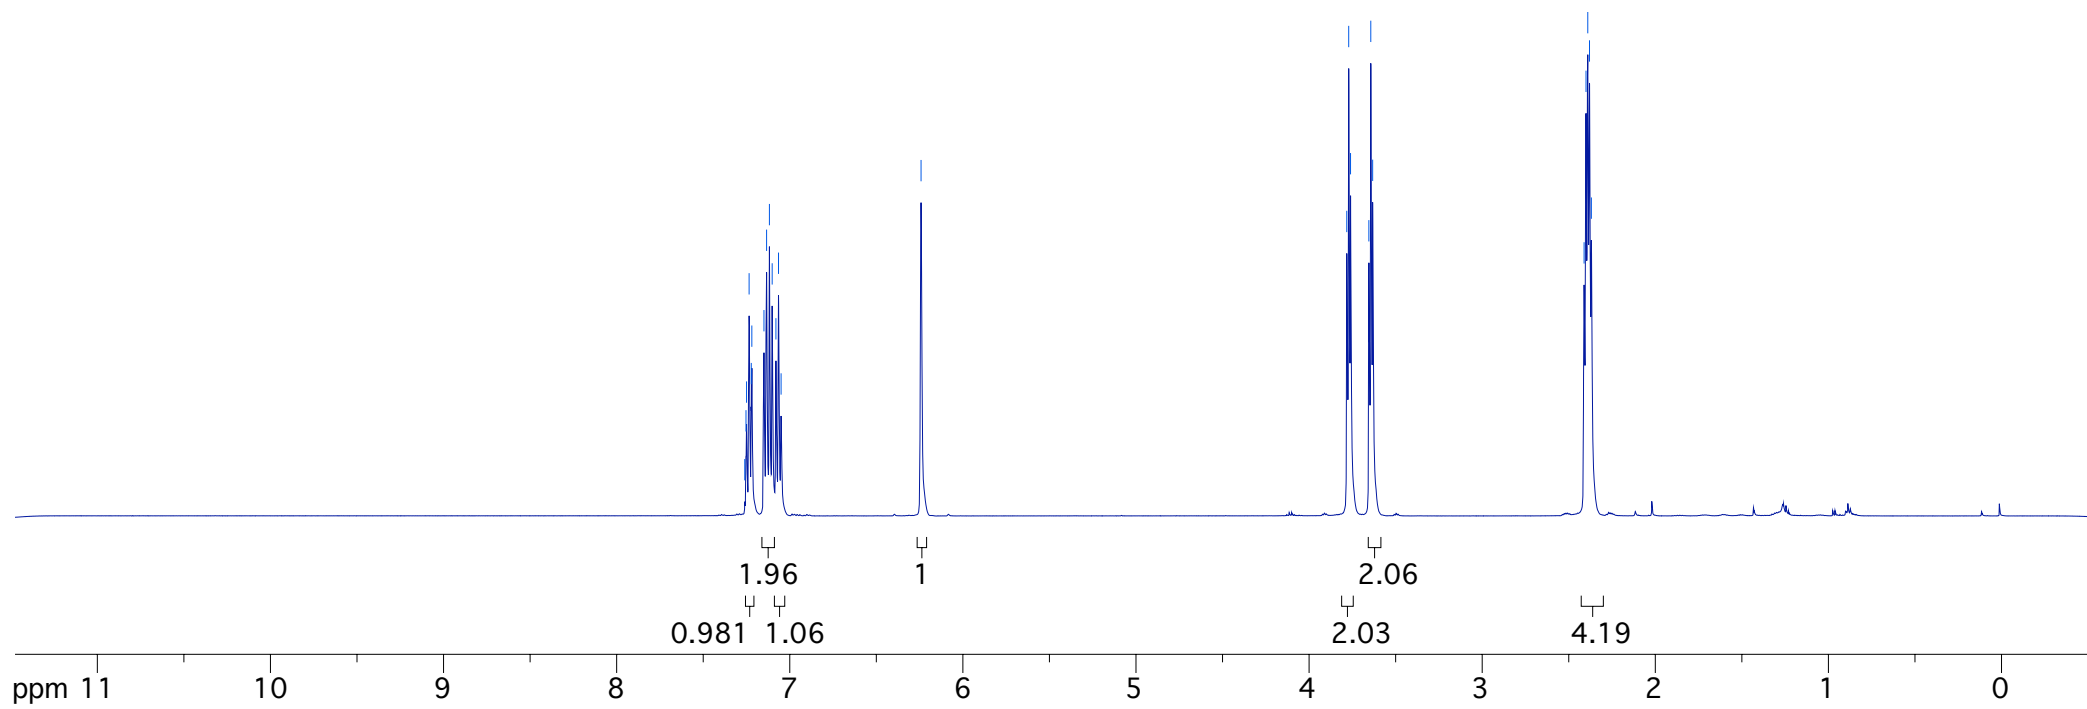

139.254  
138.064  
130.836  
129.146  
127.971  
124.343  
119.275  
118.423

77.557  
77.304  
77.052  
69.401  
68.560

37.165  
30.942

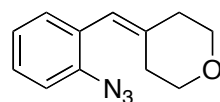

17h

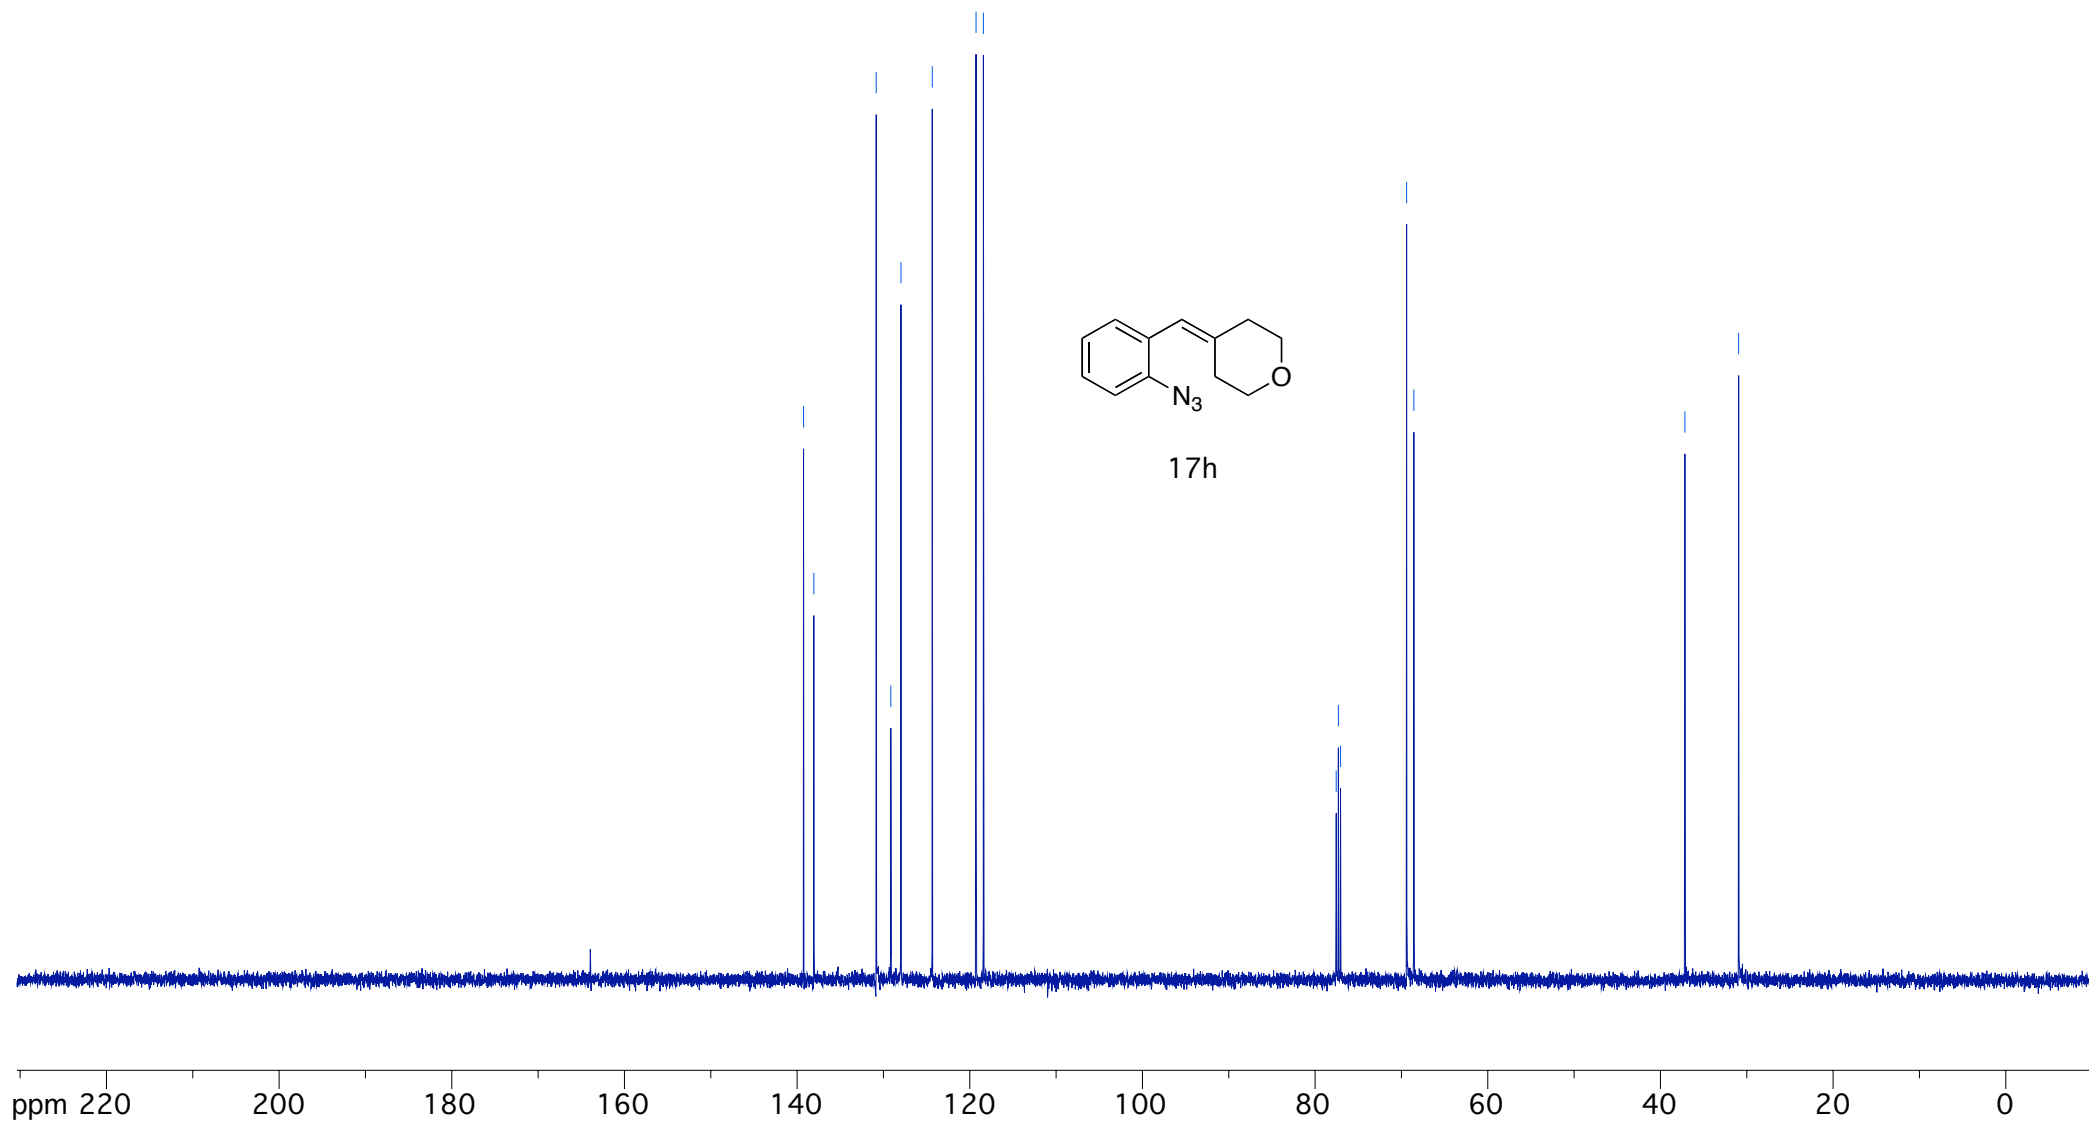

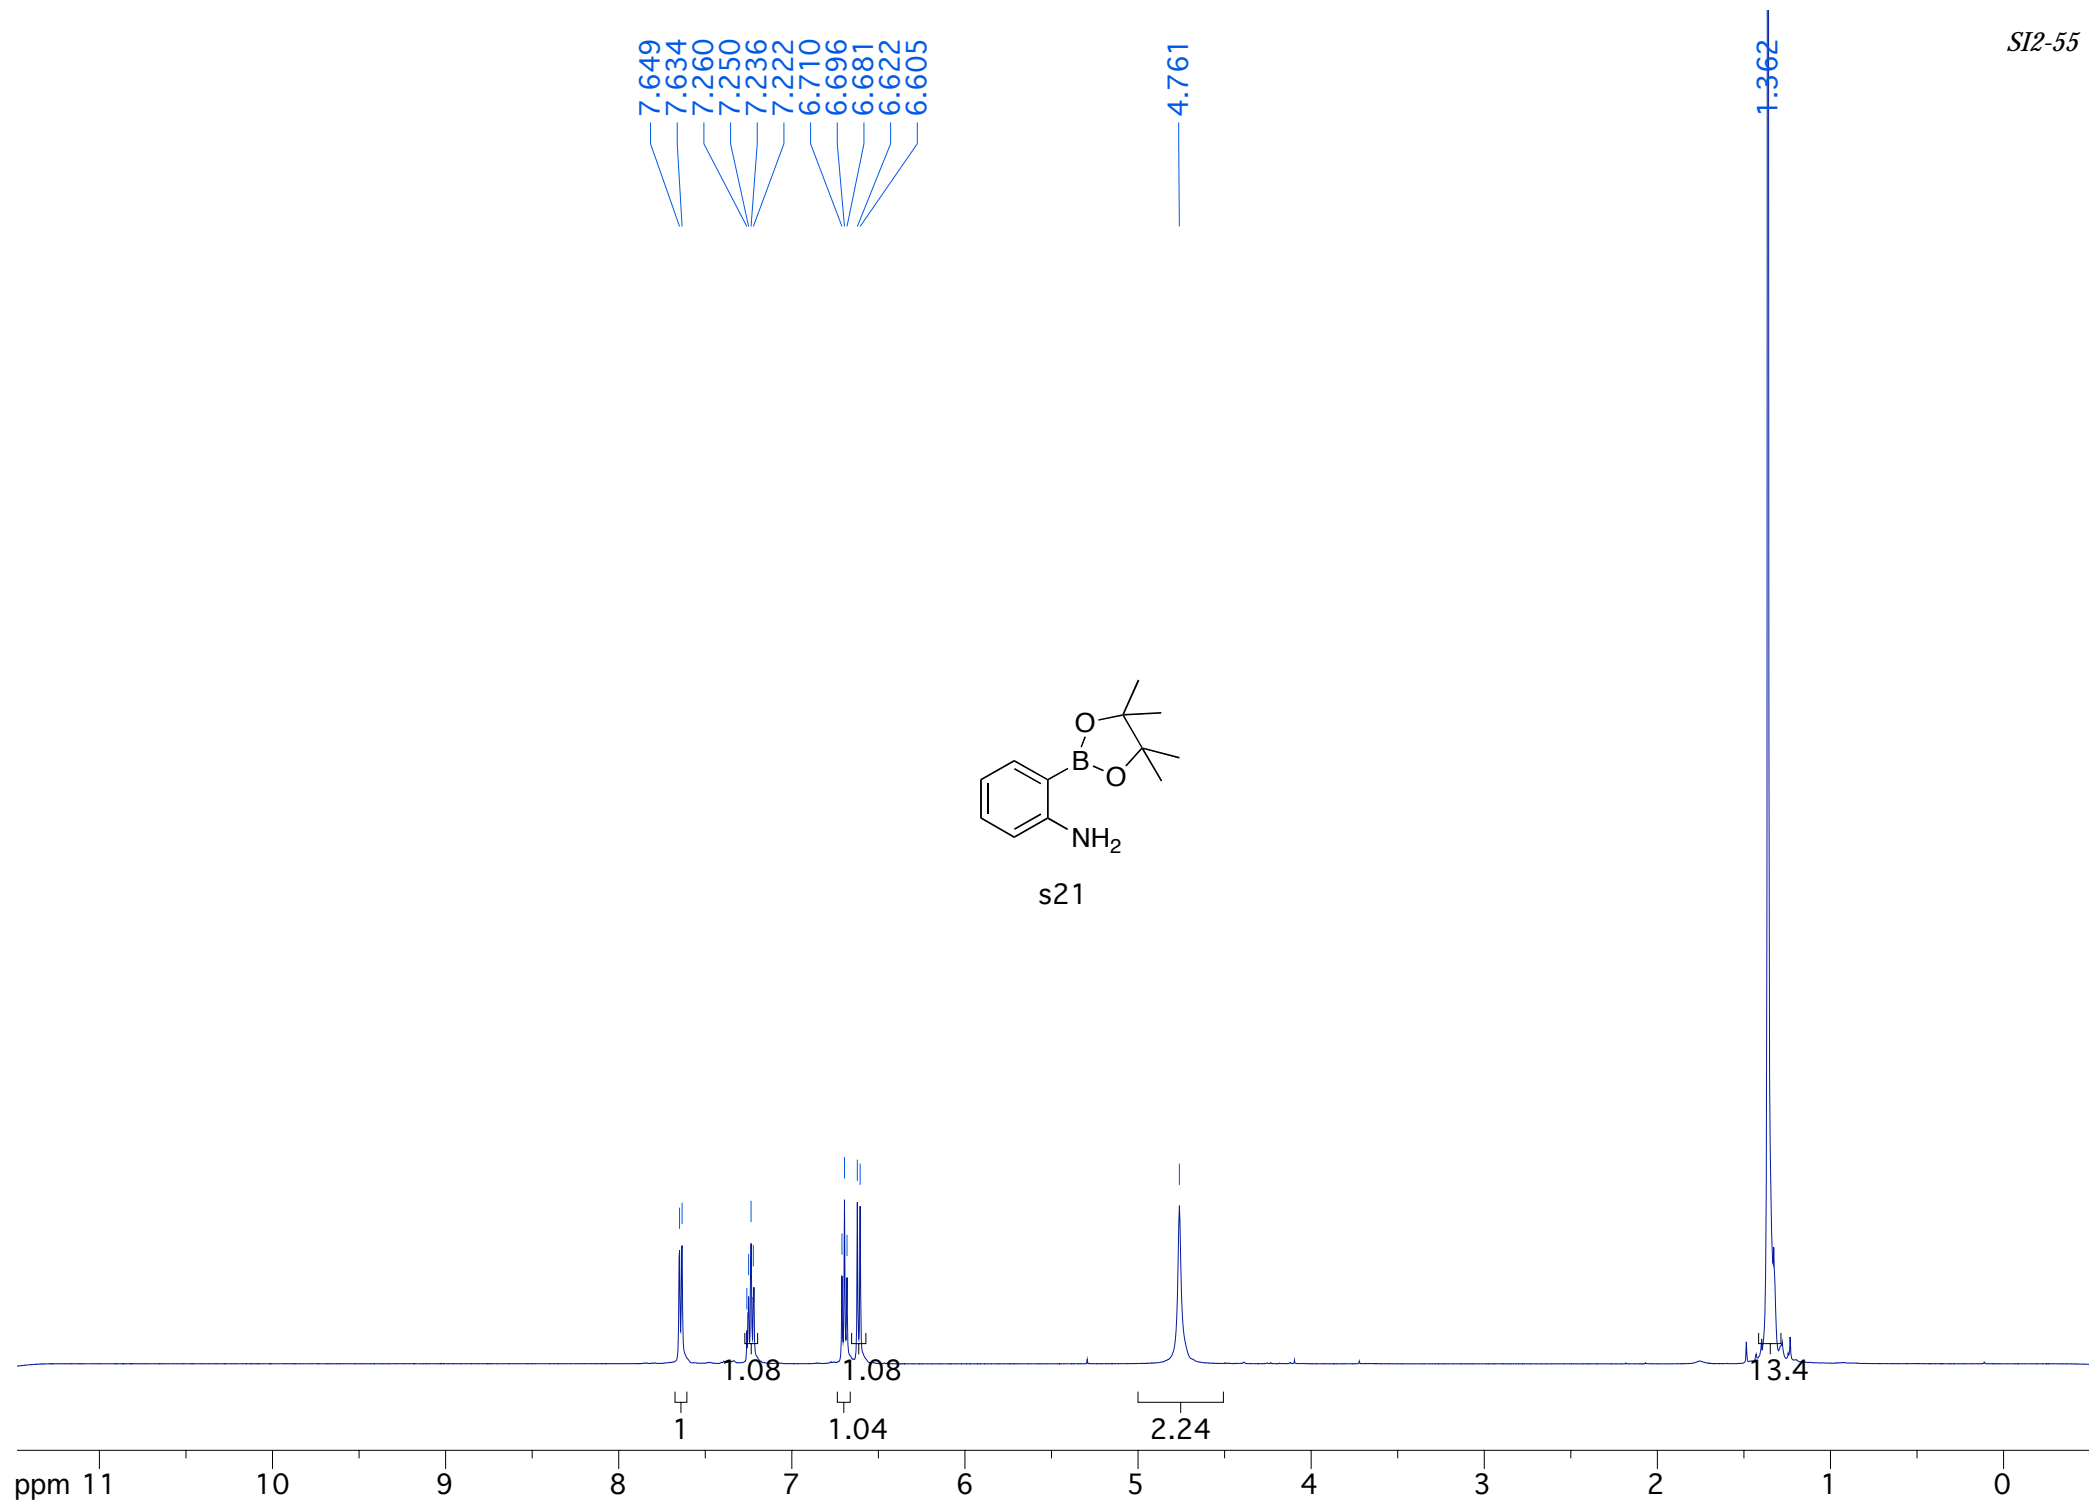

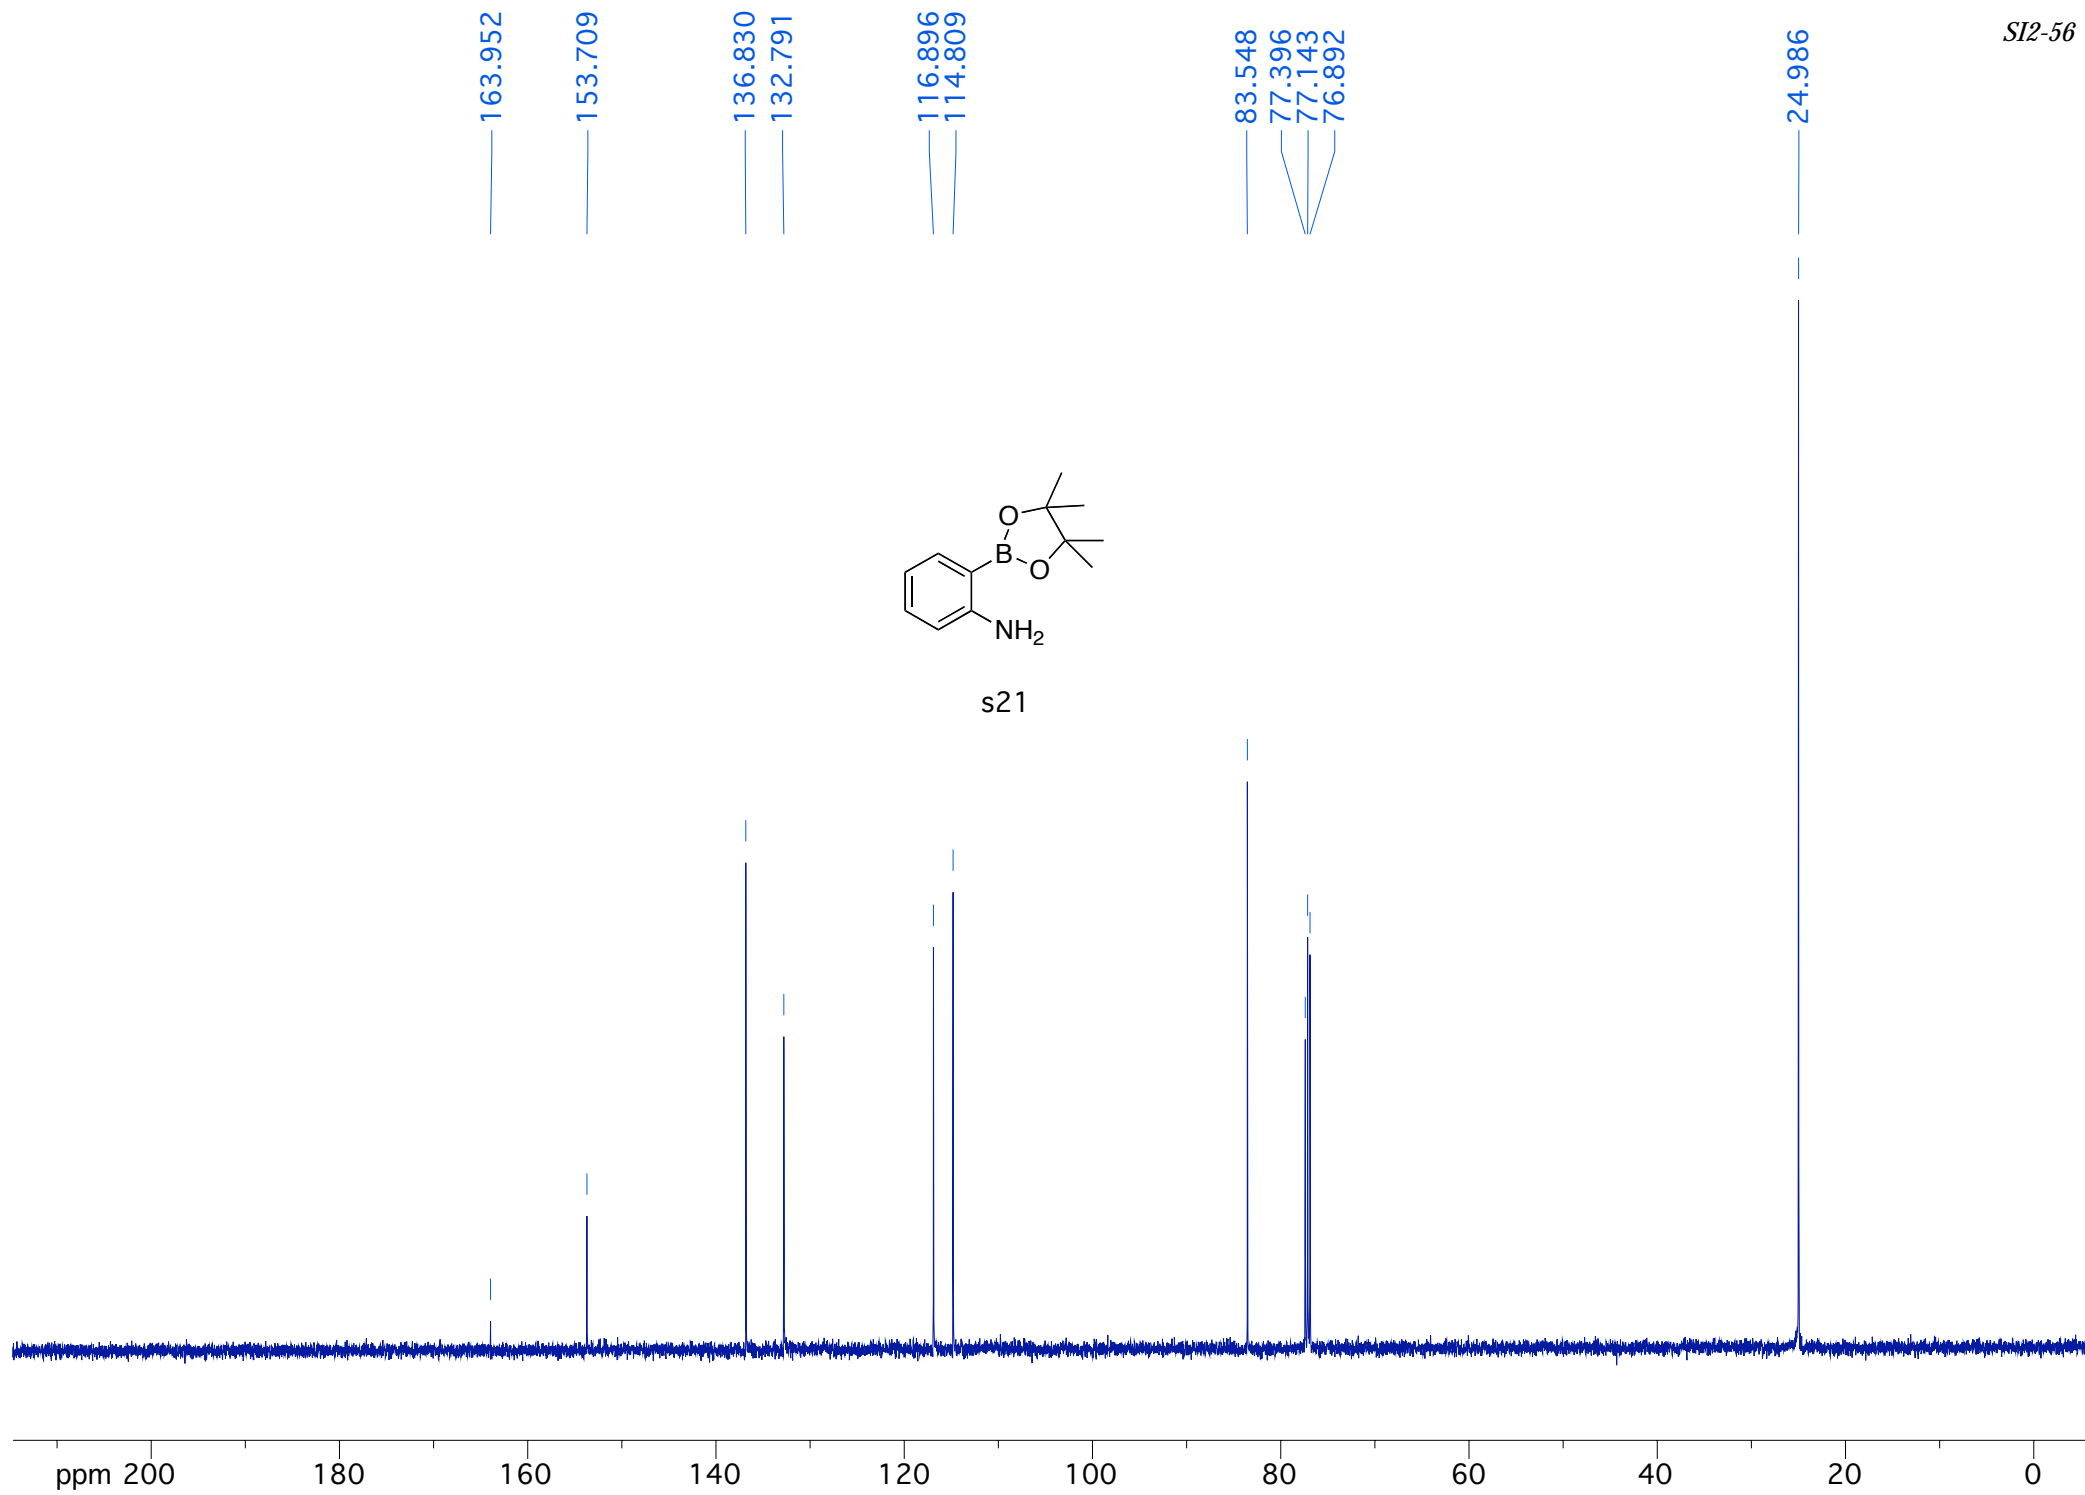



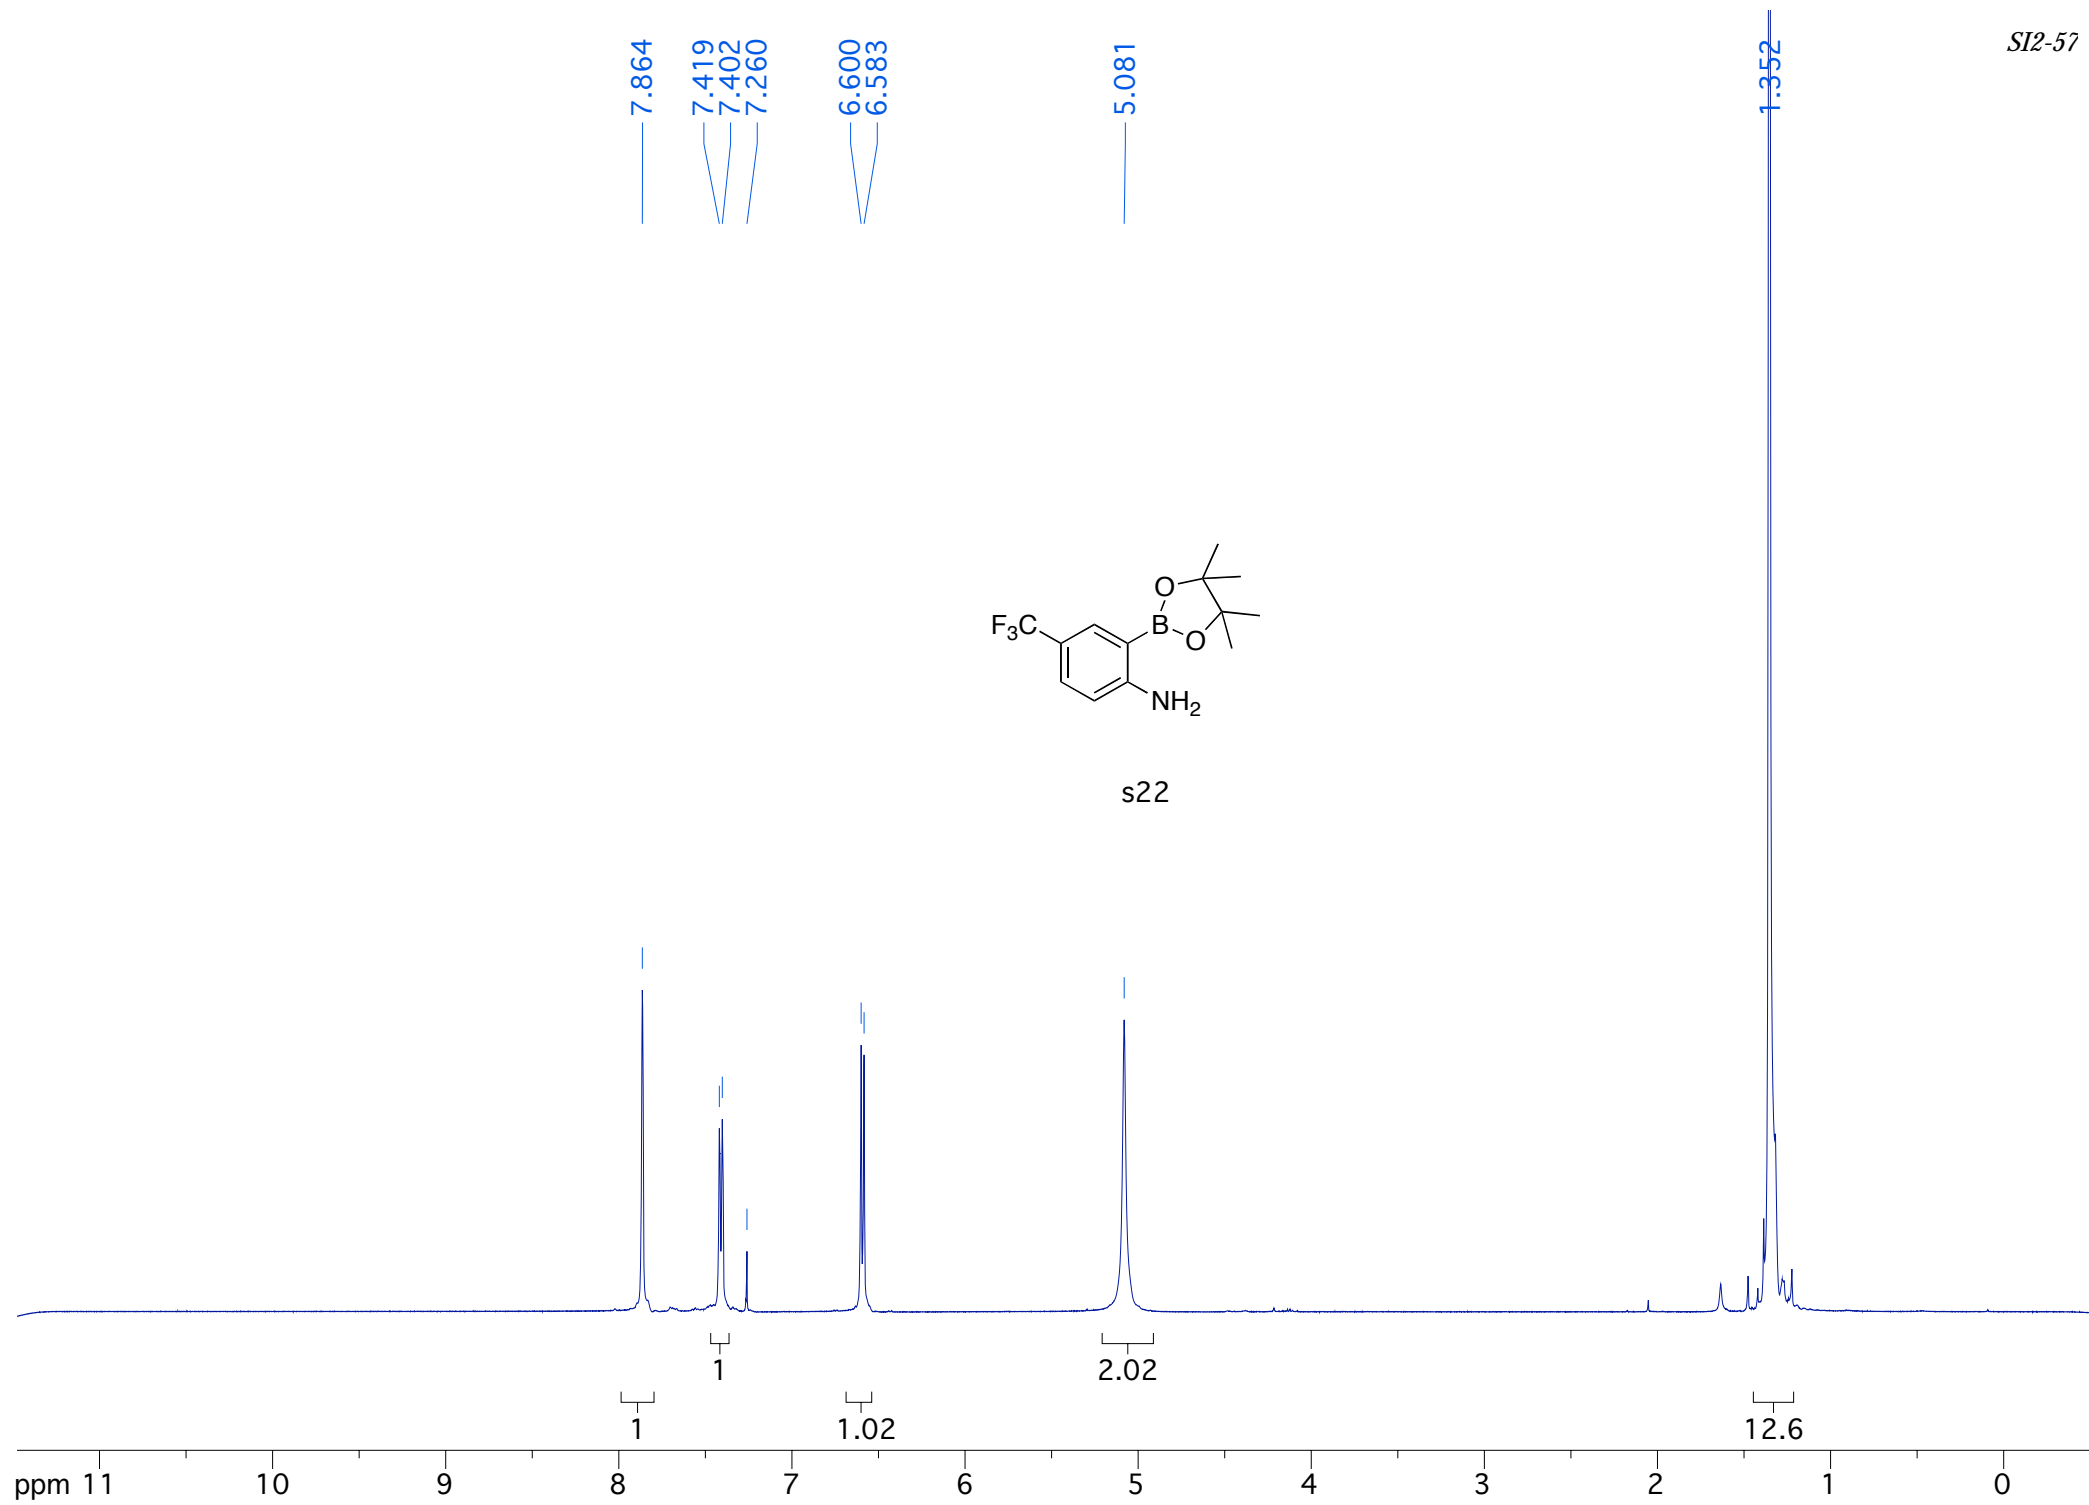

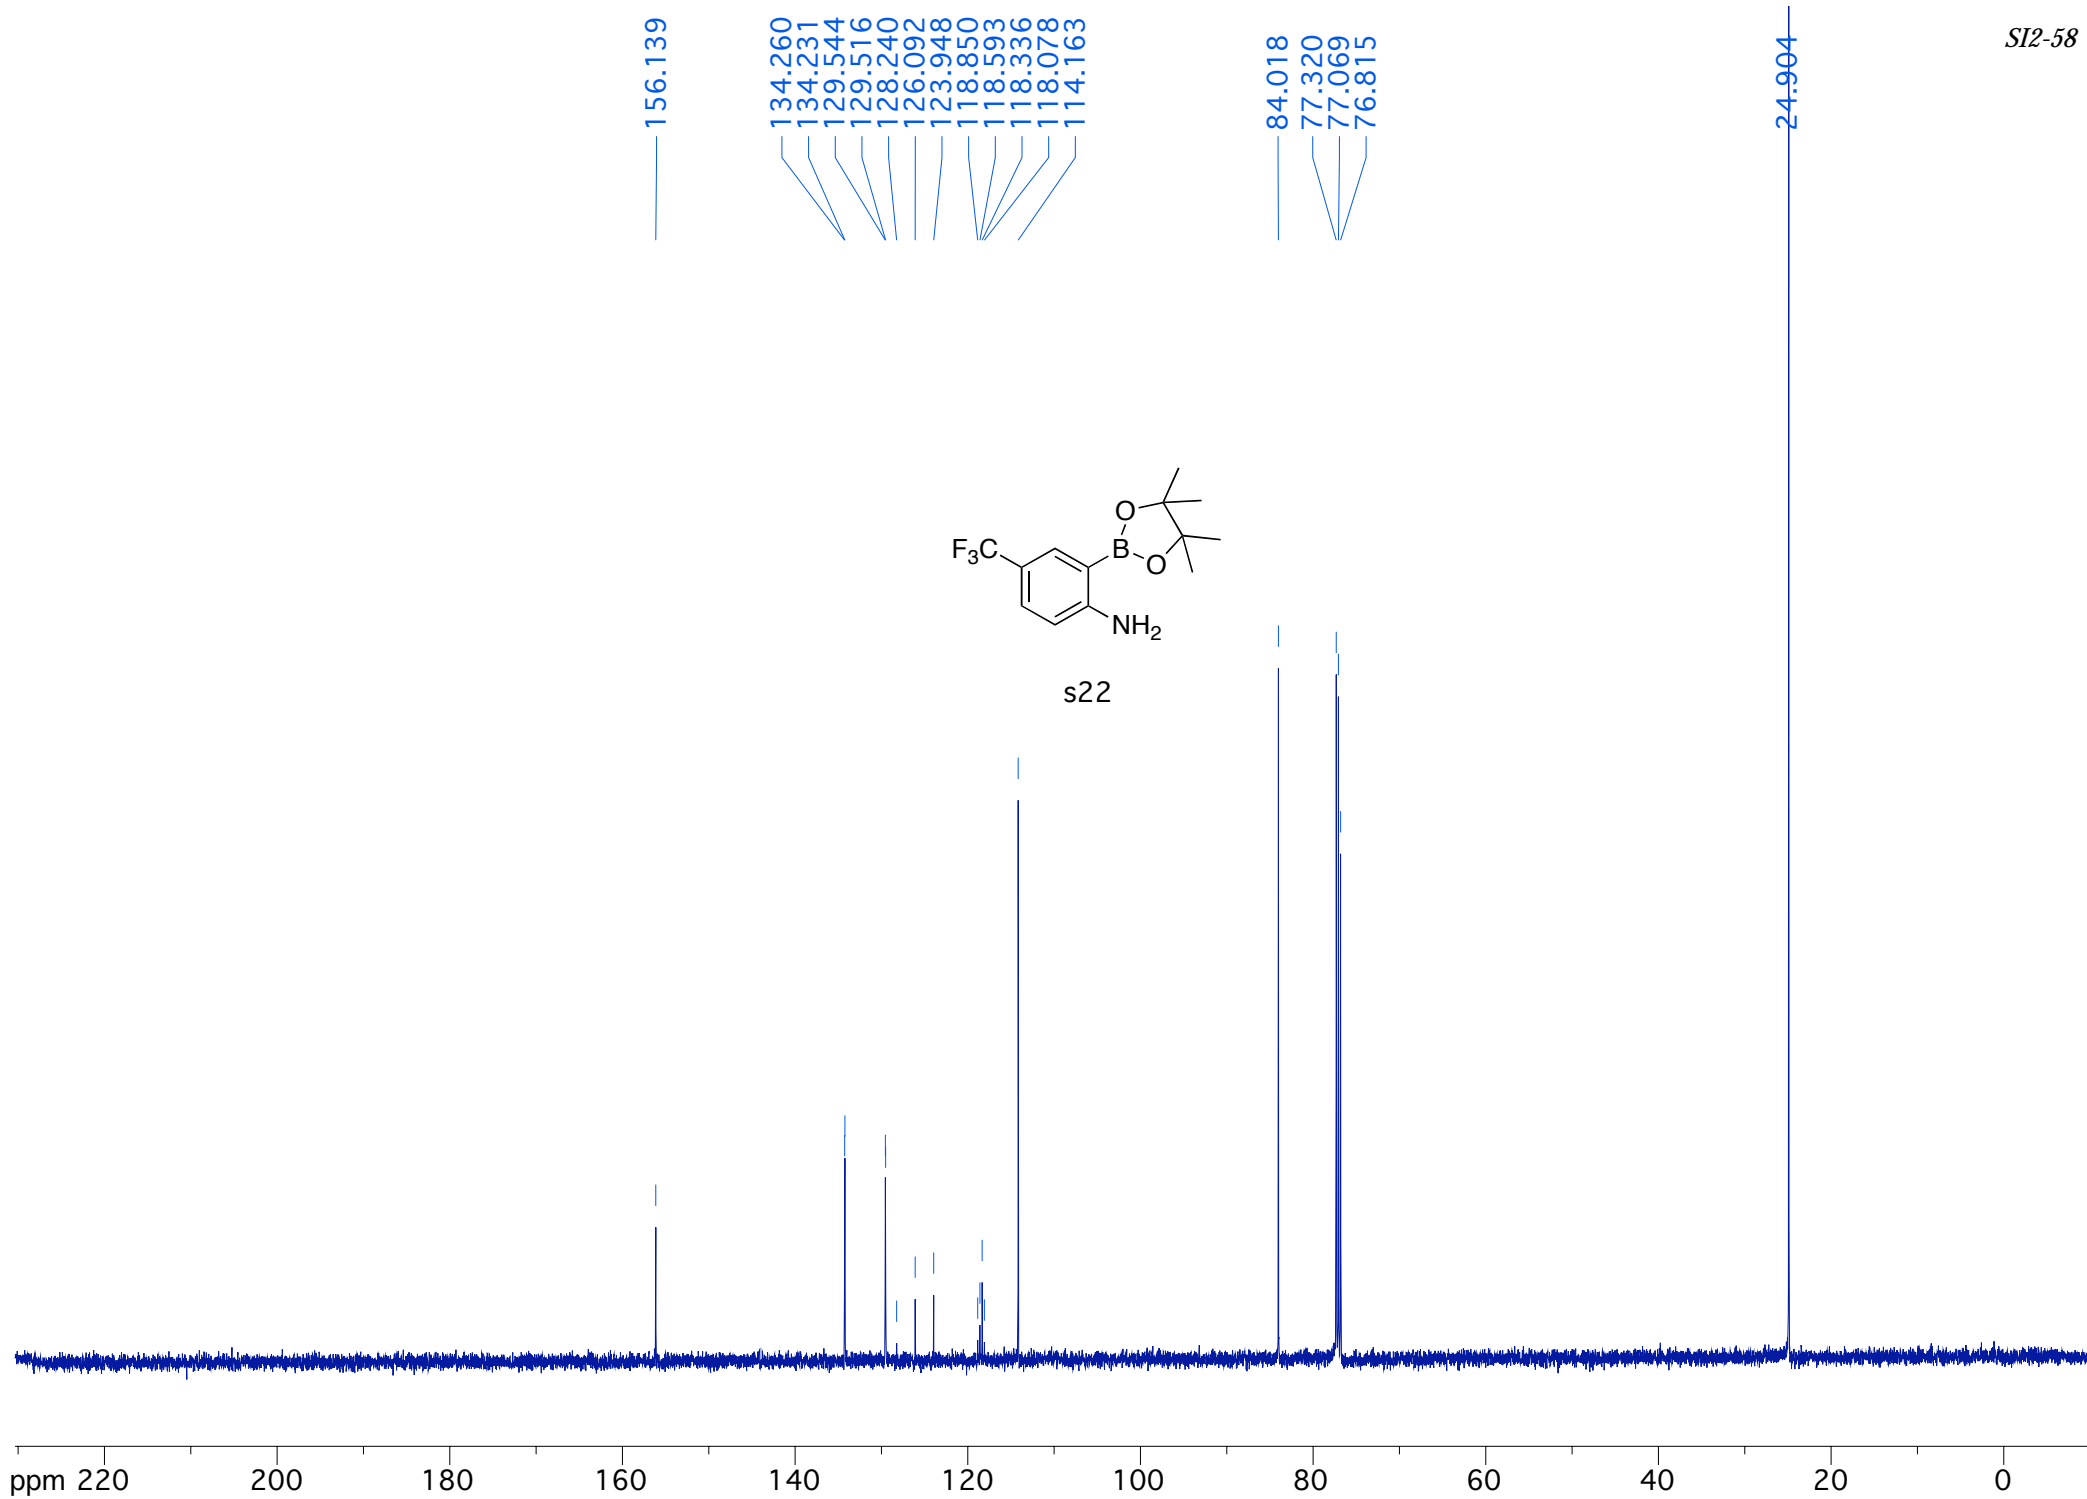

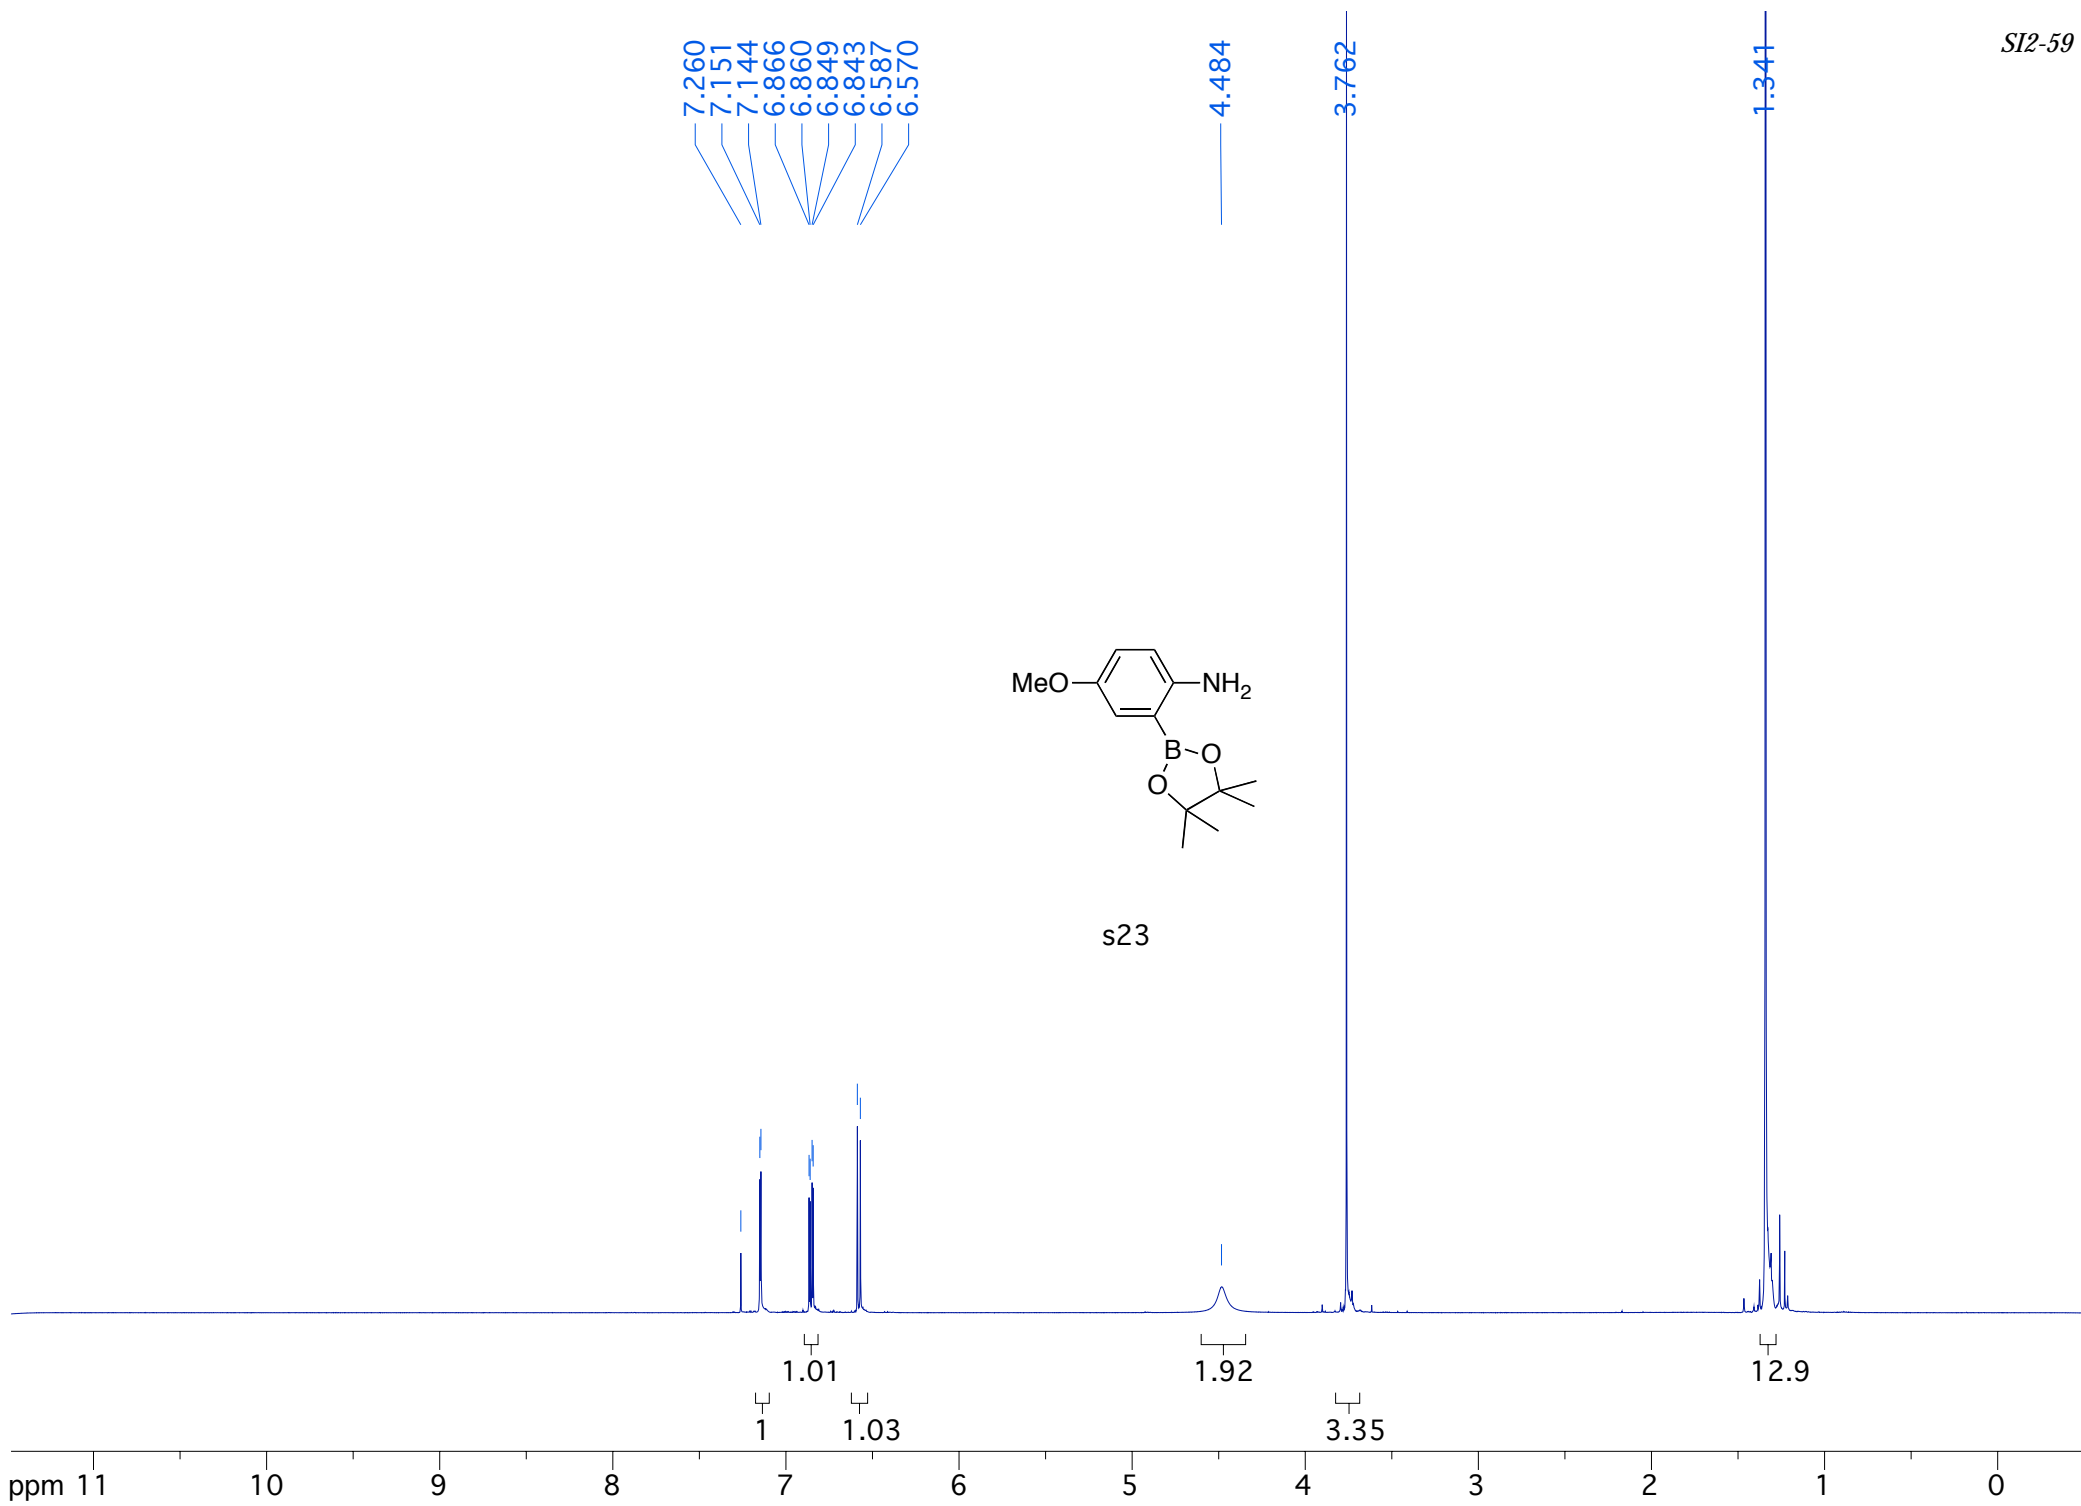

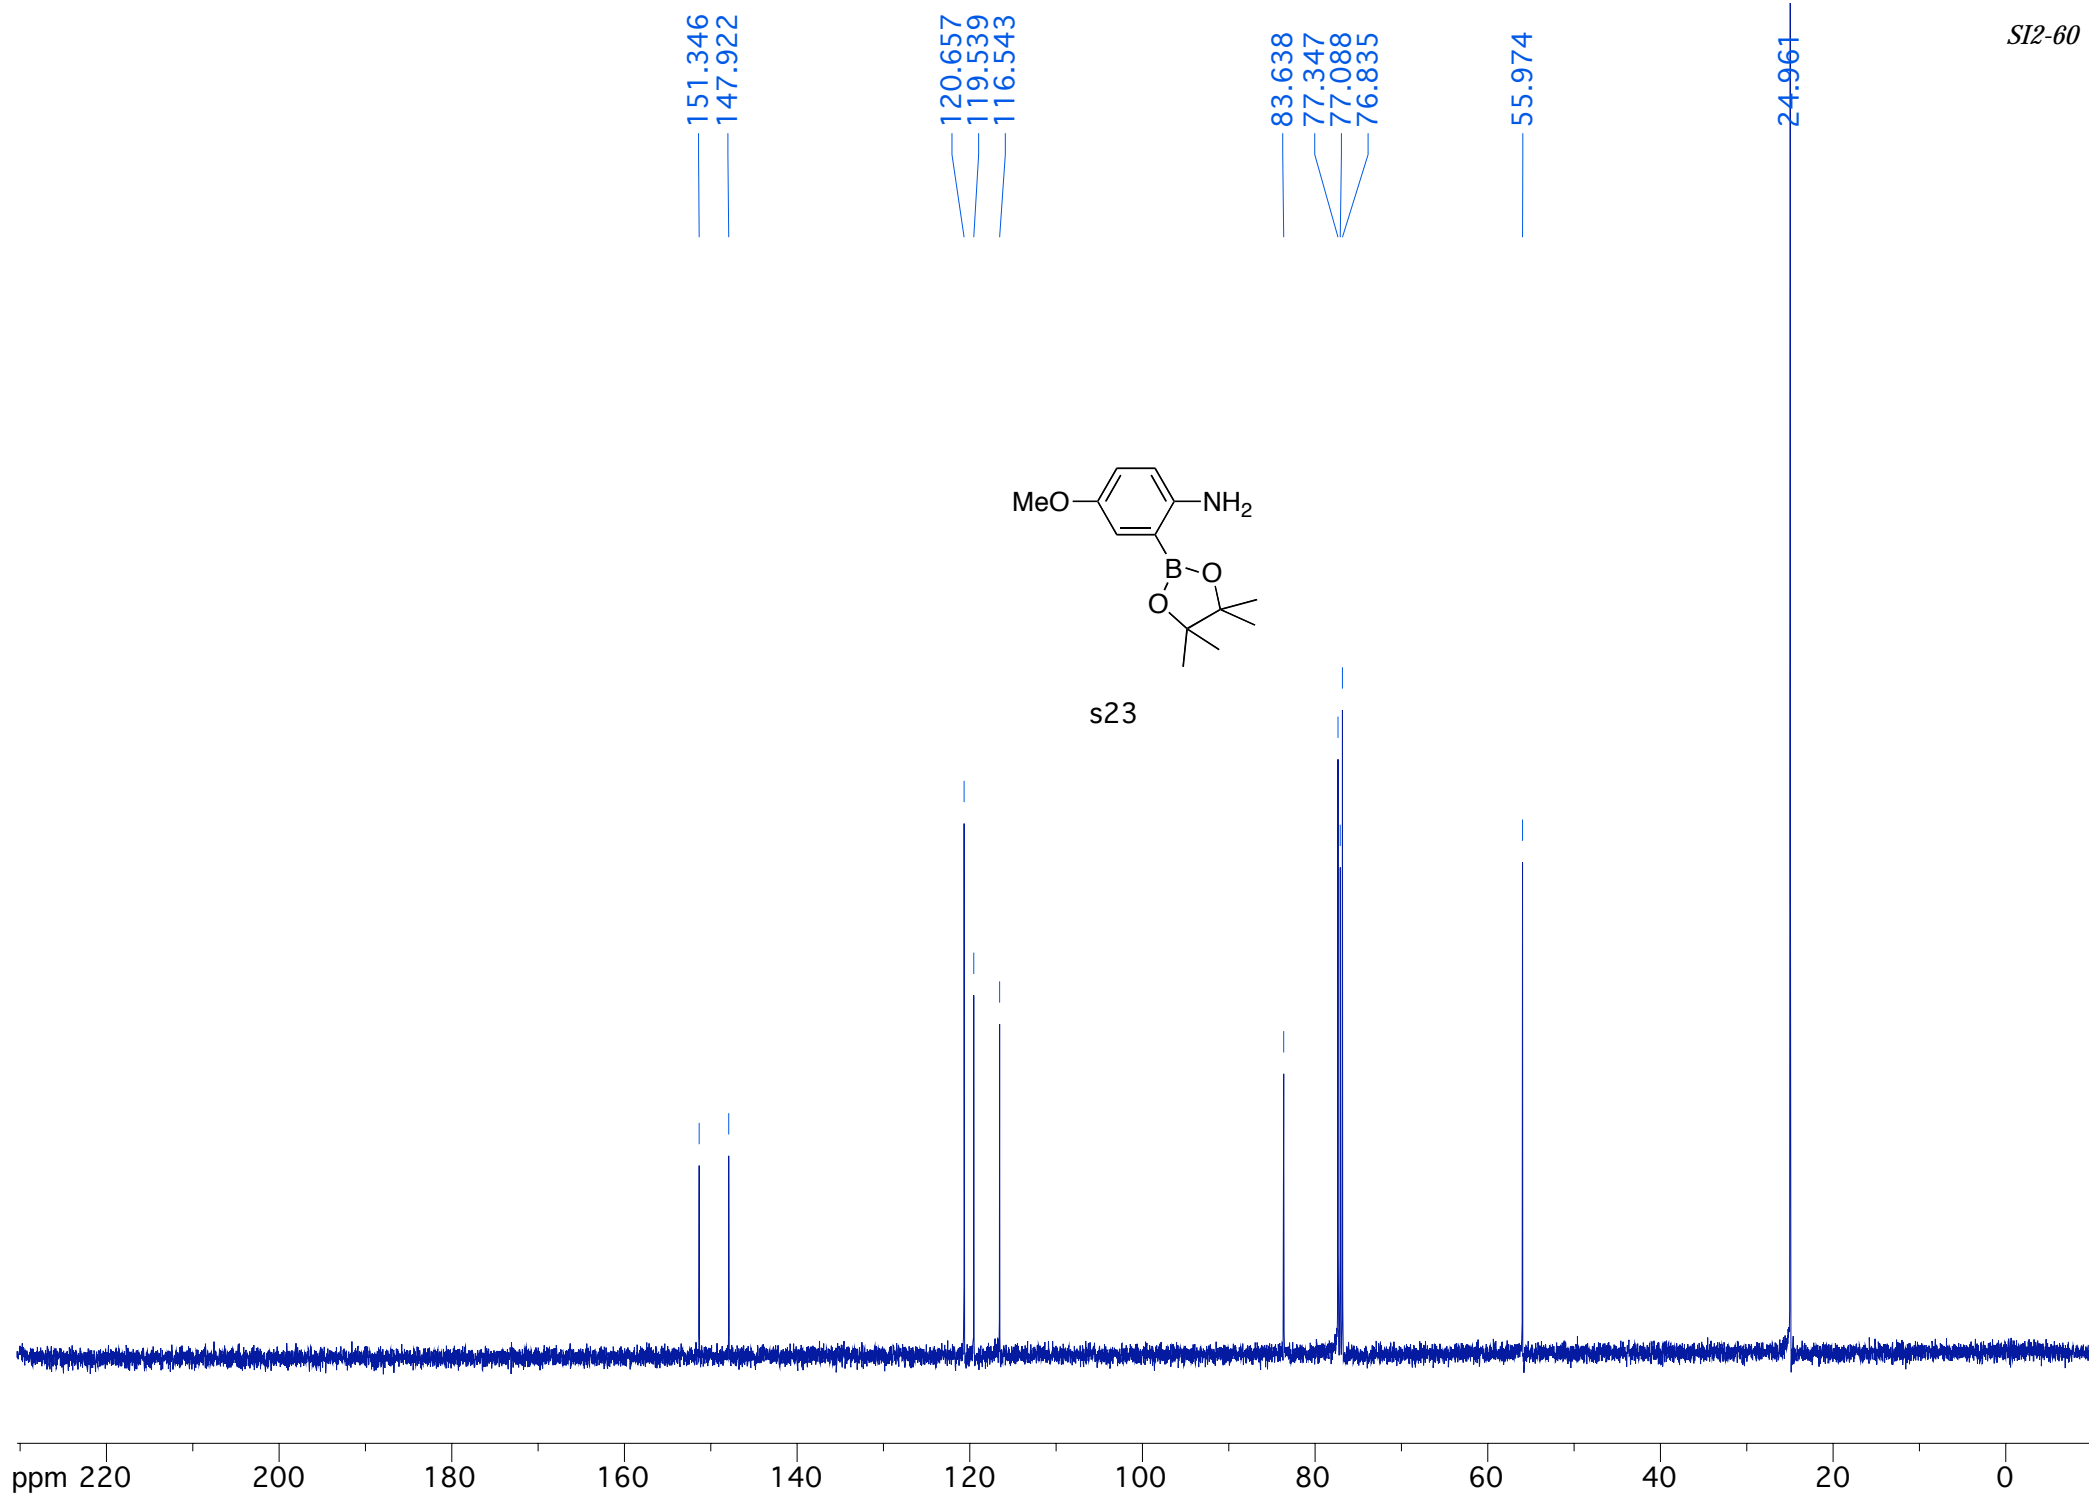

7.260  
7.106  
7.091  
7.076  
7.045  
7.030  
6.783  
6.769  
6.754  
6.730  
6.714  
6.053

3.704

2.346  
2.334  
2.322  
2.251  
2.239  
2.227  
1.702  
1.692  
1.650  
1.644  
1.639  
1.632  
1.581  
1.572

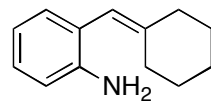

s24

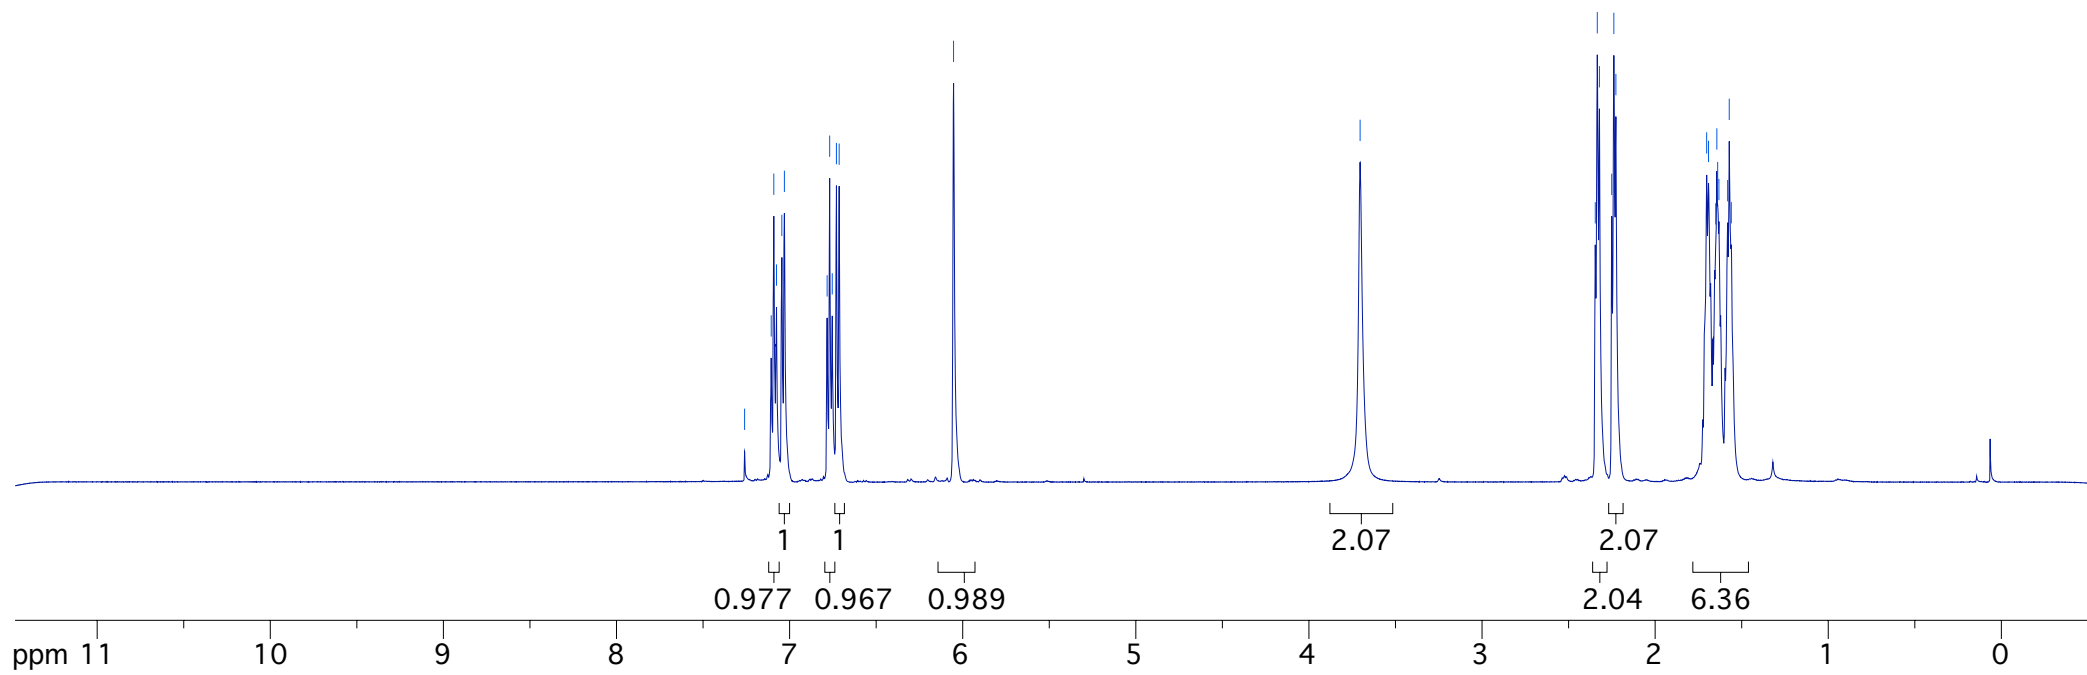

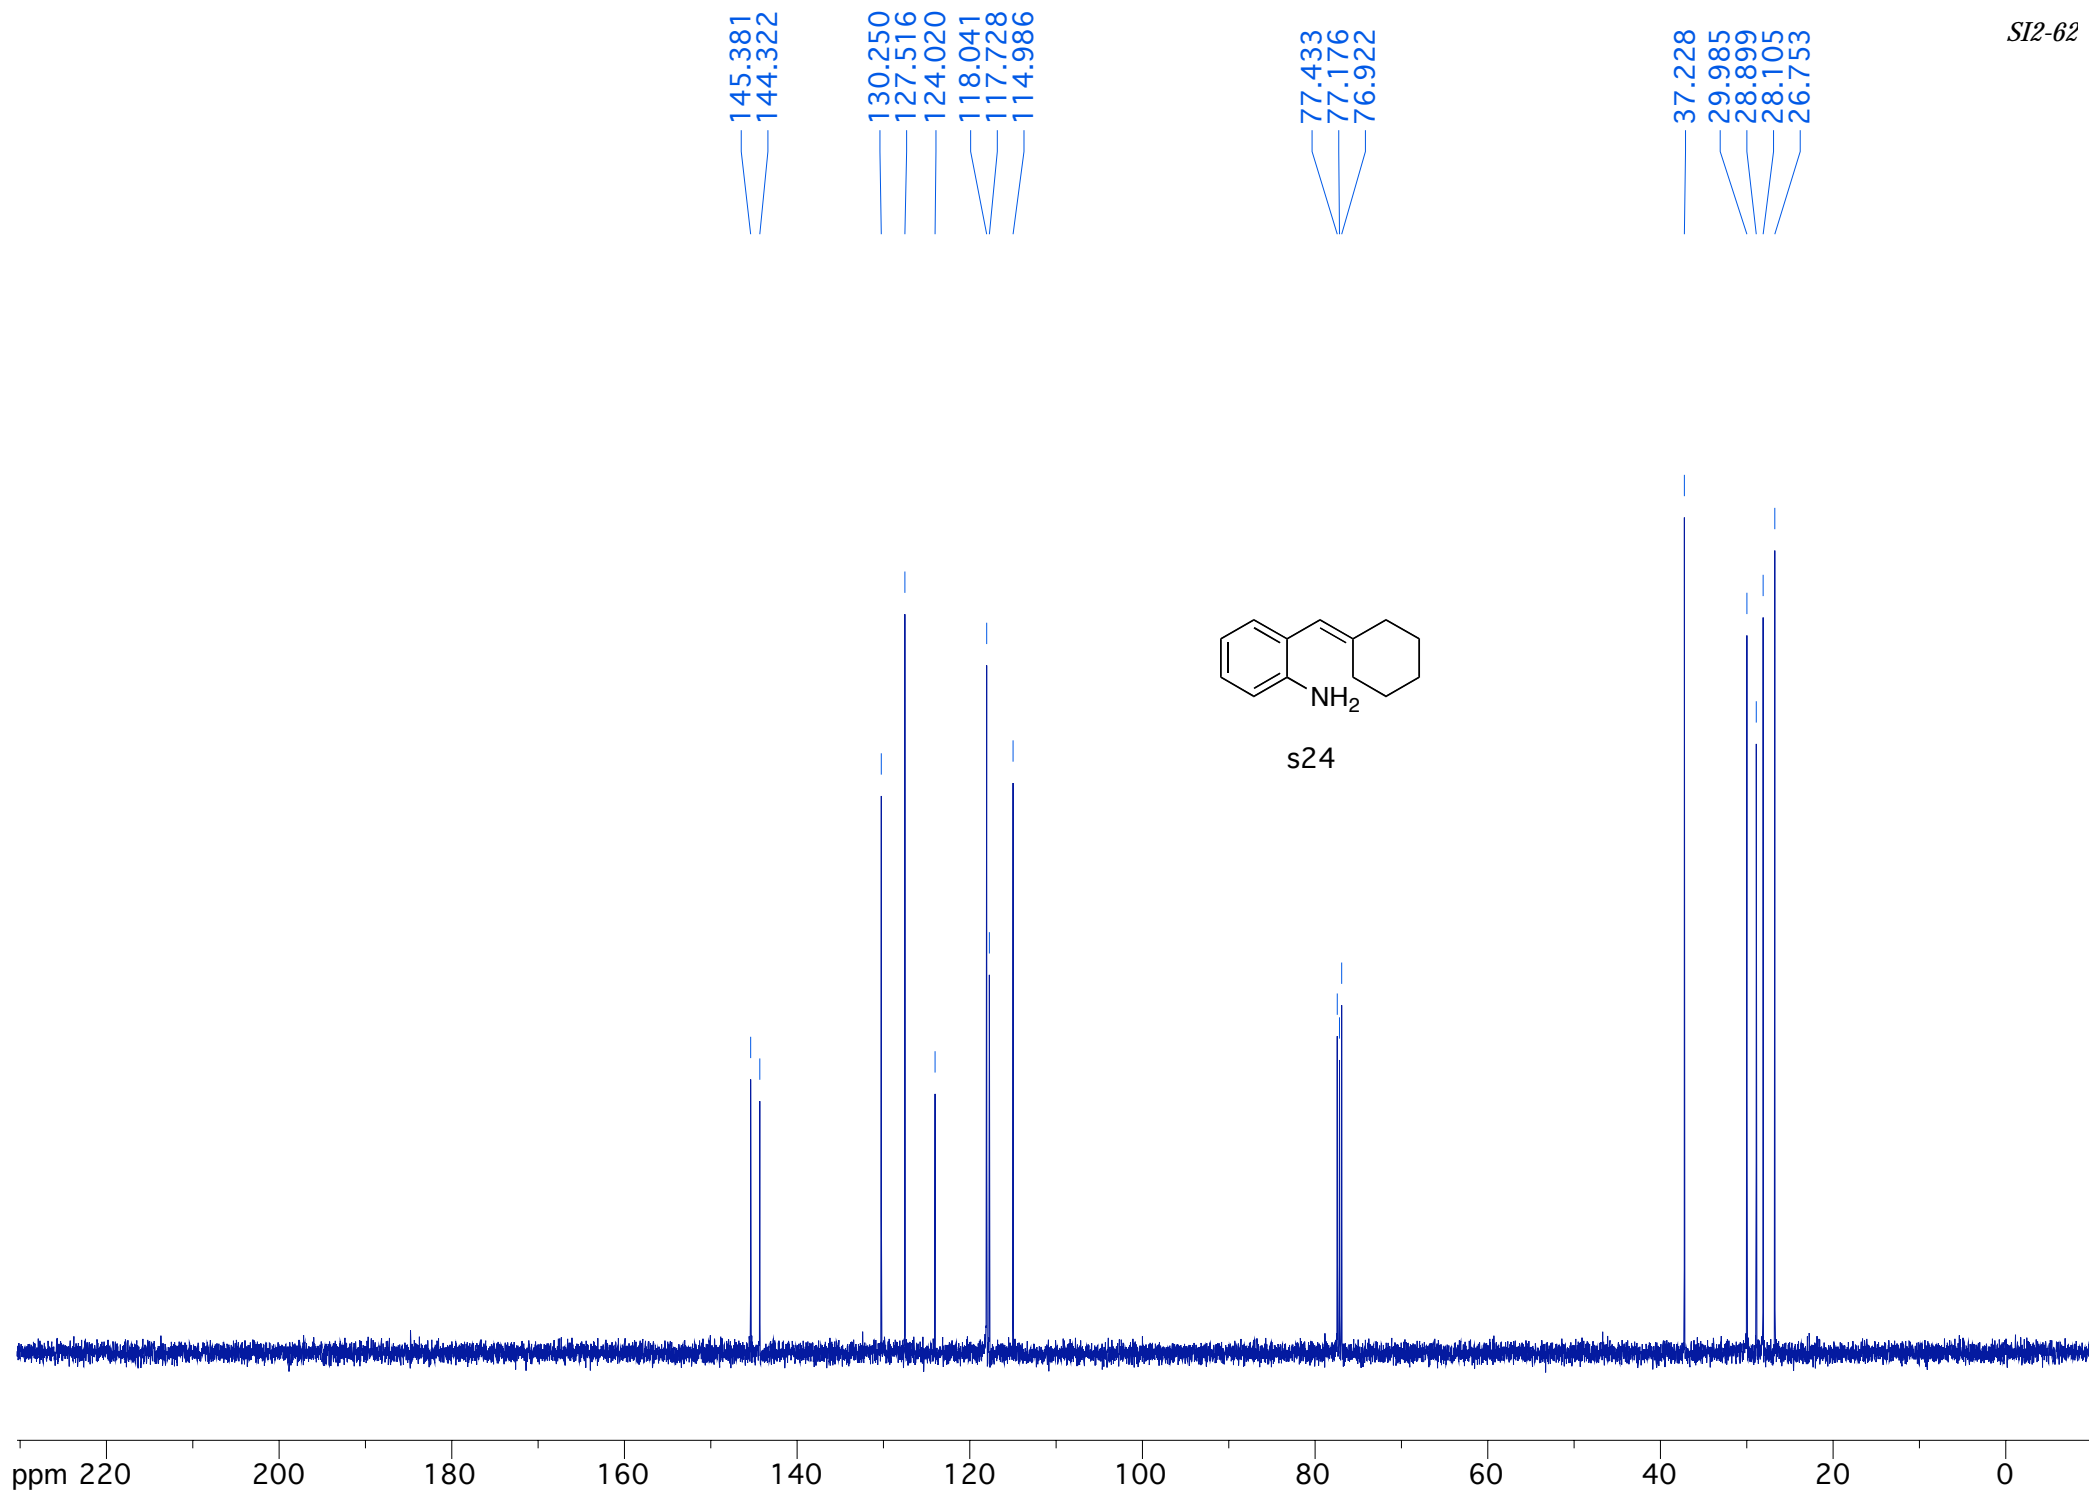

7.260  
7.163  
7.148  
7.064  
7.061  
7.046  
7.034  
7.031  
6.774  
6.759  
6.744  
6.705  
6.690  
6.229

3.686

2.494  
2.390  
1.732  
1.724  
1.718  
1.714  
1.709  
1.703

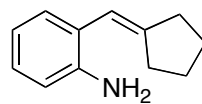

s25

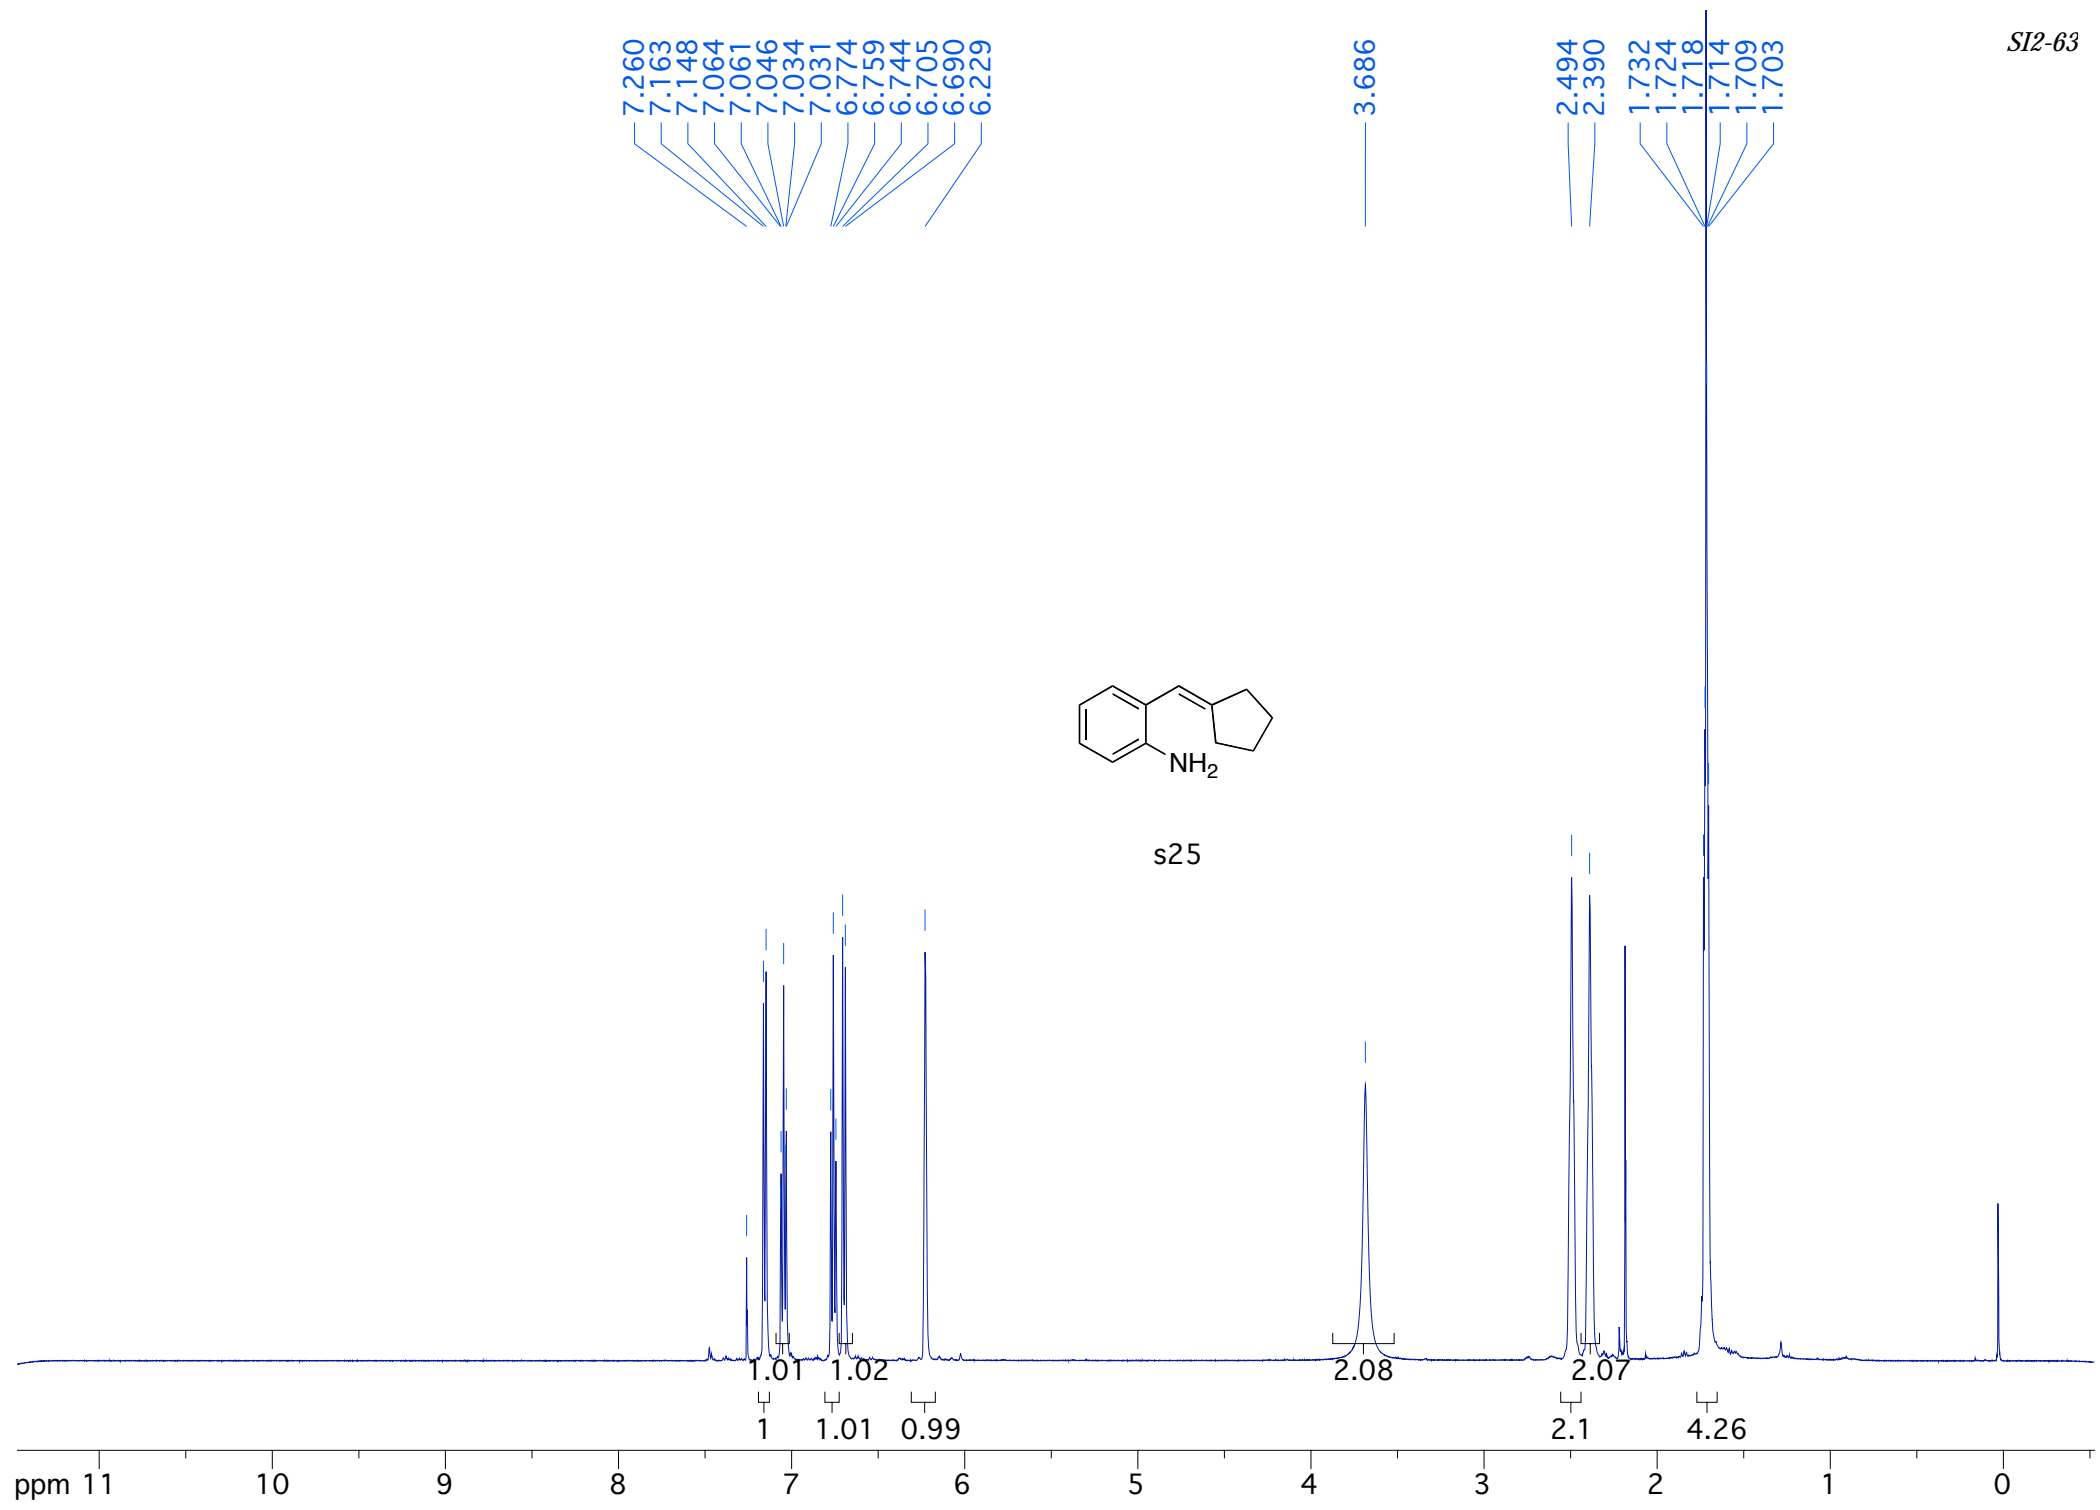

ppm 11 10 9 8 7 6 5 4 3 2 1 0

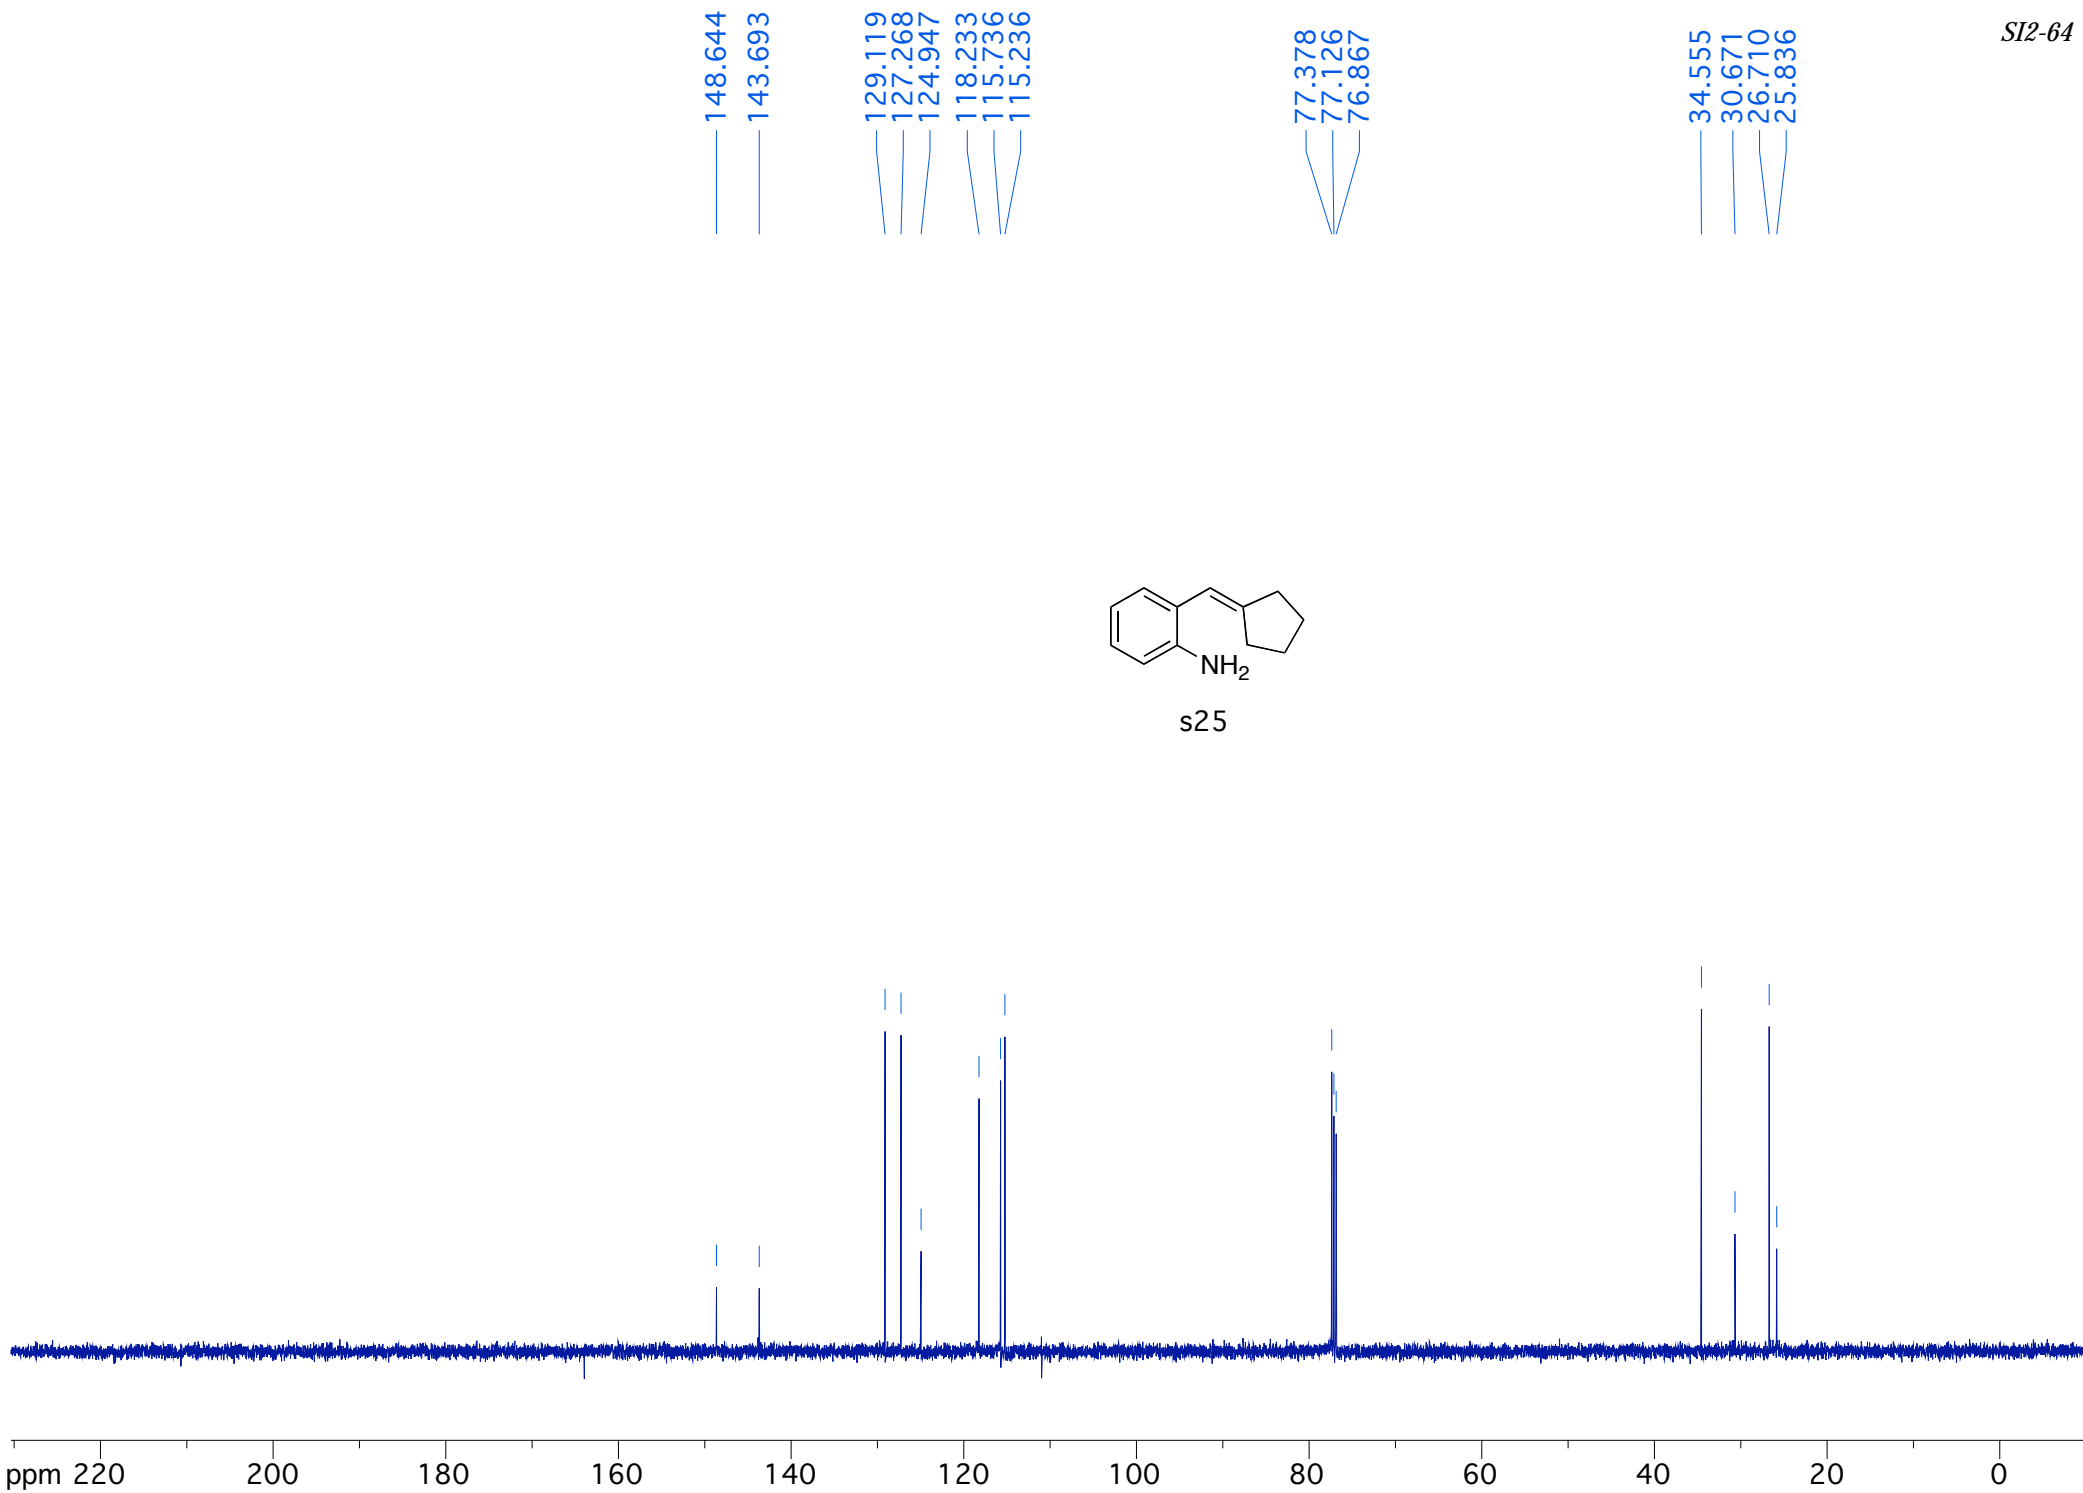



7.260  
7.081  
7.078  
7.067  
7.063  
7.051  
7.048  
7.037  
7.022  
7.020  
6.760  
6.758  
6.745  
6.743  
6.730  
6.728  
6.713  
6.710  
6.697  
6.695  
6.097  
3.678  
2.451  
2.449  
2.438  
2.428  
2.425  
2.333  
2.322  
2.311  
2.309  
1.722  
1.711  
1.705  
1.699  
1.692  
1.687  
1.682  
1.675  
1.625  
1.621  
1.614  
1.610  
1.604  
1.600  
1.598  
1.590  
1.581  
1.575  
1.572  
1.571  
1.566  
1.557  
1.553  
1.548  
1.542  
1.538  
1.533  
1.527  
1.522

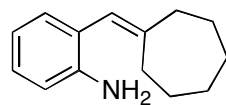

s26

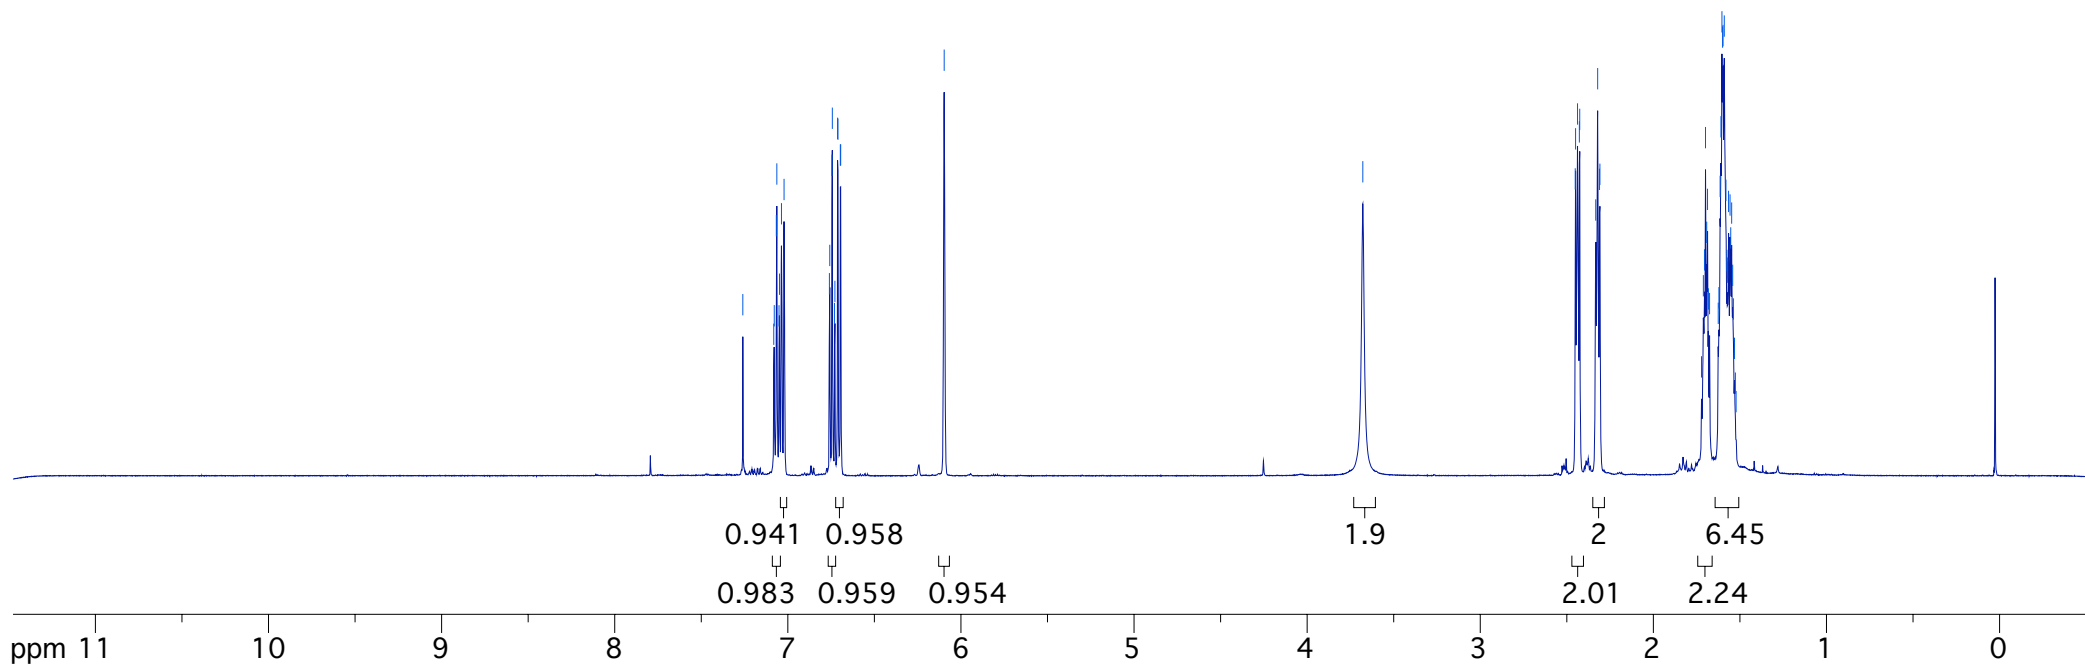

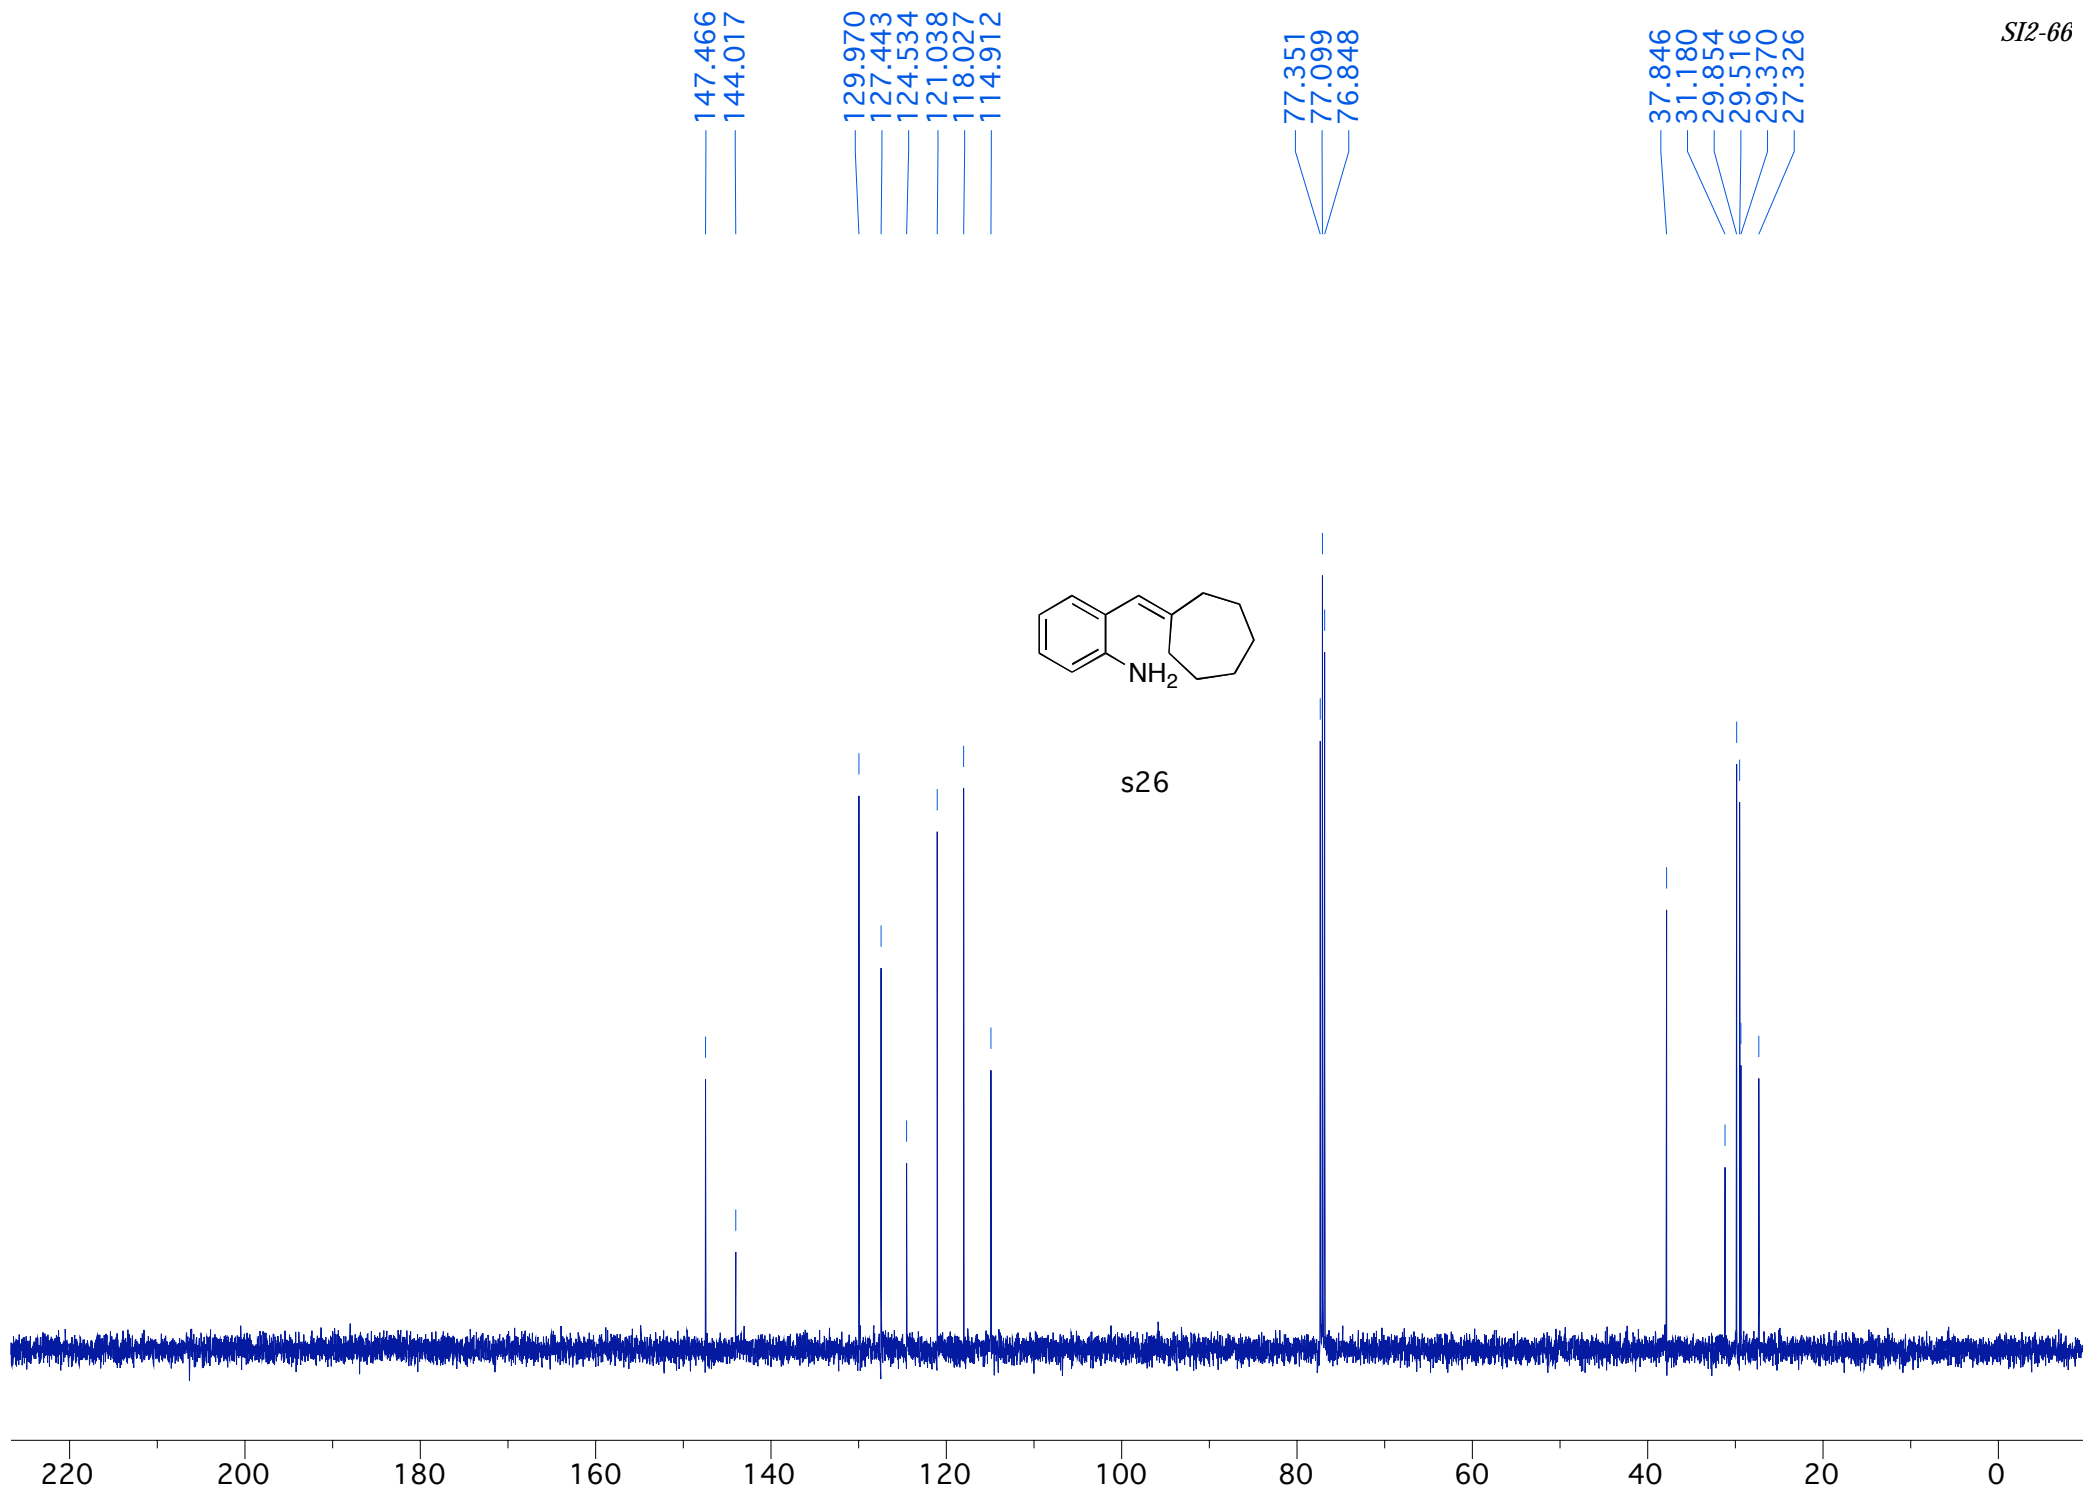

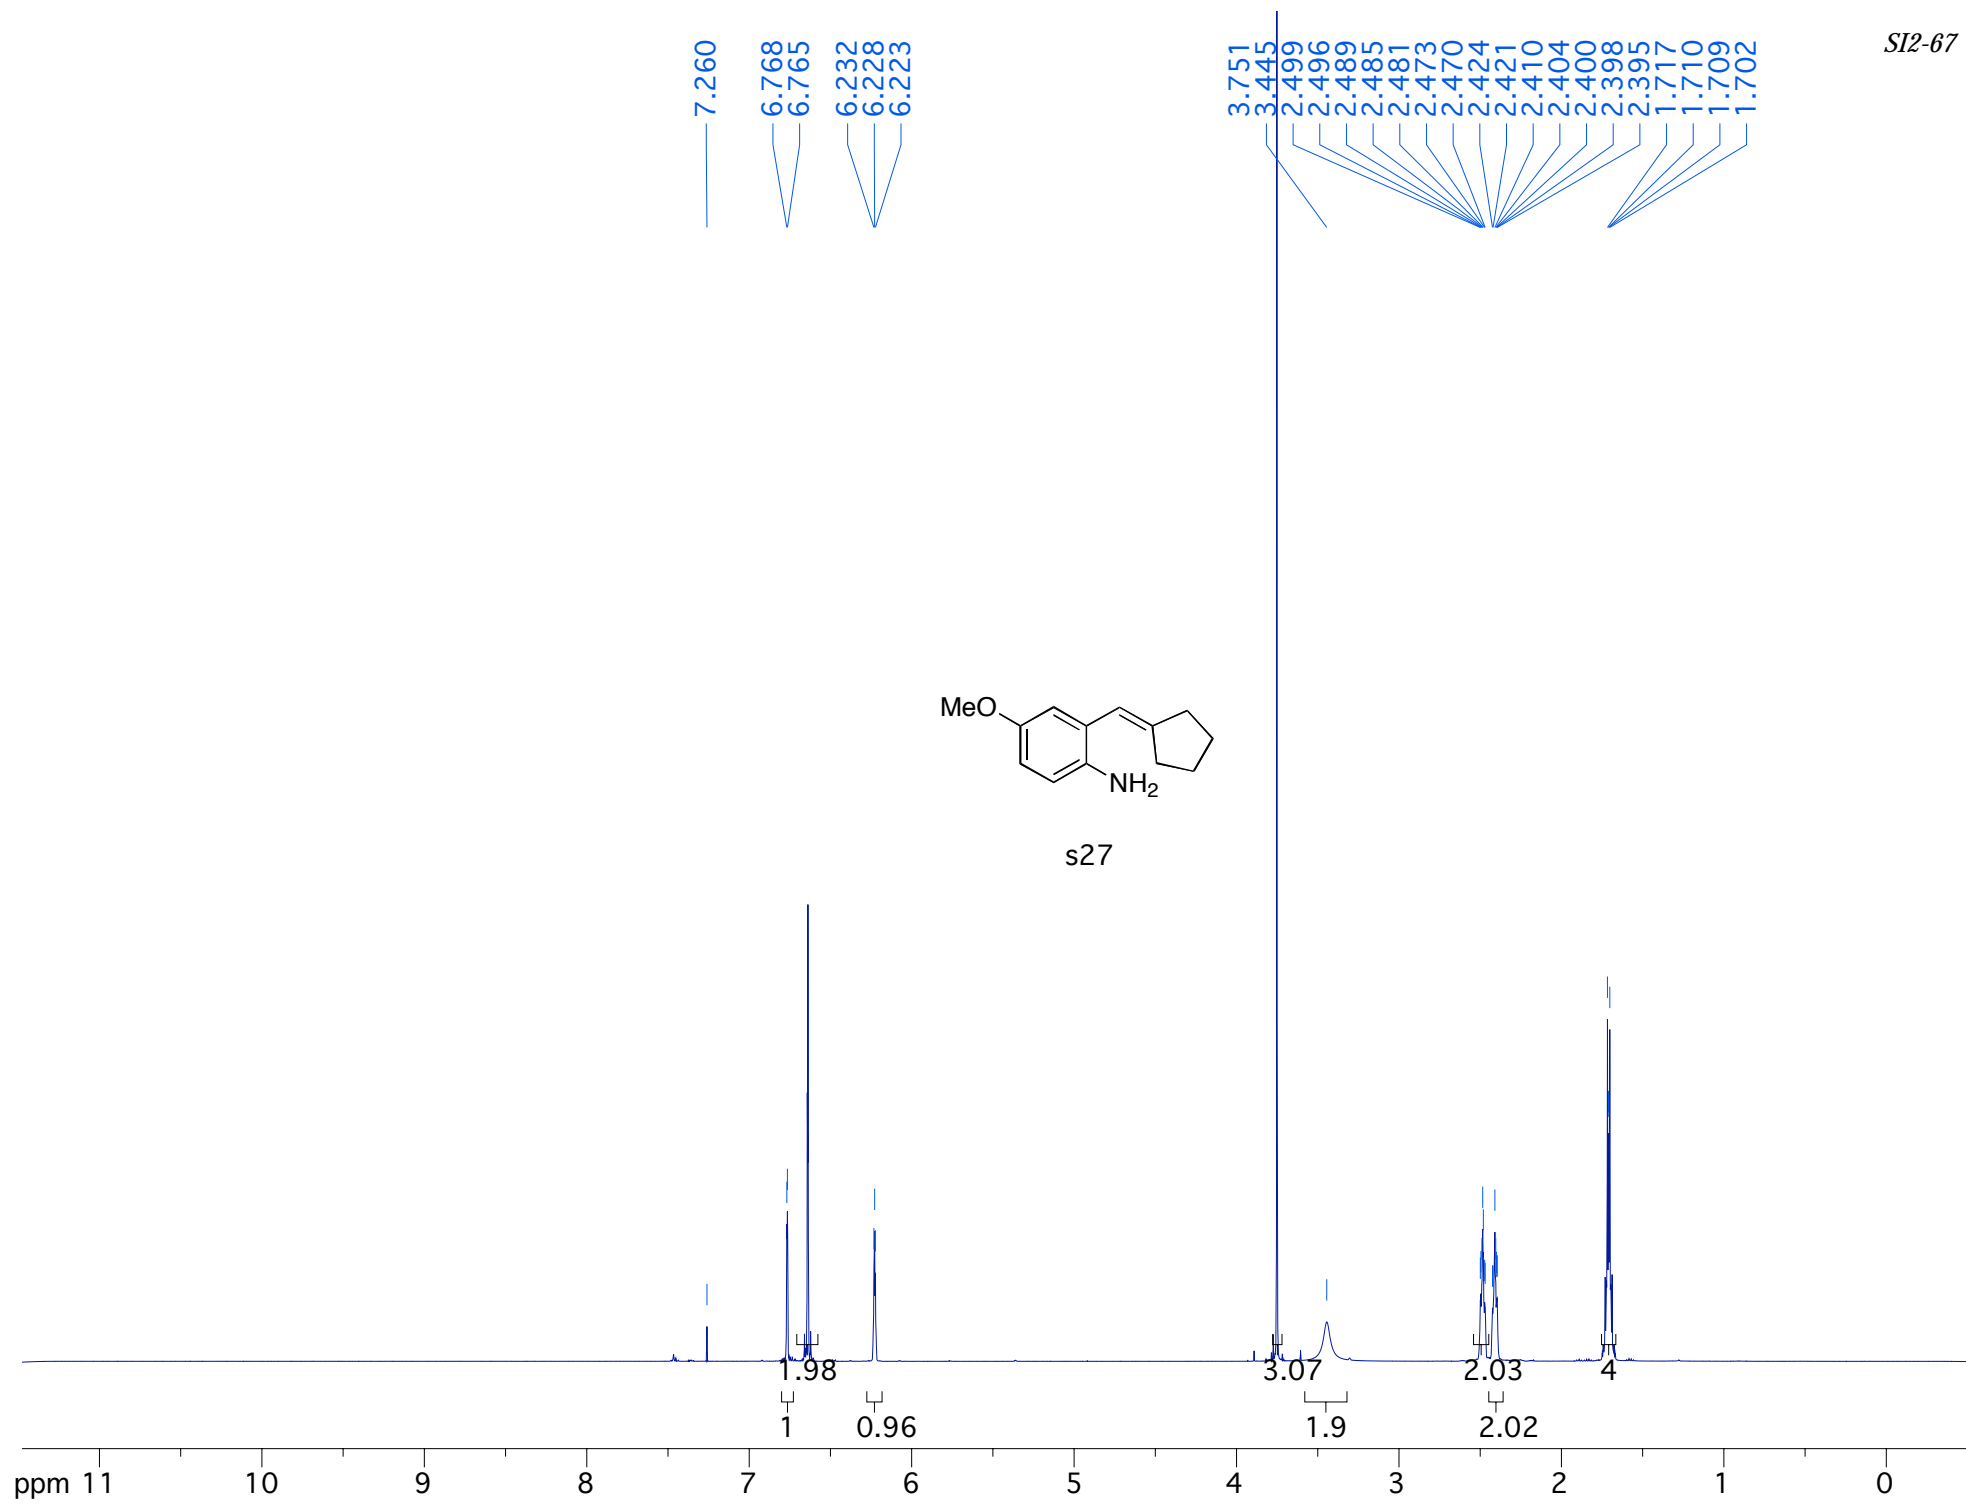

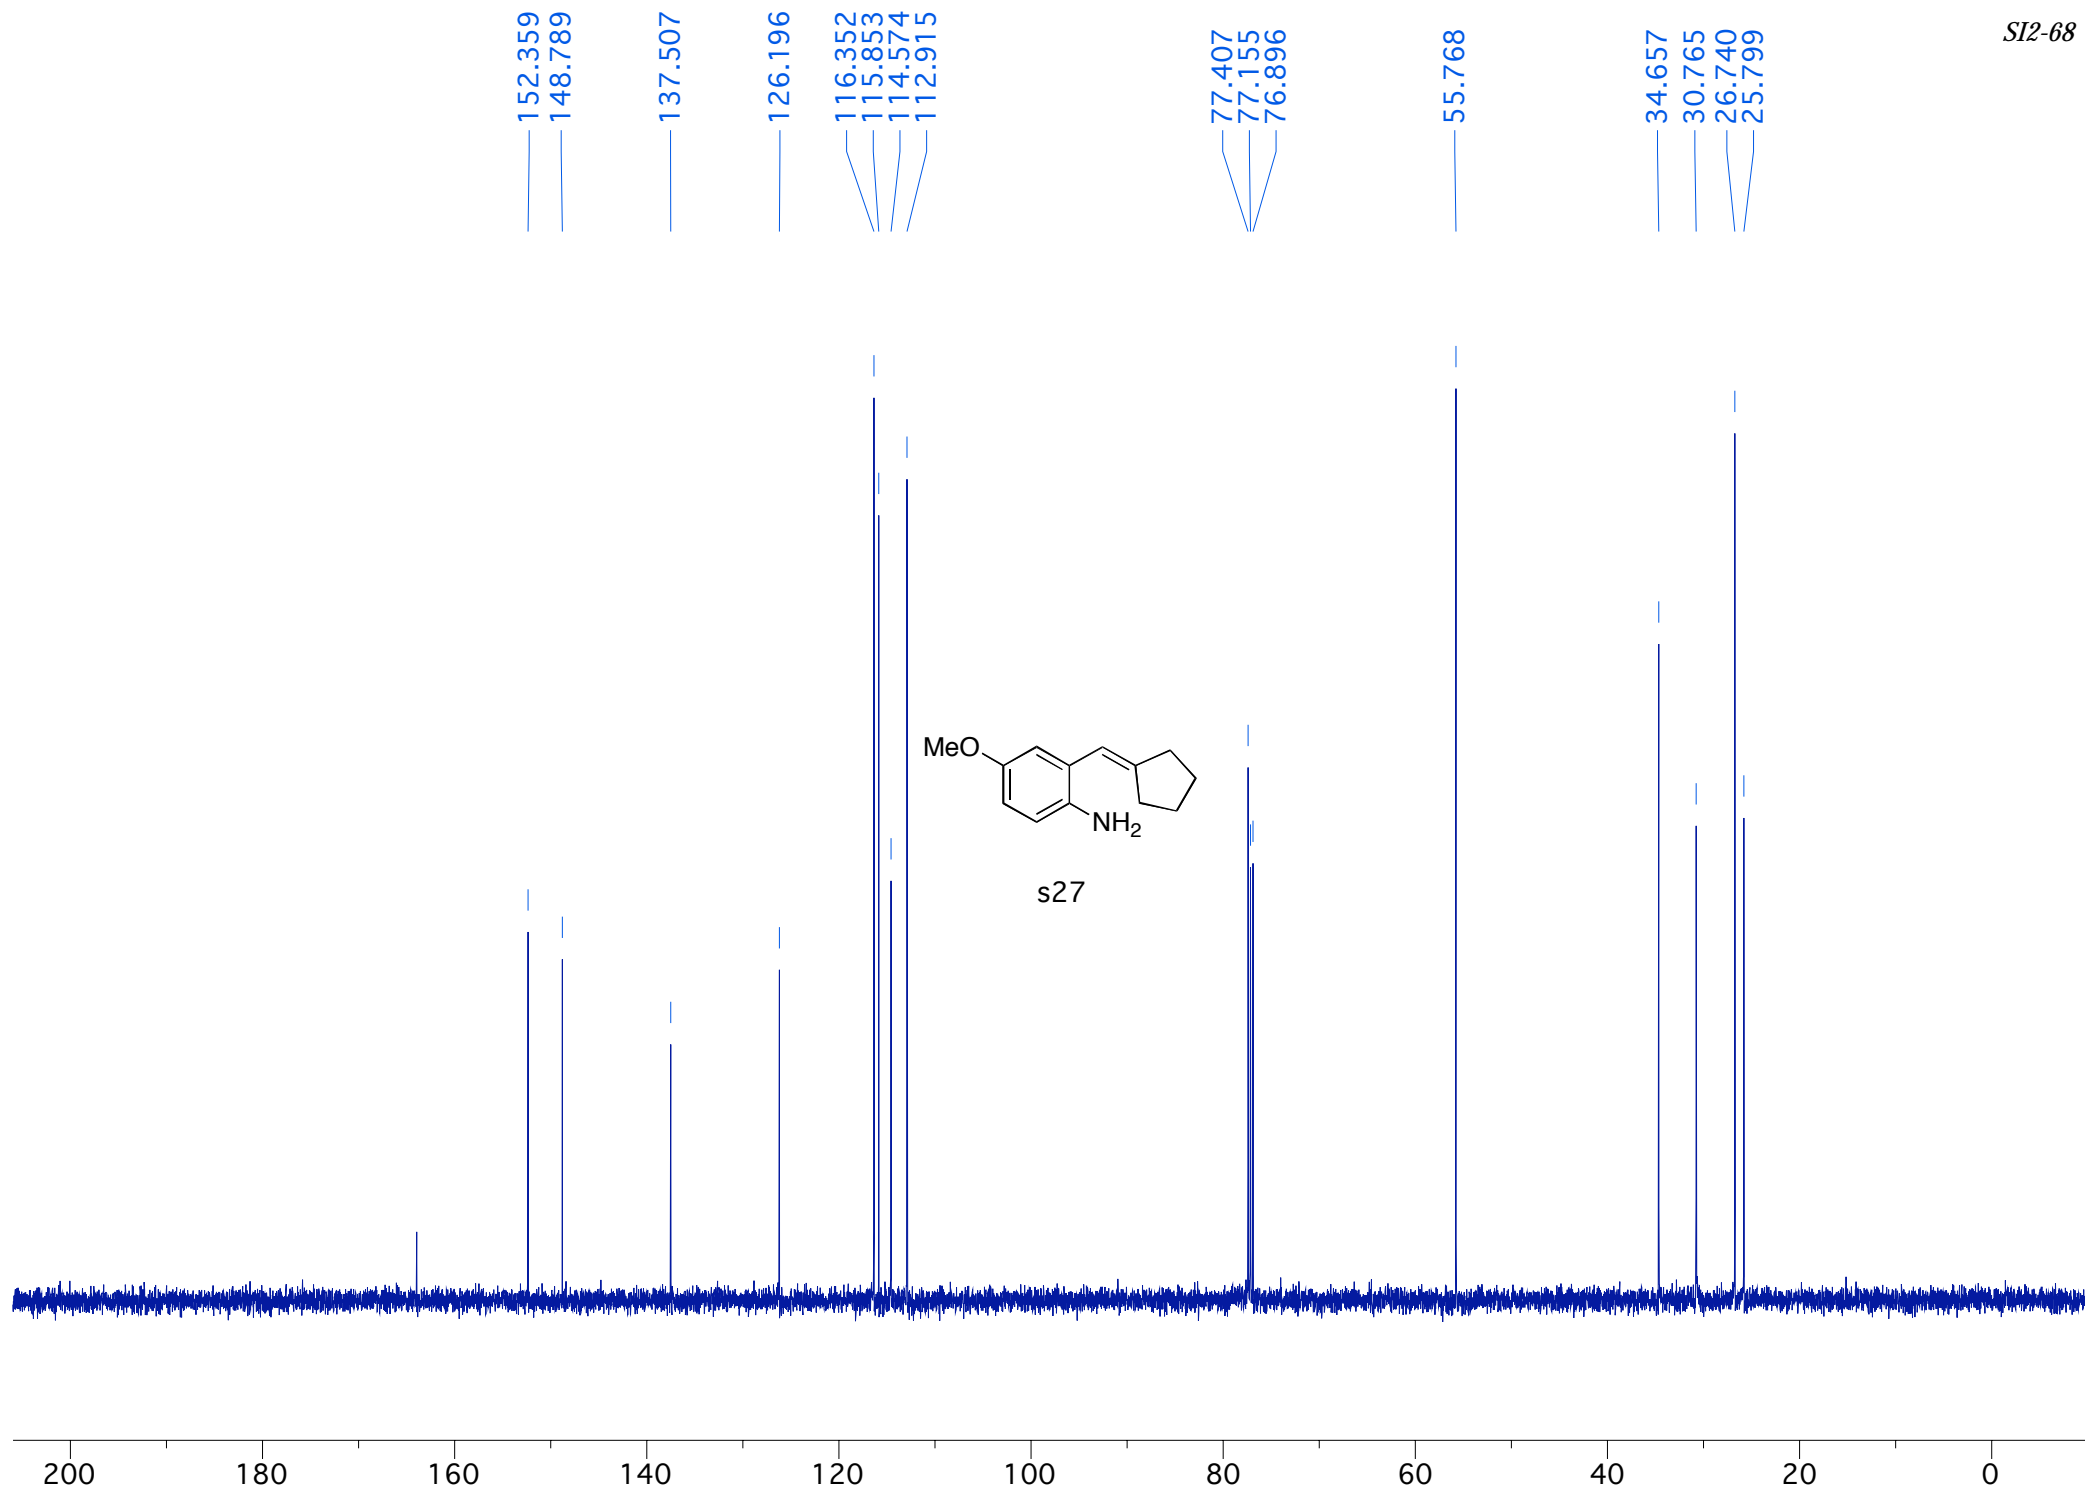

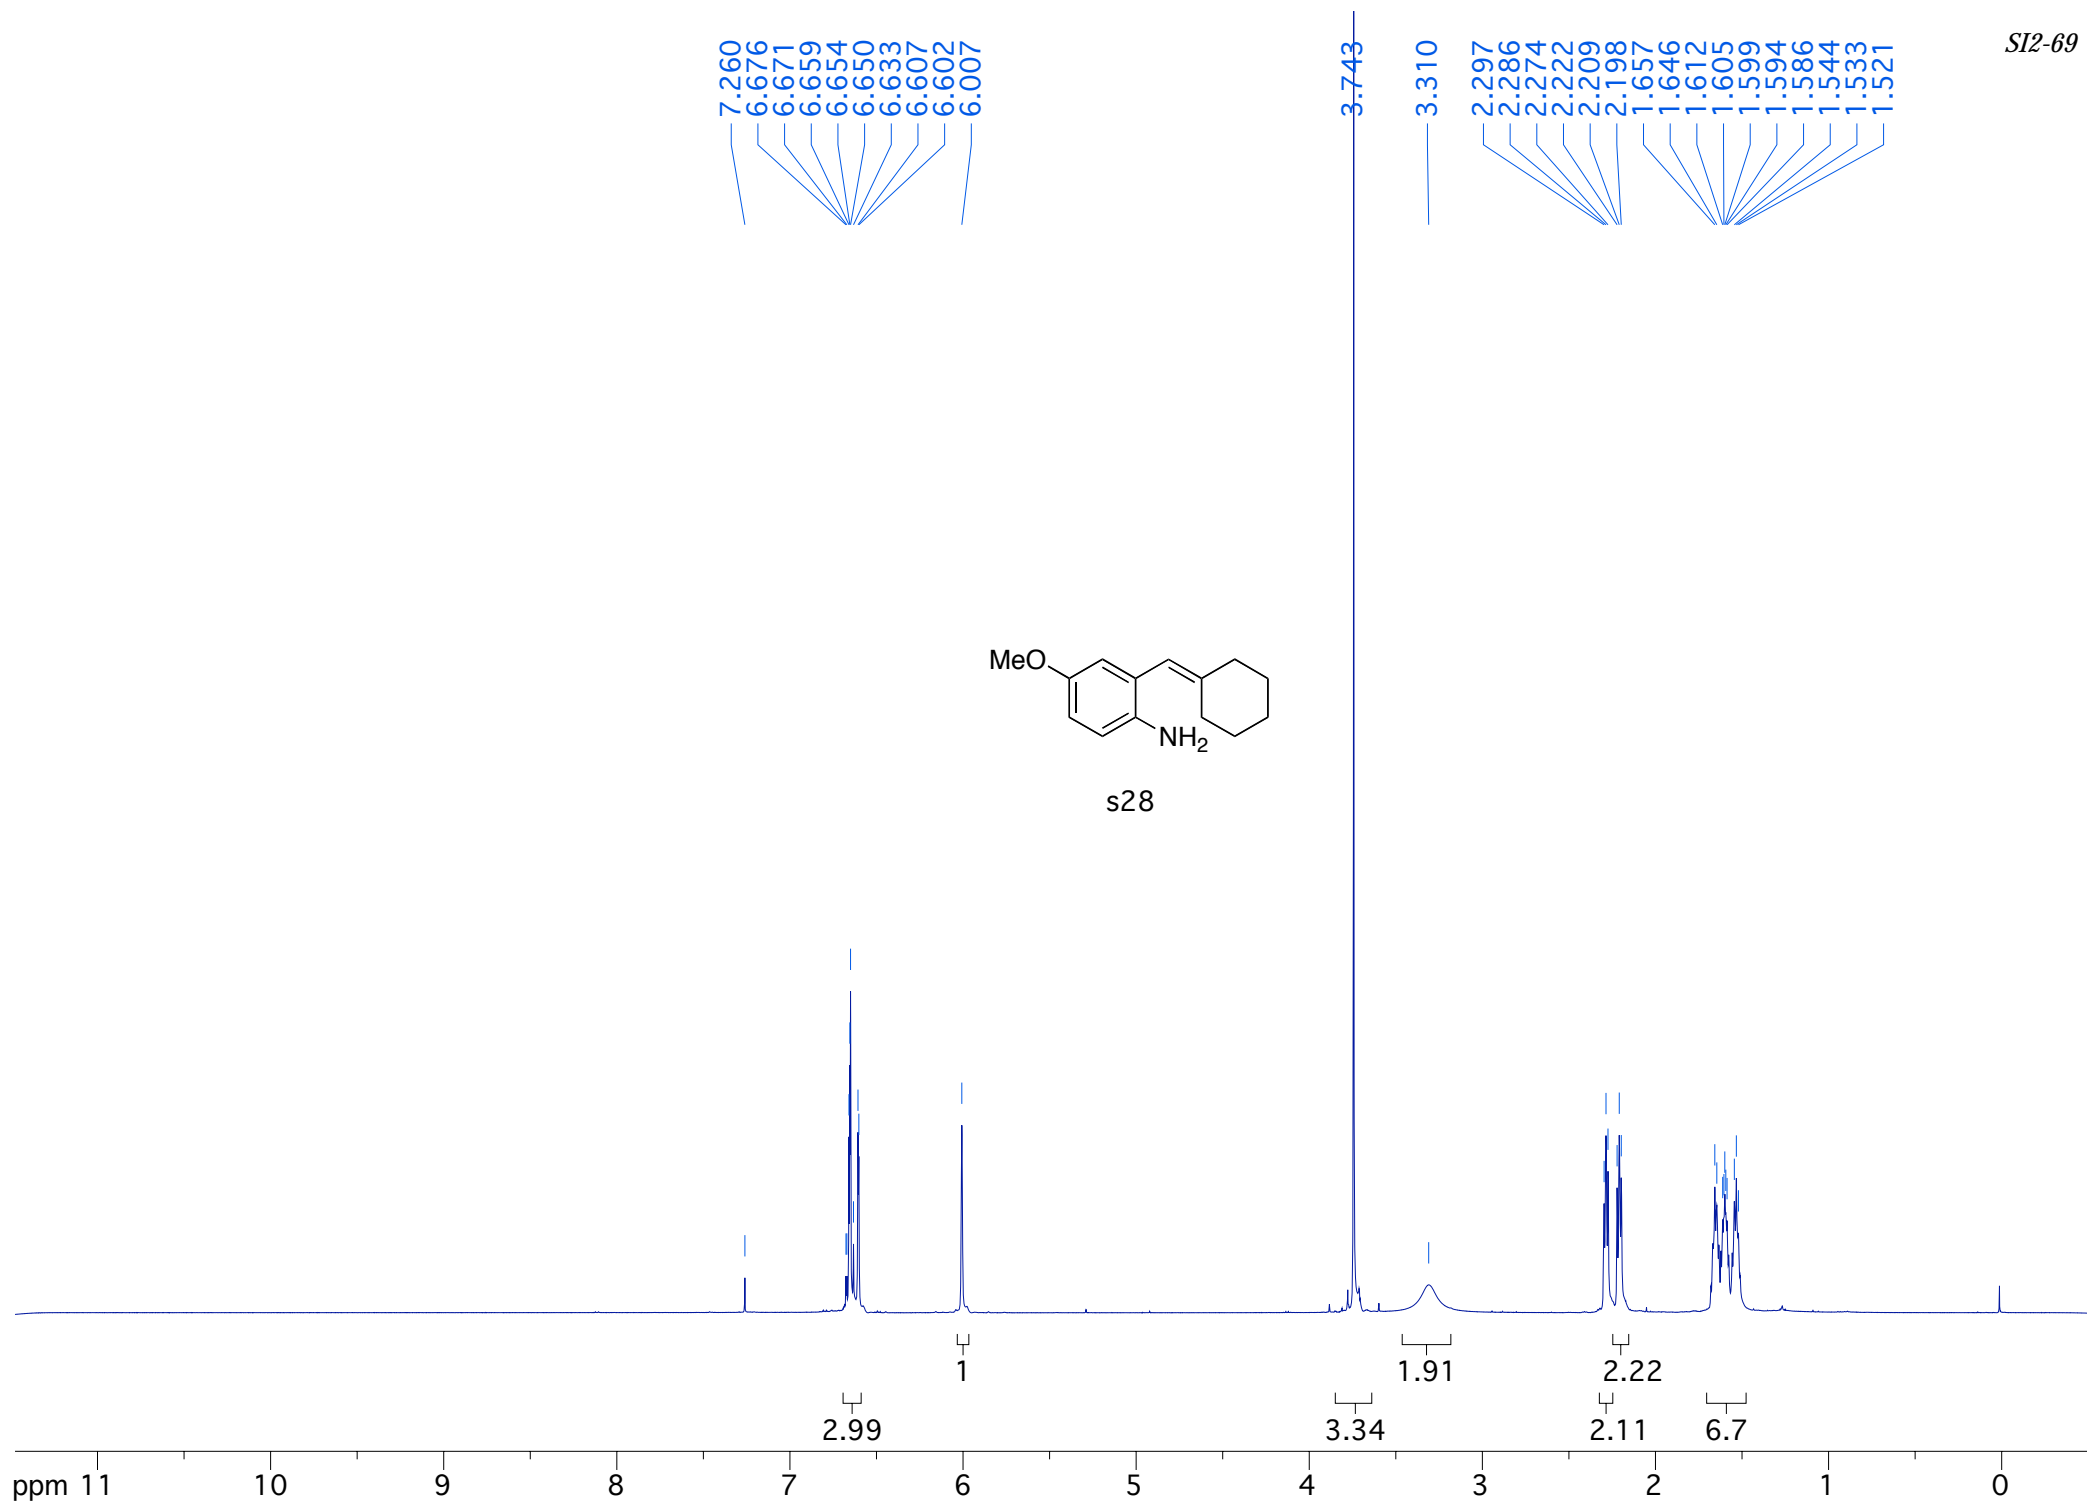

152.167  
145.556  
138.006  
125.298  
117.745  
116.073  
115.705  
113.092  
77.378  
77.127  
76.873  
55.768  
37.153  
29.954  
28.811  
28.014  
26.666

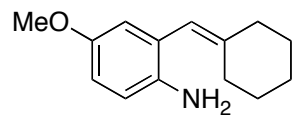

s28

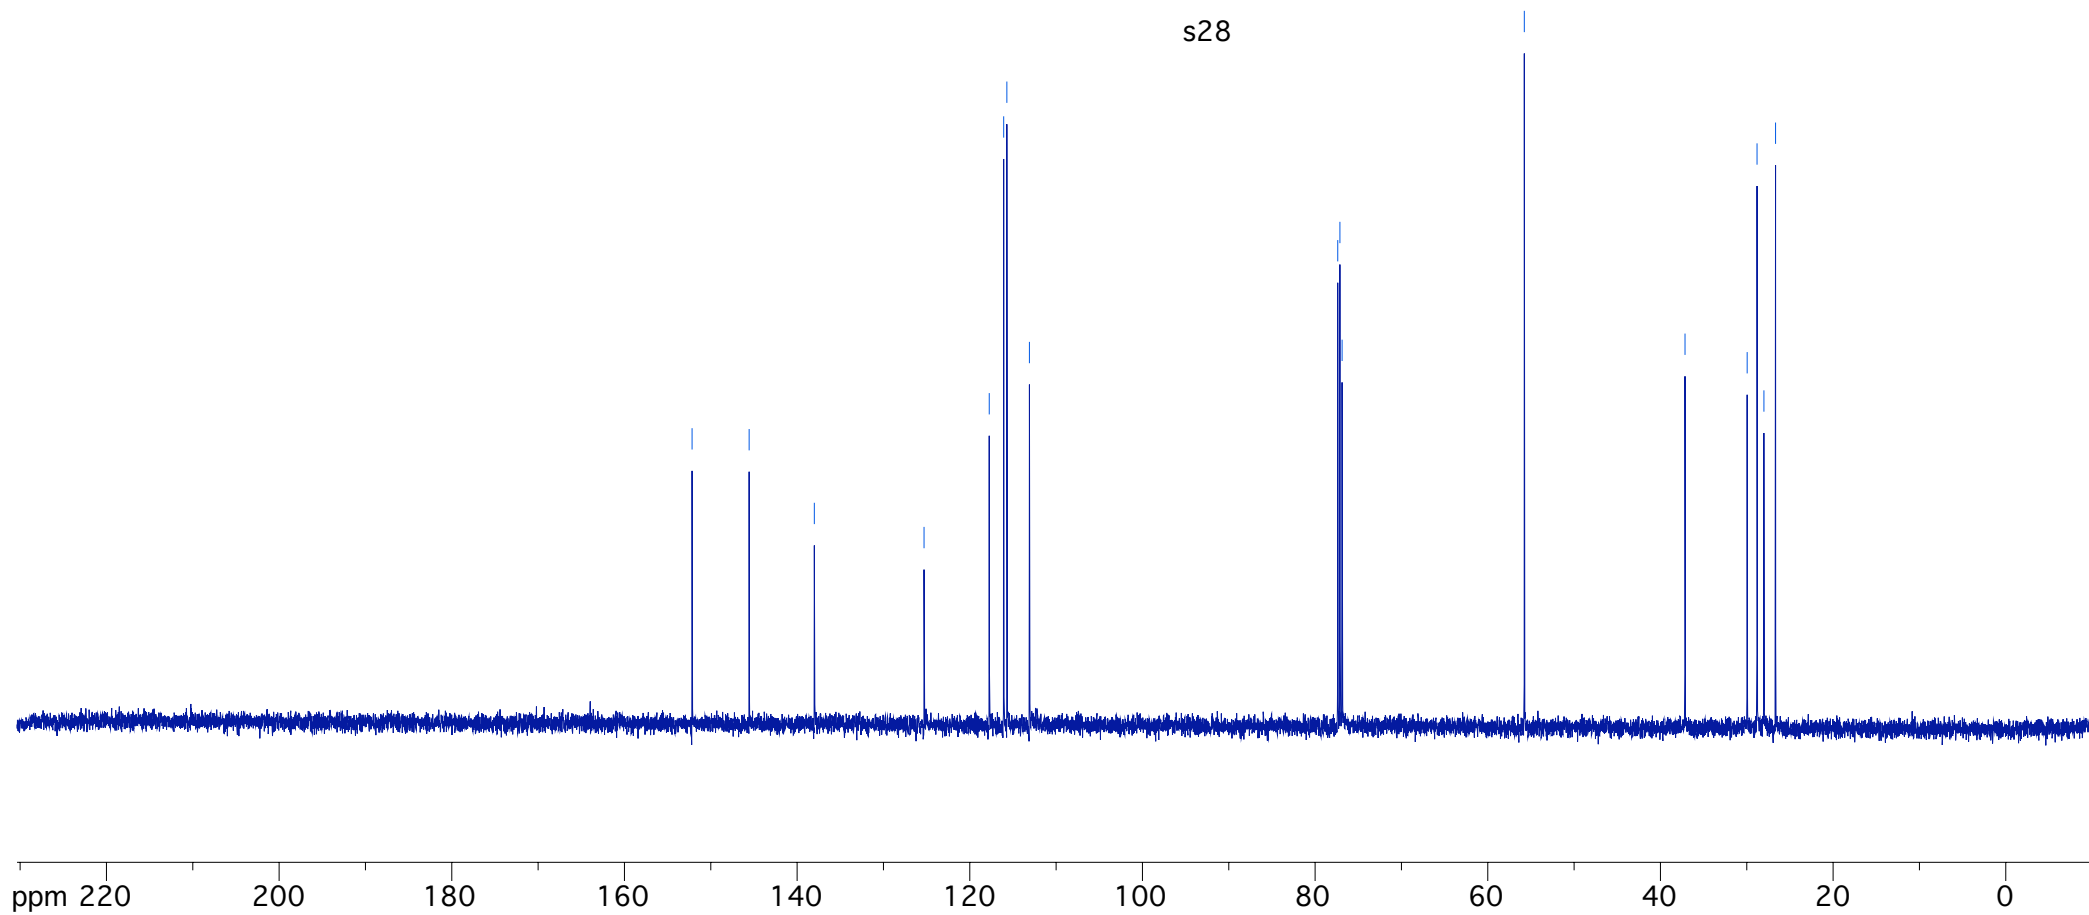

7.318  
7.317  
7.314  
7.302  
7.300  
7.297  
7.264  
7.260  
6.704  
6.688

5.977

4.005

2.334  
2.332  
2.321  
2.310  
2.308  
2.197  
2.196  
2.184  
2.173  
1.703  
1.691  
1.682  
1.679  
1.666  
1.642  
1.636  
1.630  
1.624  
1.617  
1.569  
1.557  
1.545

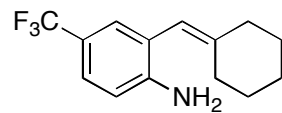

s29

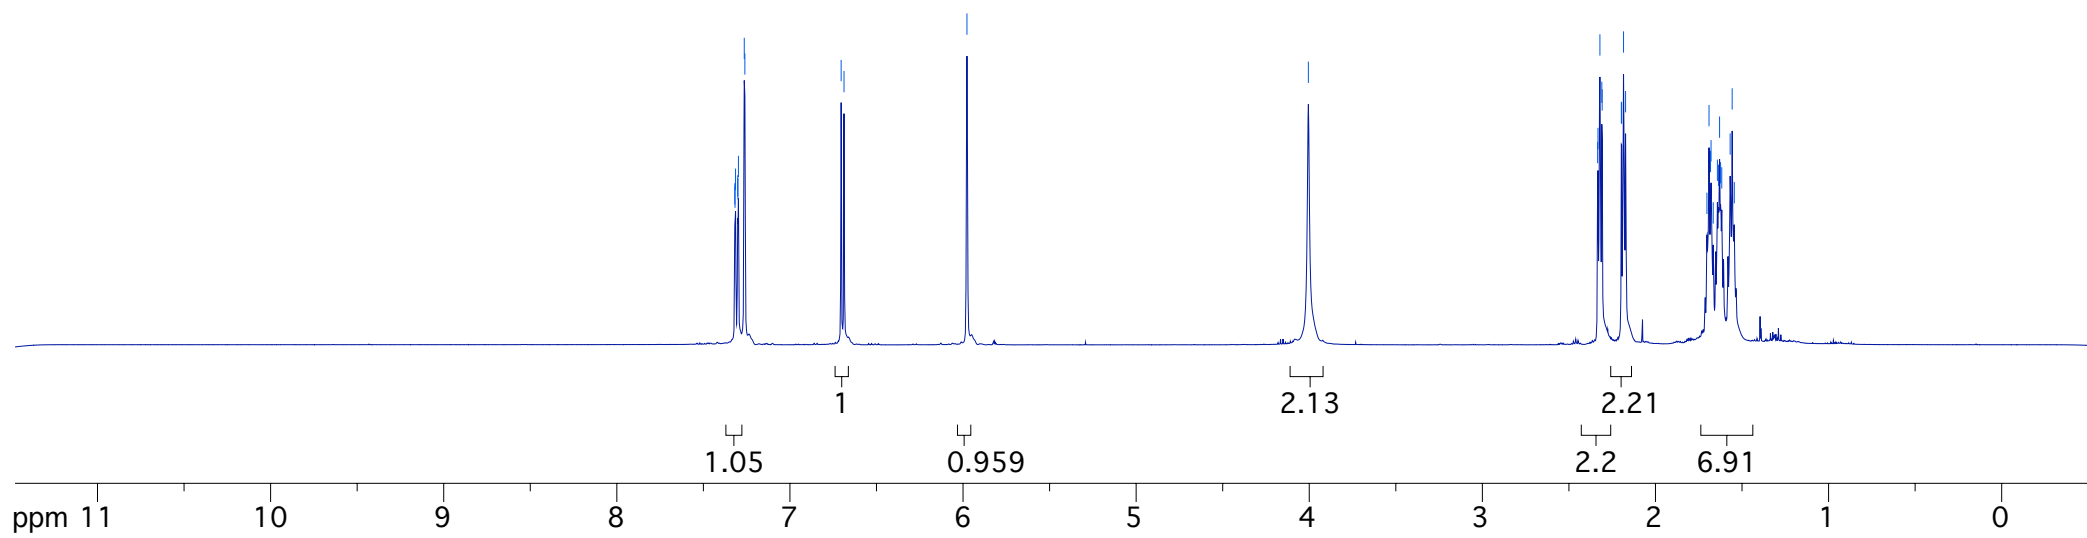

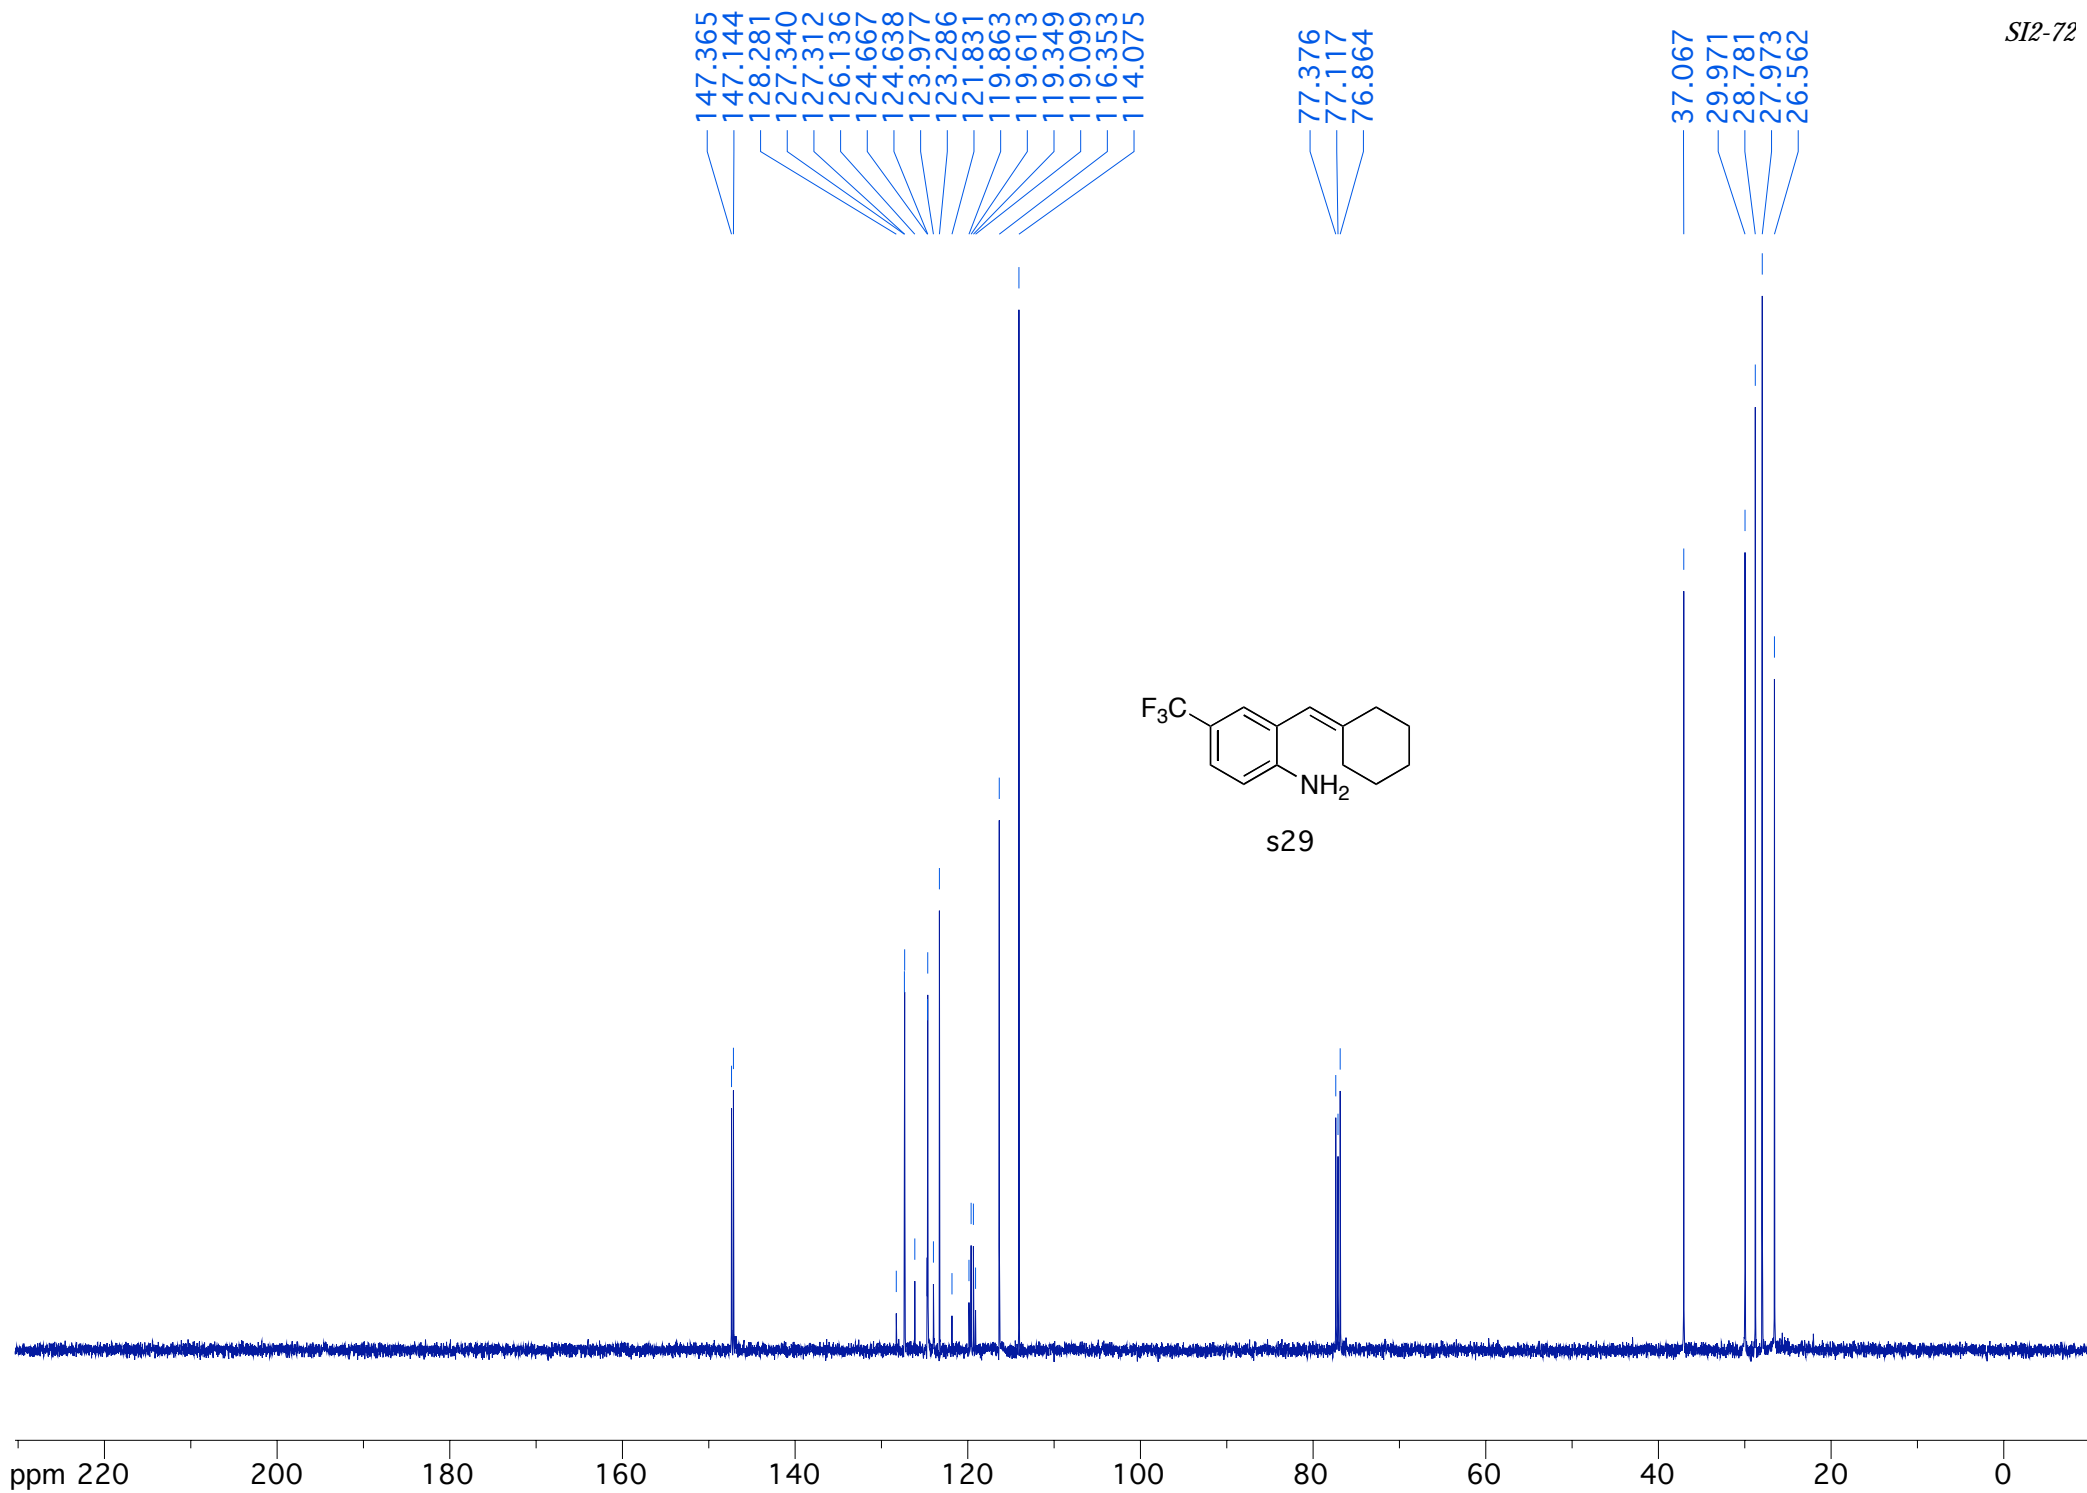



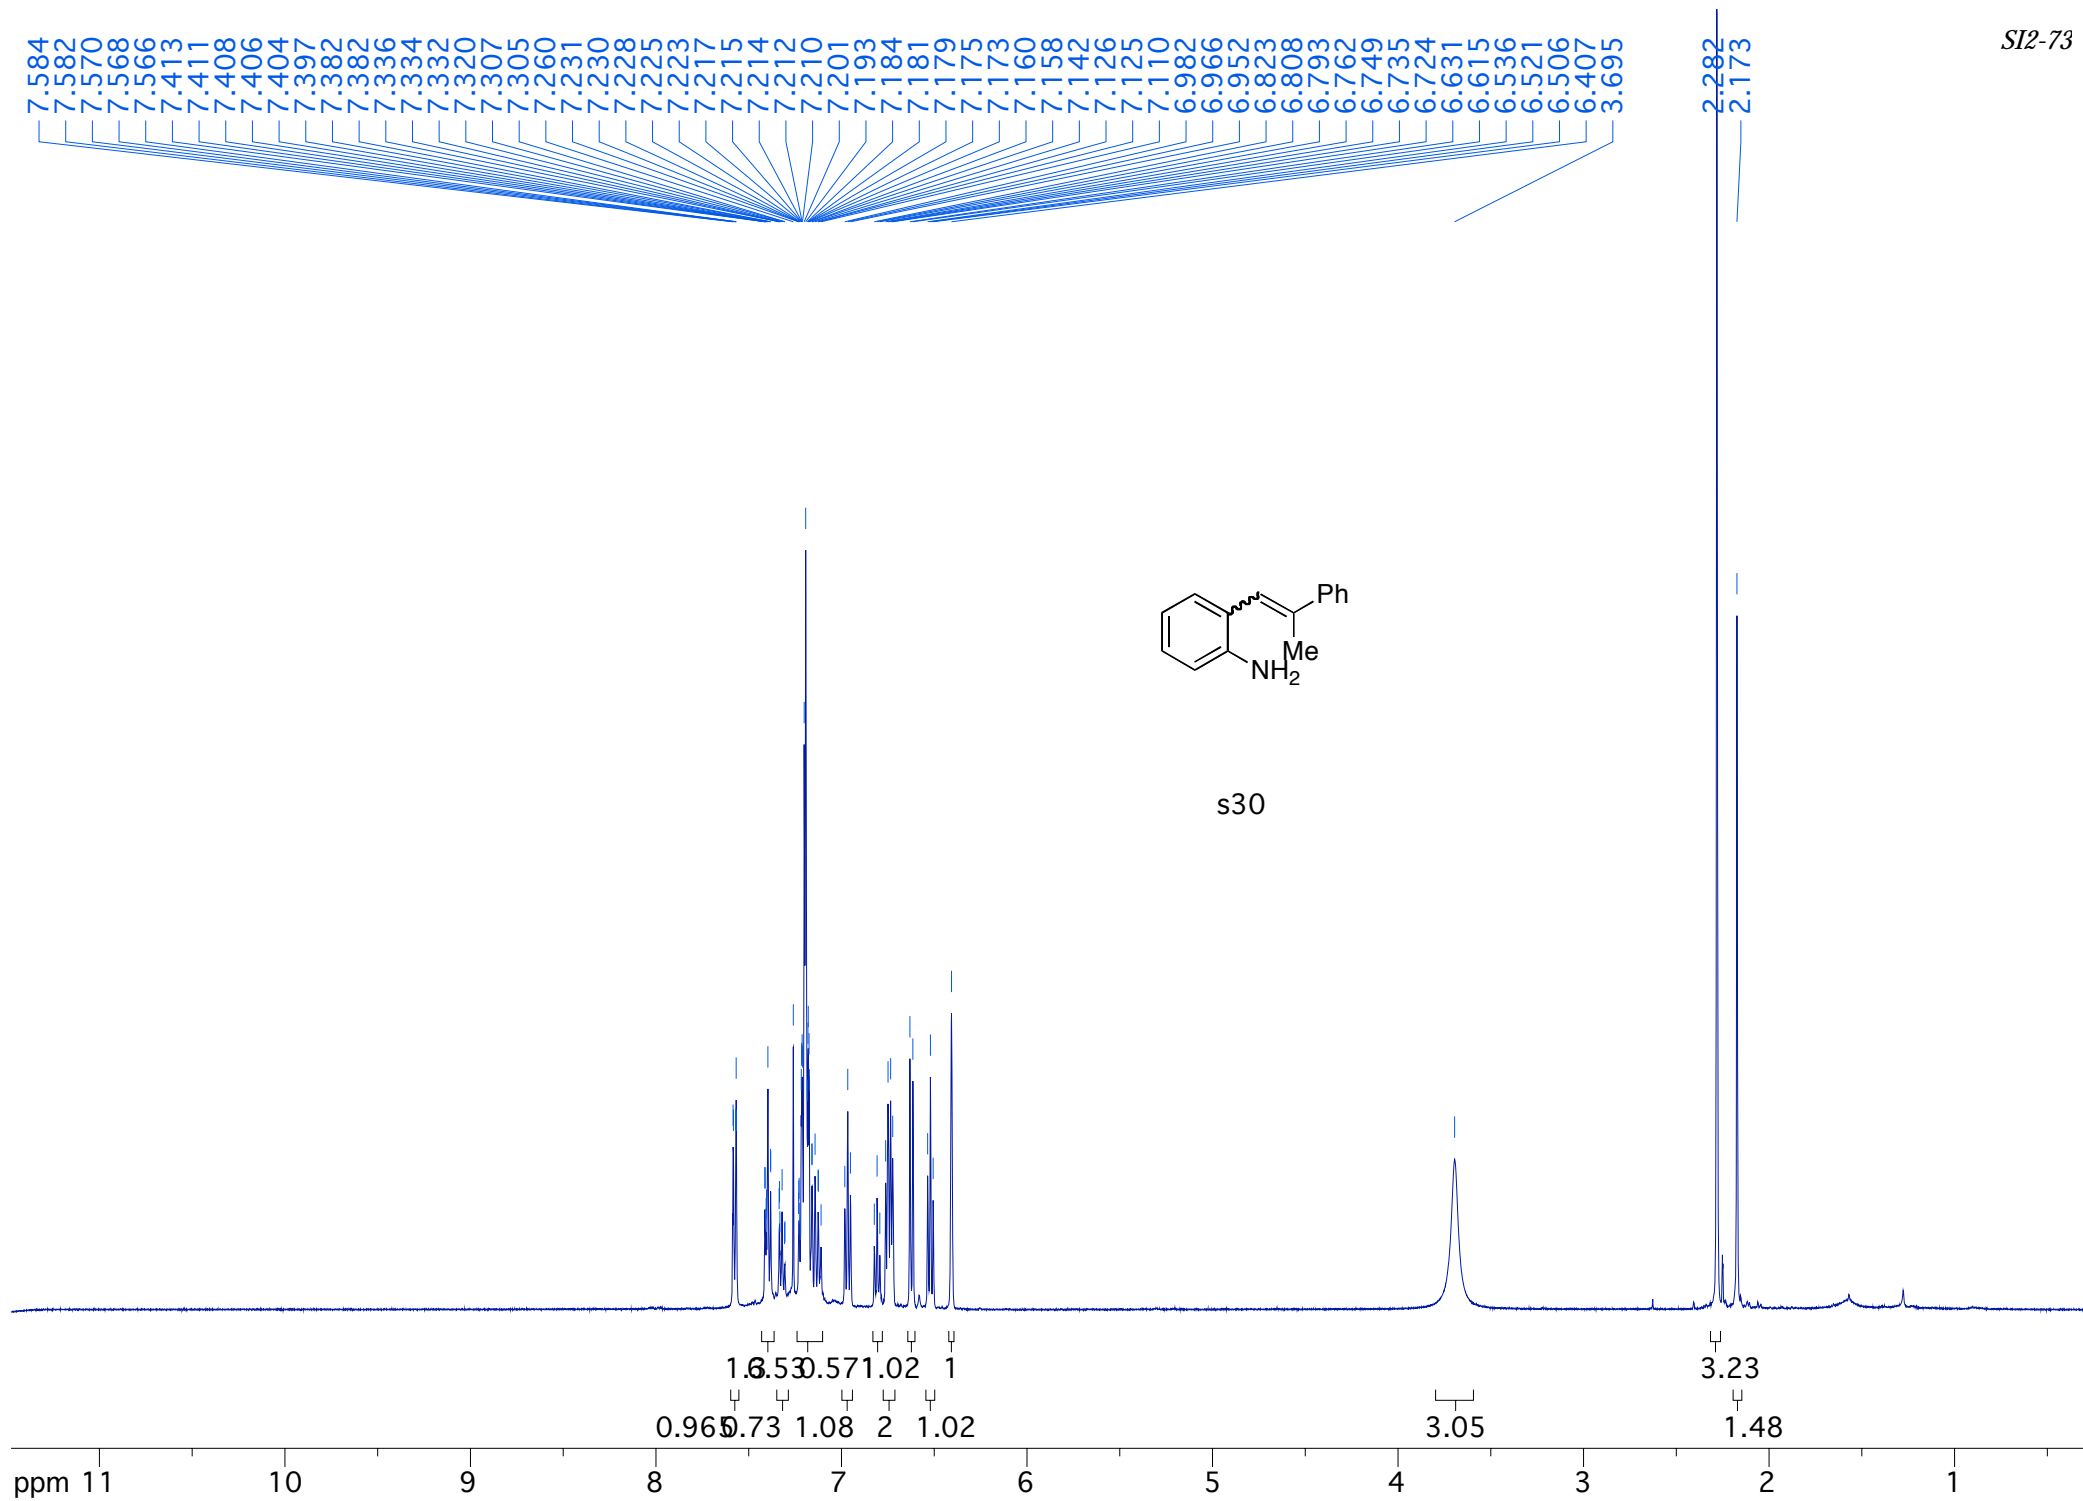

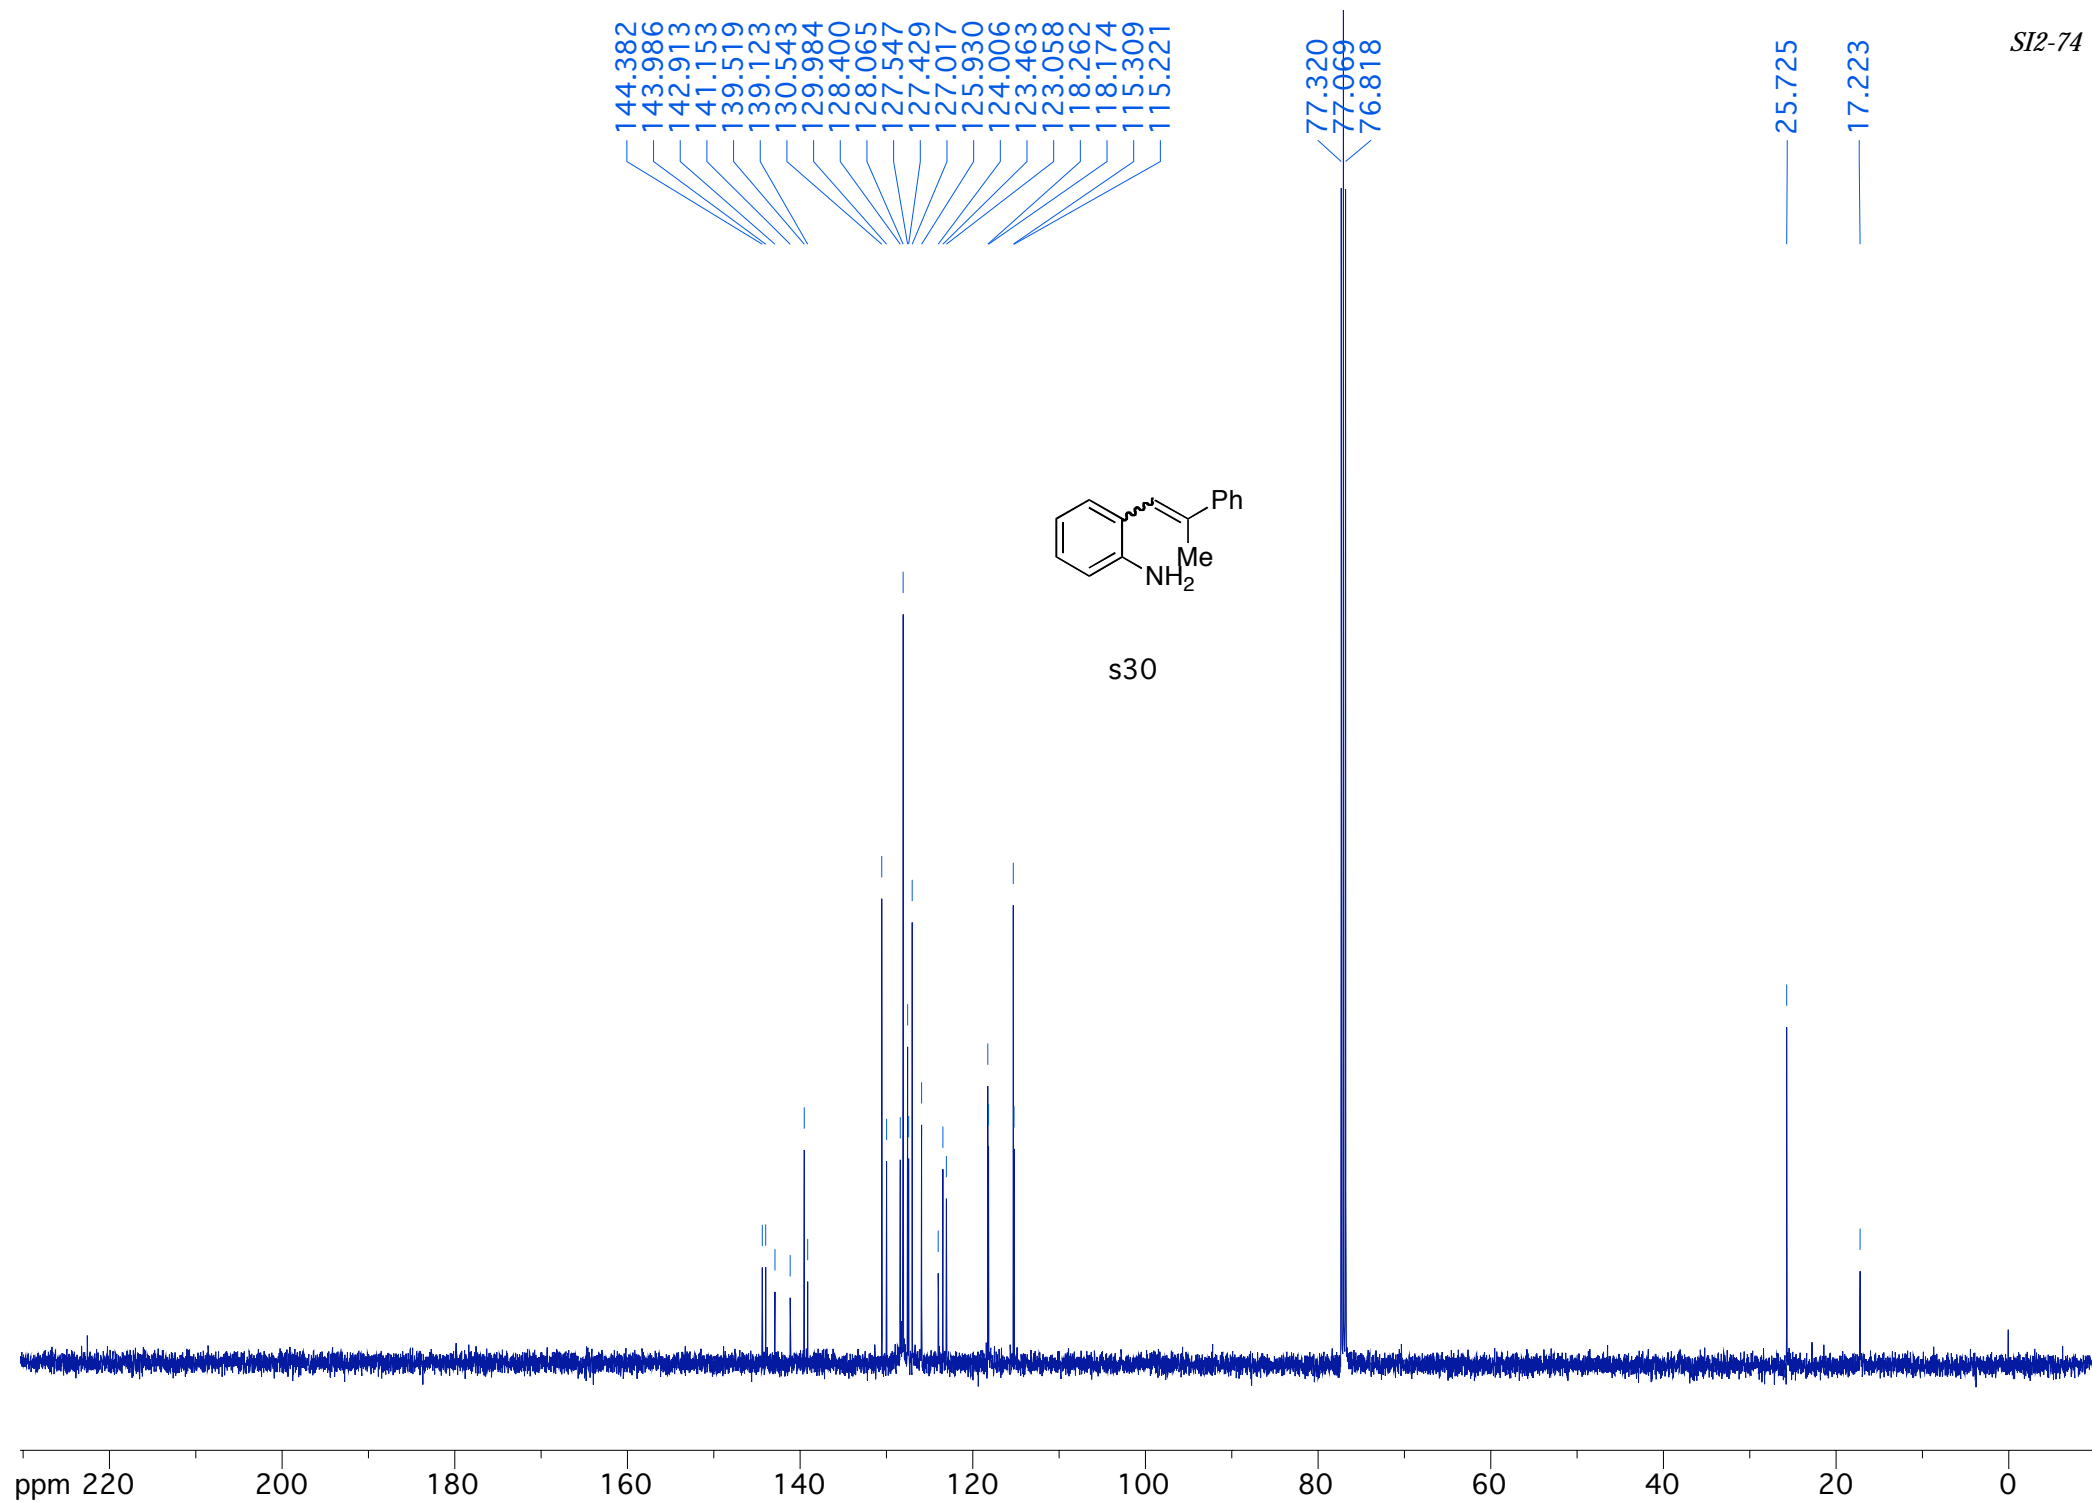

7.404  
7.402  
7.389  
7.386  
7.260  
7.250  
7.247  
7.233  
7.220  
7.217  
7.153  
7.139  
7.136  
7.134  
7.132  
7.119  
7.117  
7.104  
7.102  
6.491

2.551  
2.537  
2.523  
2.493  
2.479  
2.465  
1.797  
1.784  
1.770  
1.757  
1.742  
1.739  
1.728  
1.715  
1.714  
1.700  
1.687

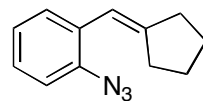

17b

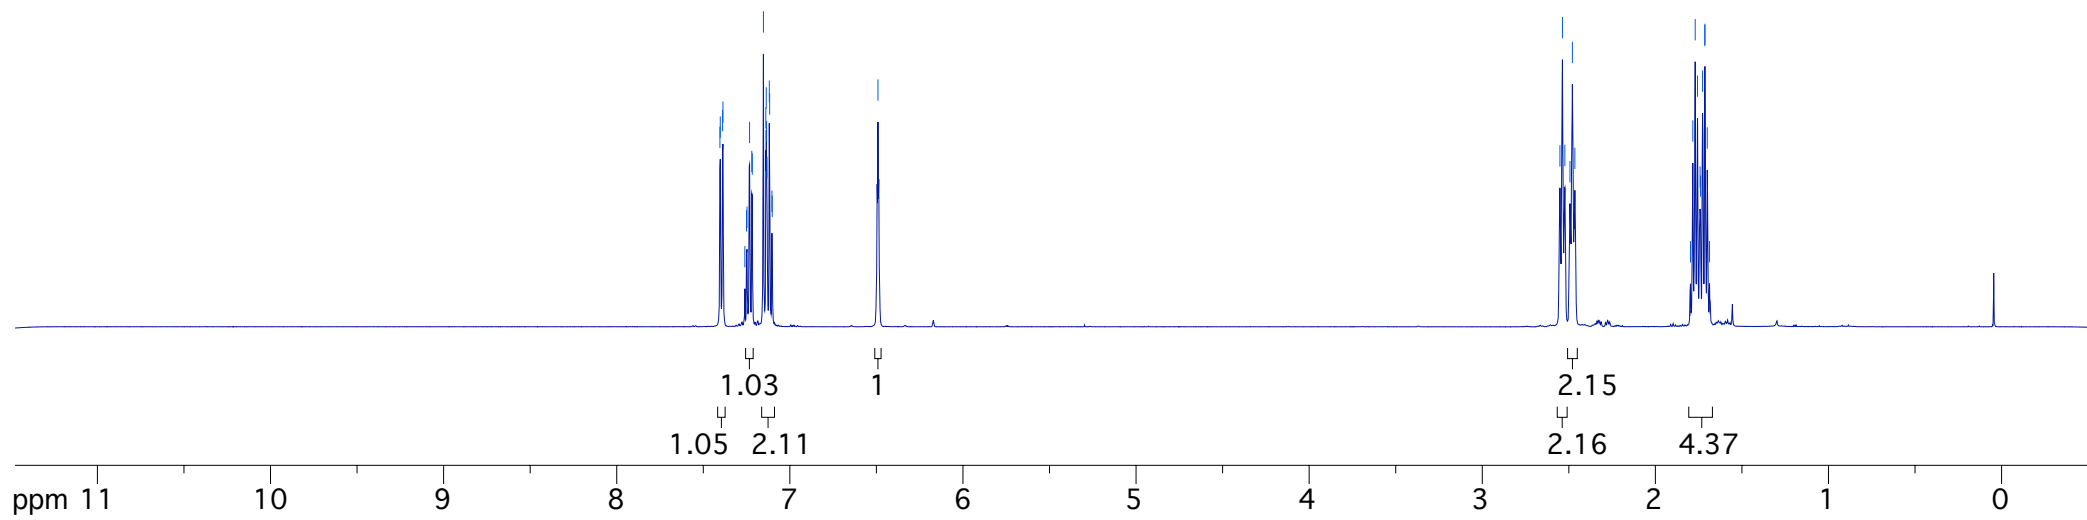

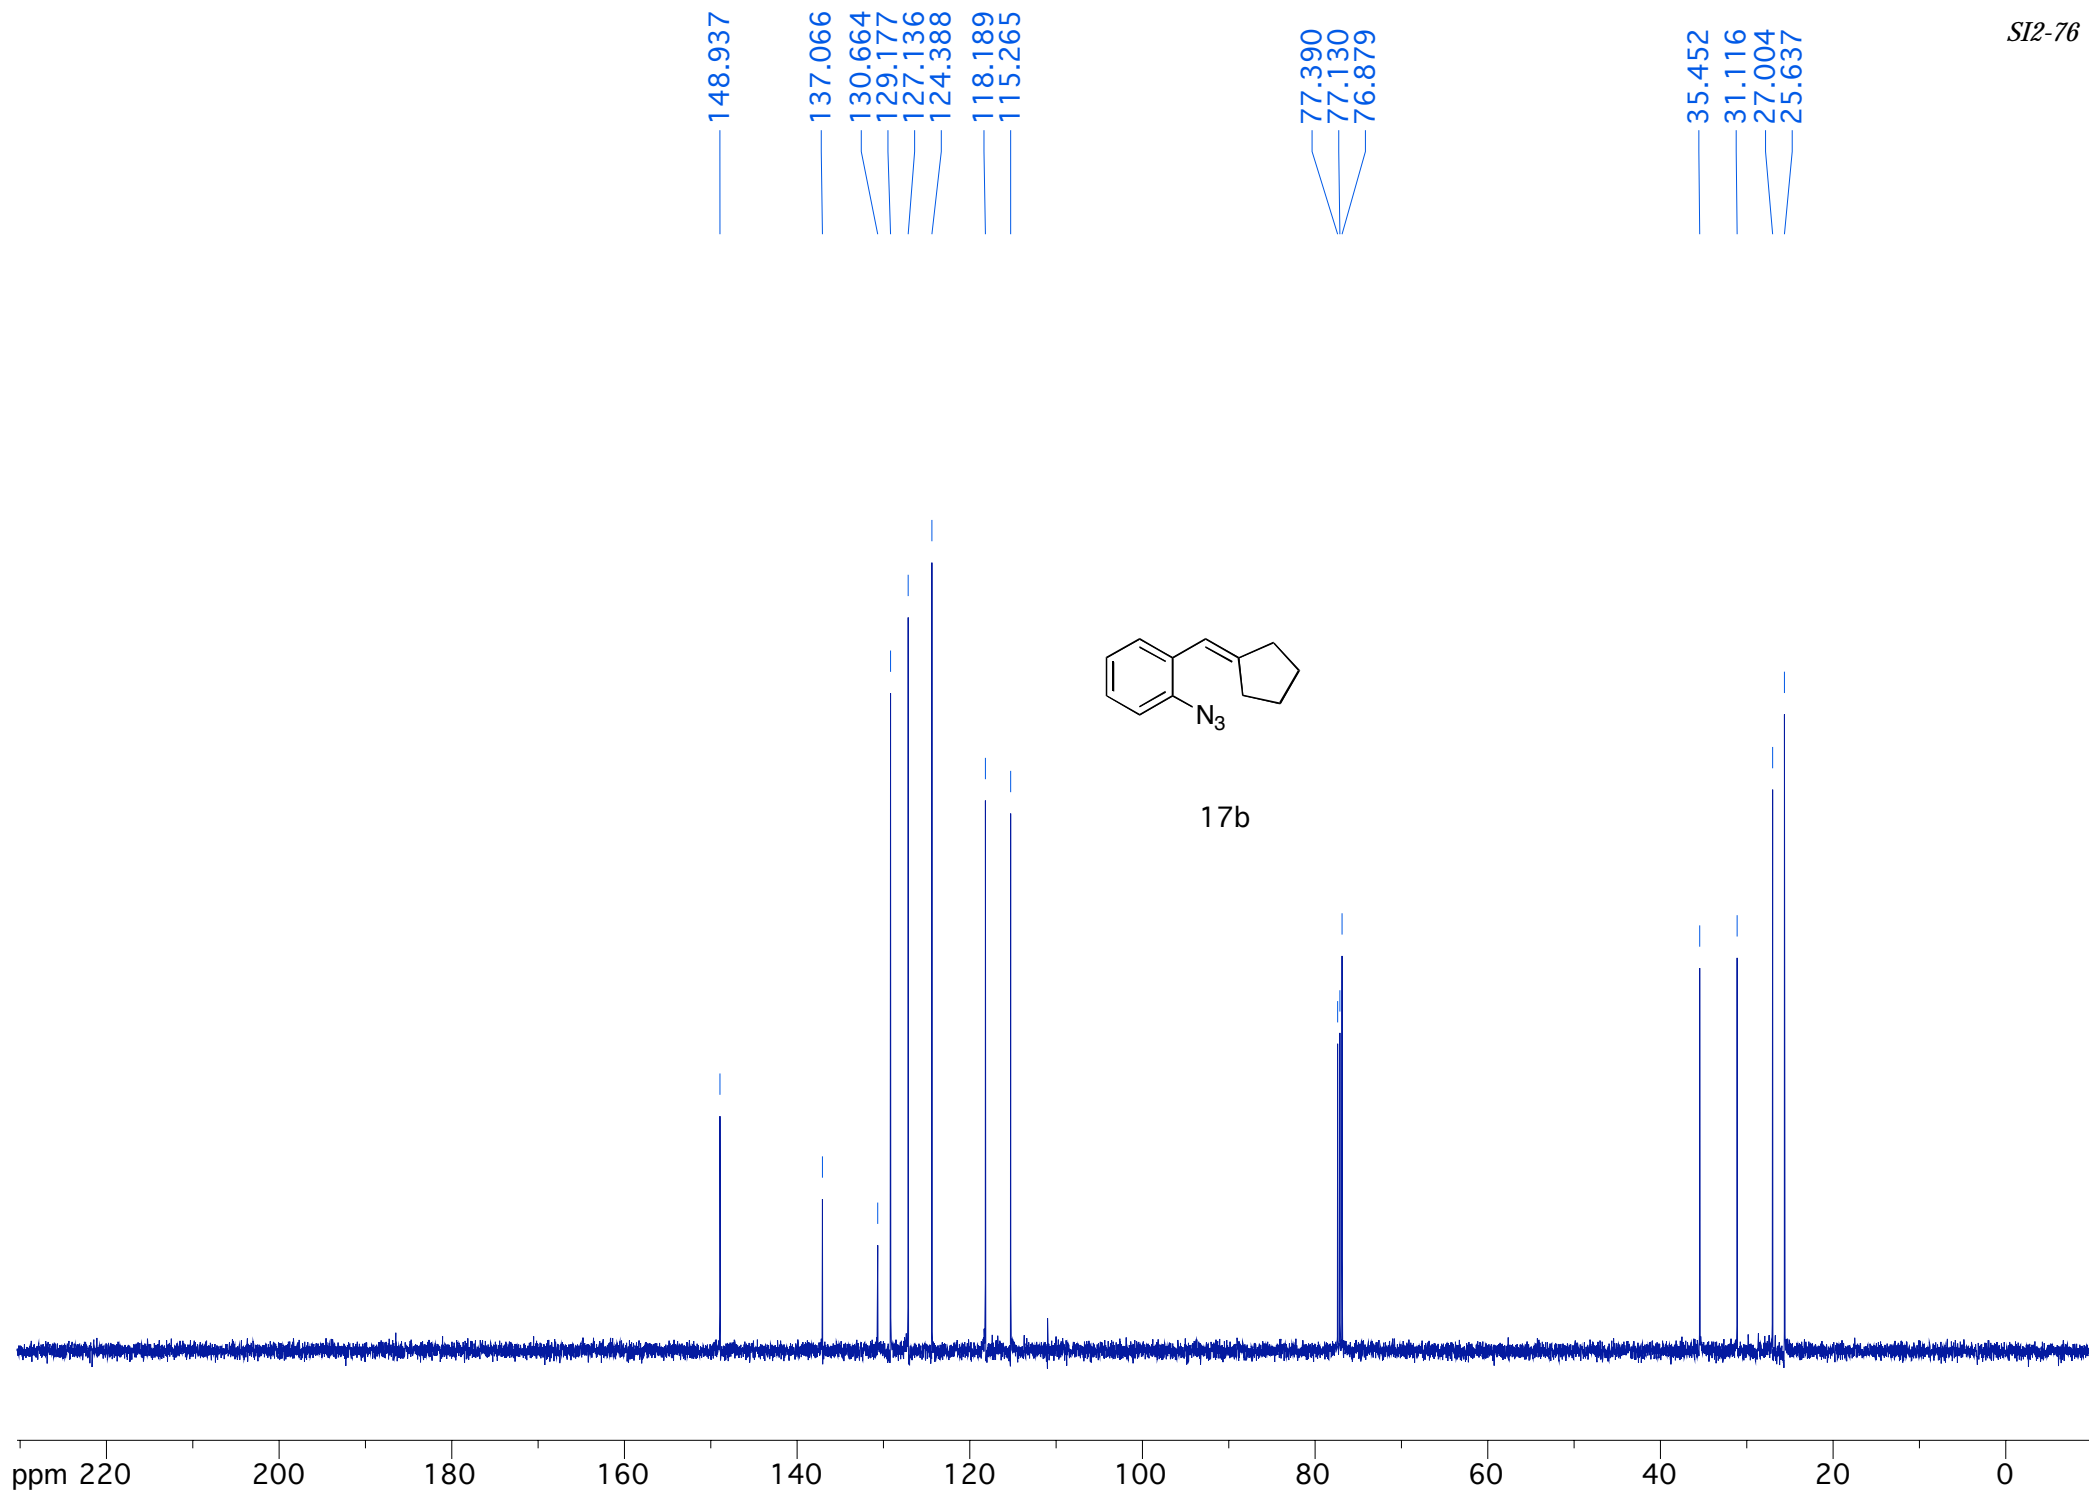

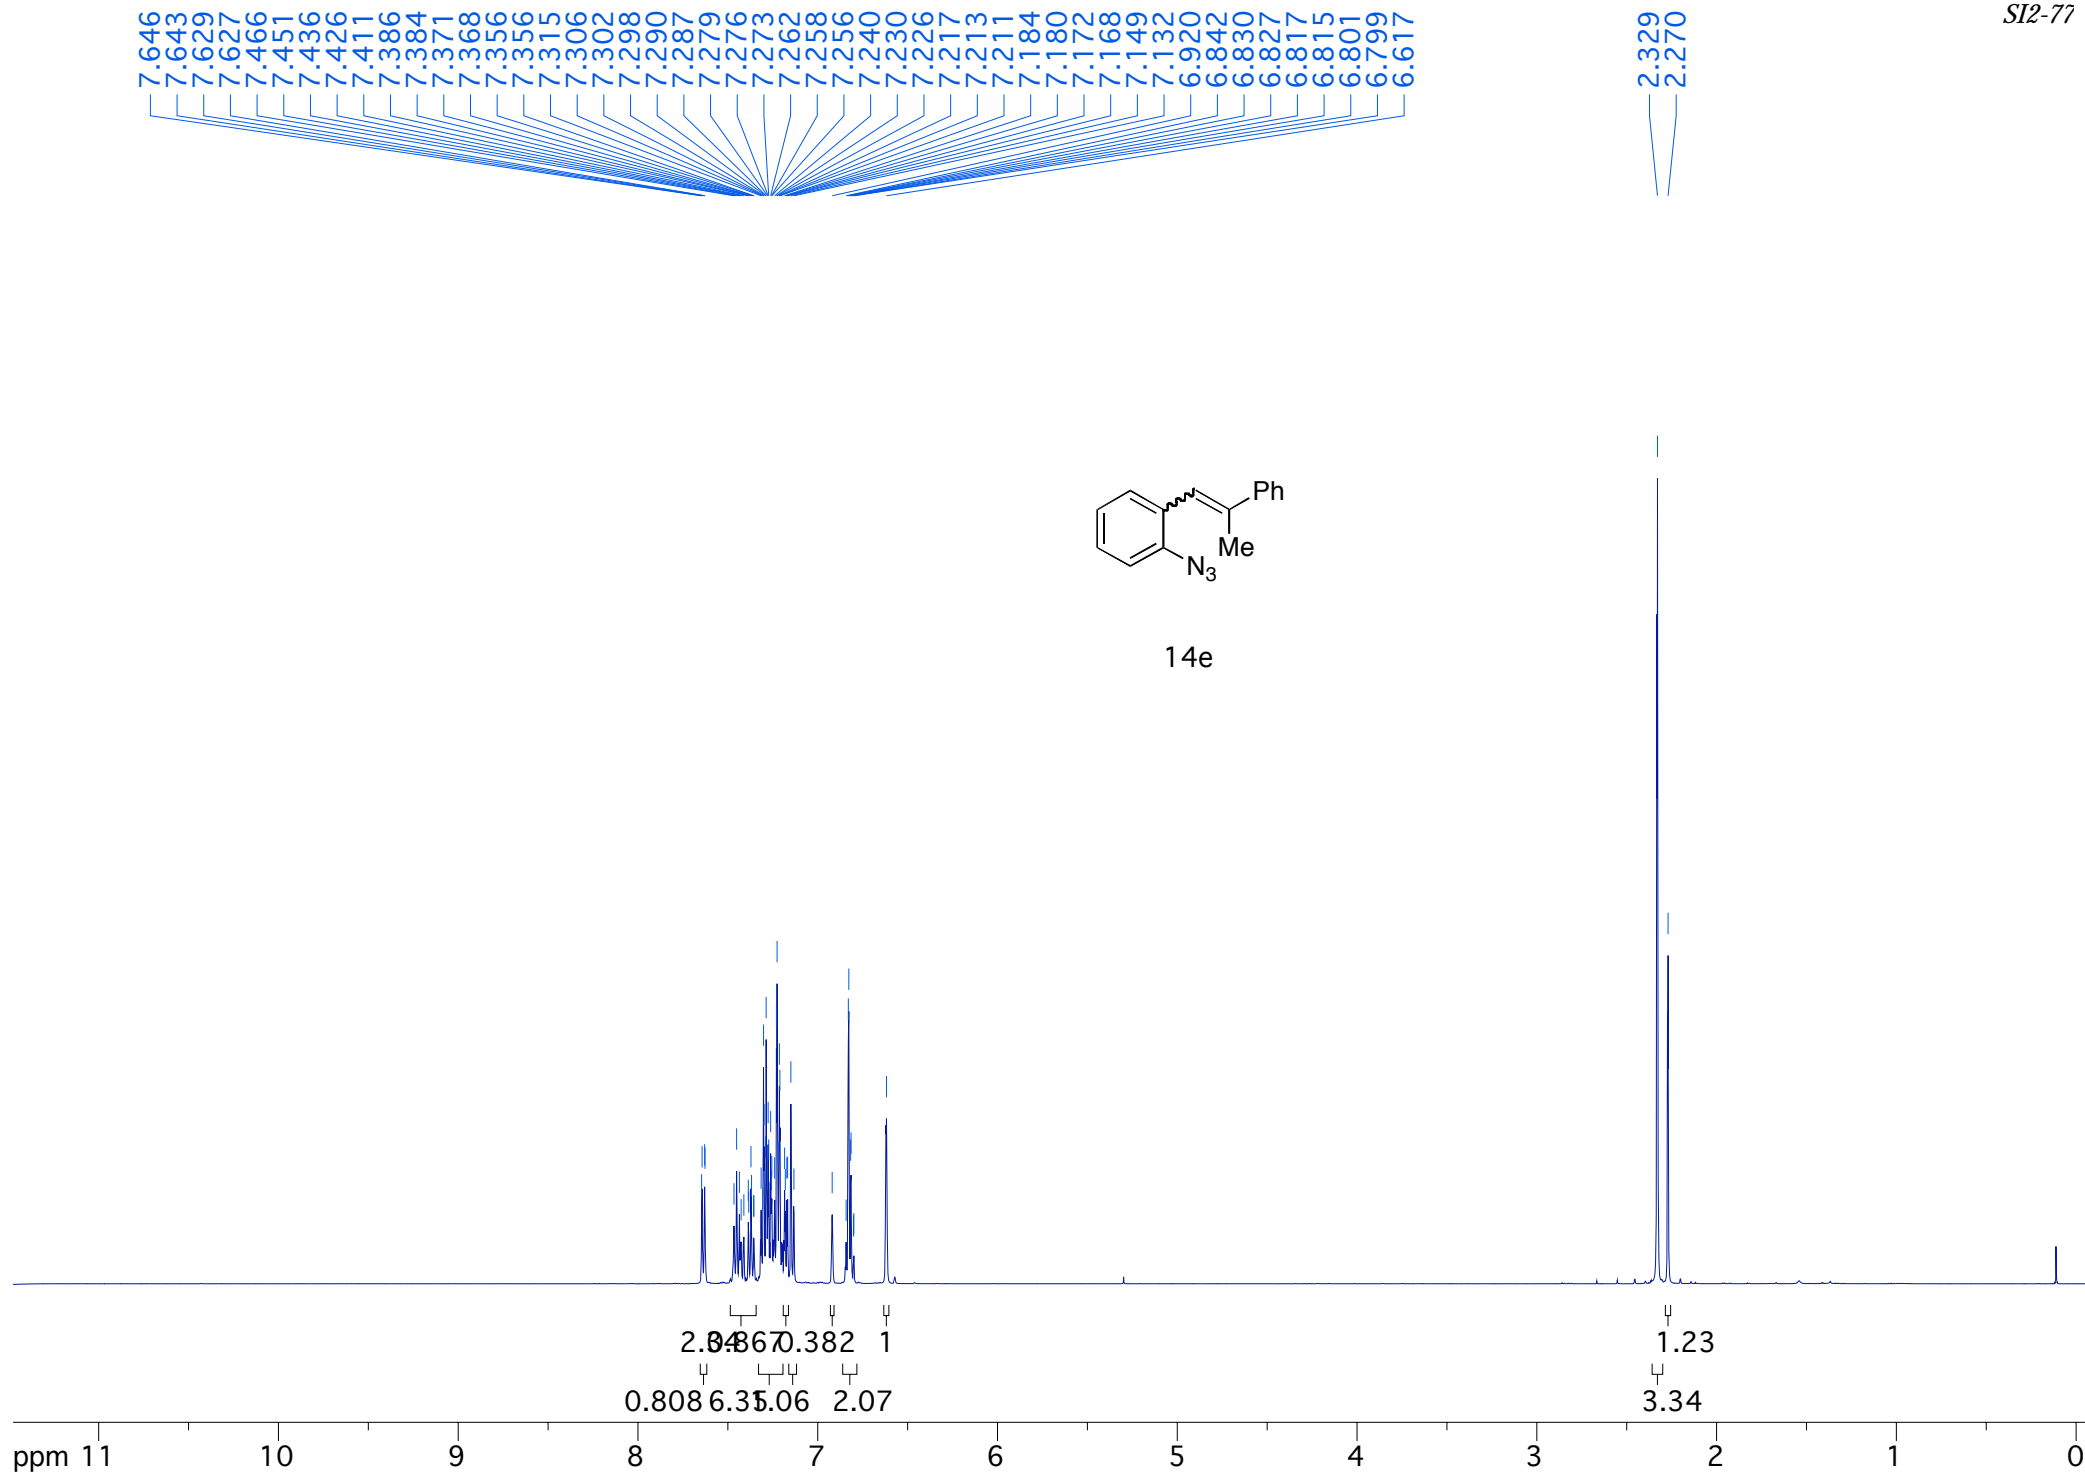

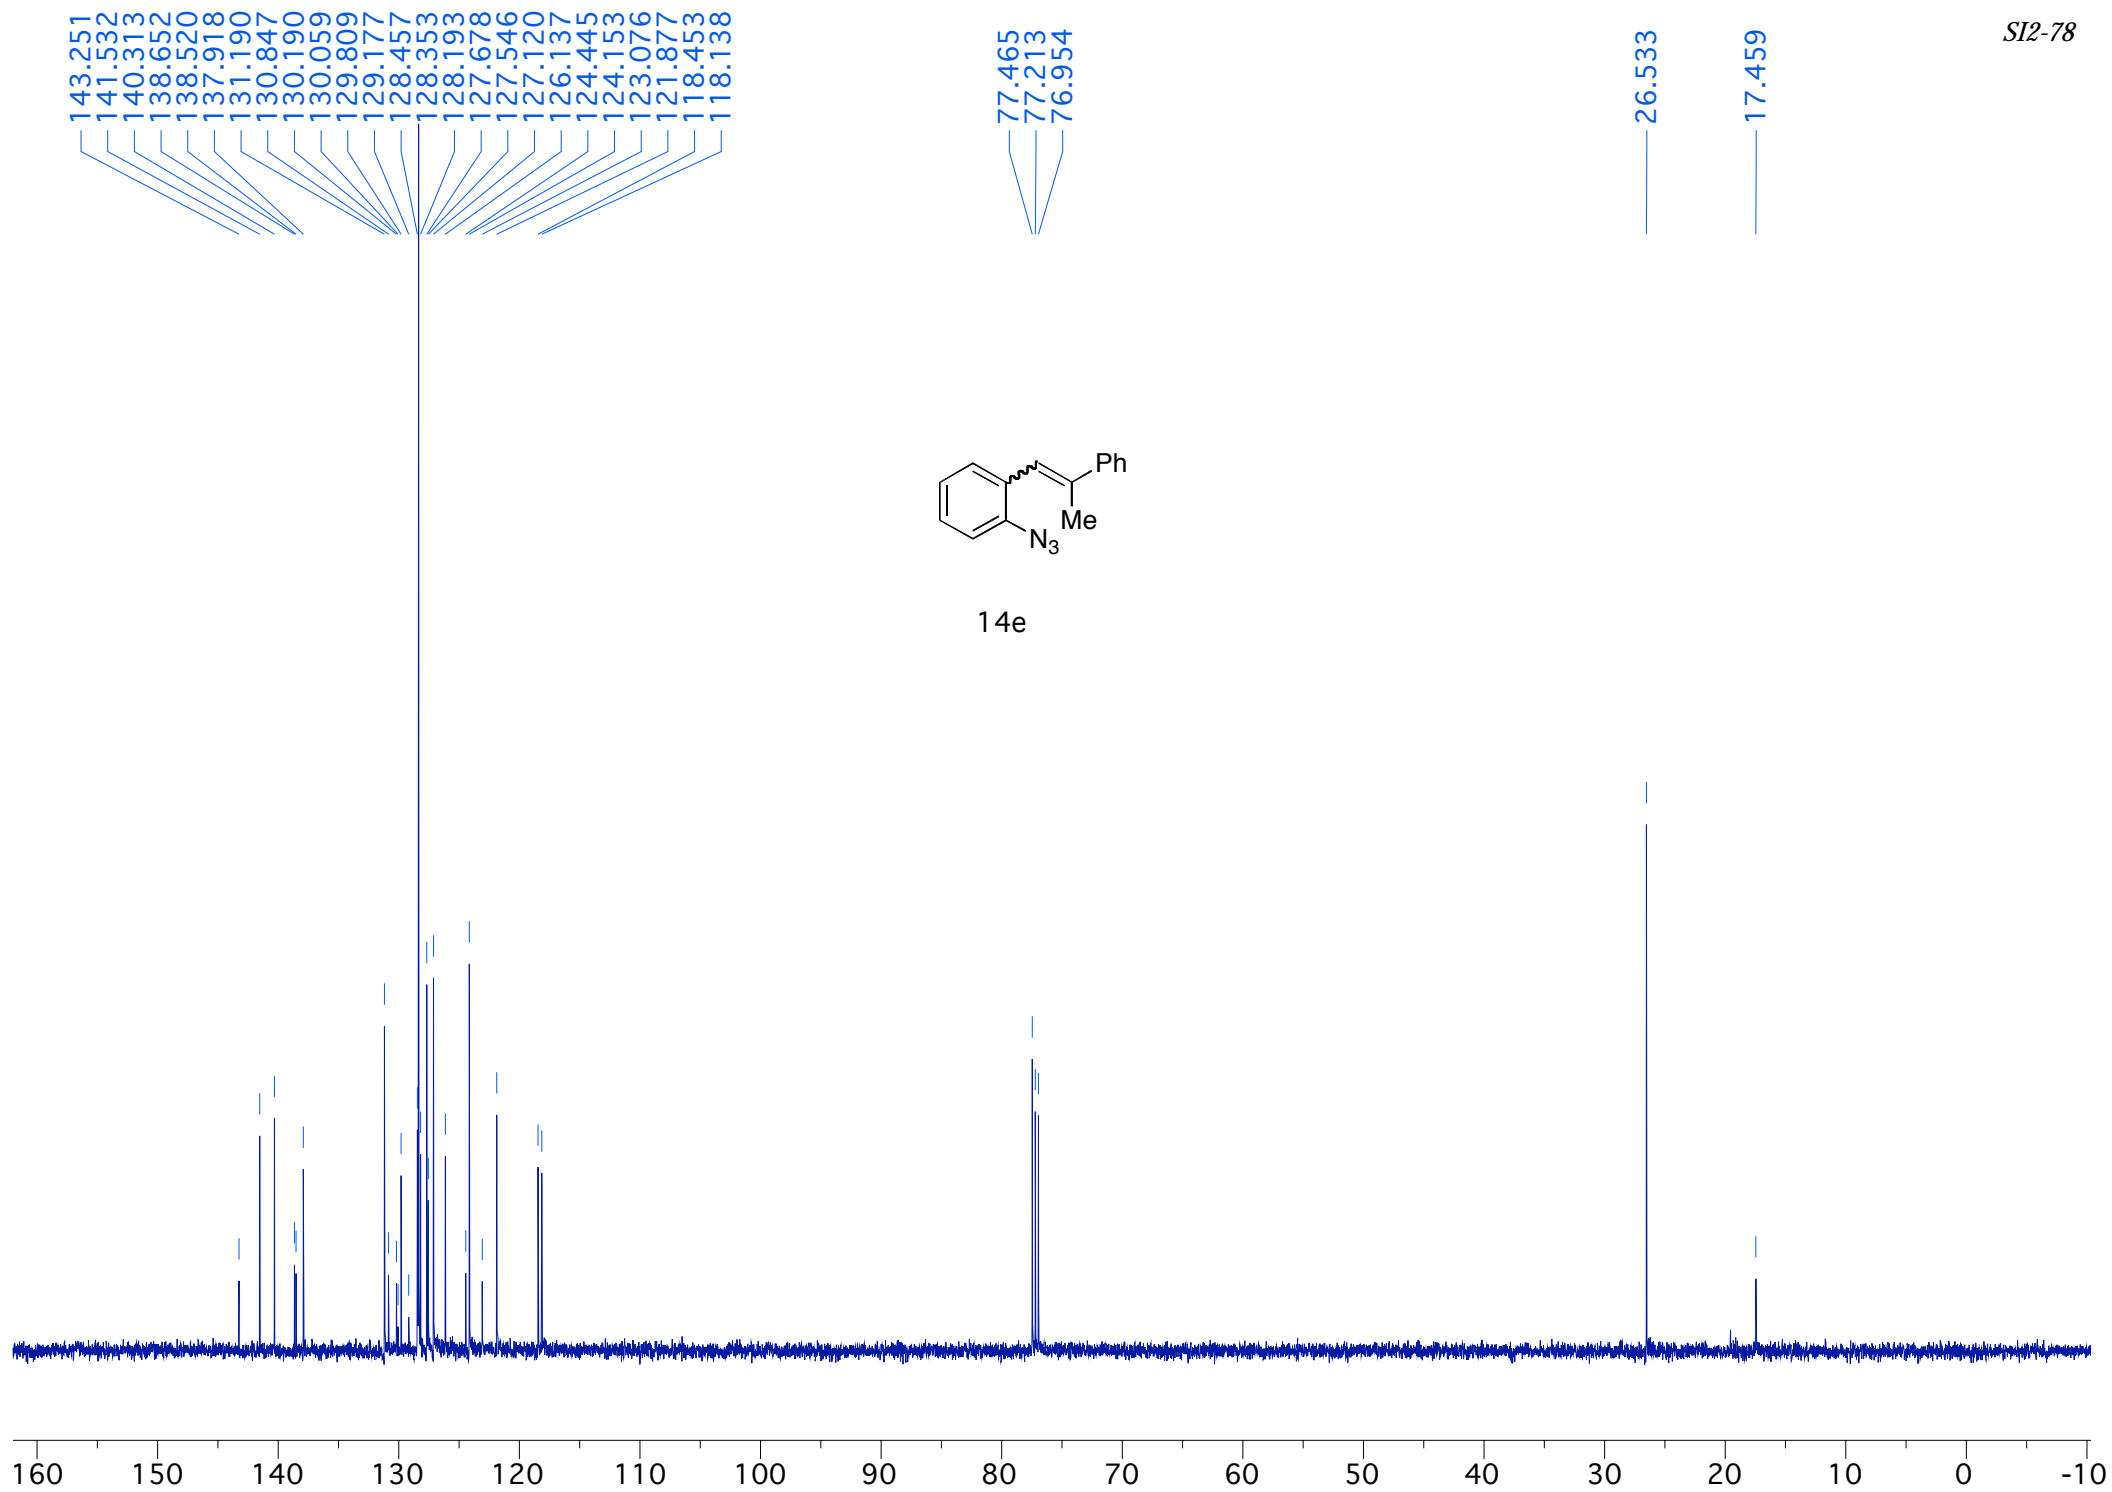

7.265  
7.264  
7.260  
7.252  
7.250  
7.249  
7.236  
7.234  
7.233  
7.176  
7.161  
7.141  
7.139  
7.125  
7.123  
7.101  
7.099  
7.087  
7.084  
7.071  
7.070  
6.142

2.311  
2.300  
2.289  
2.258  
2.247  
2.236  
1.684  
1.681  
1.672  
1.663  
1.660  
1.648  
1.632  
1.623  
1.615  
1.611  
1.606  
1.597  
1.588  
1.581  
1.569  
1.558  
1.545

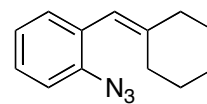

17c

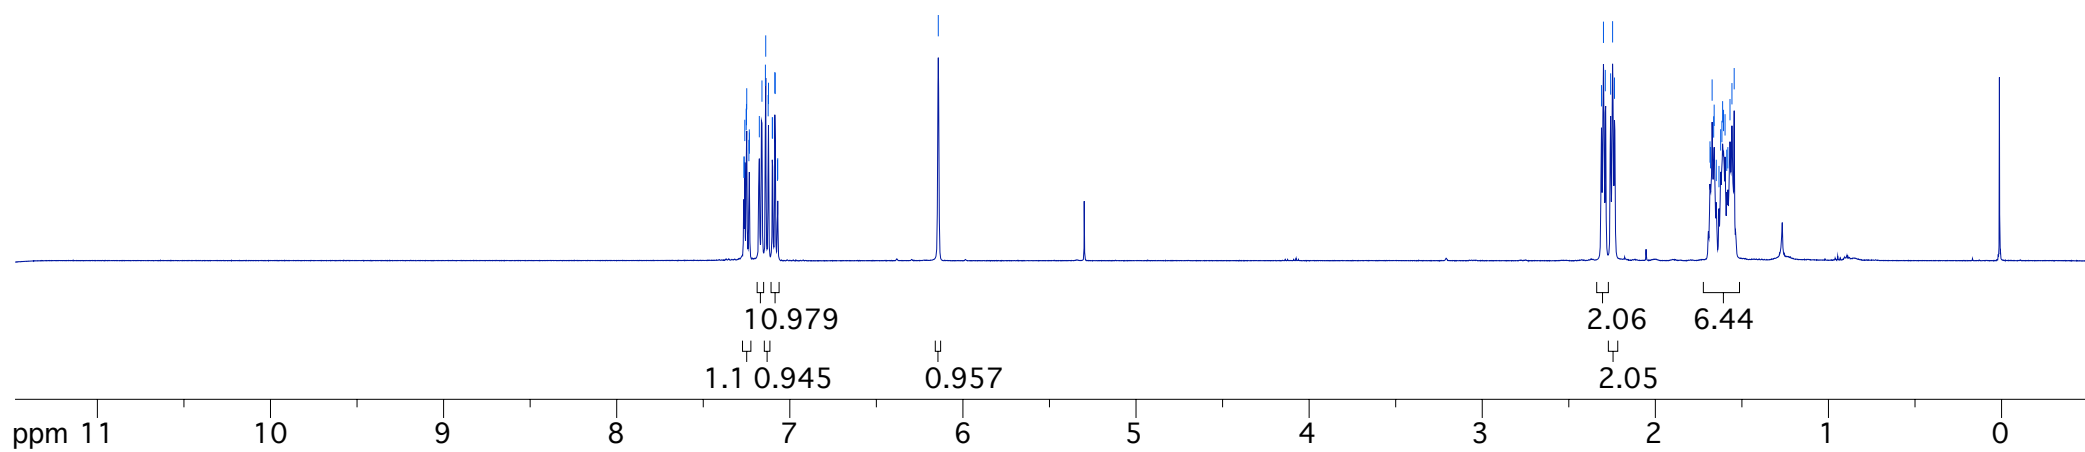

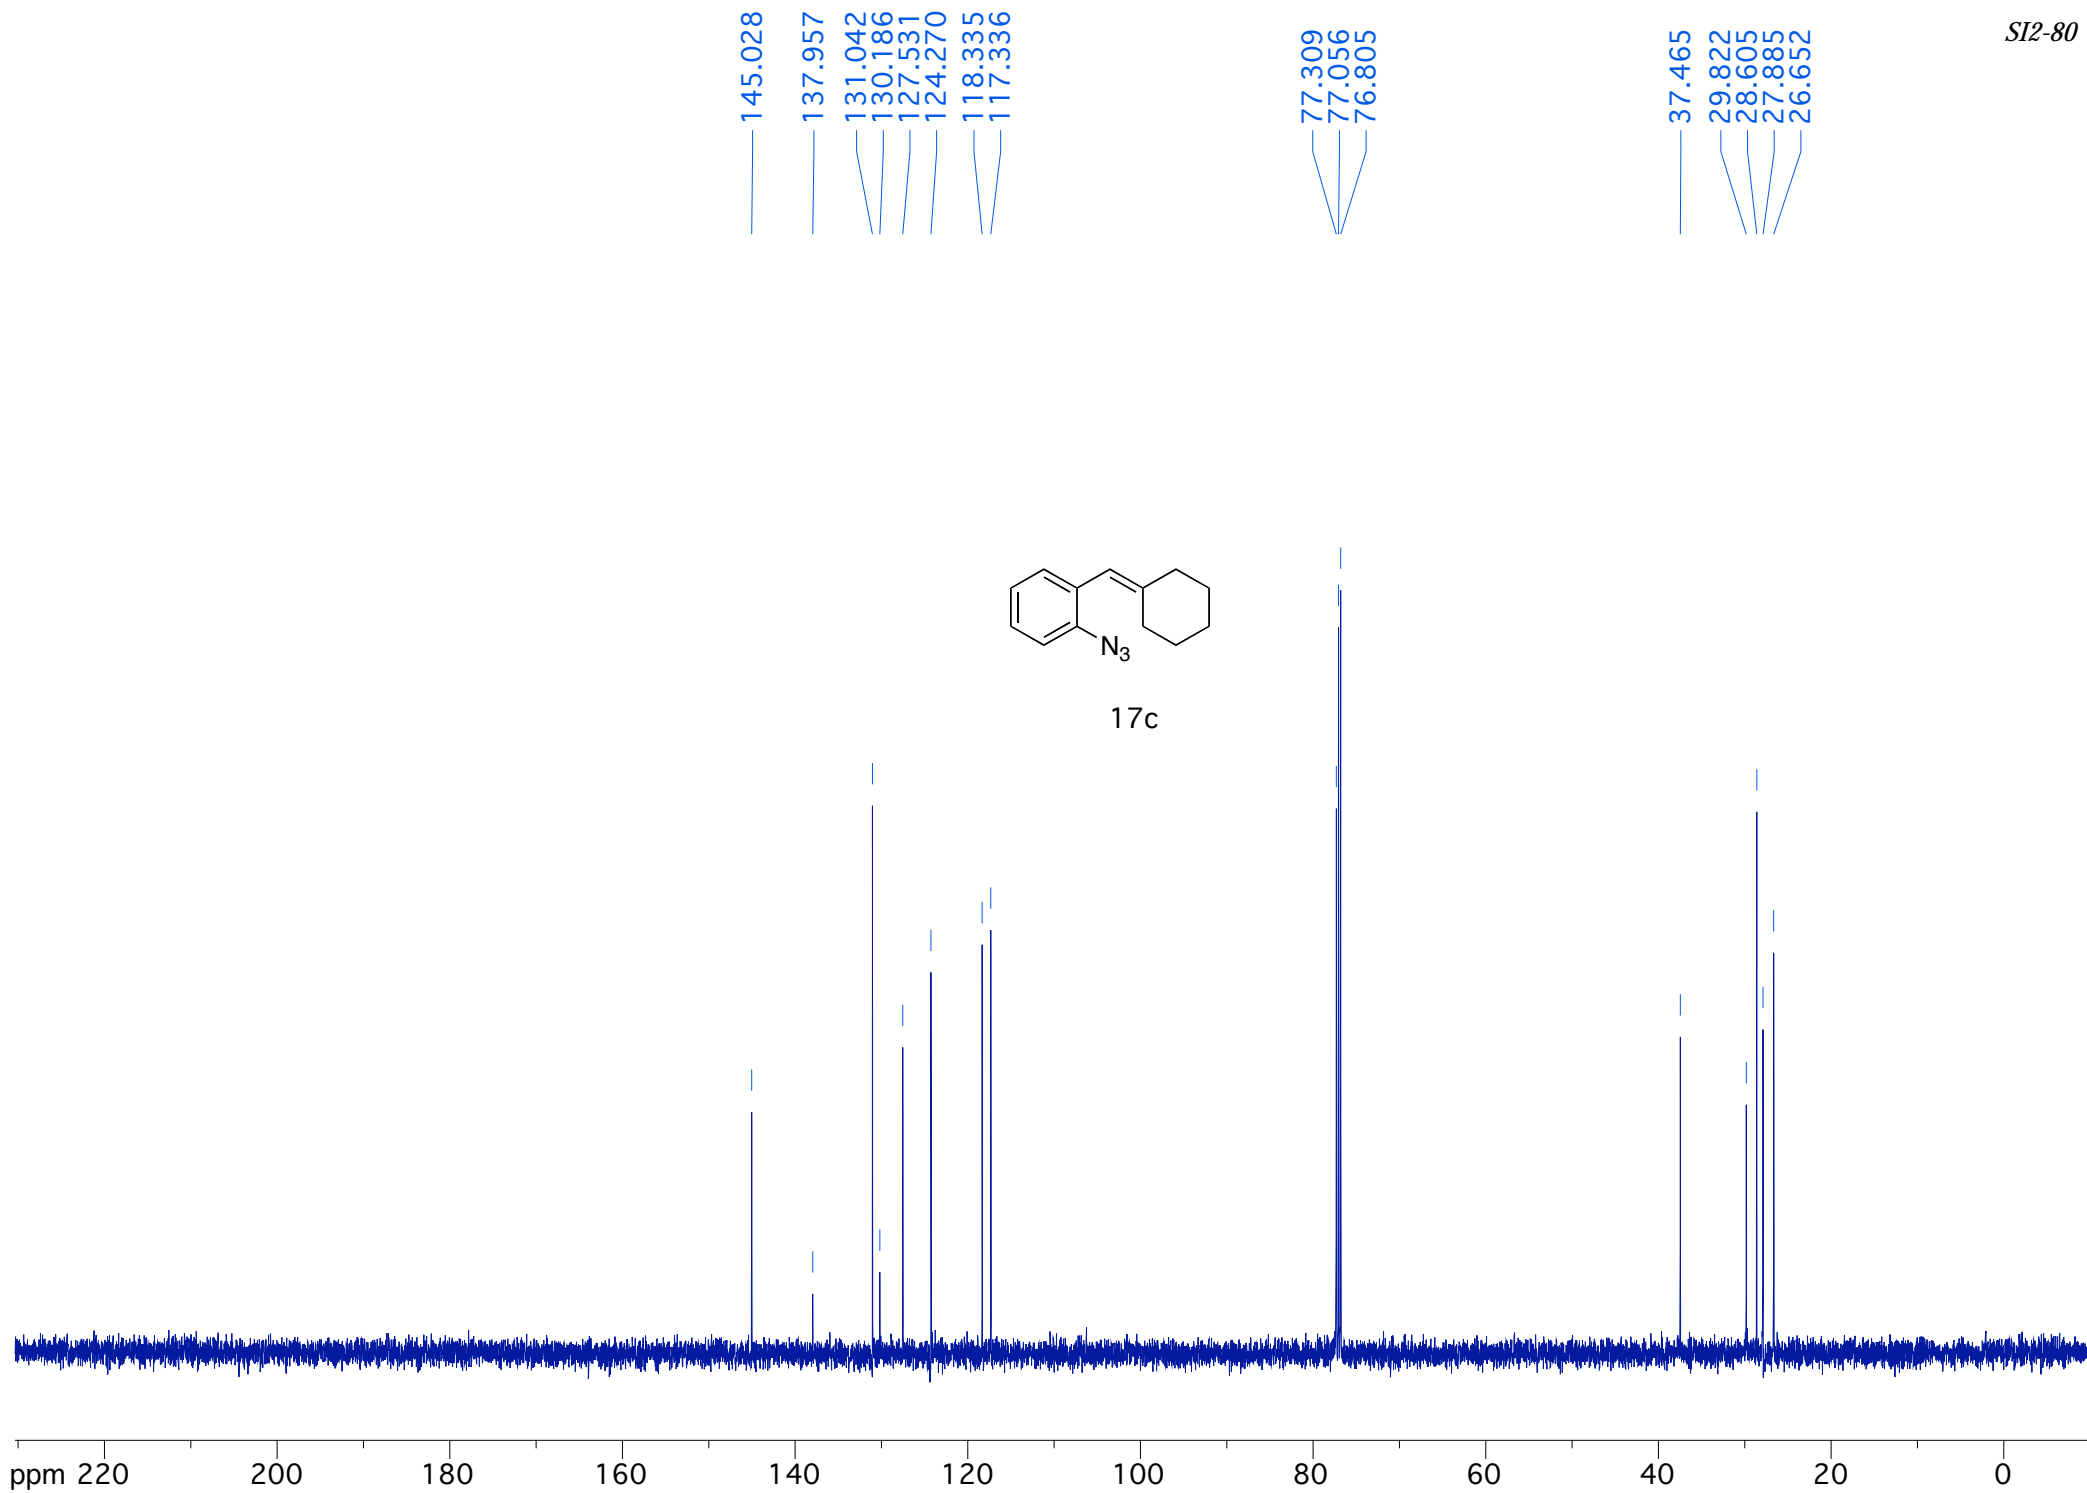



7.261  
7.249  
7.248  
7.233  
7.219  
7.140  
7.125  
7.111  
7.097  
7.081  
6.245

2.458  
2.447  
2.435  
2.385  
2.374  
2.362  
1.698  
1.637  
1.625  
1.600  
1.587  
1.578

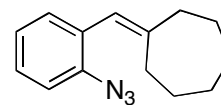

17d

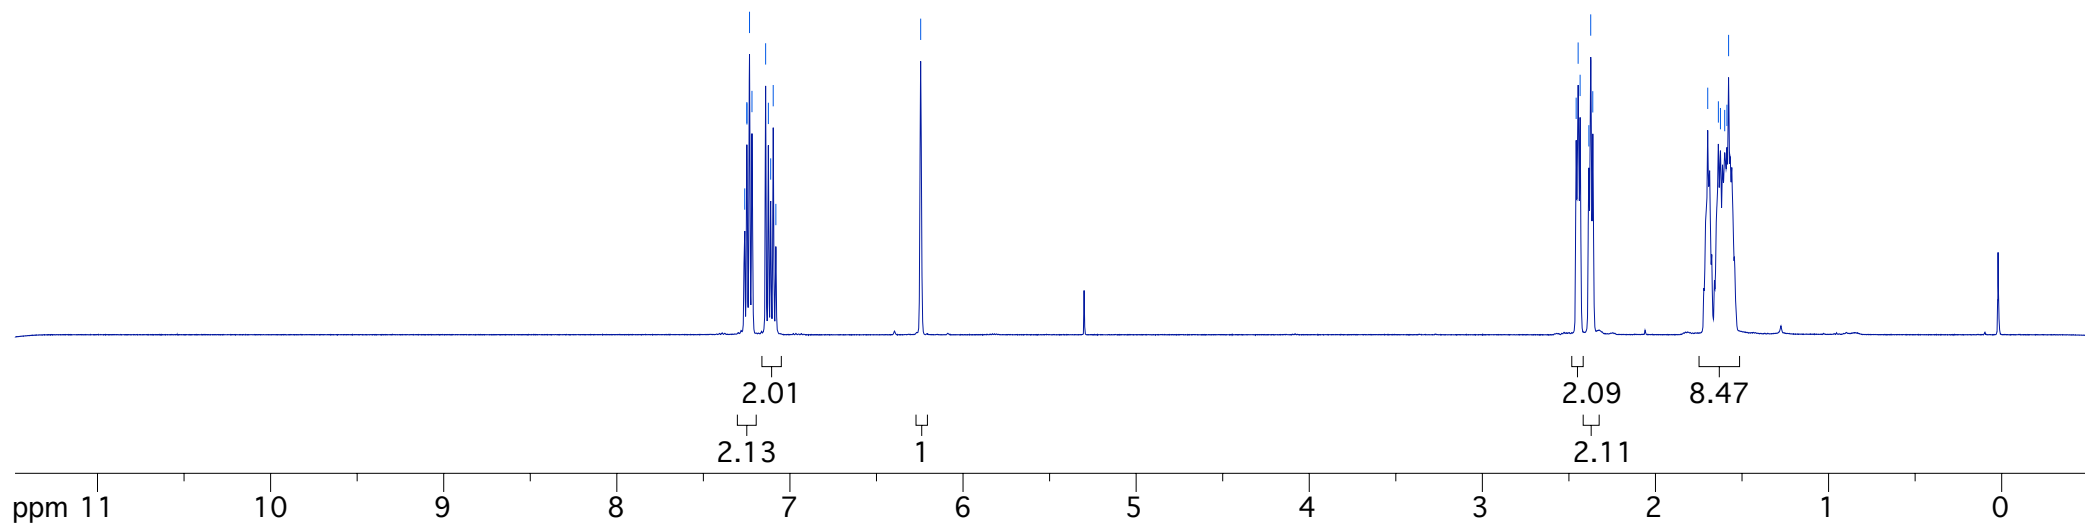

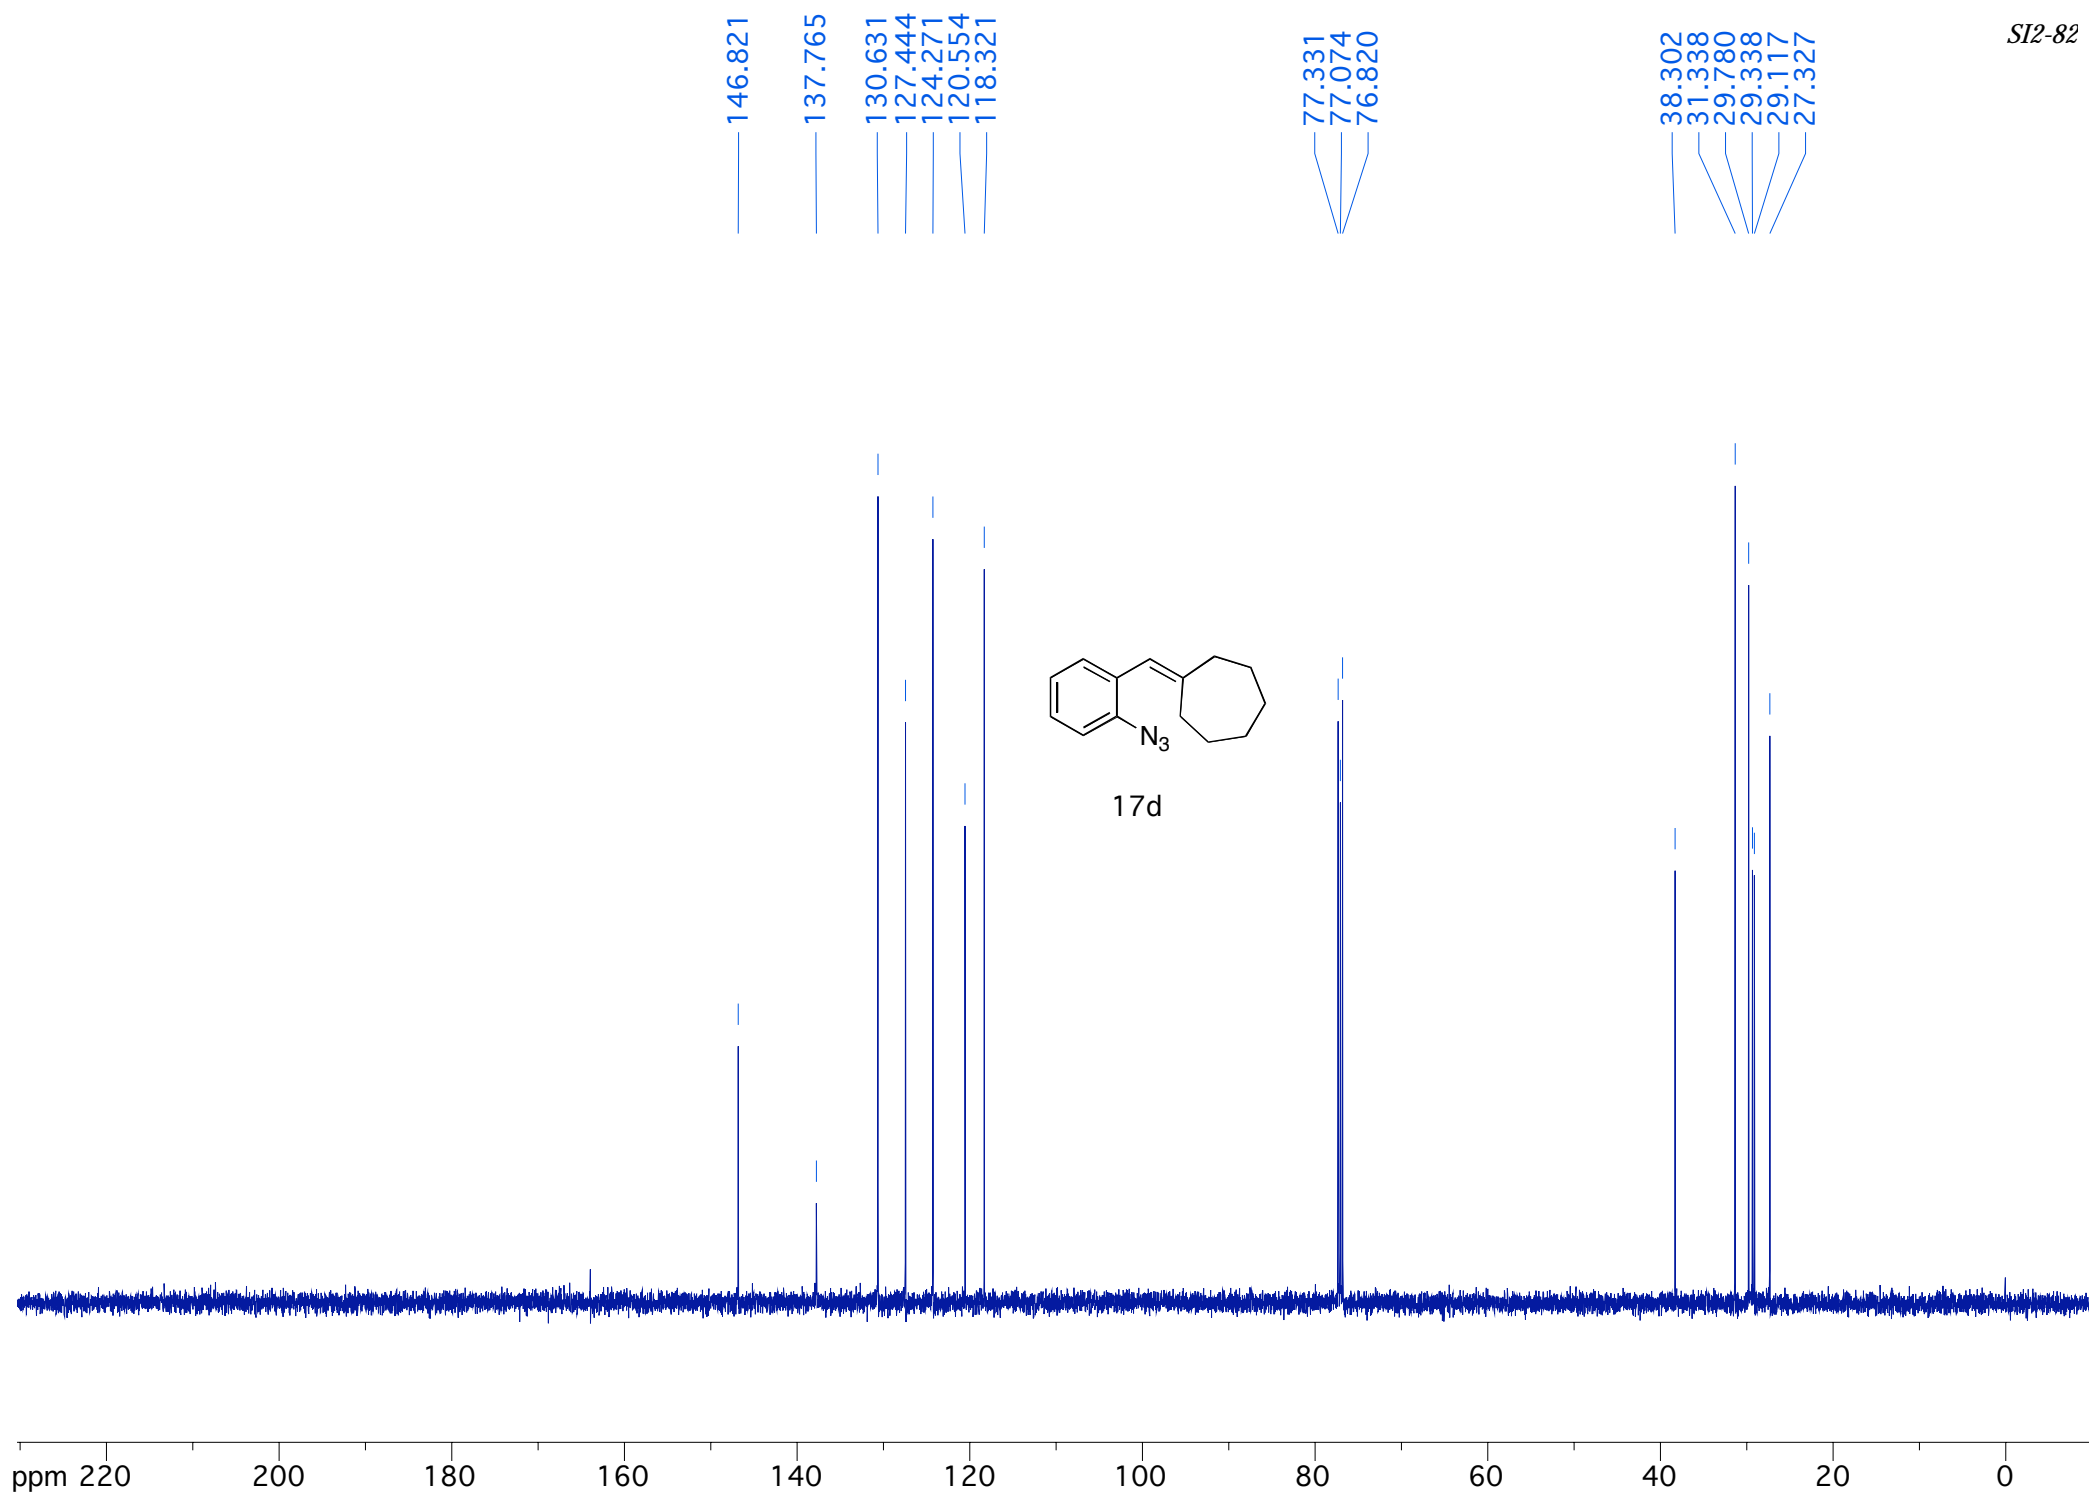

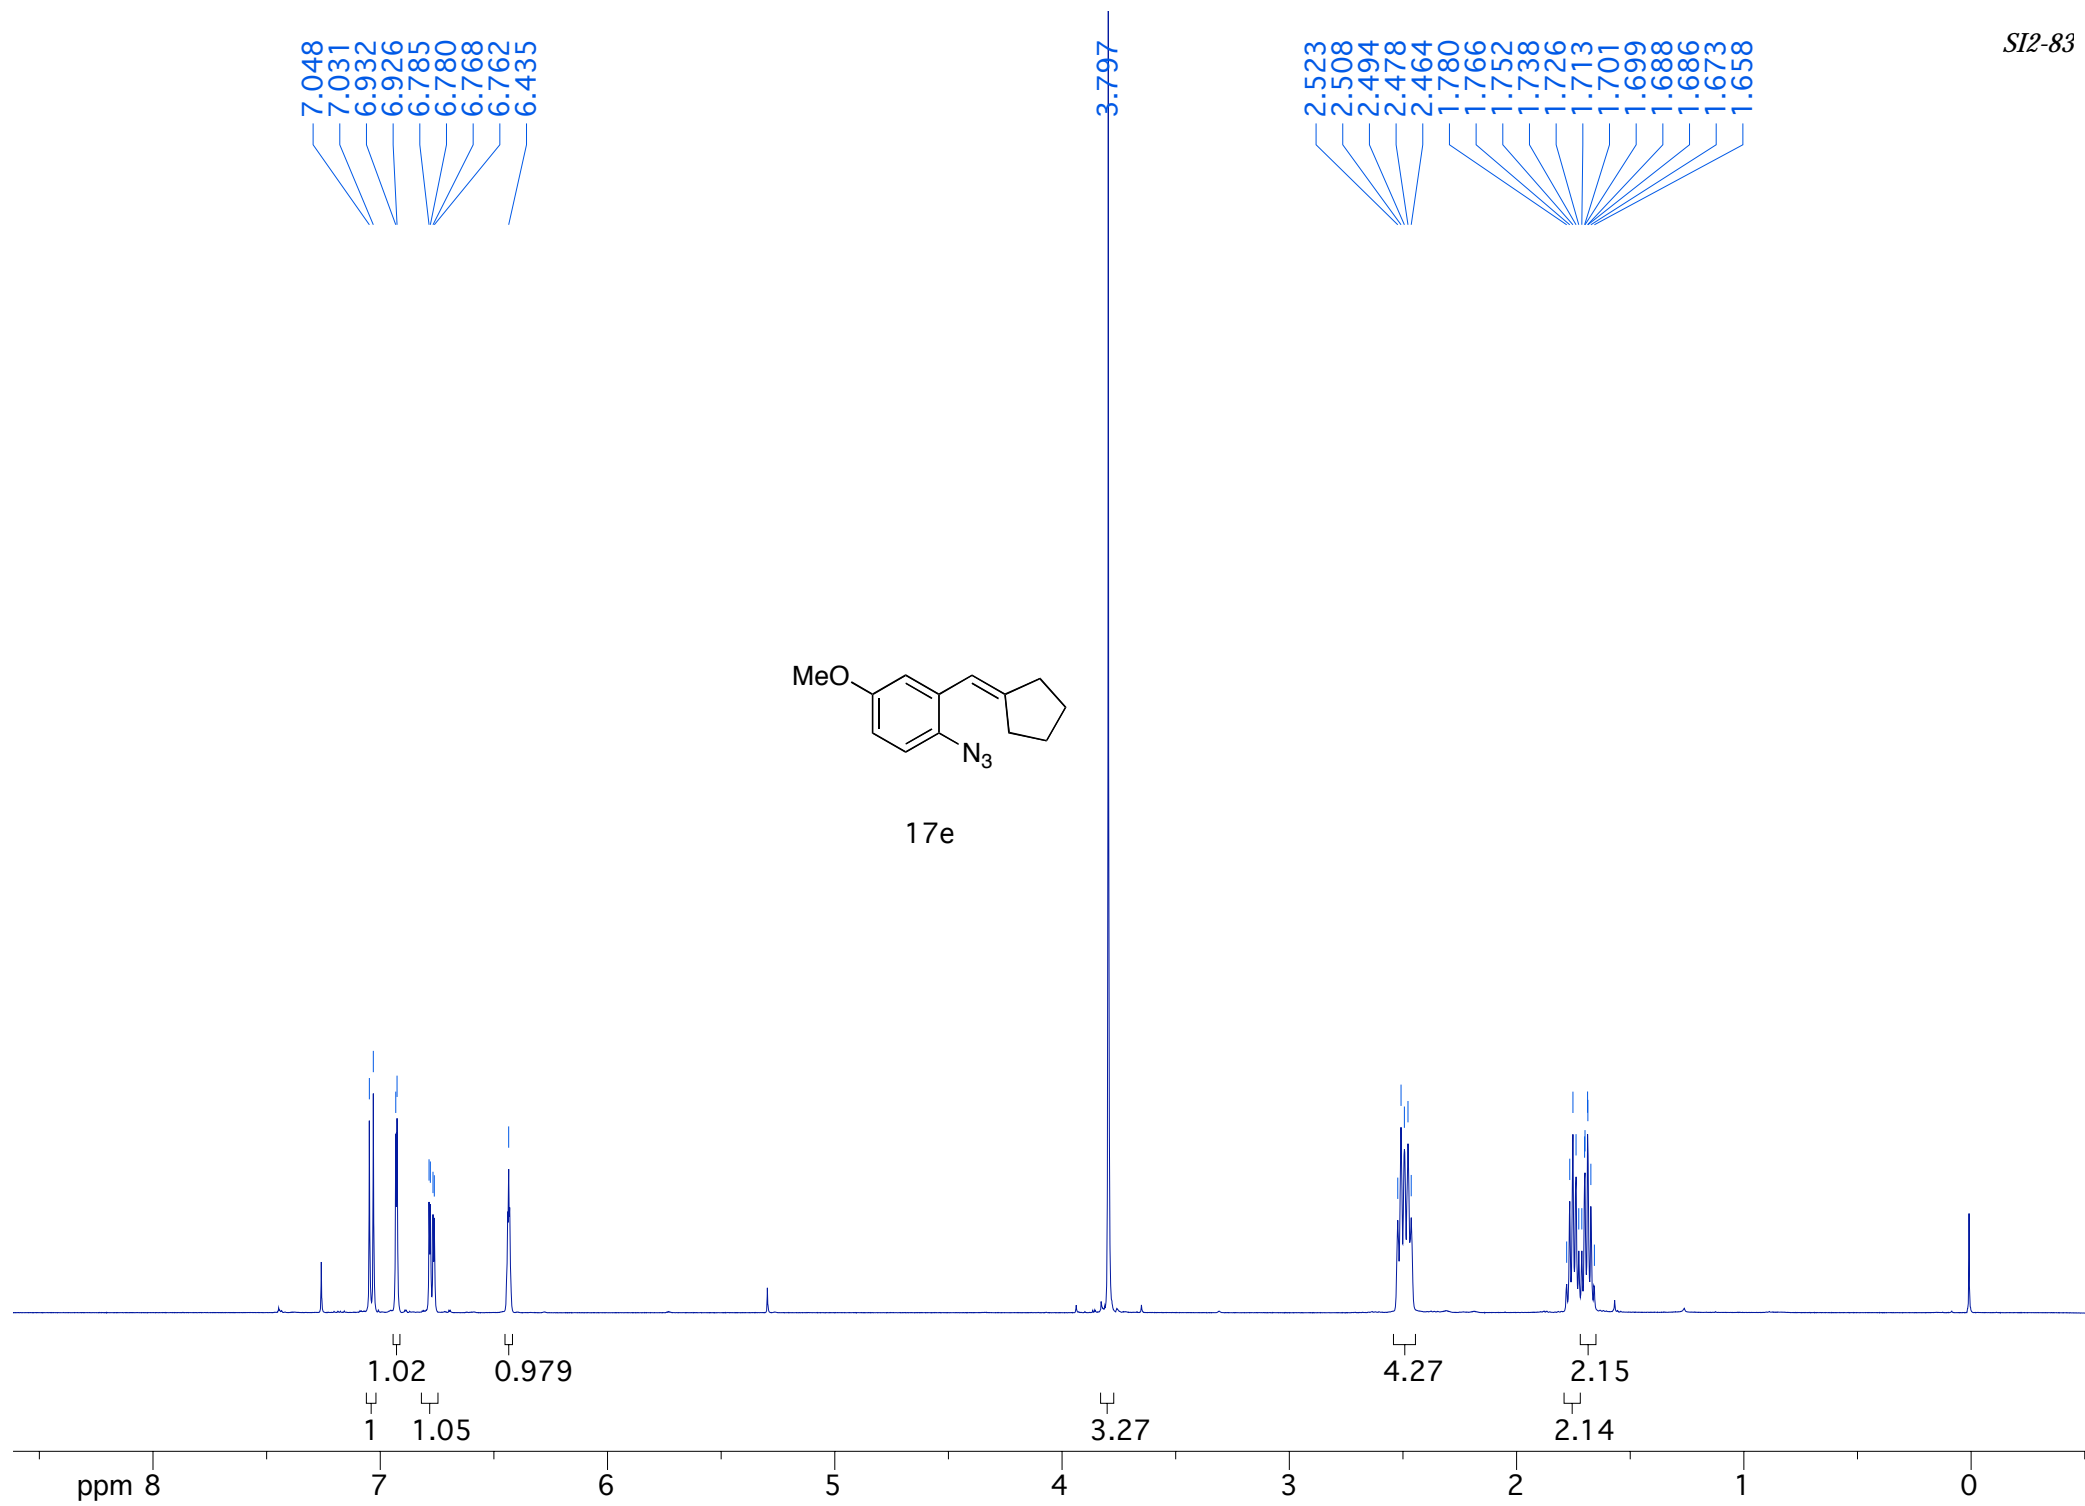

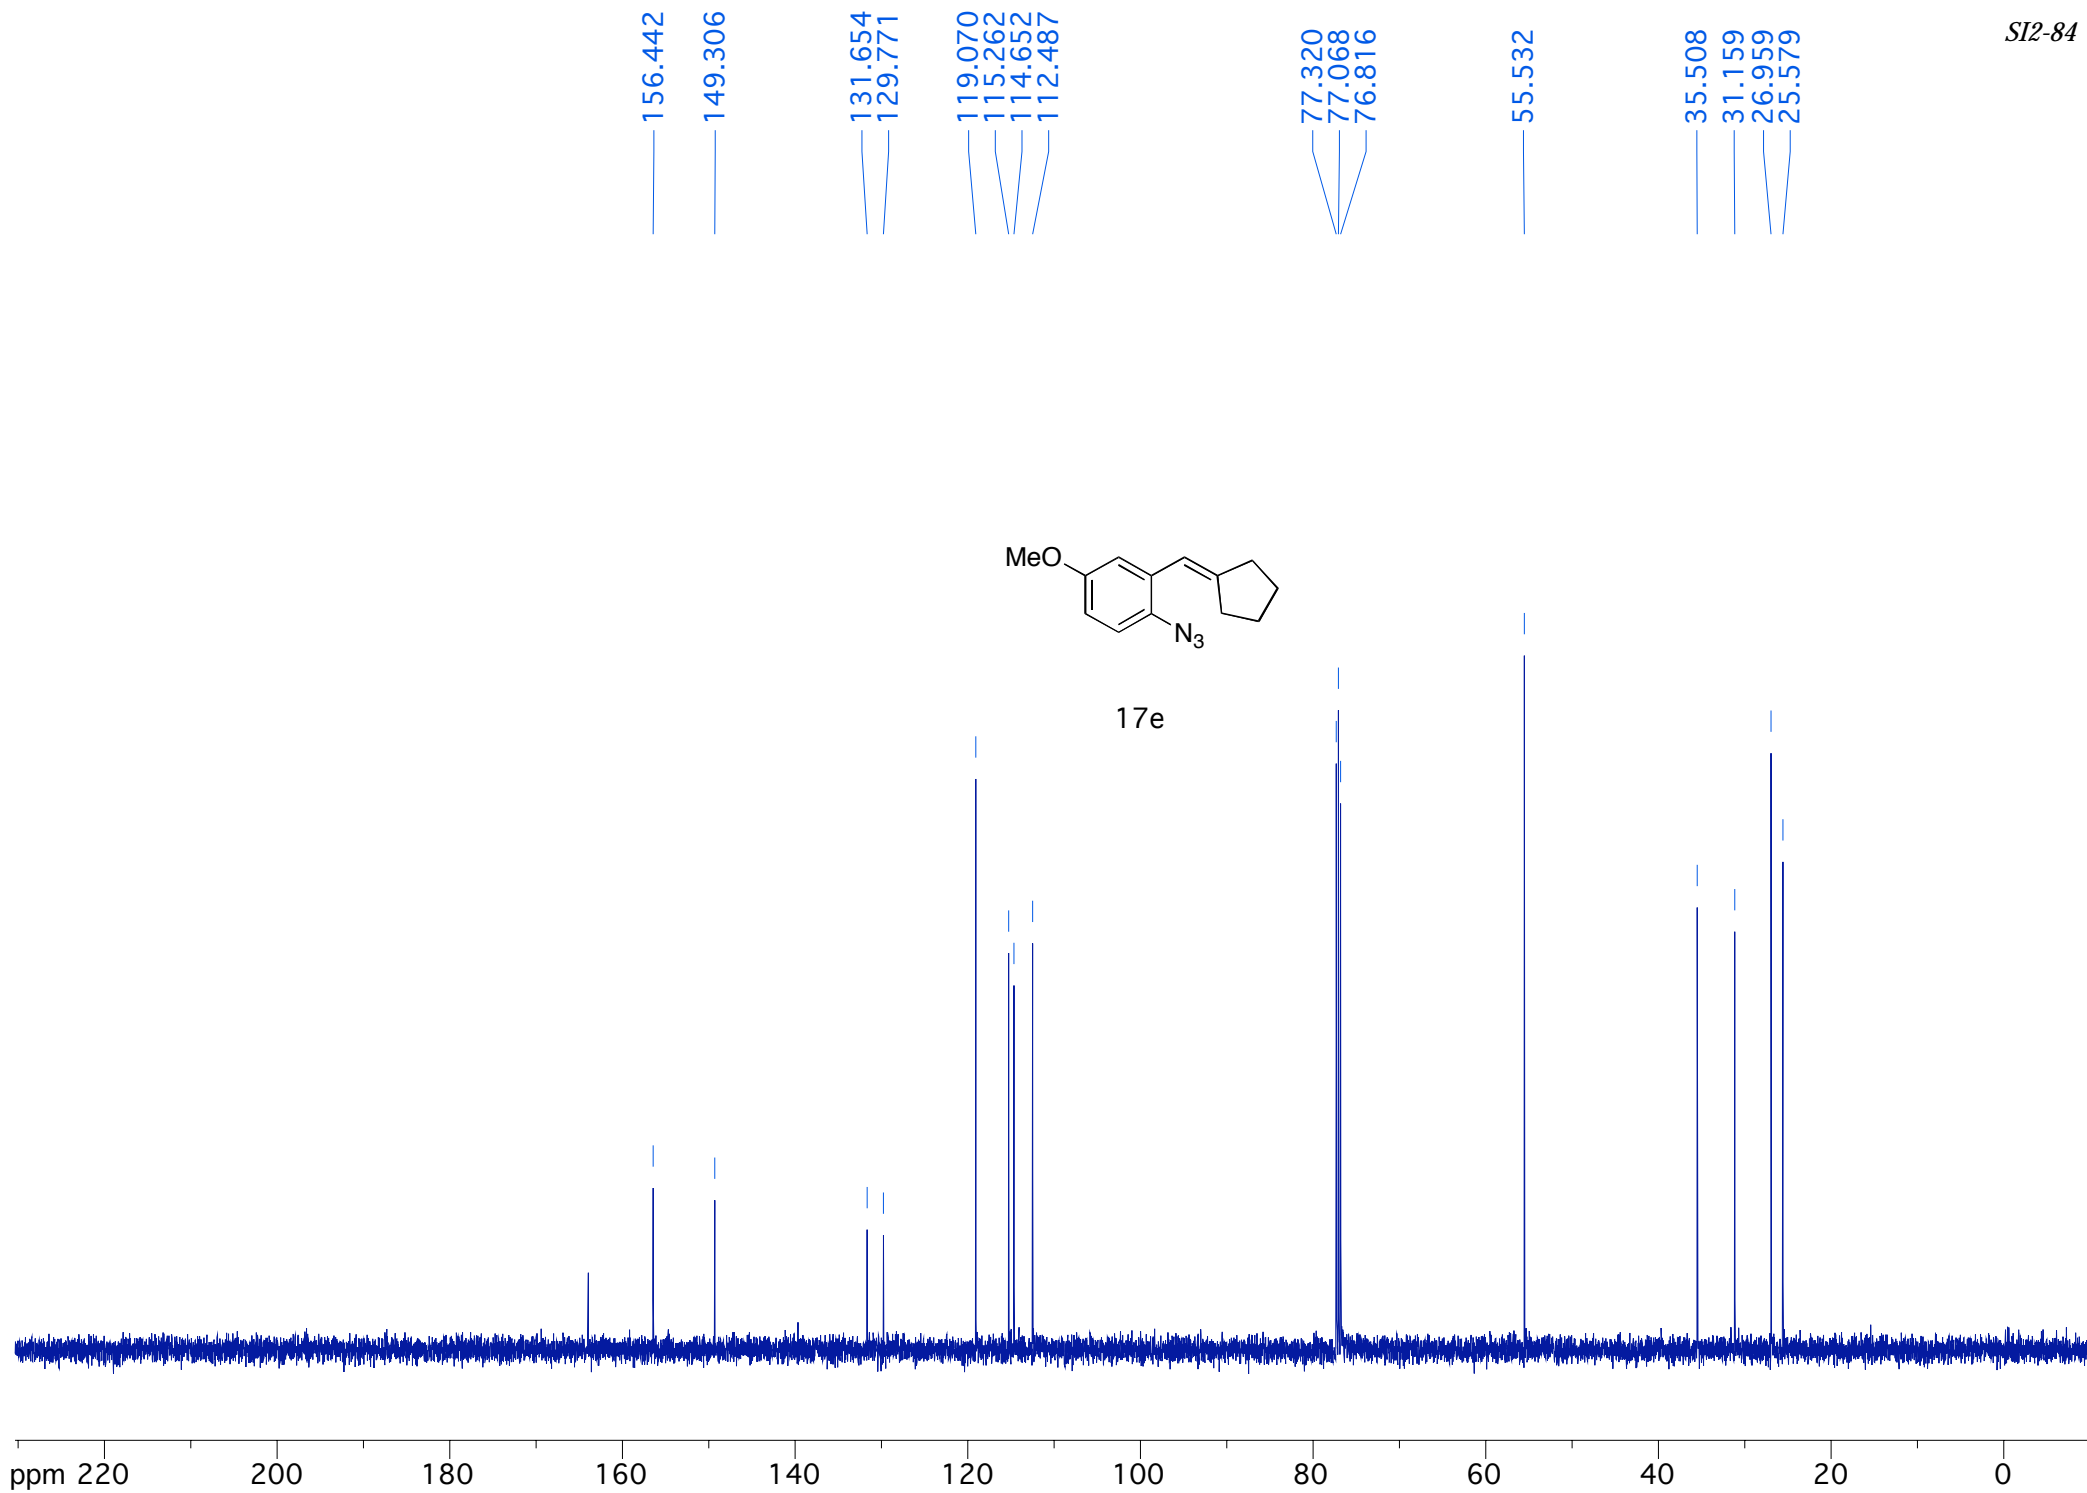

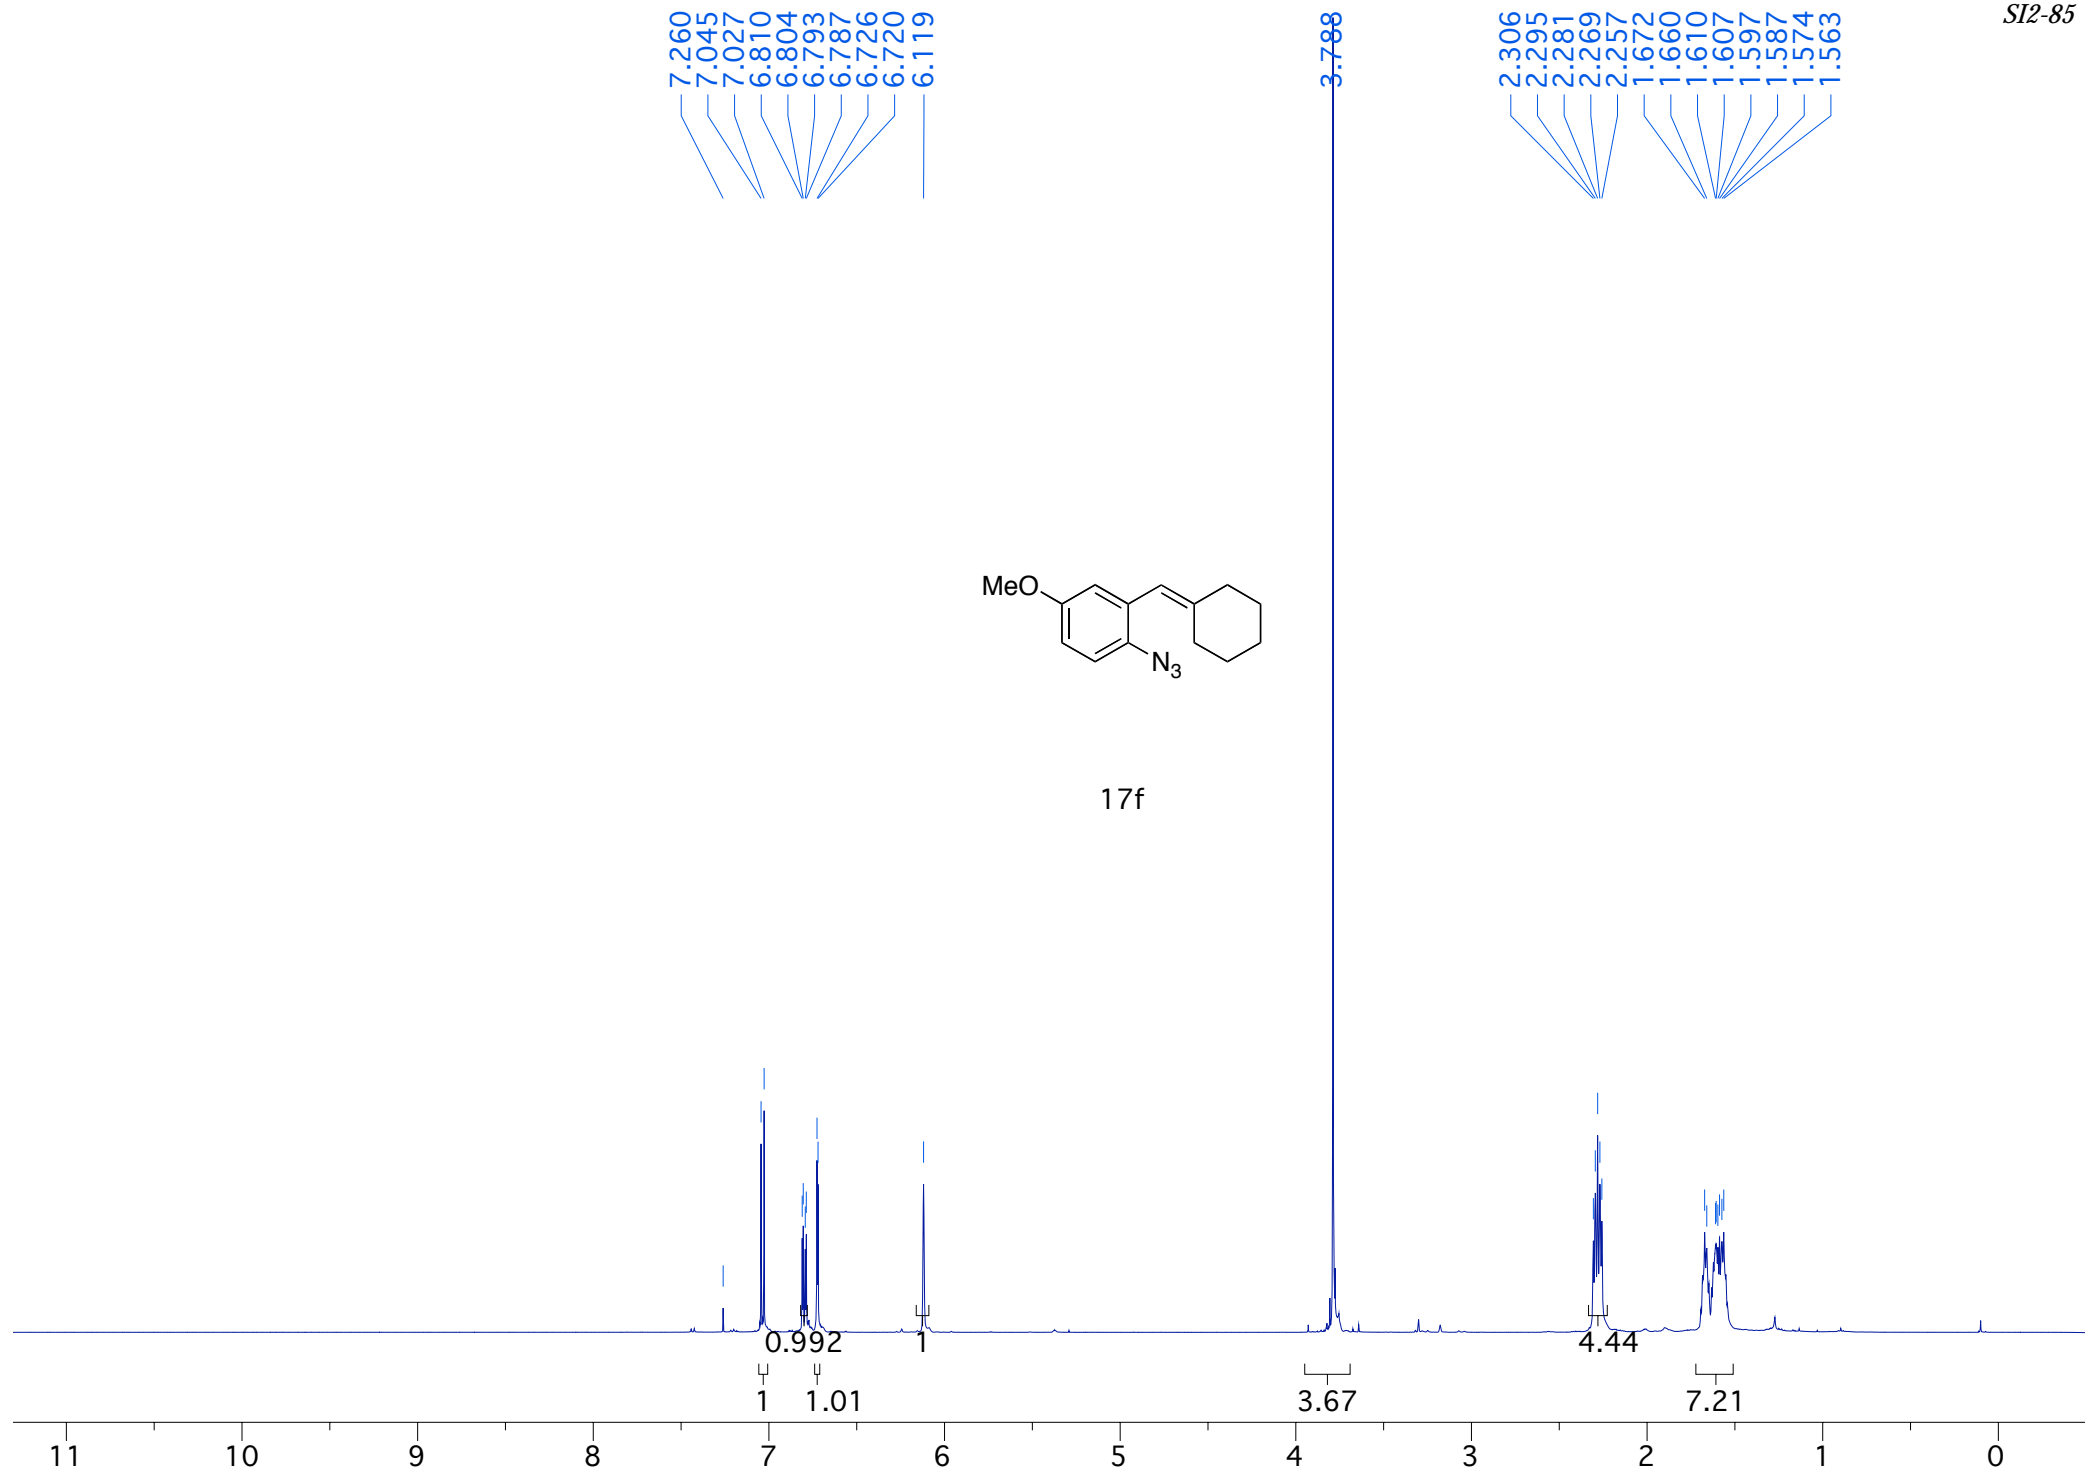

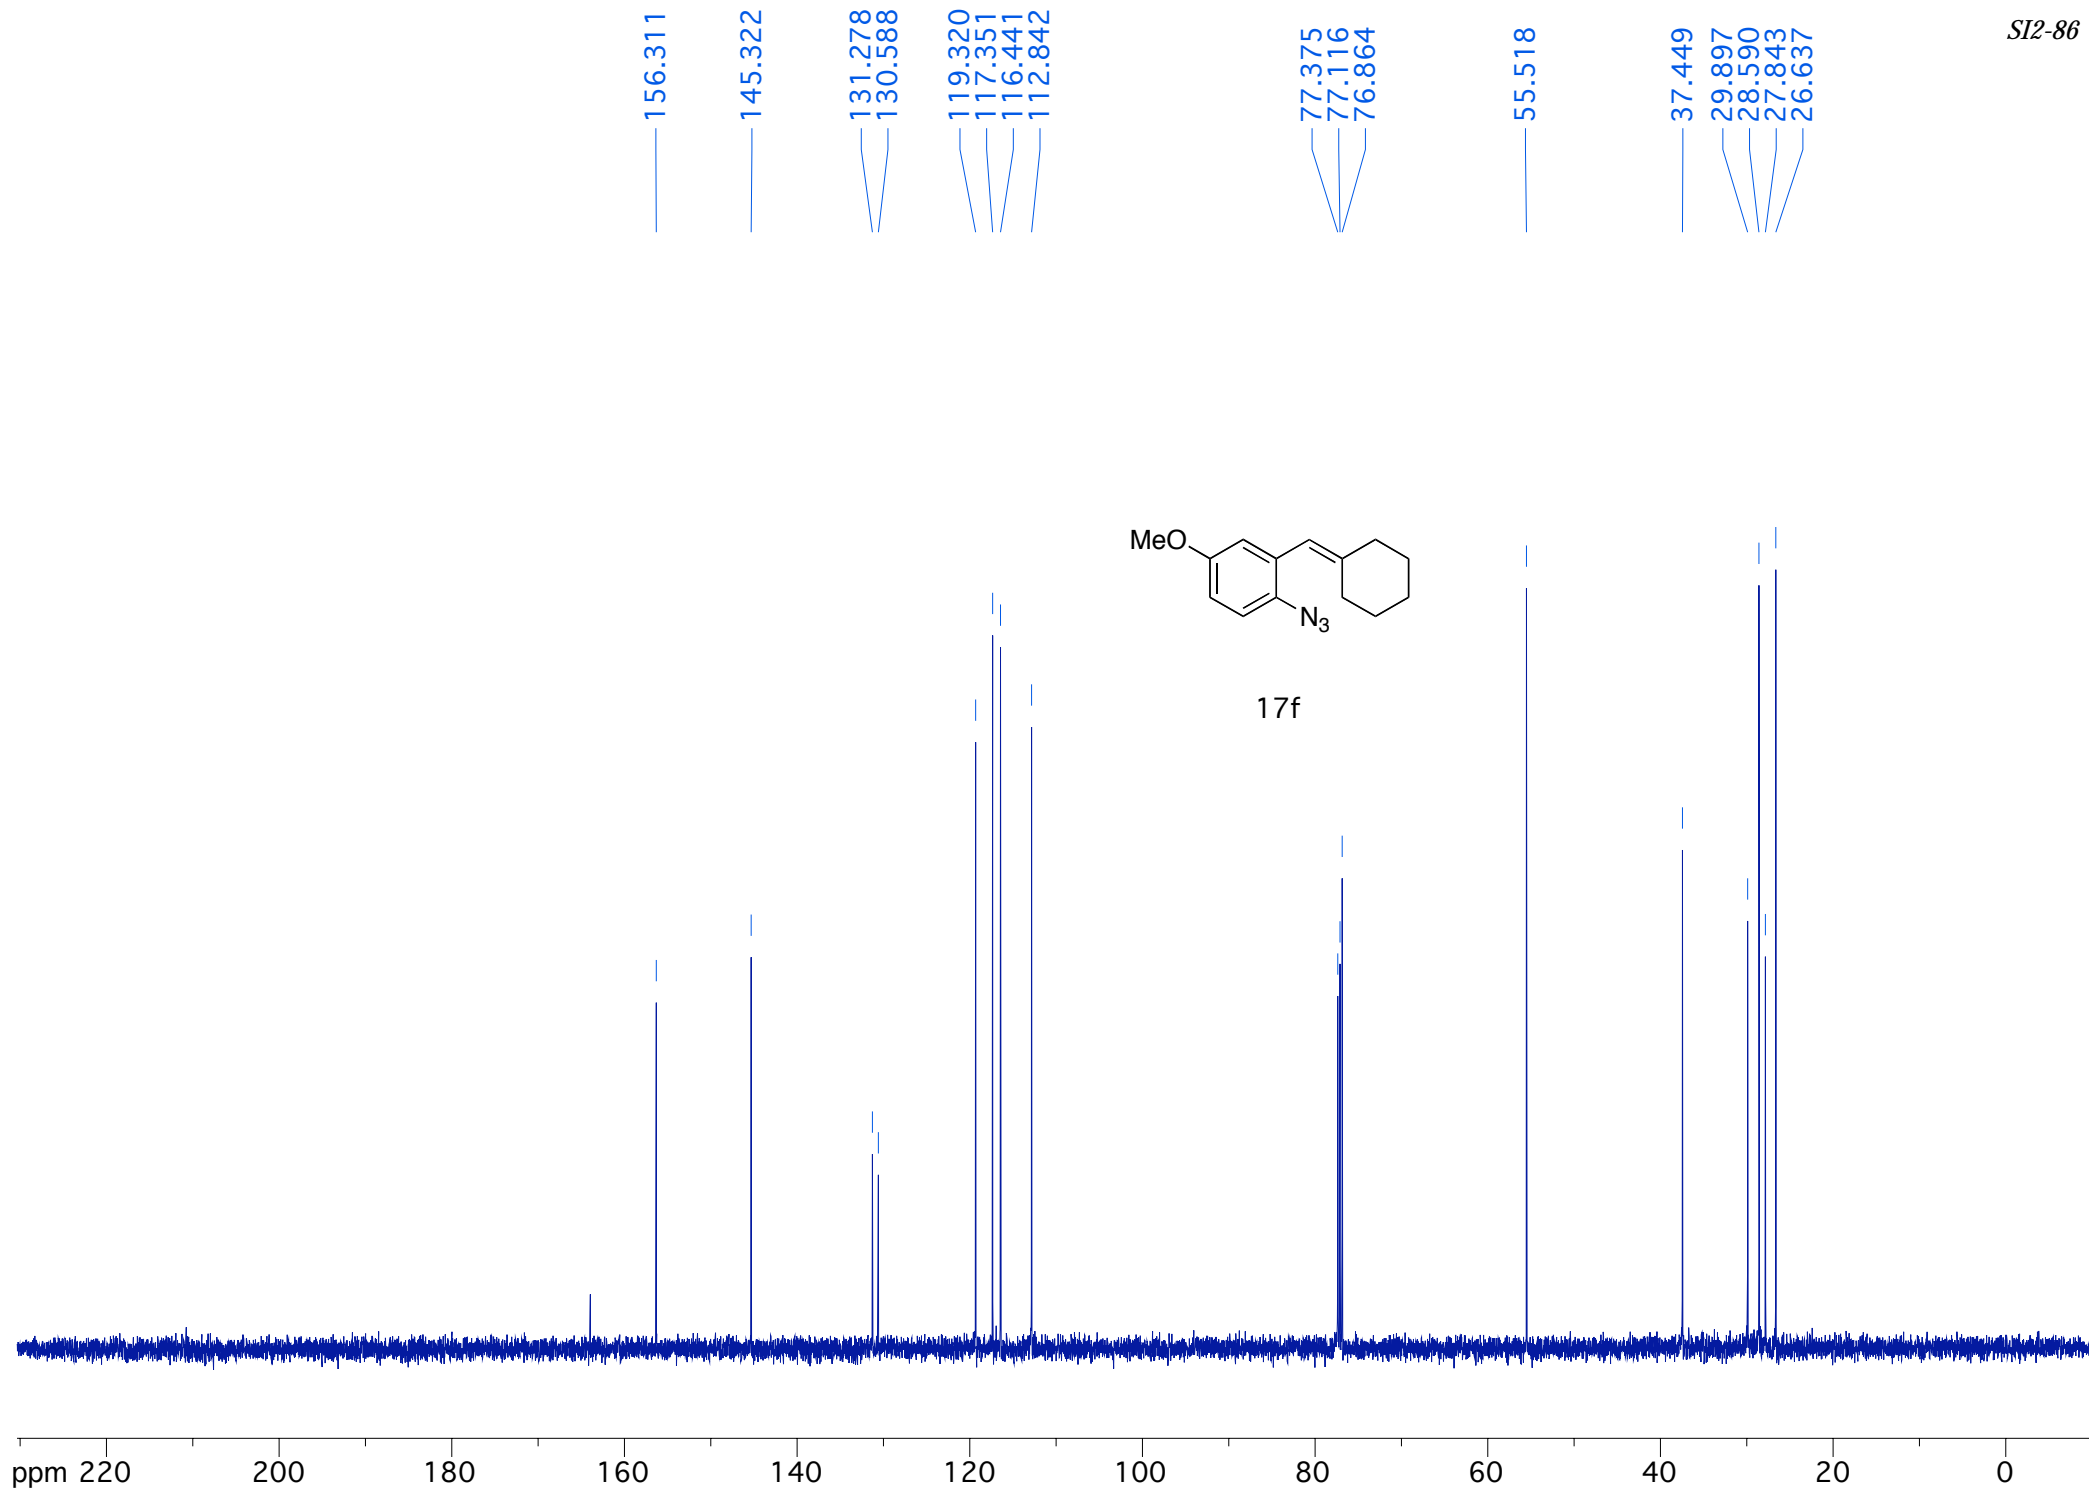

7.496  
7.492  
7.479  
7.475  
7.402  
7.260  
7.206  
7.190

6.109

2.313  
2.302  
2.291  
2.232  
2.221  
2.210  
1.696  
1.687  
1.675  
1.665  
1.663  
1.651  
1.635  
1.626  
1.614  
1.609  
1.600  
1.590  
1.586  
1.573  
1.559  
1.550  
1.541

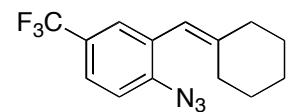

17g

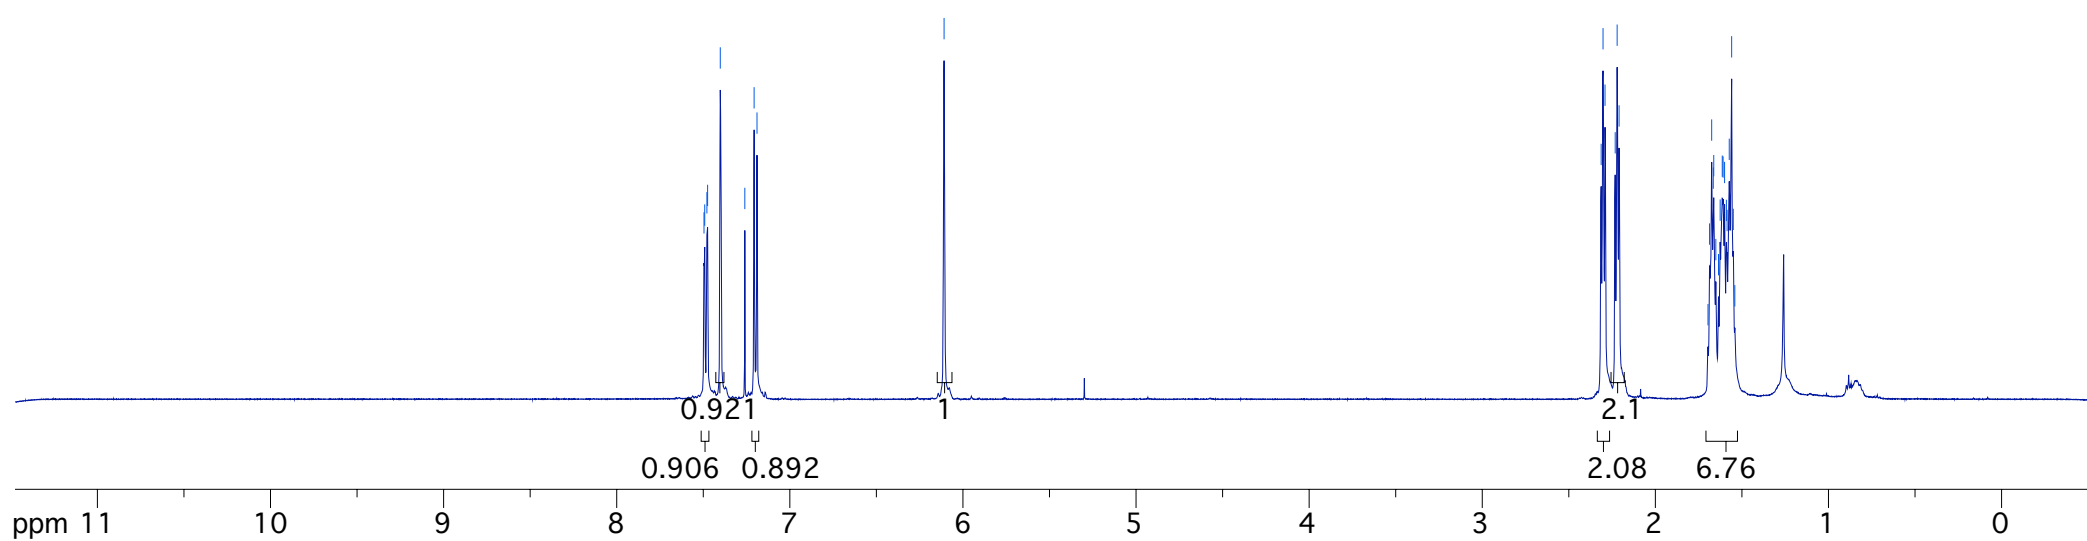

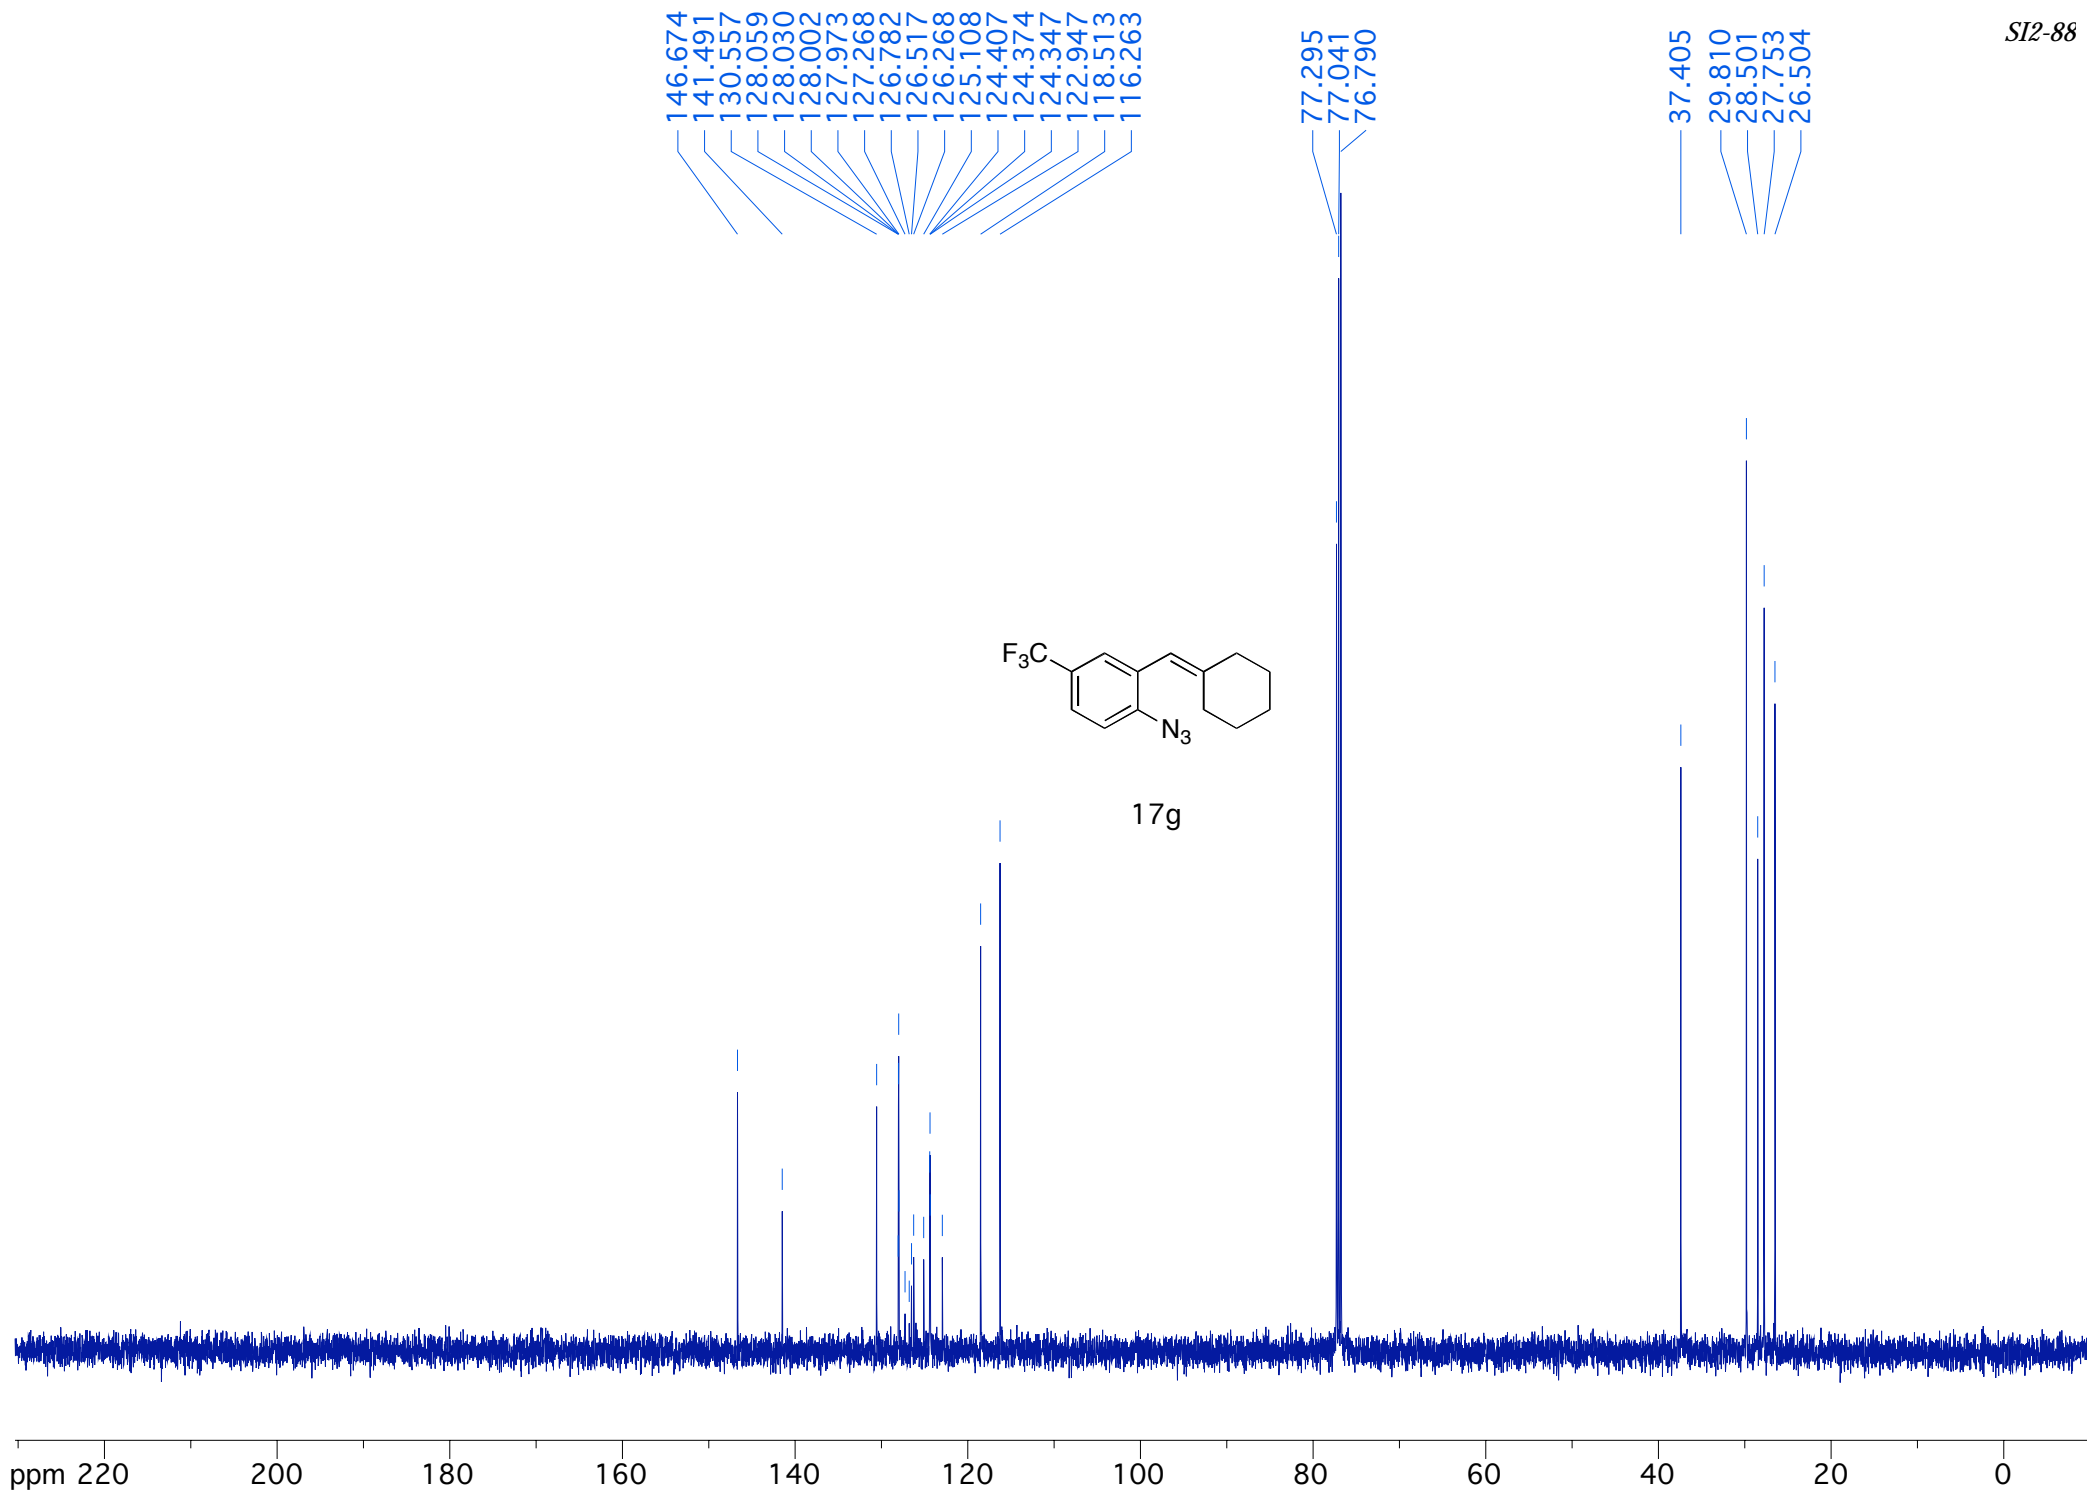



7.958  
7.943  
7.941  
7.880  
7.865  
7.398  
7.395  
7.383  
7.380  
7.368  
7.365  
7.359  
7.356  
7.346  
7.342  
7.310  
7.295  
7.260  
7.238  
7.235  
7.221  
7.207  
7.196  
7.193  
7.182  
7.179

2.958  
2.943  
2.928  
2.779  
2.772  
2.767  
2.762  
2.755  
2.287  
2.272  
2.263  
2.260  
2.258  
2.248  
2.233

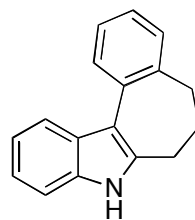

9

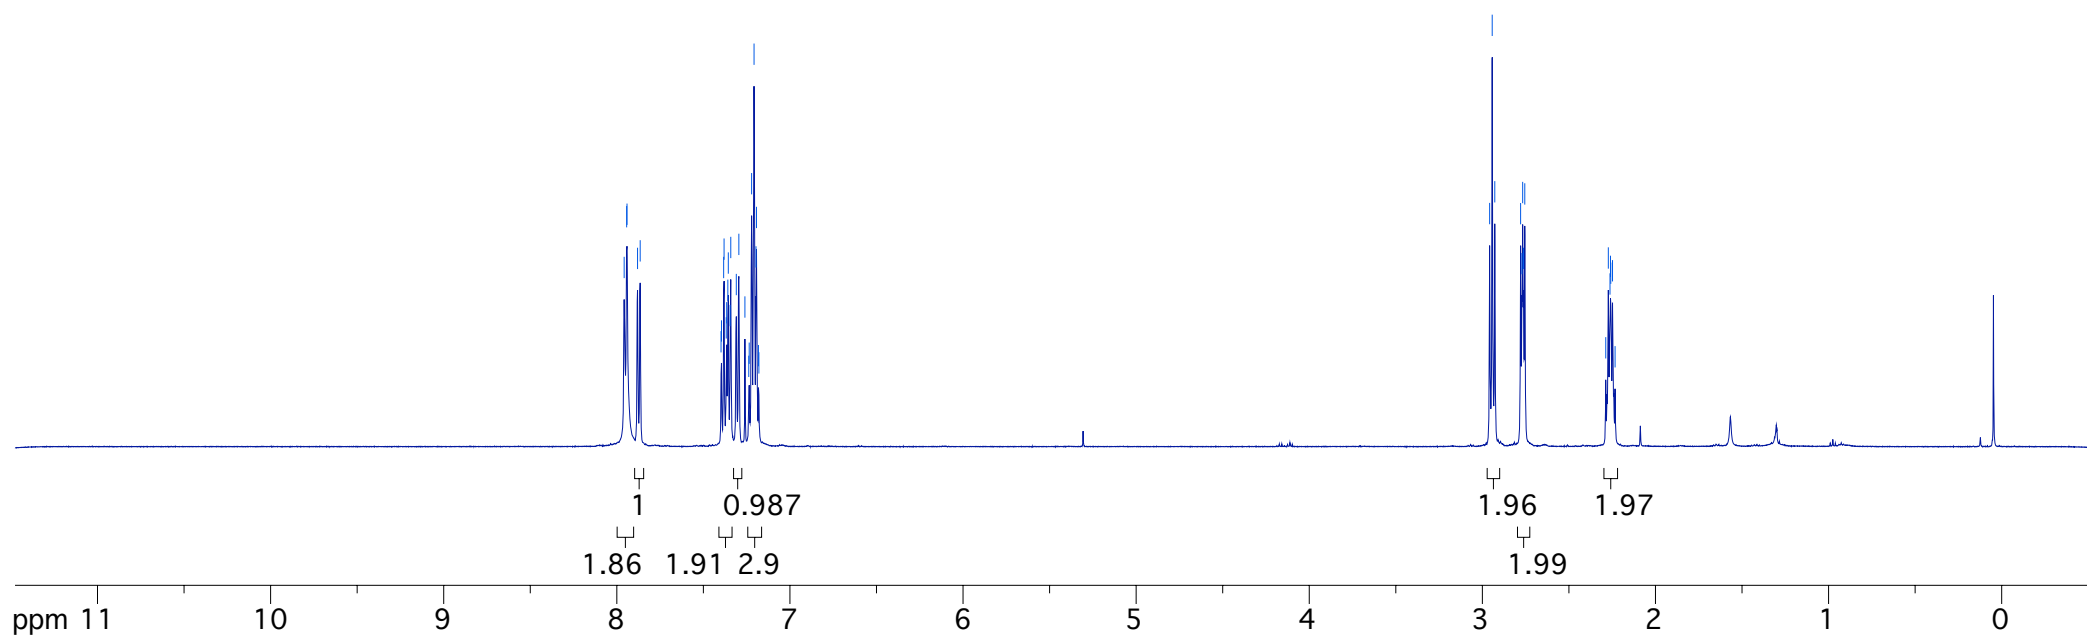

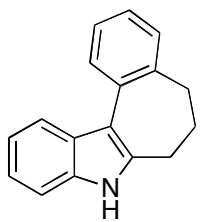

9

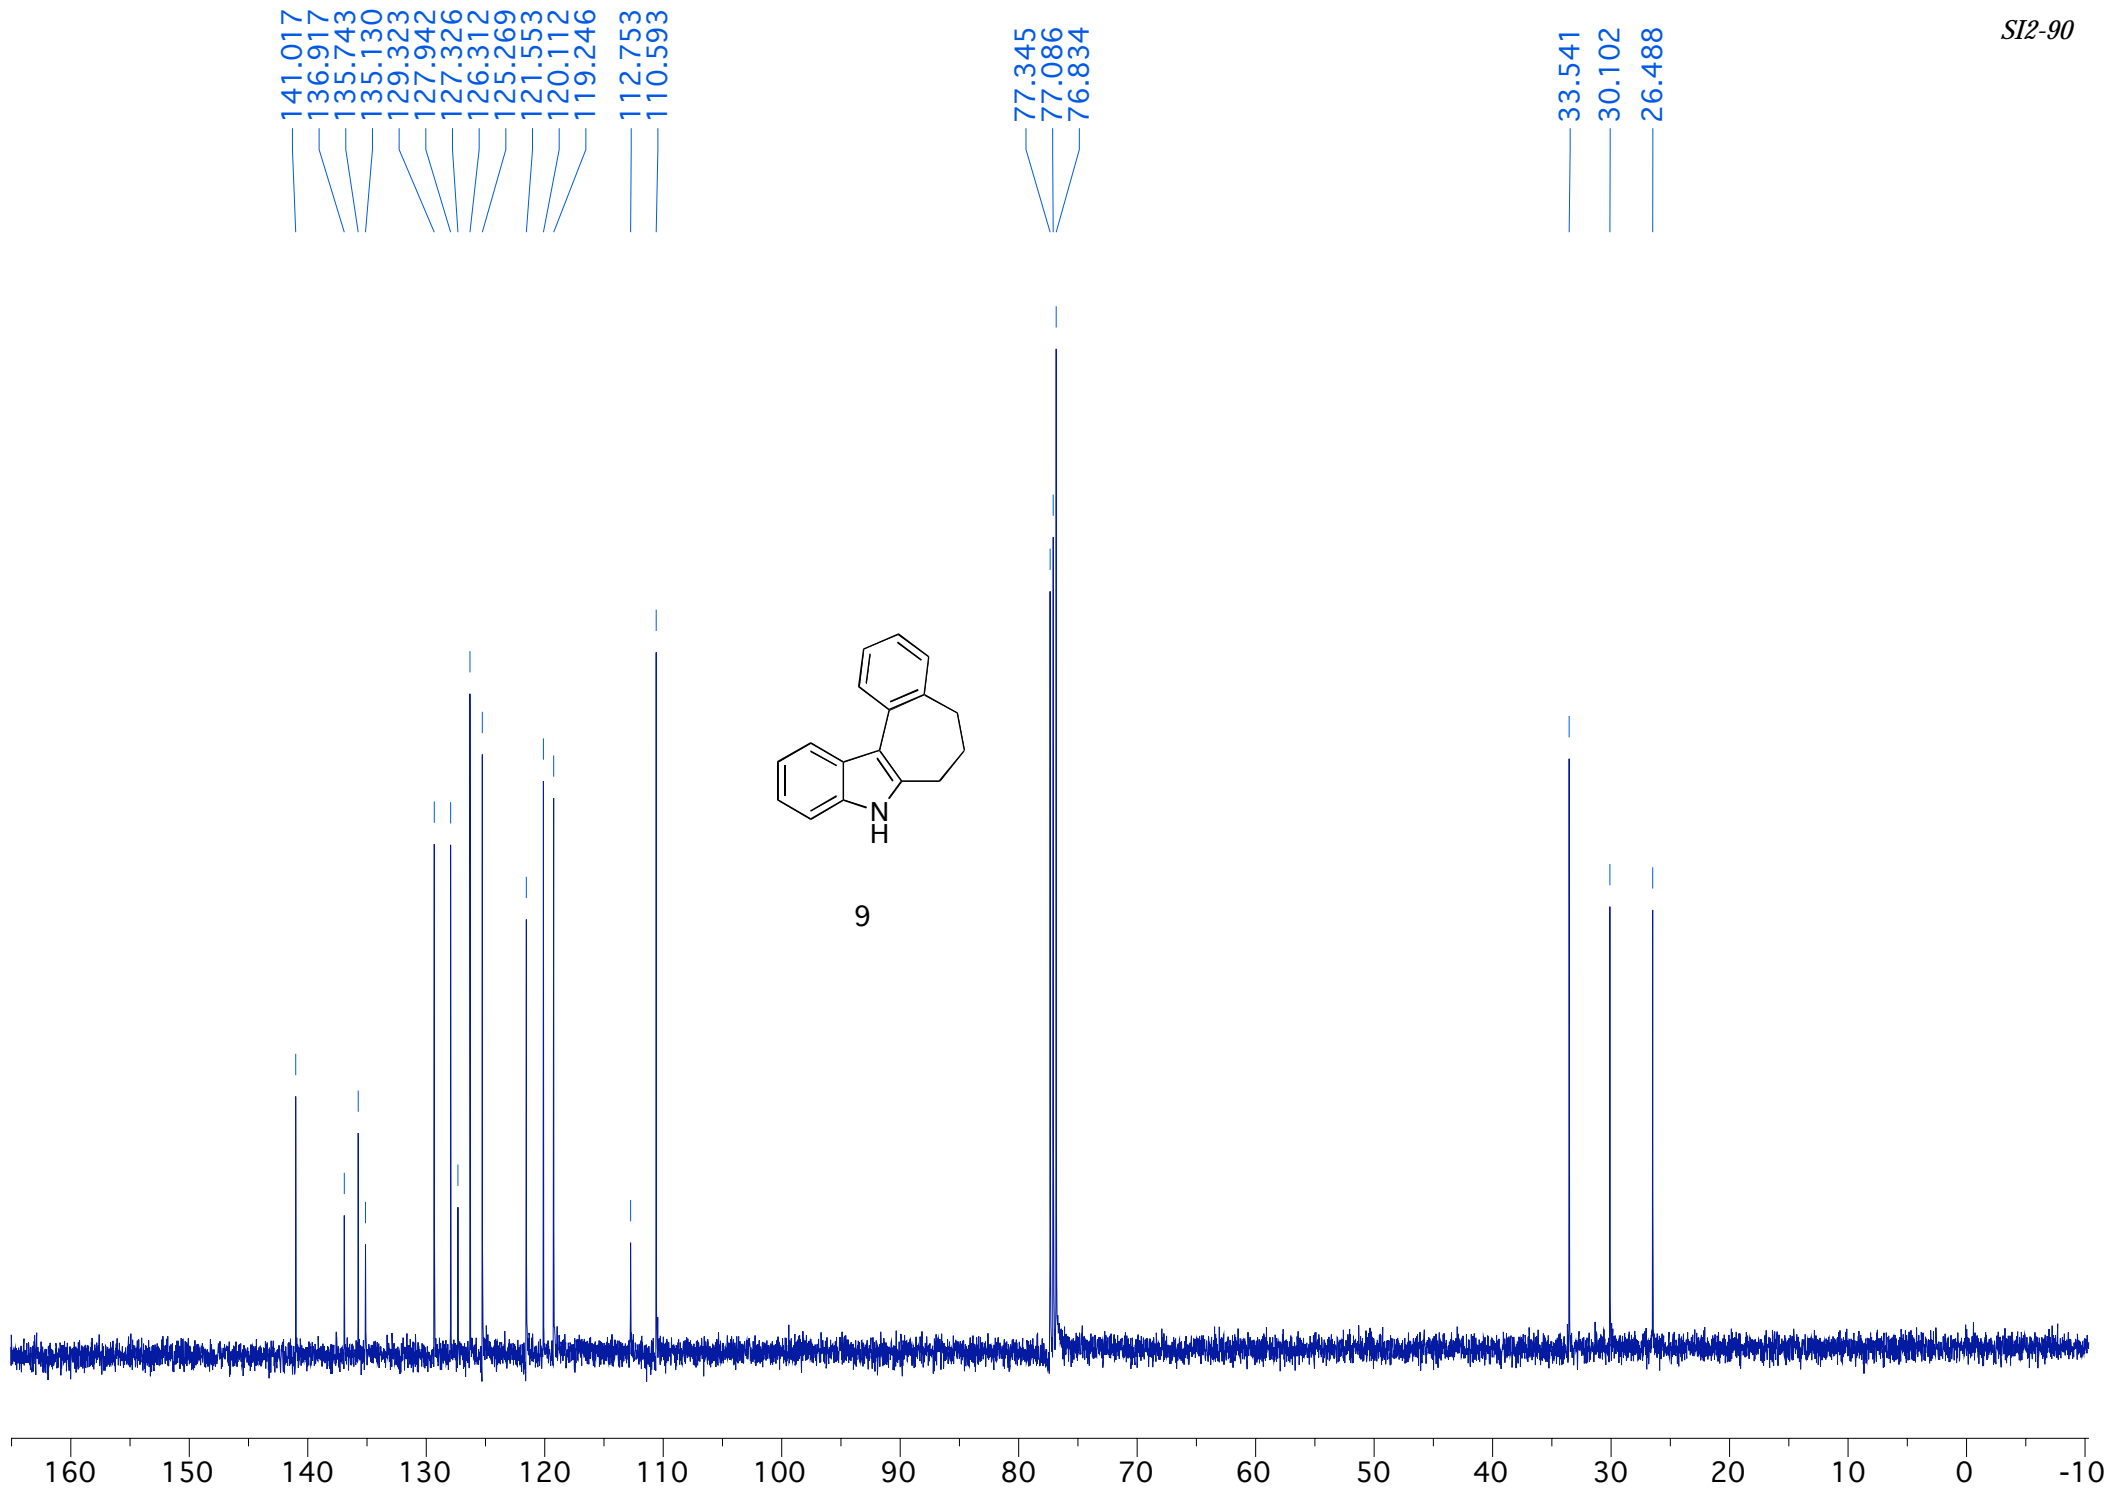

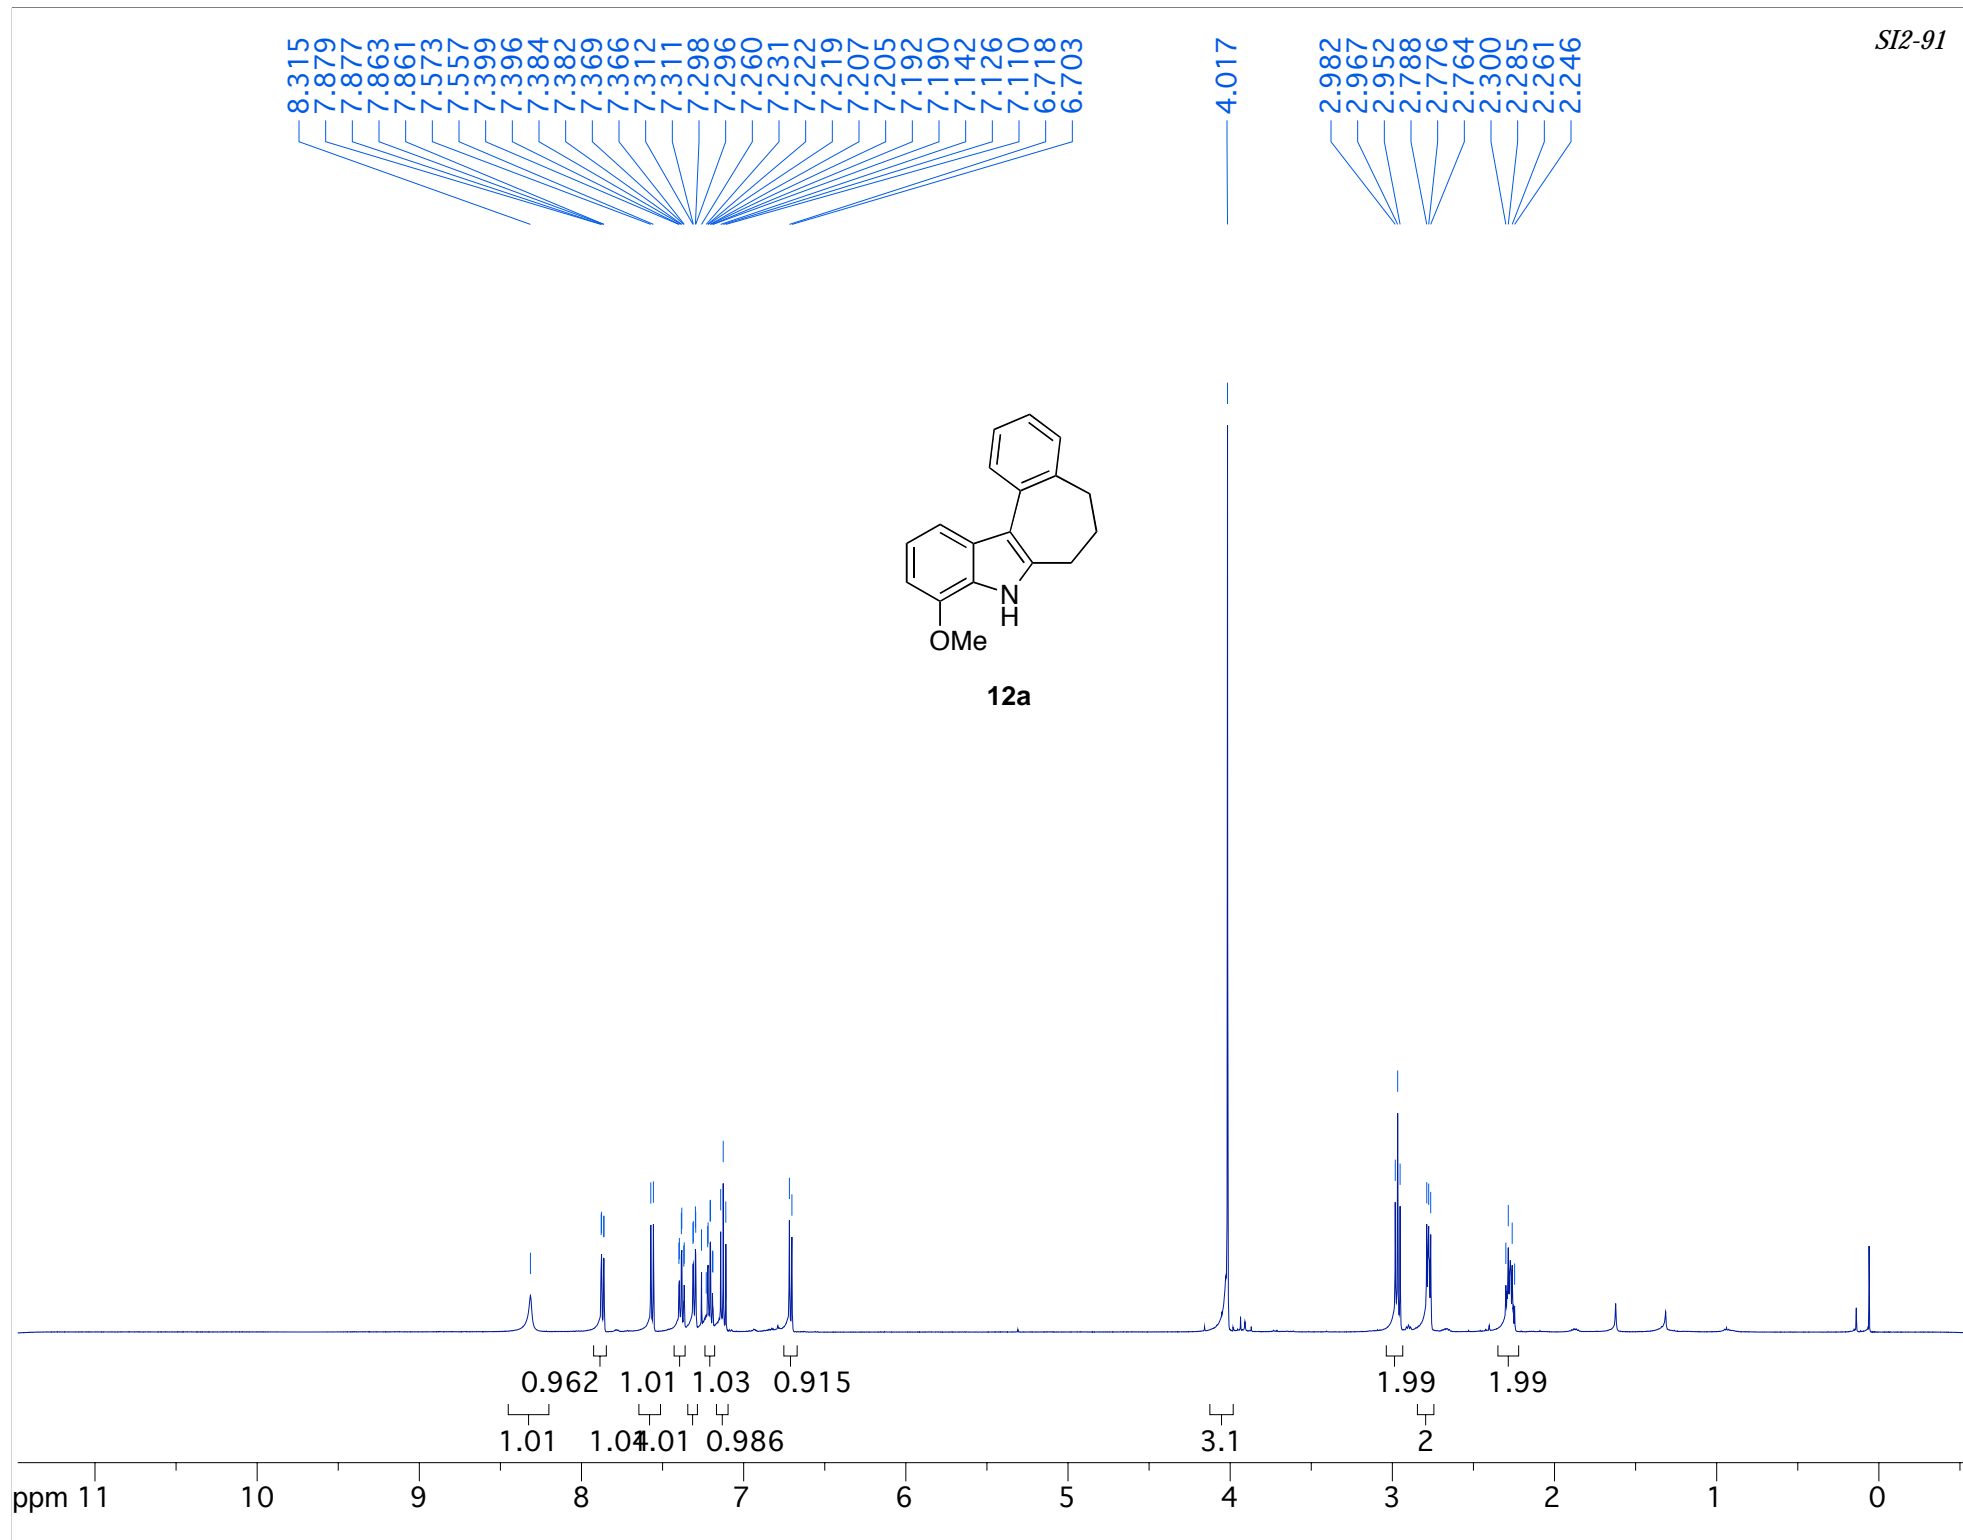

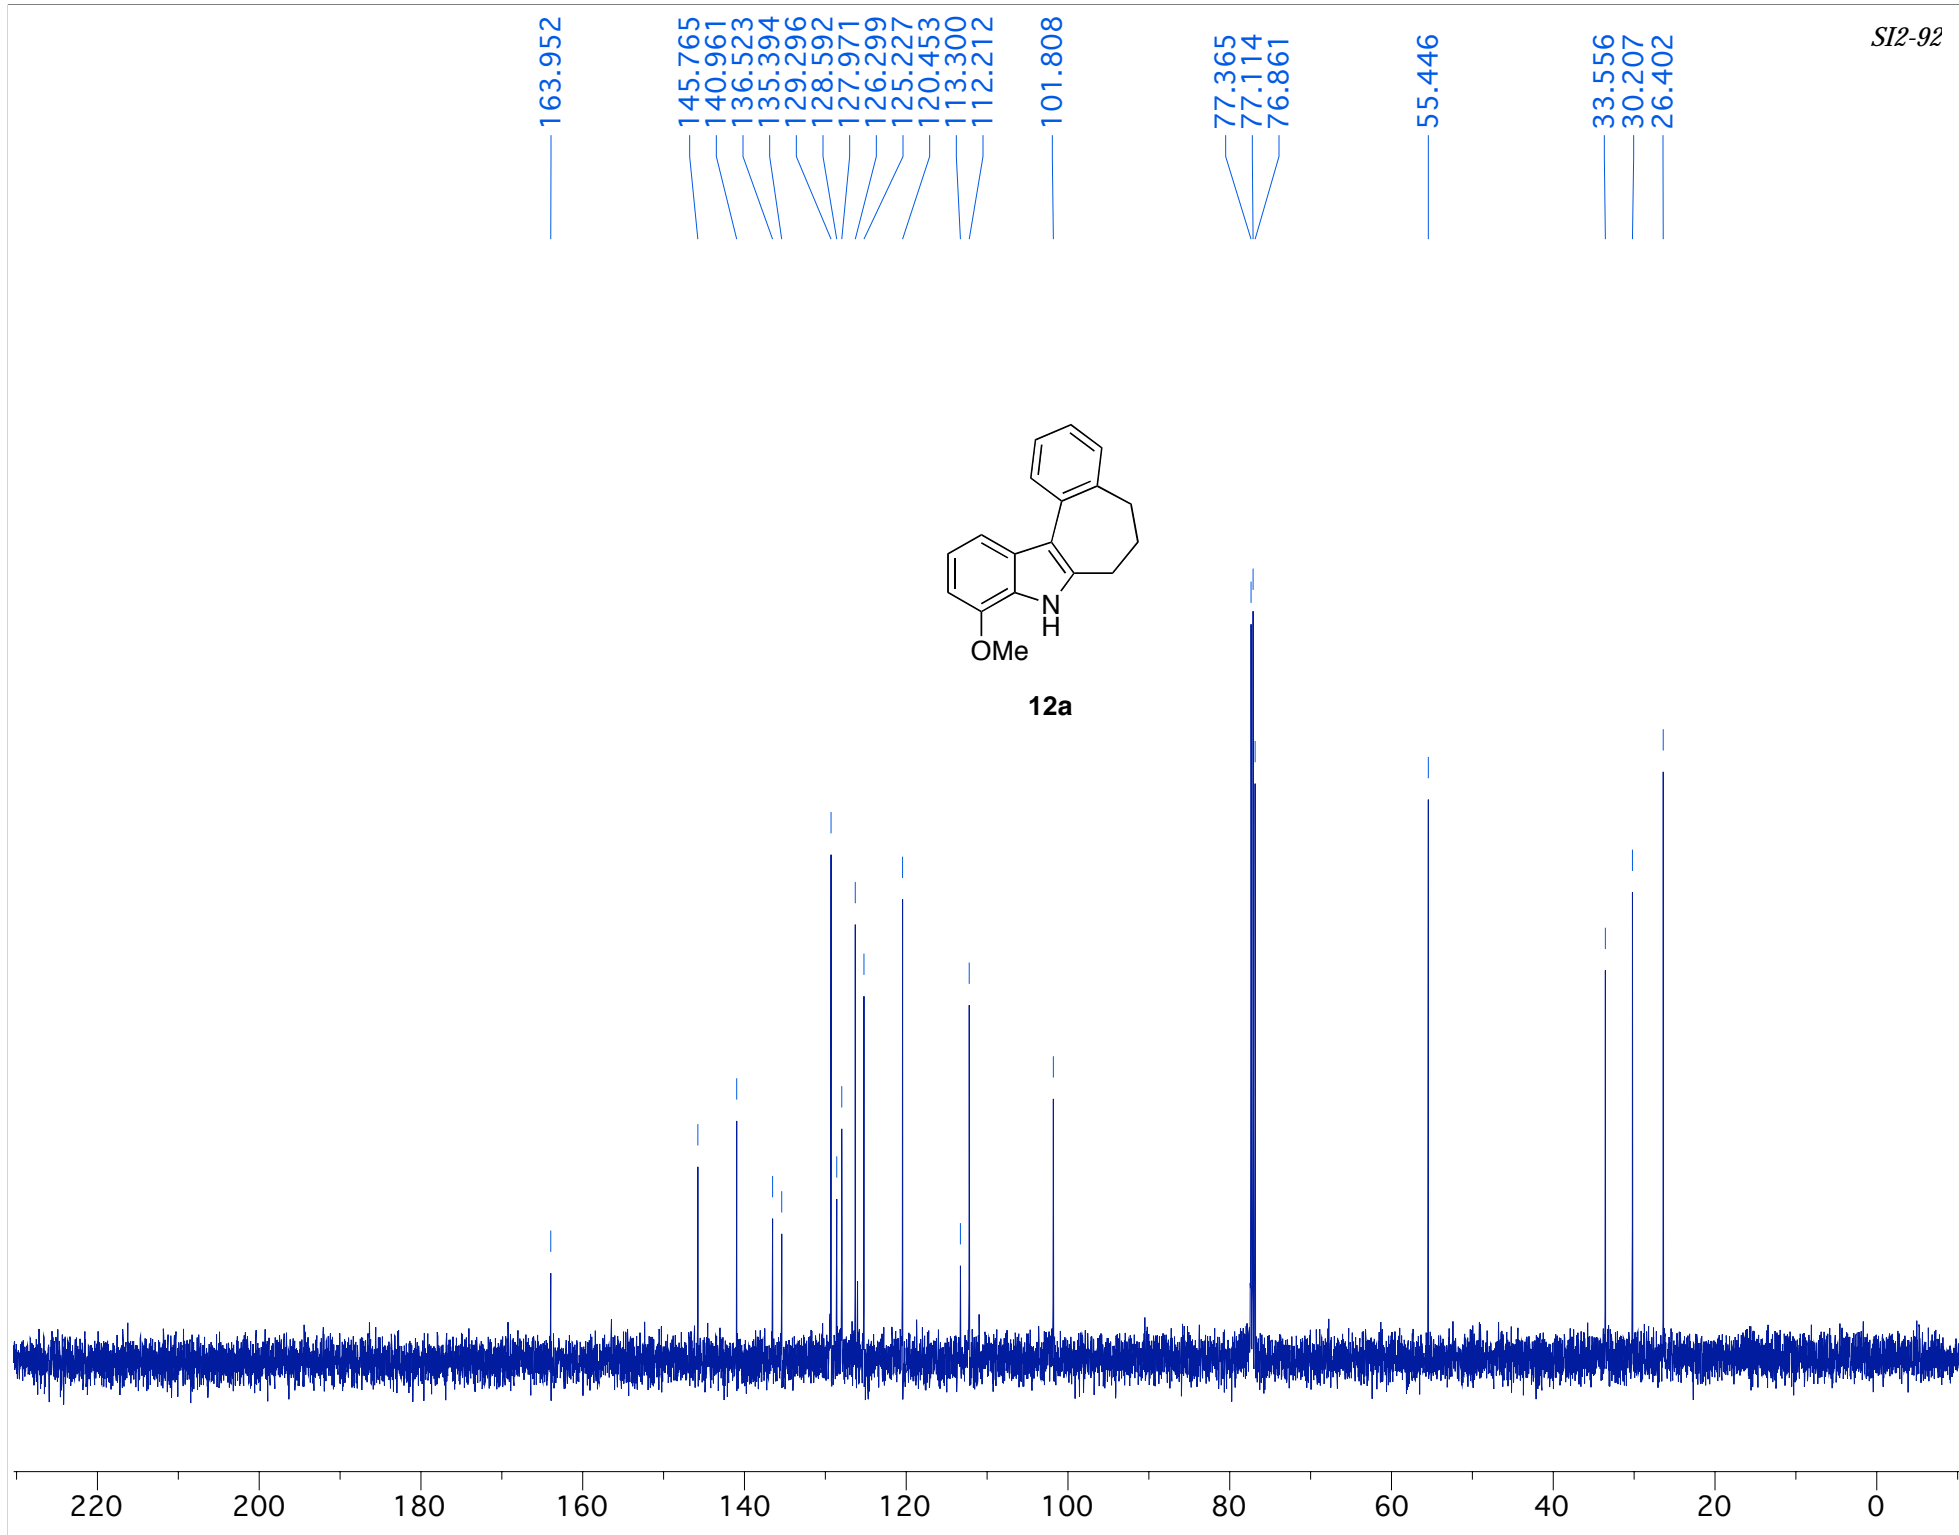

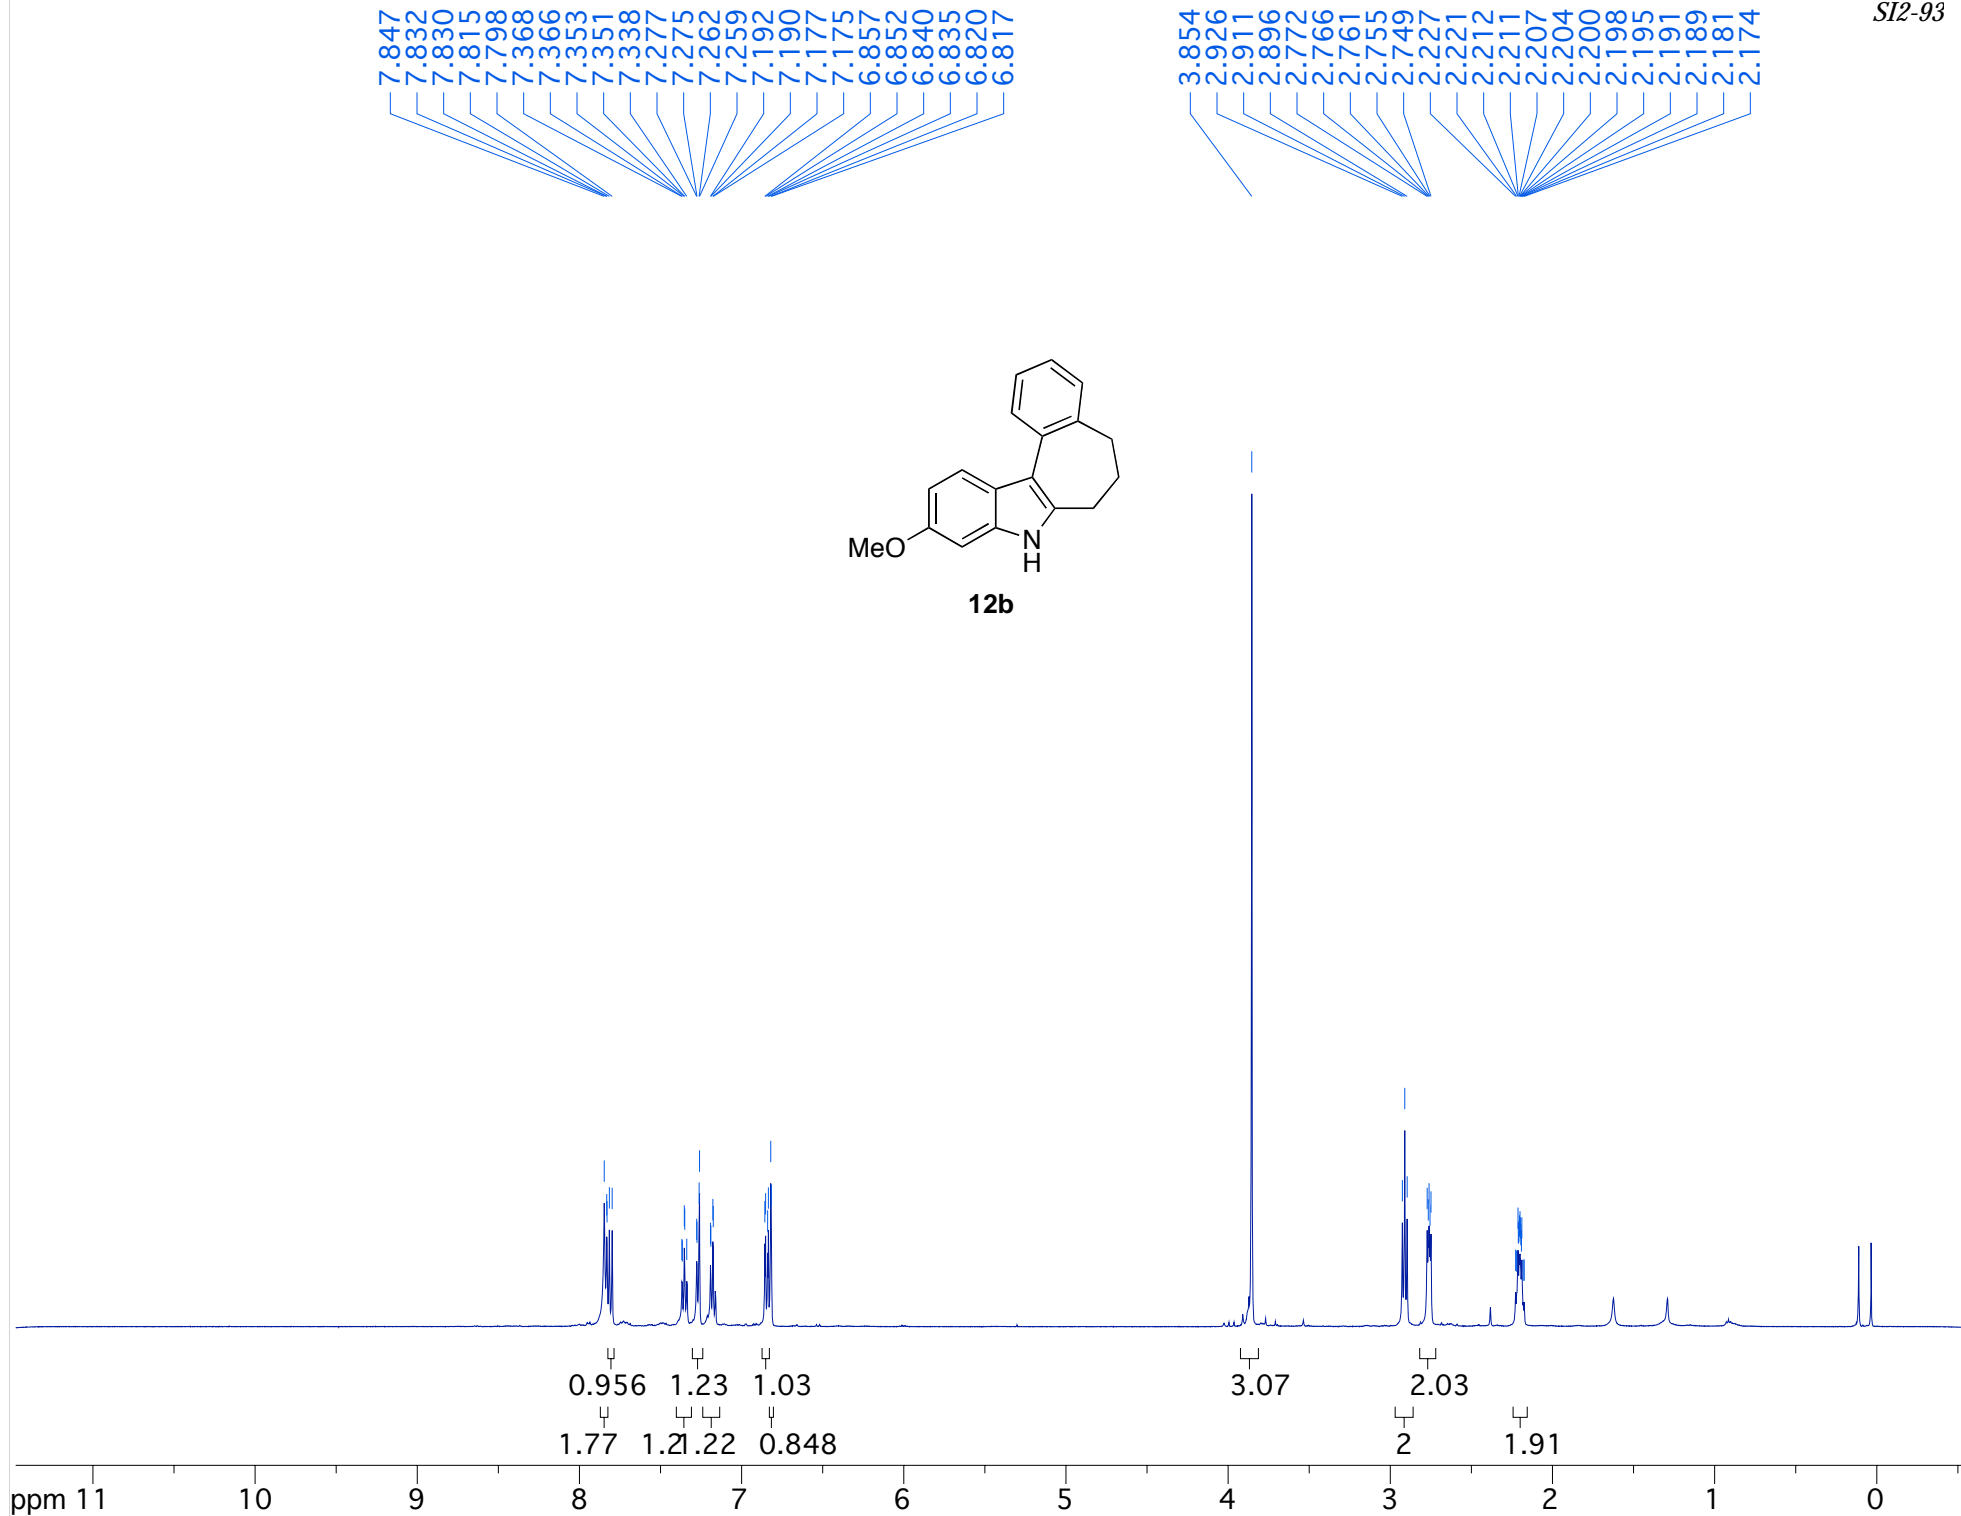

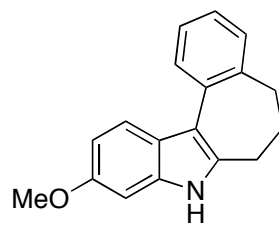

12b

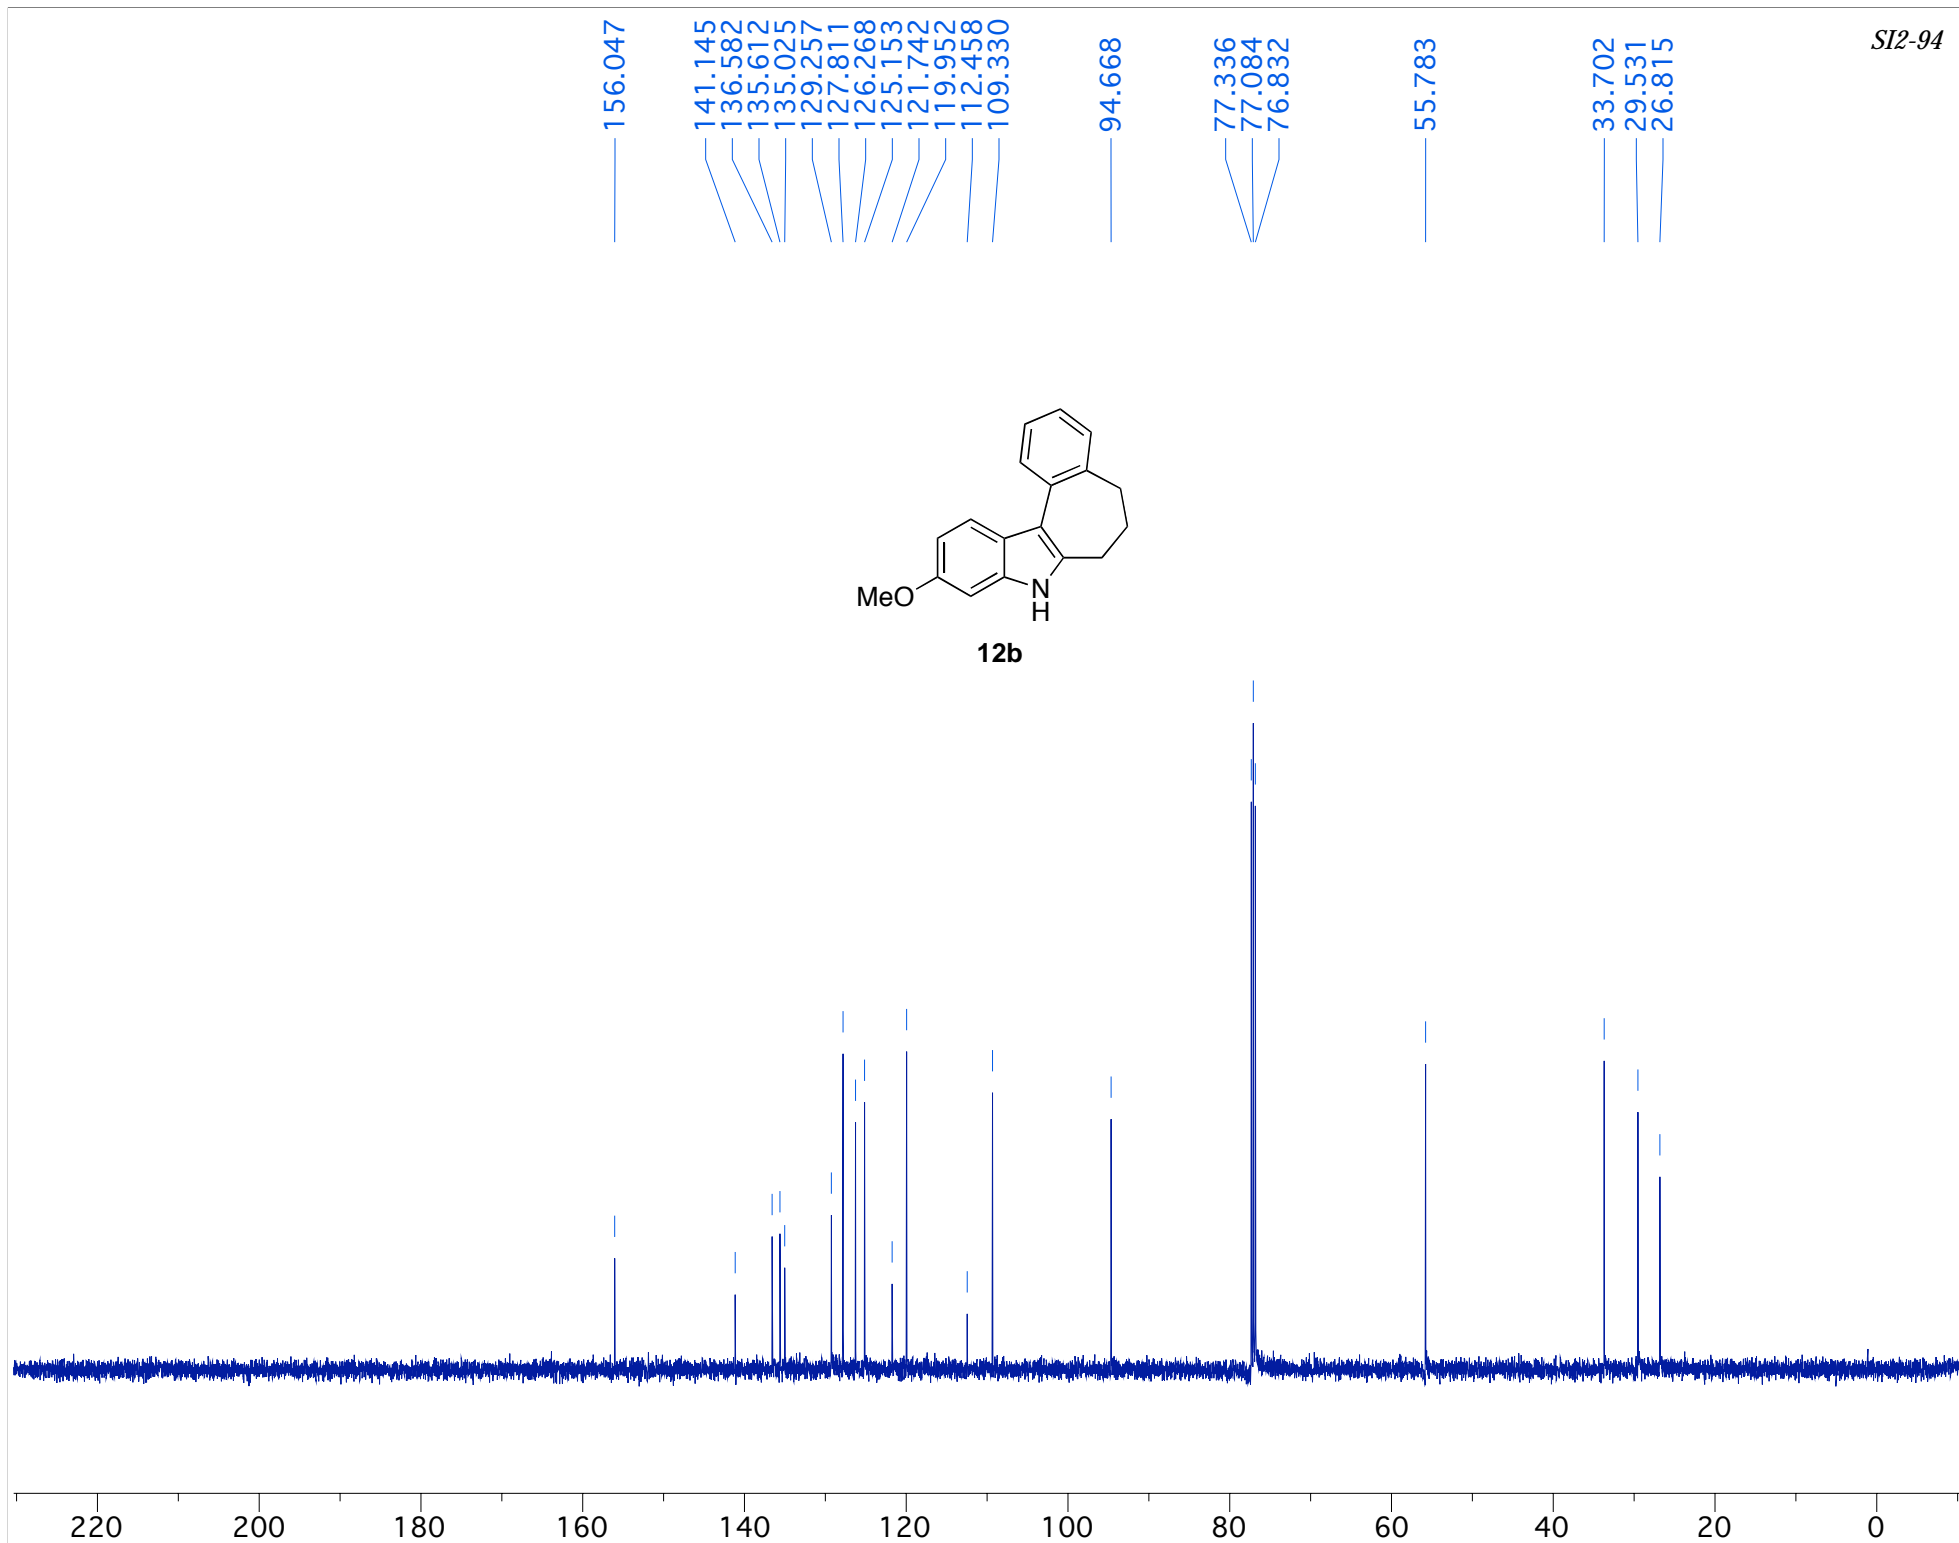

7.915  
7.843  
7.837  
7.827  
7.810  
7.796  
7.794  
7.781  
7.778  
7.402  
7.388  
7.385  
7.380  
7.373  
7.370  
7.358  
7.355  
7.318  
7.314  
7.302  
7.302  
7.301  
7.296  
7.292  
7.286  
7.286  
7.283  
7.282  
7.258  
7.228  
7.225  
7.213  
7.210  
7.198  
7.196  
7.170  
7.167  
7.163  
7.163  
7.155  
7.151  
7.138  
7.134  
2.946  
2.942  
2.932  
2.928  
2.914  
2.899  
2.780  
2.768  
2.761  
2.754  
2.749  
2.744  
2.737  
2.422  
2.409  
2.404  
2.402  
2.391  
2.260  
2.253  
2.248  
2.245  
2.243  
2.239  
2.236  
2.233  
2.231  
2.228  
2.224  
2.221  
2.220

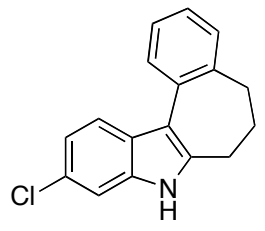

12c

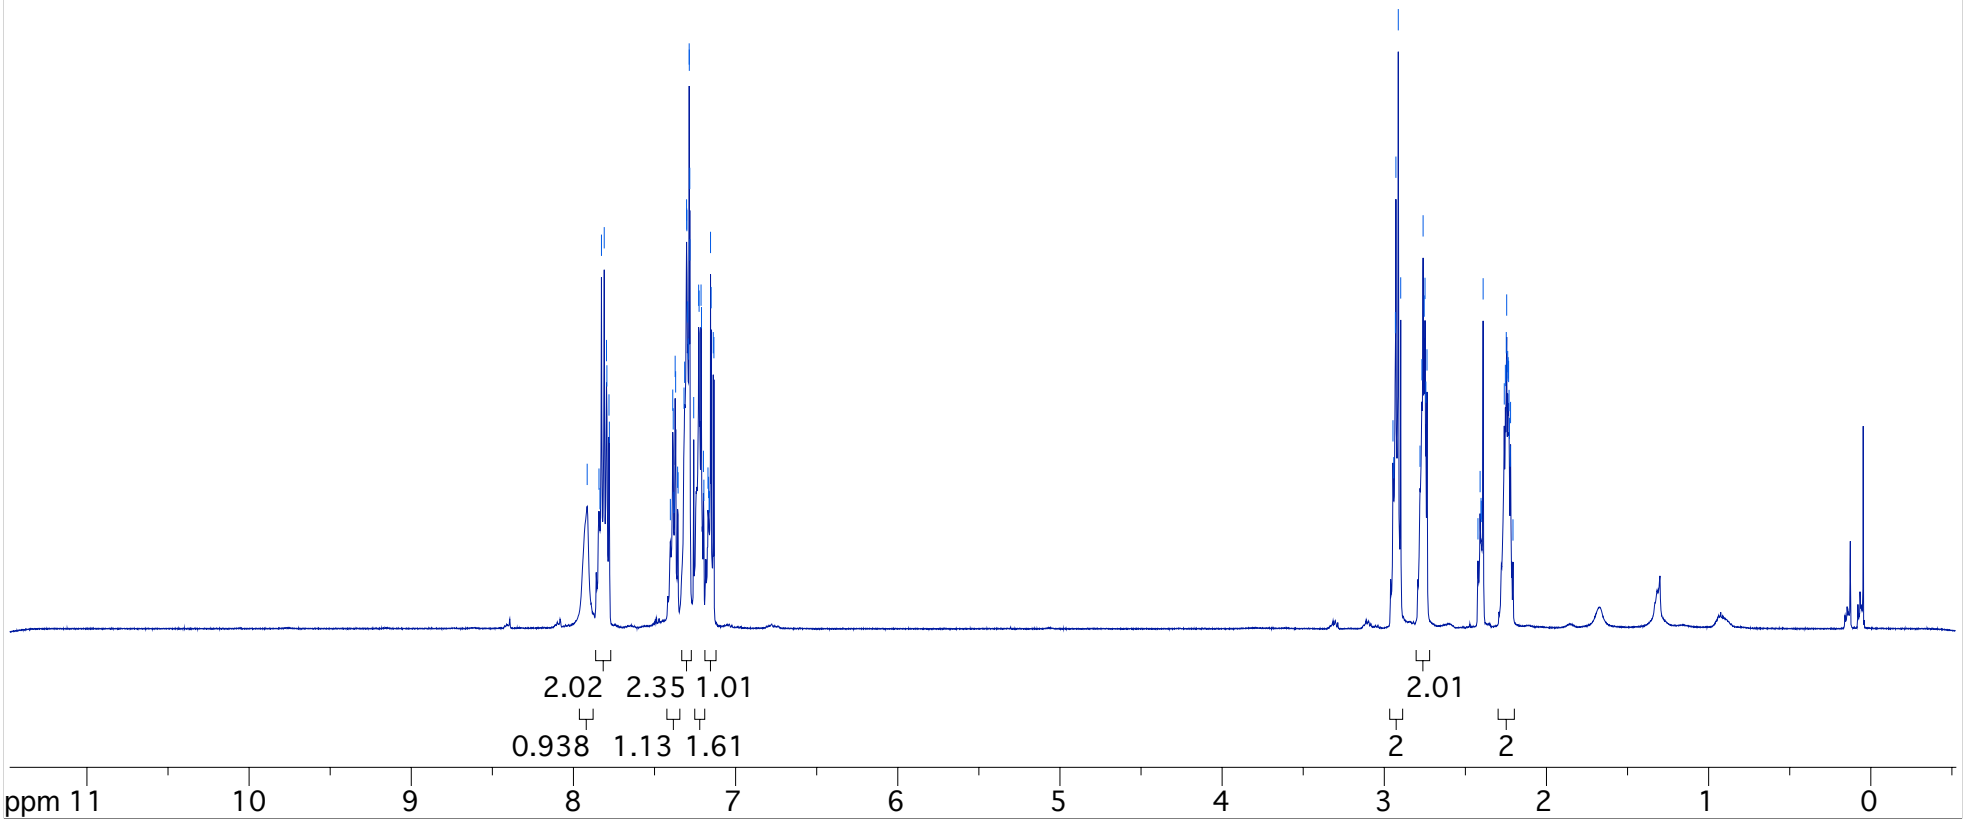

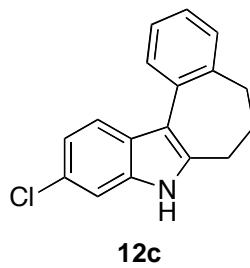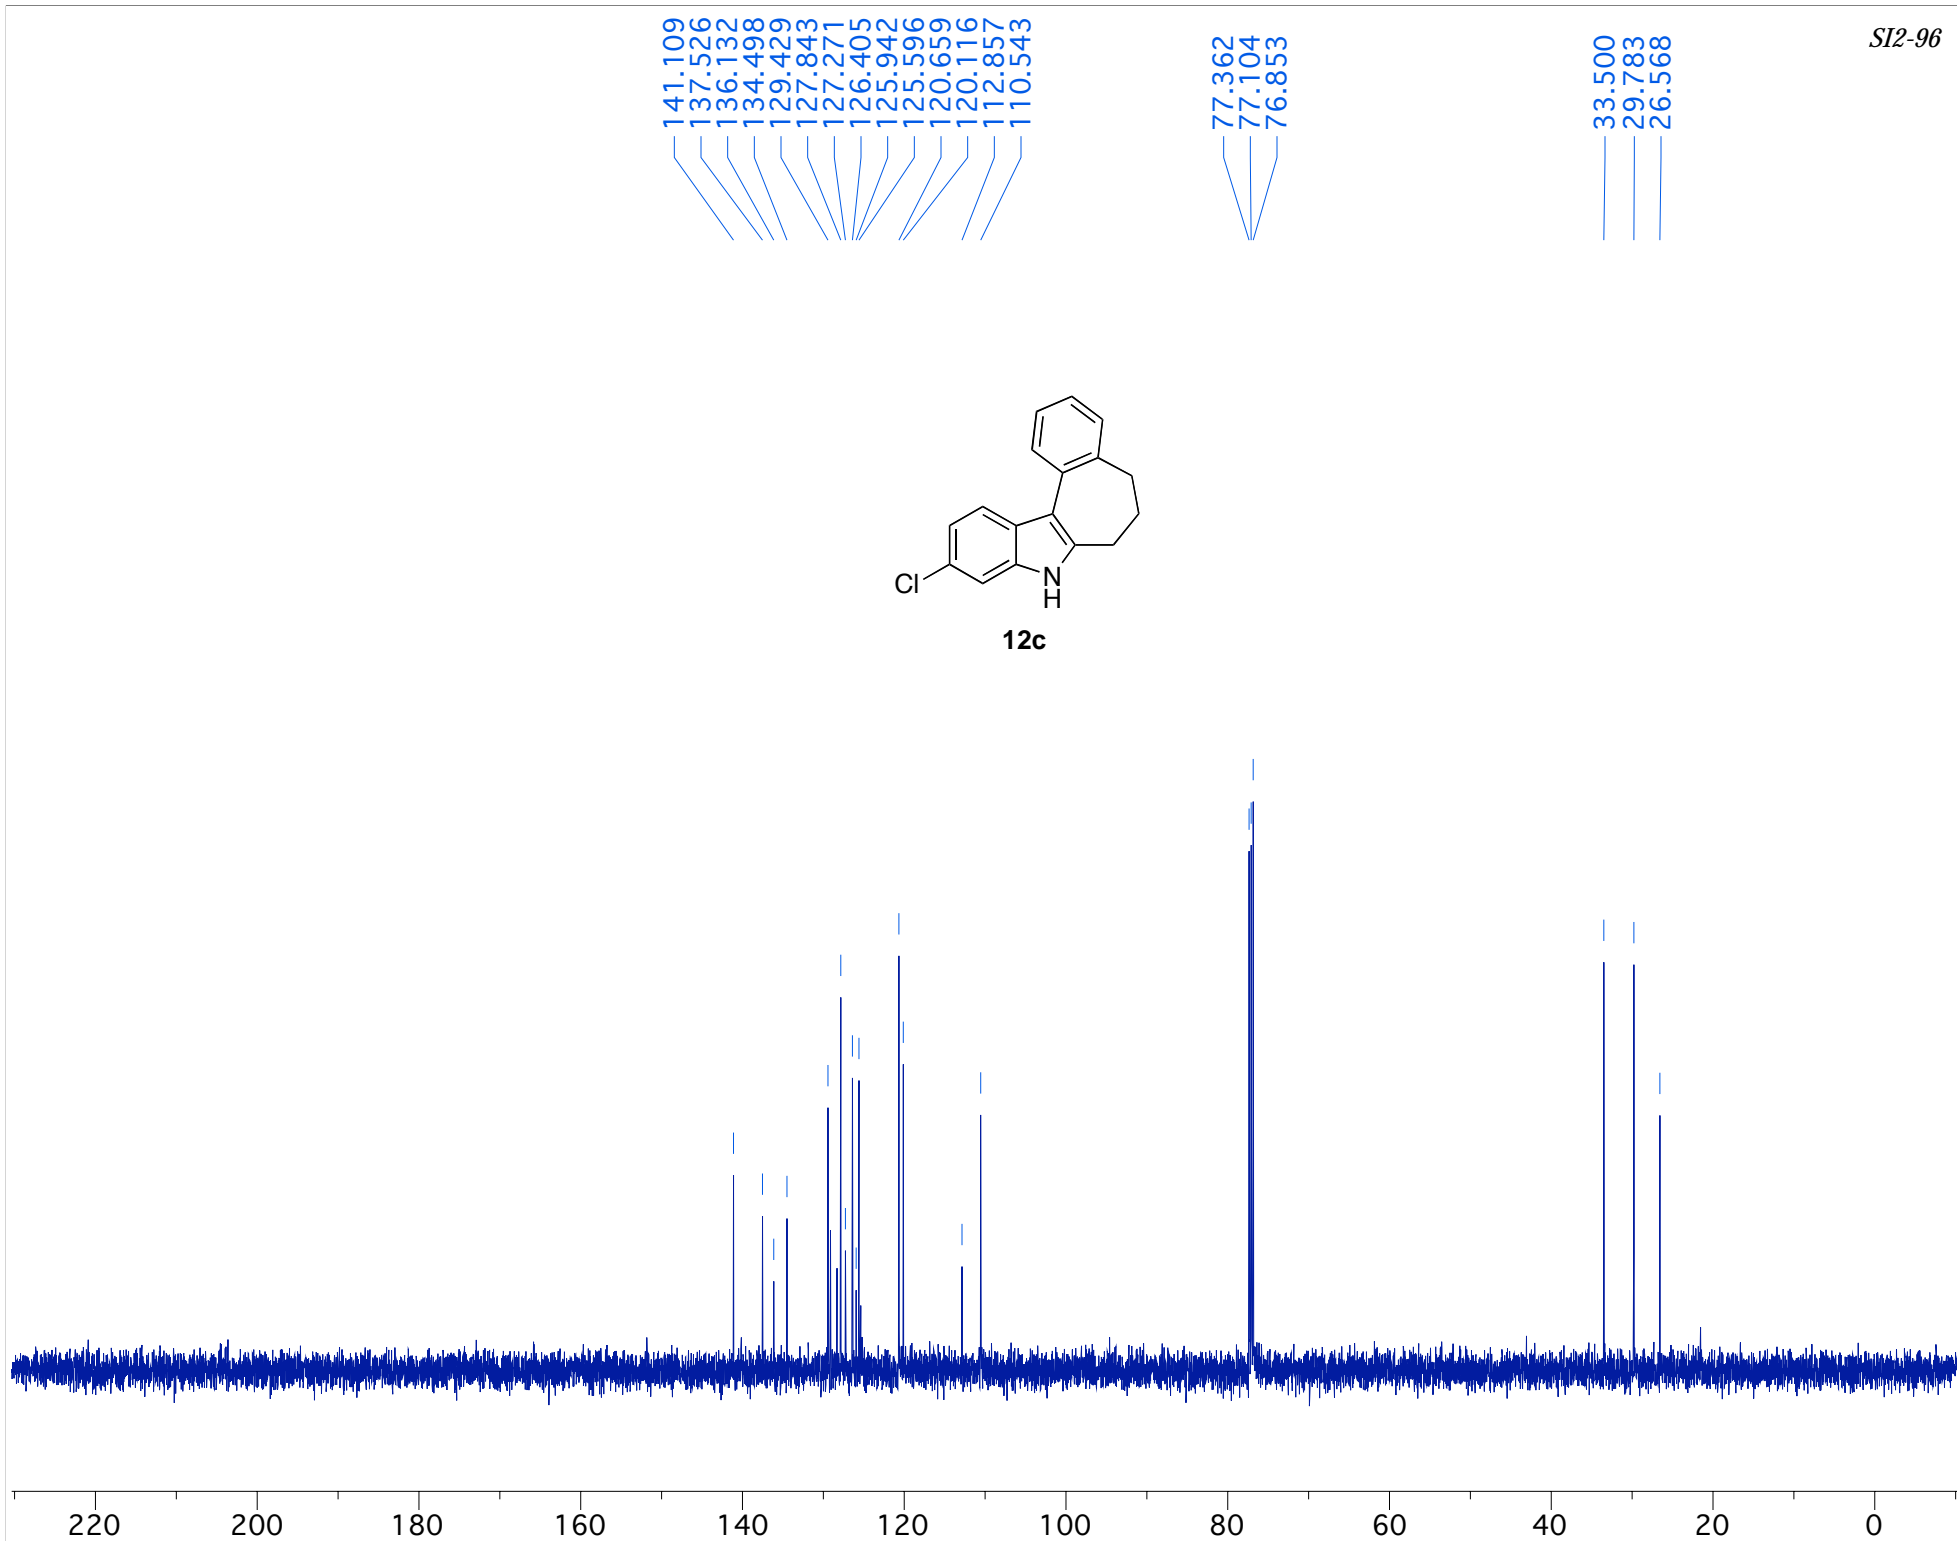



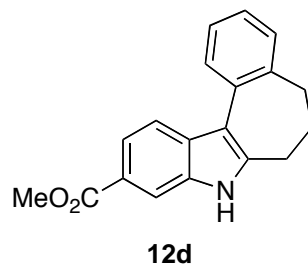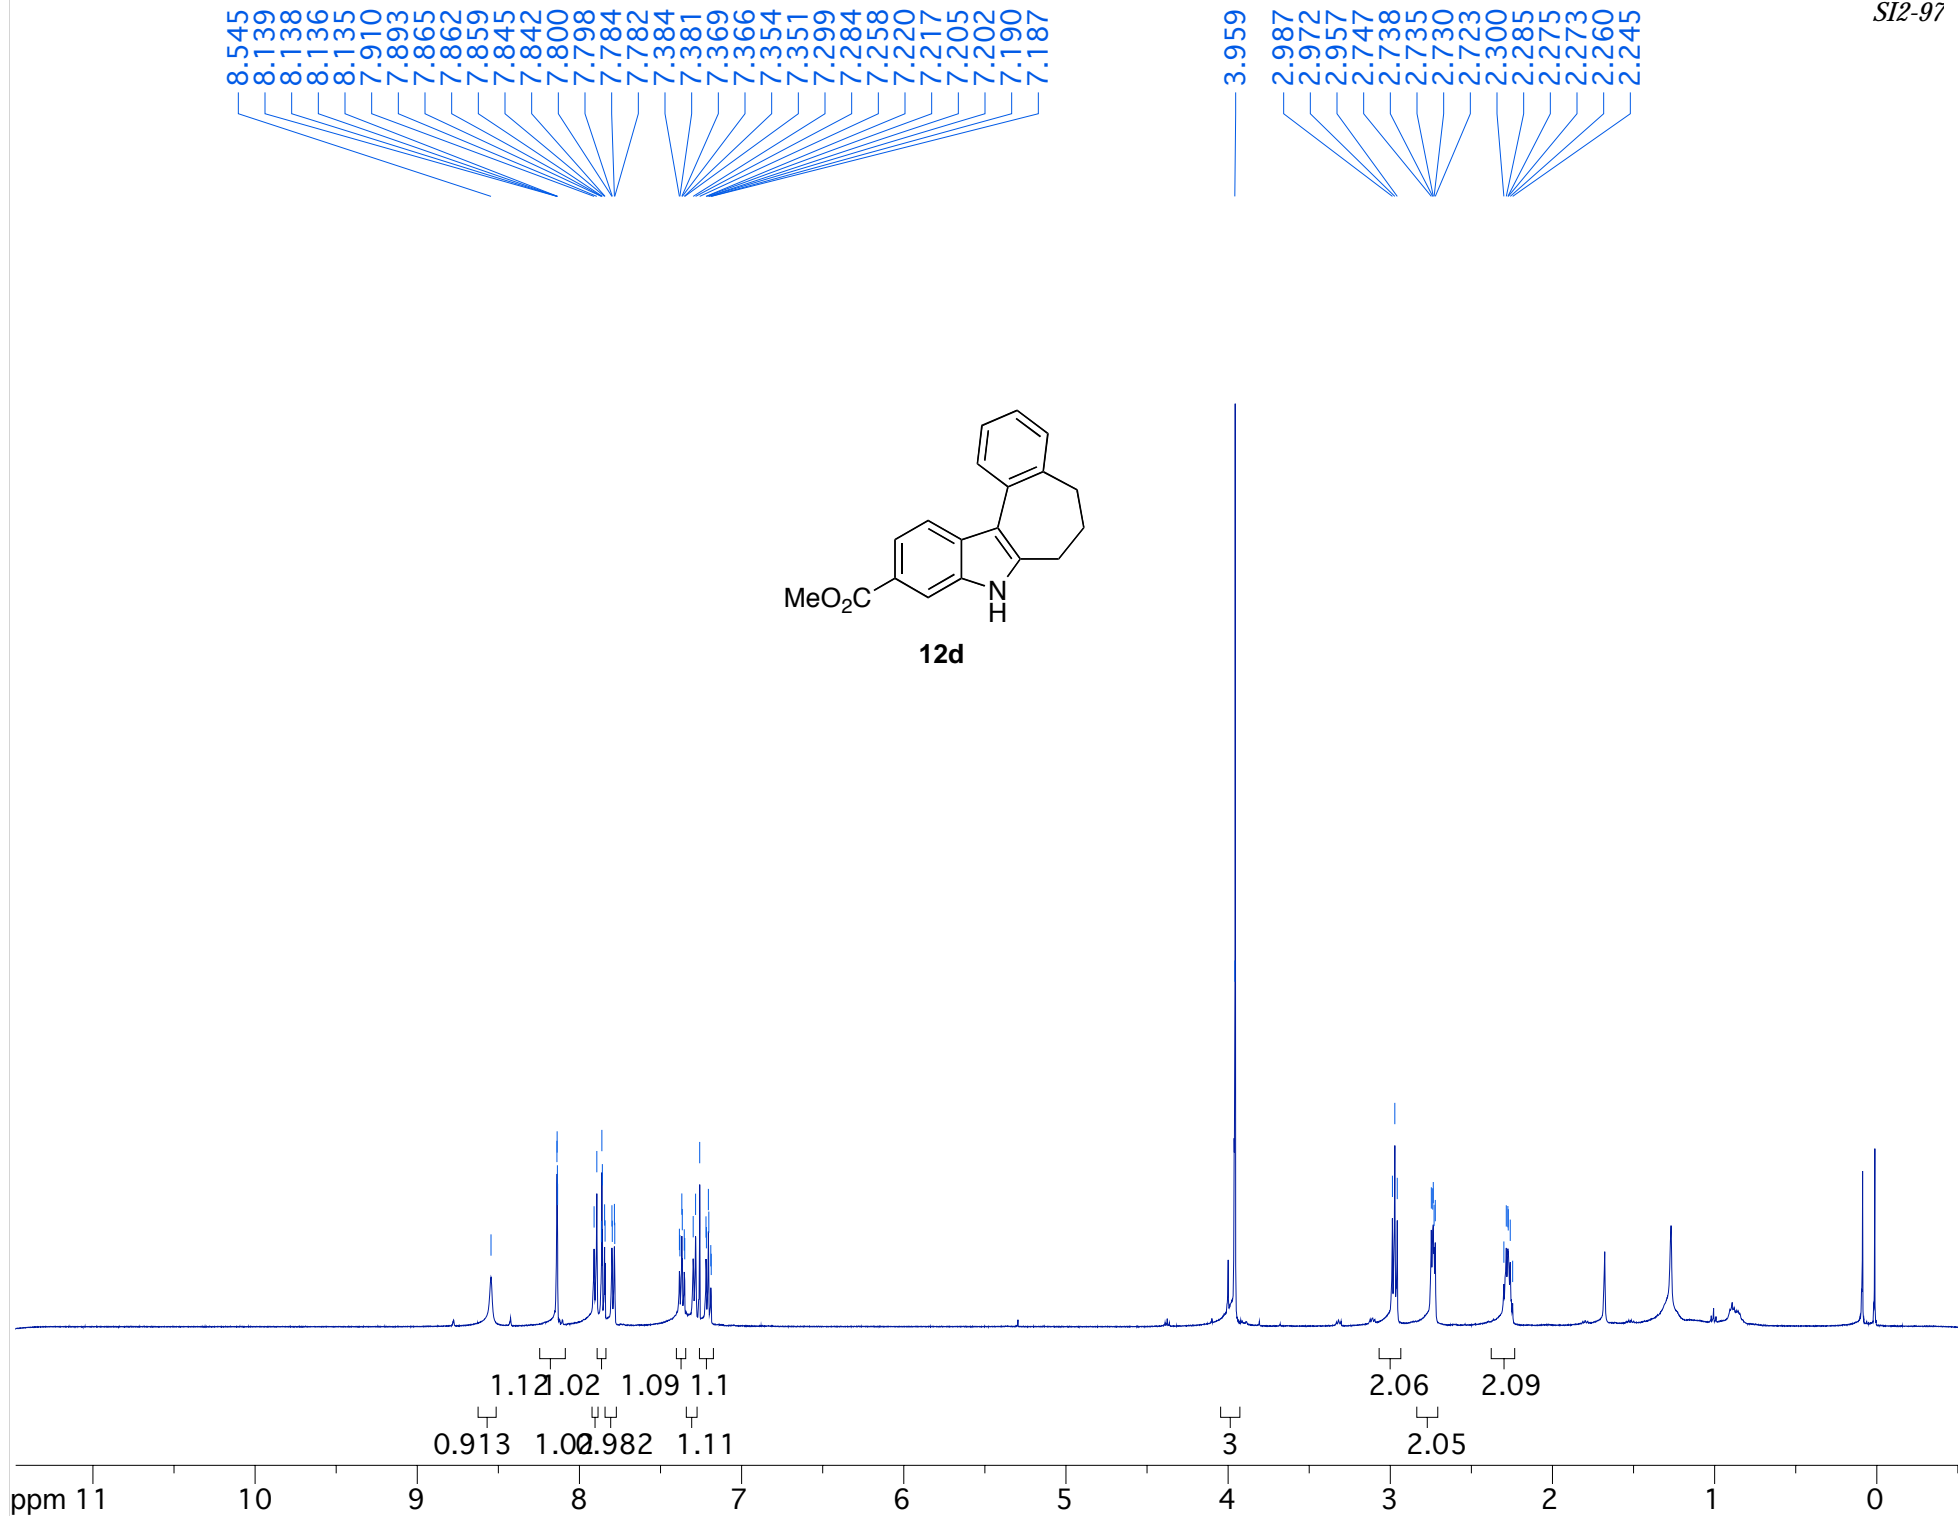

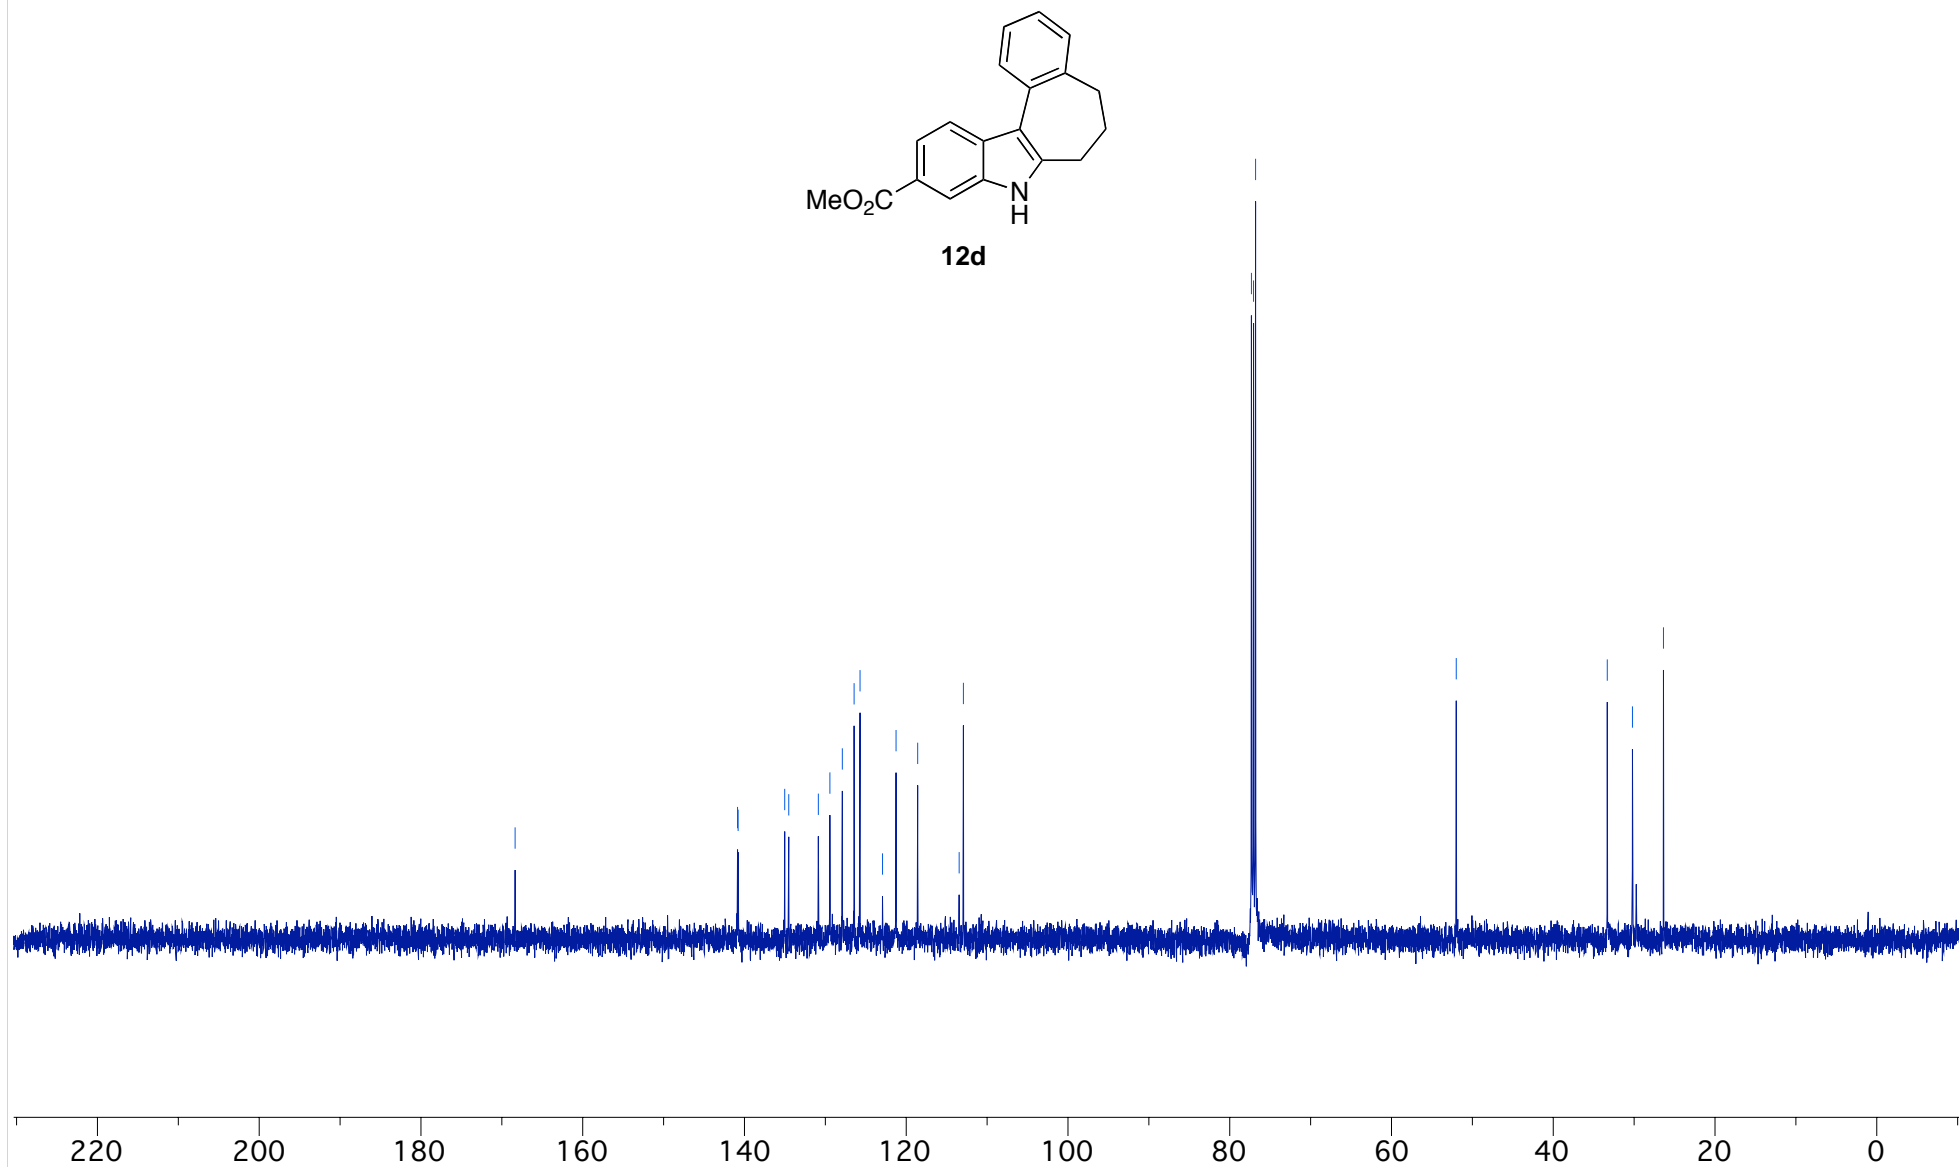

8.182  
7.985  
7.968  
7.807  
7.792  
7.603  
7.423  
7.407  
7.392  
7.379  
7.377  
7.323  
7.309  
7.259  
7.253  
7.251  
7.238  
7.236  
7.223  
7.221

2.964  
2.949  
2.935  
2.756  
2.744  
2.741  
2.732  
2.297  
2.282  
2.269  
2.258  
2.243

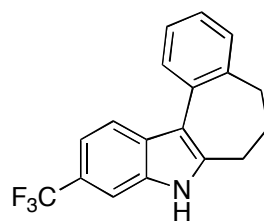

12e

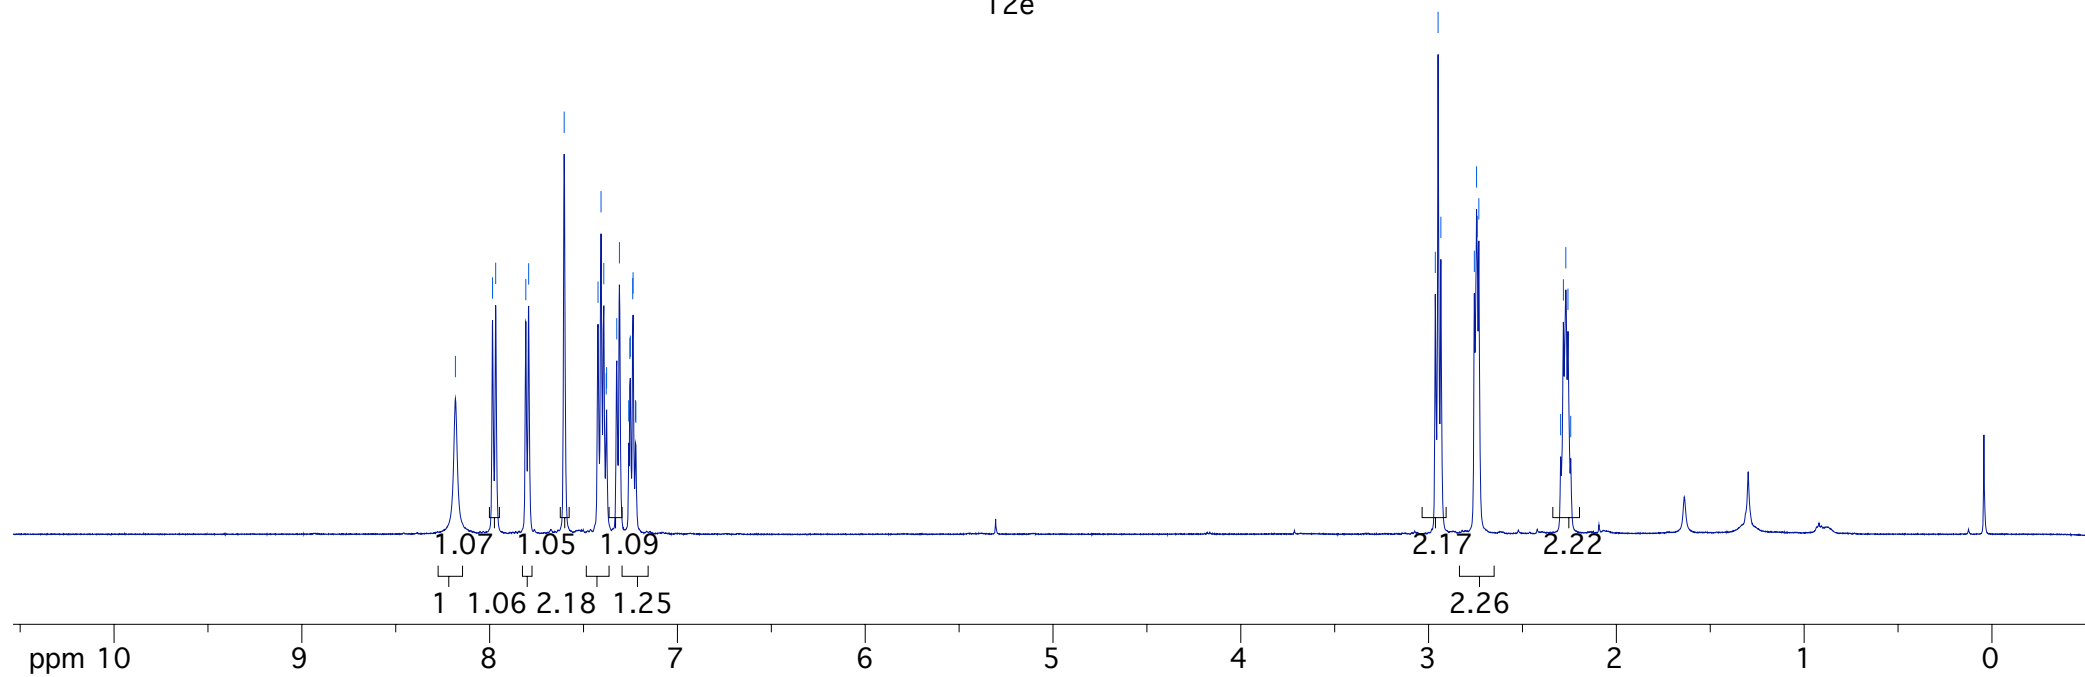

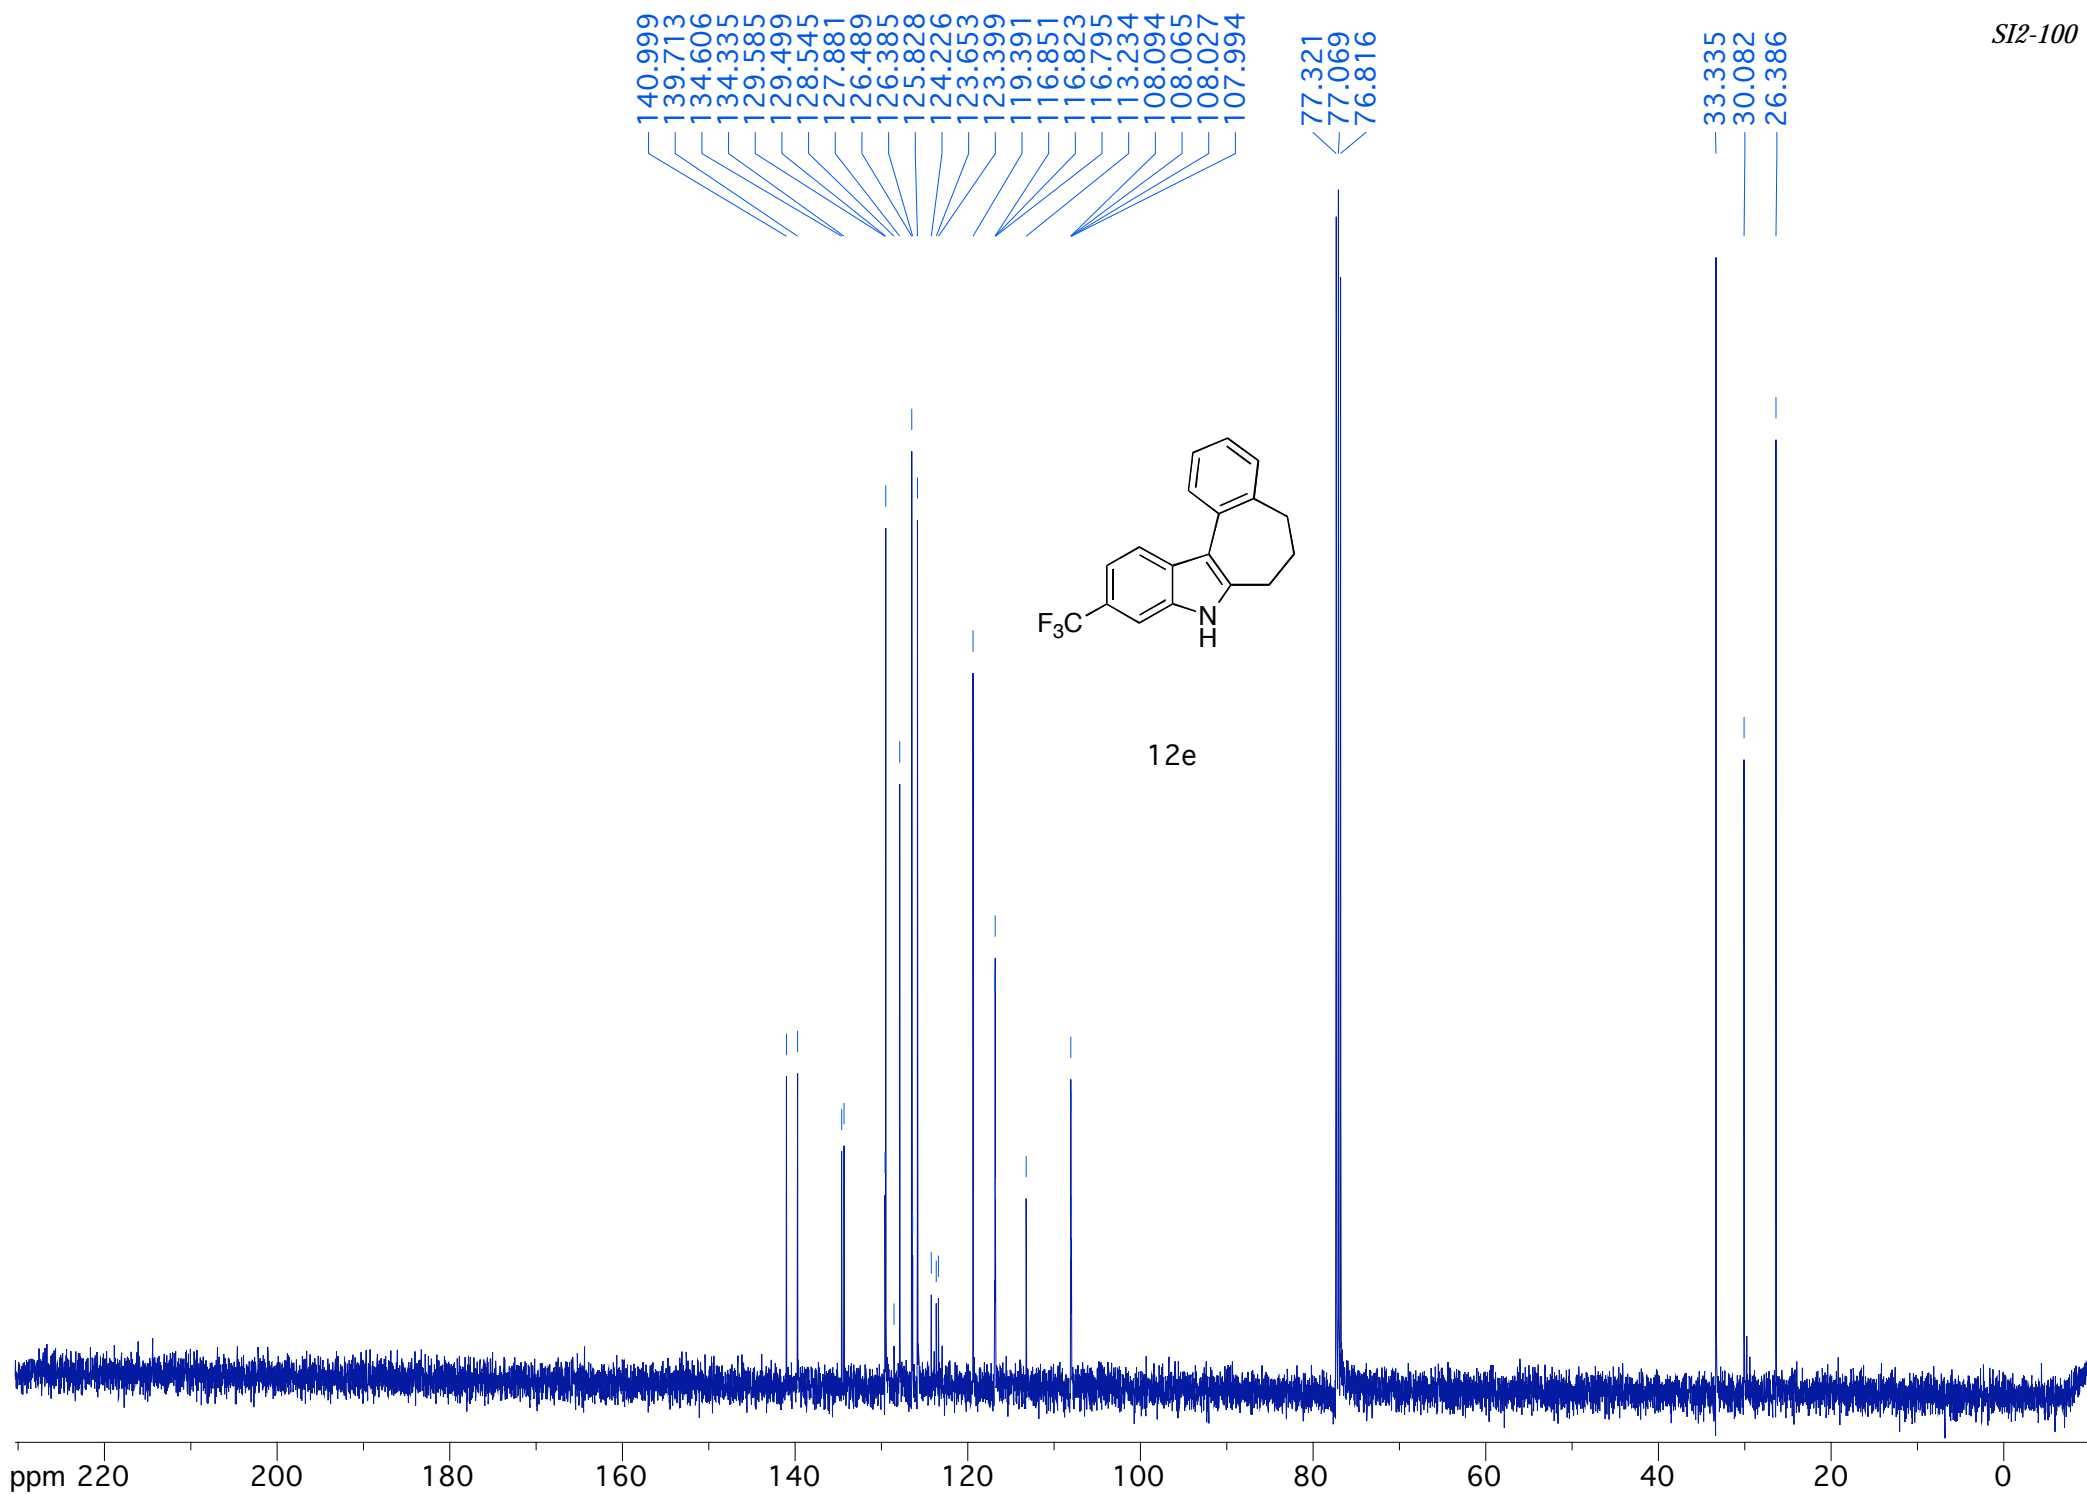

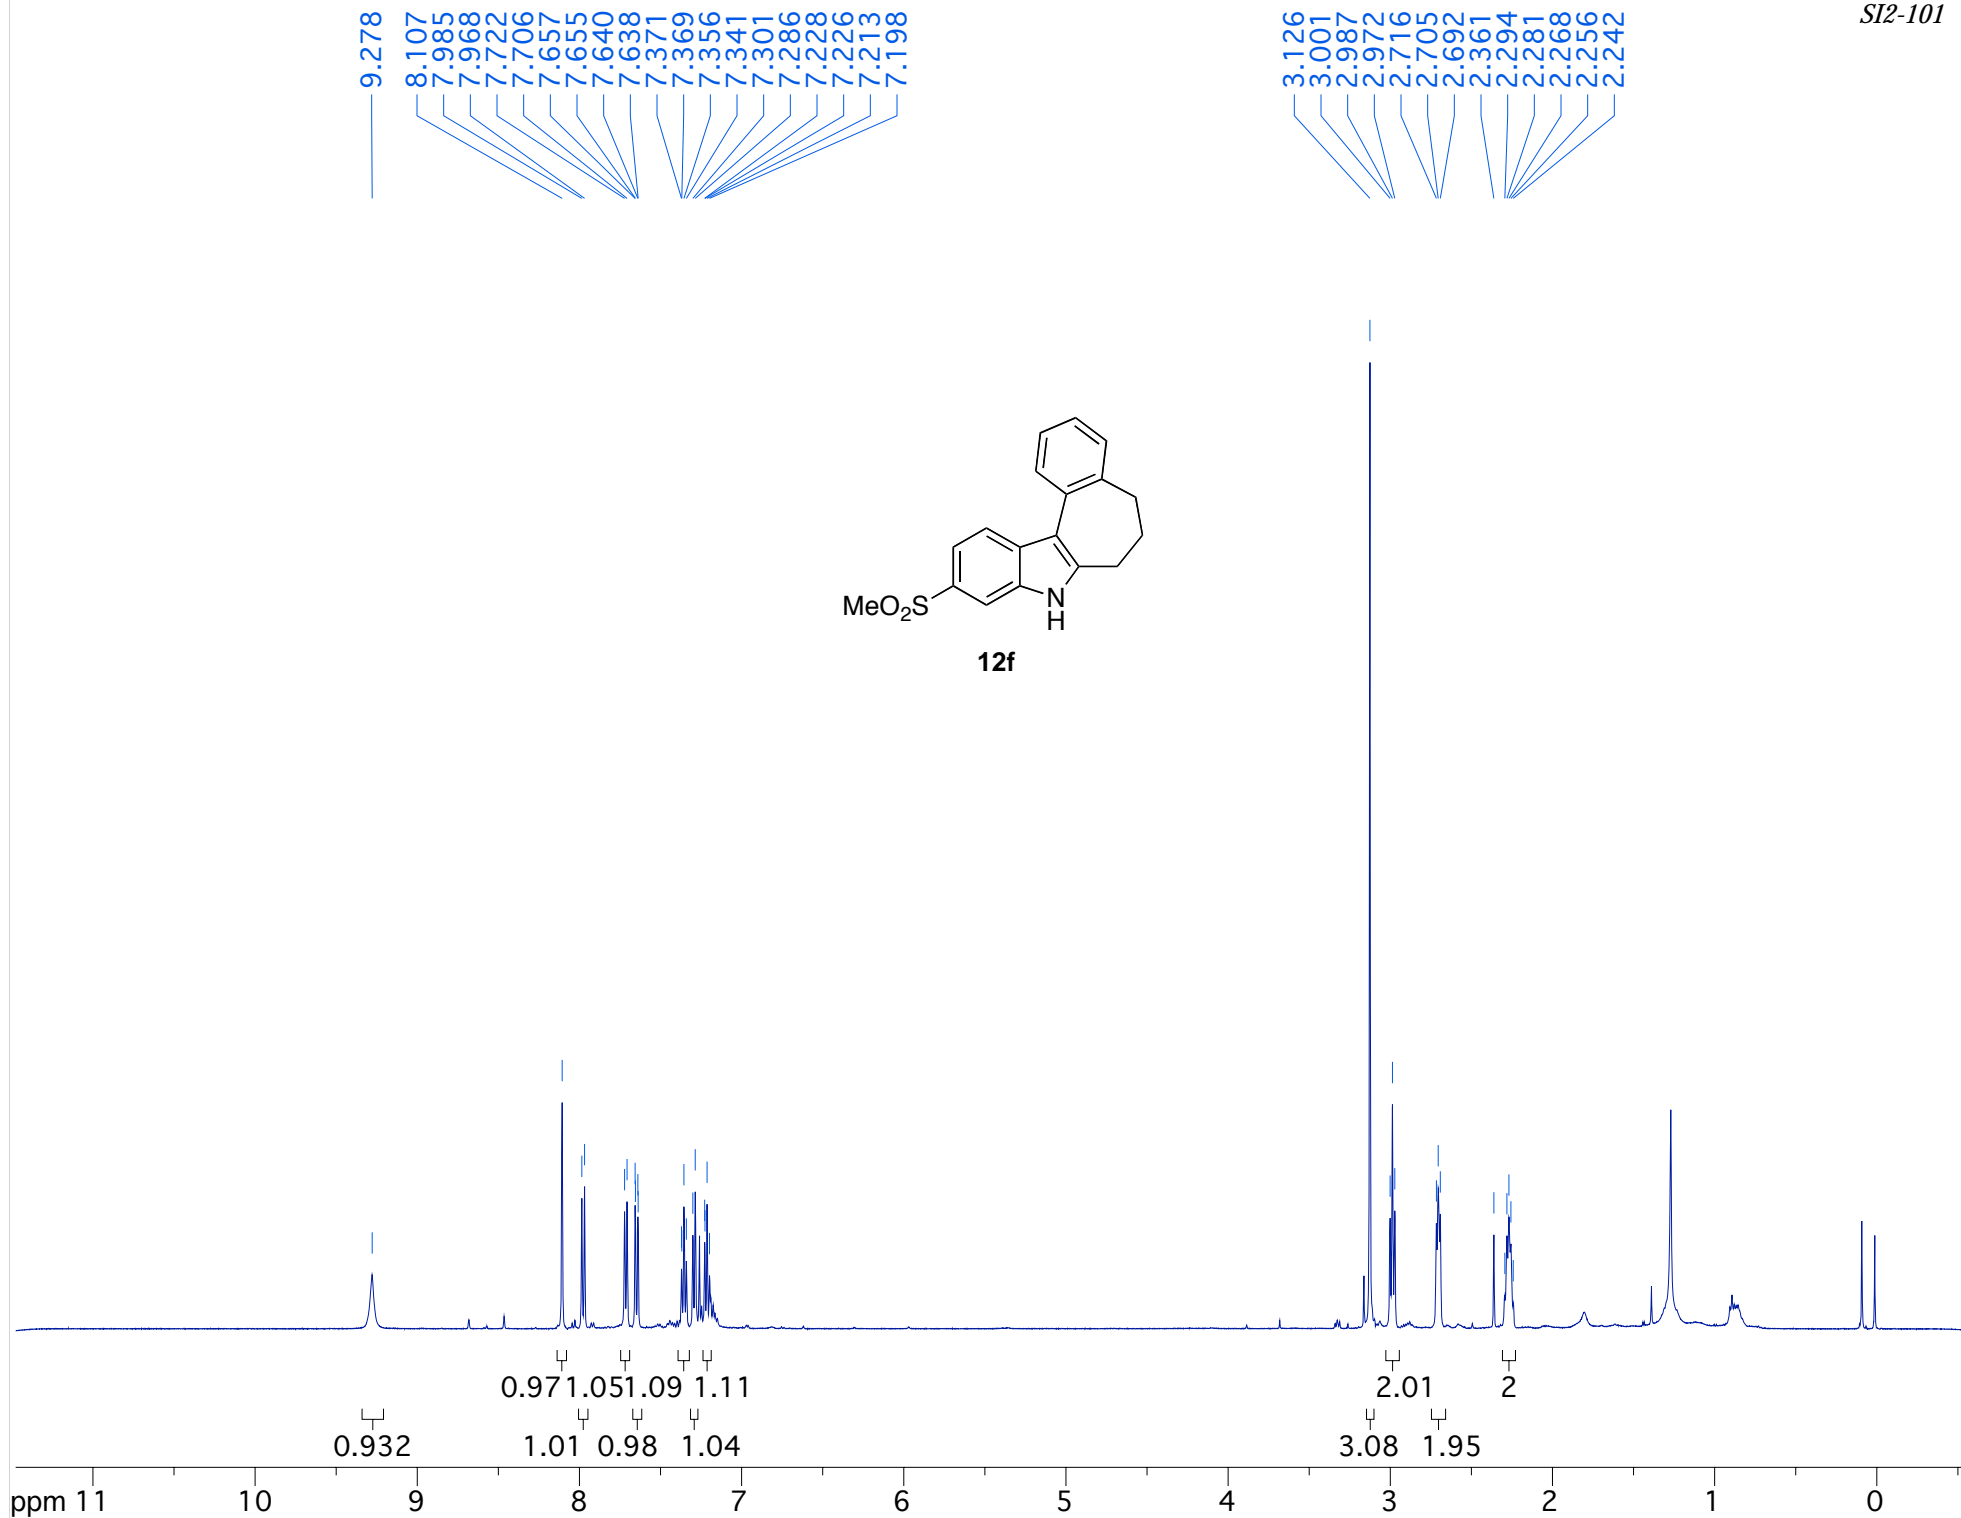

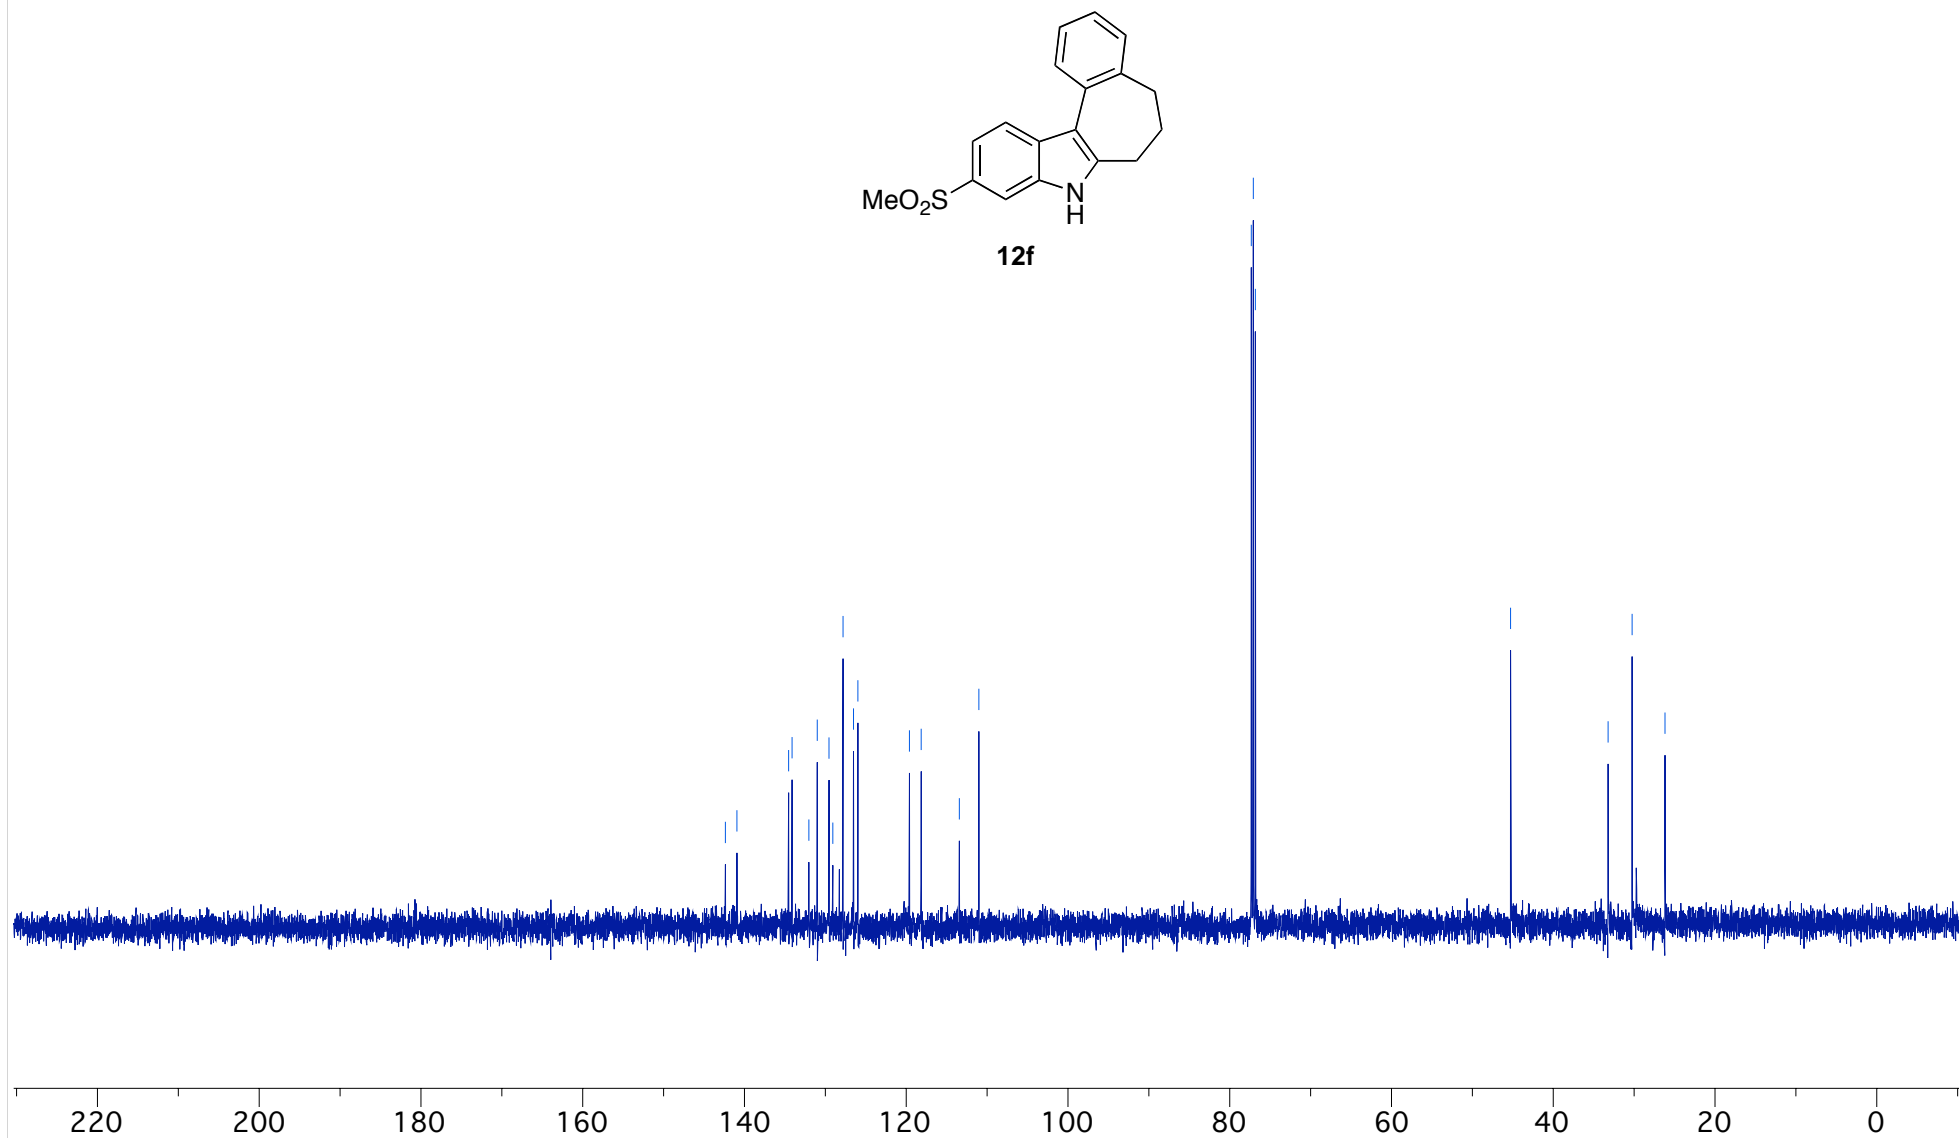

8.028  
8.025  
8.002  
7.766  
7.751  
7.389  
7.386  
7.374  
7.371  
7.359  
7.356  
7.288  
7.282  
7.278  
7.275  
7.265  
7.261  
7.218  
7.216  
7.205  
7.188

2.939  
2.924  
2.909  
2.739  
2.727  
2.723  
2.715  
2.271  
2.256  
2.244  
2.232  
2.217

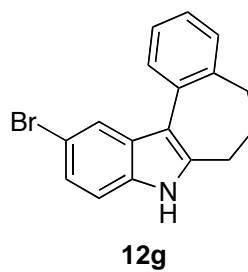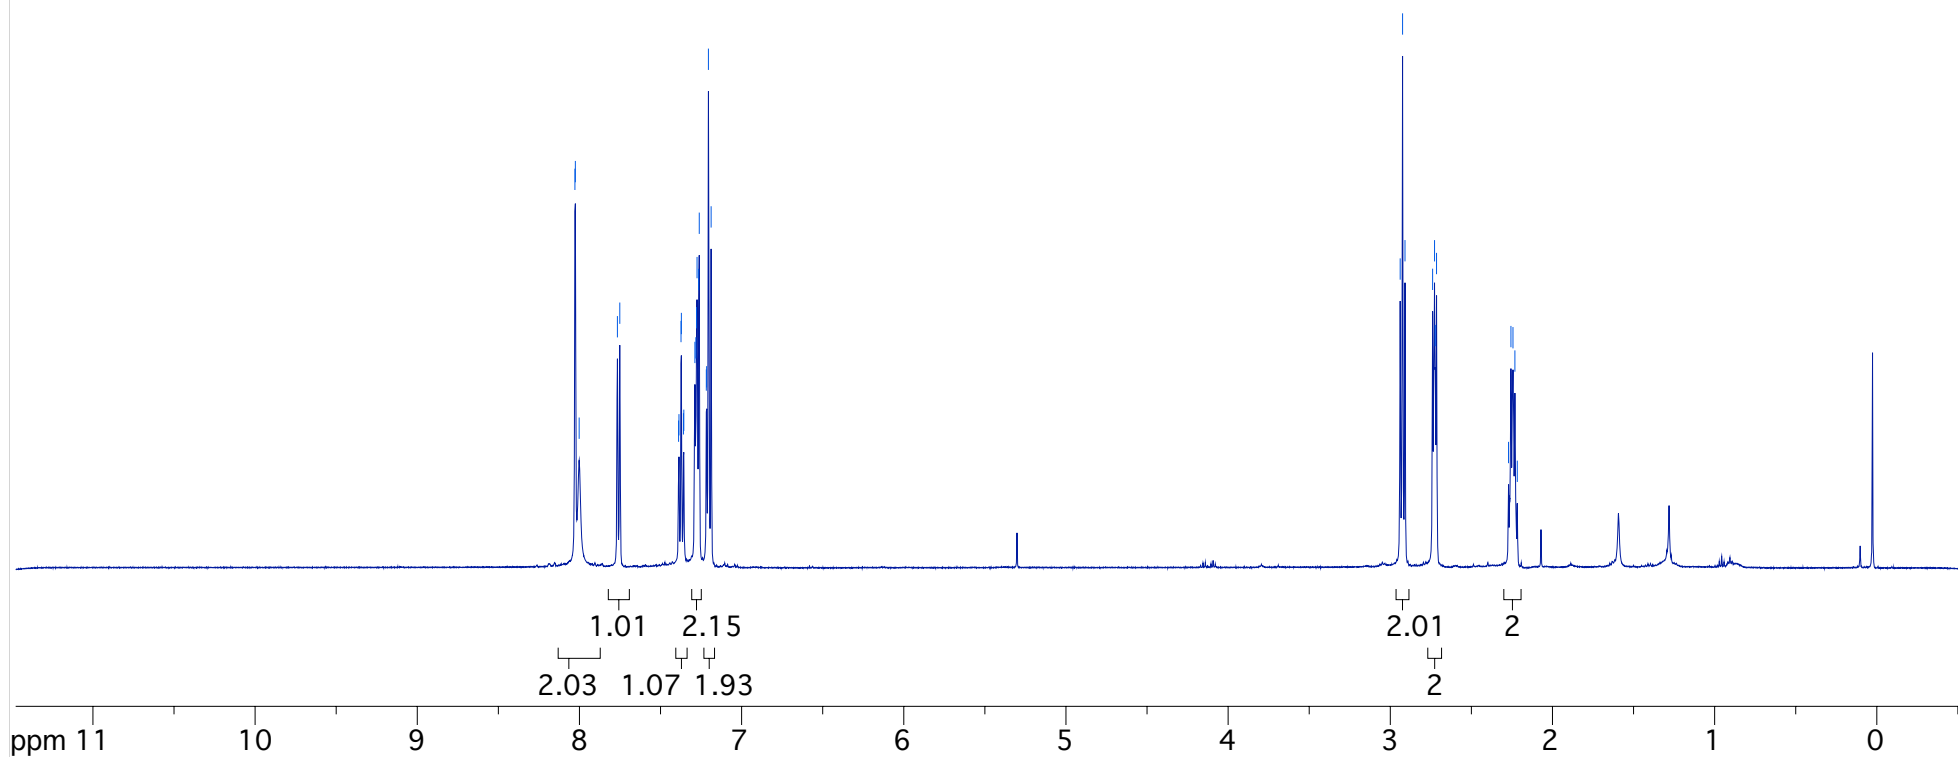

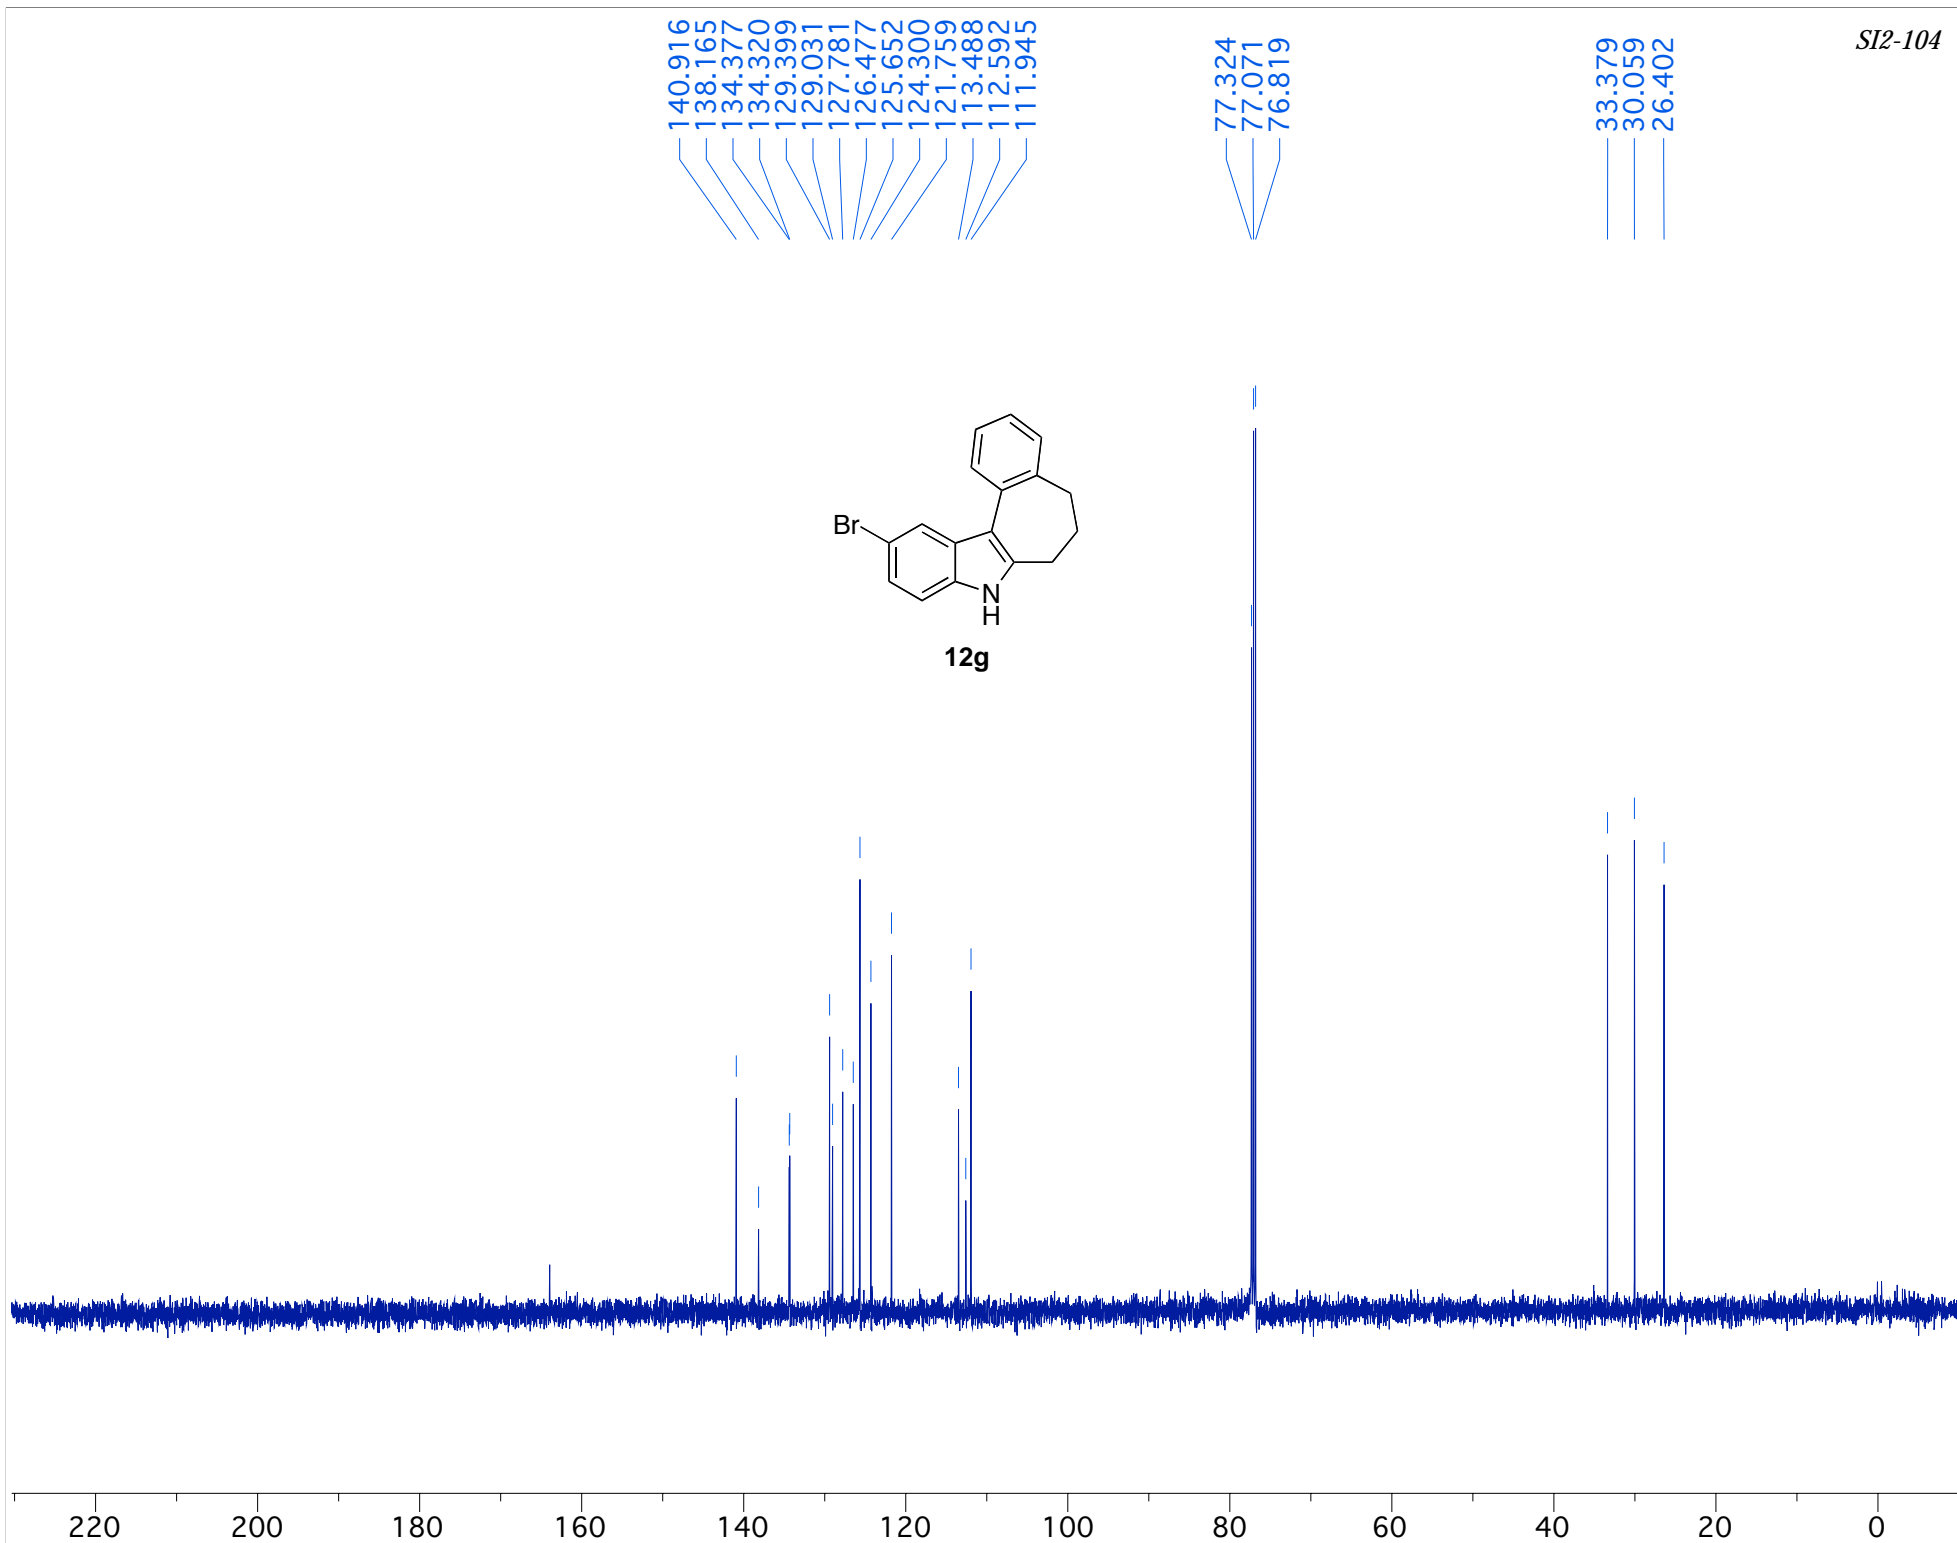



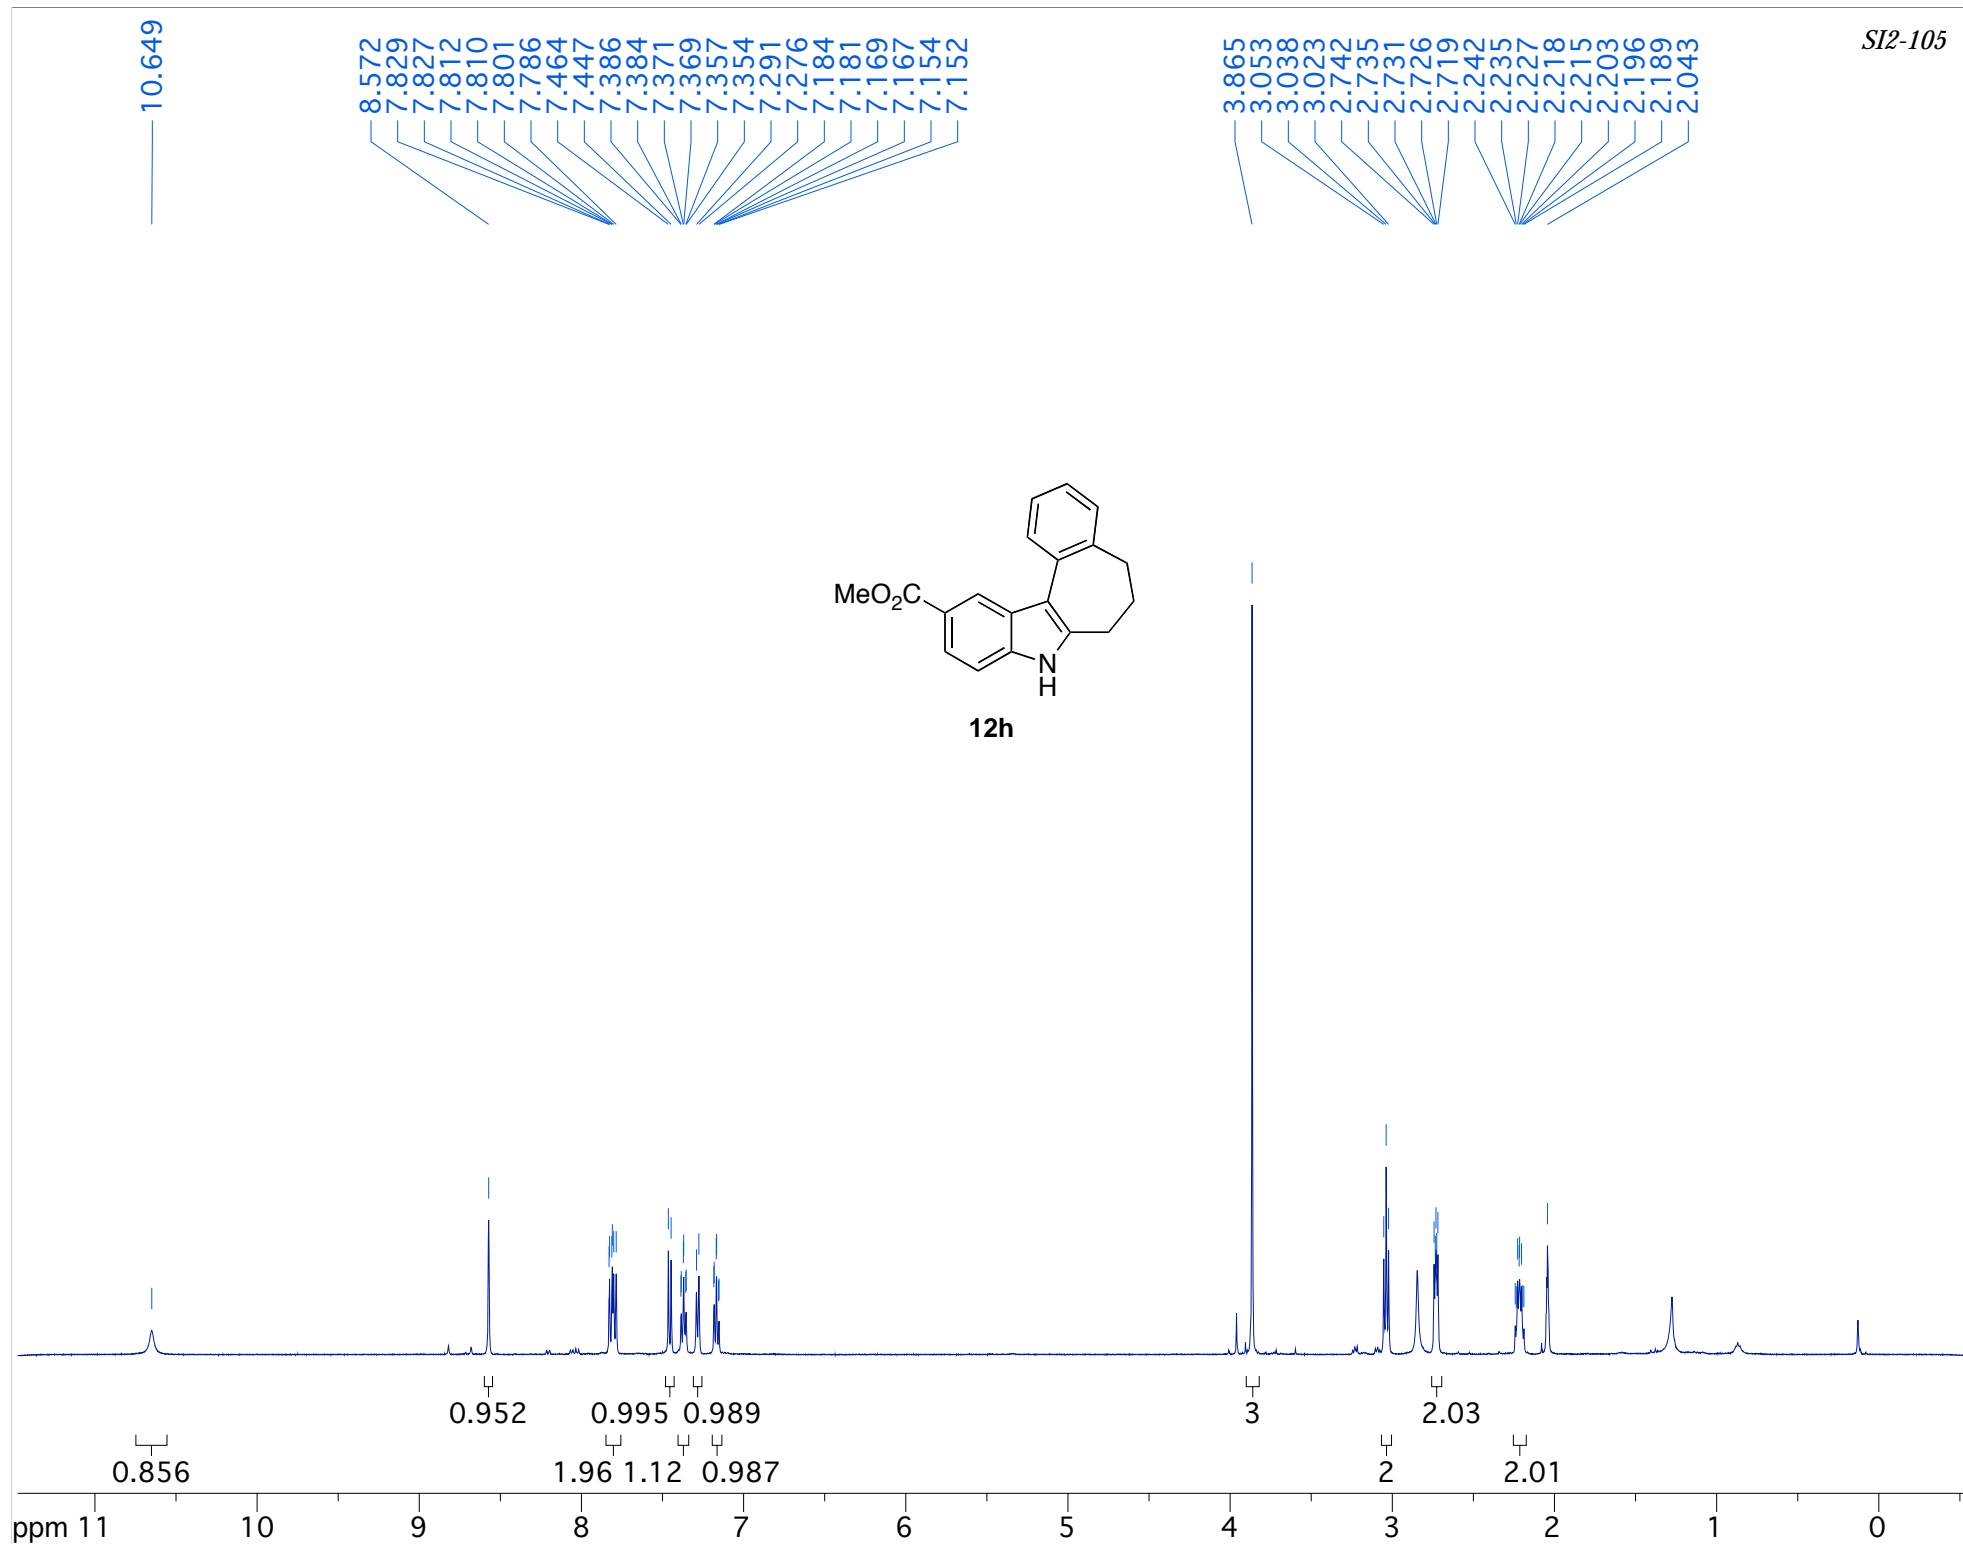

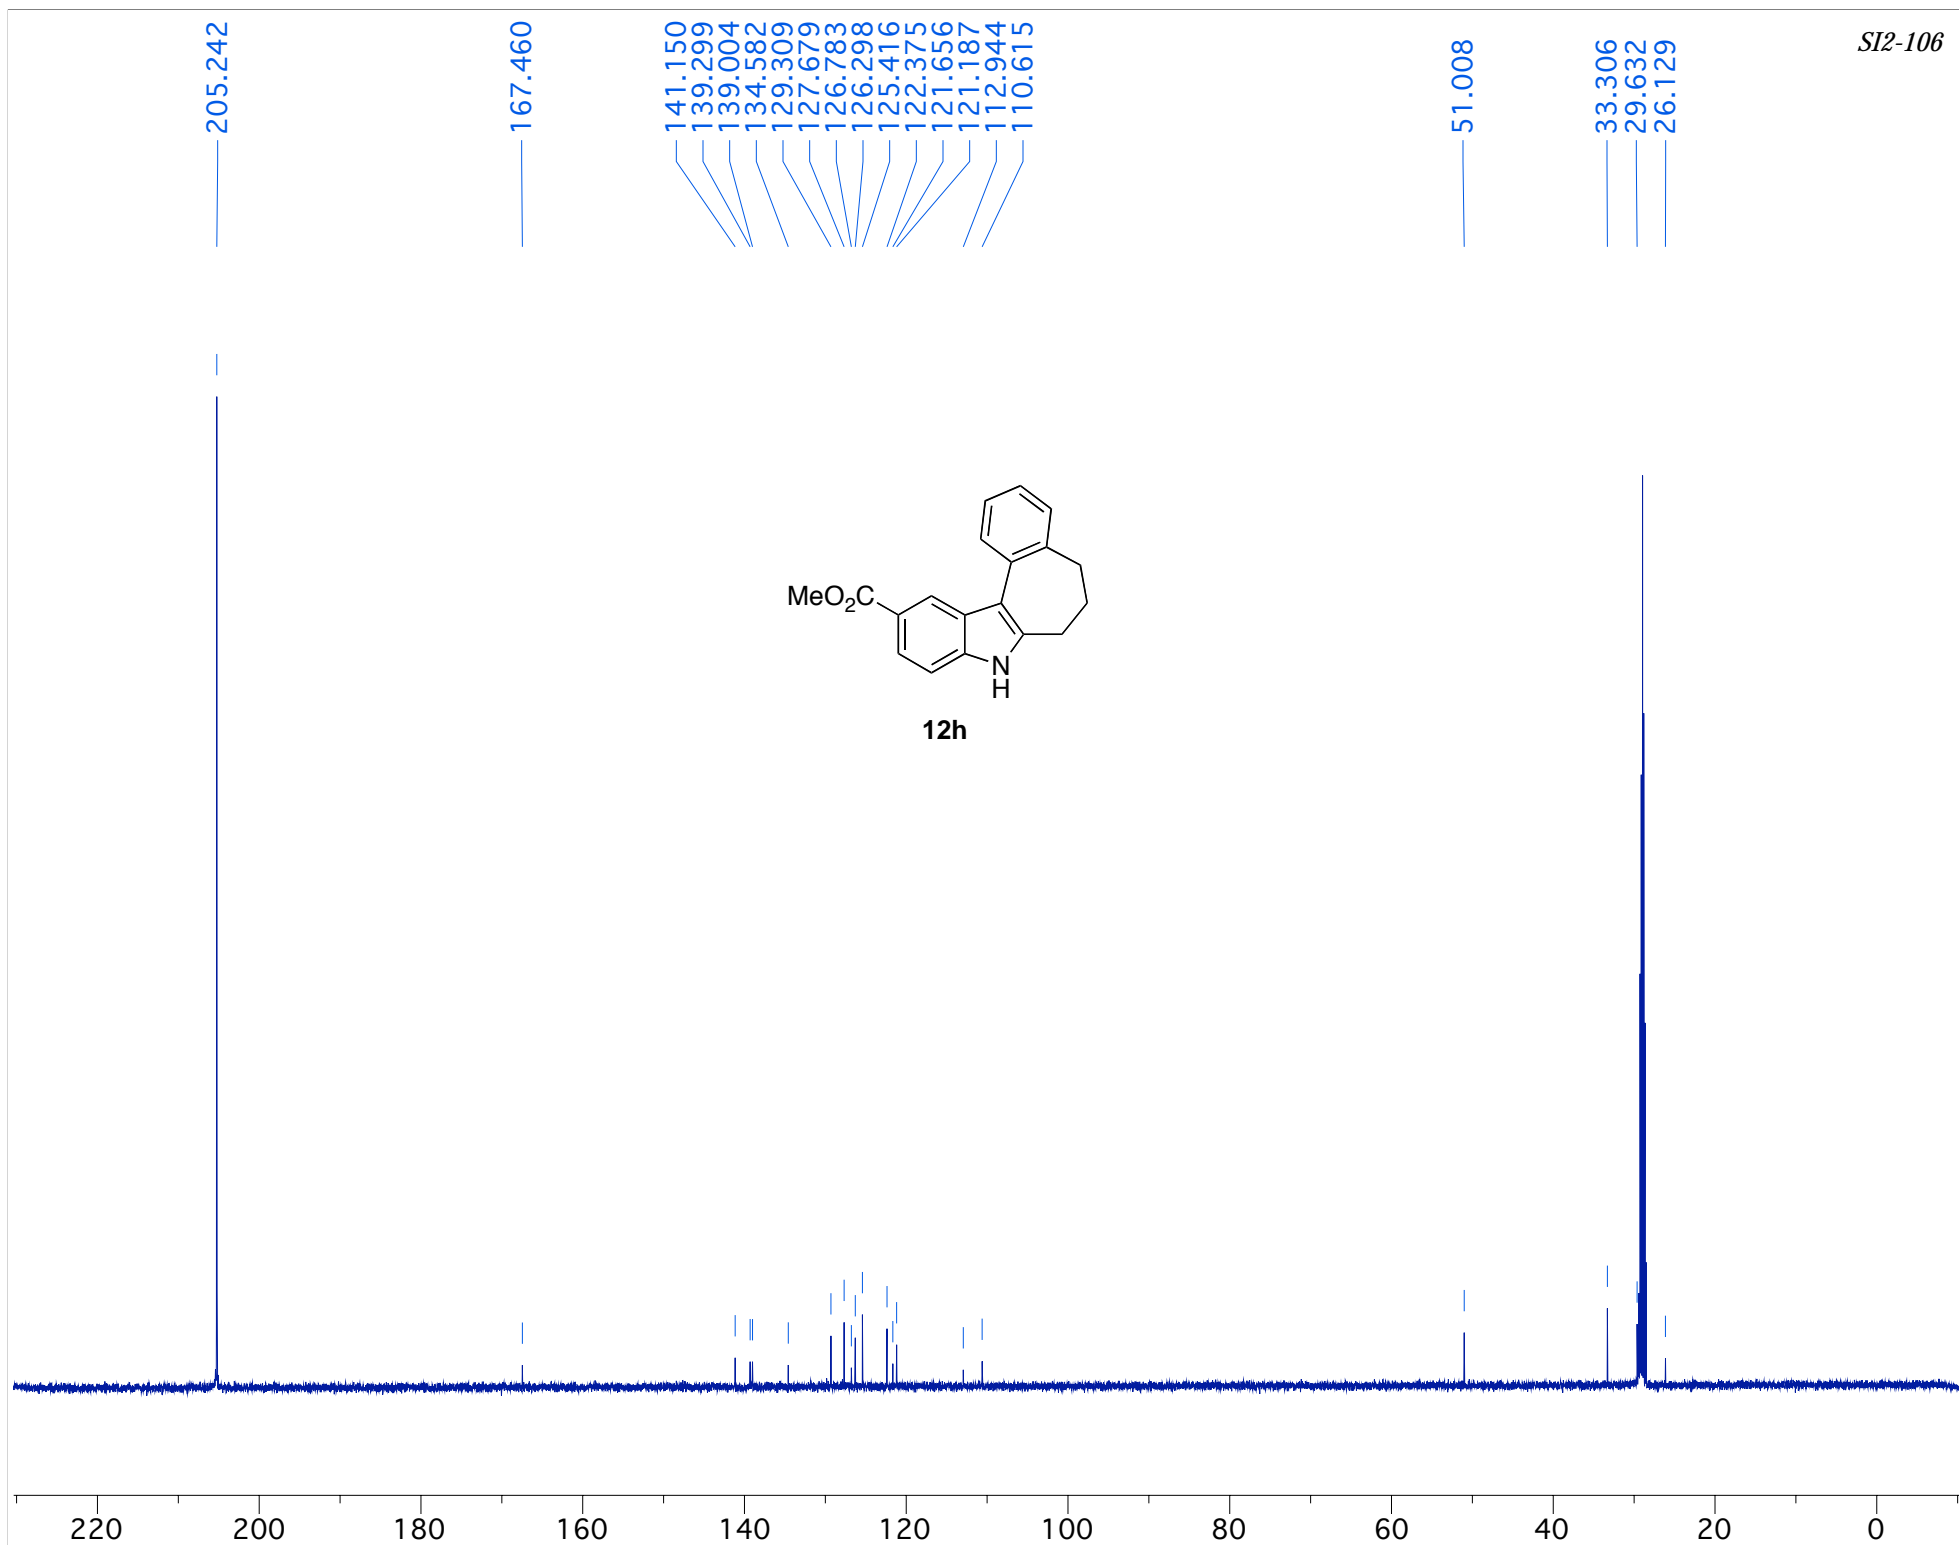

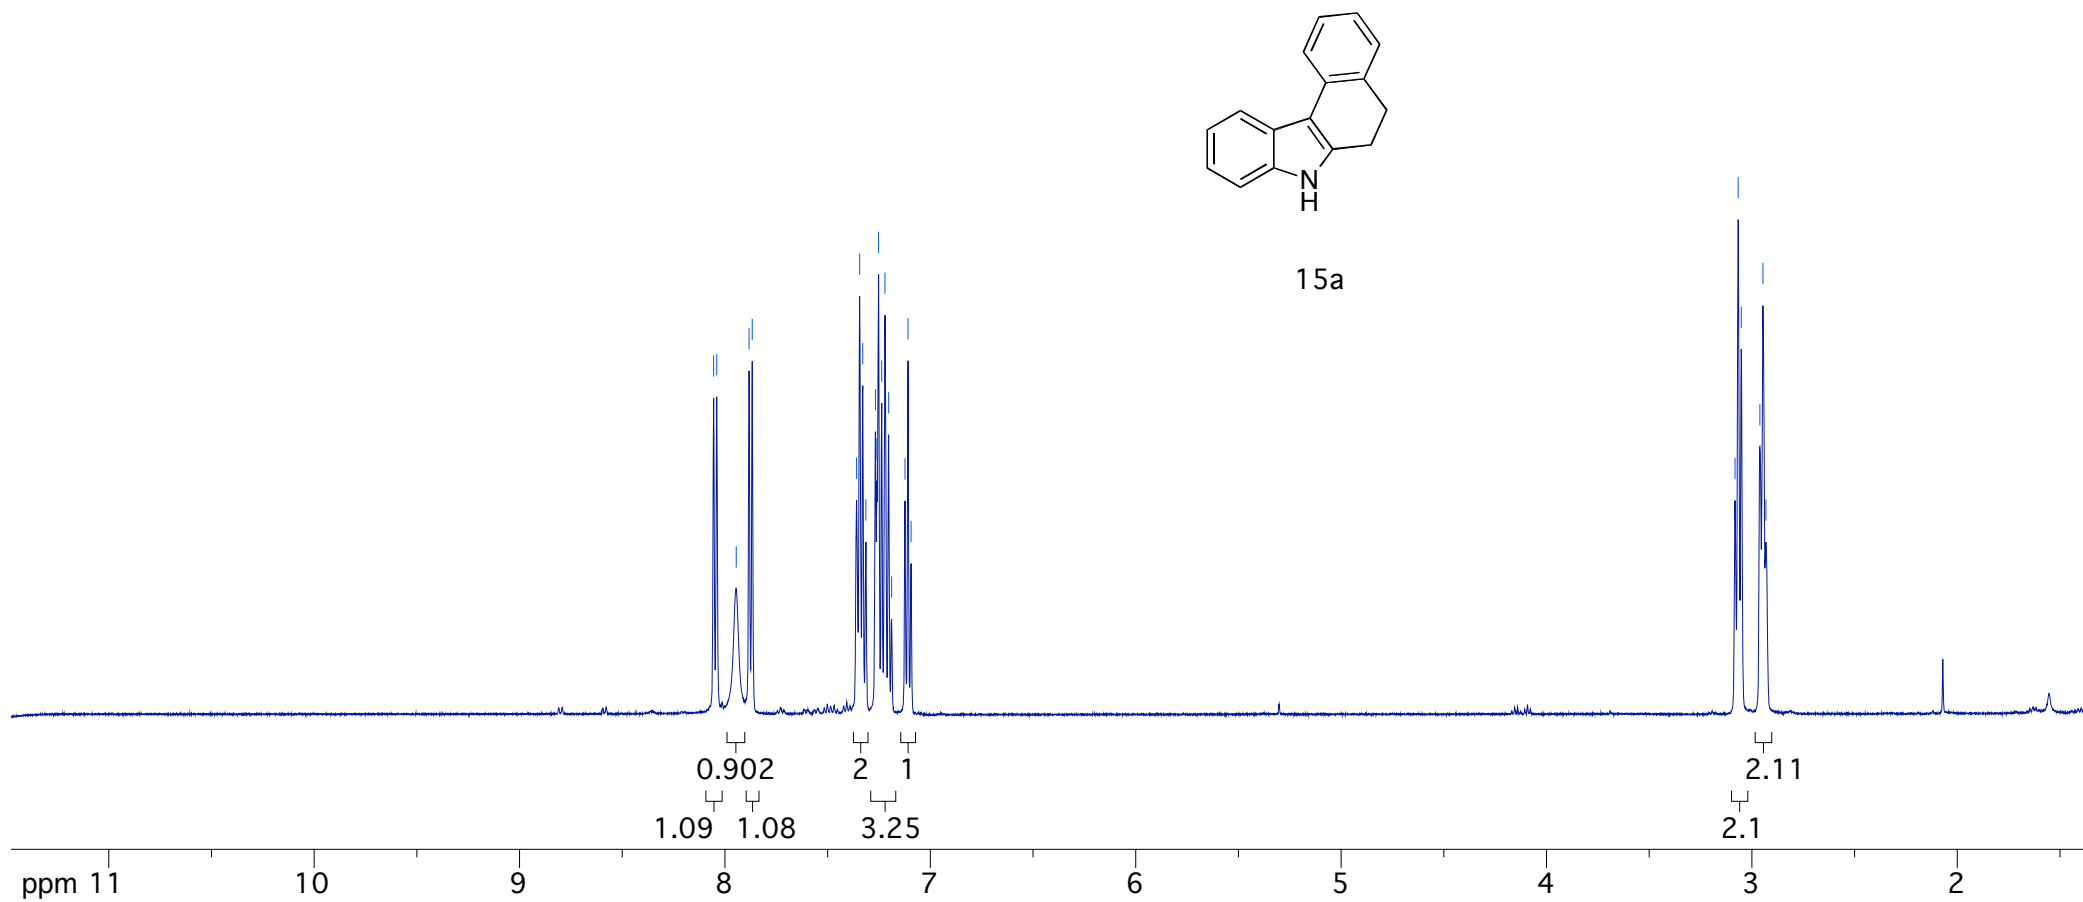

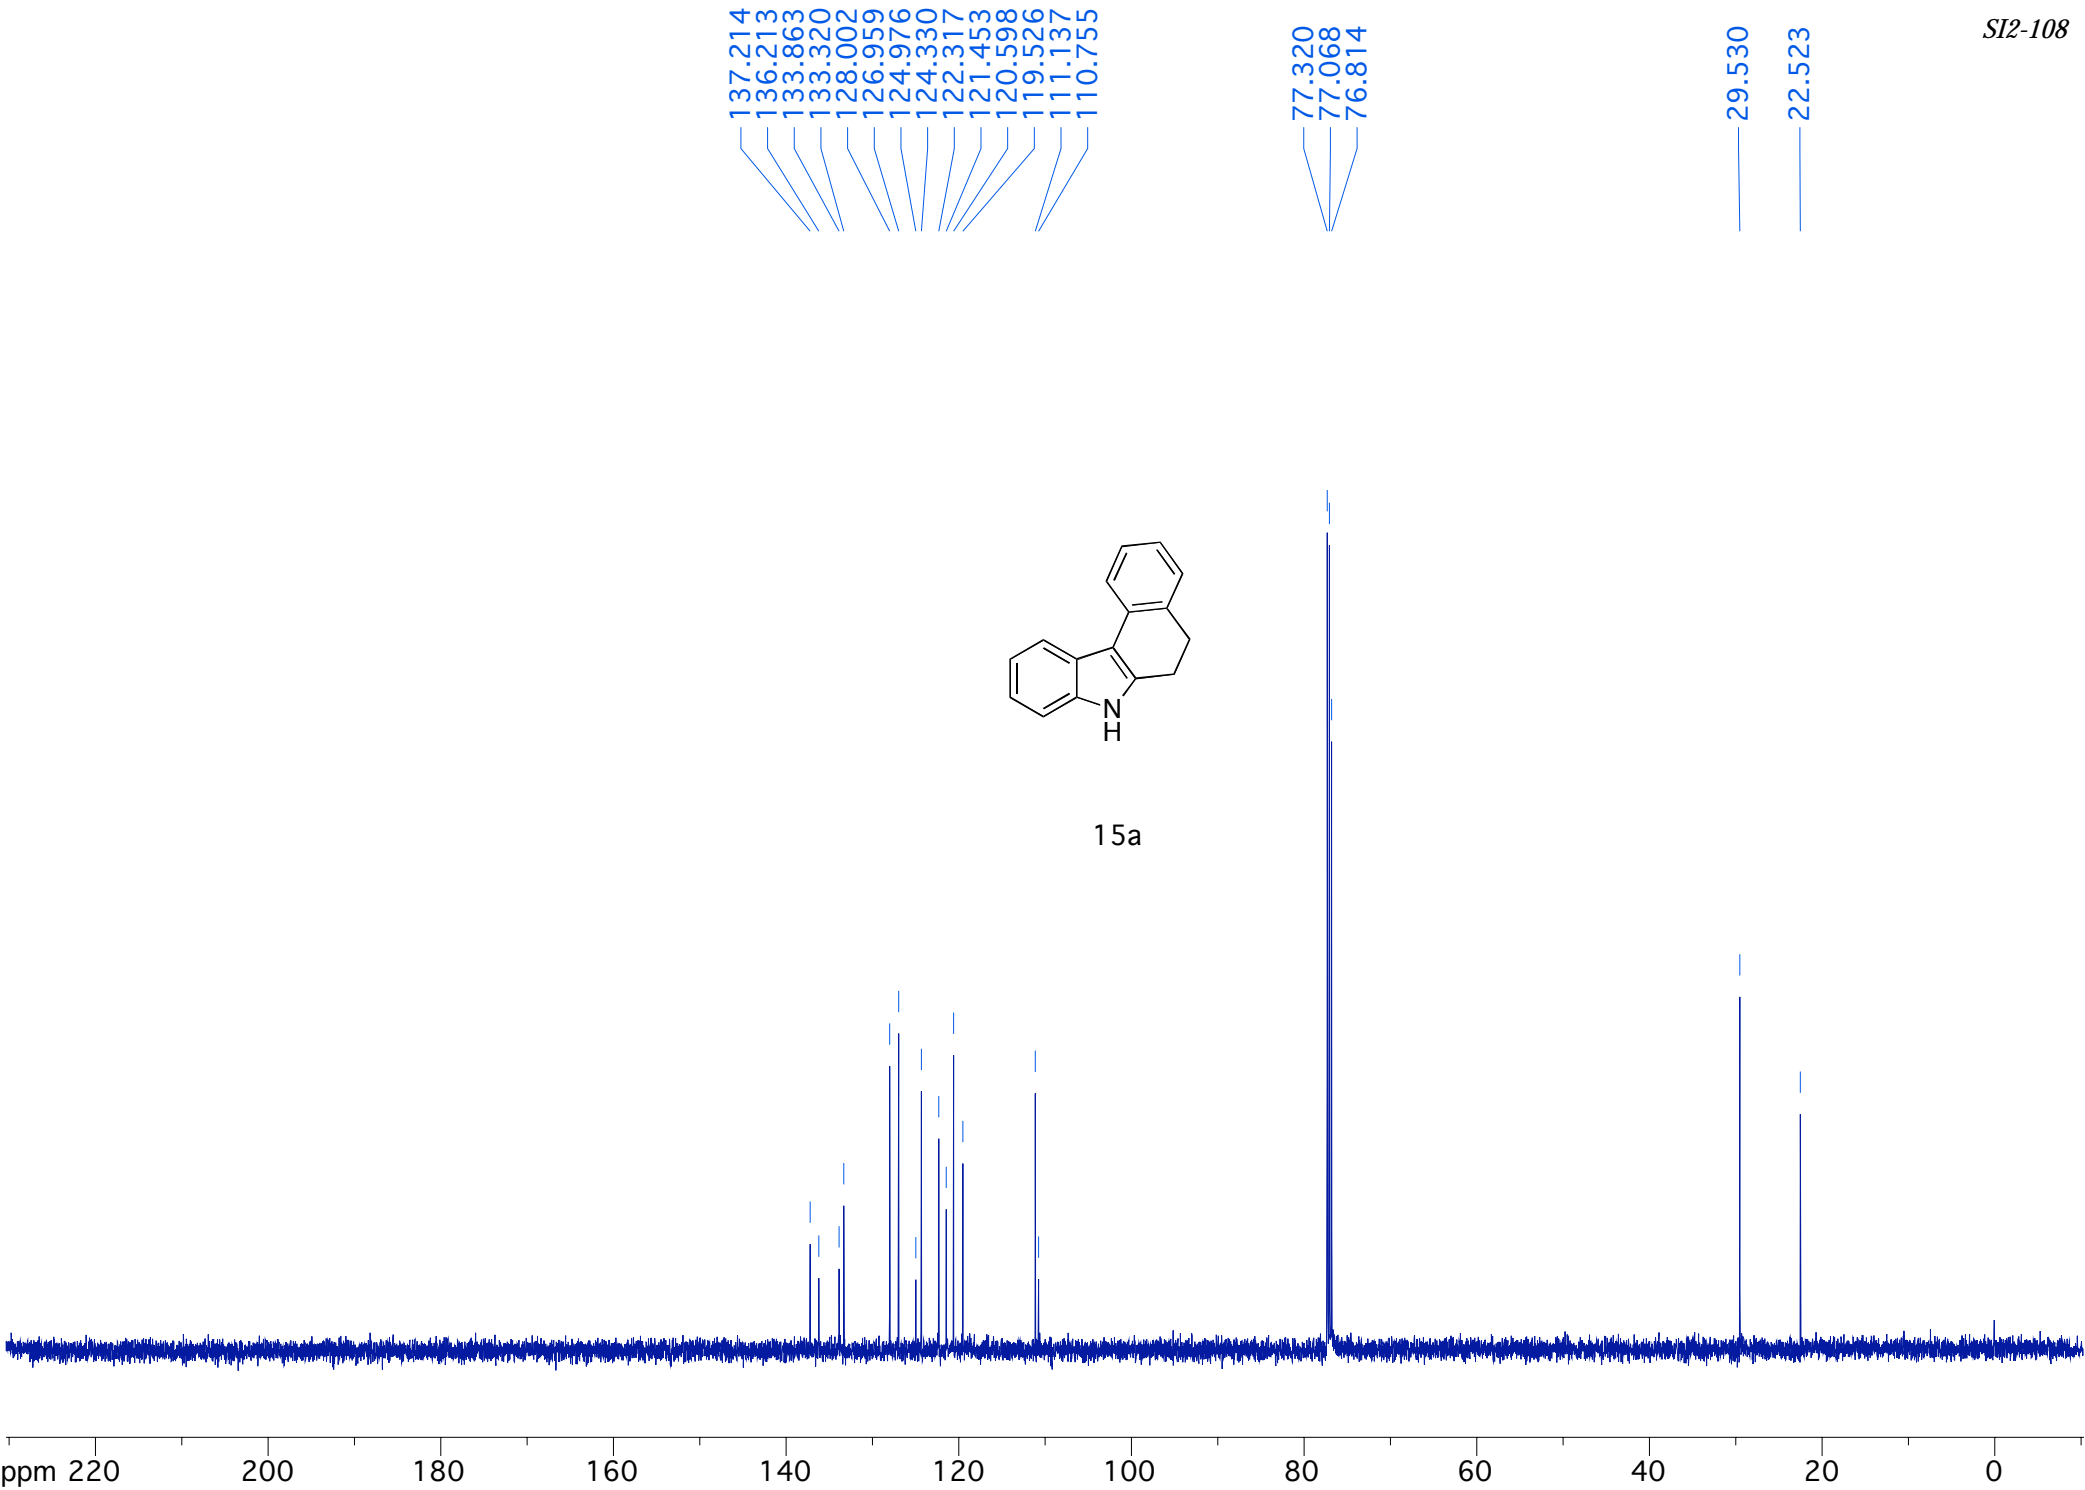

8.037  
8.022  
7.947  
7.938  
7.930  
7.446  
7.430  
7.416  
7.409  
7.398  
7.389  
7.374  
7.125  
7.116  
7.107

3.342  
3.117  
3.102  
3.087  
2.992  
2.976  
2.962  
2.484

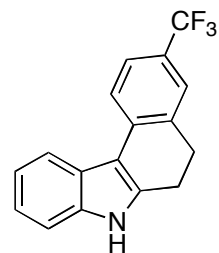

15b

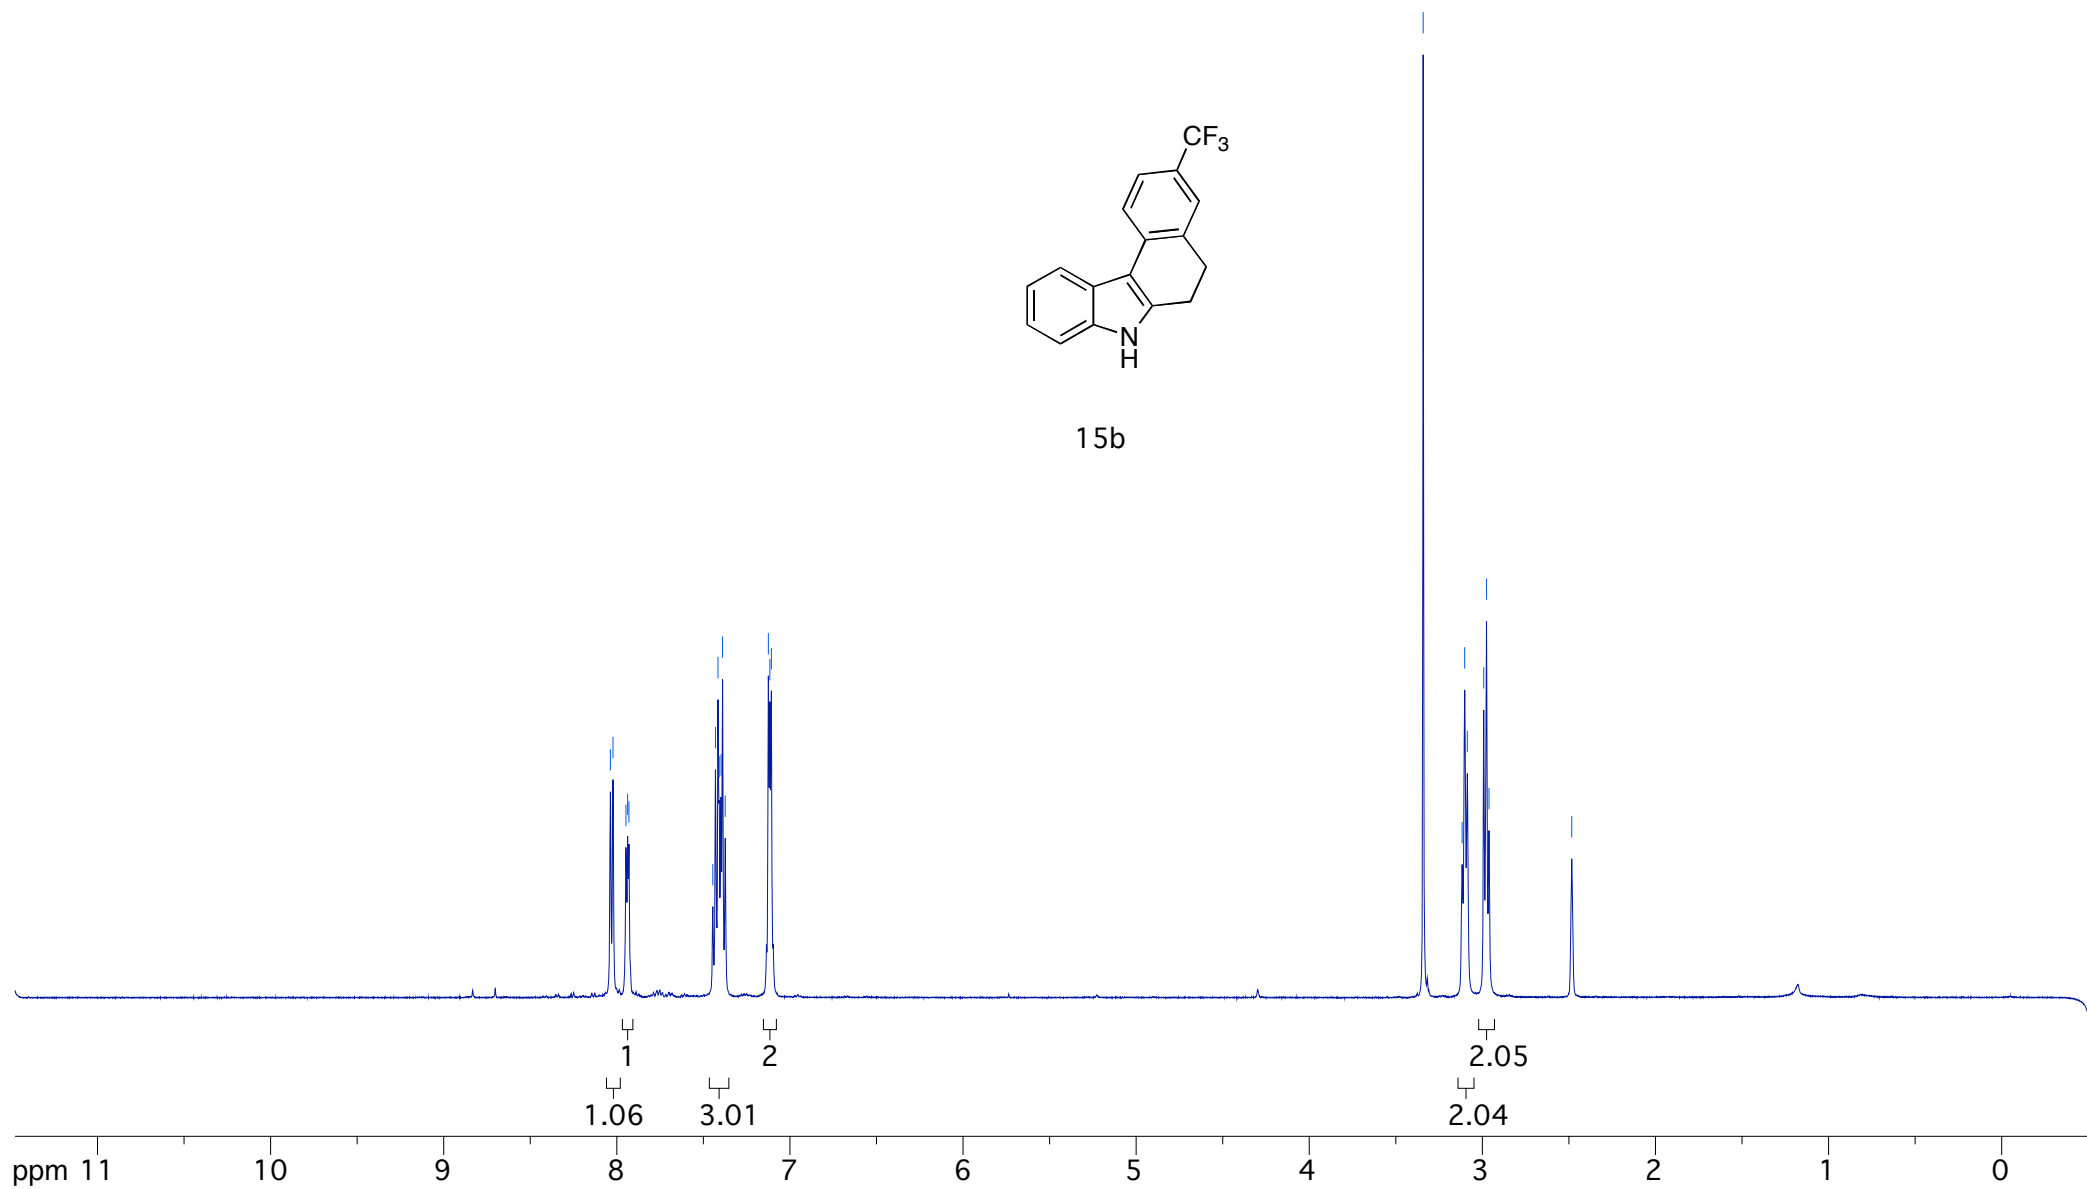

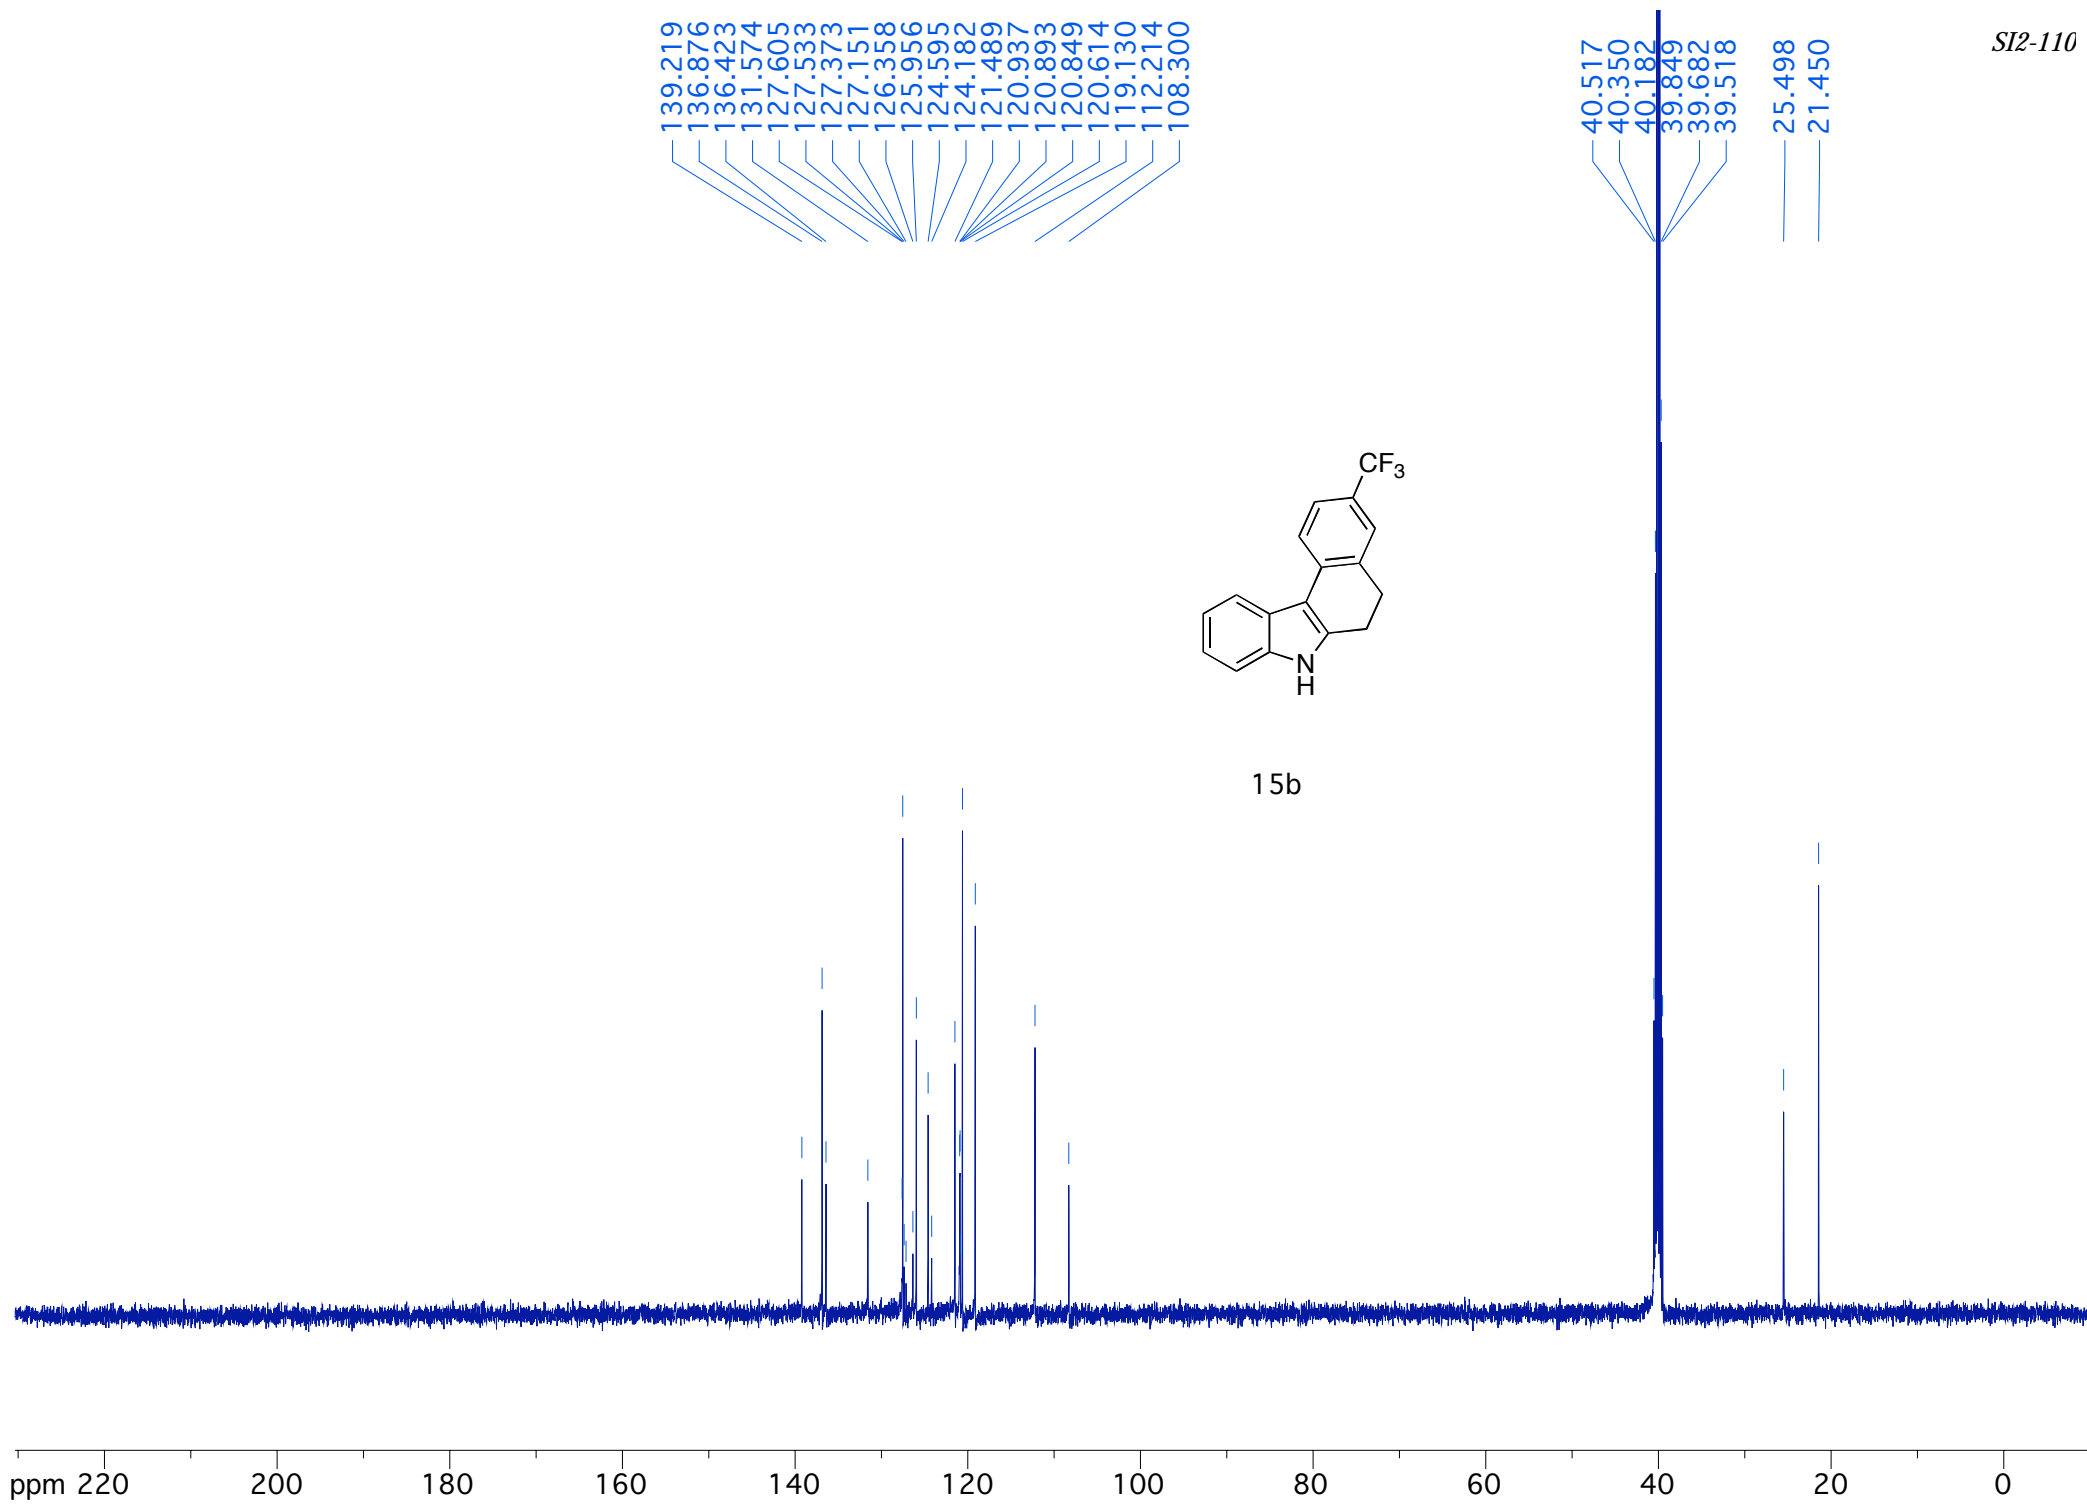

7.990  
7.570  
7.555  
7.486  
7.470  
7.370  
7.354  
7.260  
7.240  
7.226  
7.211  
7.161  
7.146  
7.132  
6.853  
6.848  
6.836  
6.831  
6.821  
6.816

3.857

3.120  
3.106  
3.092  
2.905  
2.895  
2.885  
2.193  
2.179  
2.171  
2.167  
2.158  
2.144

SI2-111

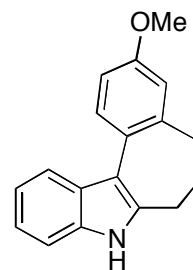

15c

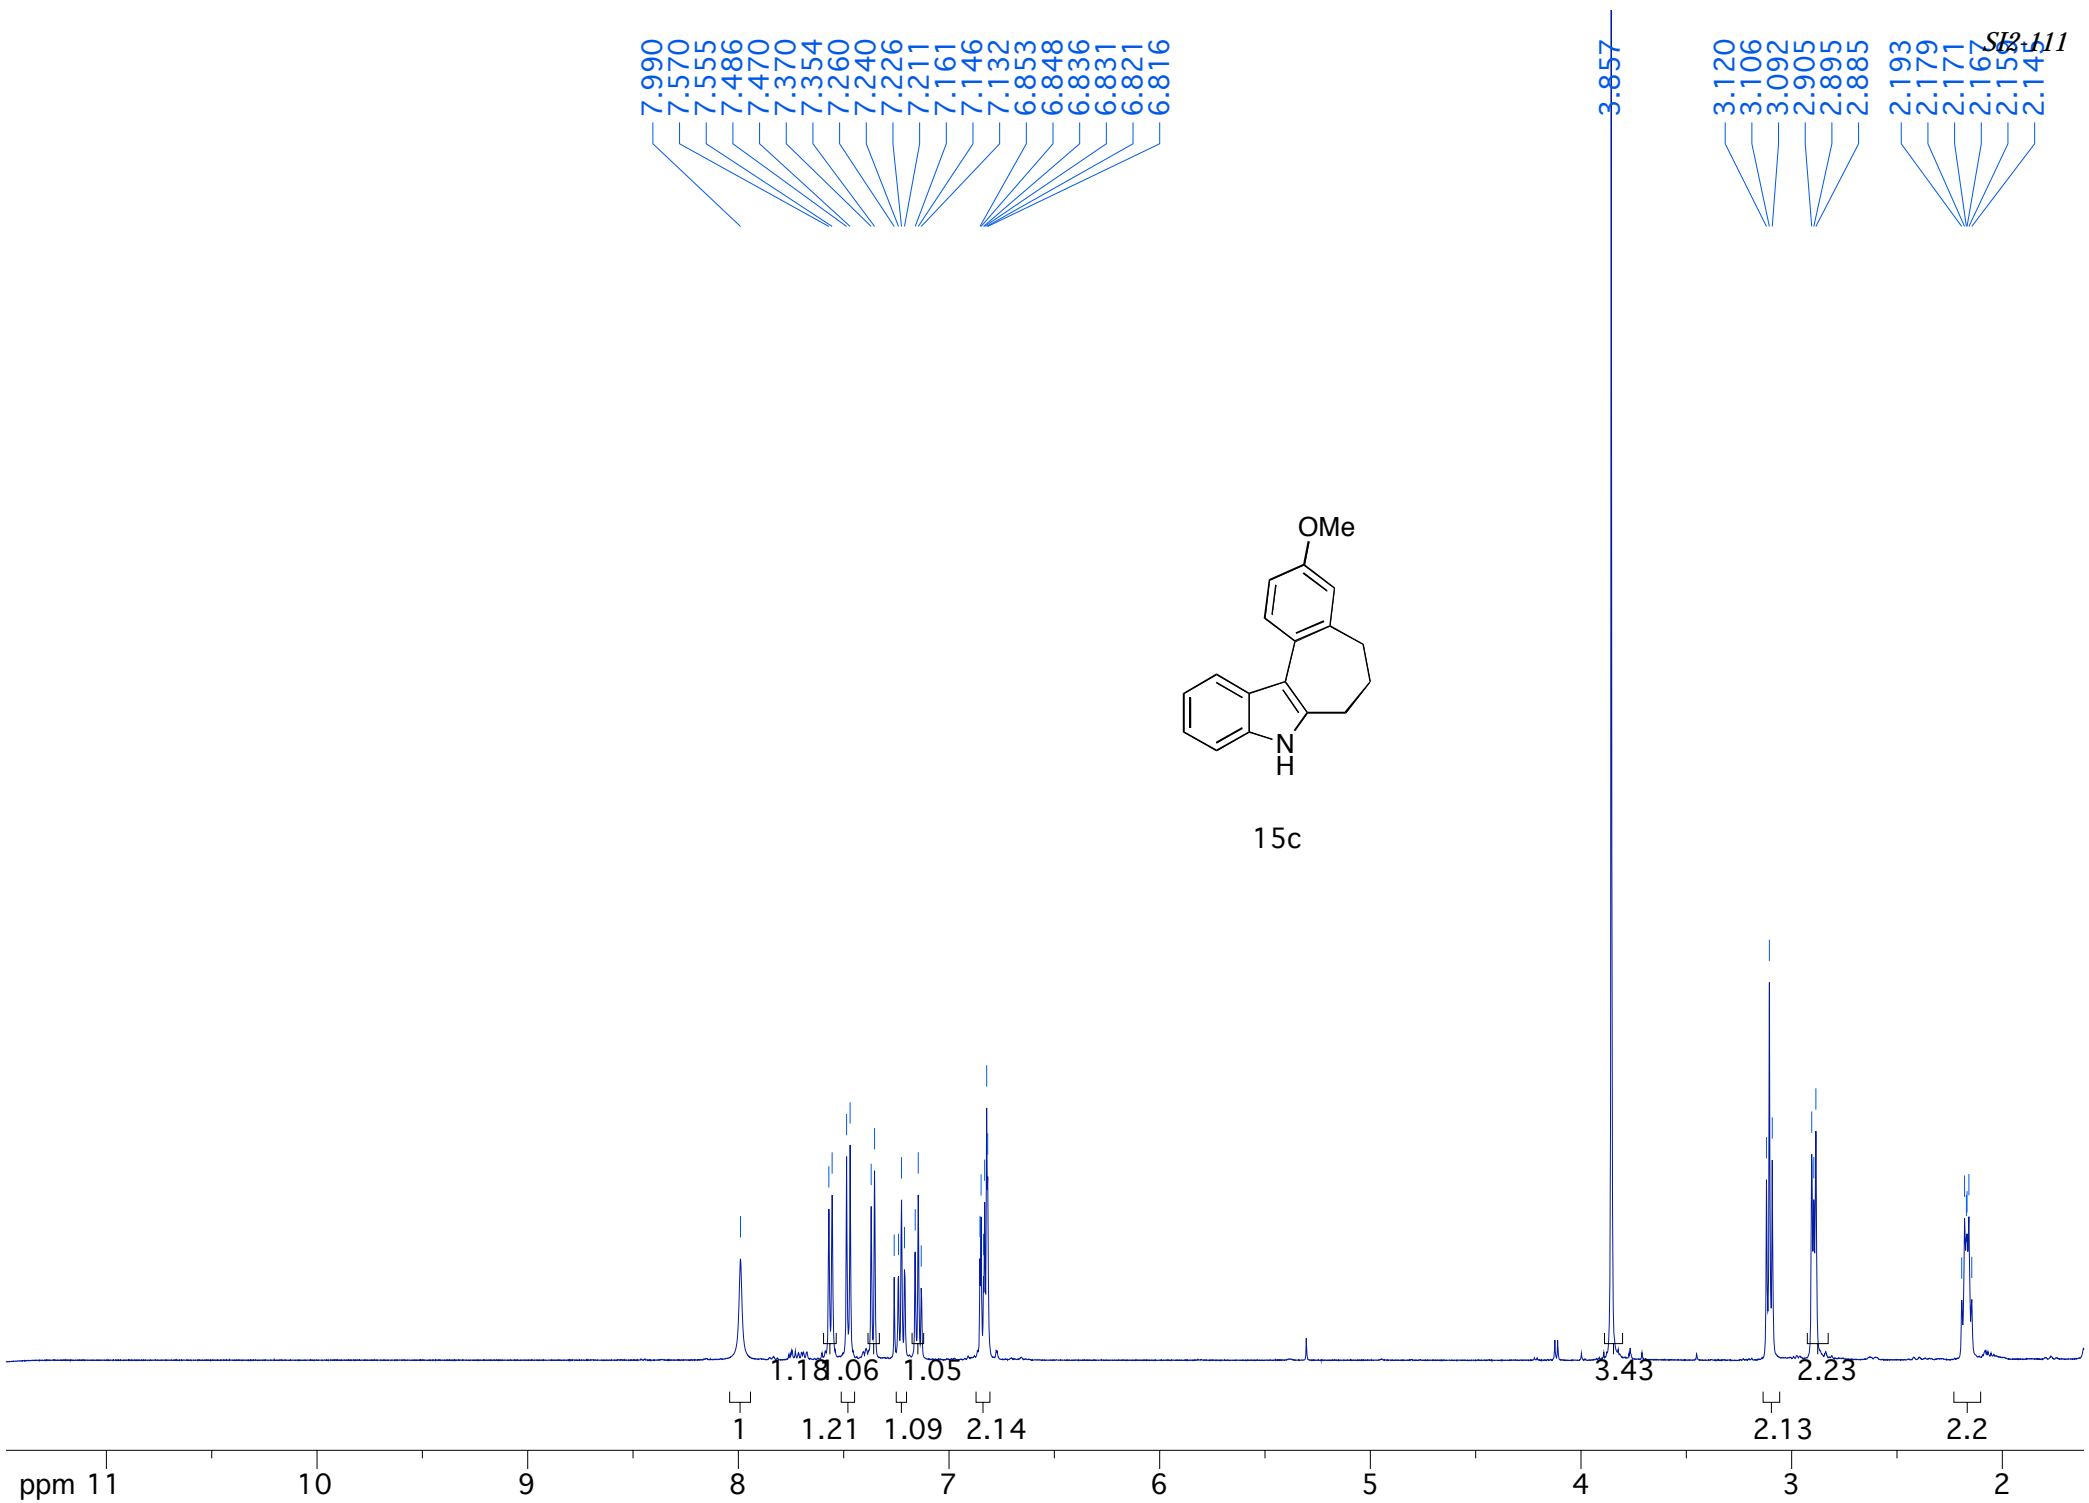

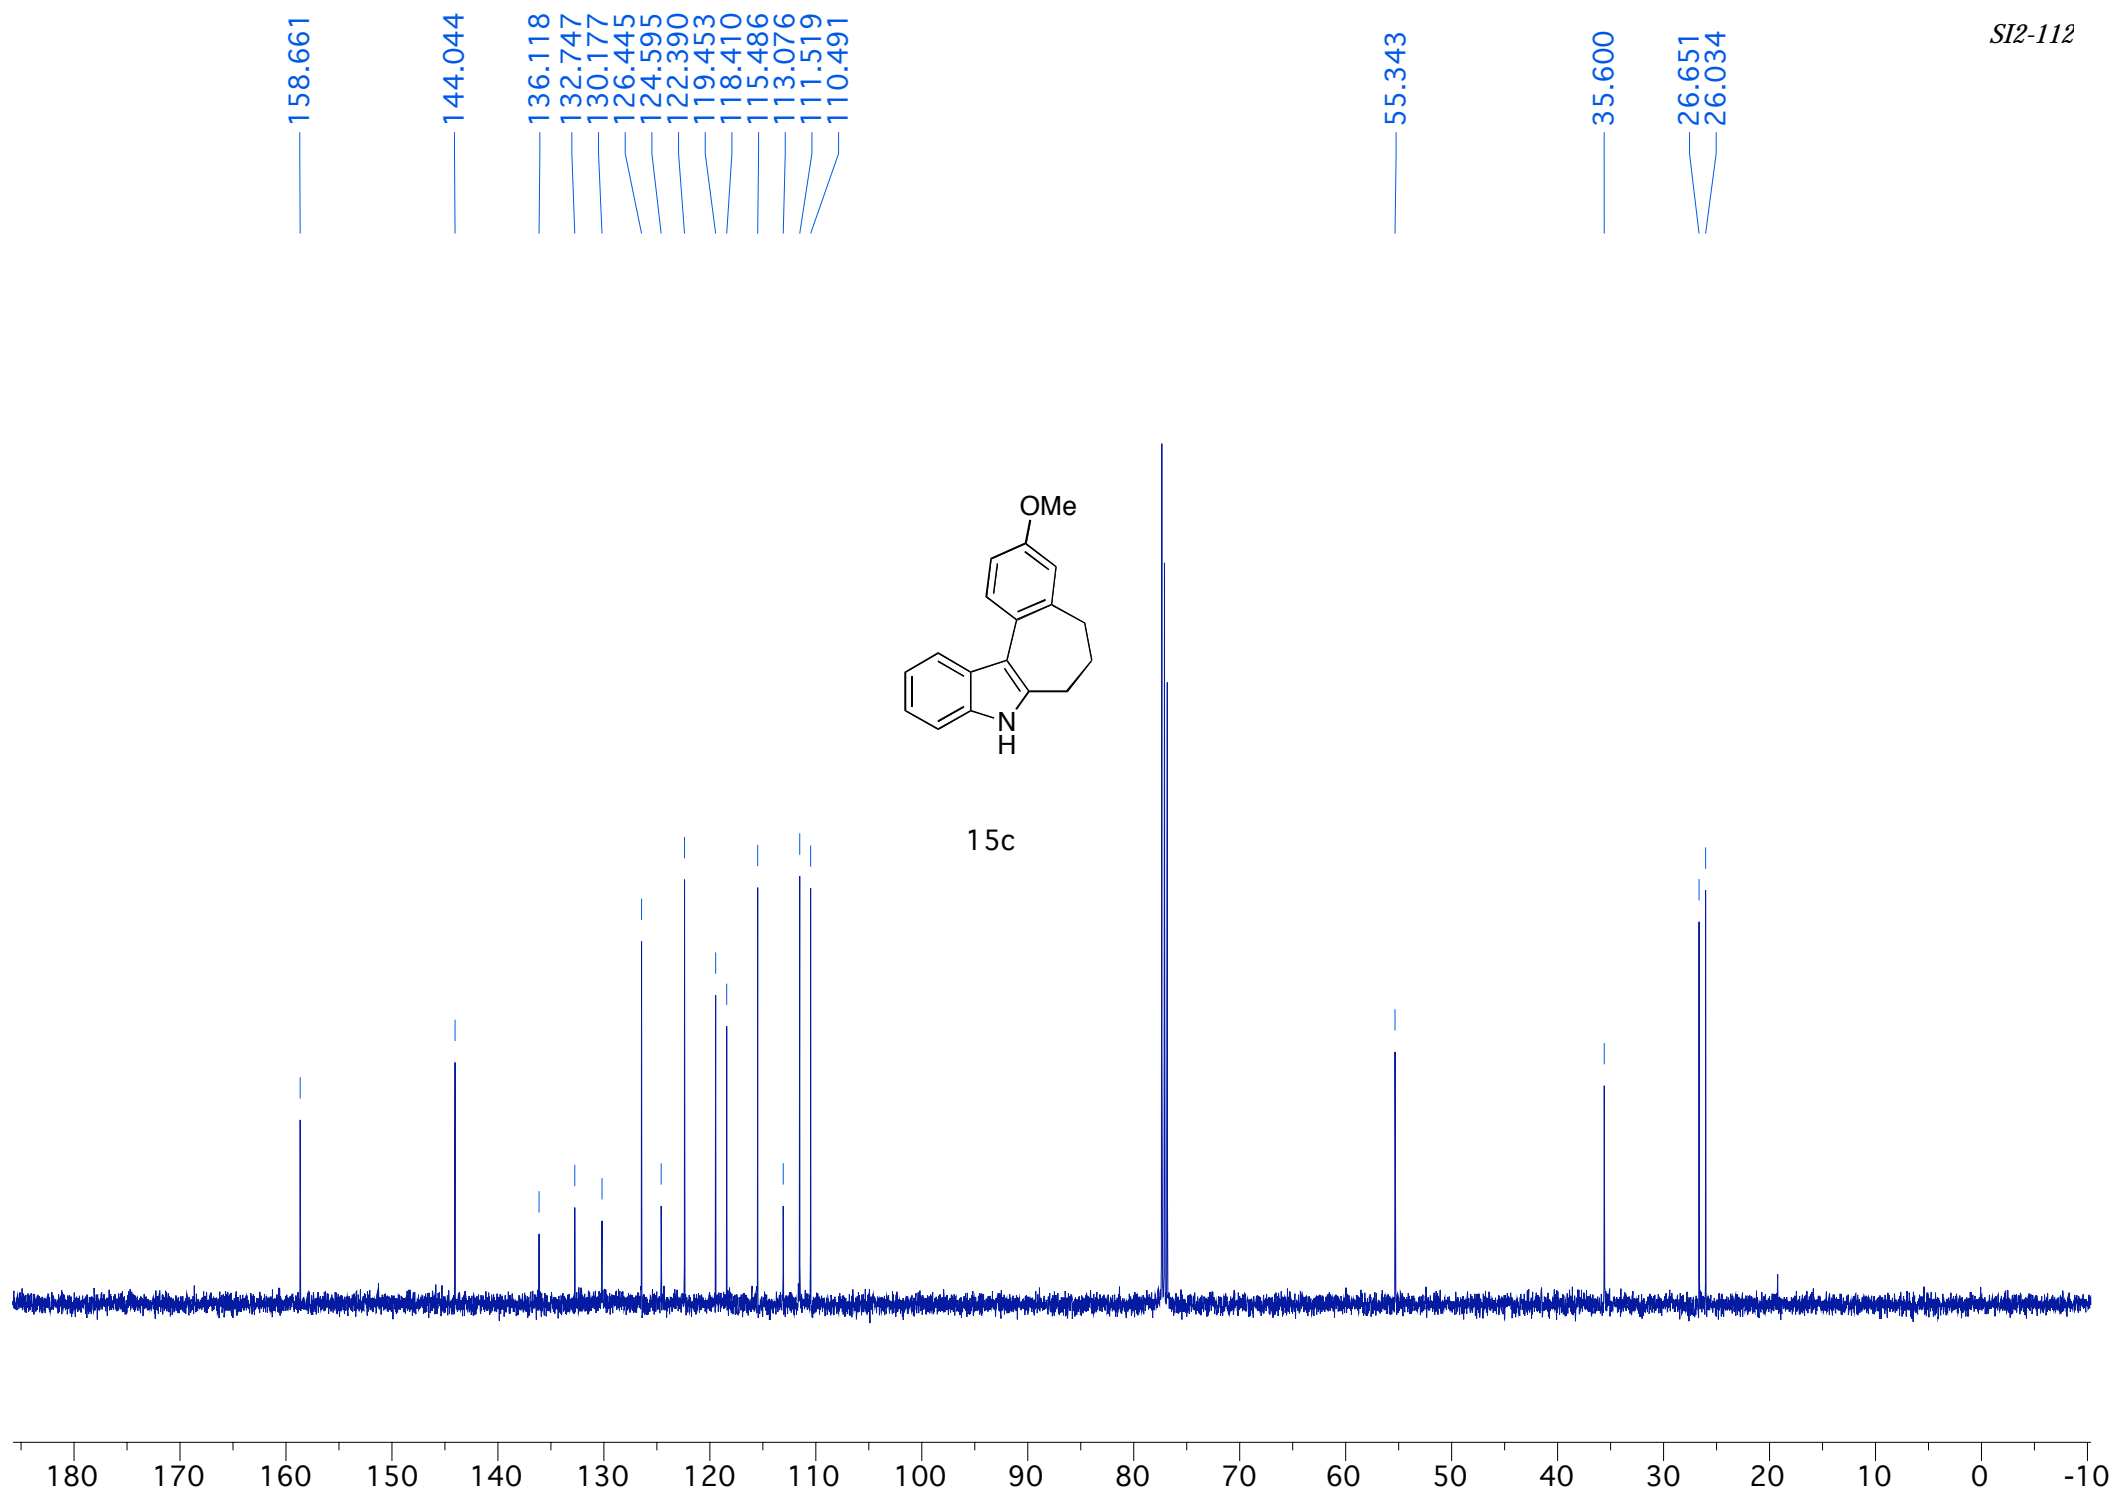



8.145  
8.130  
8.104  
8.089  
8.037  
7.320  
7.318  
7.316  
7.307  
7.305  
7.303  
7.260  
7.259  
7.254  
7.253  
7.251  
7.239  
7.237  
7.235  
7.225  
7.221  
7.220  
7.208  
7.204  
7.193  
7.190  
7.179  
7.177  
7.164  
7.163  
7.161  
7.151  
7.148  
7.144  
7.140  
7.128  
7.124

4.399  
4.387  
4.375

3.327  
3.315  
3.304

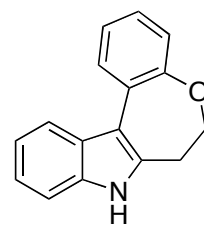

15d

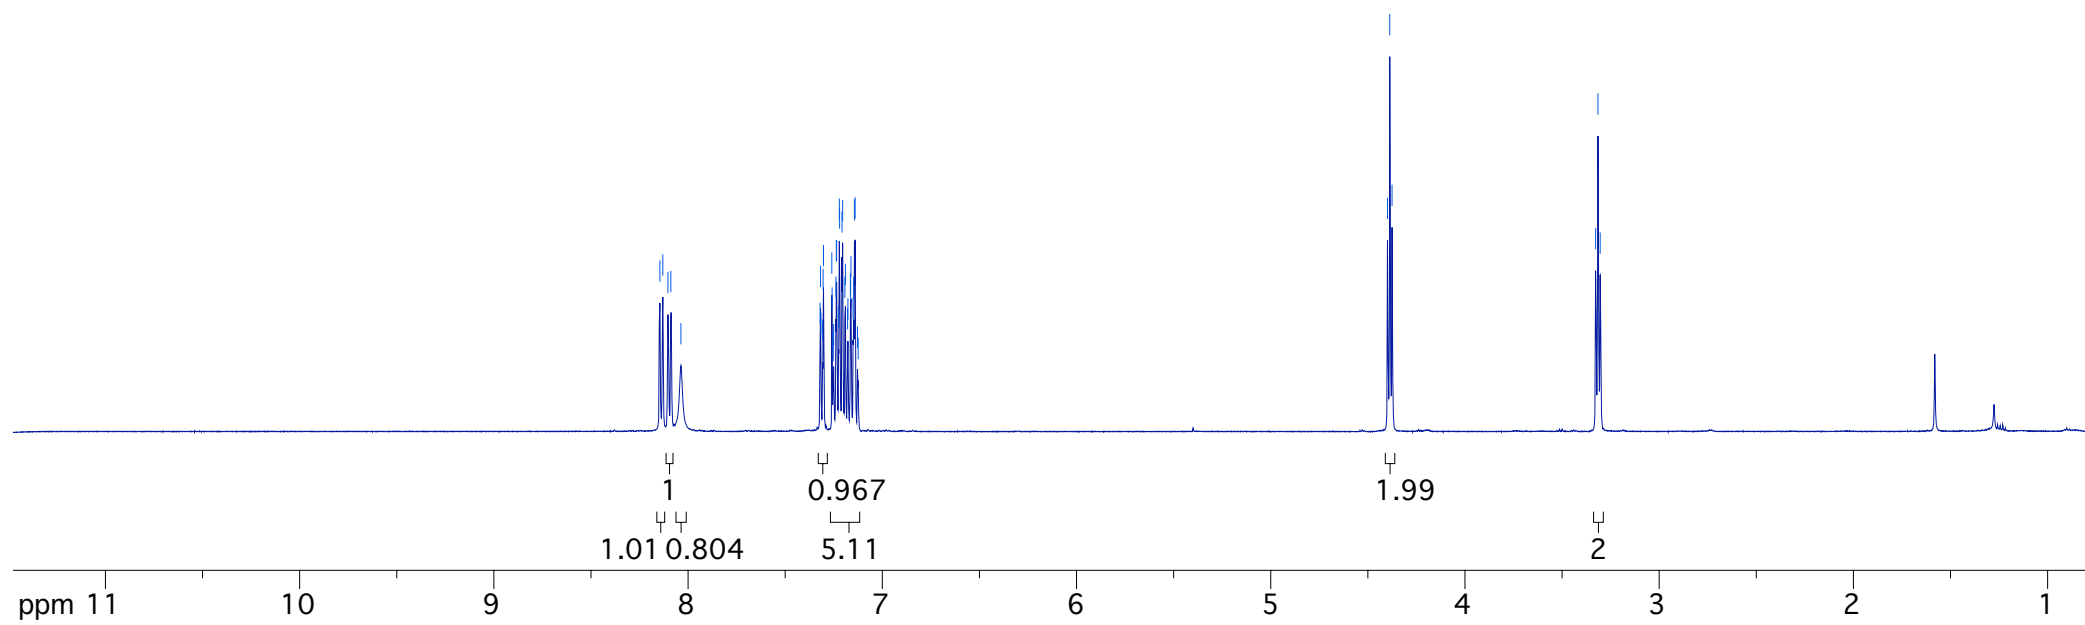

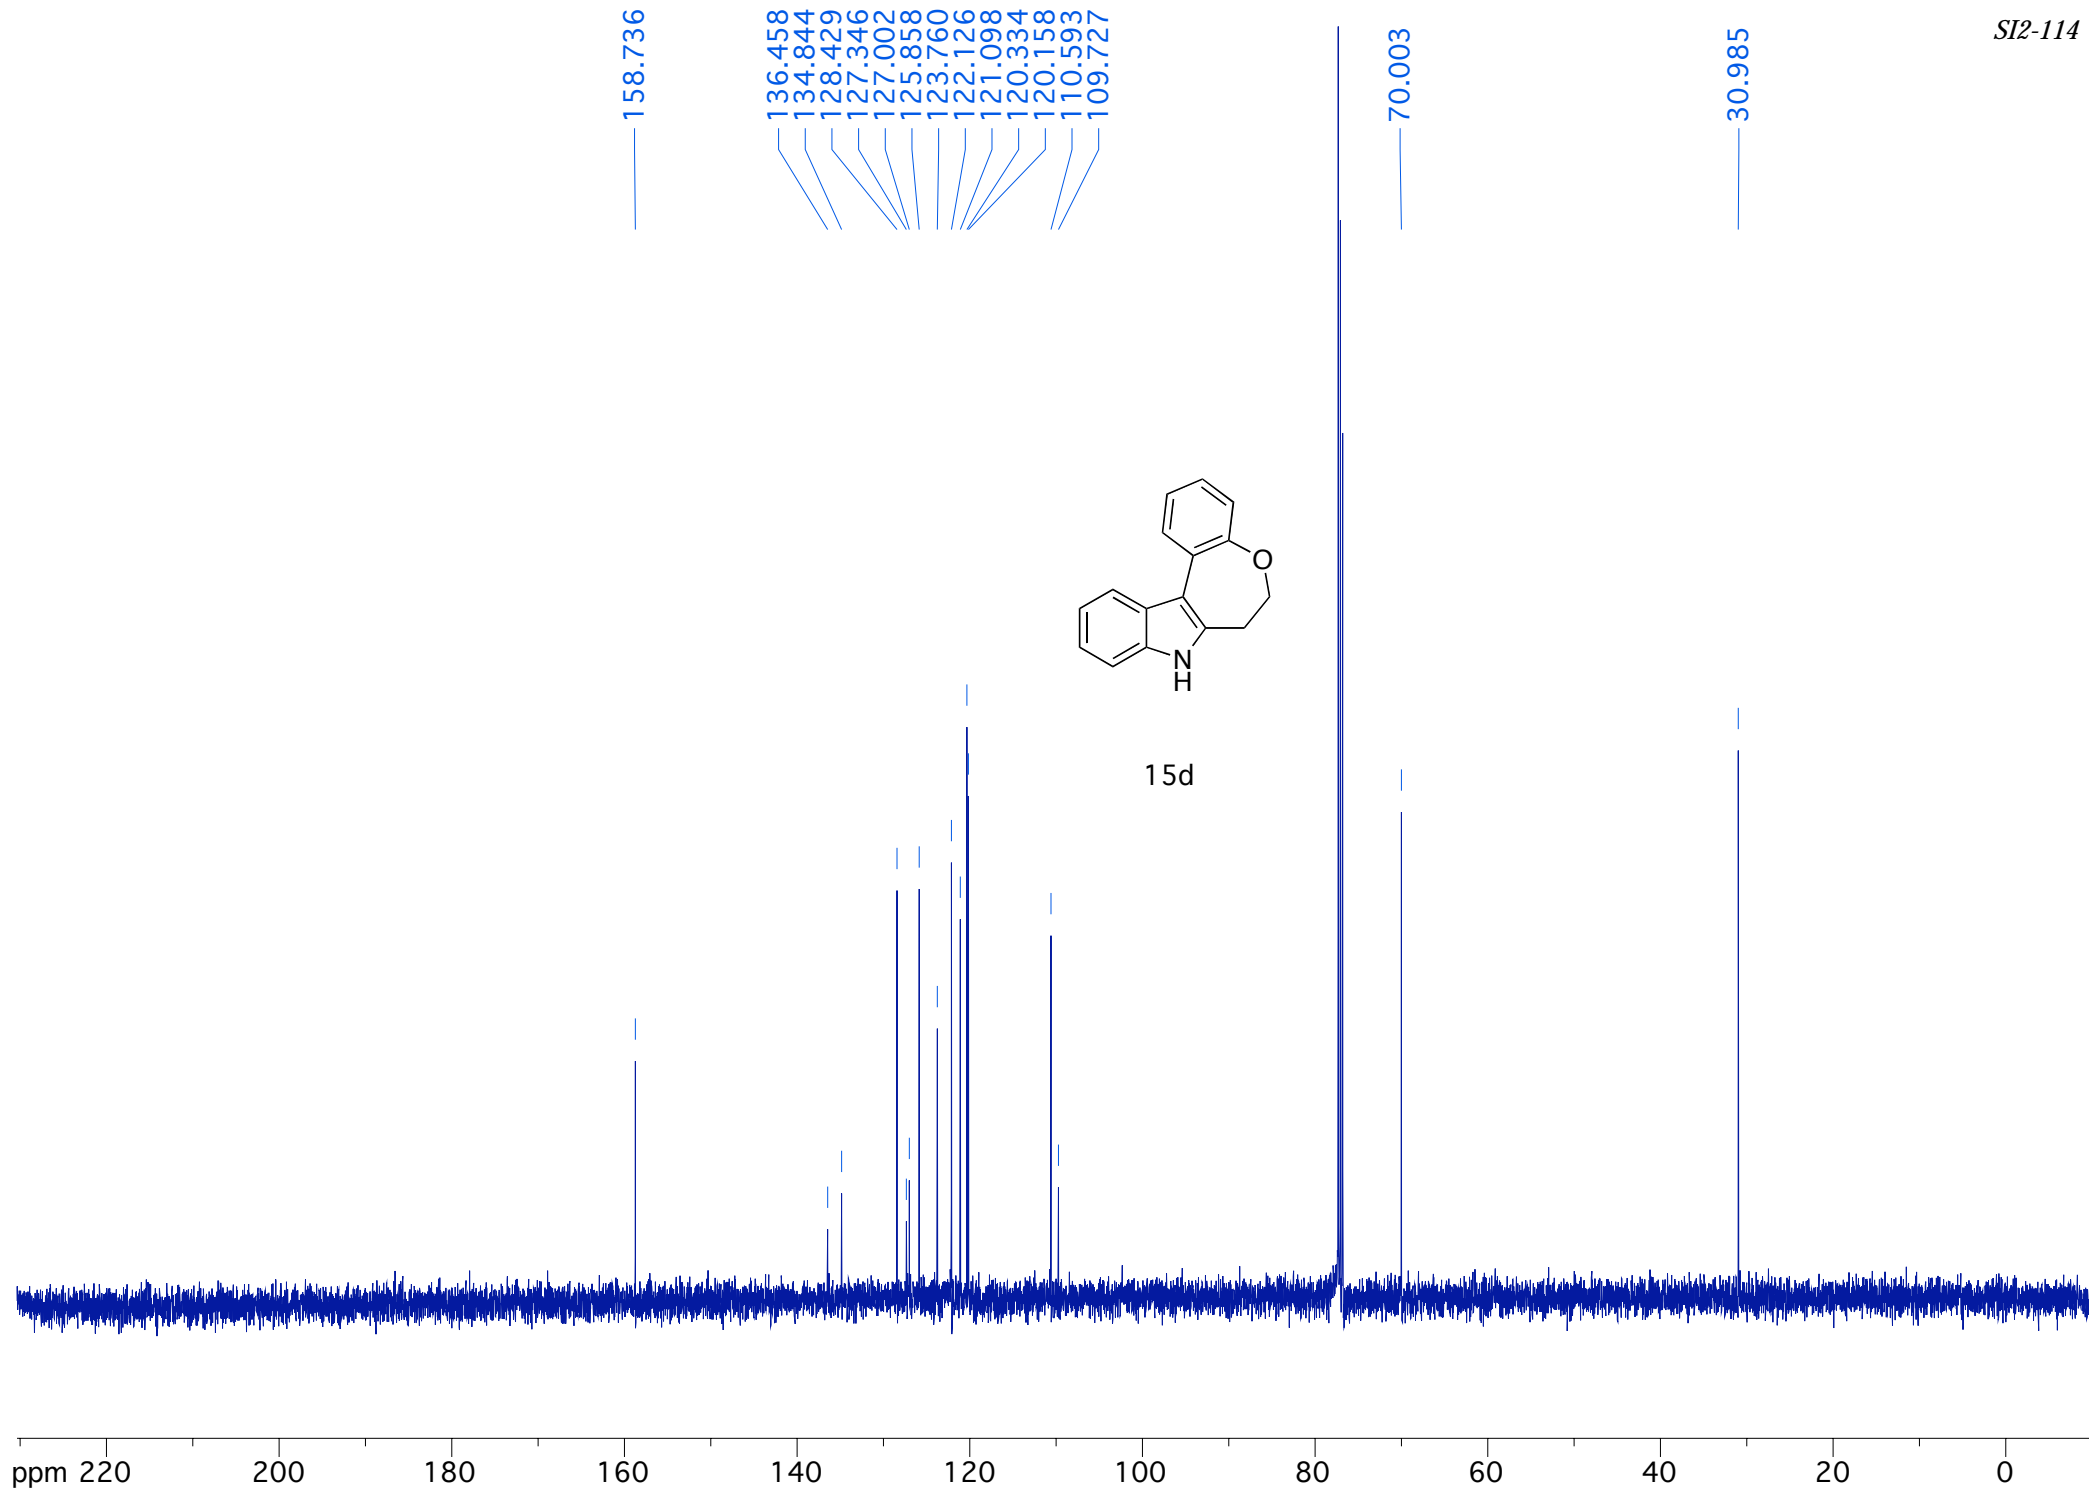

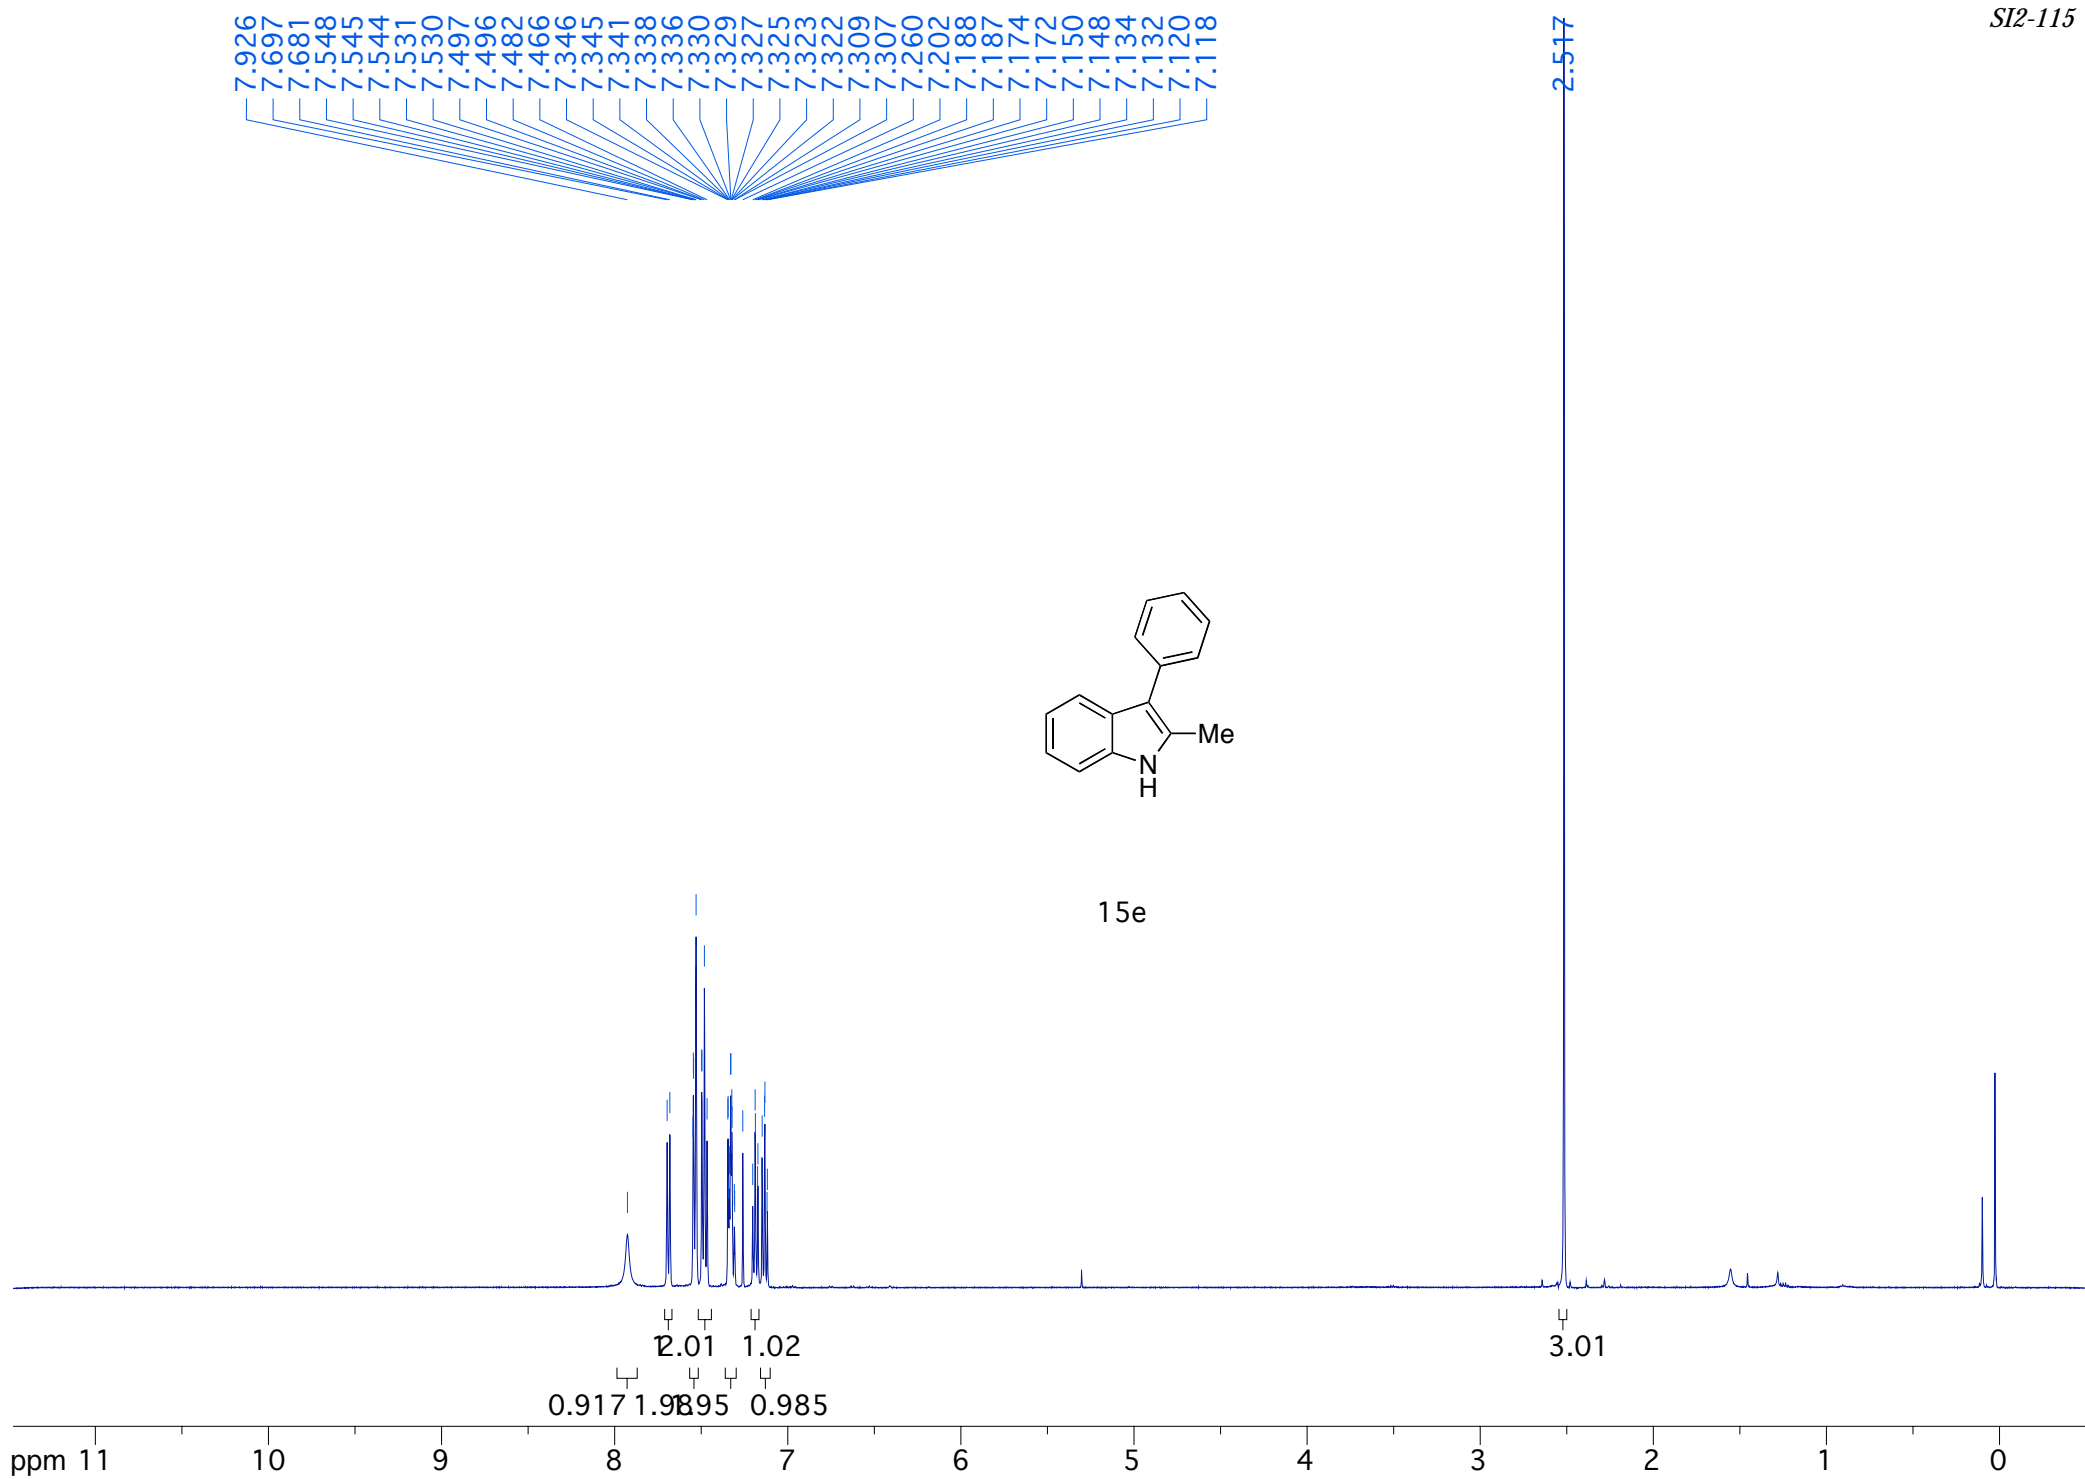

135.465  
135.258  
131.425  
129.456  
128.516  
127.899  
125.828  
121.568  
120.006  
118.835  
114.574  
110.314

77.314  
77.056  
76.805

12.577

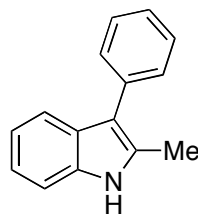

15e

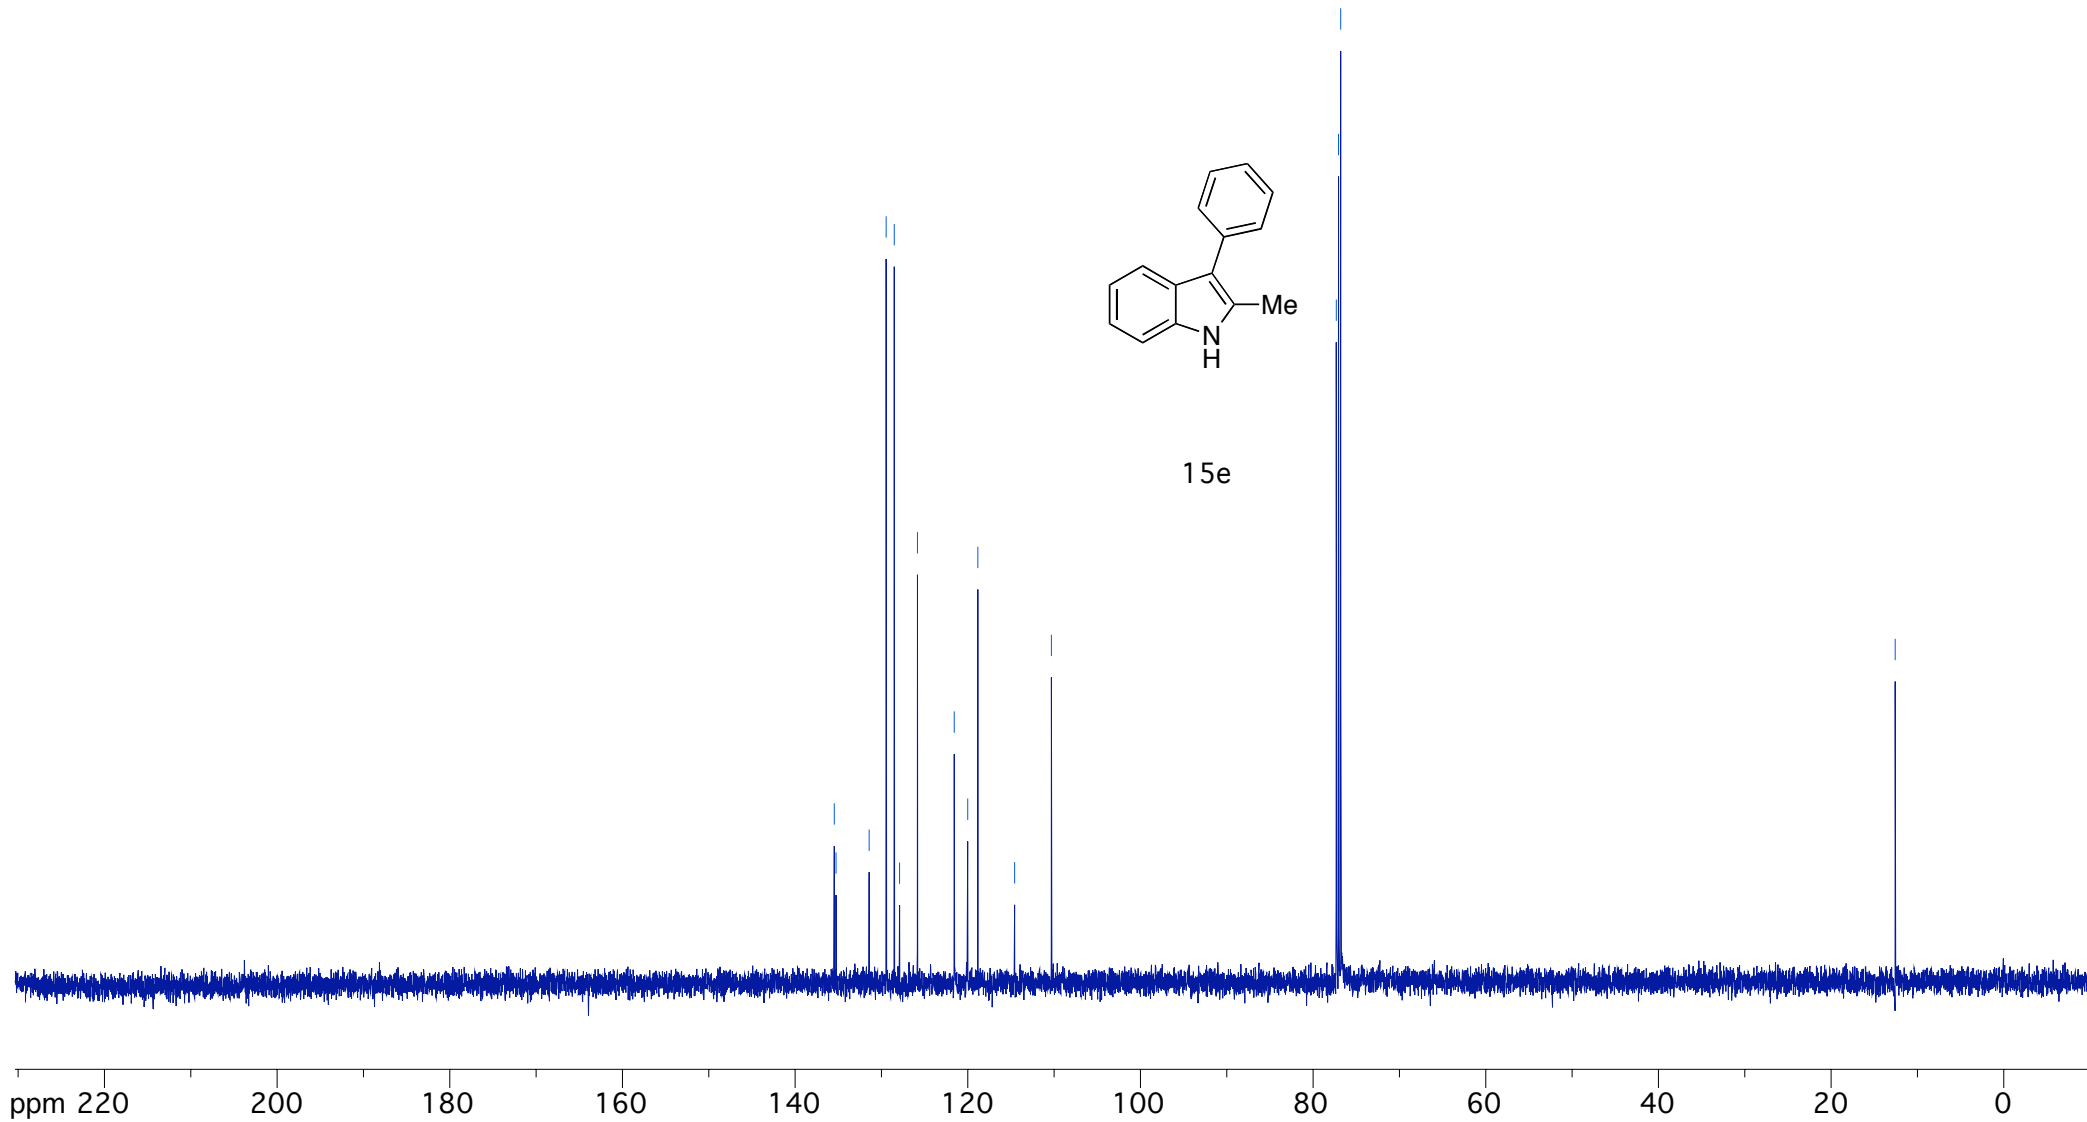

8.015  
7.733  
7.716  
7.672  
7.657  
7.640  
7.624  
7.366  
7.350  
7.260  
7.232  
7.230  
7.216  
7.202  
7.200  
7.177  
7.175  
7.162  
7.148  
7.146

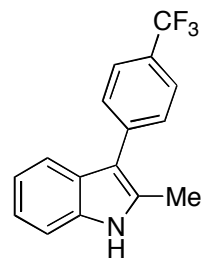

15f

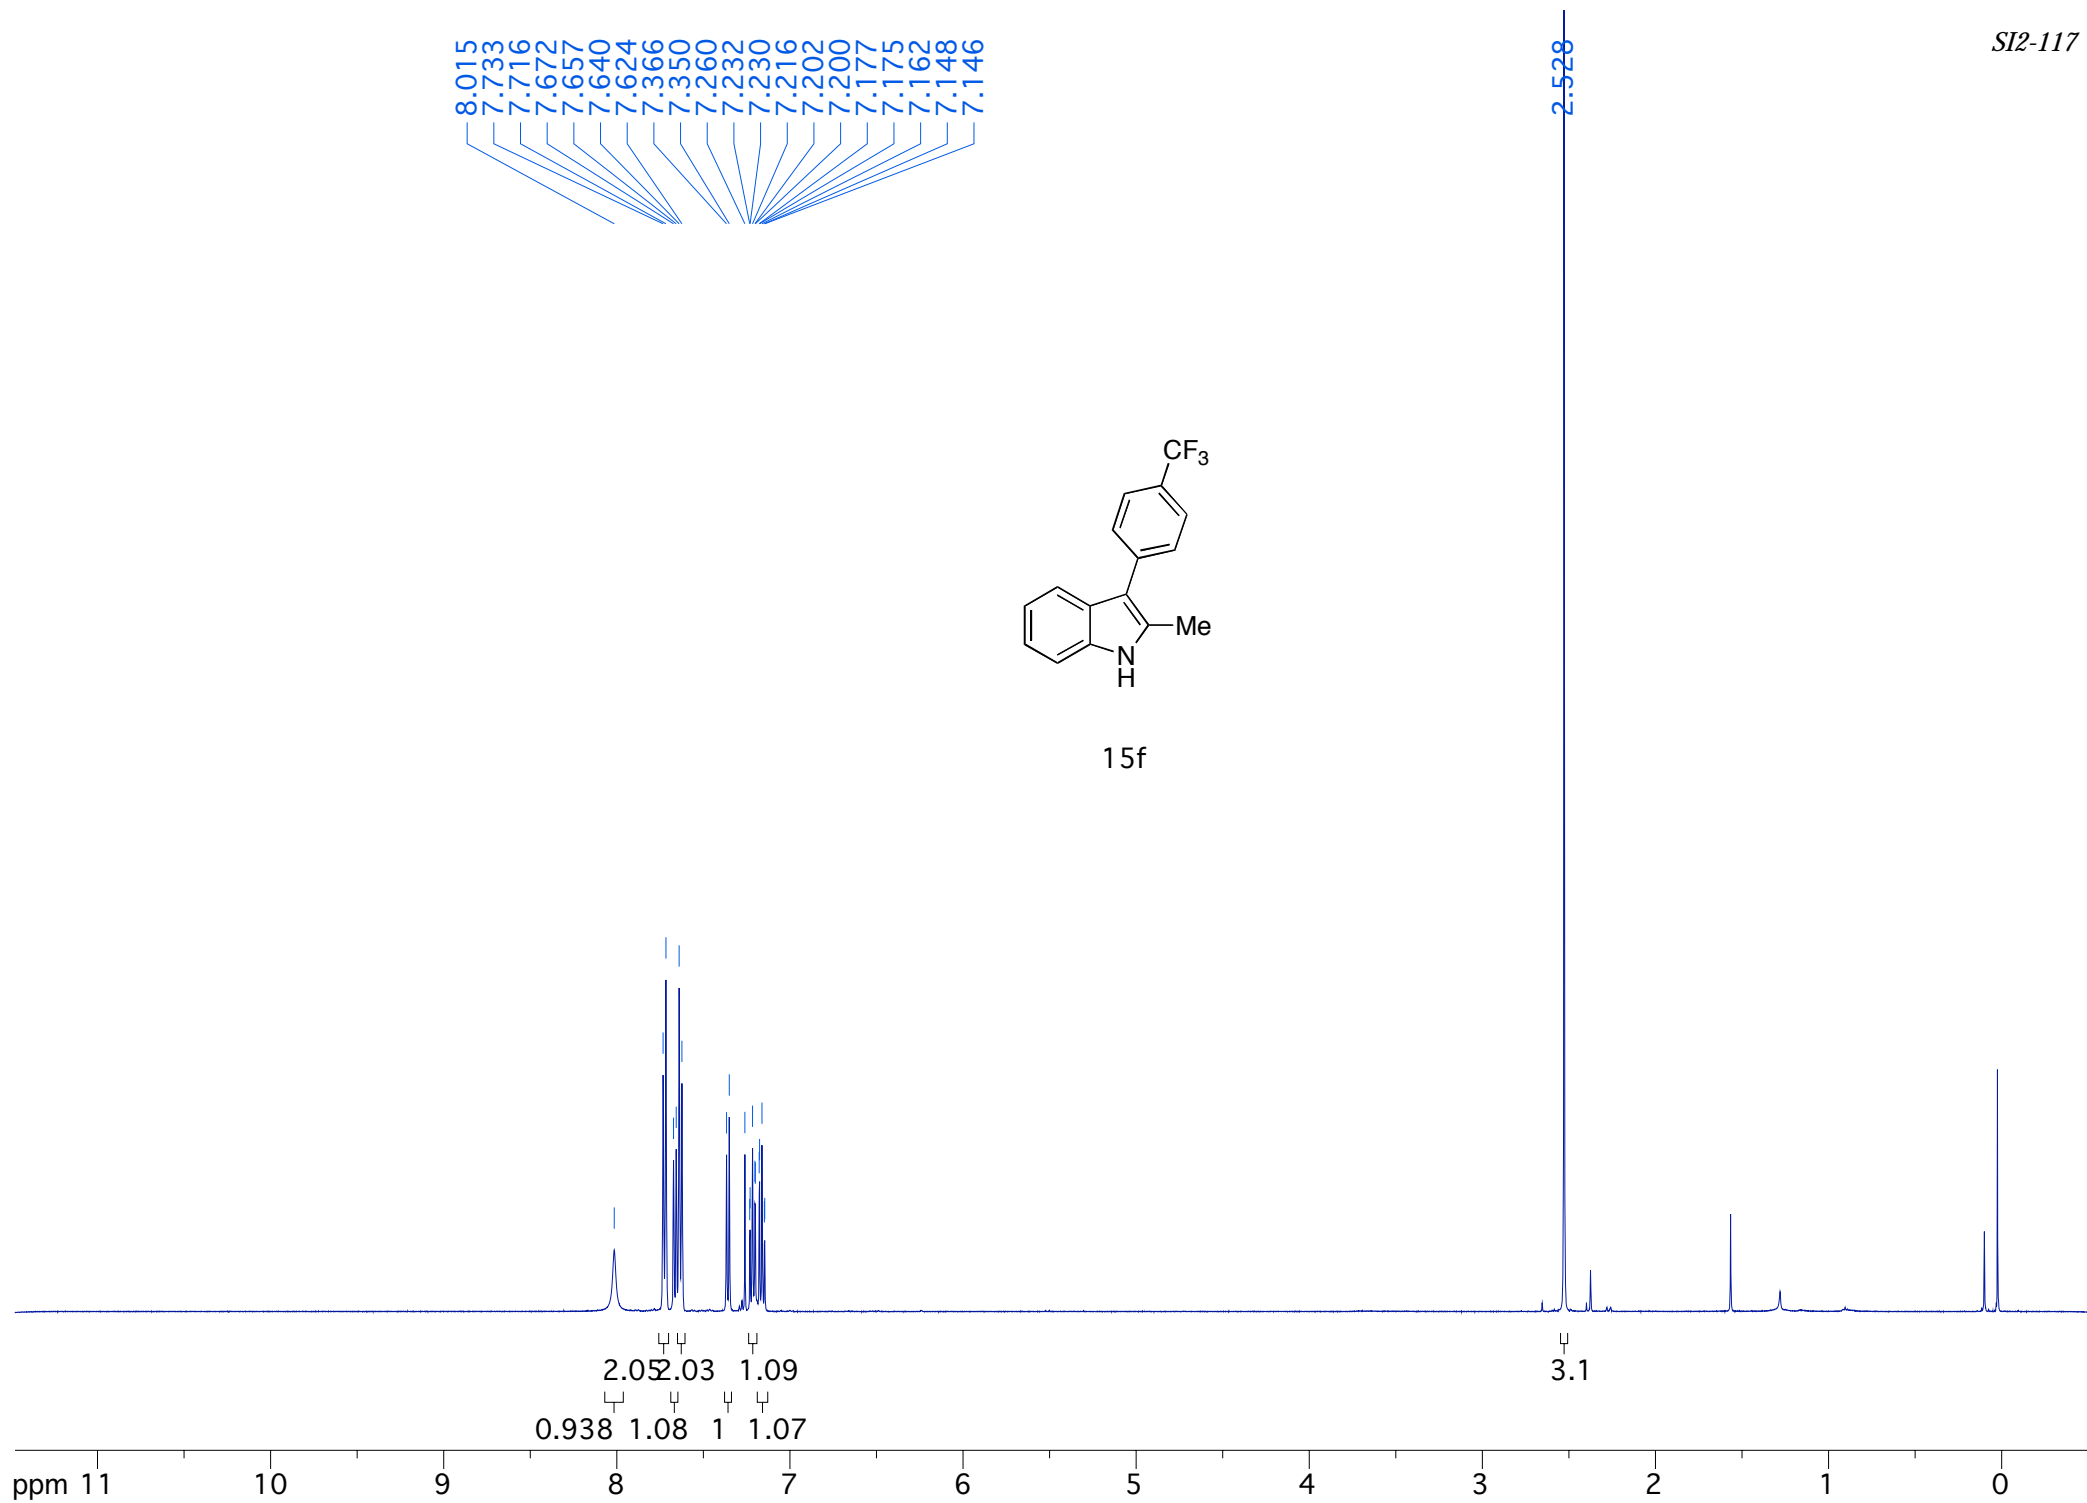

139.378  
135.259  
132.188  
129.400  
127.852  
127.590  
127.486  
125.623  
125.475  
125.447  
125.419  
123.464  
121.979  
120.437  
118.511  
113.415  
110.520

77.304  
77.053  
76.794

12.615

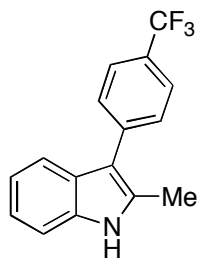

15f

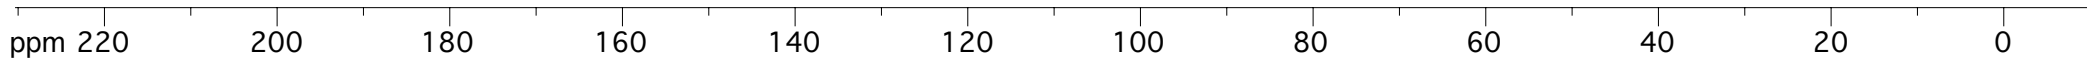

7.738  
7.488  
7.476  
7.470  
7.306  
7.304  
7.301  
7.299  
7.290  
7.288  
7.286  
7.139  
7.135  
7.128  
7.120  
7.117

2.885  
2.882  
2.880  
2.871  
2.869  
2.863  
2.858  
2.856  
2.585  
2.583  
2.571  
2.556

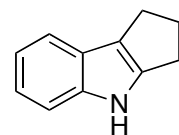

18a

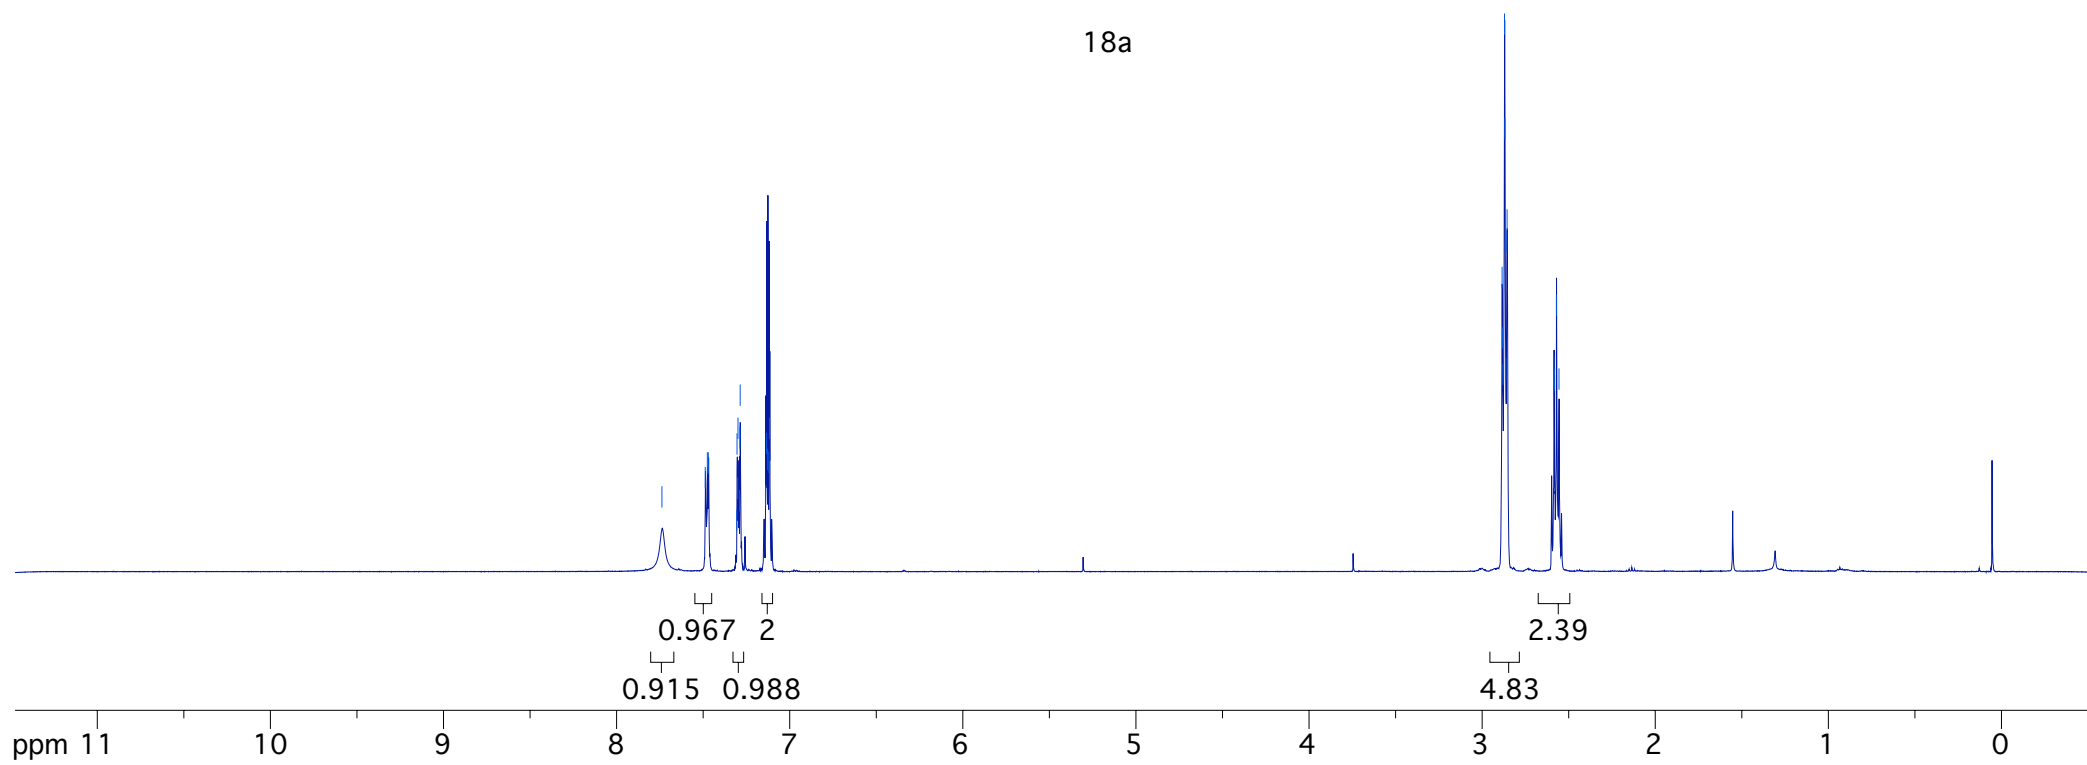

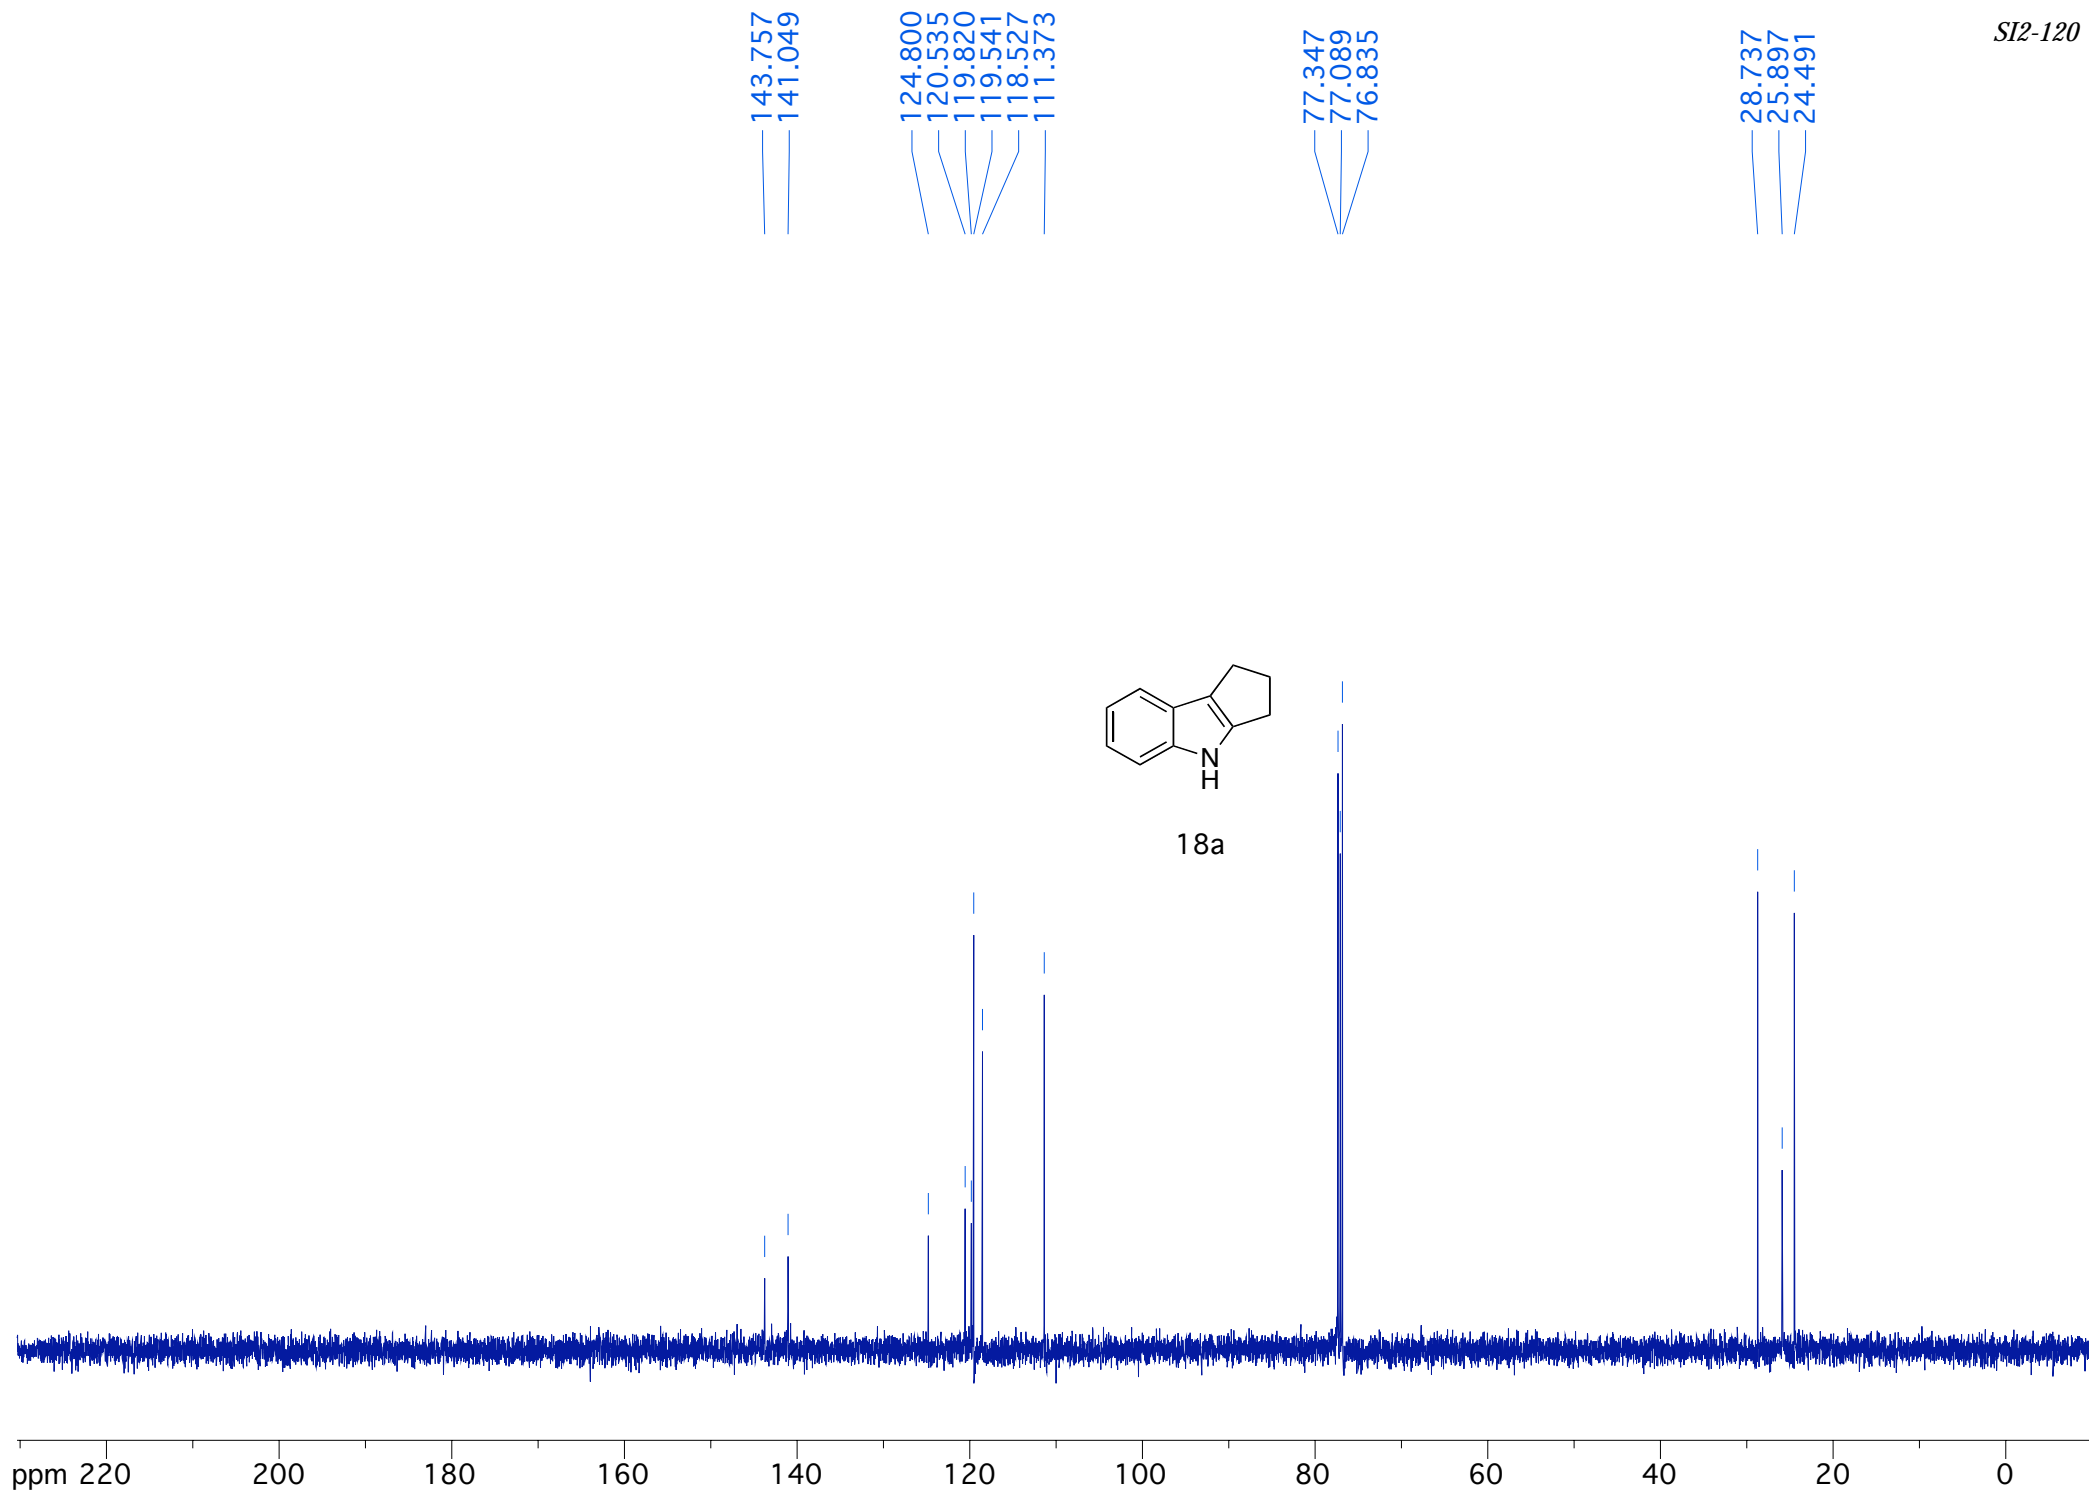



7.638  
7.491  
7.476  
7.284  
7.269  
7.260  
7.149  
7.135  
7.121  
7.119  
7.110  
7.095  
7.081

2.746  
2.734  
2.722  
1.962  
1.942  
1.938  
1.933  
1.927  
1.916  
1.904  
1.900  
1.894  
1.891  
1.888  
1.882  
1.871

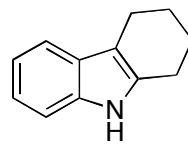

18b

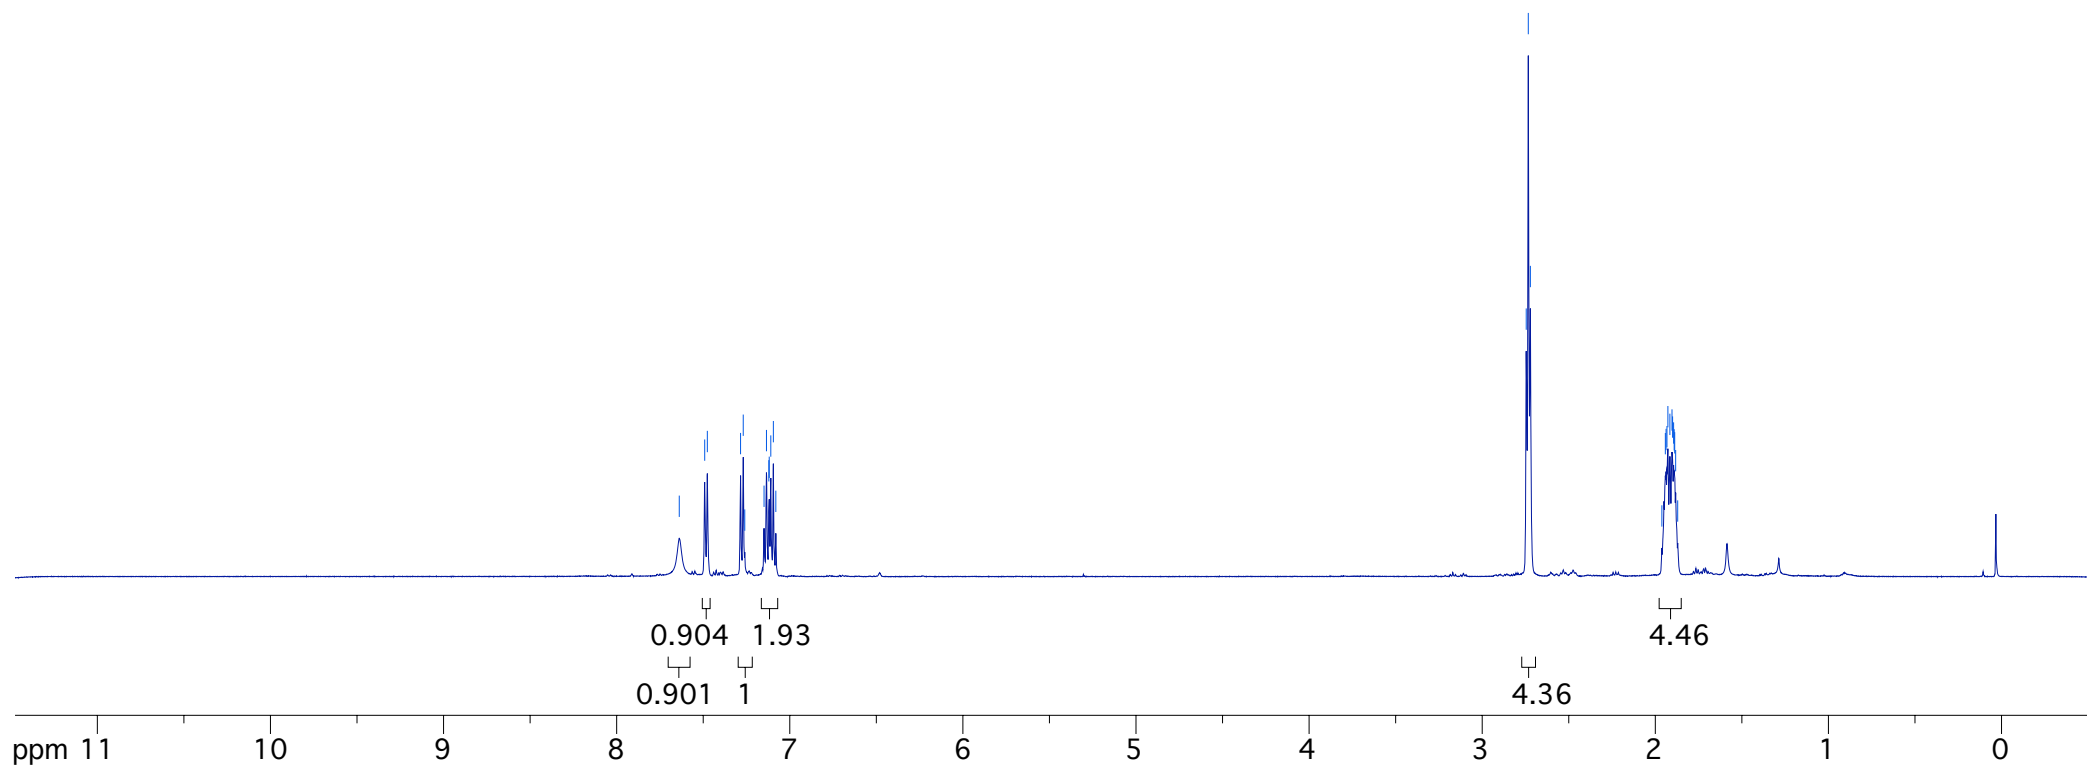

135.664  
134.113  
127.853  
120.995  
119.114  
117.748  
110.368  
110.195

77.320  
77.069  
76.815

23.344  
23.261  
20.955

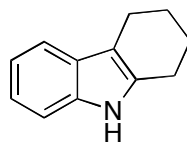

18b

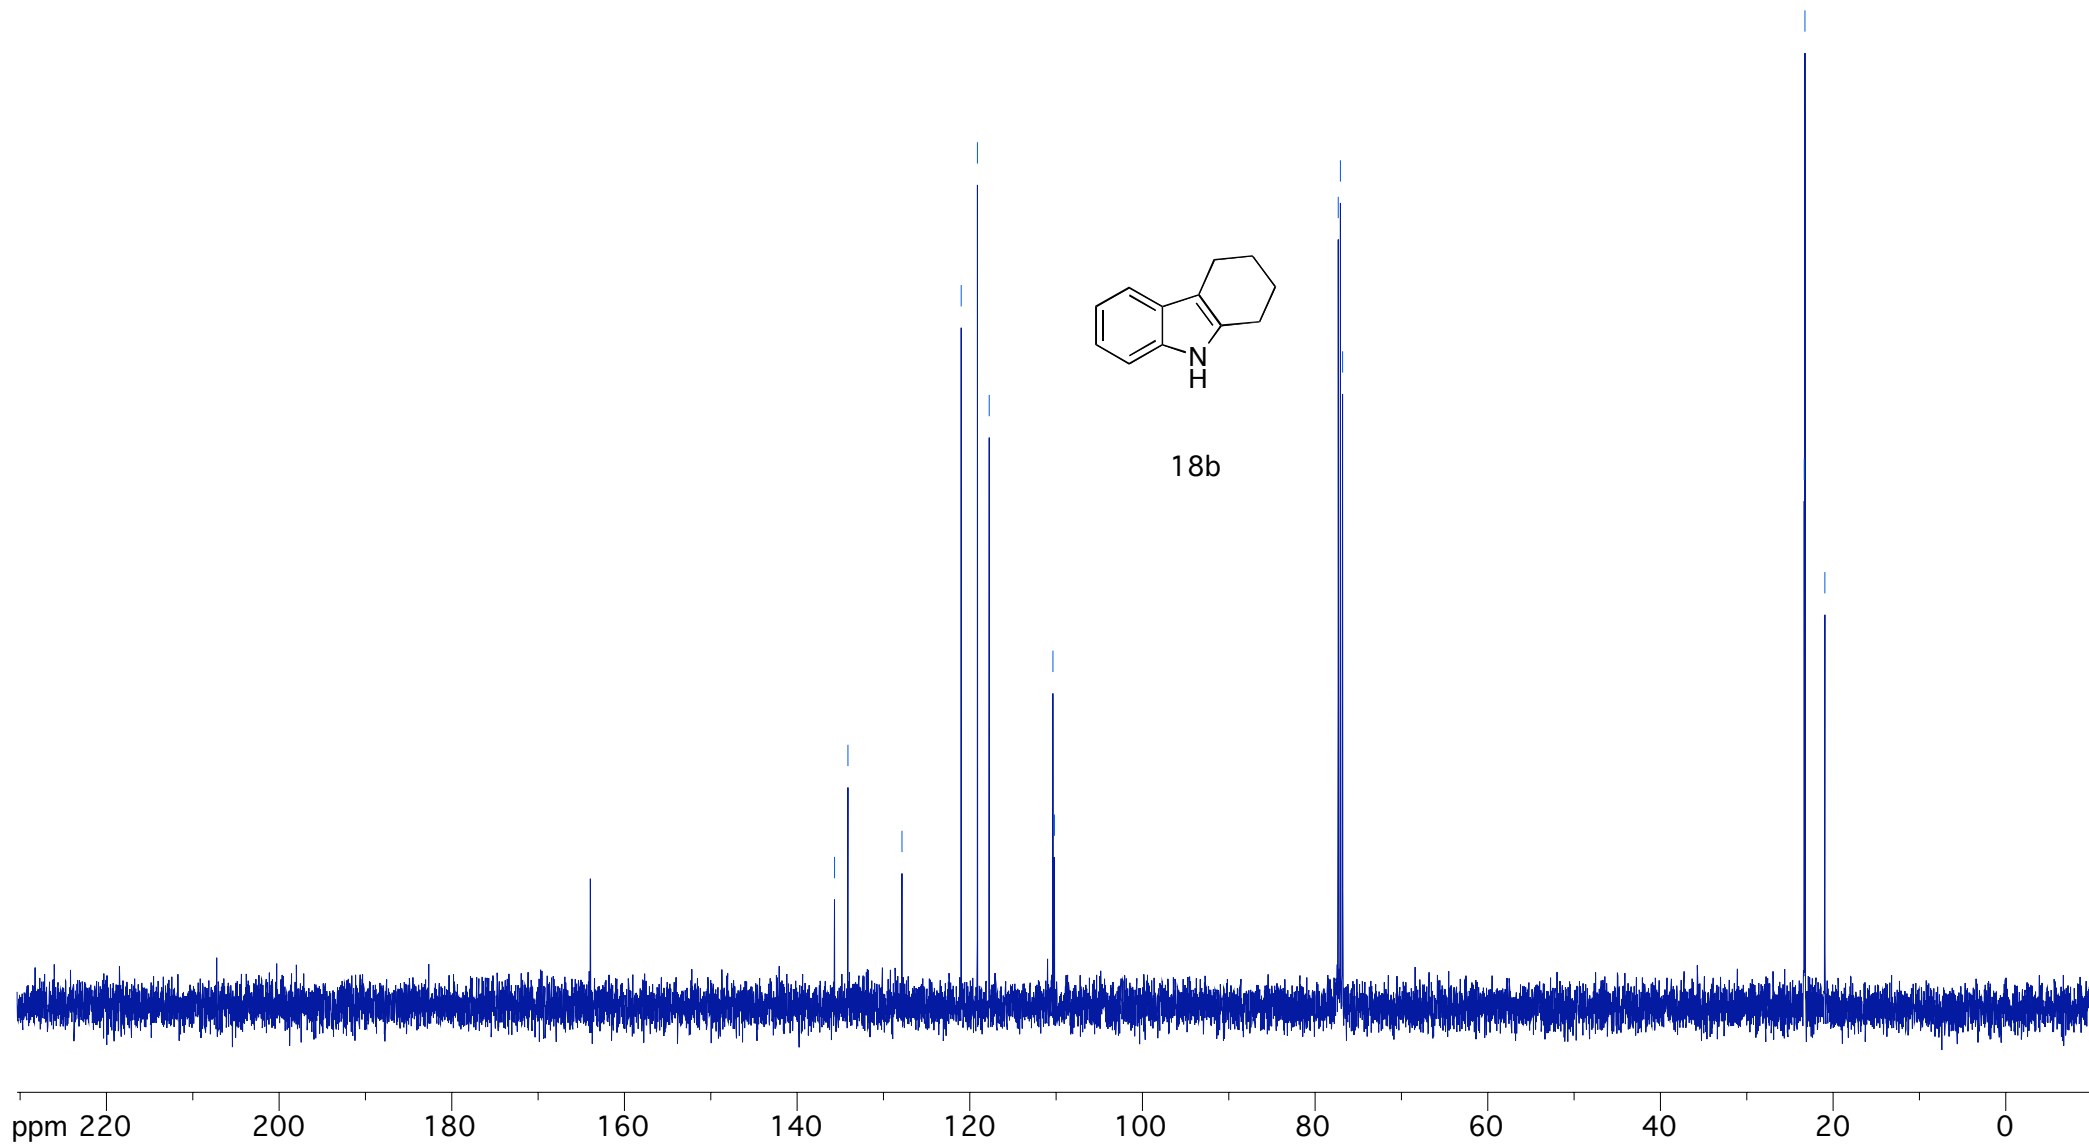

7.613  
7.527  
7.515  
7.514  
7.510  
7.273  
7.270  
7.268  
7.264  
7.259  
7.257  
7.150  
7.136  
7.129  
7.121  
7.118  
7.107

2.867  
2.855  
2.845  
2.834  
2.823  
1.936  
1.931  
1.926  
1.918  
1.914  
1.833  
1.823  
1.813

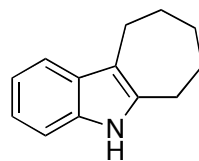

18c

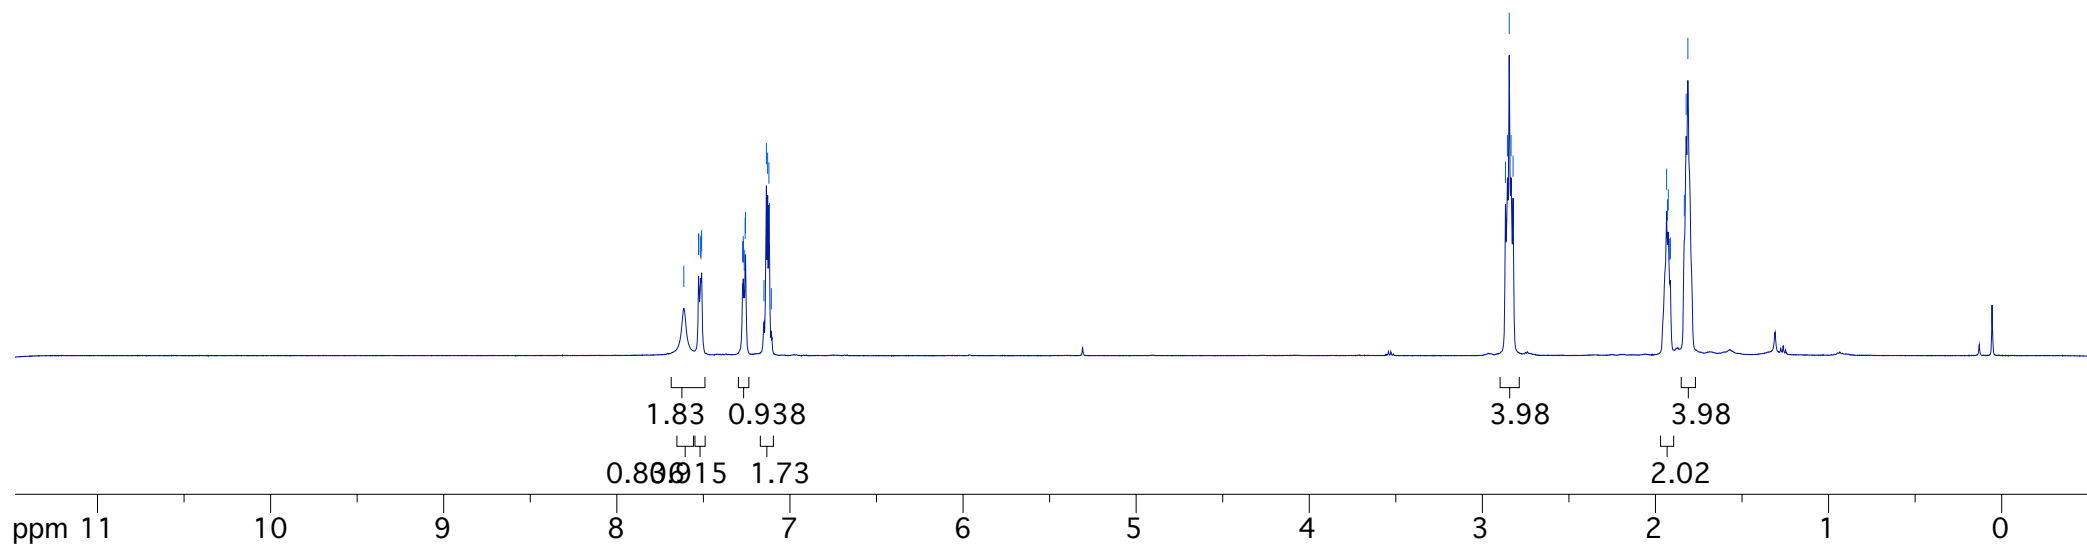

137.478  
134.275  
129.310  
120.643  
119.056  
117.690  
113.753  
110.256

77.349  
77.098  
76.845

31.866  
29.604  
28.794  
27.591  
24.727

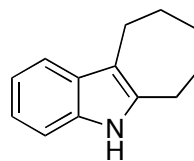

18c

ppm 220 200 180 160 140 120 100 80 60 40 20 0

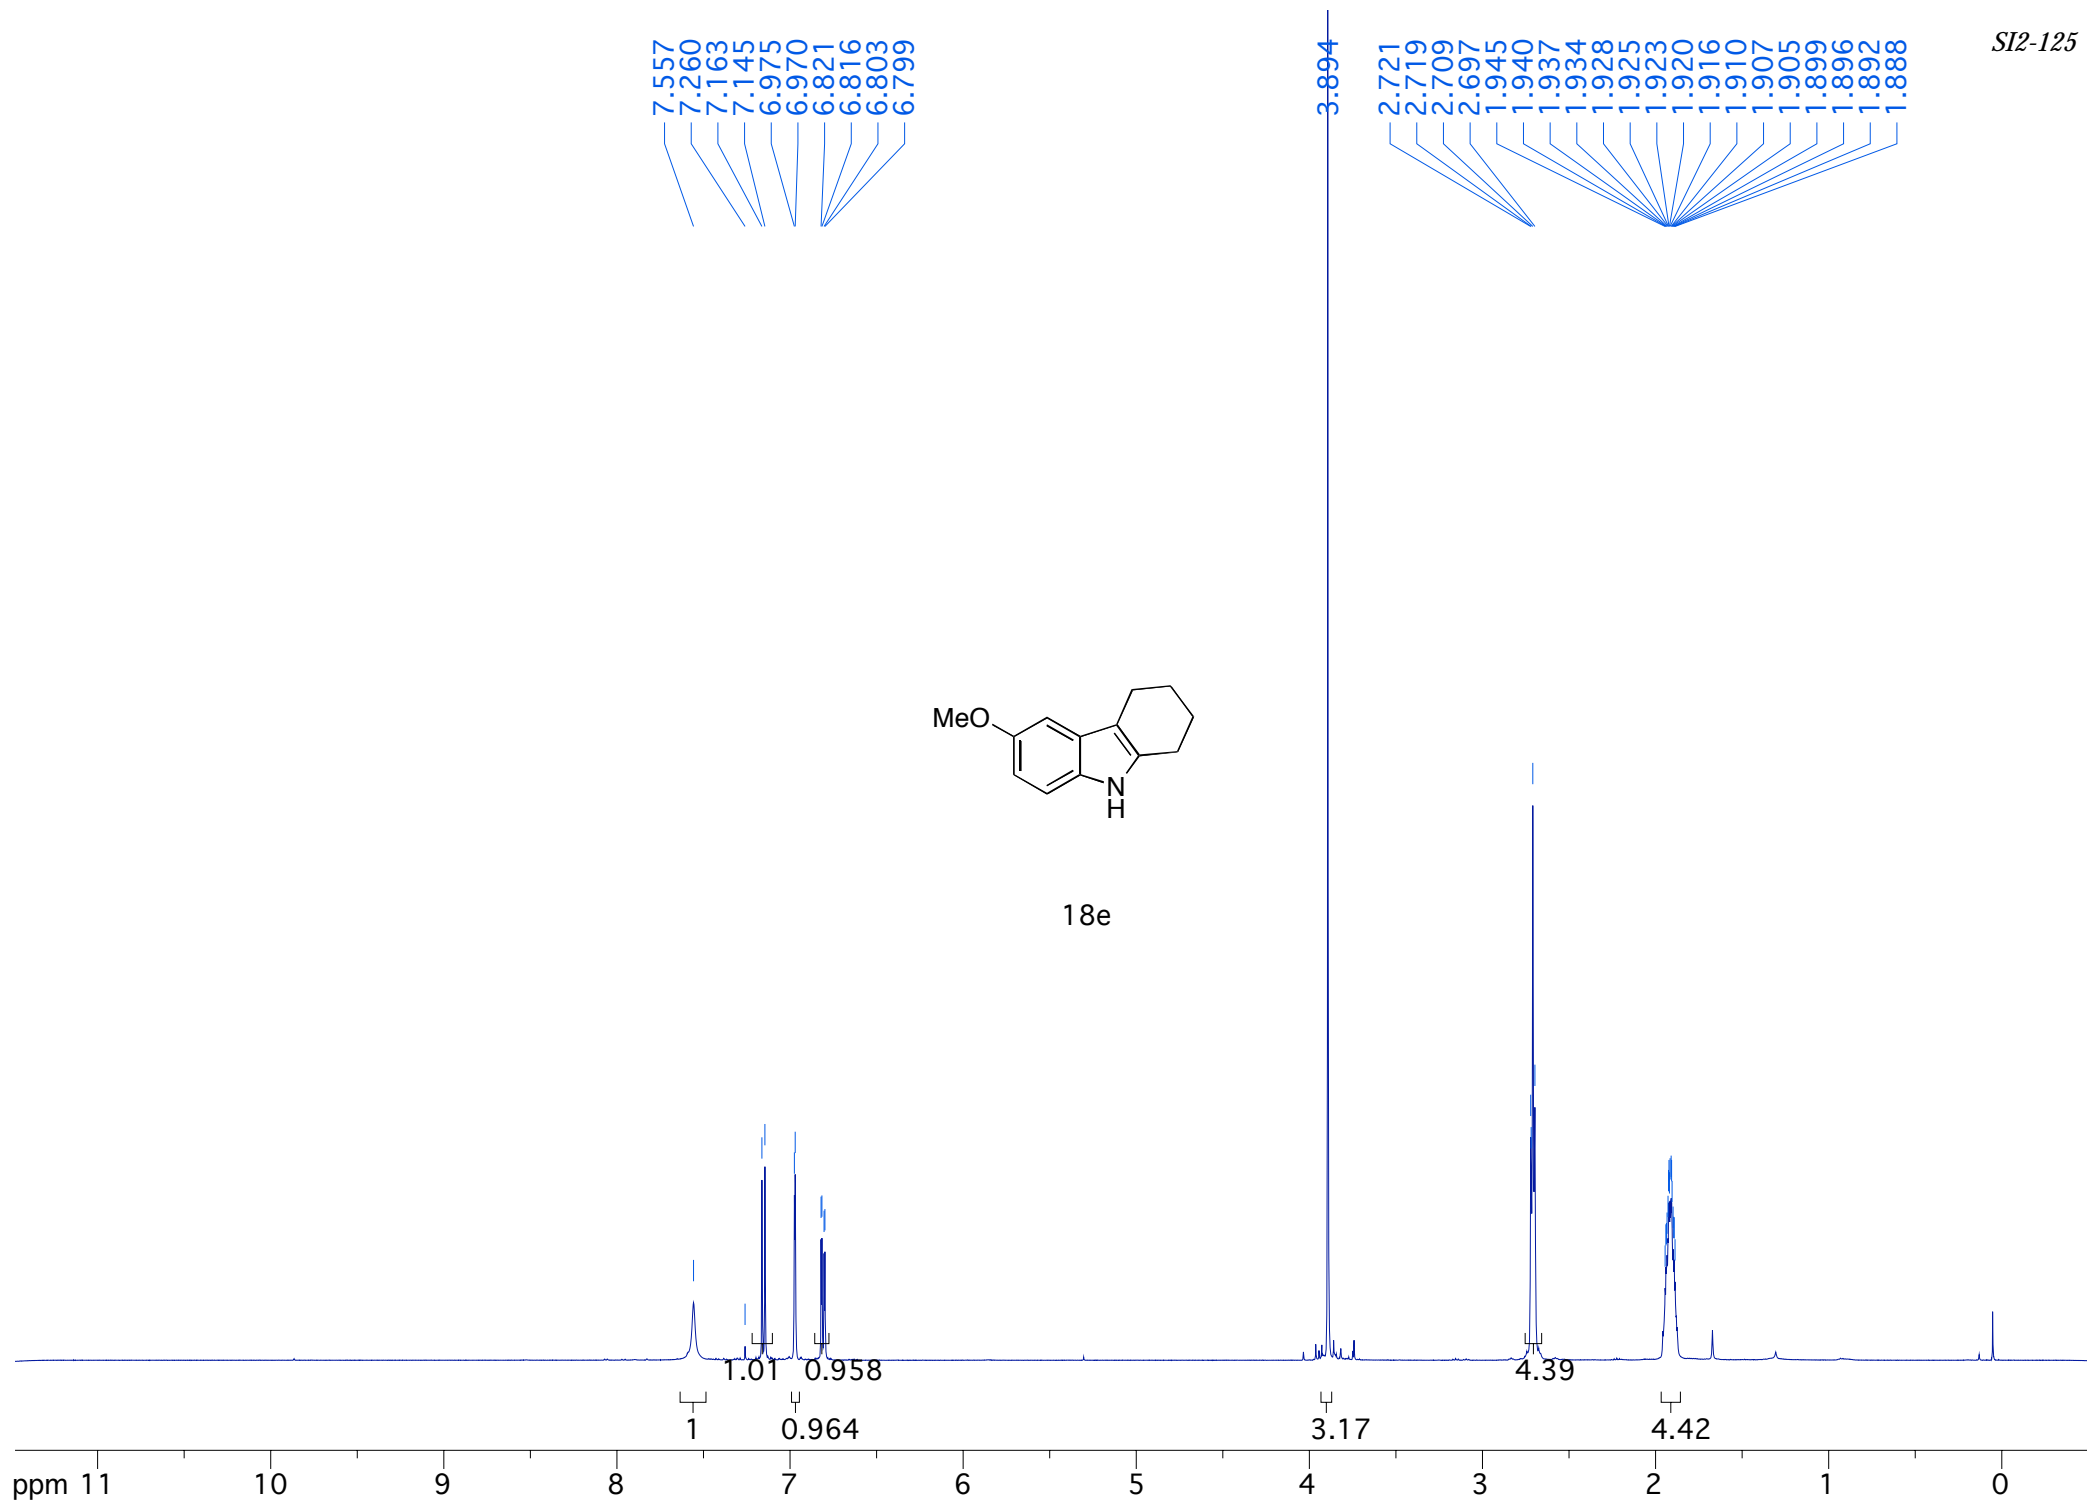

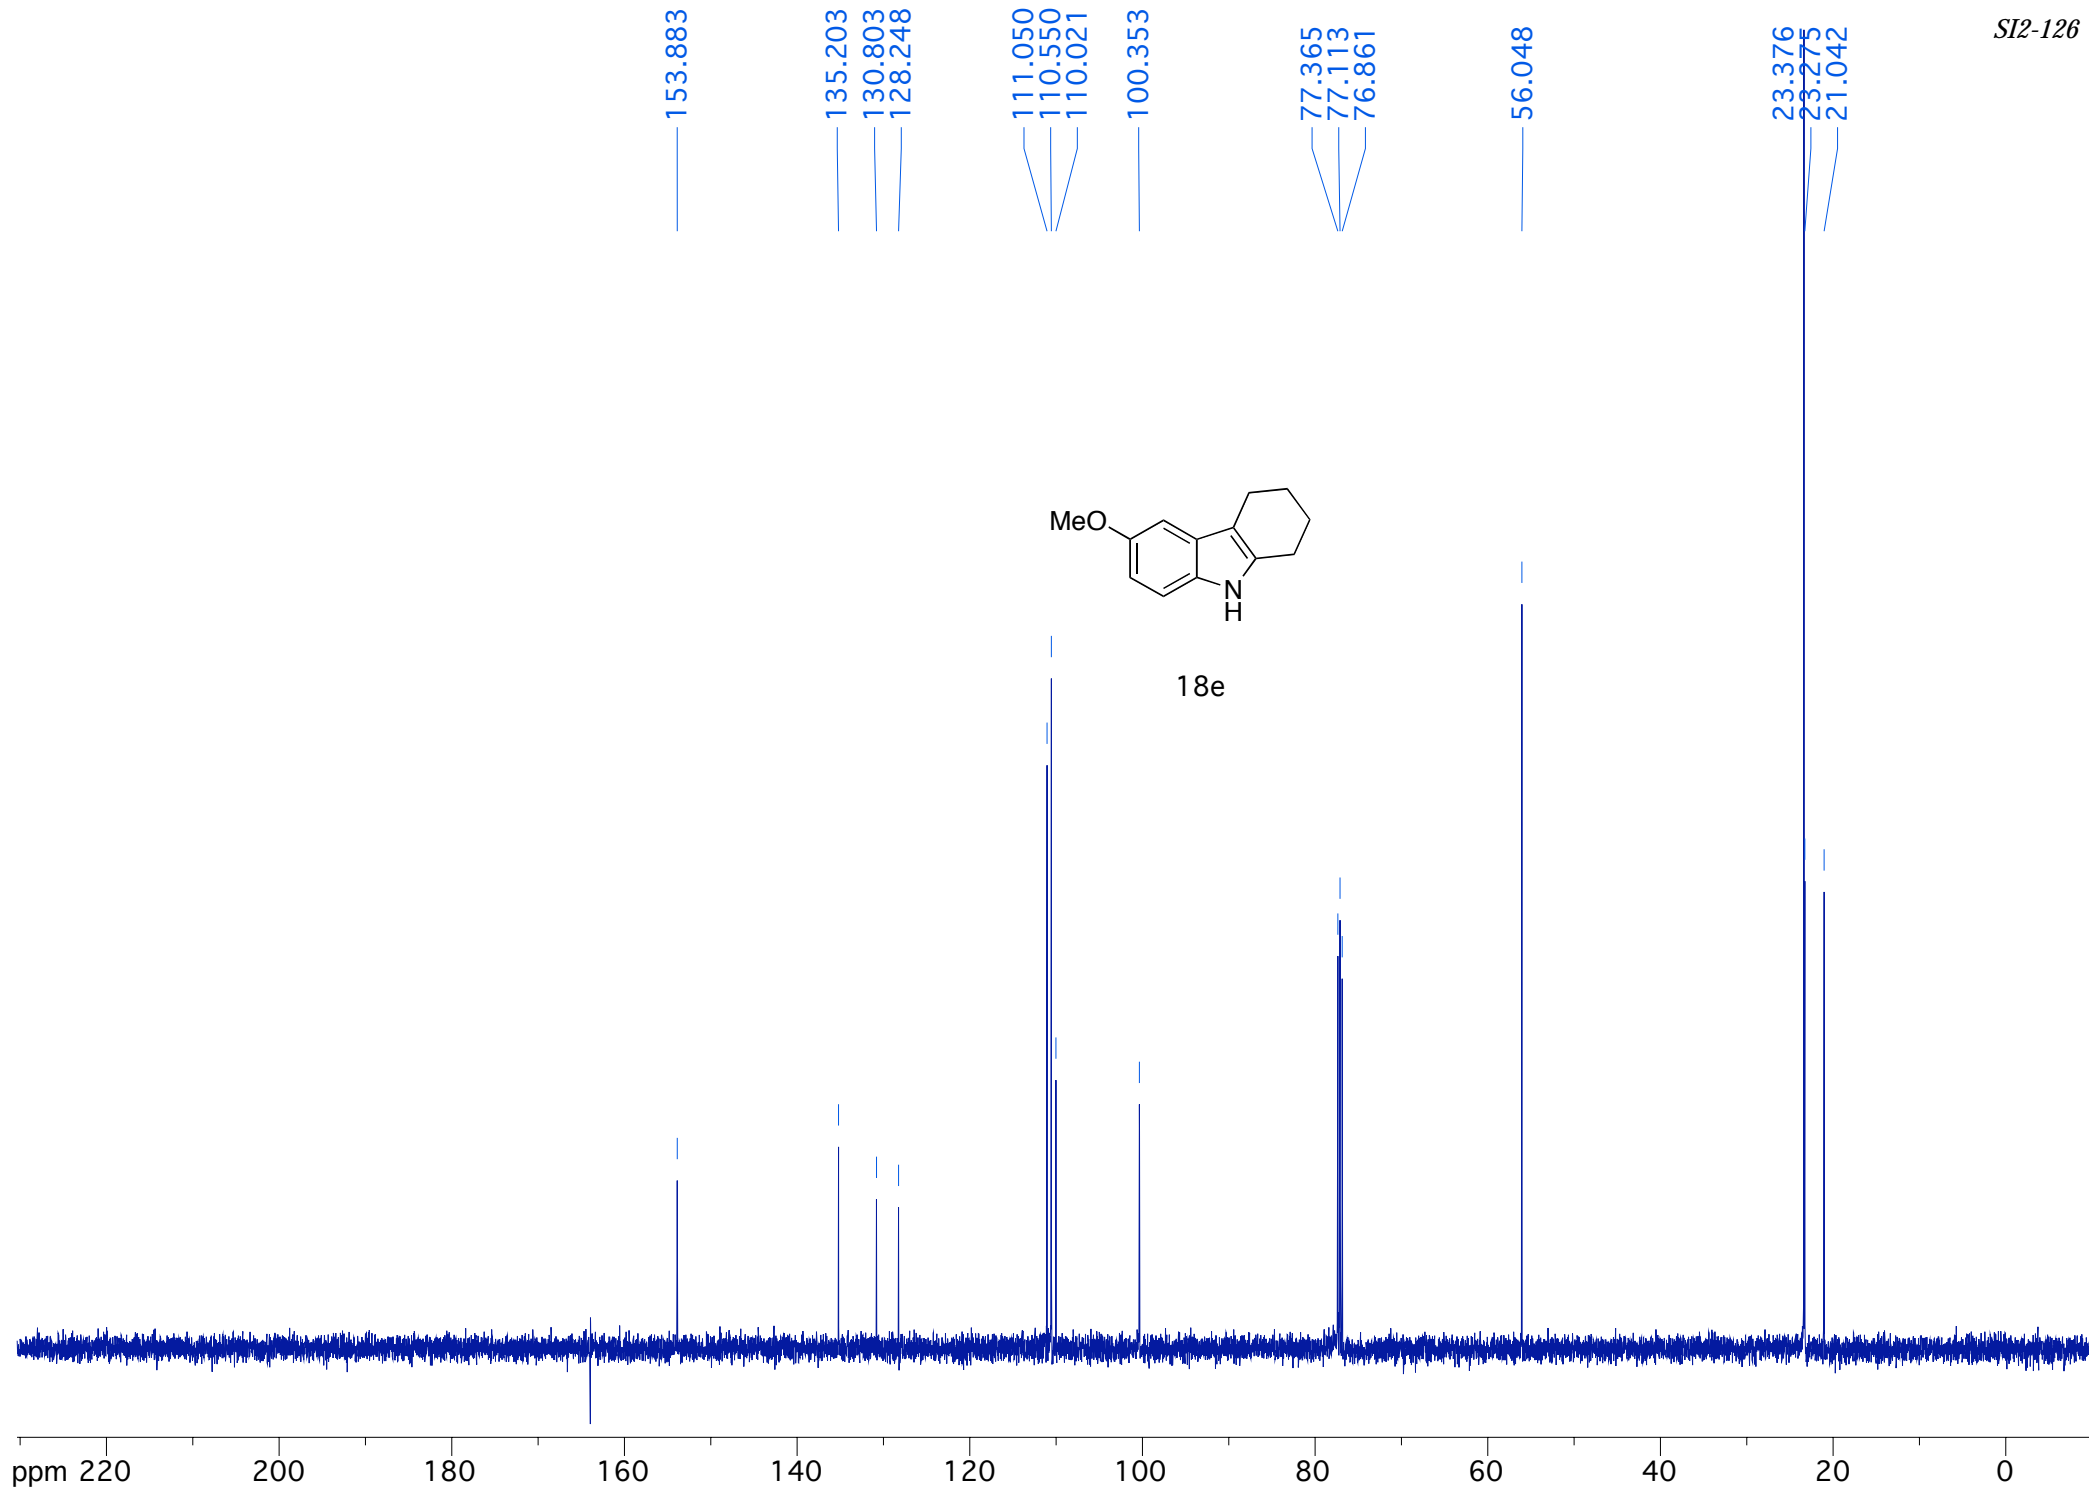

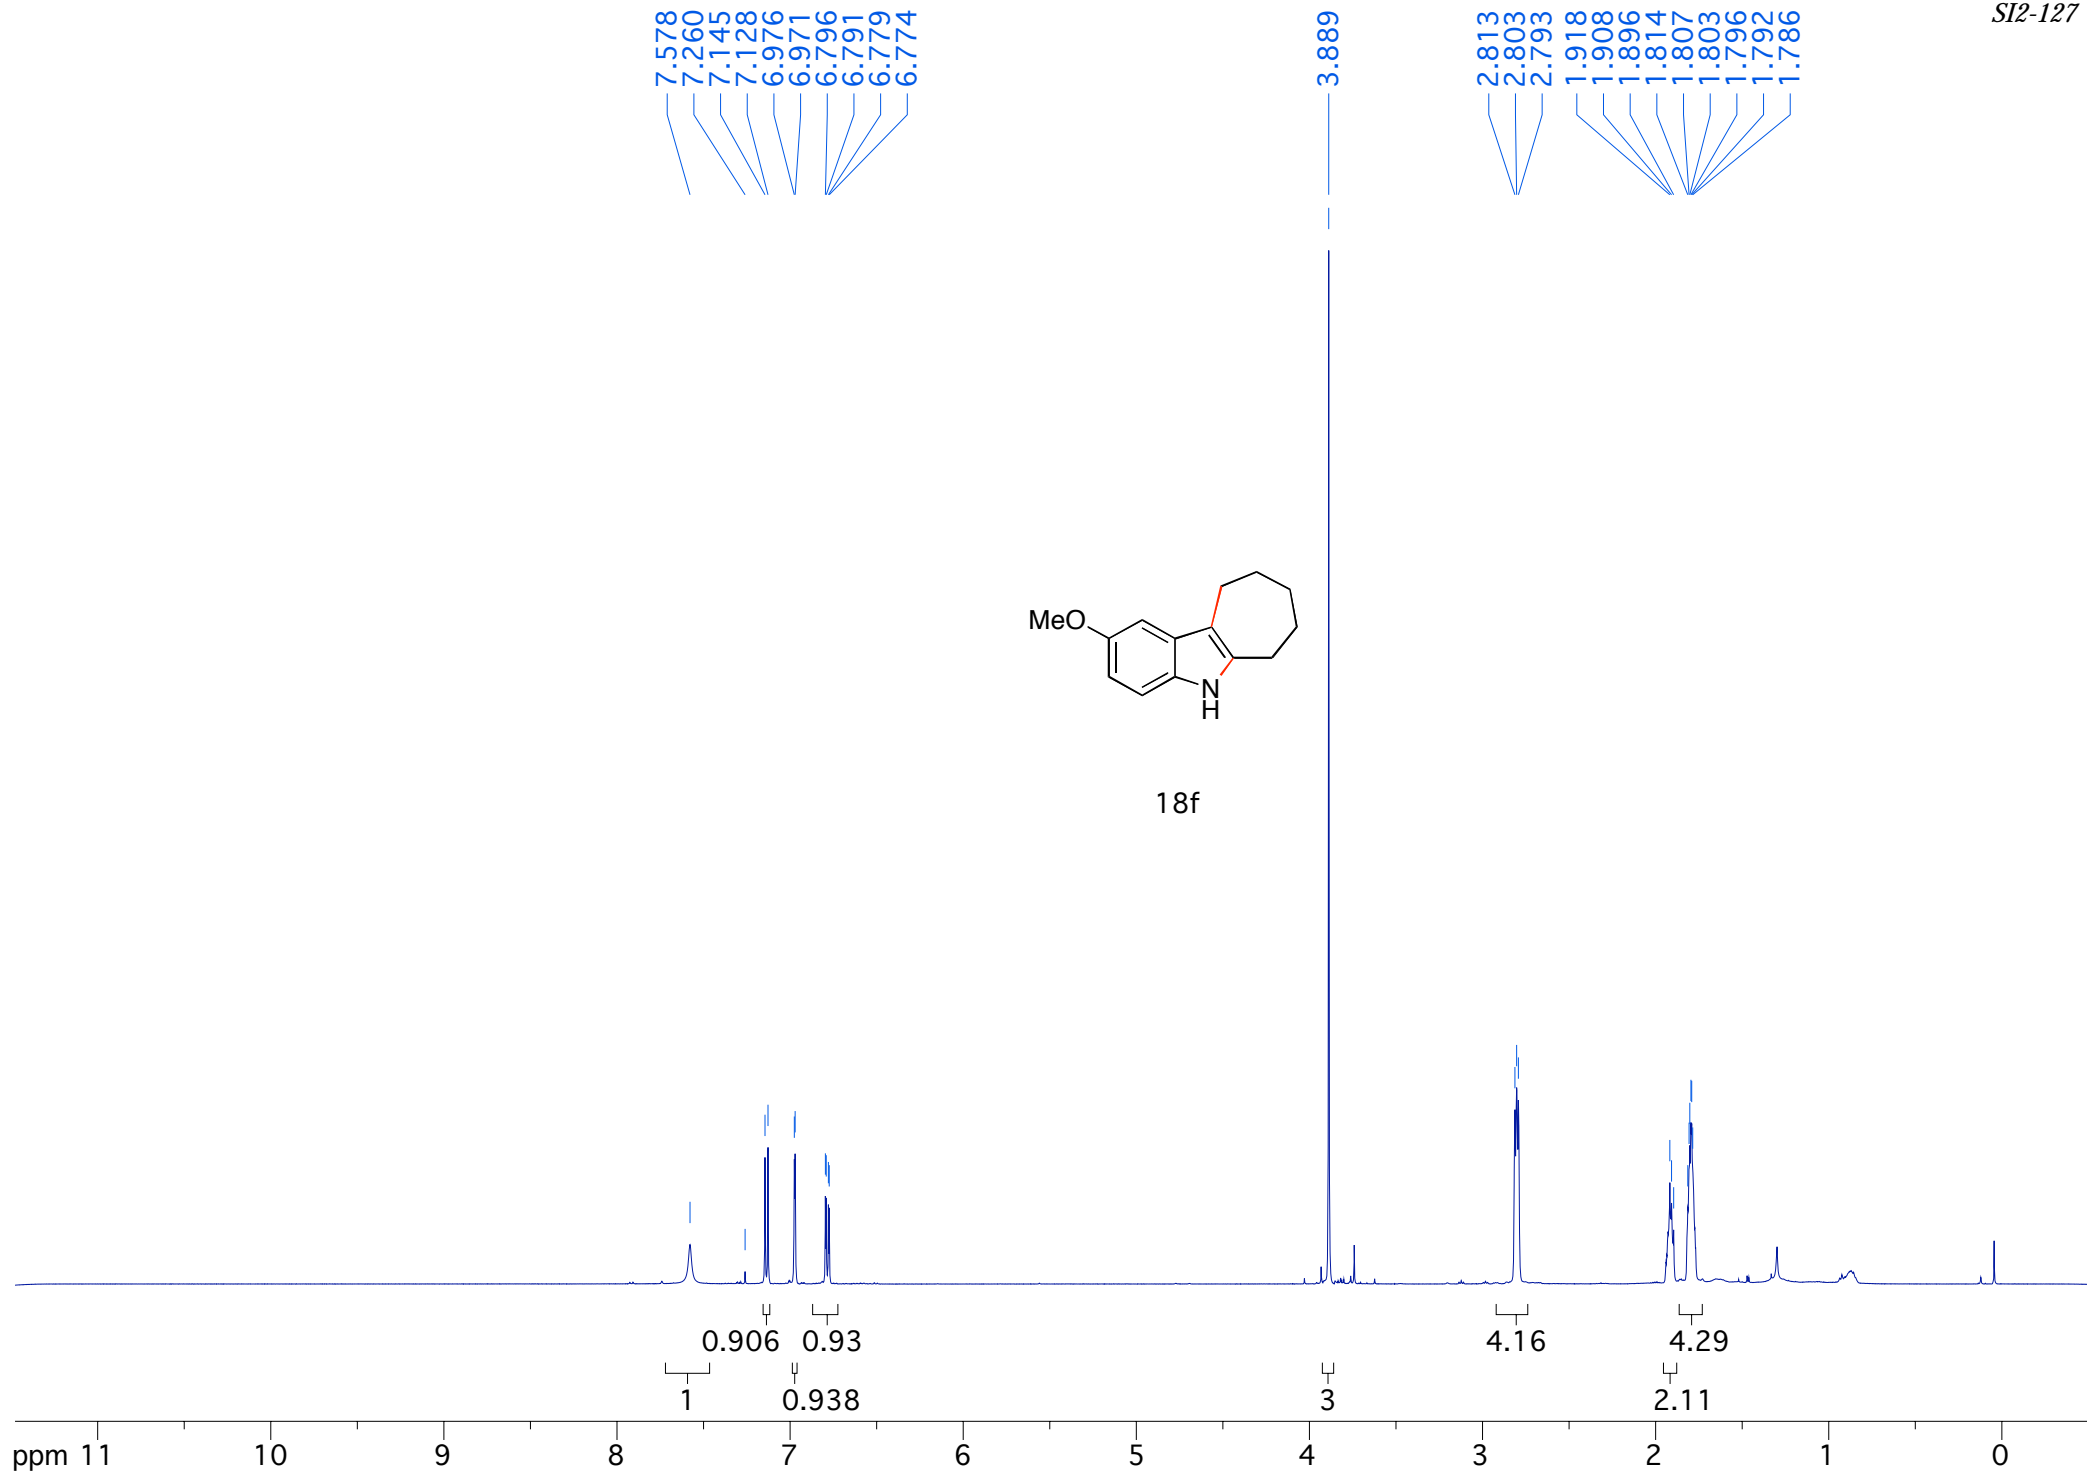

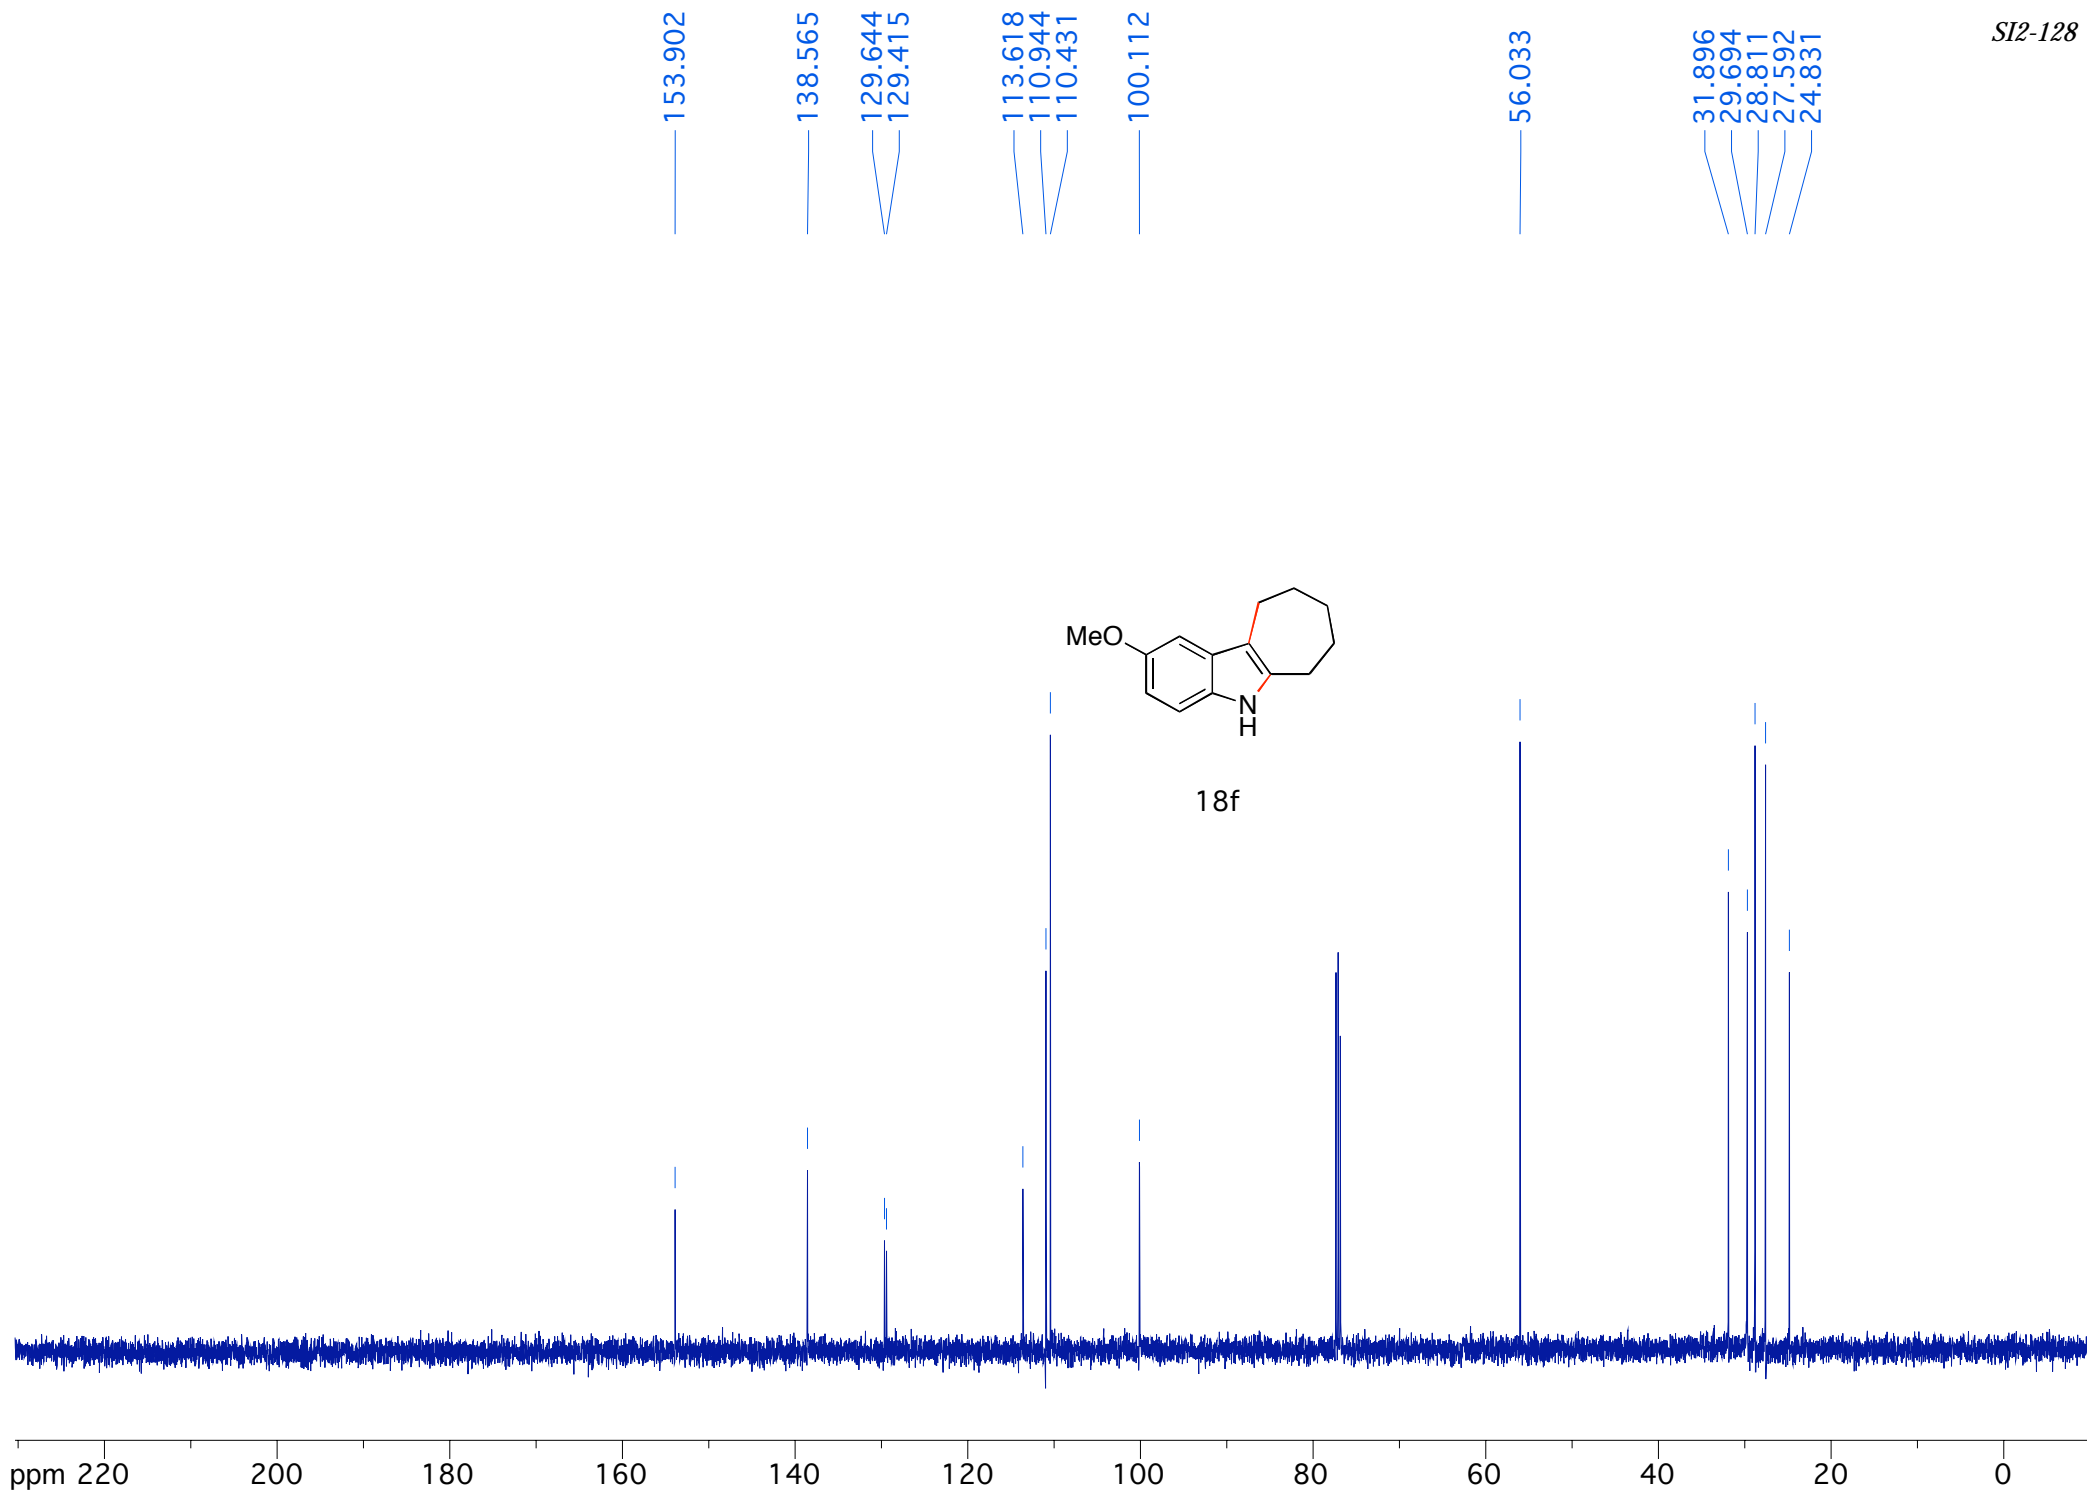



7.891  
7.763  
7.338  
7.335  
7.321  
7.318  
7.305  
7.288  
7.260

2.863  
2.852  
2.841  
2.831  
2.819  
1.939  
1.935  
1.928  
1.918  
1.913  
1.907  
1.900  
1.895  
1.820  
1.808  
1.805  
1.797  
1.794  
1.788  
1.782  
1.774  
1.759

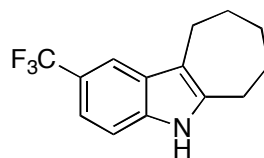

18g

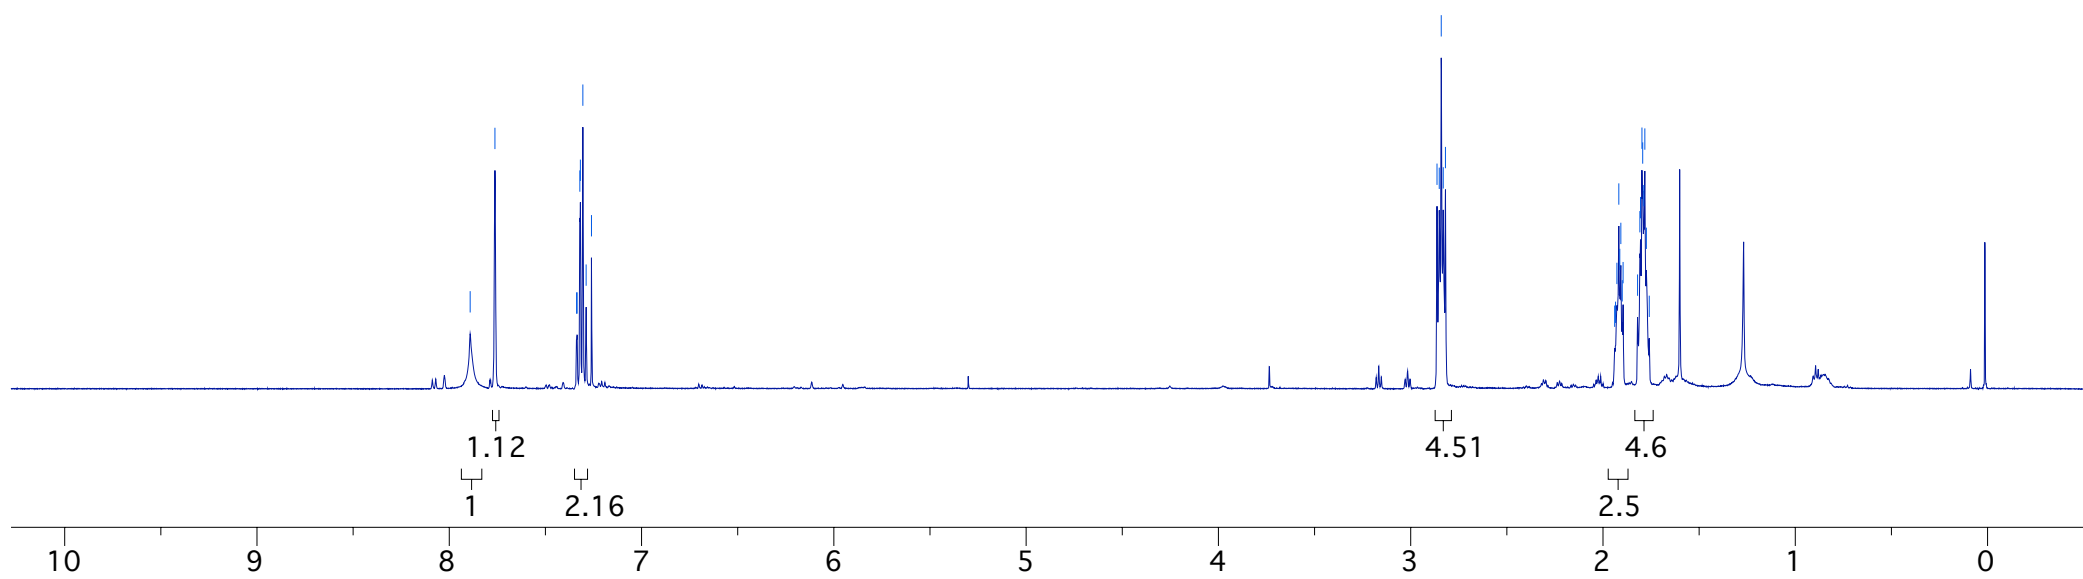

139.284  
135.592  
128.867  
128.677  
126.709  
124.548  
121.817  
121.567  
121.318  
121.066  
117.380  
117.351  
115.382  
115.354  
114.719  
110.240

77.290  
77.039  
76.783

31.647  
29.565  
28.547  
27.357  
24.565

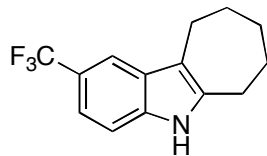

18g

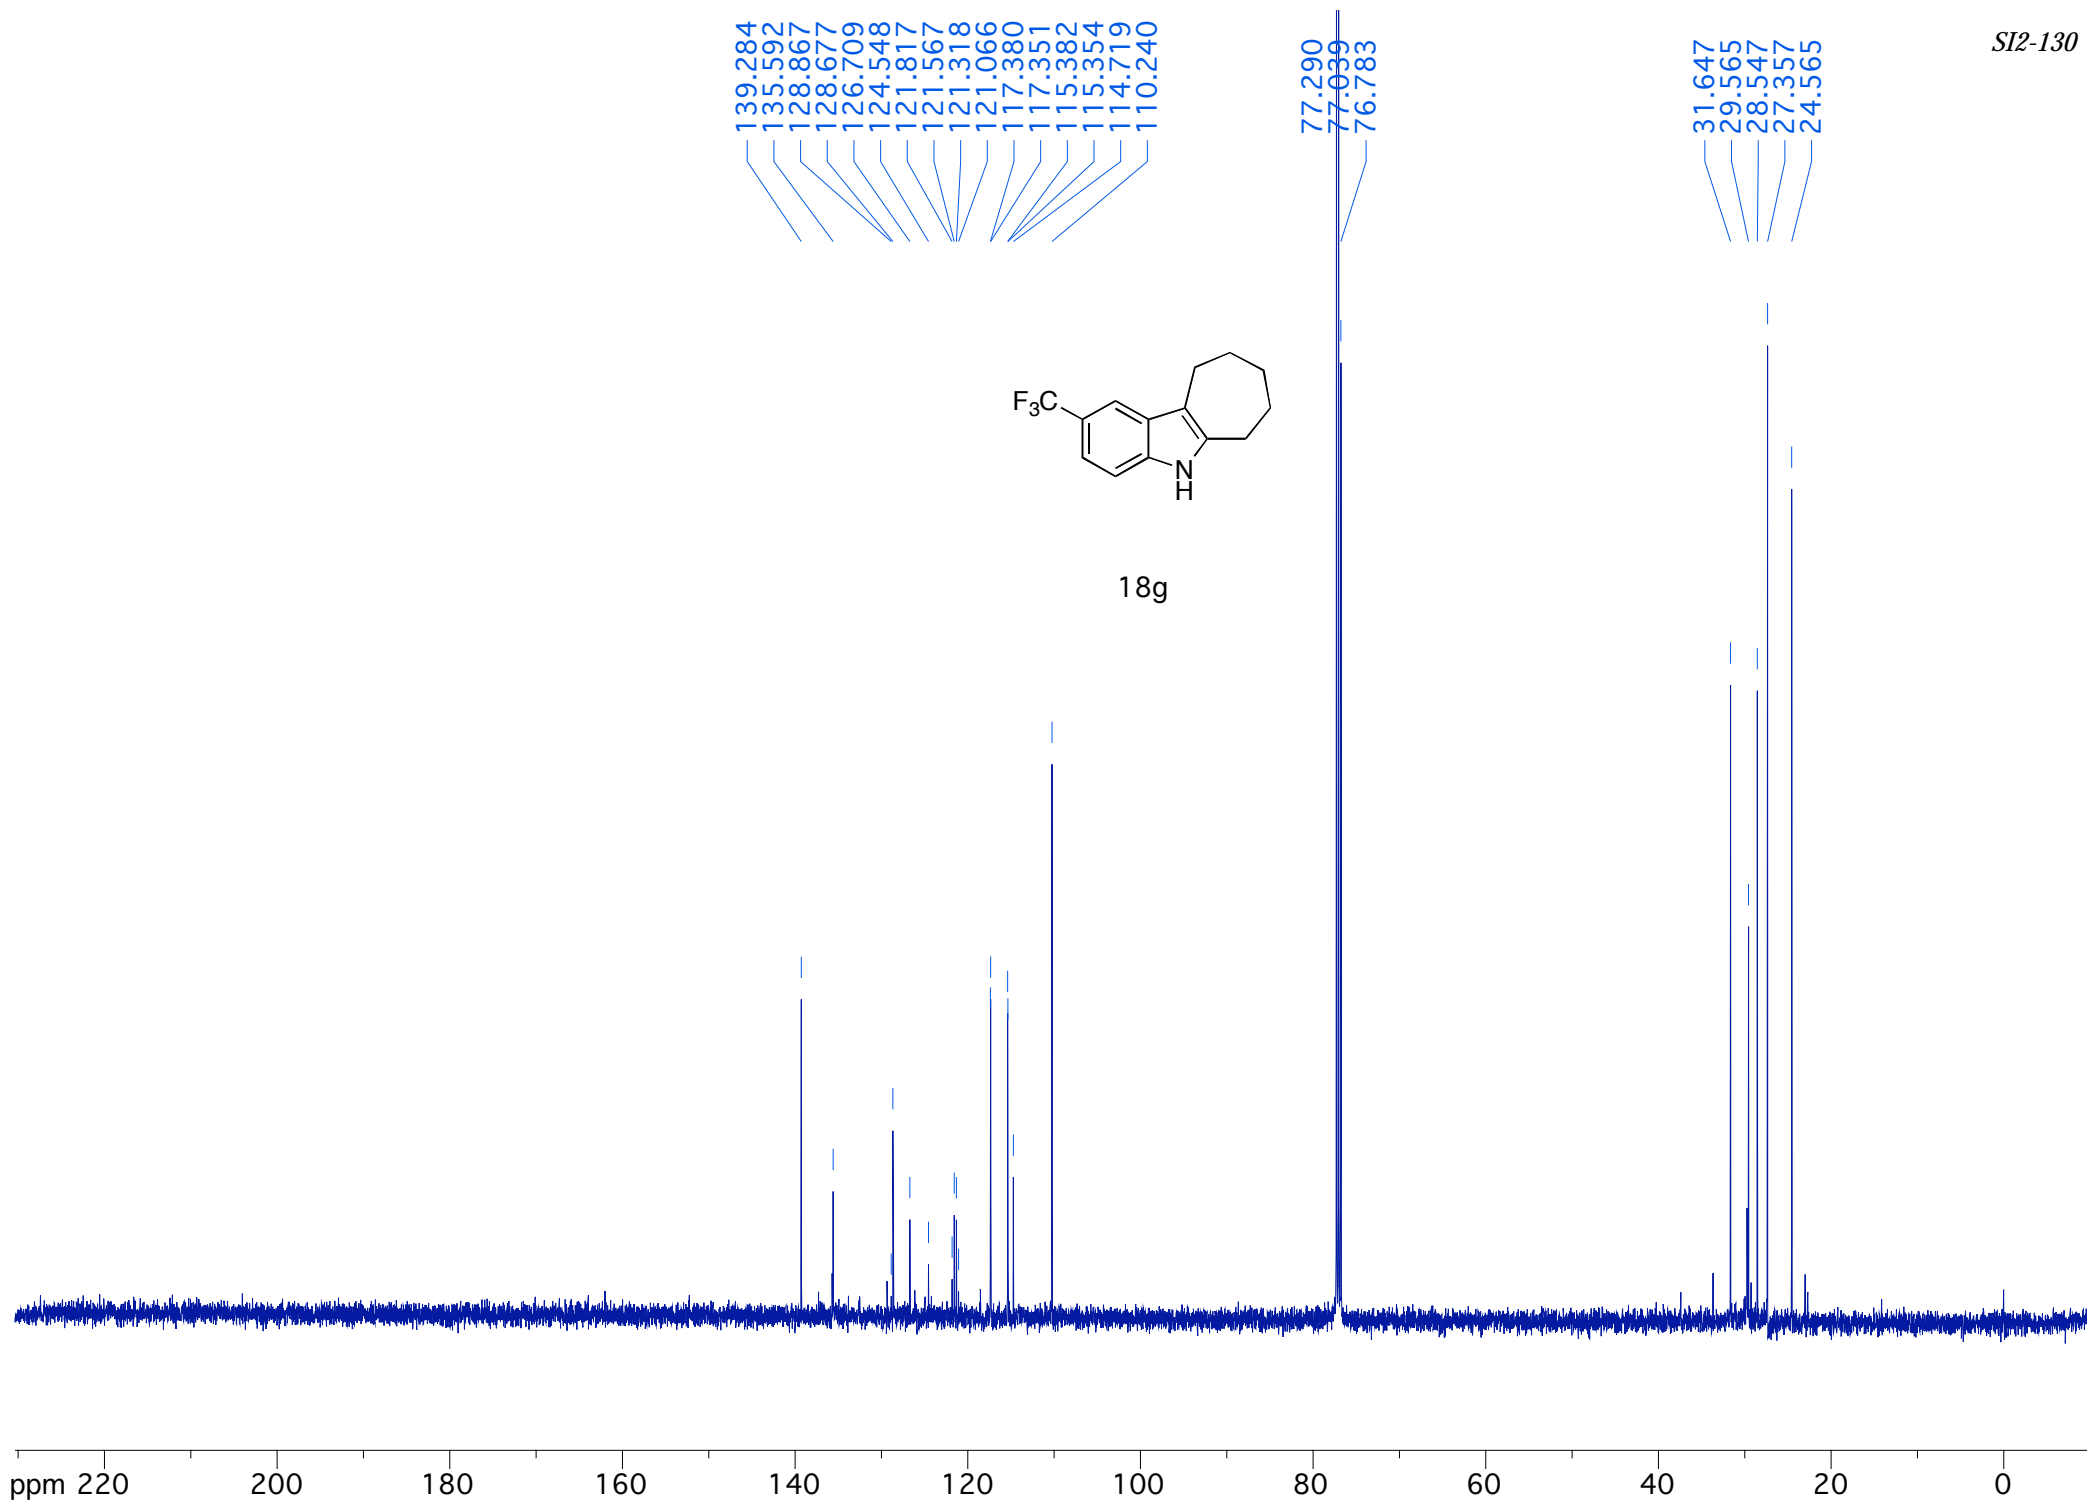

7.845  
7.501  
7.486  
7.289  
7.274  
7.260  
7.181  
7.170  
7.167  
7.154  
7.151  
7.139  
7.137  
7.125

4.021  
4.009  
4.000  
3.991  
3.980  
3.971

3.031  
3.022  
3.012  
3.003

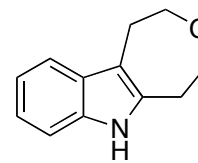

18h

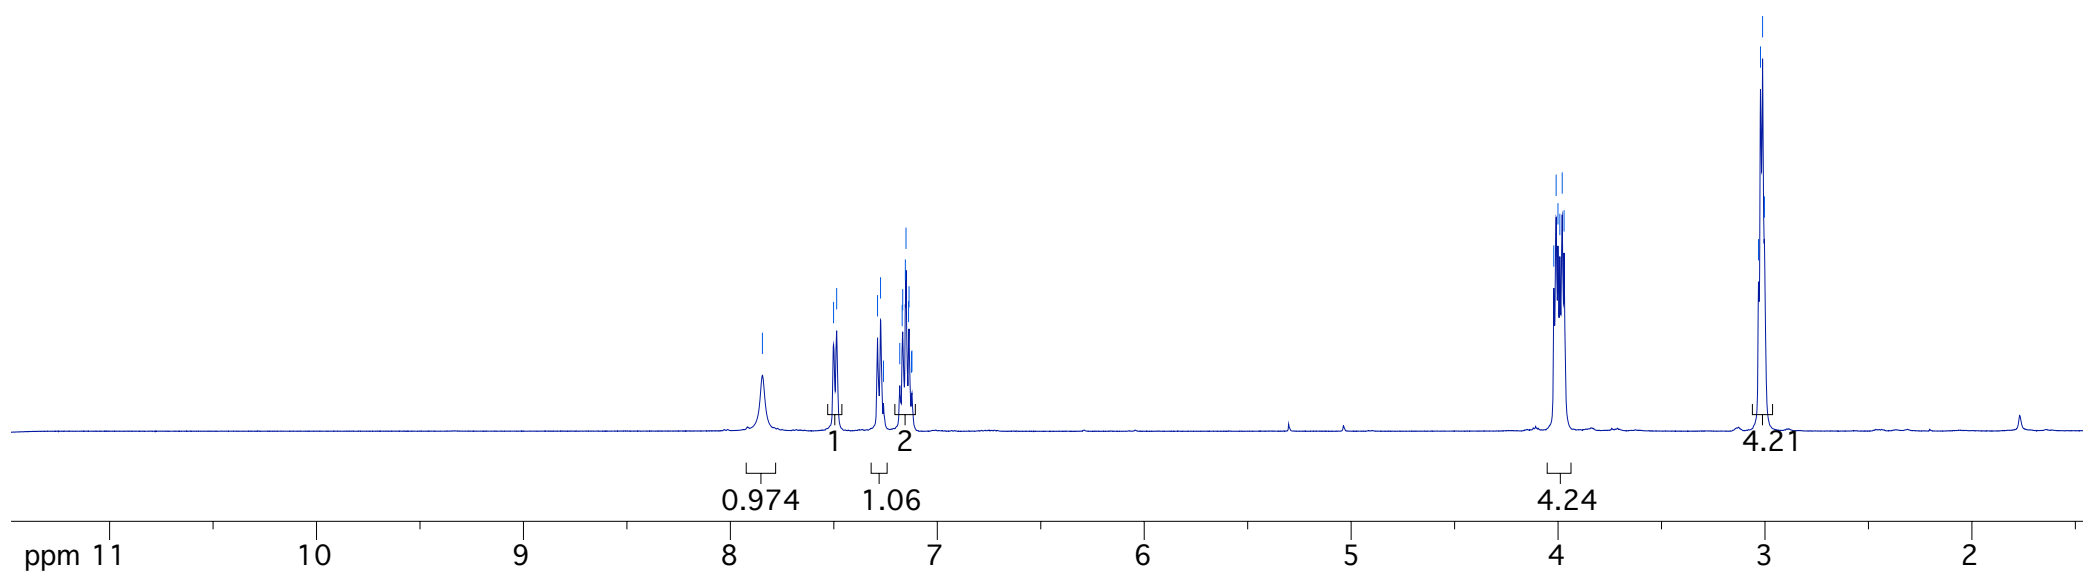

135.494  
134.760  
128.942  
121.243  
119.380  
117.789  
112.371  
110.433  
77.366  
77.114  
76.861  
73.052  
70.679  
32.210  
27.606

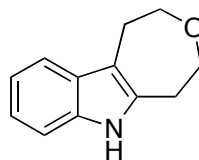

18h

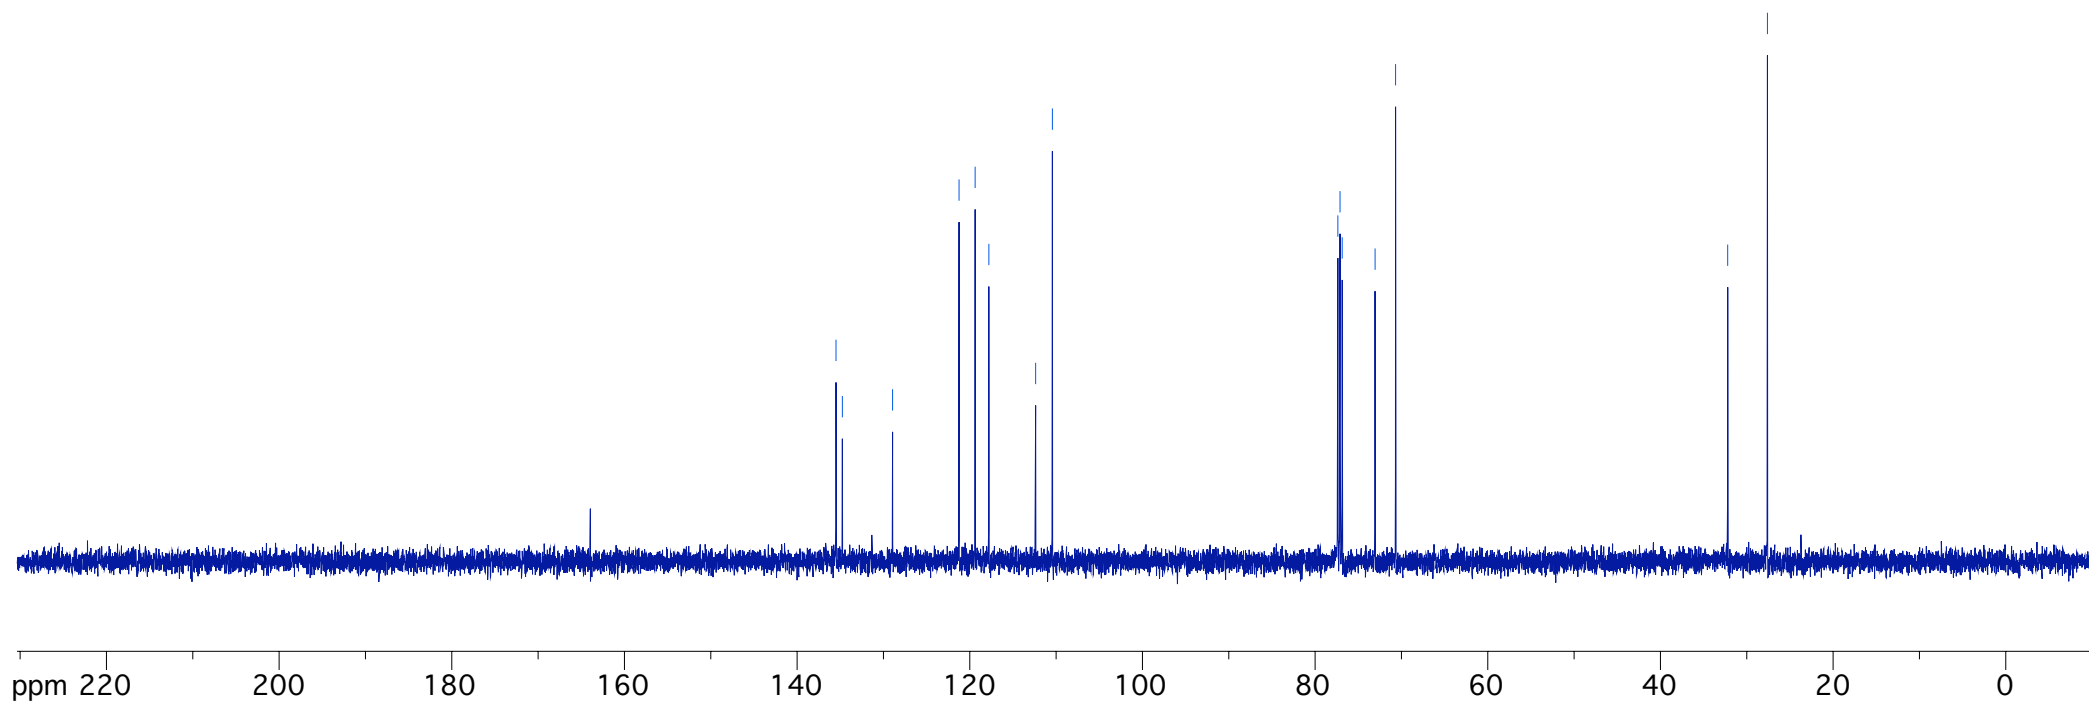

7.389  
7.385  
7.381  
7.373  
7.370  
7.364  
7.357  
7.354  
7.347  
7.332  
7.321  
7.319  
7.311  
7.307  
7.294  
7.260  
7.255  
7.253  
7.246  
7.242  
7.185  
7.178  
7.170  
7.166  
7.108  
7.091  
7.015  
7.013  
6.999  
6.990  
6.985  
6.982  
6.975  
6.959  
6.893  
6.876  
6.852  
6.837  
6.796  
6.778  
6.749  
6.744  
6.663  
6.655  
6.647  
6.640  
6.566  
6.551  
6.536  
6.513  
6.498  
6.484  
3.842  
3.798

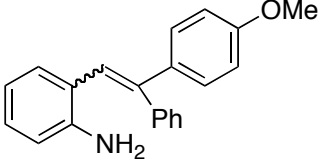

s32

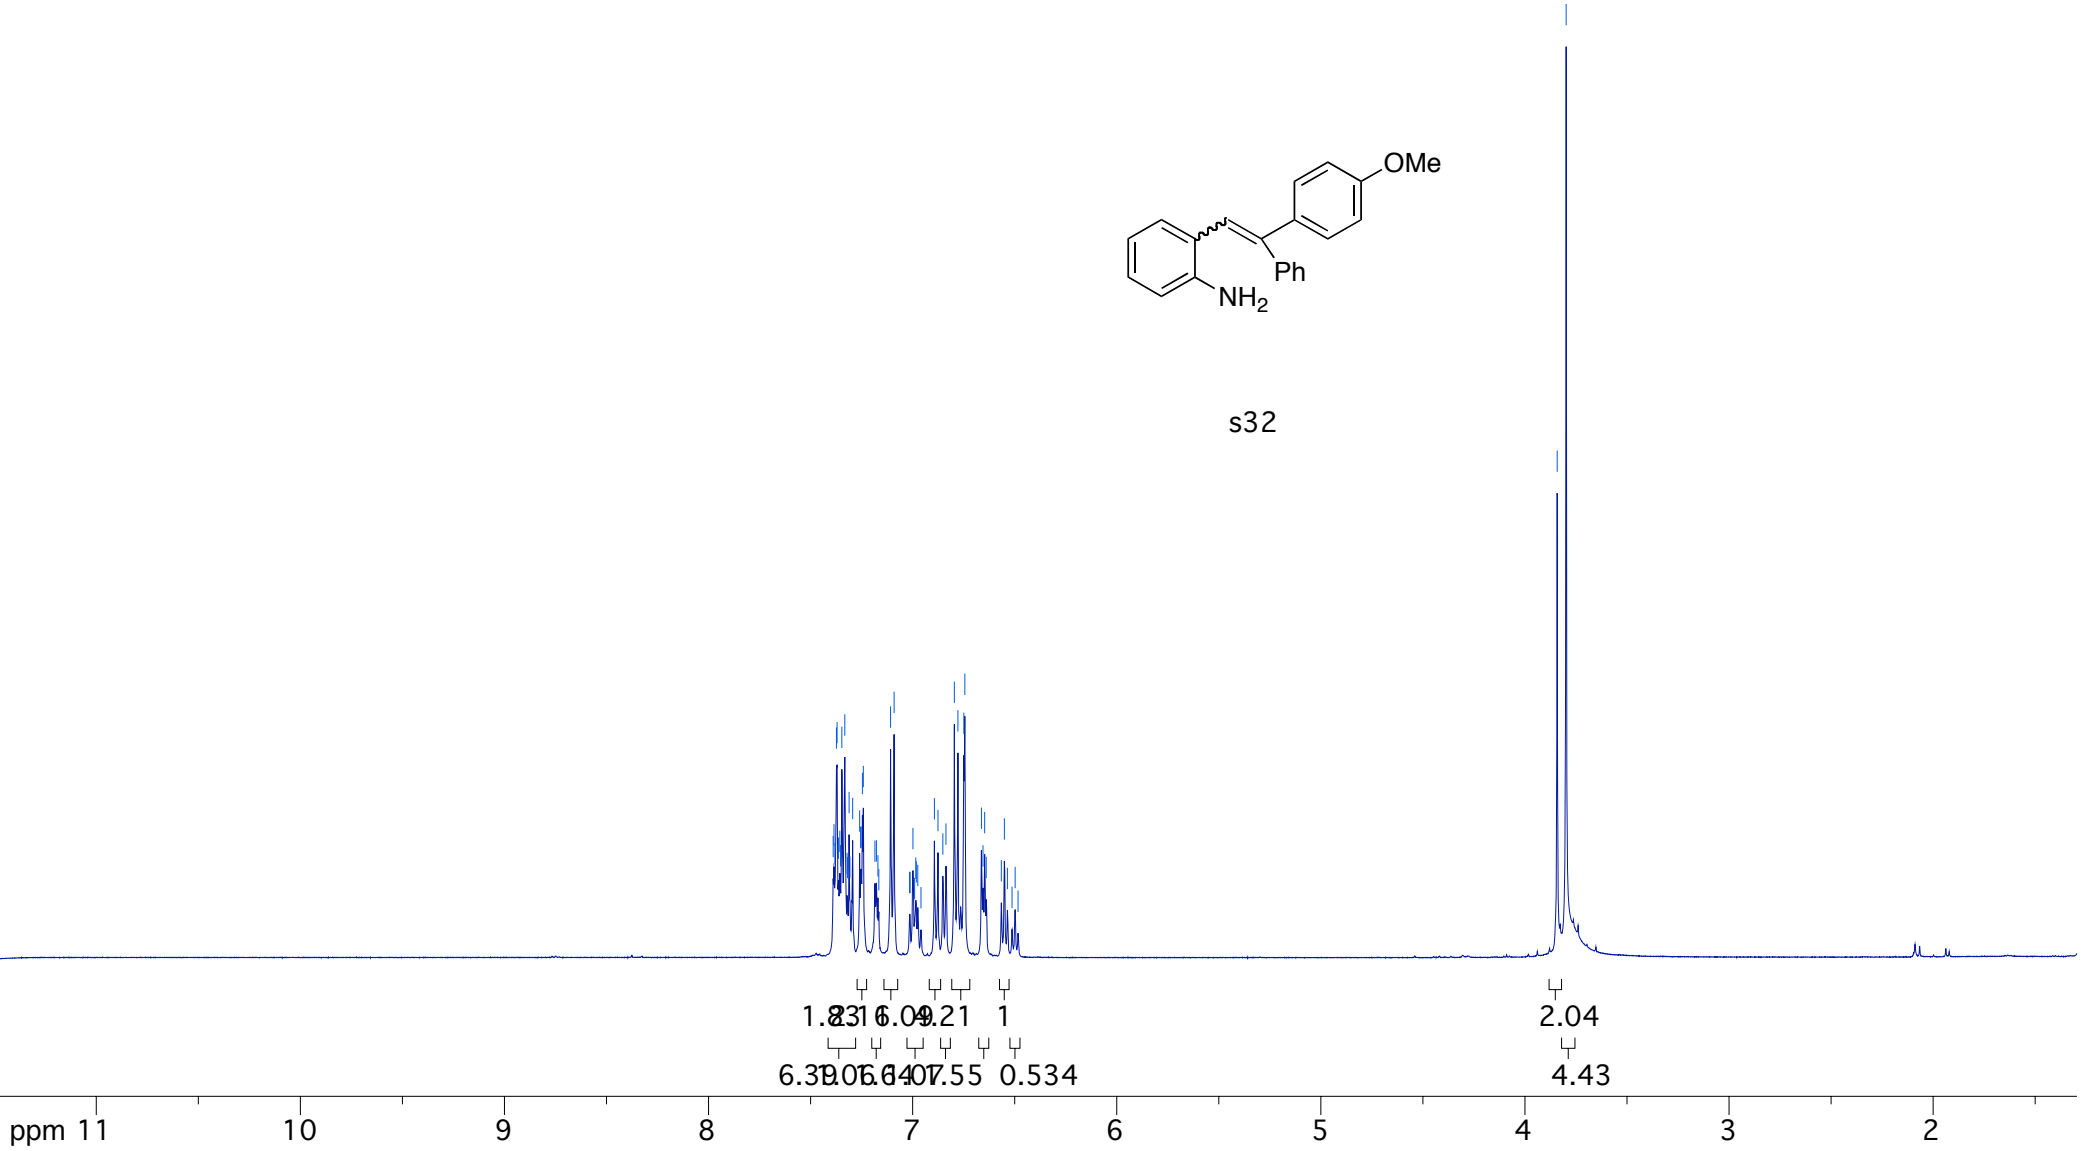

159.382  
158.898  
144.632  
144.530  
143.795  
143.645  
140.254  
136.009  
132.277  
131.703  
130.509  
130.426  
130.382  
129.282  
128.252  
128.193  
127.928  
127.841  
127.621  
127.352  
123.904  
123.834  
122.802  
118.262  
118.189  
115.528  
115.426  
113.629

77.342  
77.086  
76.834

55.386  
55.180

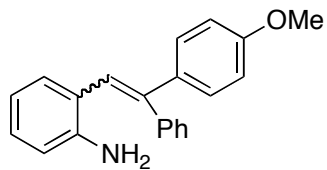

s32

ppm 220 200 180 160 140 120 100 80 60 40 20 0

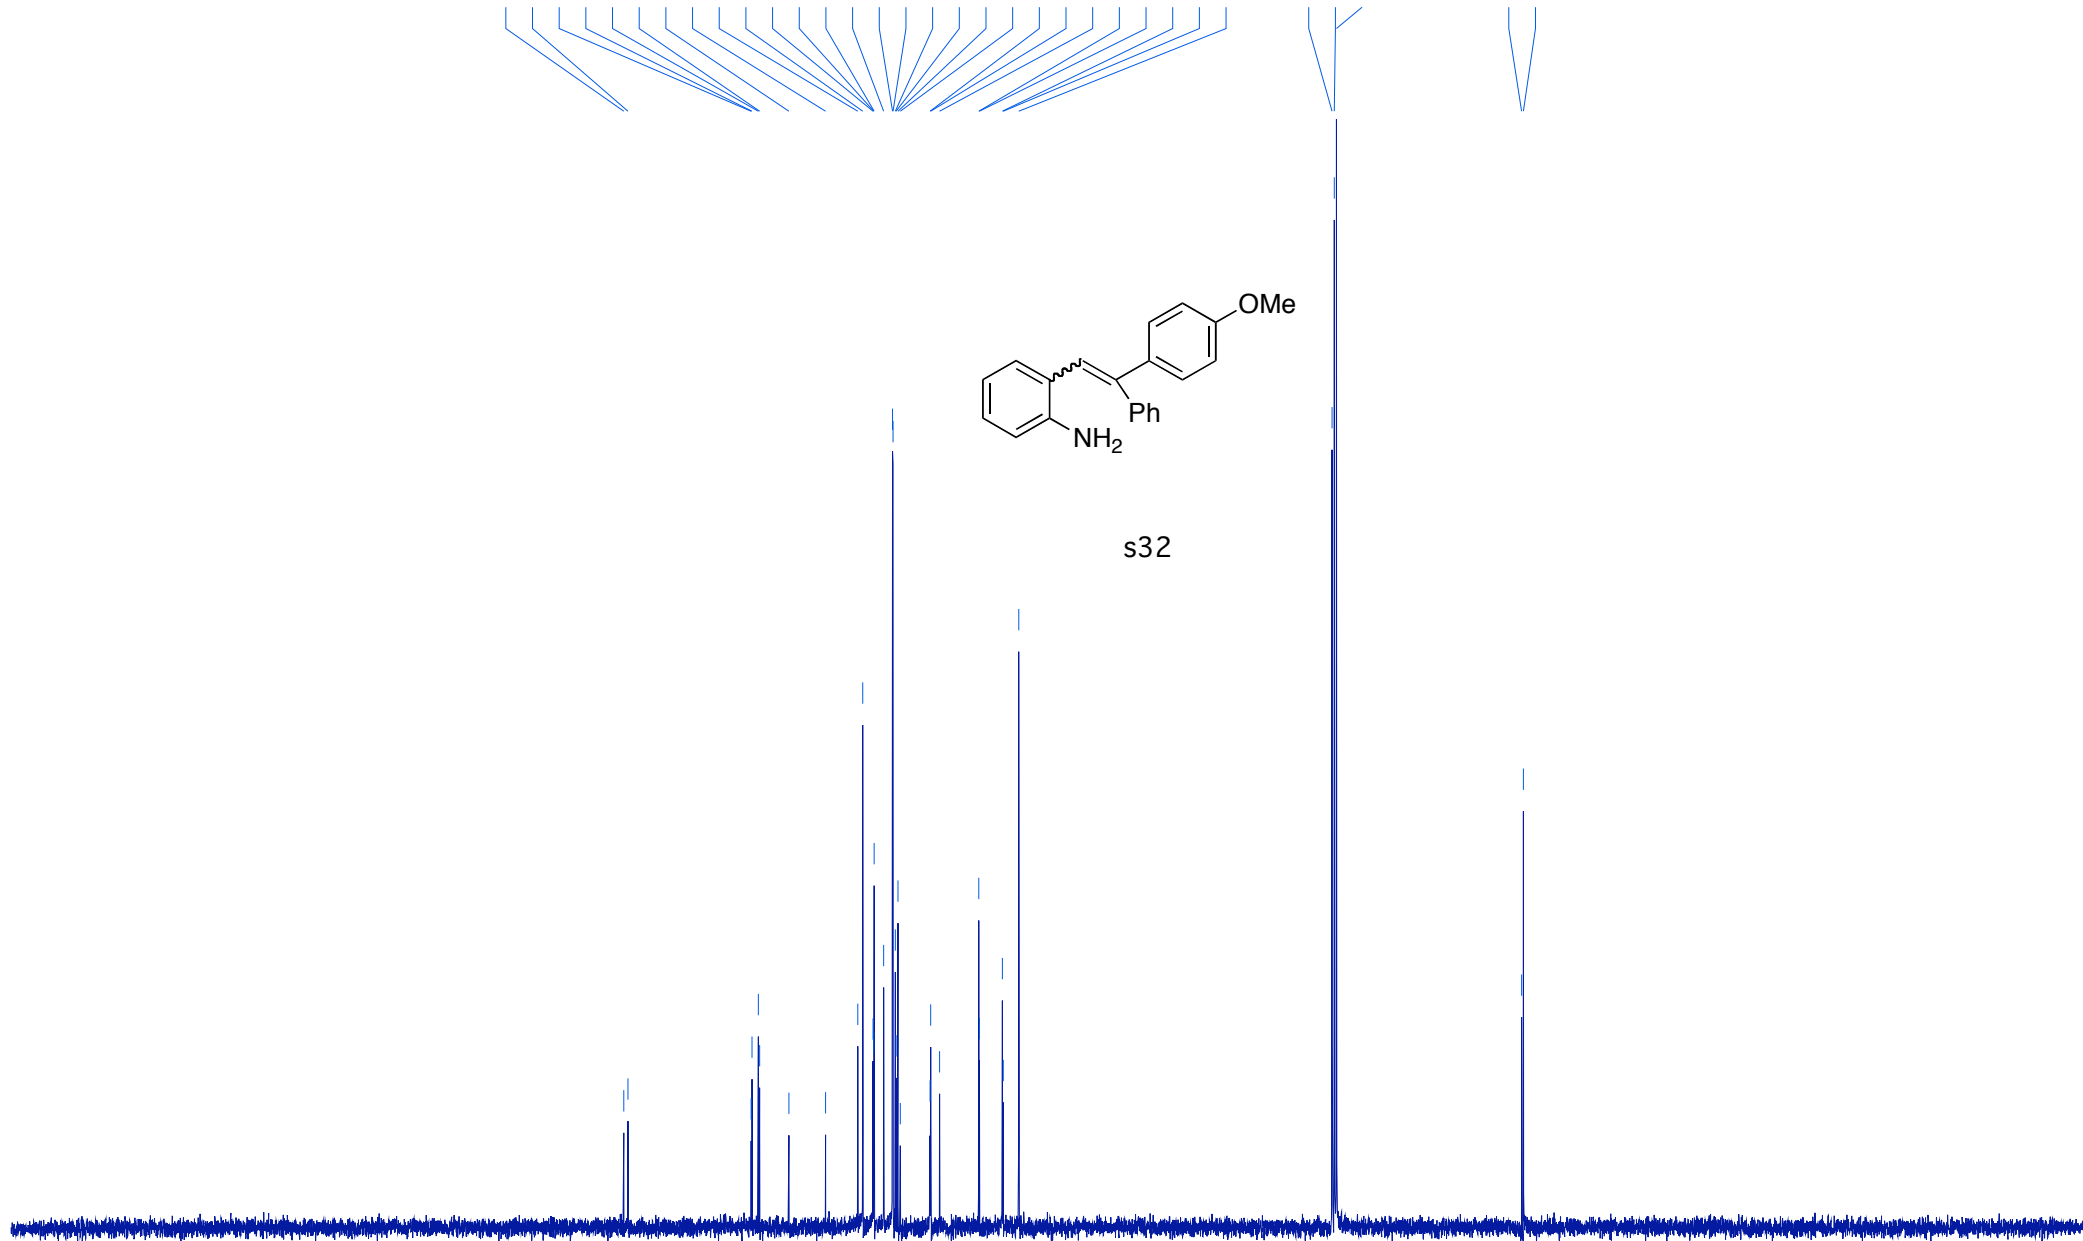

7.361  
7.345  
7.332  
7.320  
7.316  
7.312  
7.303  
7.289  
7.281  
7.276  
7.272  
7.260  
7.174  
7.164  
7.161  
7.153  
7.148  
7.137  
7.124  
7.087  
7.069  
6.957  
6.949  
6.879  
6.867  
6.862  
6.829  
6.816  
6.811  
6.804  
6.778  
6.766

3.833  
3.819

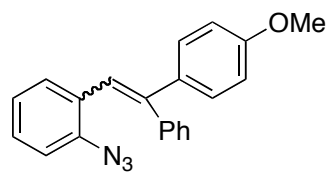

27a

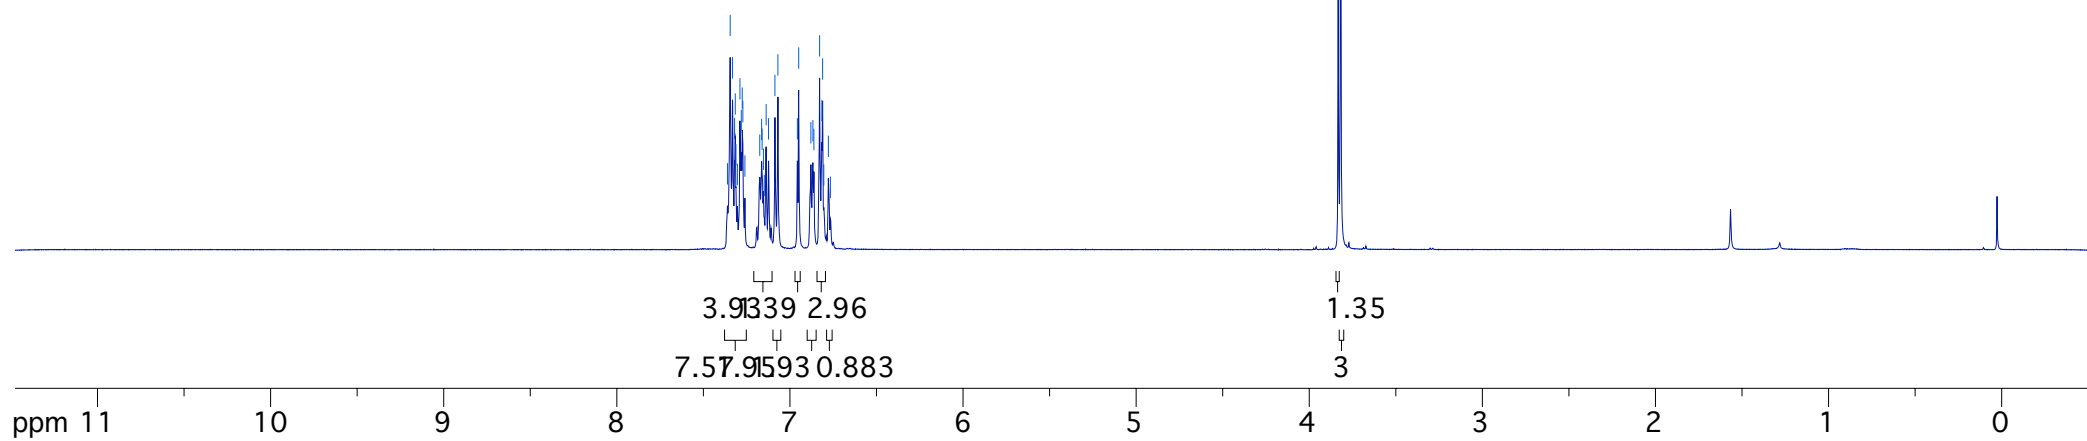

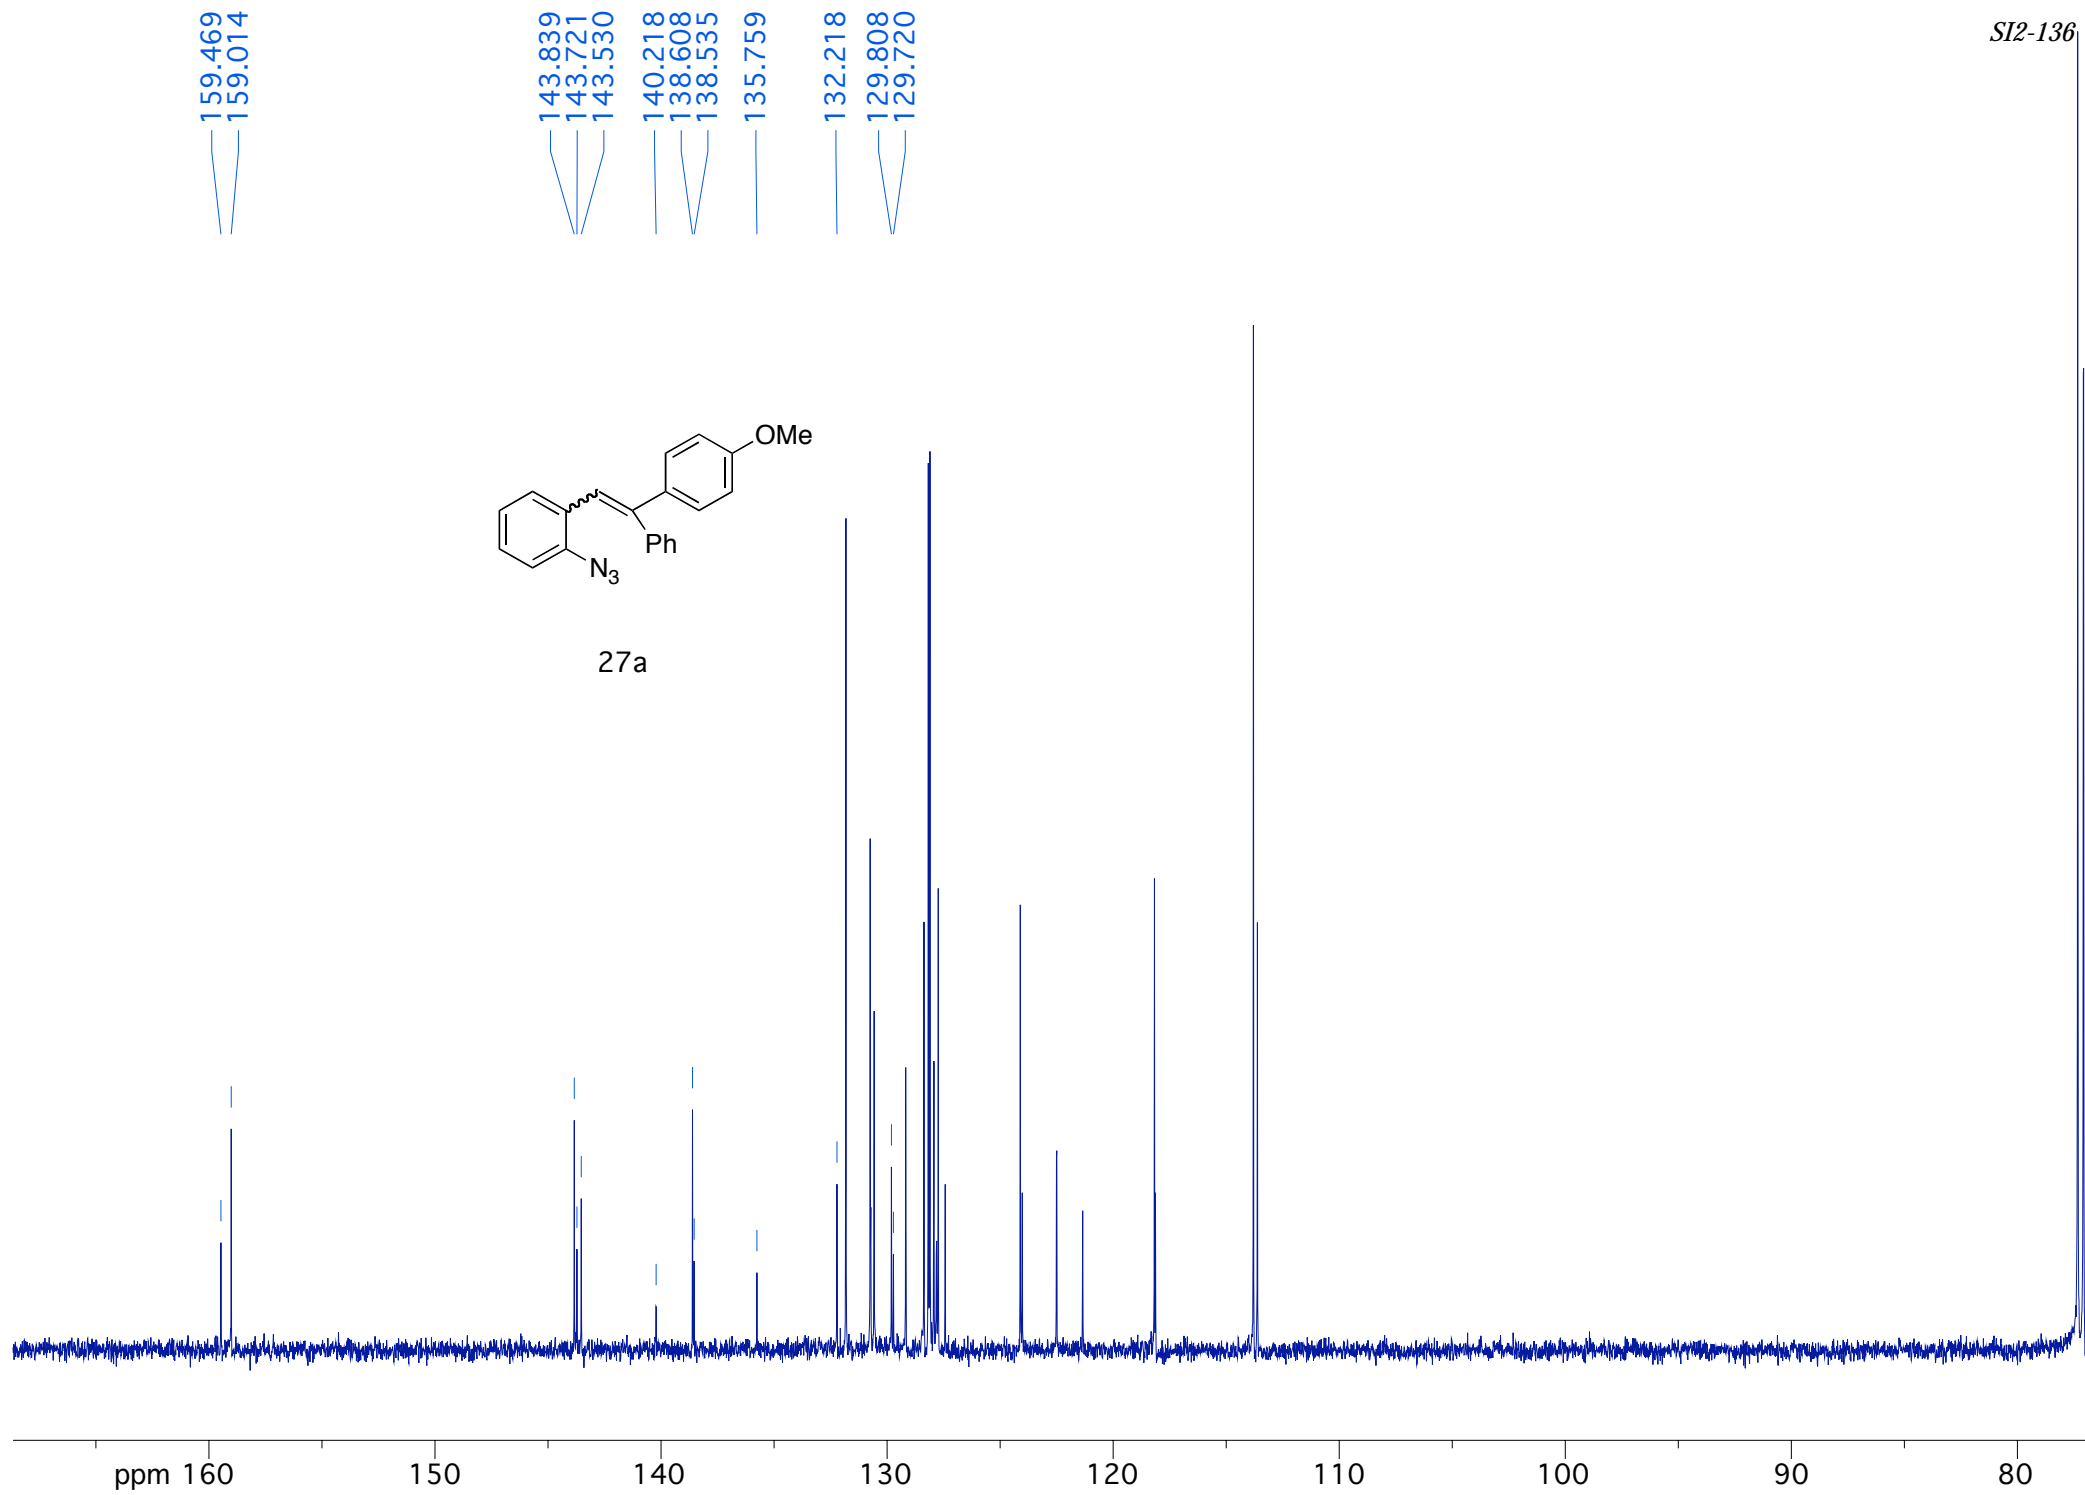





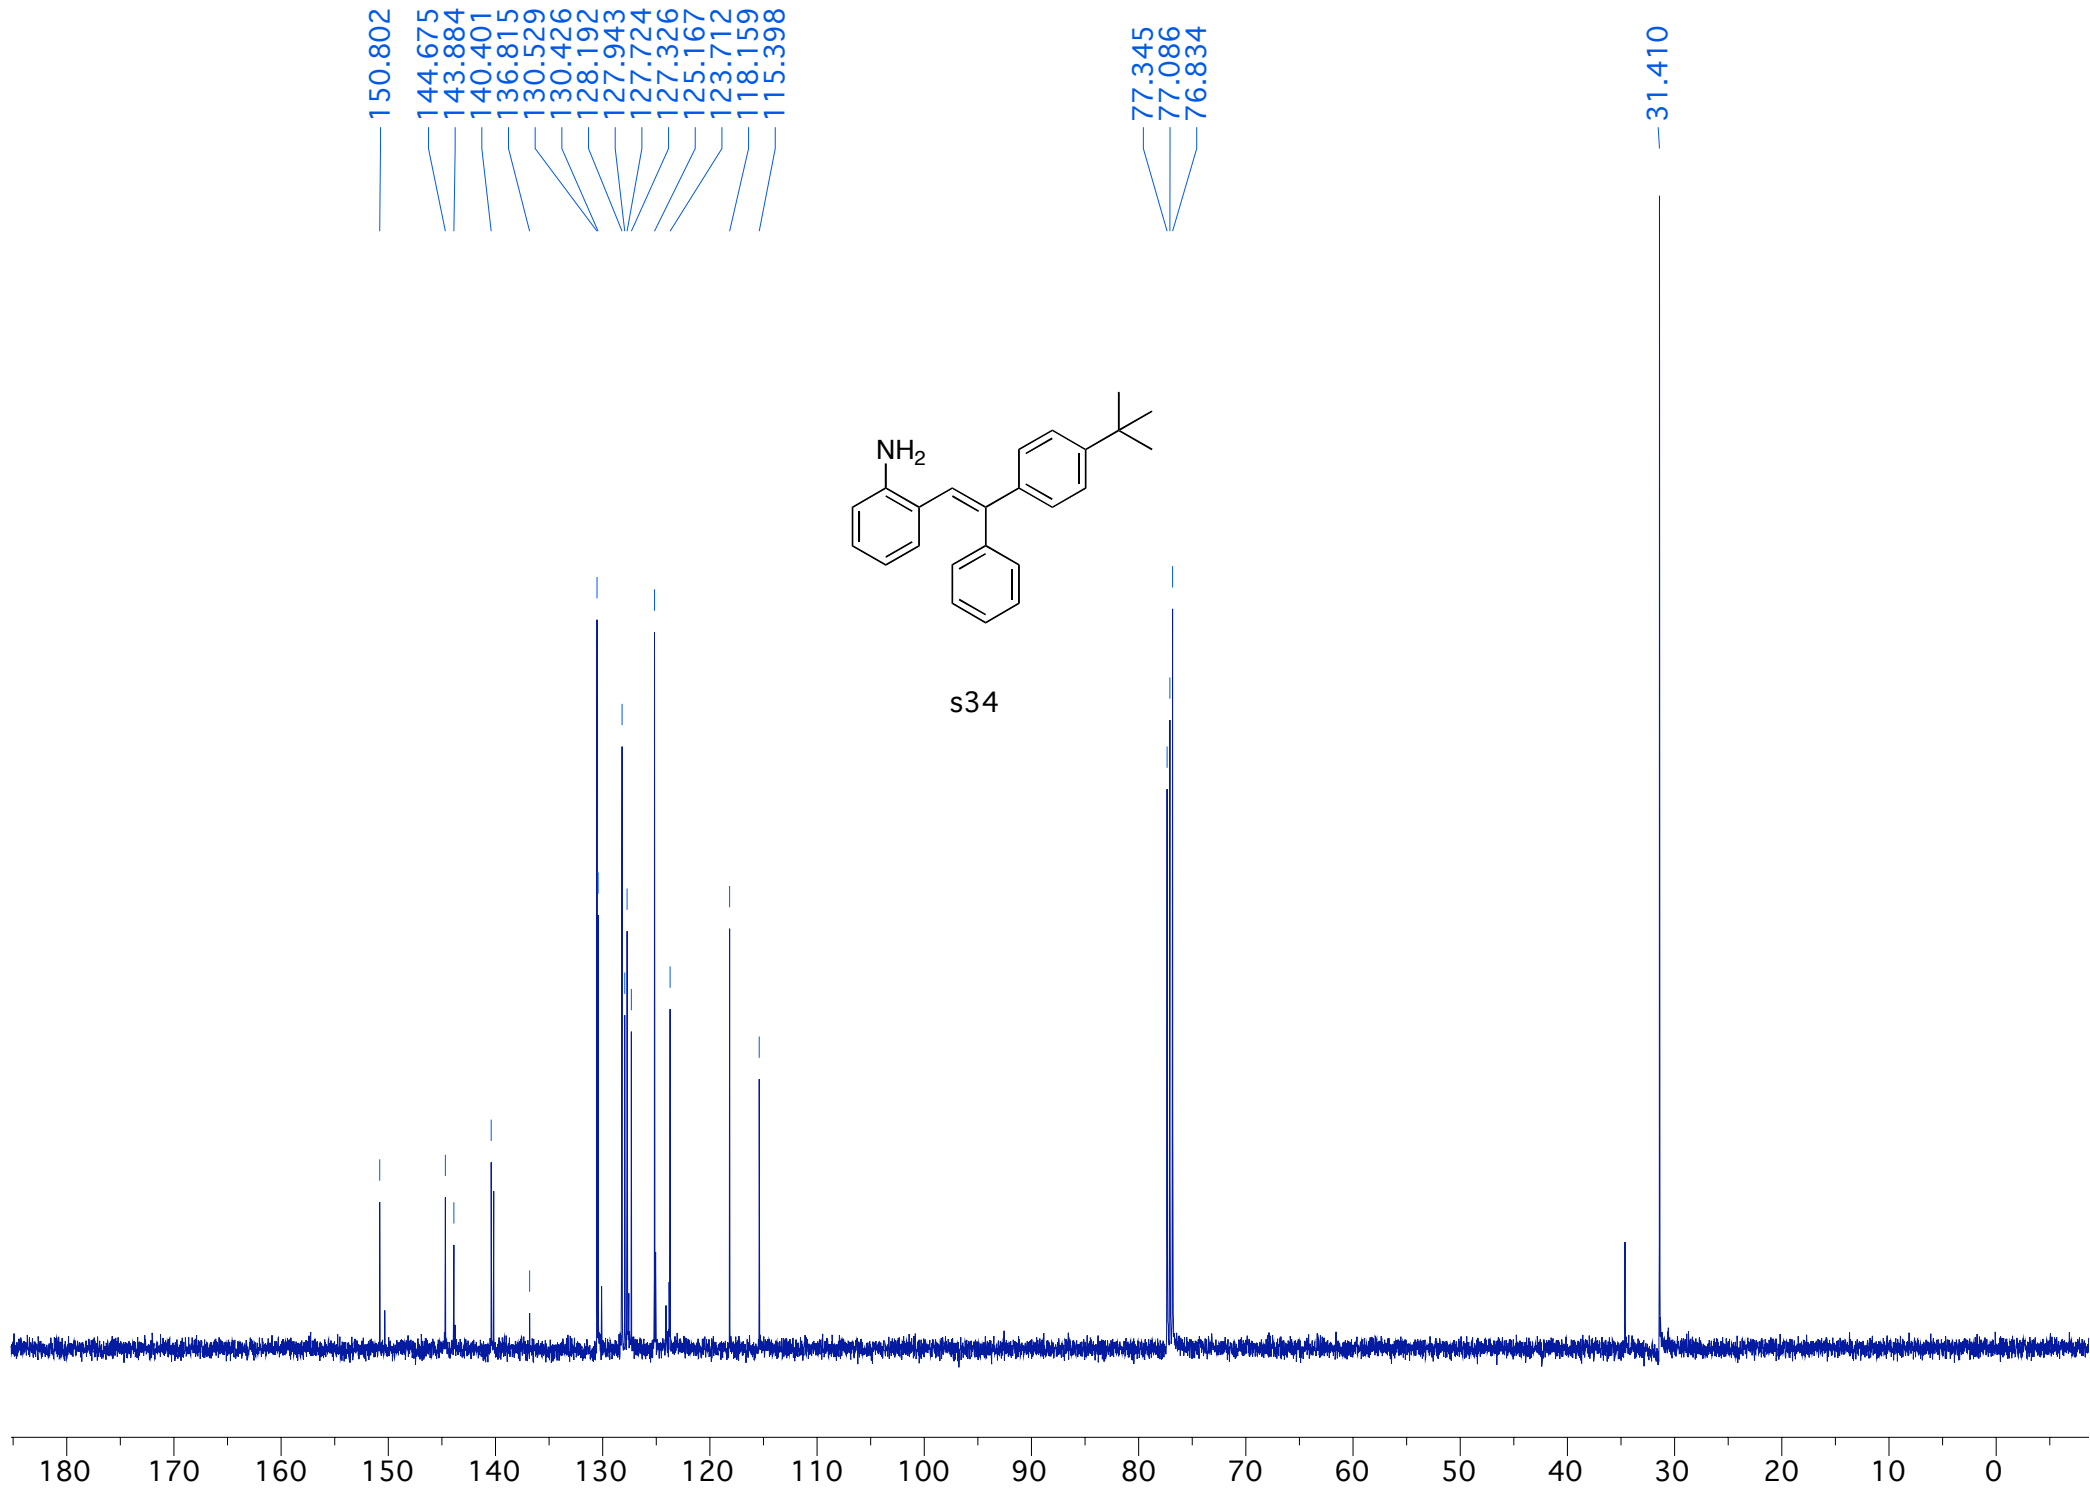

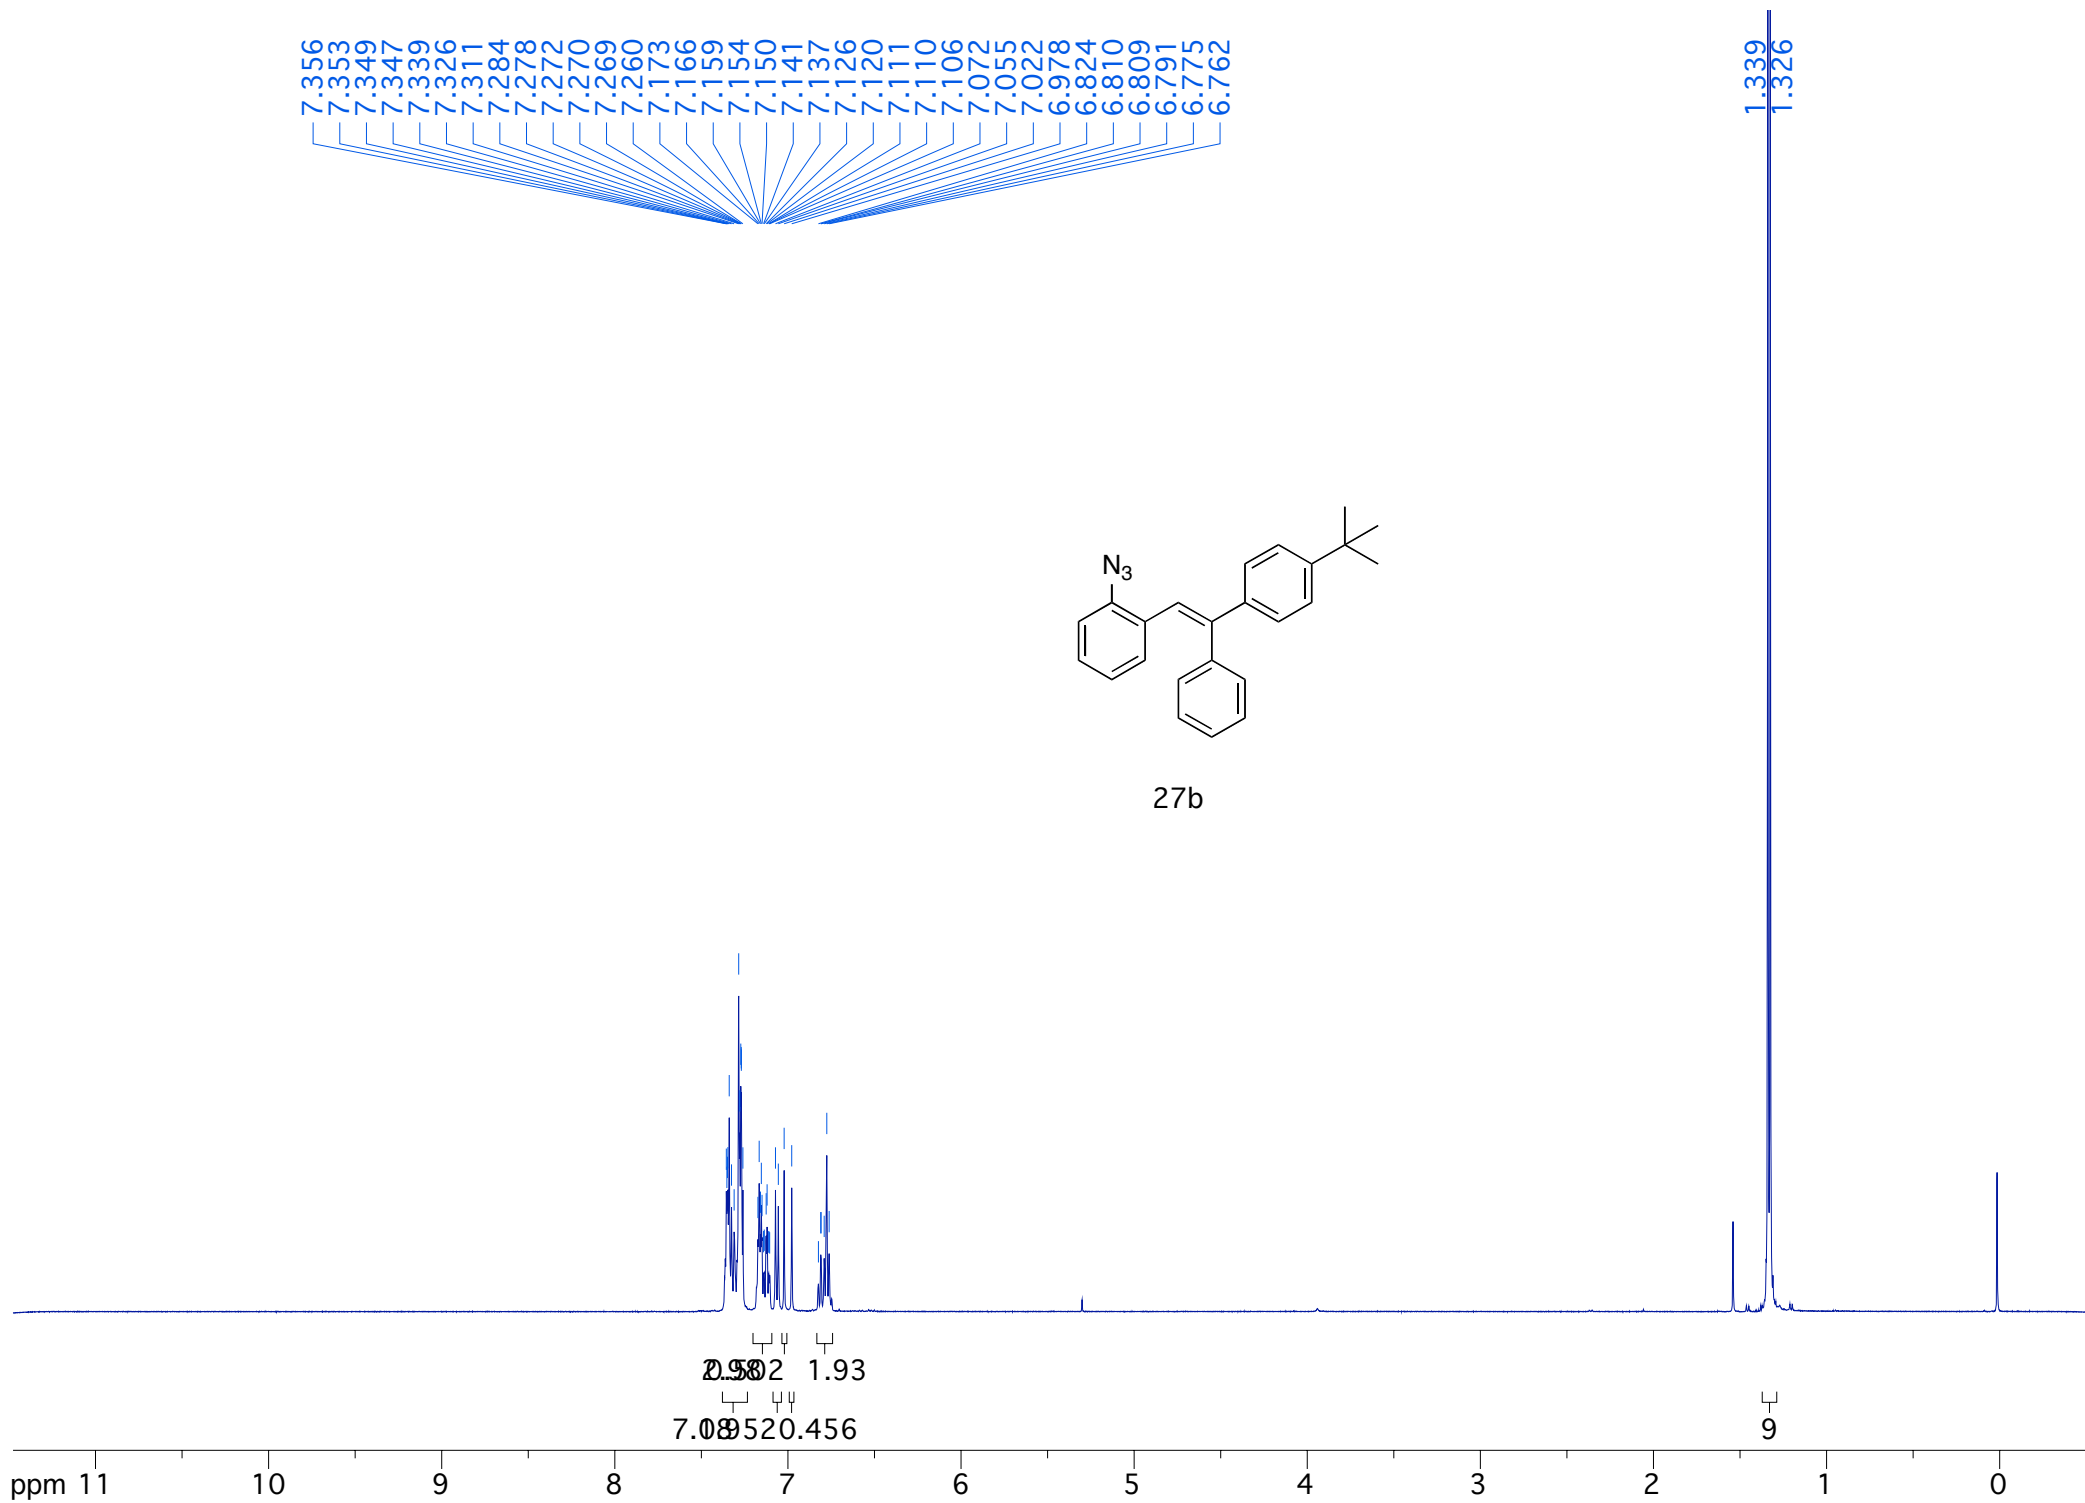

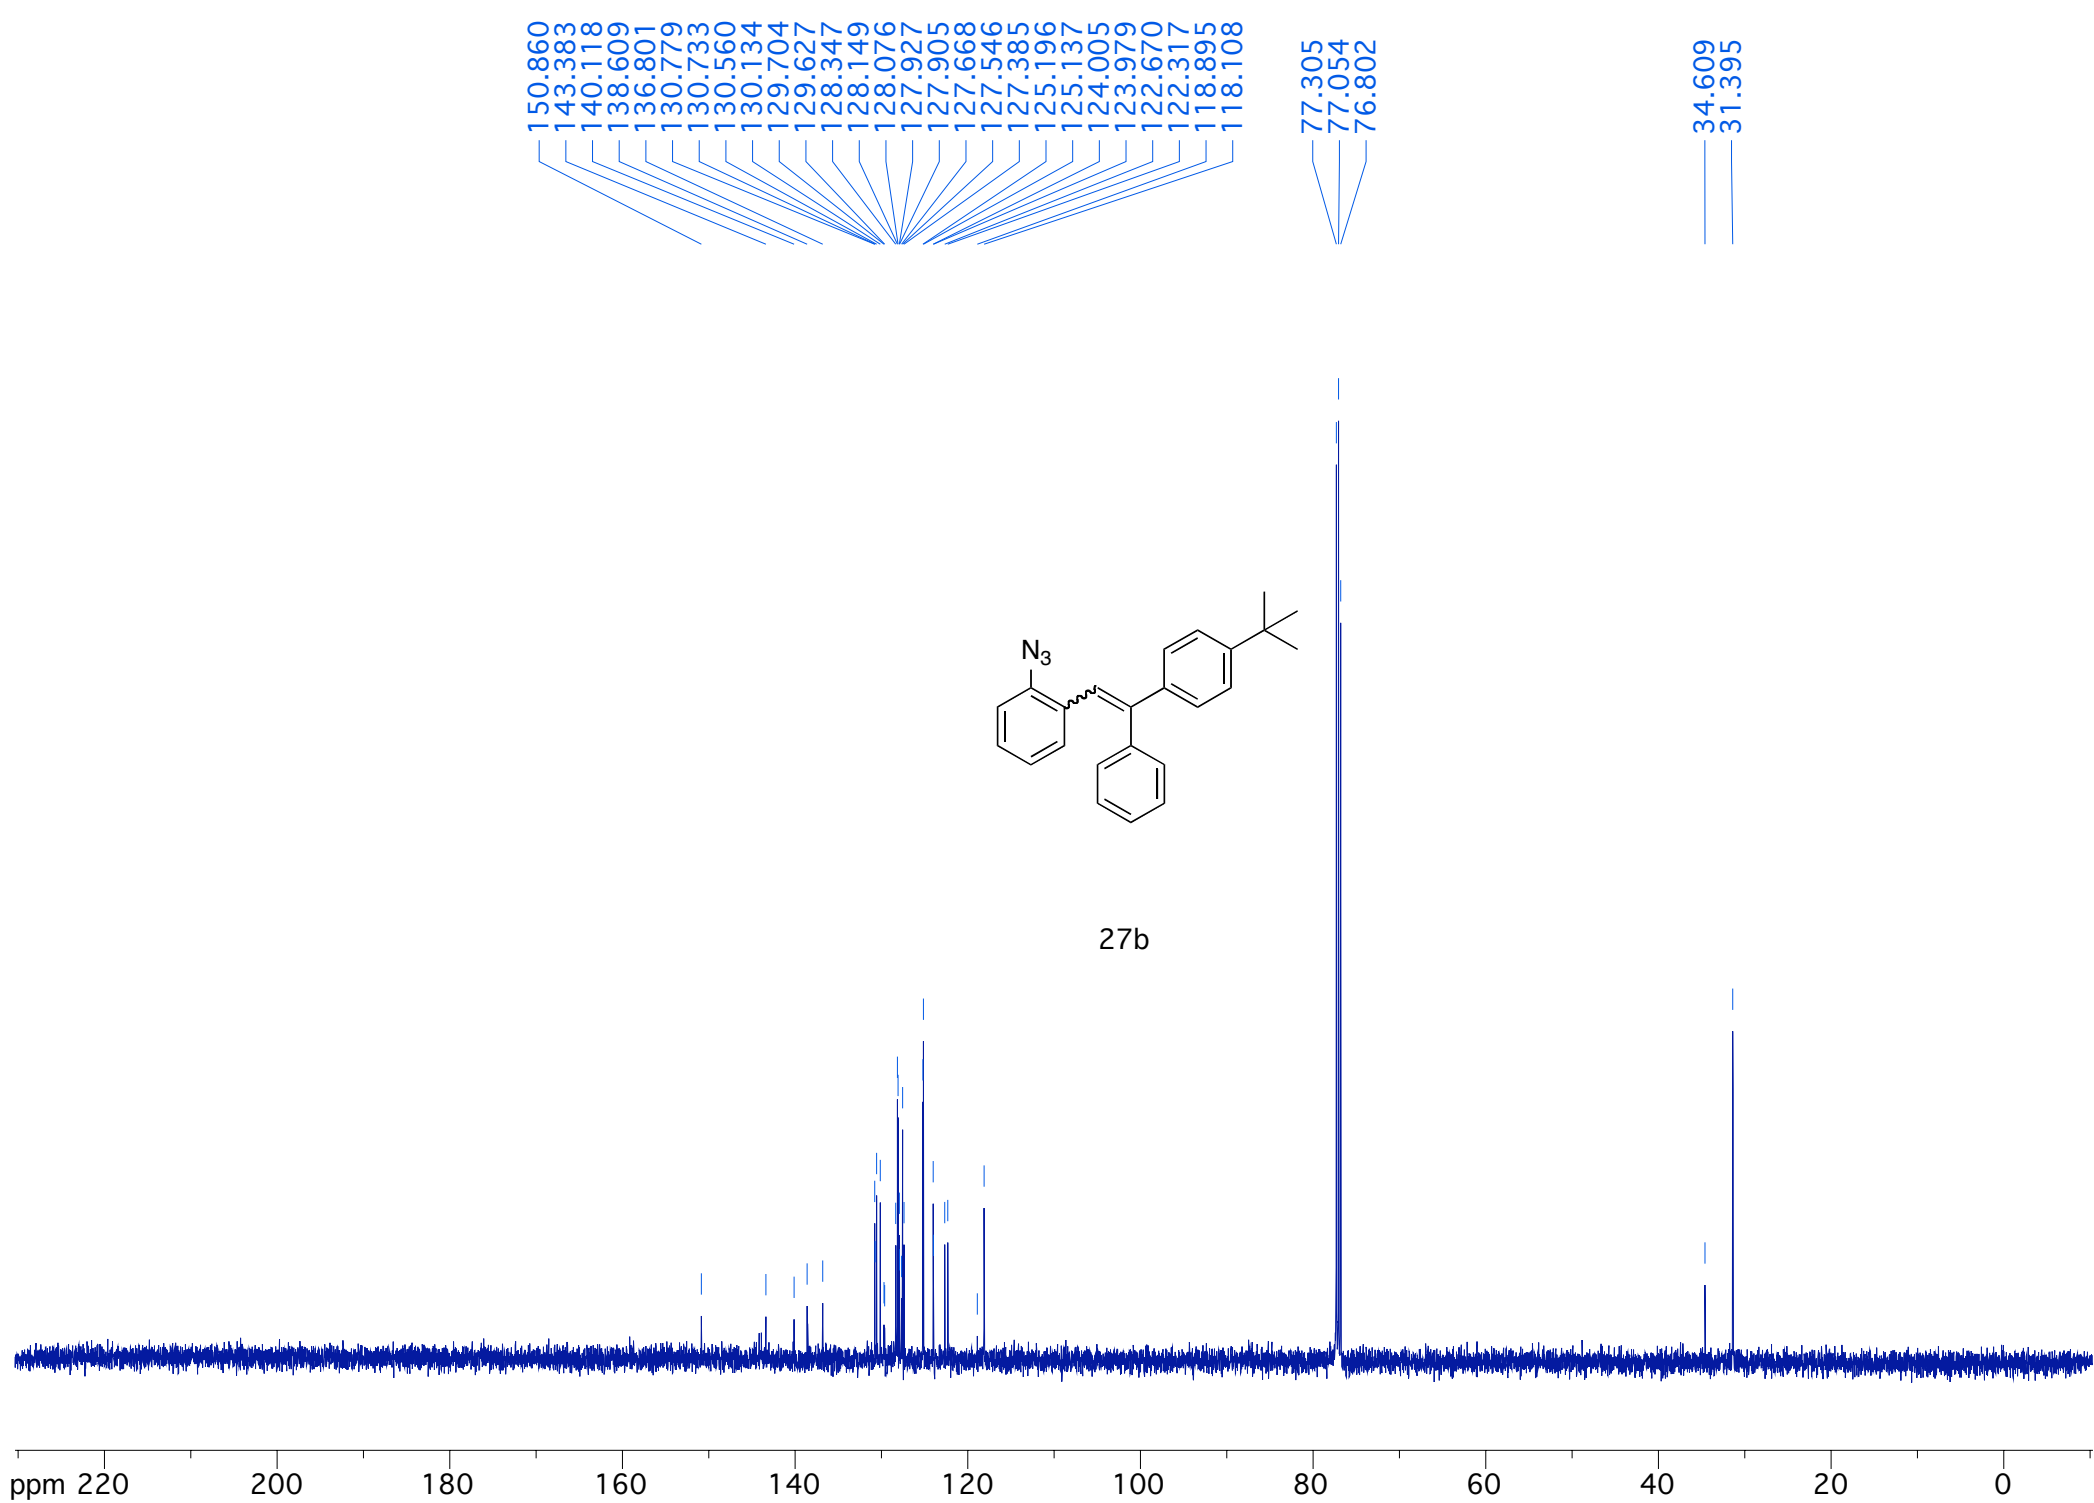

7.701  
7.699  
7.685  
7.649  
7.633  
7.564  
7.547  
7.527  
7.513  
7.497  
7.483  
7.470  
7.467  
7.431  
7.417  
7.405  
7.337  
7.334  
7.327  
7.323  
7.303  
7.291  
7.284  
7.276  
7.272  
7.260  
7.067  
7.064  
7.051  
7.036  
7.034  
6.953  
6.863  
6.848  
6.712  
6.711  
6.696  
6.602  
6.588  
6.573  
6.559  
3.920

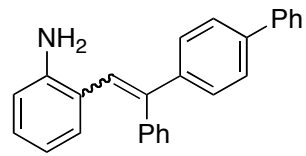

s36

5.07 2.09 0.882 1.06  
4.11 6.71 0.39 1.1 1.08

ppm 11 10 9 8 7 6 5 4 3 2 1 0

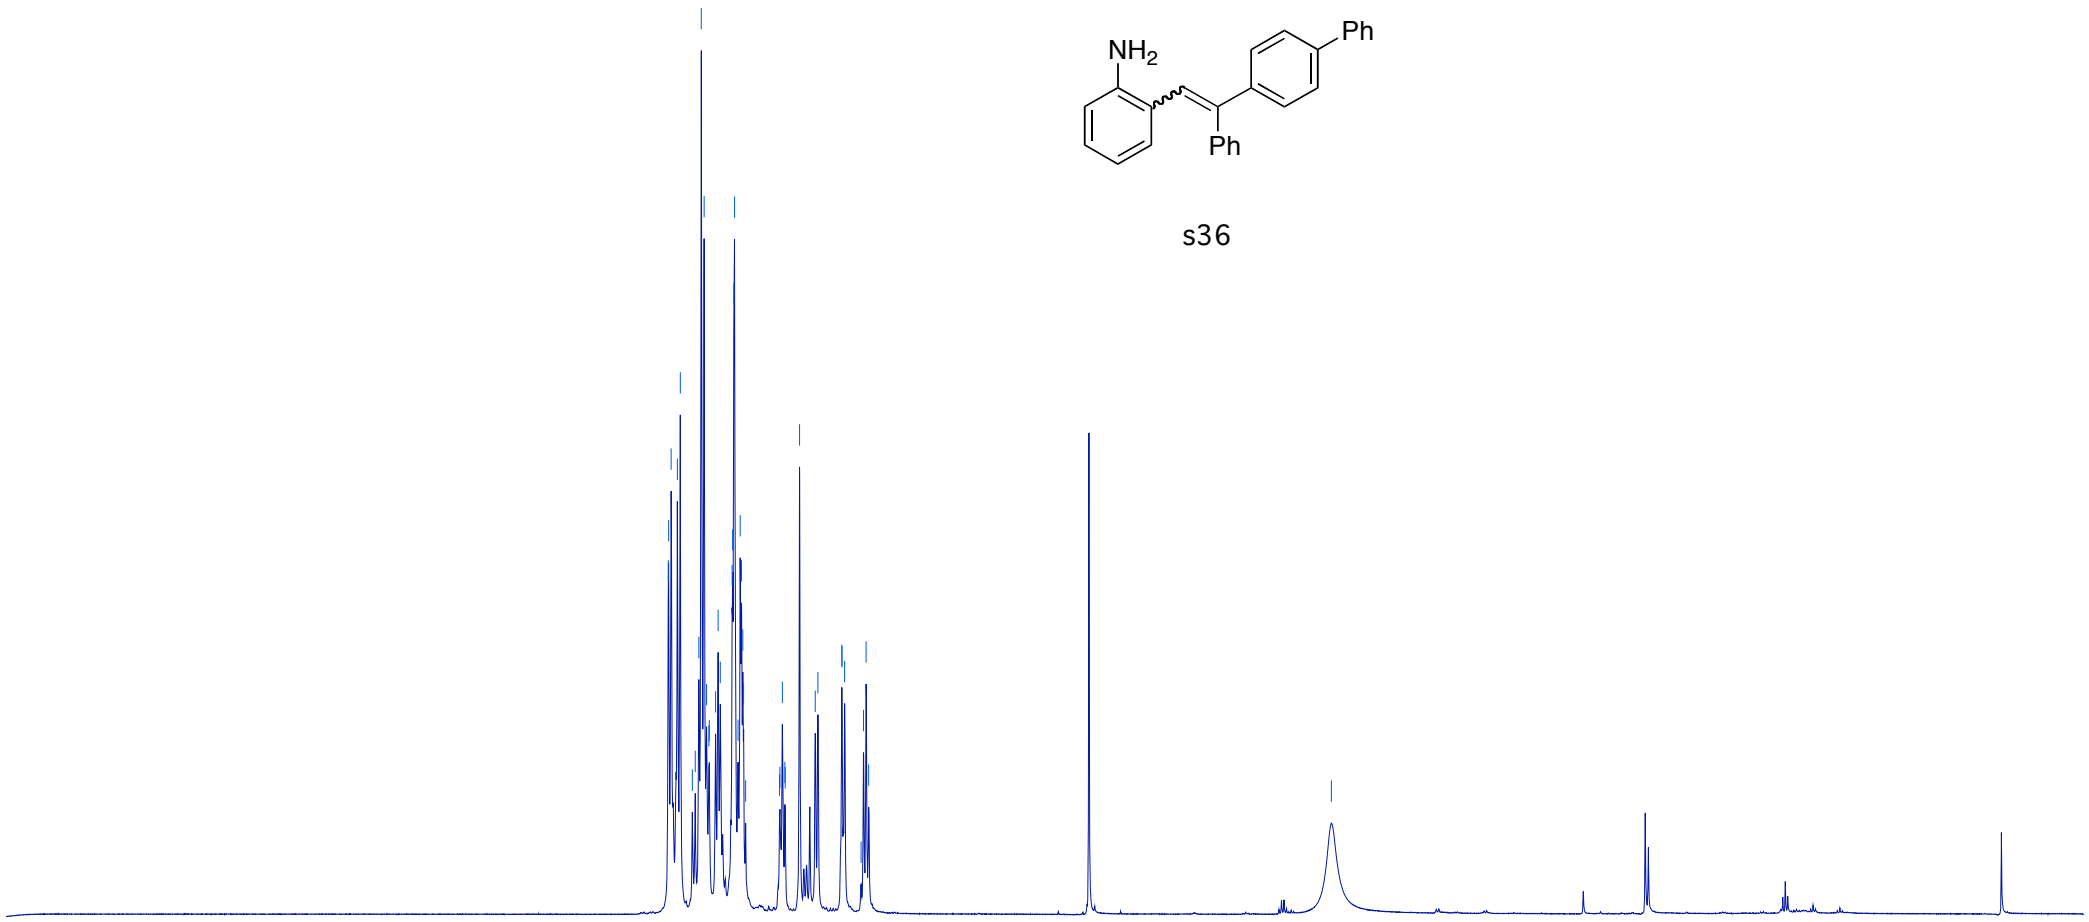

144.793  
143.665  
142.442  
140.750  
140.507  
140.048  
131.072  
130.630  
130.484  
128.941  
128.869  
128.589  
128.383  
128.195  
127.561  
127.475  
127.118  
127.007  
124.432  
123.712  
118.293  
115.590  
  
77.451  
77.199  
76.941

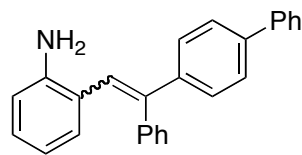

s36

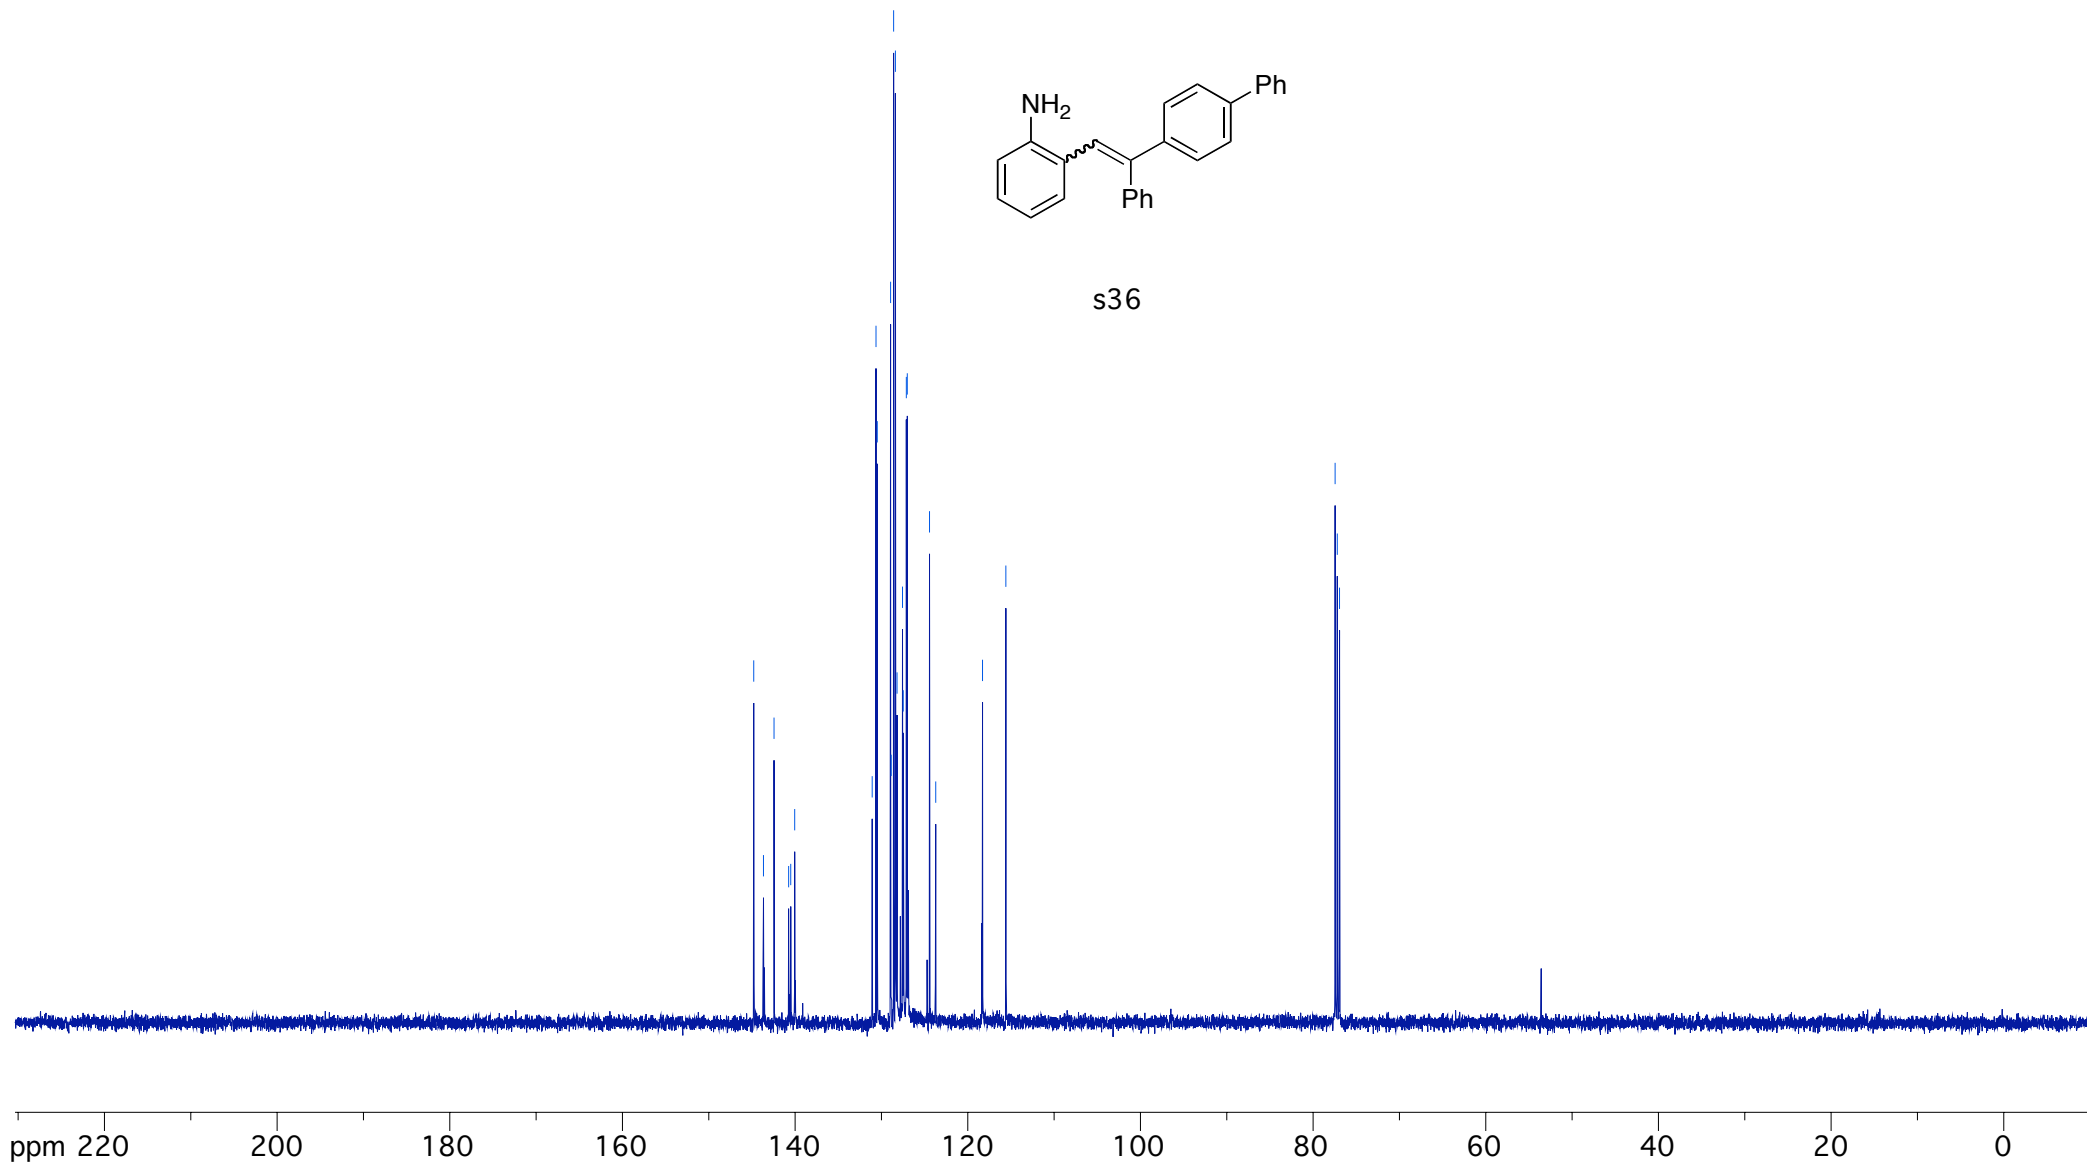

7.657  
7.655  
7.653  
7.652  
7.650  
7.648  
7.646  
7.645  
7.642  
7.641  
7.639  
7.636  
7.634  
7.632  
7.630  
7.630  
7.593  
7.592  
7.589  
7.582  
7.577  
7.576  
7.555  
7.551  
7.544  
7.539  
7.538  
7.535  
7.483  
7.479  
7.477  
7.476  
7.475  
7.474  
7.468  
7.466  
7.461  
7.458  
7.456  
7.453  
7.450  
7.448  
7.446  
7.444  
7.433  
7.428  
7.427  
7.417  
7.416  
7.414  
7.412  
7.408  
7.404  
7.403  
7.401  
7.399  
7.398  
7.396  
7.393  
7.391  
7.389  
7.387  
7.385  
7.382  
7.380  
7.378  
7.376  
7.374  
7.373  
7.371  
7.368  
7.366  
7.362  
7.360  
7.358  
7.354  
7.353  
7.351  
7.349  
7.345  
7.343  
7.339  
7.337  
7.335  
7.332  
7.330  
7.328

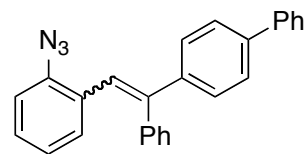

27c

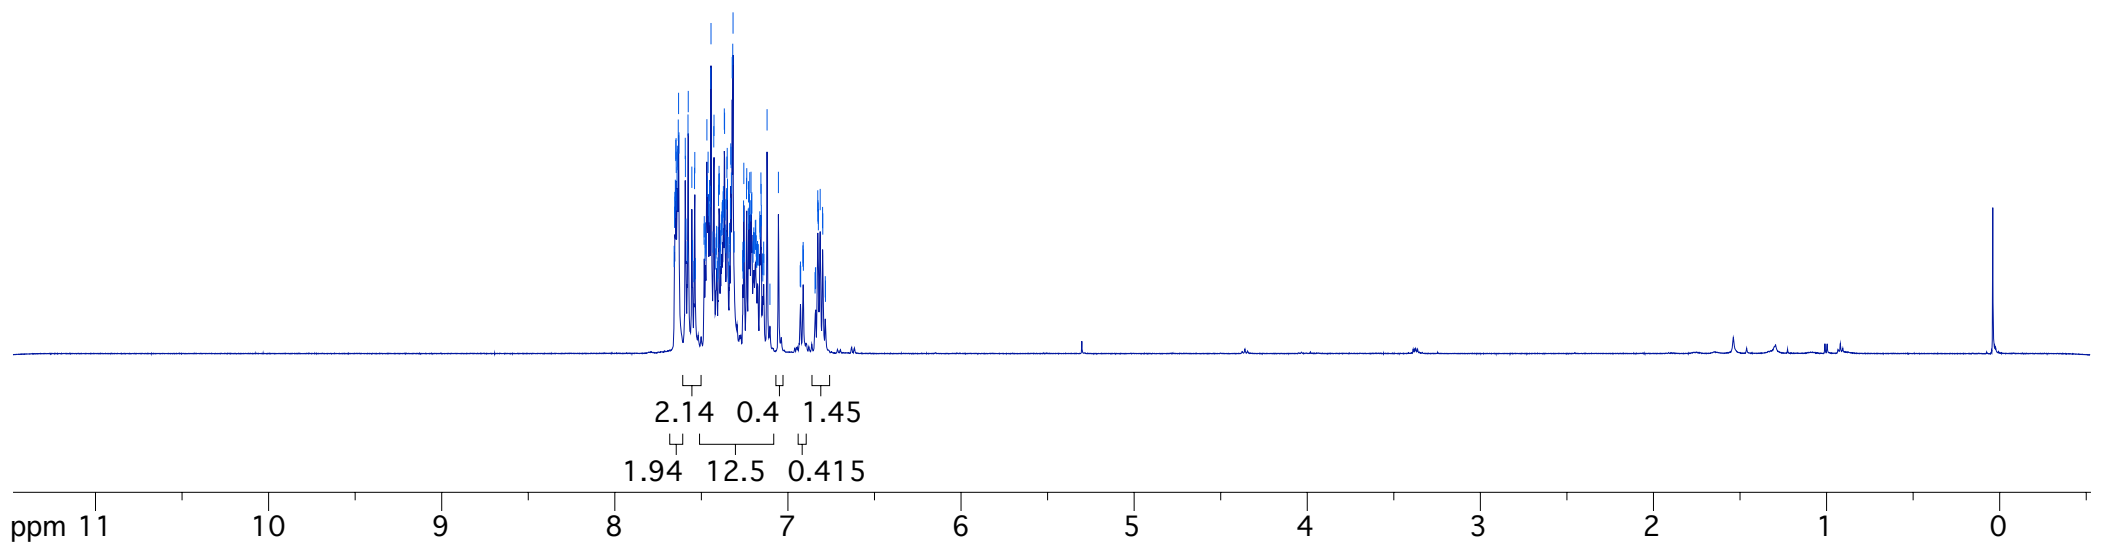

143.838  
143.695  
143.207  
142.090  
140.739  
140.622  
140.562  
140.092  
139.959  
139.034  
138.698  
131.087  
130.837  
130.764  
130.604  
129.529  
129.456  
128.839  
128.486  
128.278  
128.149  
127.855  
127.575  
127.413  
127.385  
127.061  
126.988  
126.944  
124.167  
124.065  
123.272  
122.977  
118.174  
77.331  
77.075  
76.820

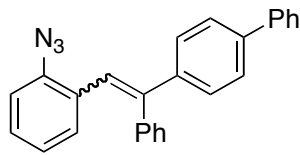

27c

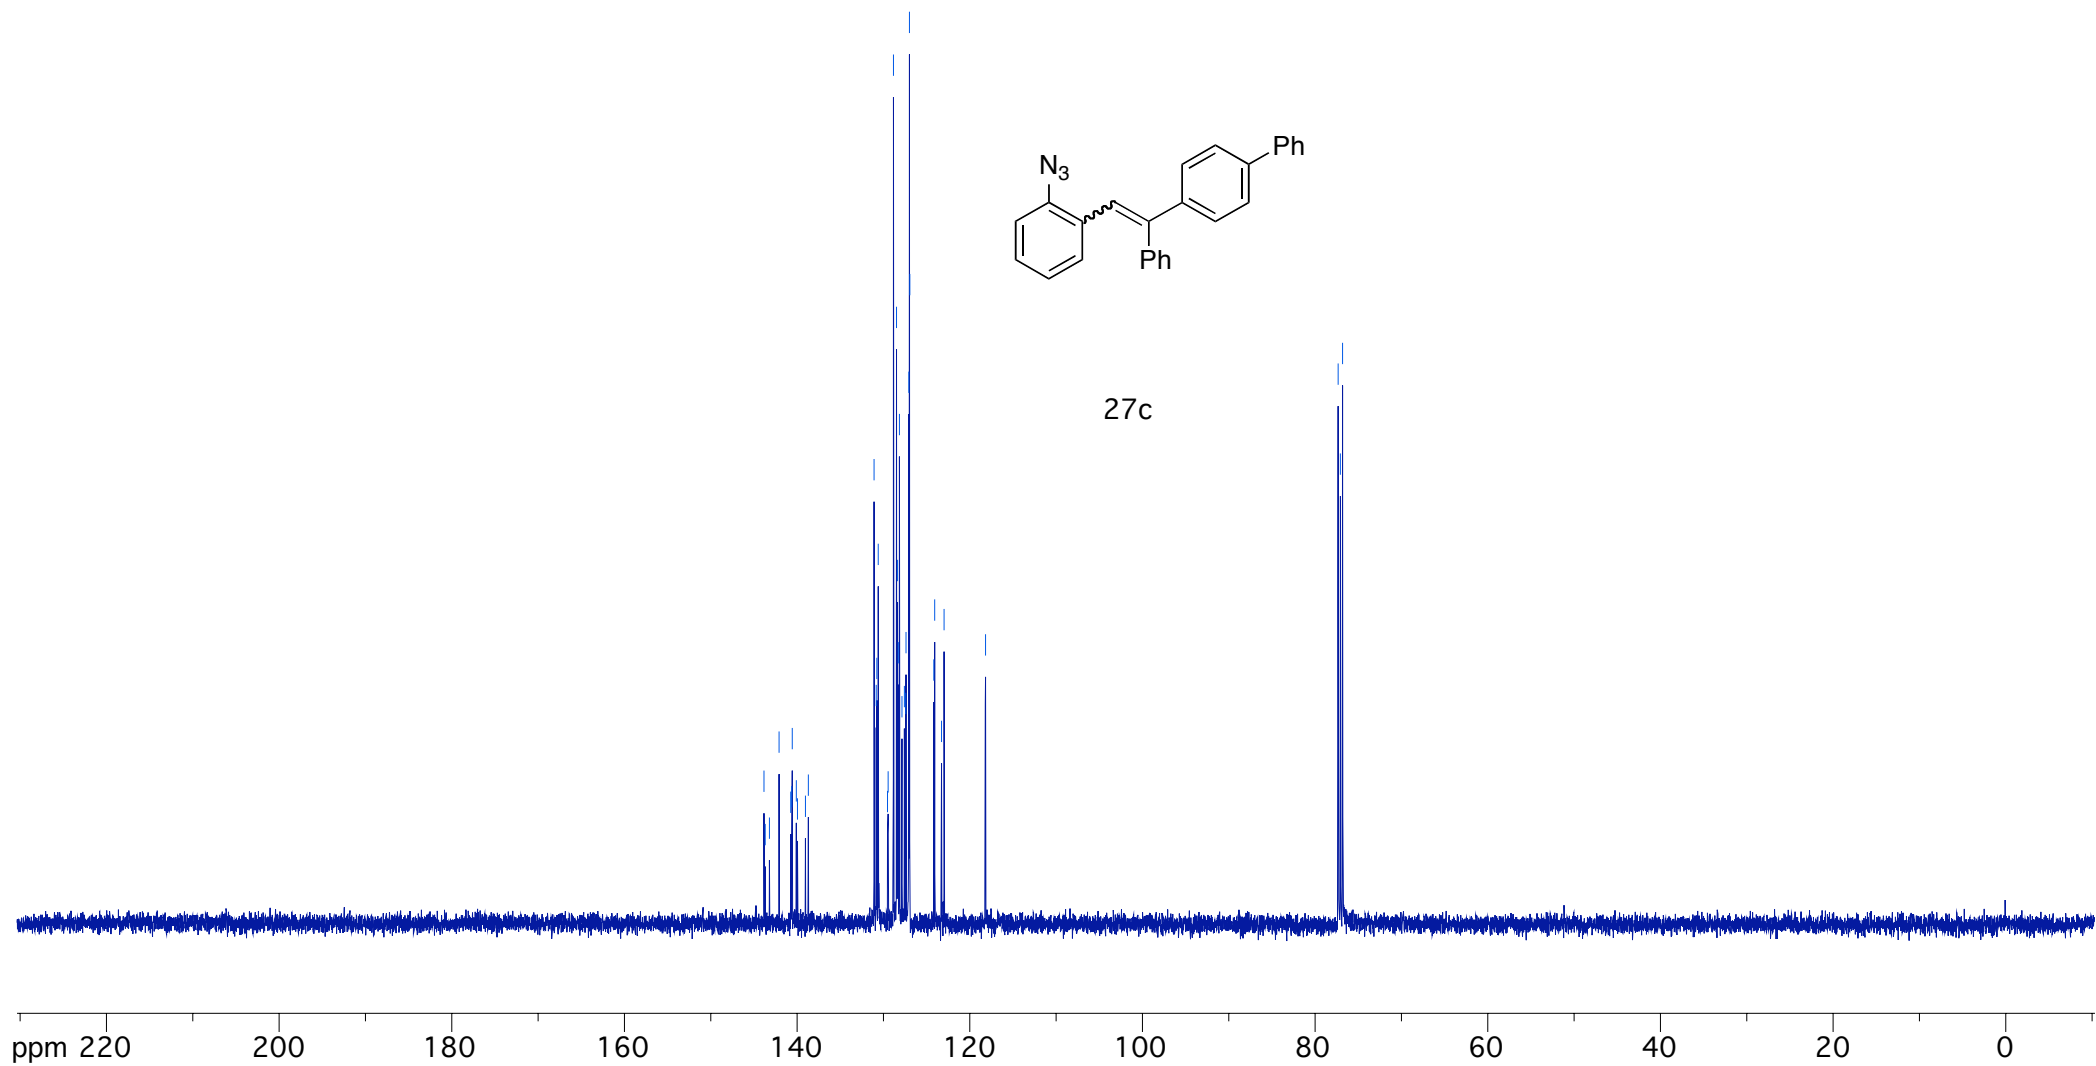



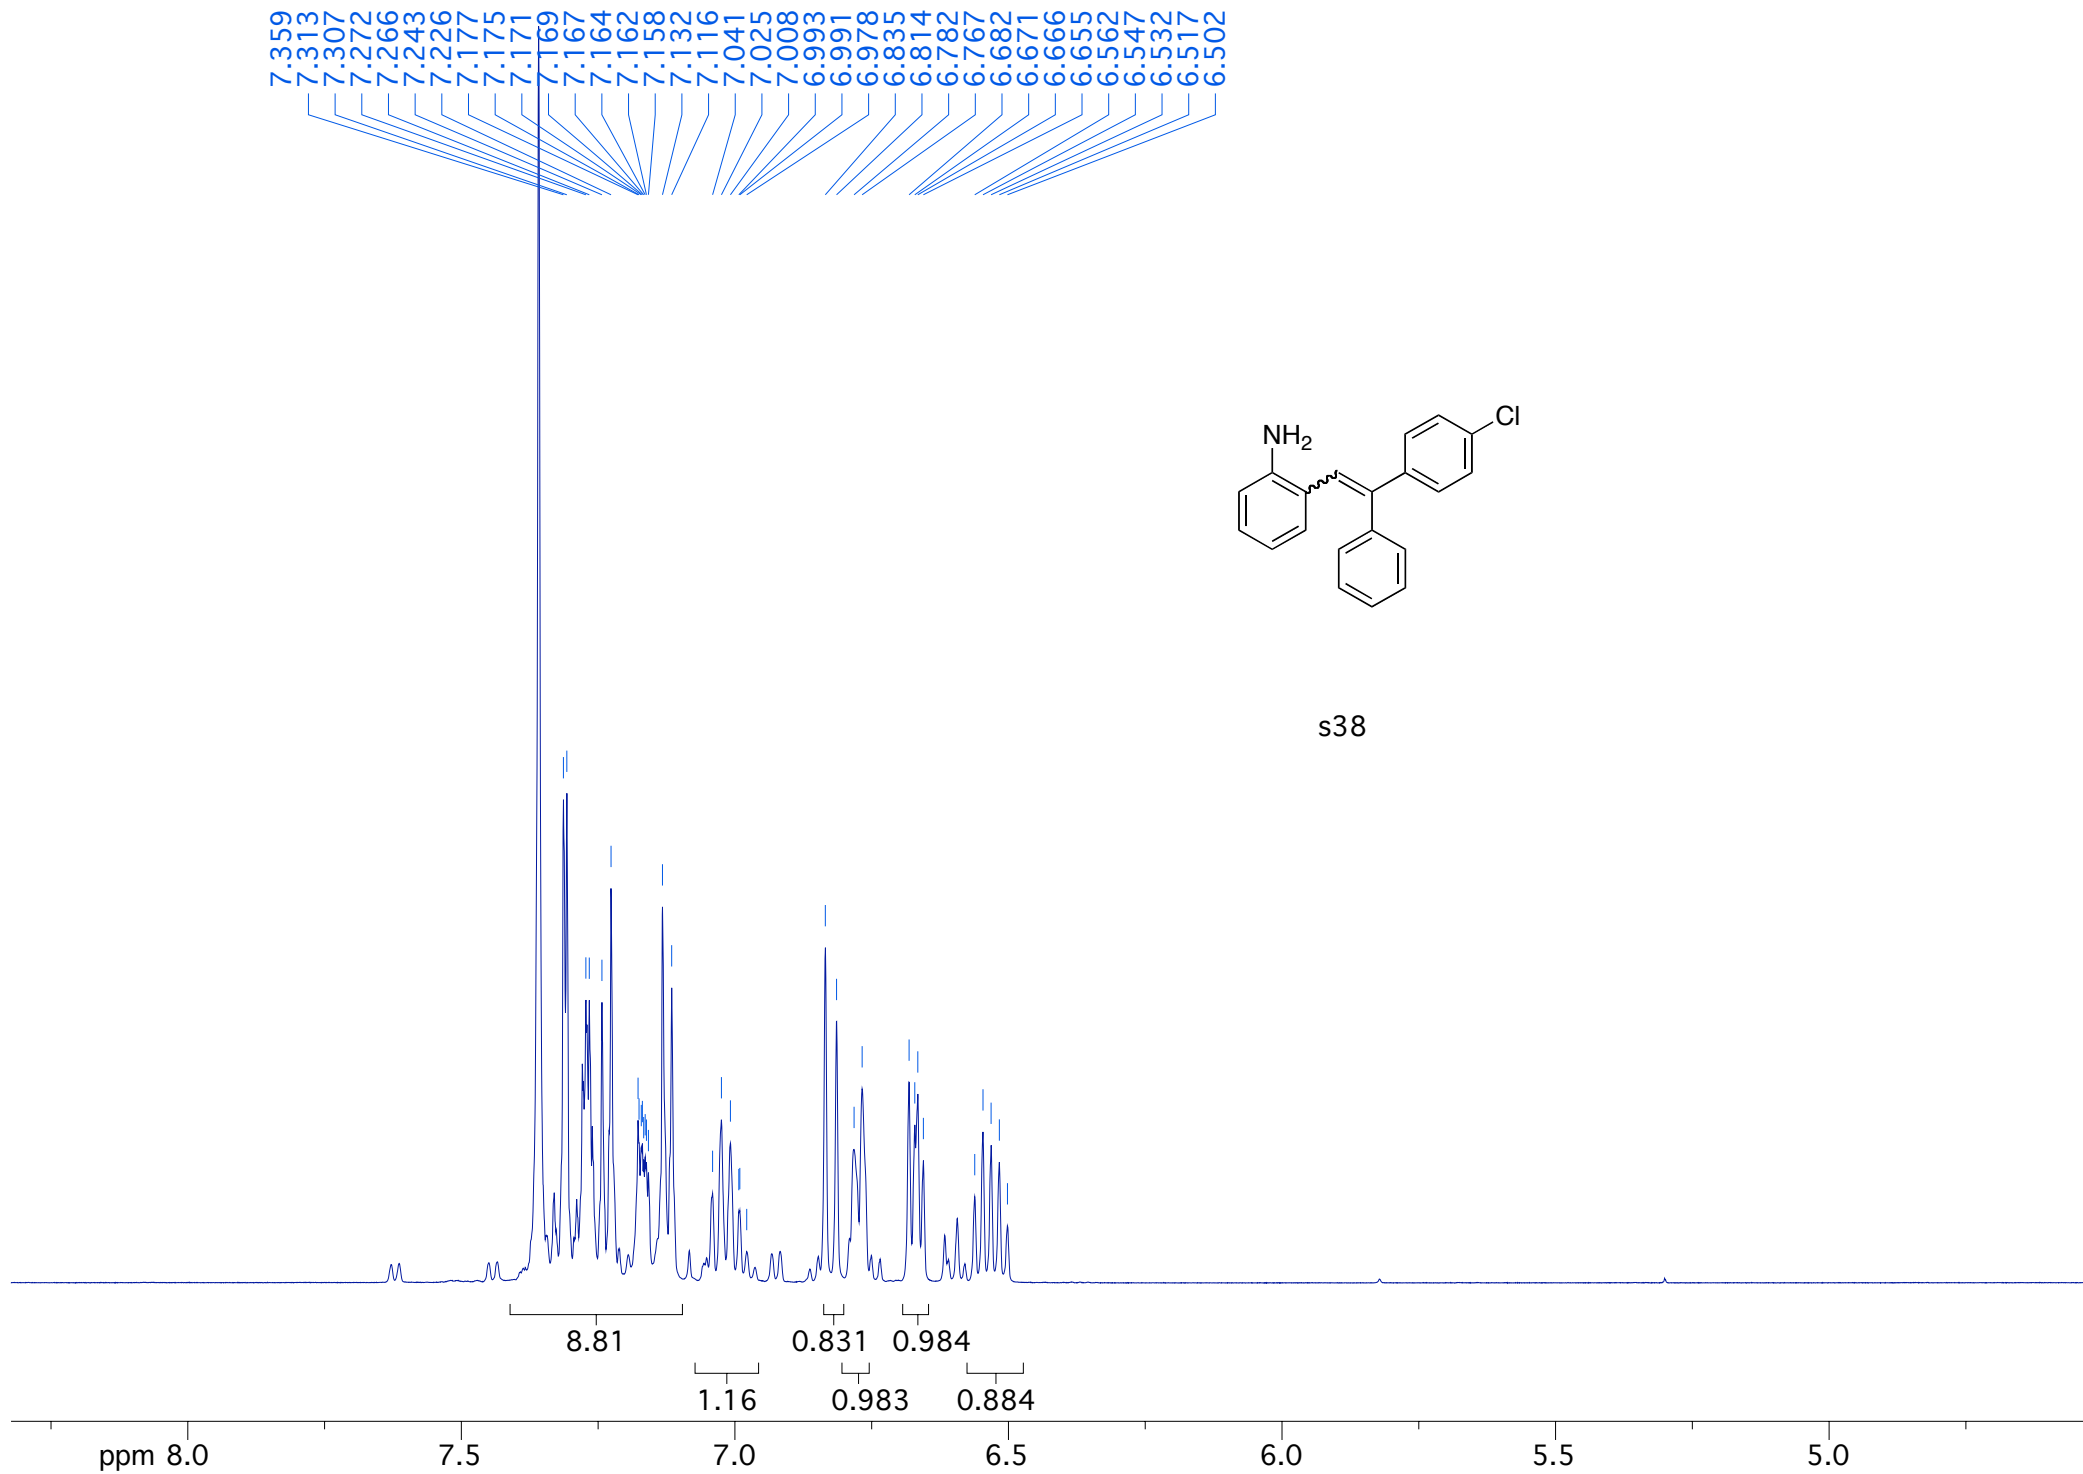

144.743  
144.705  
143.868  
143.016  
142.957  
141.944  
139.622  
138.535  
133.510  
133.232  
131.925  
130.452  
130.352  
130.294  
129.399  
128.521  
128.382  
128.359  
128.295  
128.134  
127.903  
127.649  
124.993  
124.785  
118.336  
118.276  
115.588  
115.545  
77.375  
77.116  
76.864

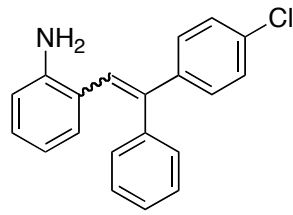

s38

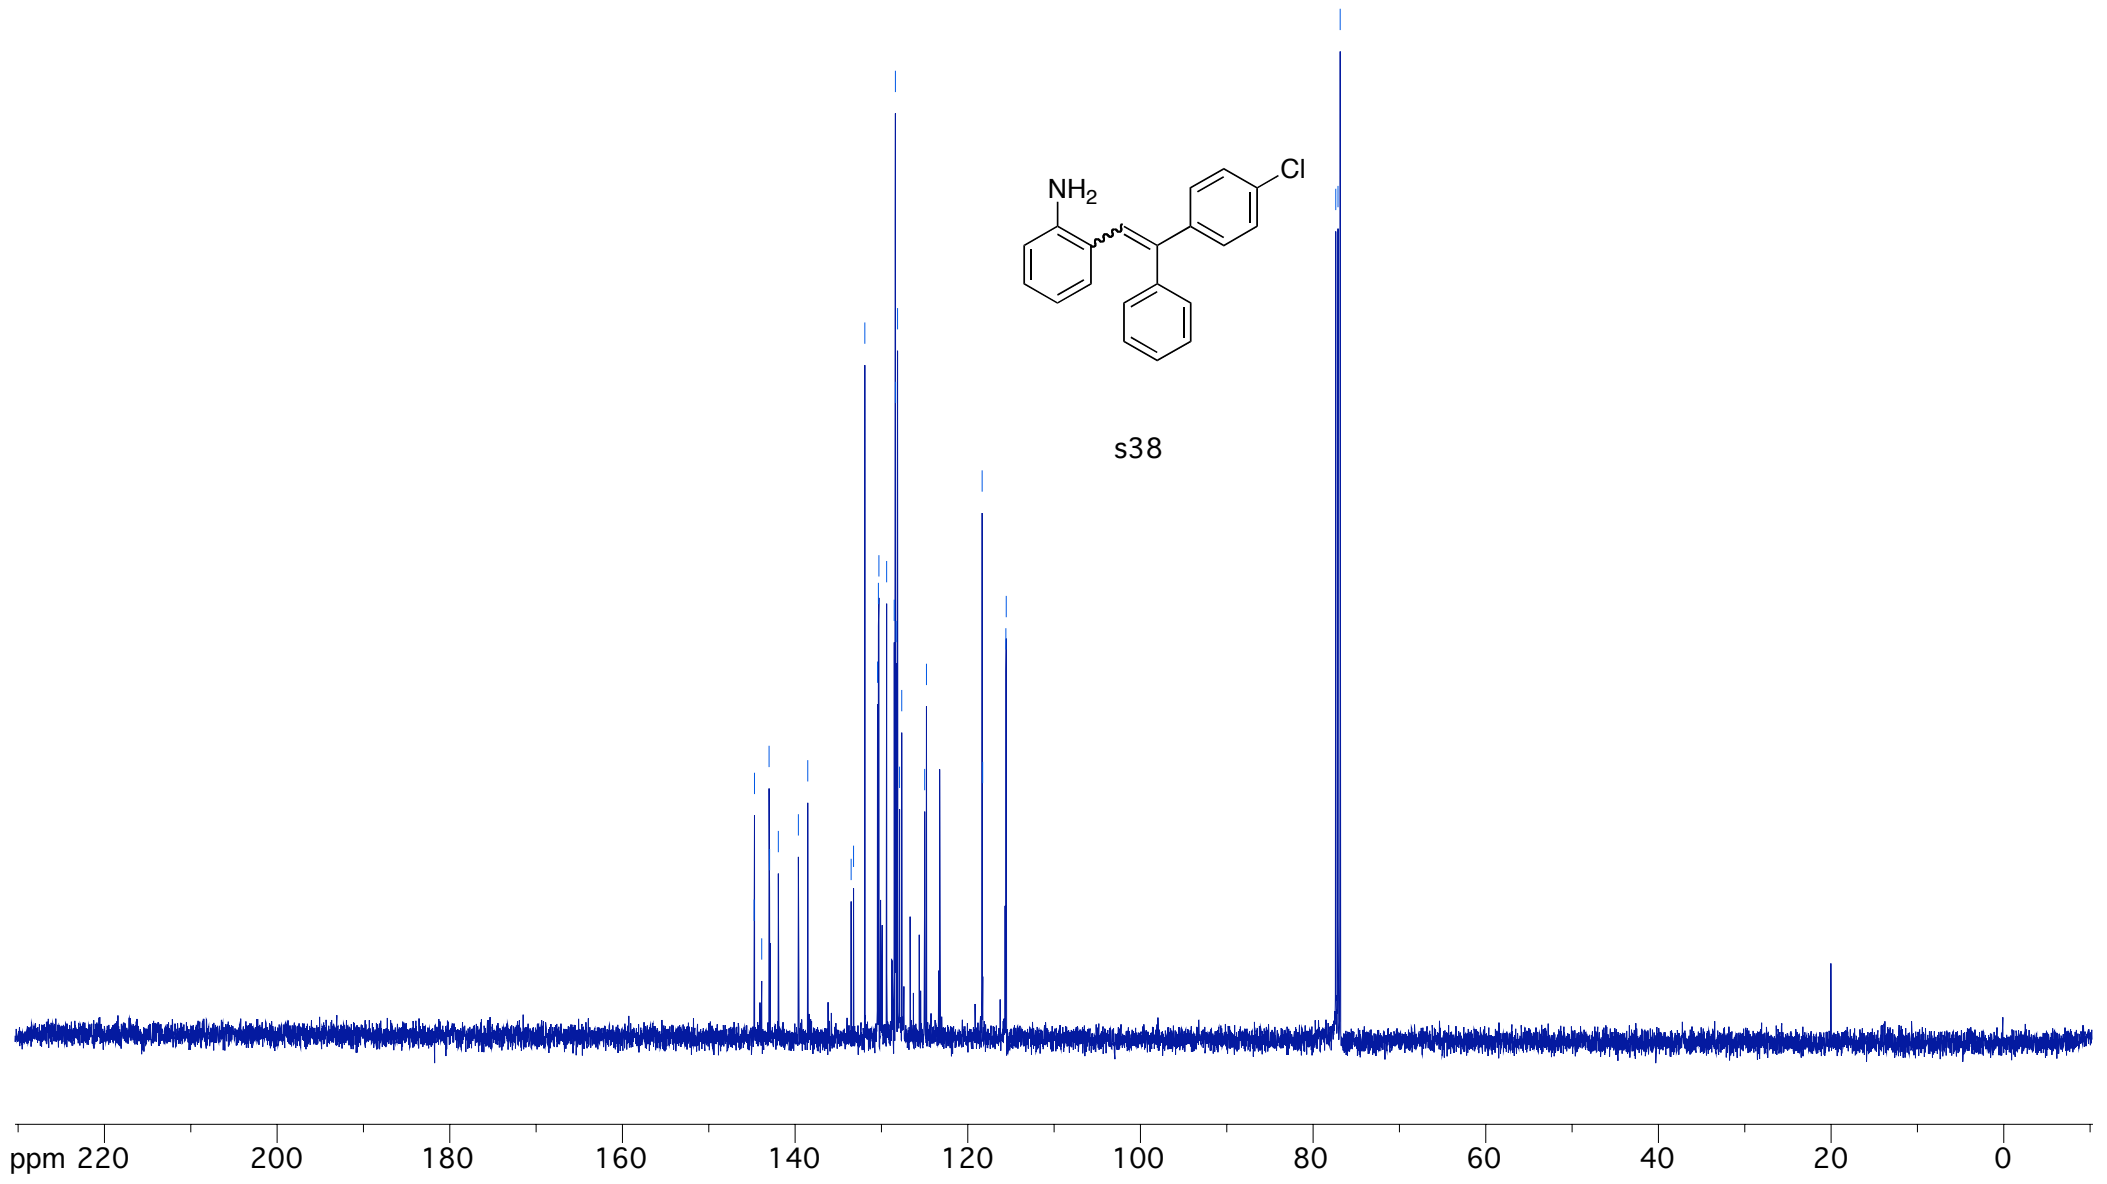

7.366  
7.338  
7.317  
7.310  
7.299  
7.287  
7.276  
7.260  
7.231  
7.231  
7.218  
7.213  
7.206  
7.191  
7.178  
7.173  
7.156  
7.146  
7.131  
7.118  
7.101  
7.036  
7.027  
7.003  
6.965  
6.843  
6.836  
6.814  
6.801  
6.789  
6.758  
6.745

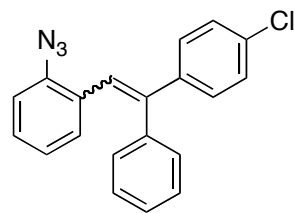

27d

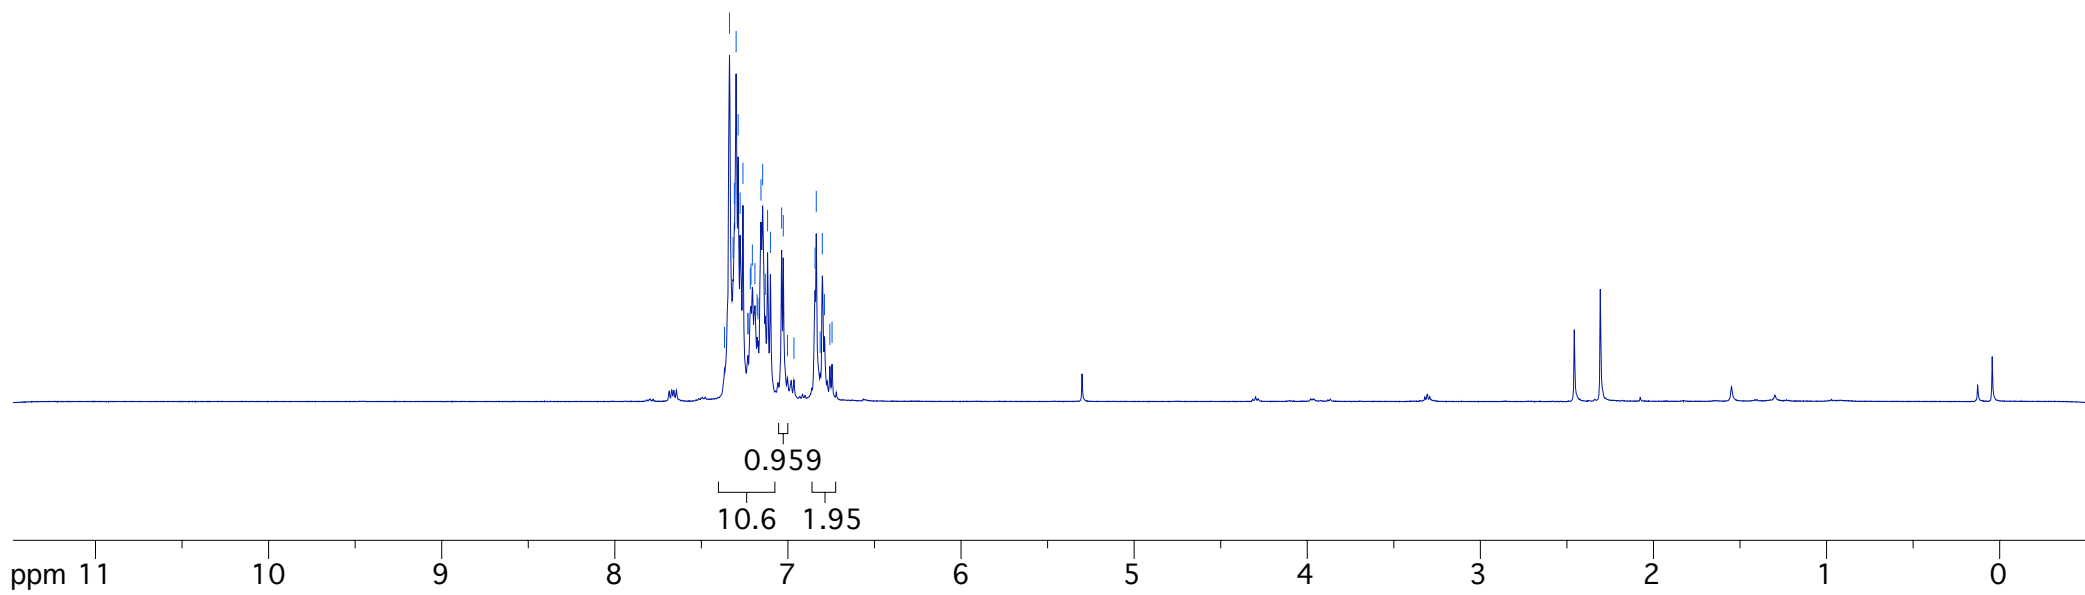

142.988  
142.736  
141.649  
139.575  
138.785  
138.740  
138.513  
133.657  
133.407  
132.027  
130.723  
130.511  
130.411  
130.088  
129.250  
129.172  
128.692  
128.553  
128.413  
128.356  
128.313  
128.267  
128.012  
127.736  
127.356  
126.636  
125.607  
124.242  
124.094  
123.769  
123.403  
118.305  
118.274  
118.175  
77.353  
77.099  
76.848

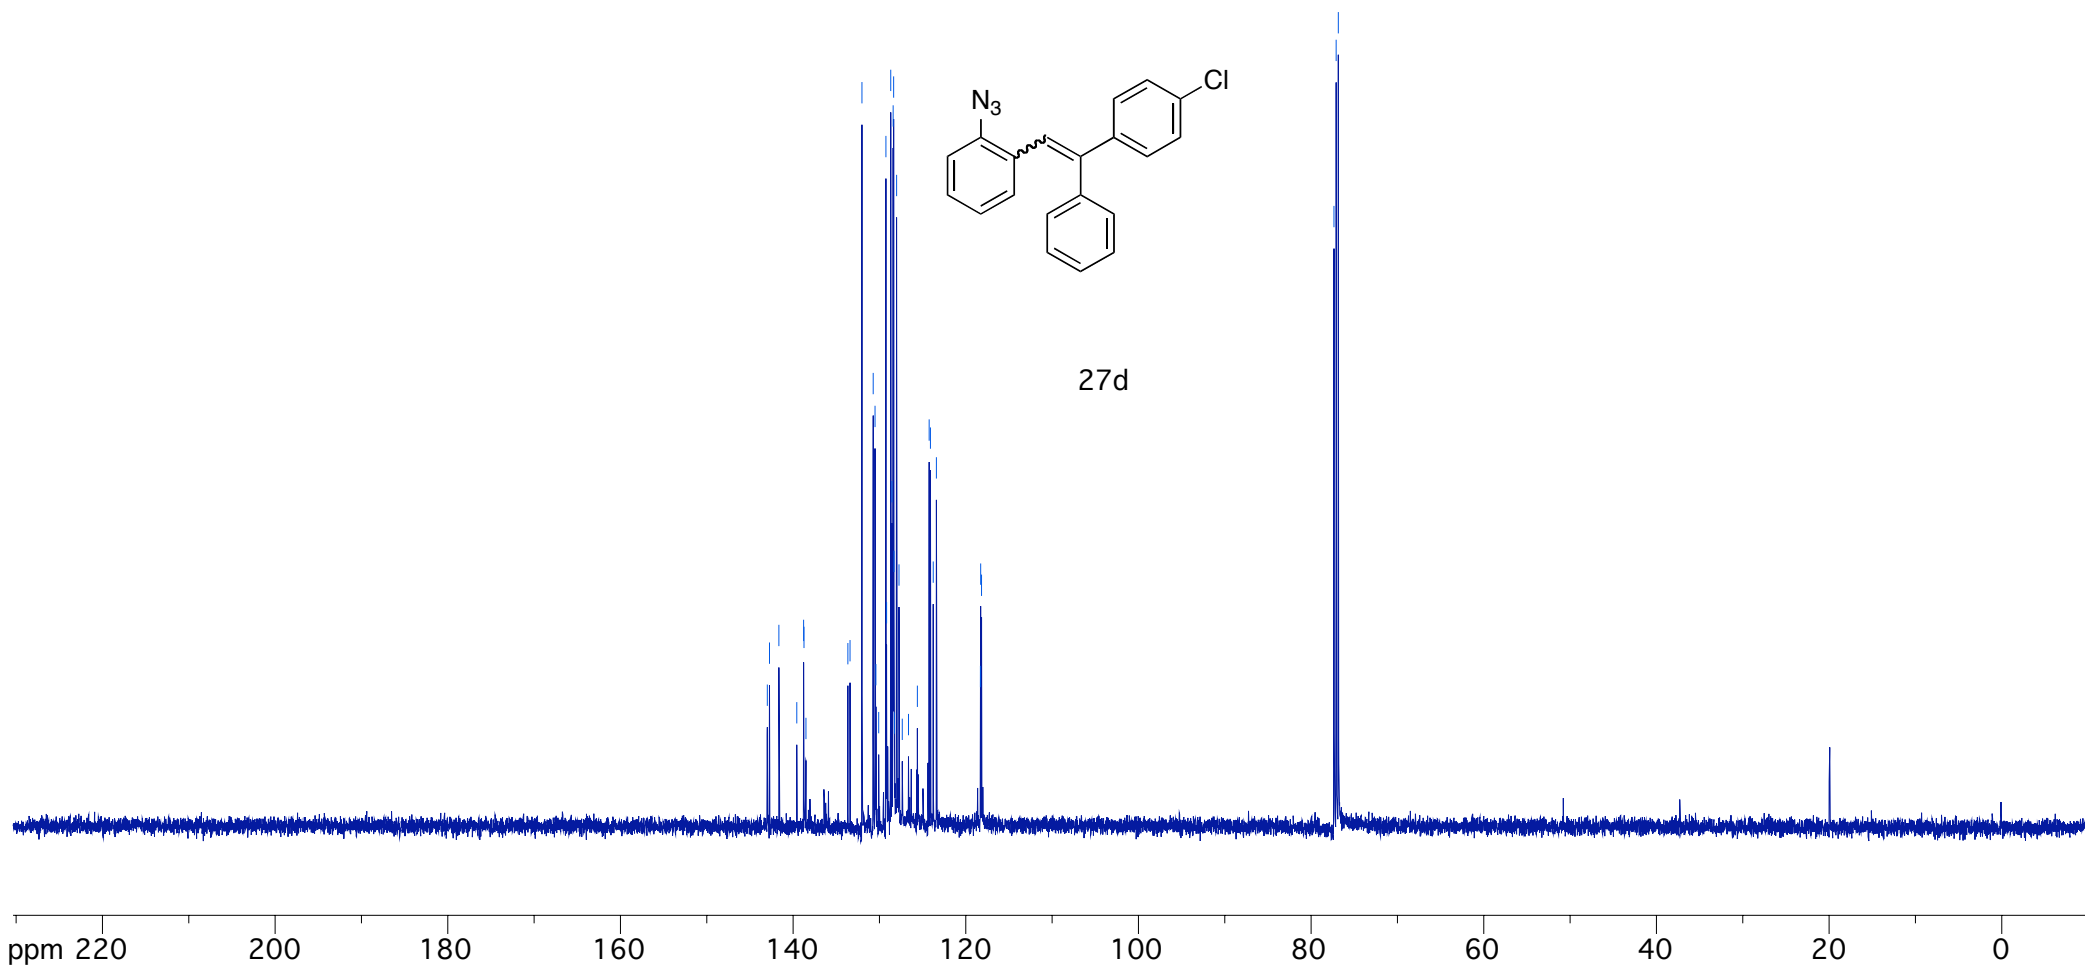

7.699  
7.682  
7.614  
7.598  
7.580  
7.563  
7.454  
7.426  
7.410  
7.374  
7.368  
7.299  
7.291  
7.123  
7.108  
7.093  
7.021  
7.005  
6.927  
6.911  
6.848  
6.833  
6.752  
6.745  
6.736  
6.729  
6.631  
6.616  
6.601

3.826

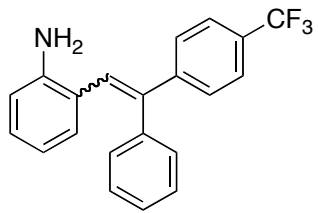

s40

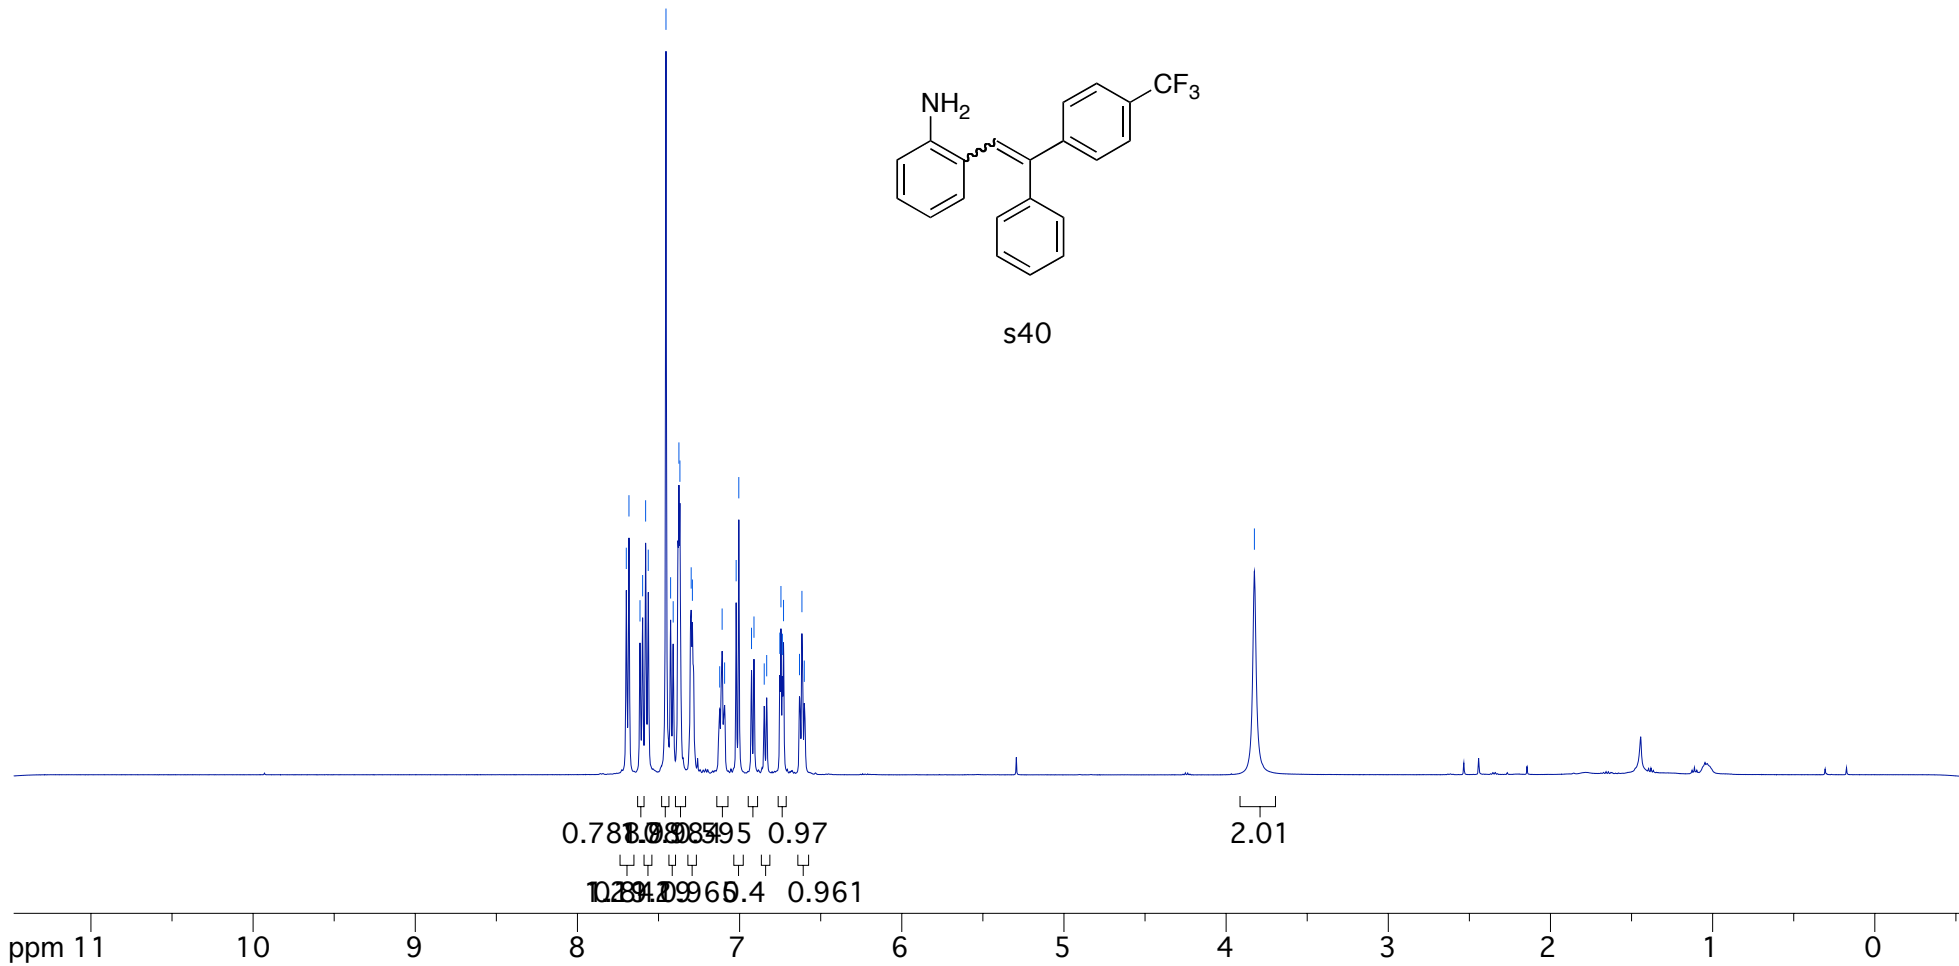

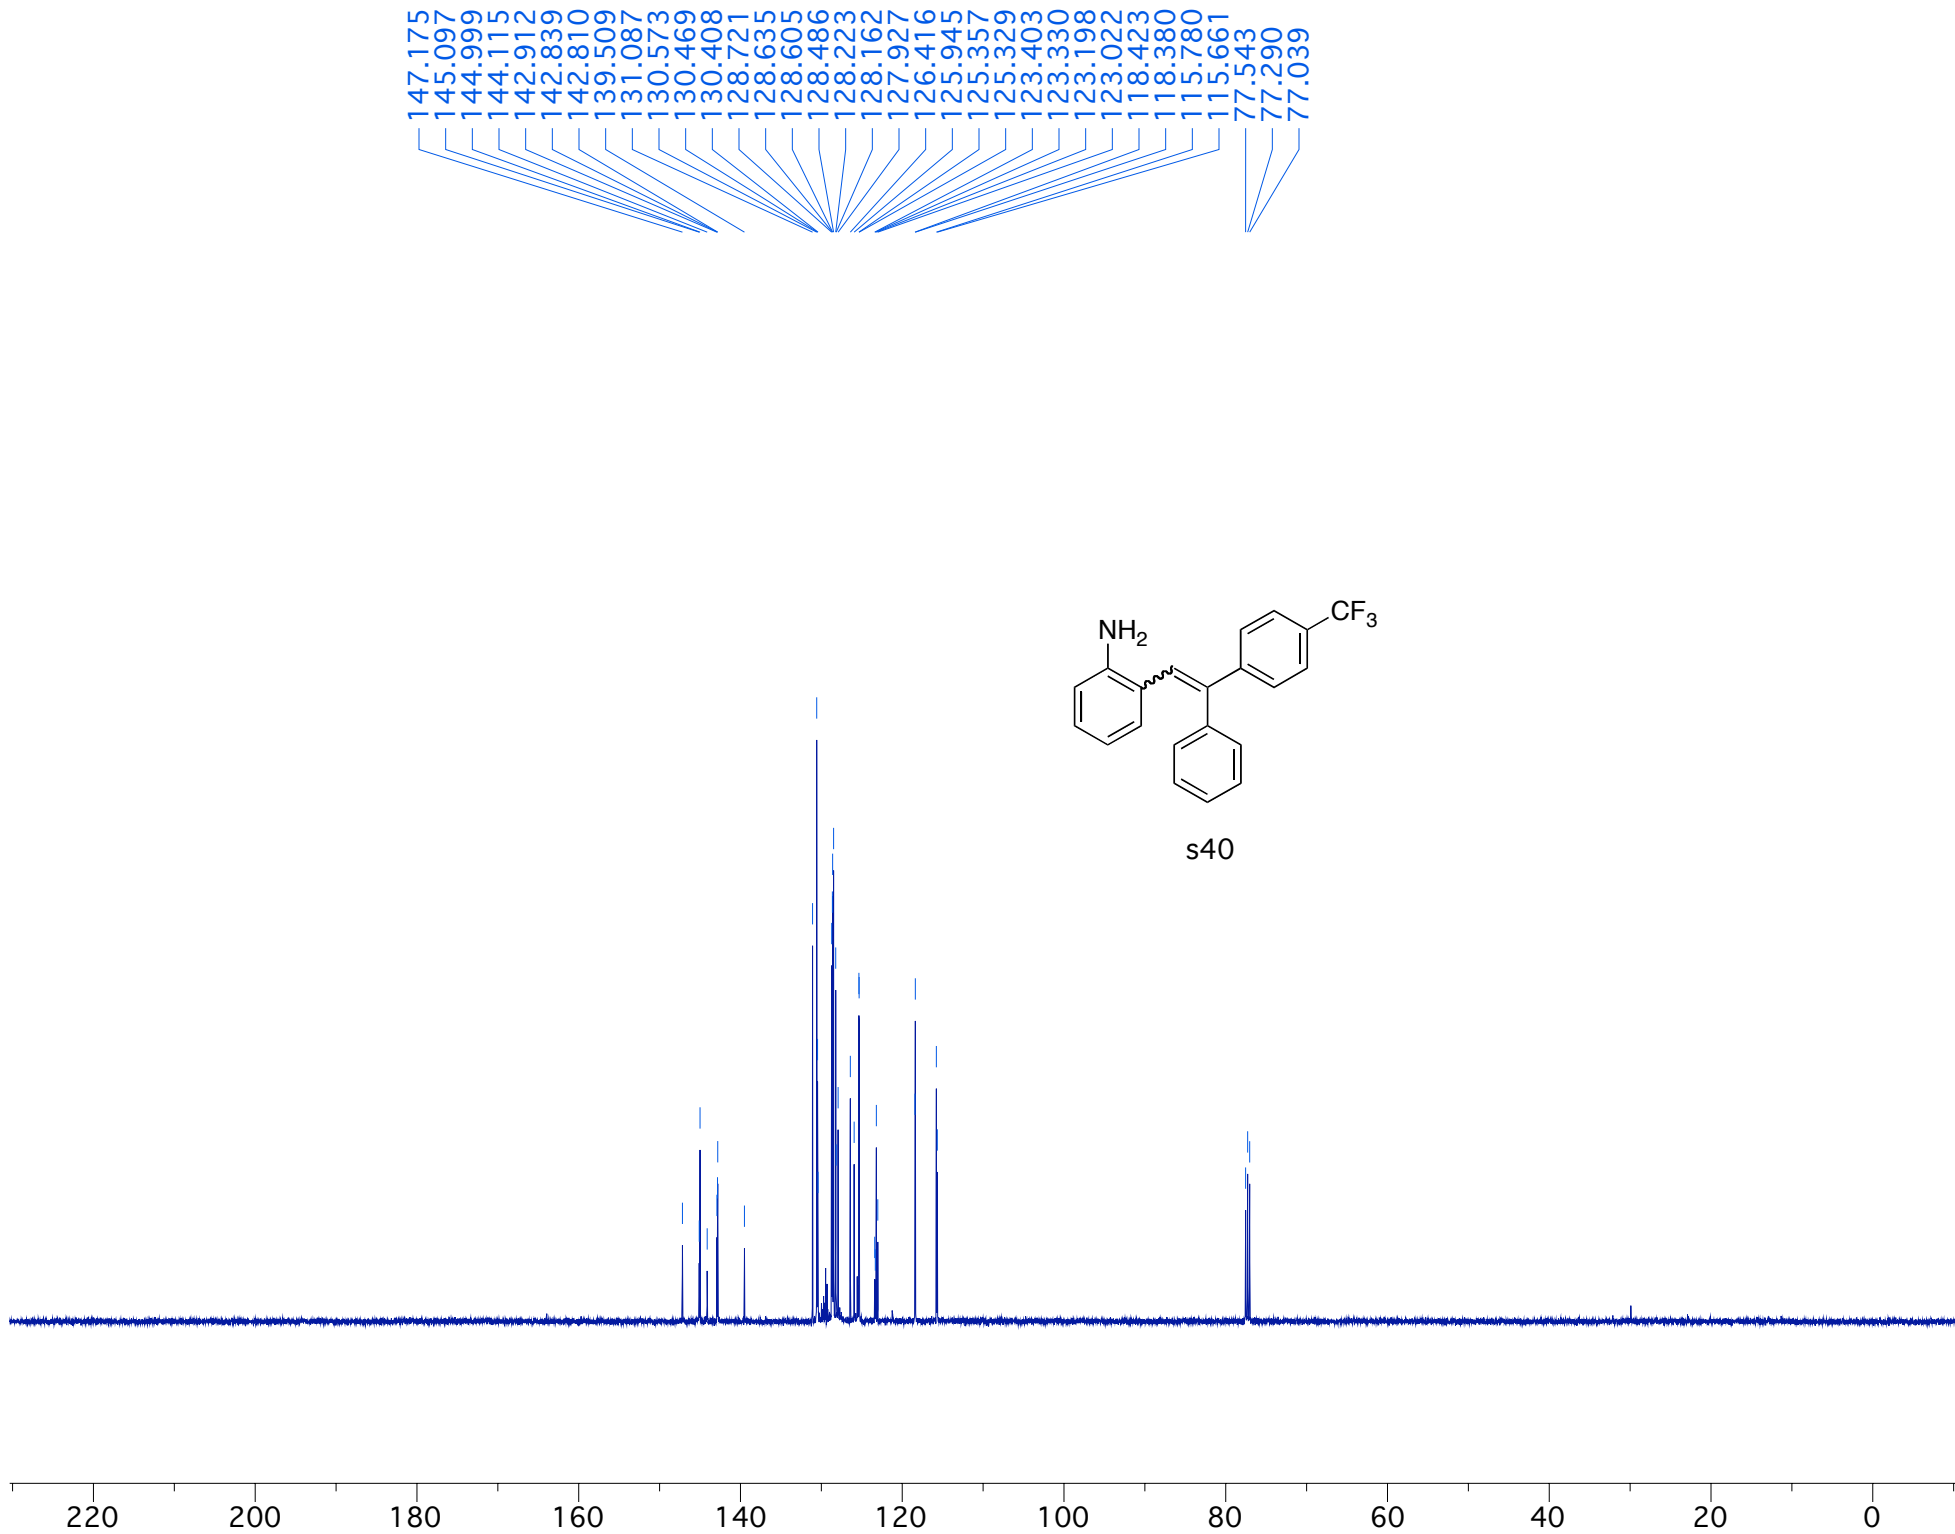

7.593  
7.577  
7.551  
7.535  
7.457  
7.441  
7.357  
7.343  
7.313  
7.281  
7.260  
7.232  
7.154  
7.147  
7.145  
7.138  
7.096  
6.813  
6.798  
6.774

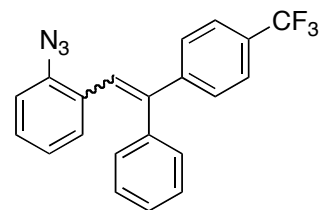

27e

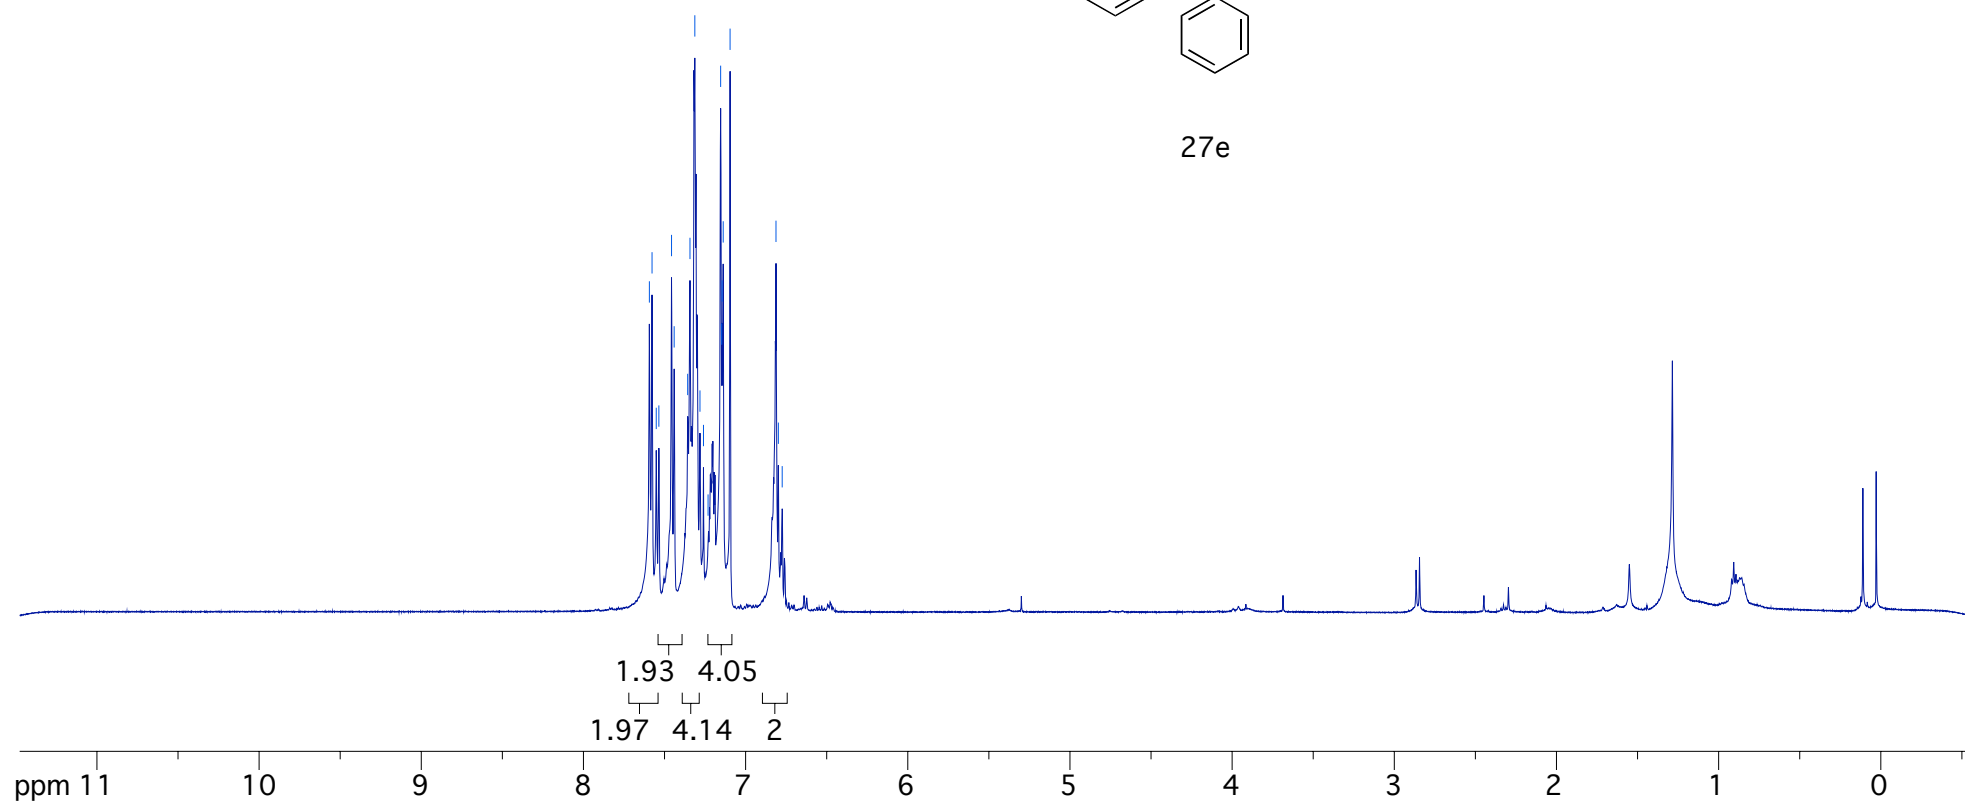

146.689  
143.955  
142.822  
142.390  
139.284  
138.888  
131.000  
130.707  
130.456  
128.851  
128.635  
128.588  
128.415  
128.184  
128.115  
127.973  
127.858  
125.353  
125.314  
125.286  
125.211  
125.183  
124.900  
124.536  
124.257  
124.110  
118.293  
118.191  
77.318  
77.062  
76.807

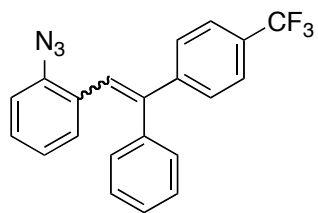

27e

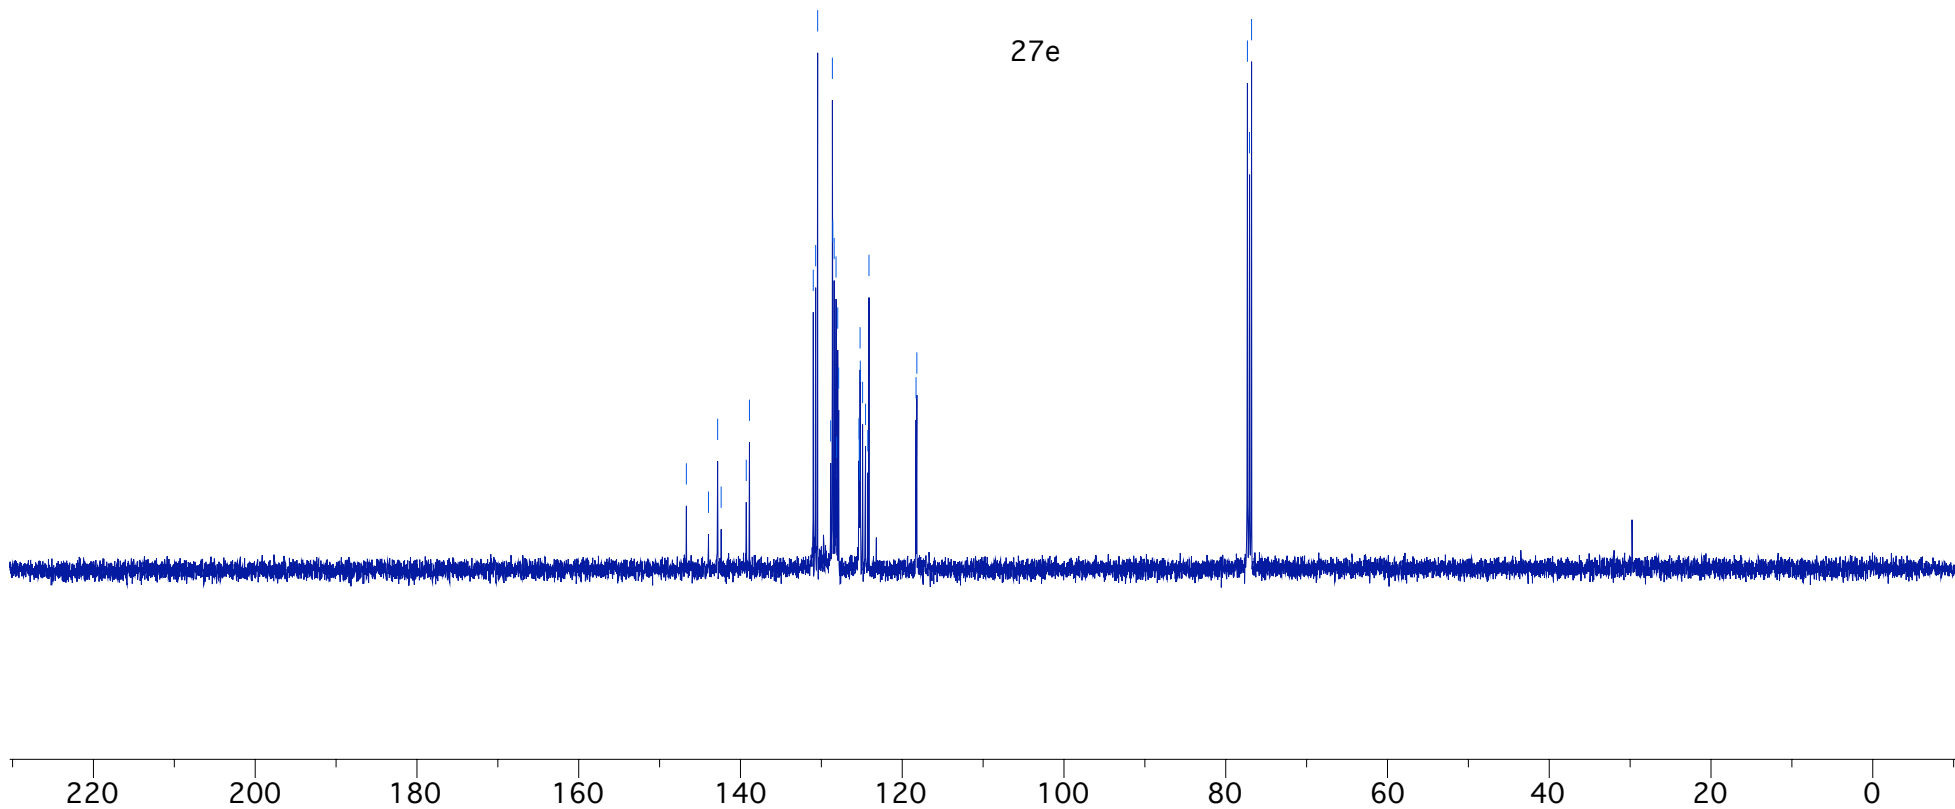



8.179  
7.767  
7.751  
7.479  
7.465  
7.438  
7.423  
7.410  
7.404  
7.356  
7.341  
7.330  
7.316  
7.286  
7.272  
7.258  
7.201  
7.187  
7.172

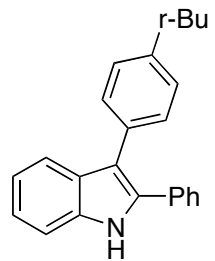

28b

1.409

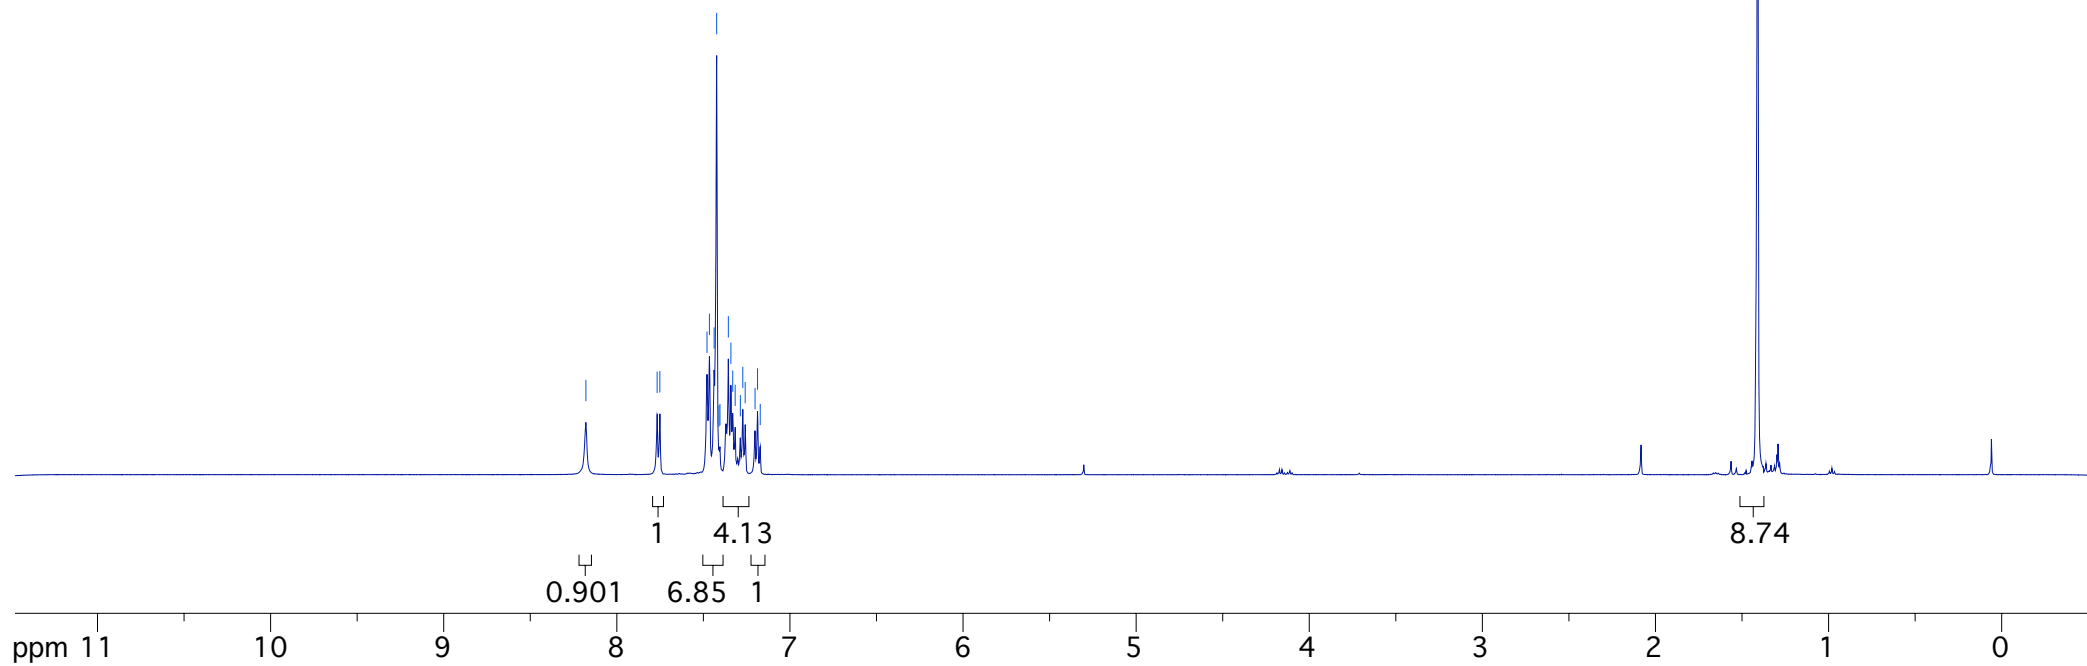

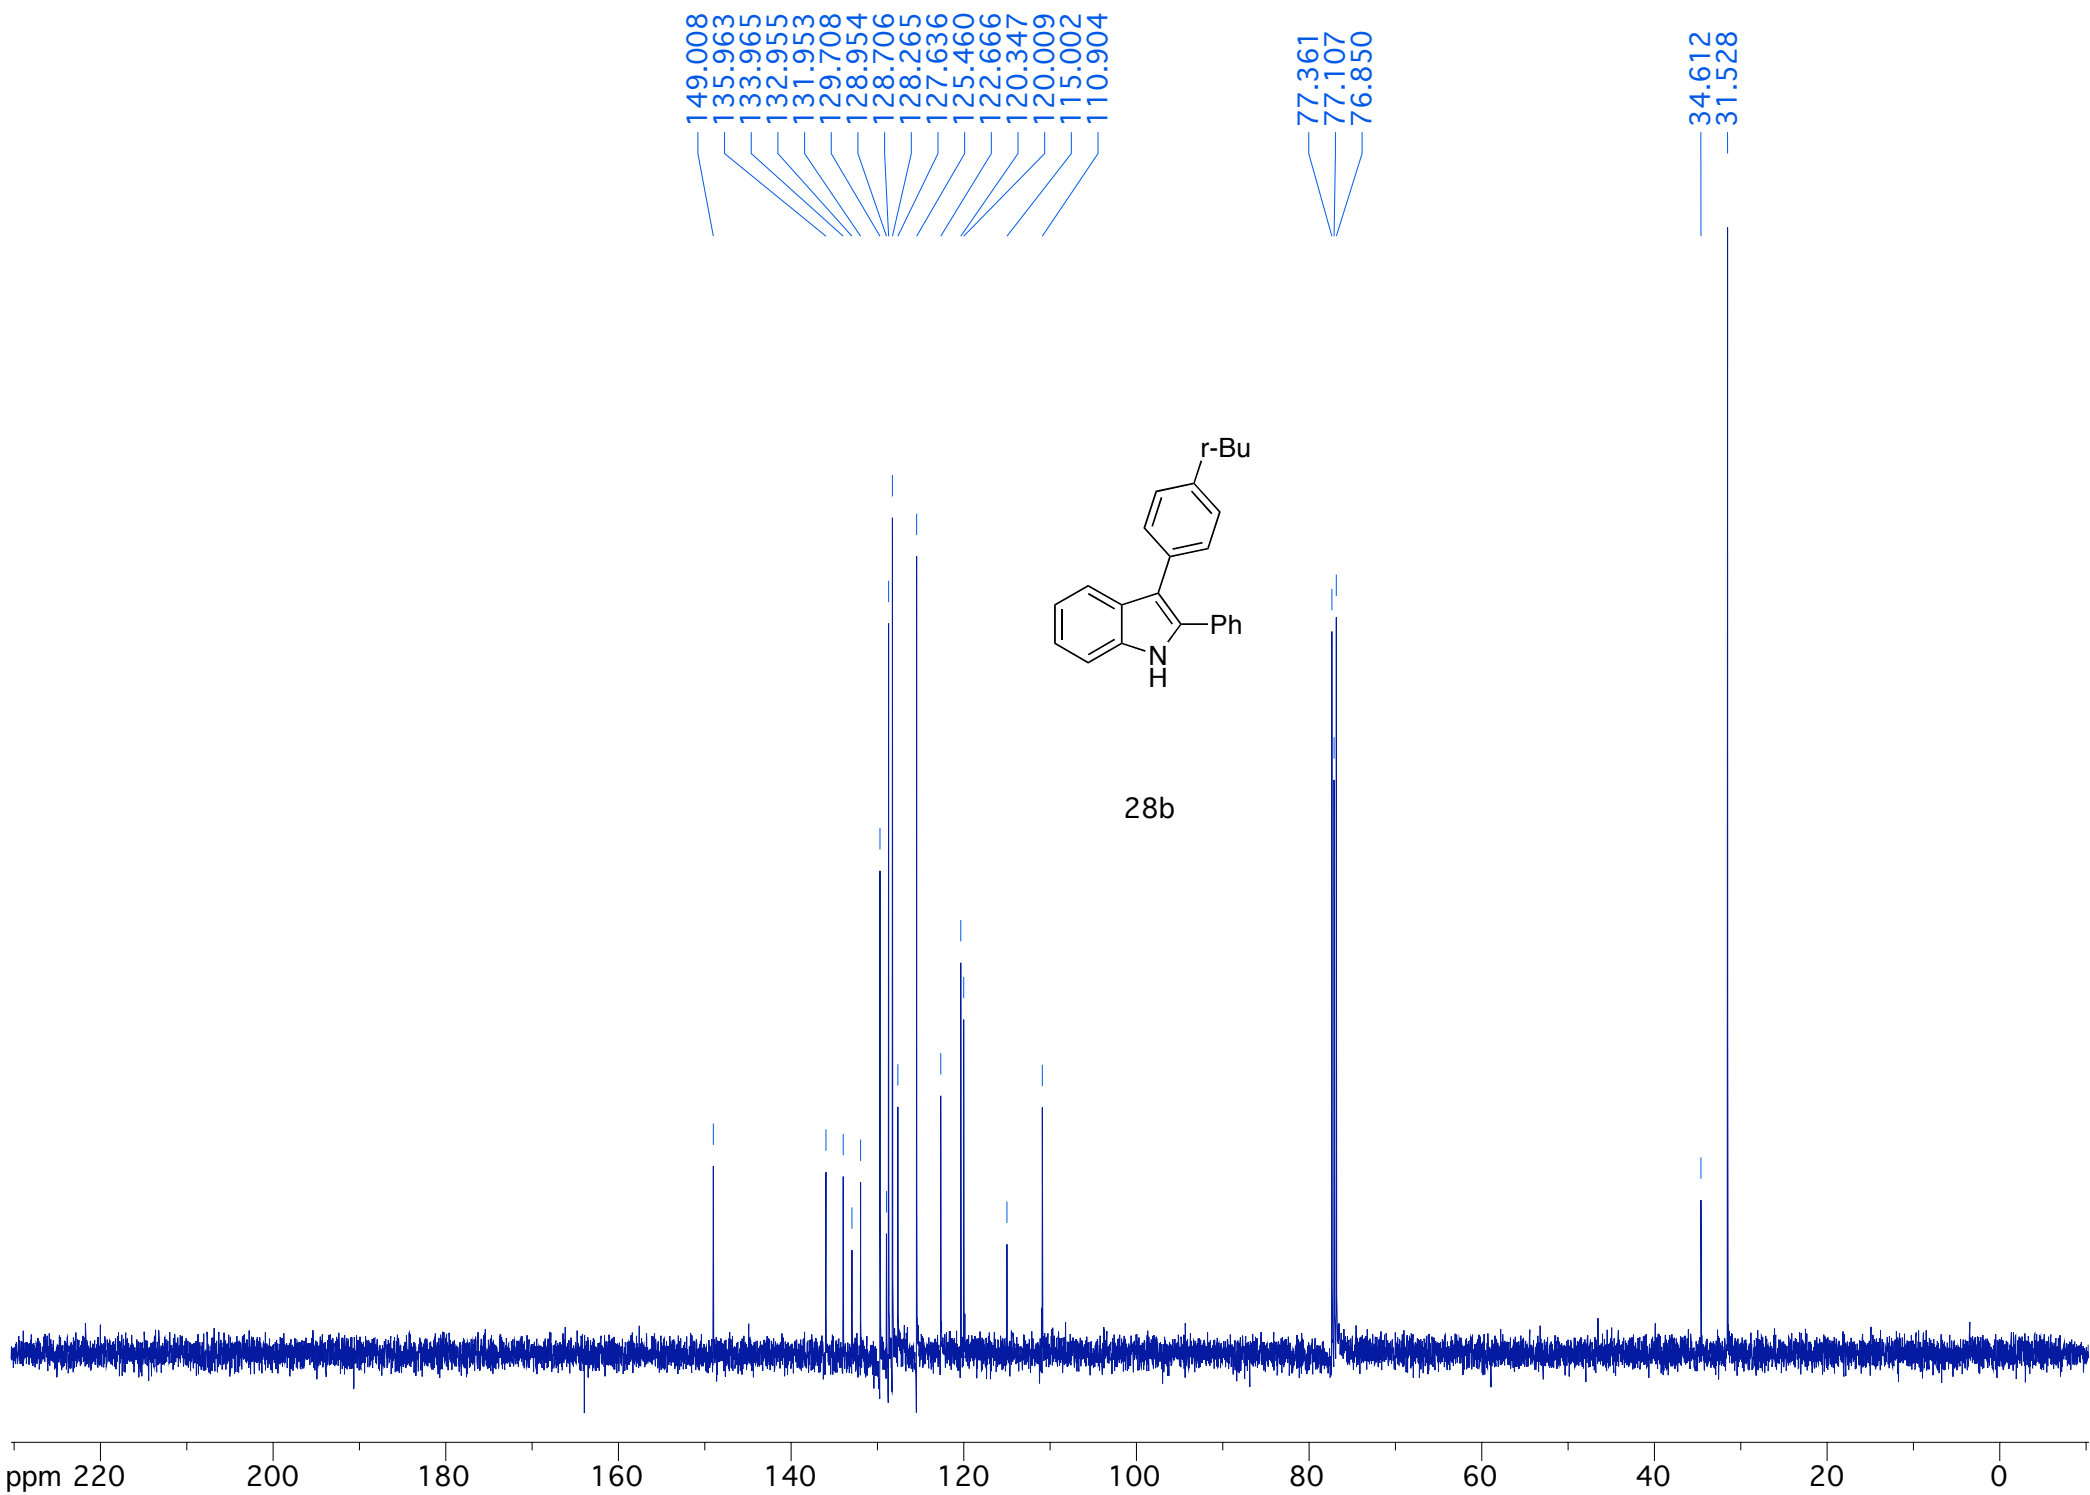

8.246  
7.787  
7.772  
7.698  
7.682  
7.657  
7.641  
7.553  
7.538  
7.503  
7.502  
7.495  
7.493  
7.487  
7.479  
7.465  
7.449  
7.385  
7.370  
7.354  
7.343  
7.343  
7.341  
7.328  
7.315  
7.303  
7.288  
7.273  
7.262  
7.259  
7.222  
7.206  
7.192

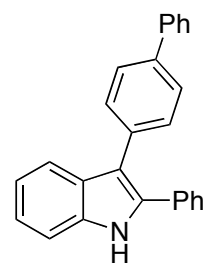

28c

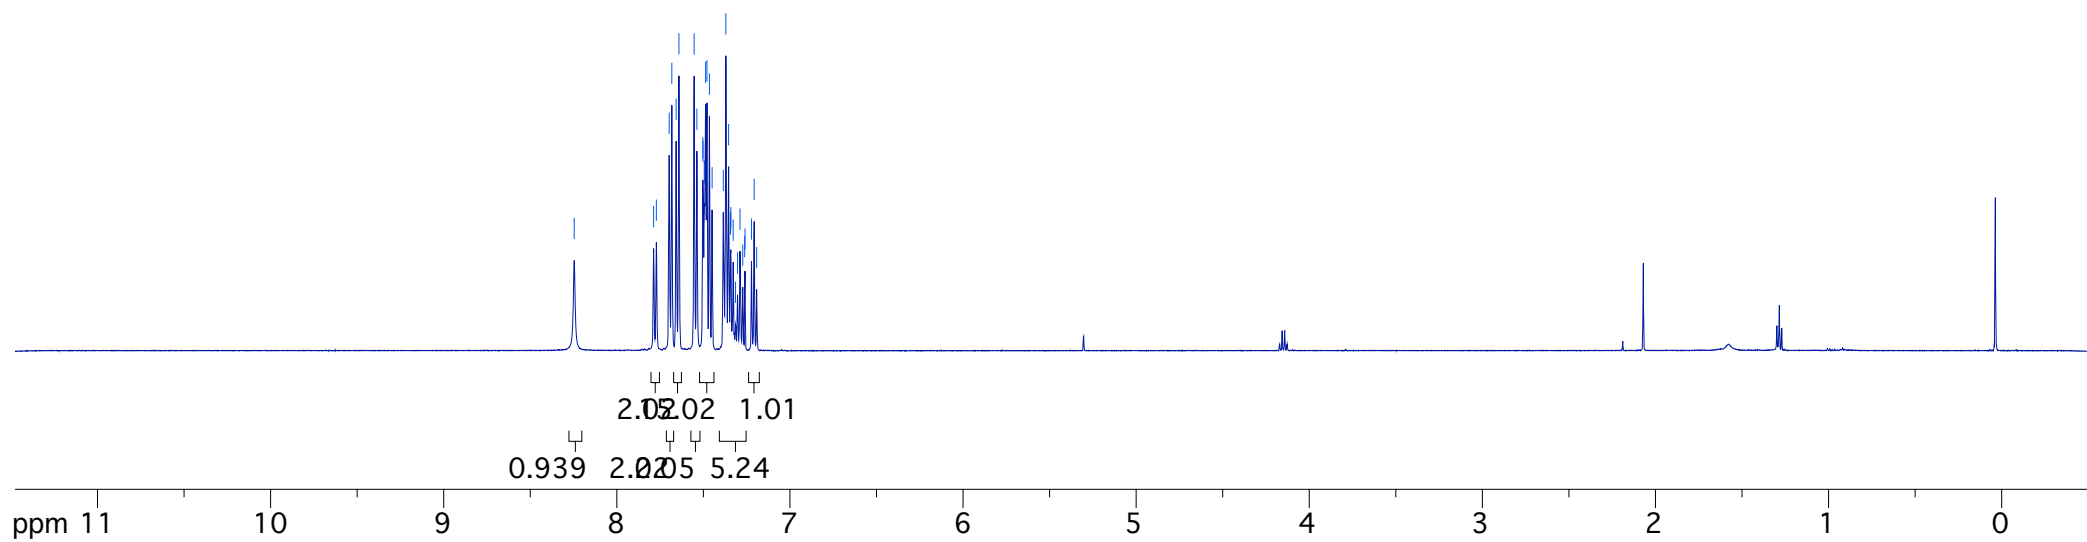

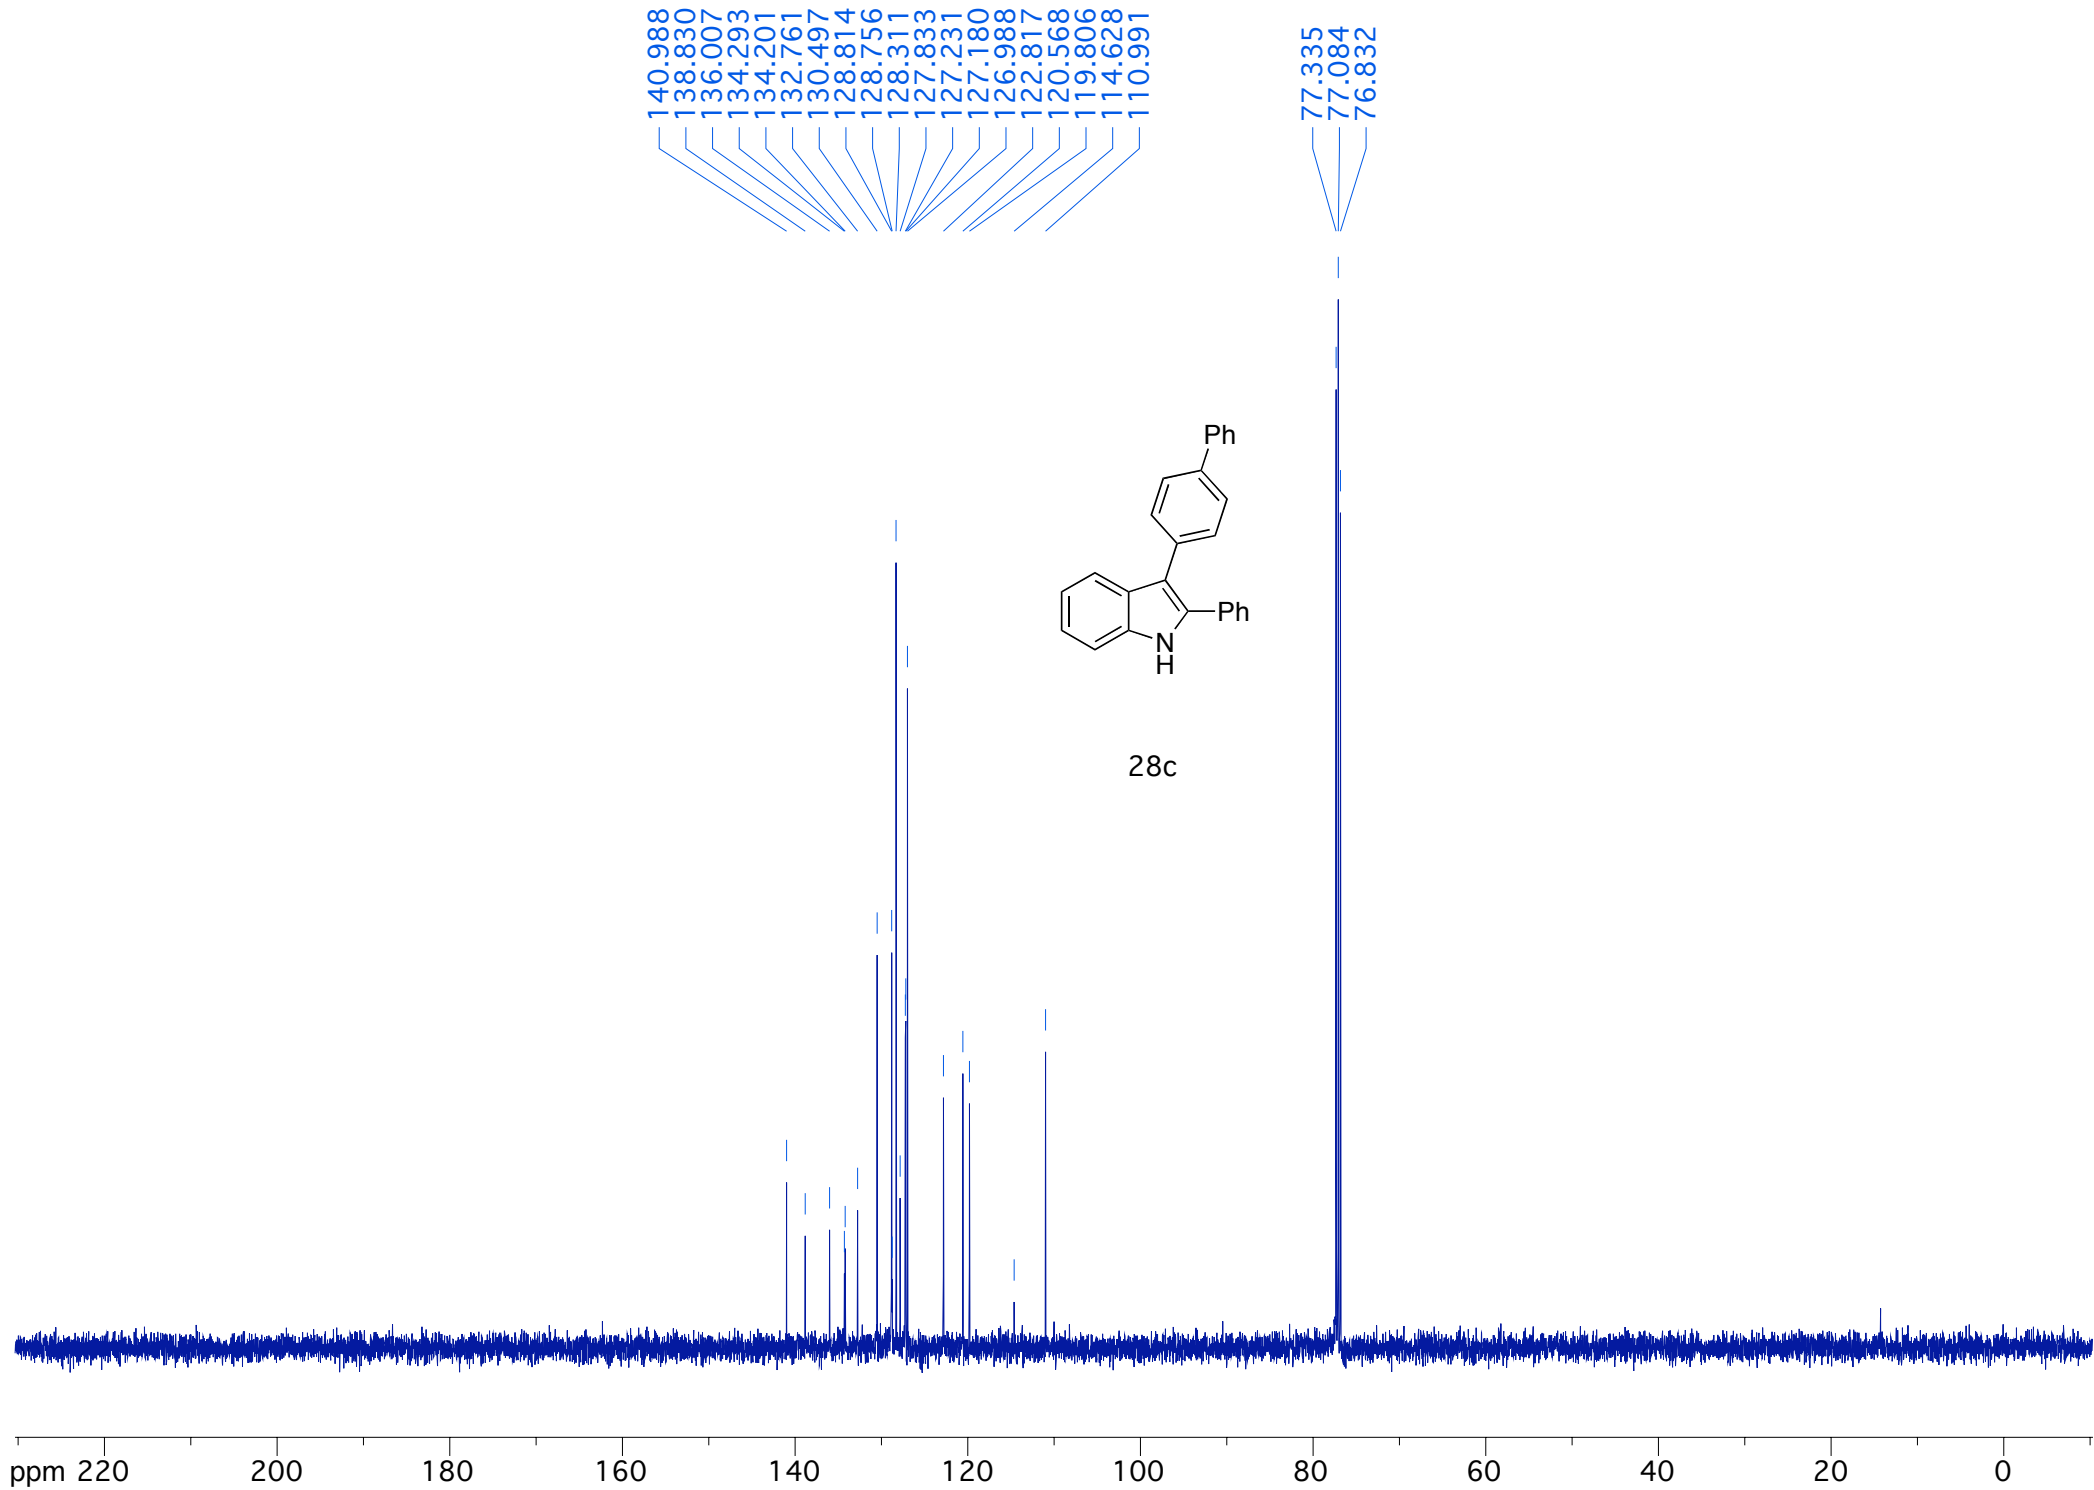

8.232  
7.694  
7.678  
7.447  
7.438  
7.431  
7.421  
7.420  
7.408  
7.404  
7.391  
7.383  
7.373  
7.367  
7.358  
7.343  
7.308  
7.307  
7.293  
7.278  
7.260  
7.225  
7.209  
7.195

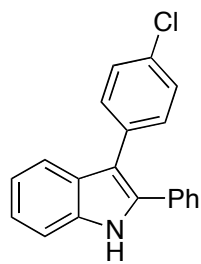

28d

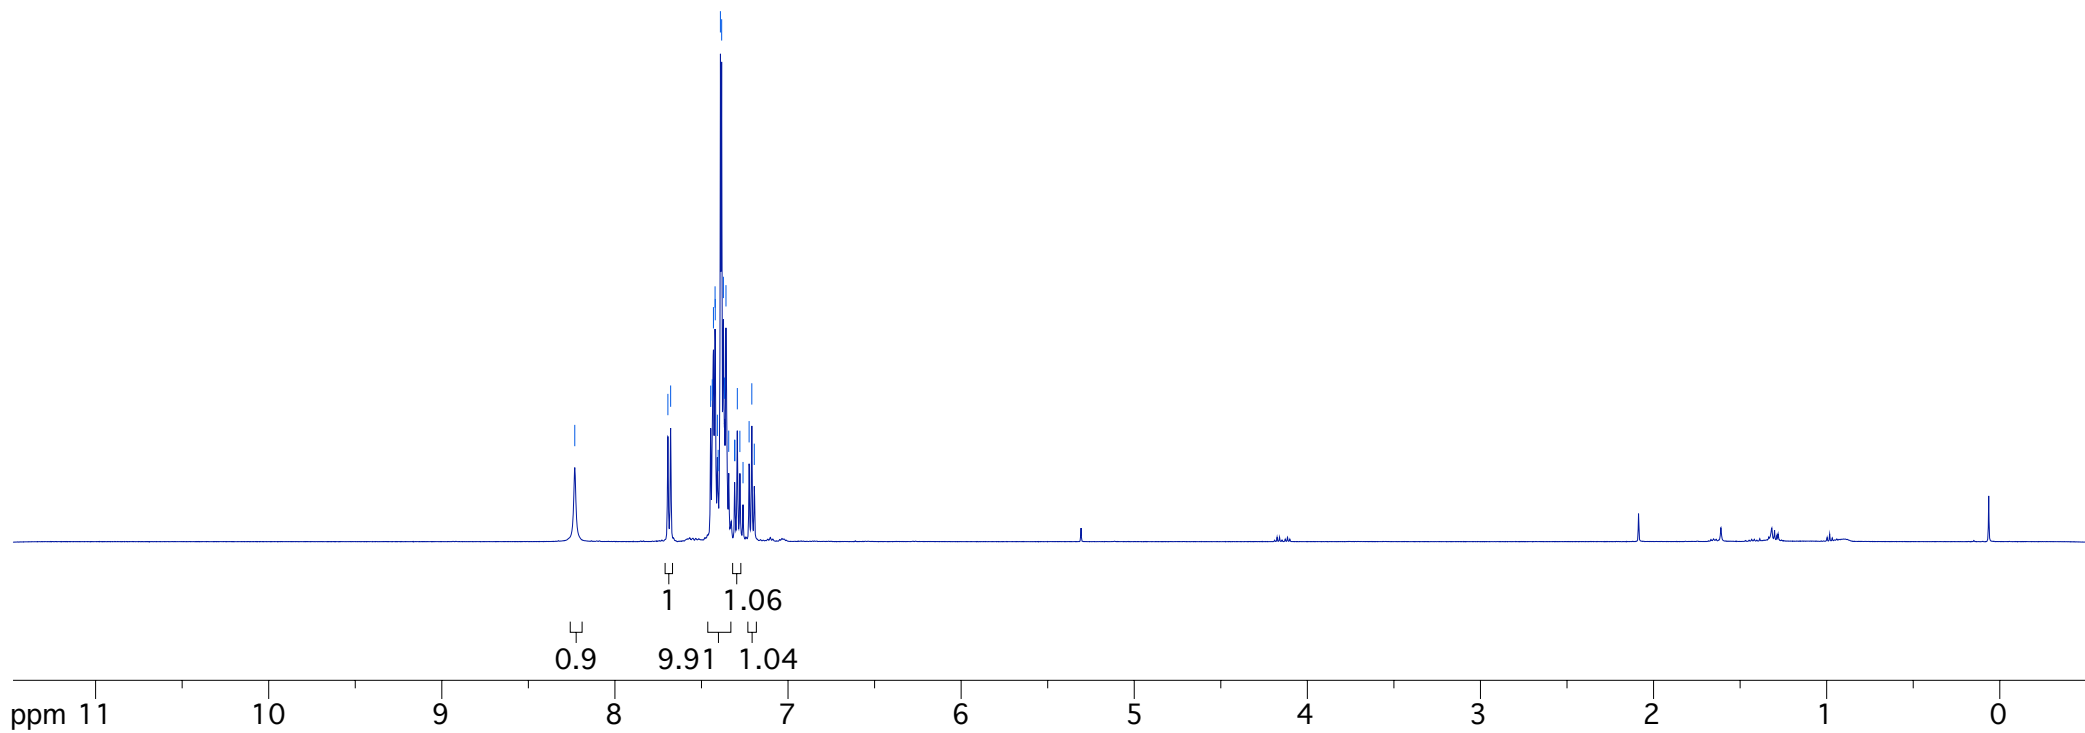

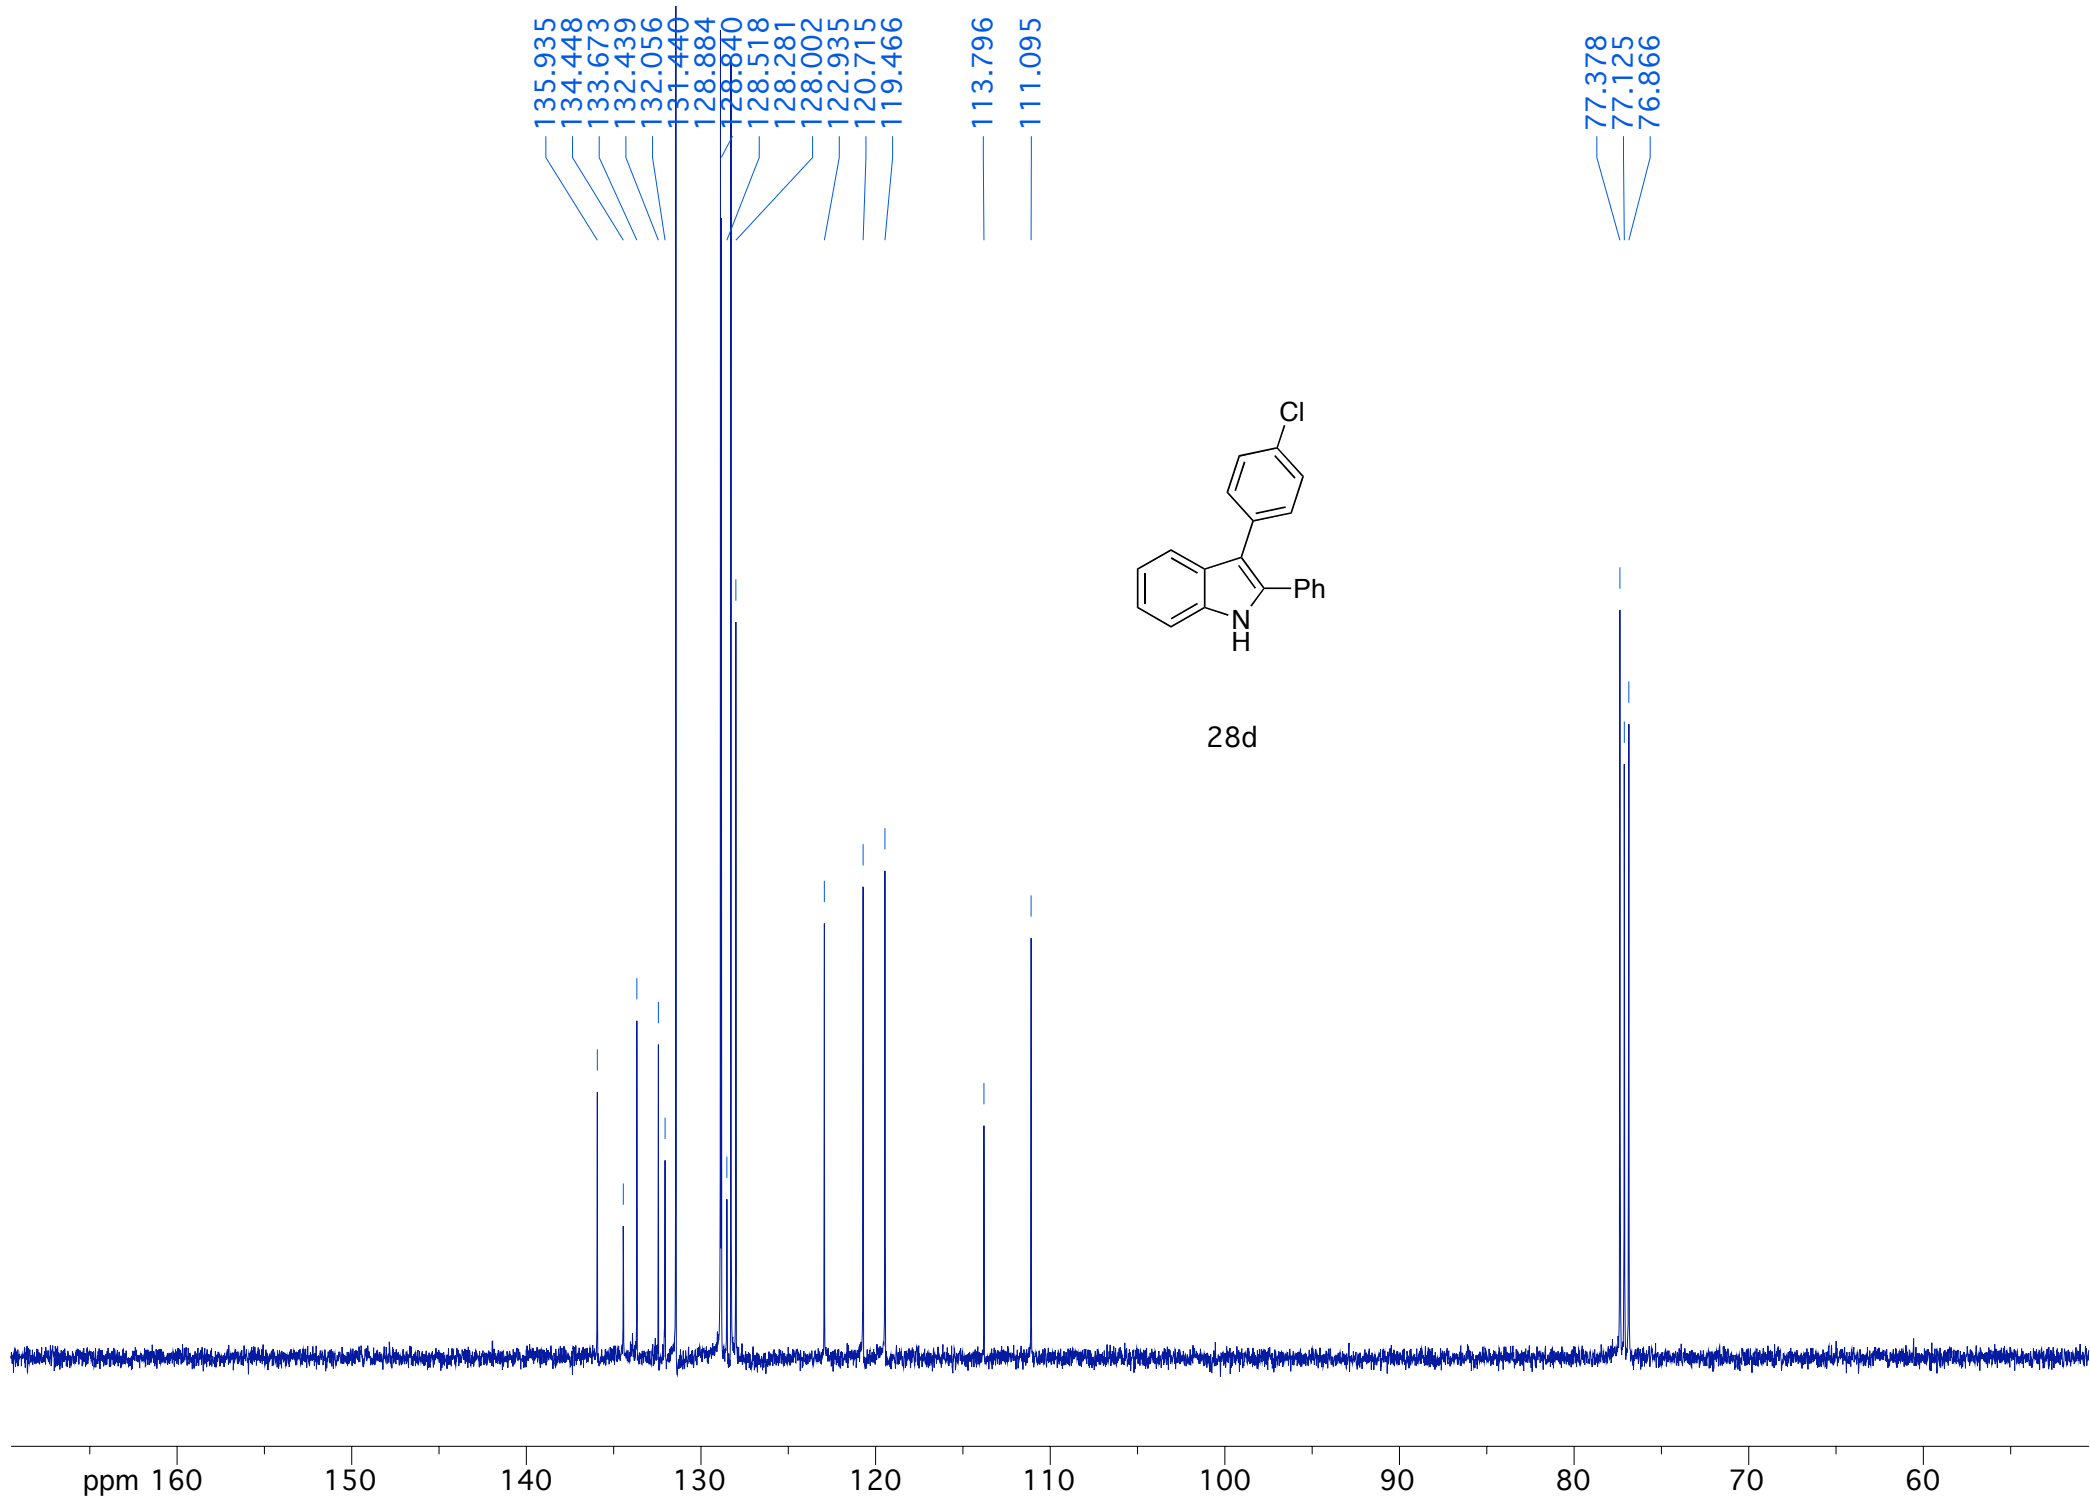

8.293  
7.720  
7.704  
7.653  
7.637  
7.577  
7.561  
7.468  
7.466  
7.451  
7.450  
7.434  
7.430  
7.428  
7.426  
7.421  
7.418  
7.414  
7.395  
7.385  
7.384  
7.381  
7.373  
7.370  
7.367  
7.359  
7.319  
7.317  
7.305  
7.303  
7.301  
7.289  
7.287  
7.260  
7.236  
7.234  
7.222  
7.220  
7.218  
7.206  
7.204

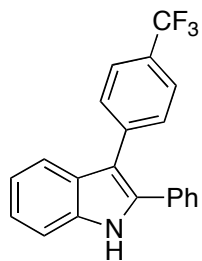

28e

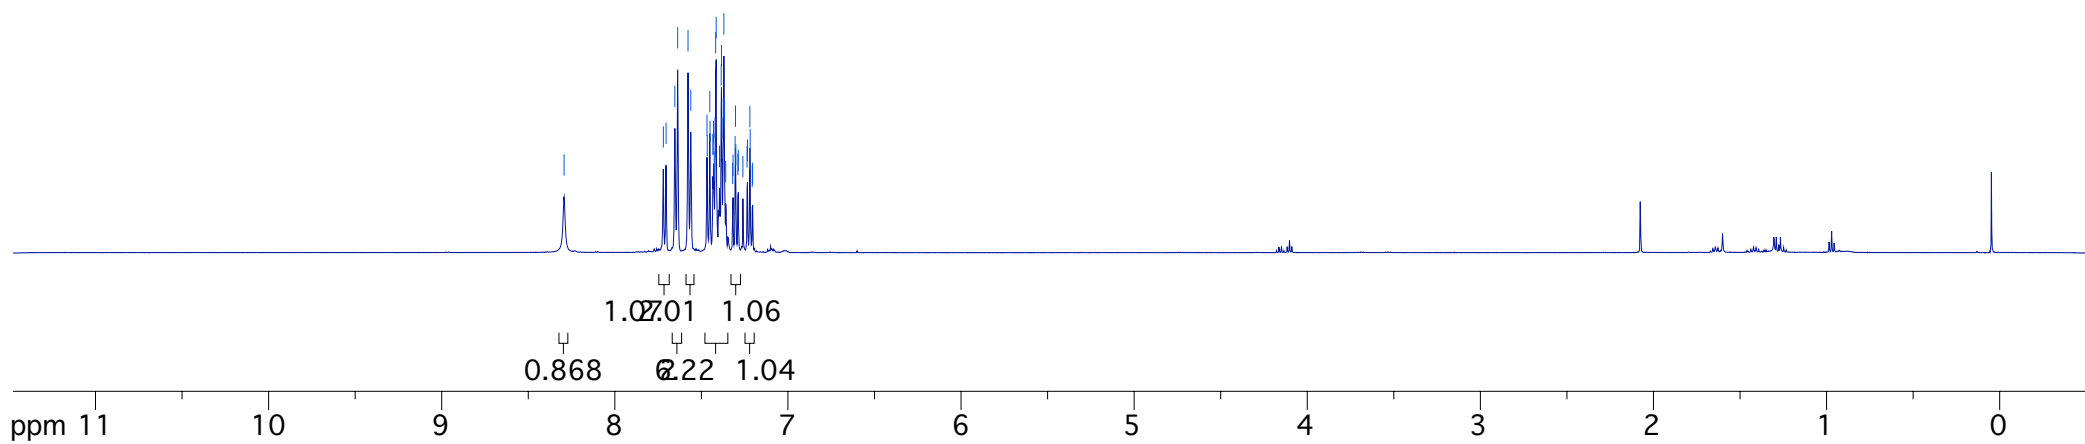

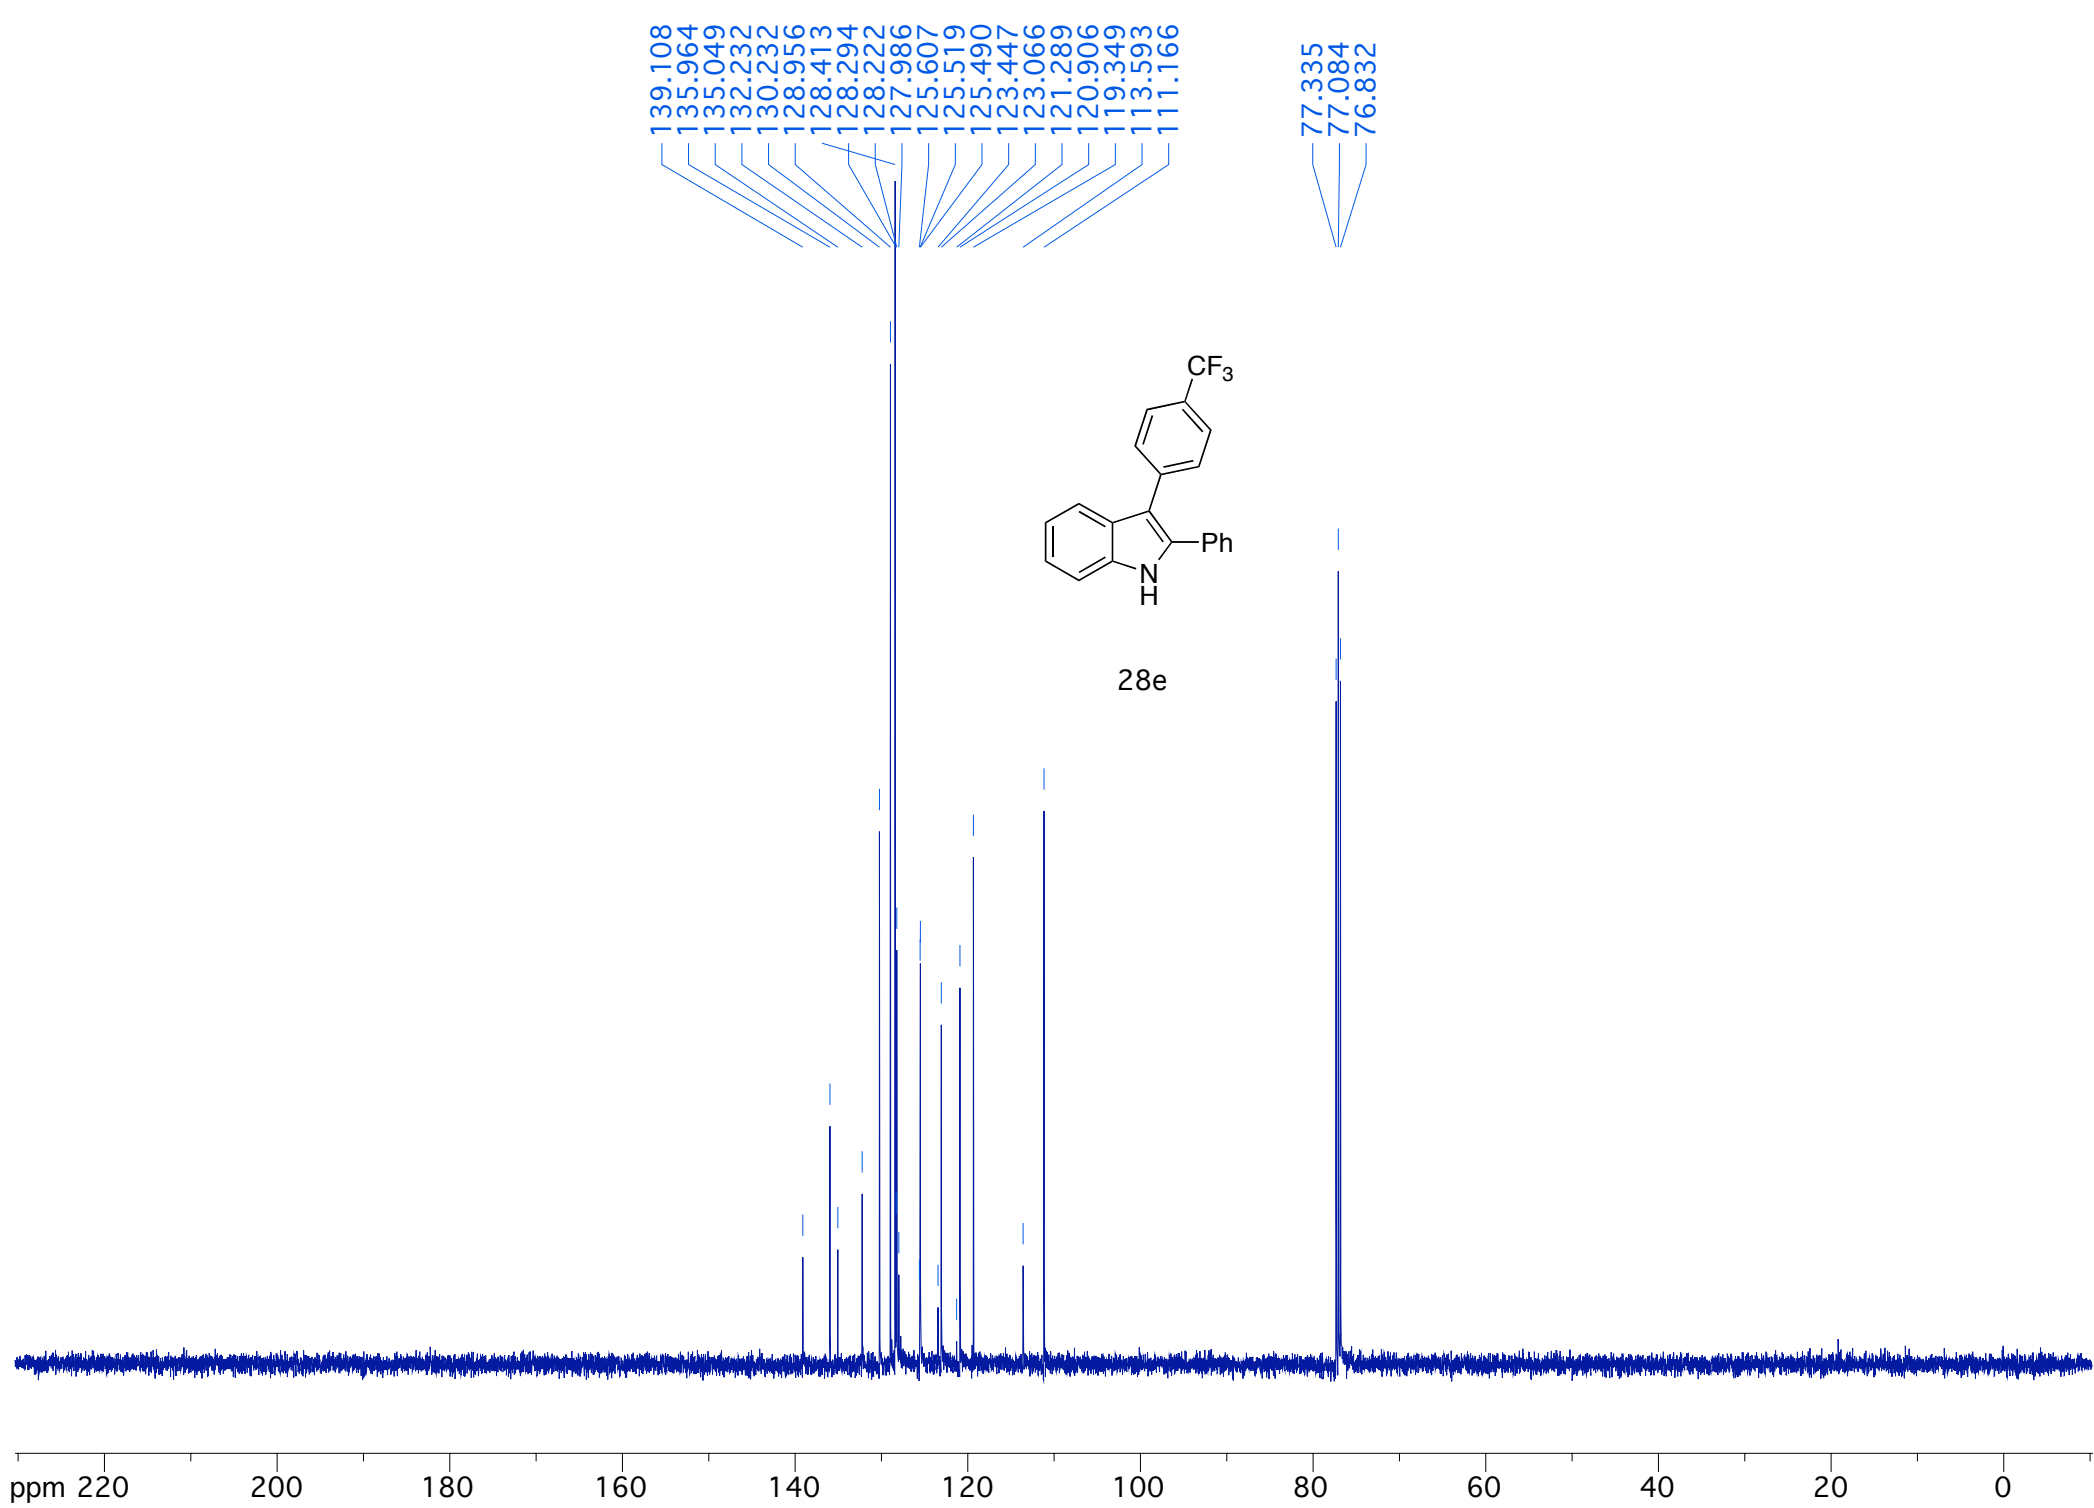



6.961  
6.944  
6.884  
6.866

3.864  
3.824

### Intramolecular Competition Experiment

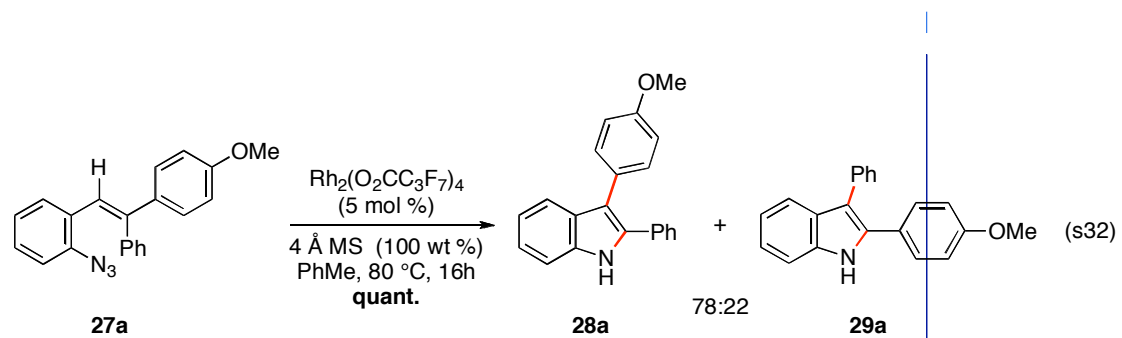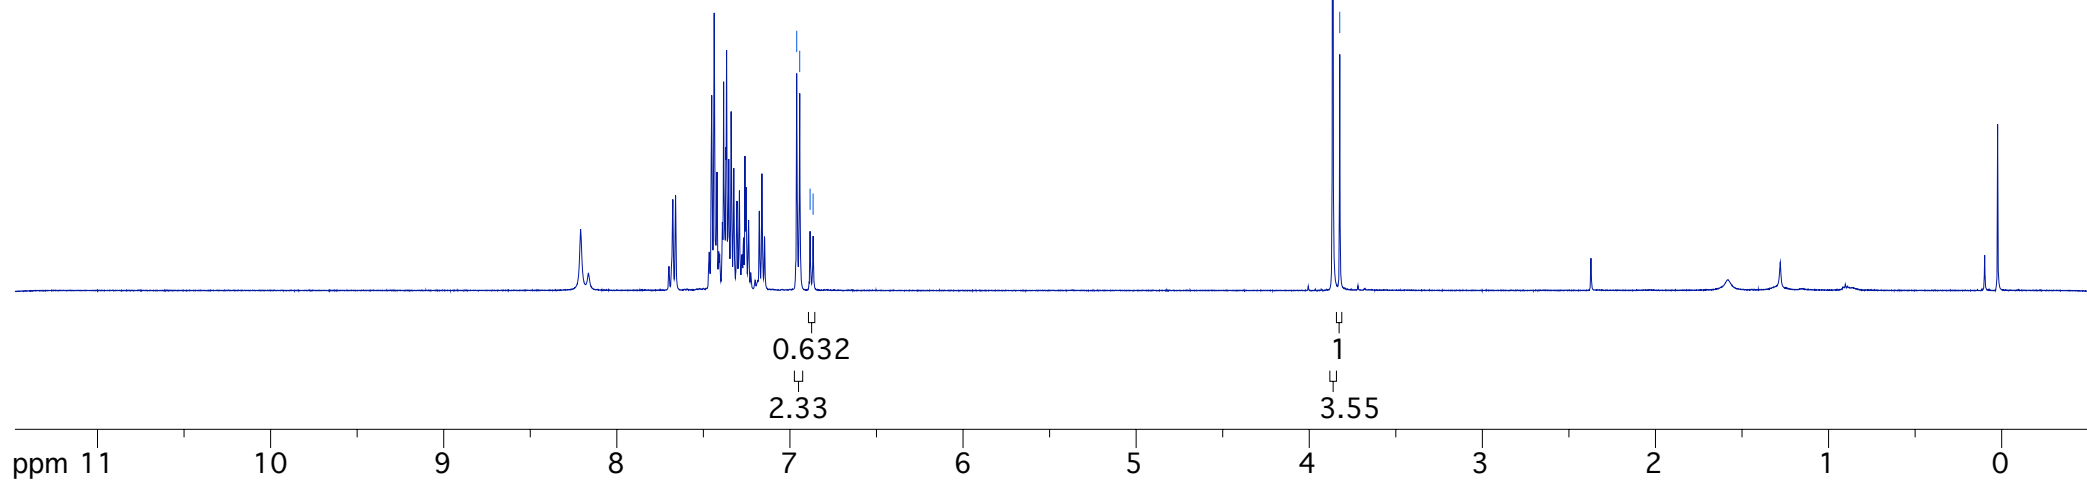

8.166  
8.145  
7.819  
7.803  
7.770  
7.754  
7.563  
7.549  
7.548  
7.508  
7.505  
7.492  
7.490  
7.484  
7.473  
7.453  
7.436  
7.415  
7.401  
7.397  
7.393  
7.384  
7.379  
7.369  
7.363  
7.360  
7.349  
7.345  
7.329  
7.313  
7.297  
7.271  
7.260  
7.259  
7.248  
7.234  
7.219

### Intramolecular Competition Experiment

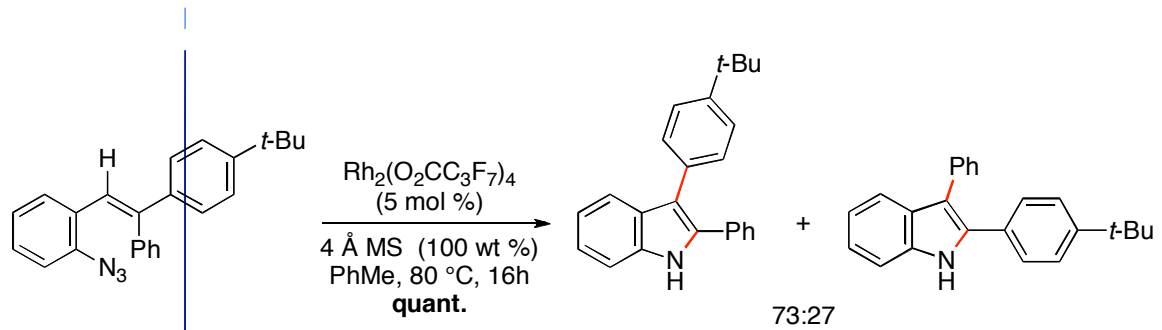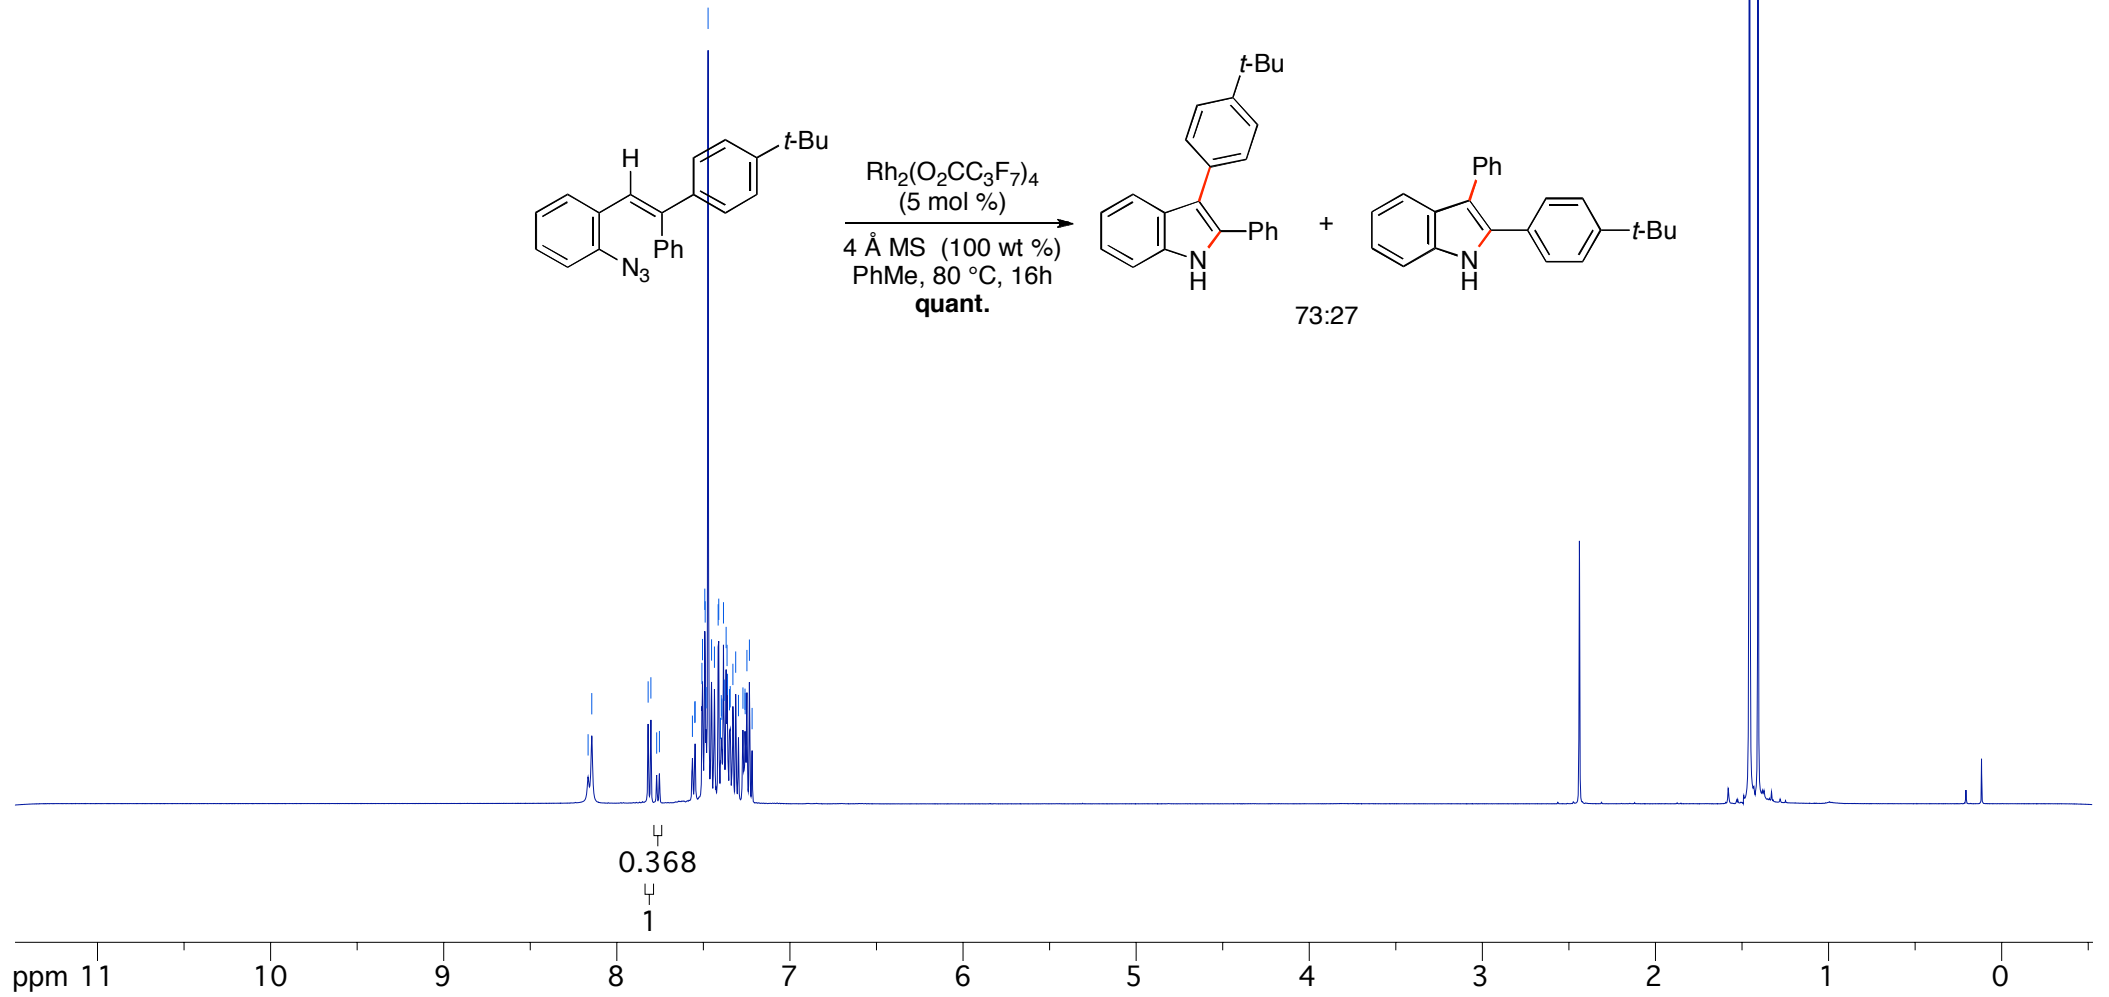

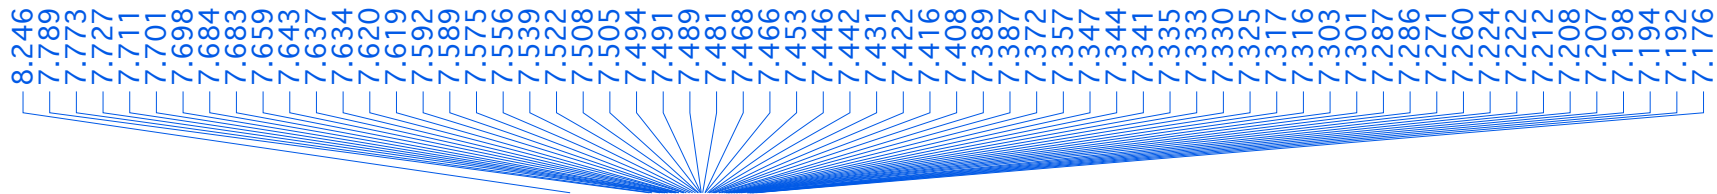

### Intramolecular Competition Experiment

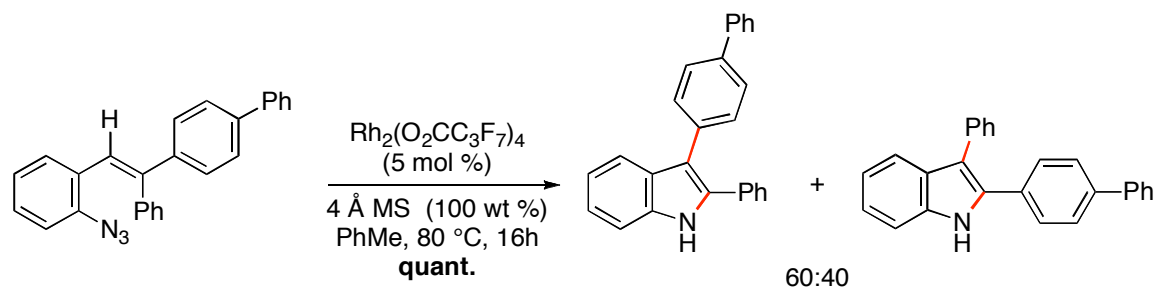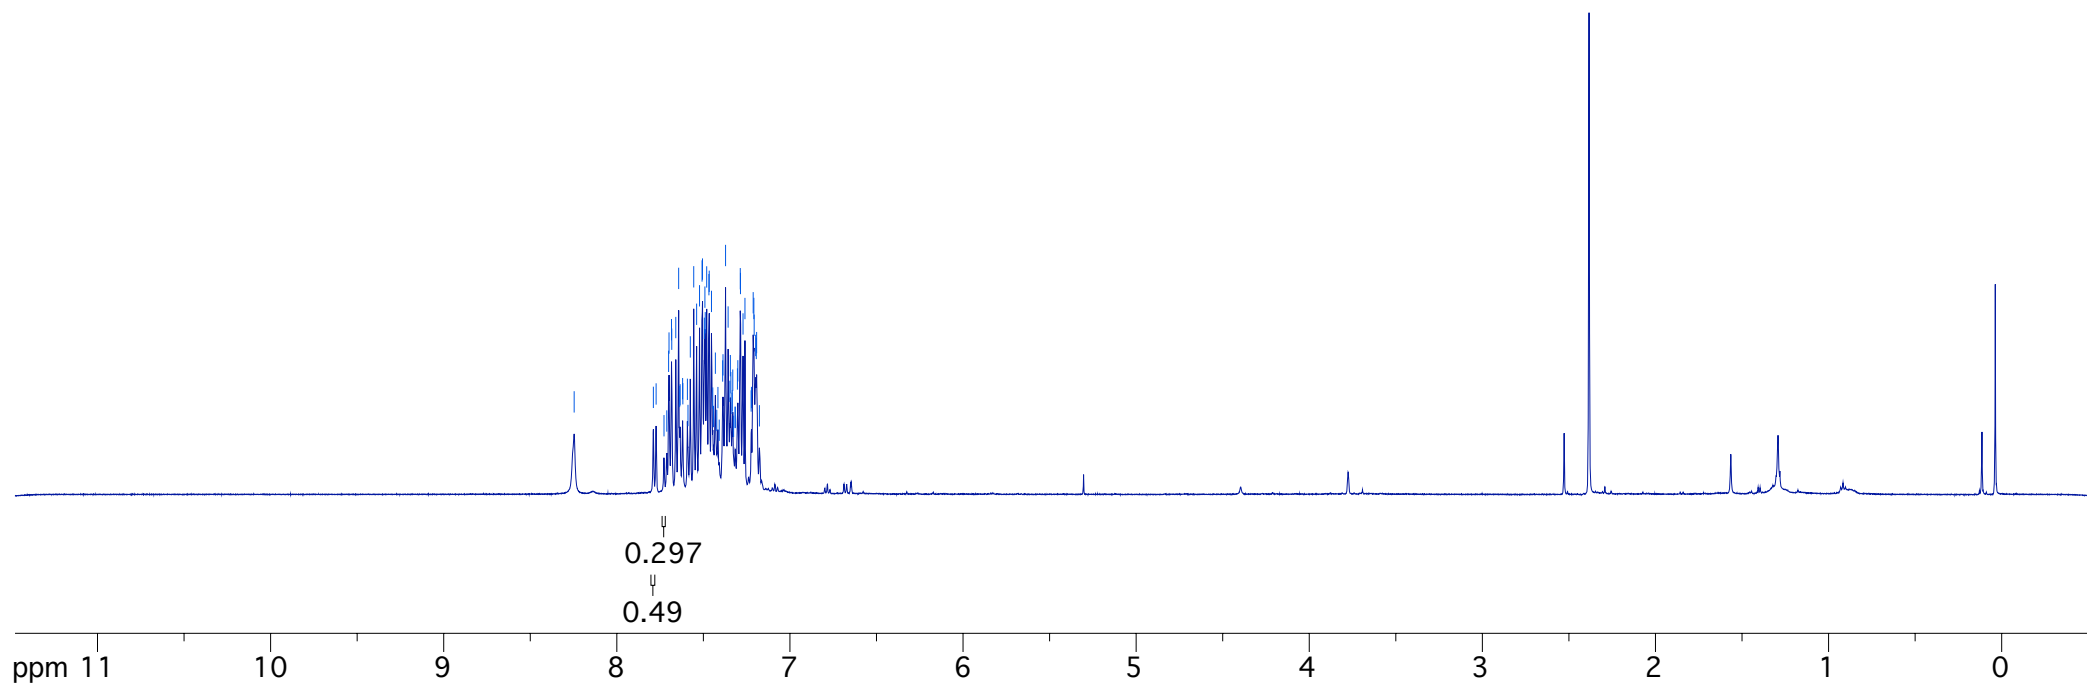

8.207  
8.132  
7.733  
7.718  
7.459  
7.457  
7.451  
7.444  
7.437  
7.430  
7.428  
7.422  
7.421  
7.402  
7.394  
7.370  
7.365  
7.361  
7.356  
7.352  
7.348  
7.324  
7.321  
7.320  
7.314  
7.307  
7.305  
7.299  
7.240  
7.227  
7.222  
7.218  
7.216  
7.215  
7.213  
7.199  
7.197  
7.188  
7.186  
6.670  
6.666

### Intramolecular Competition Experiment

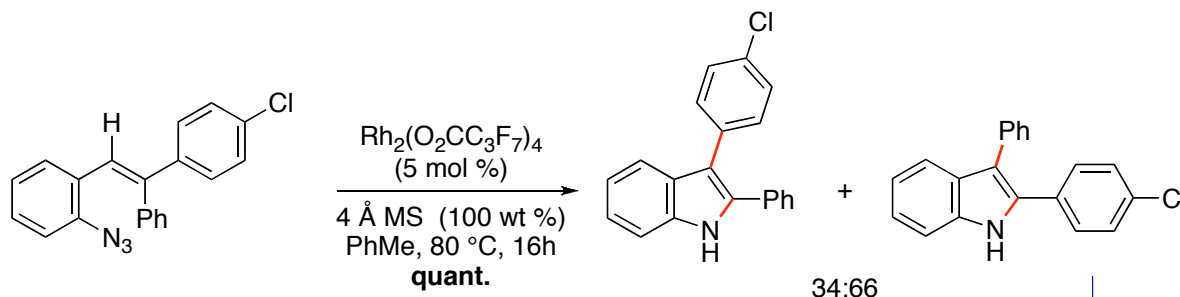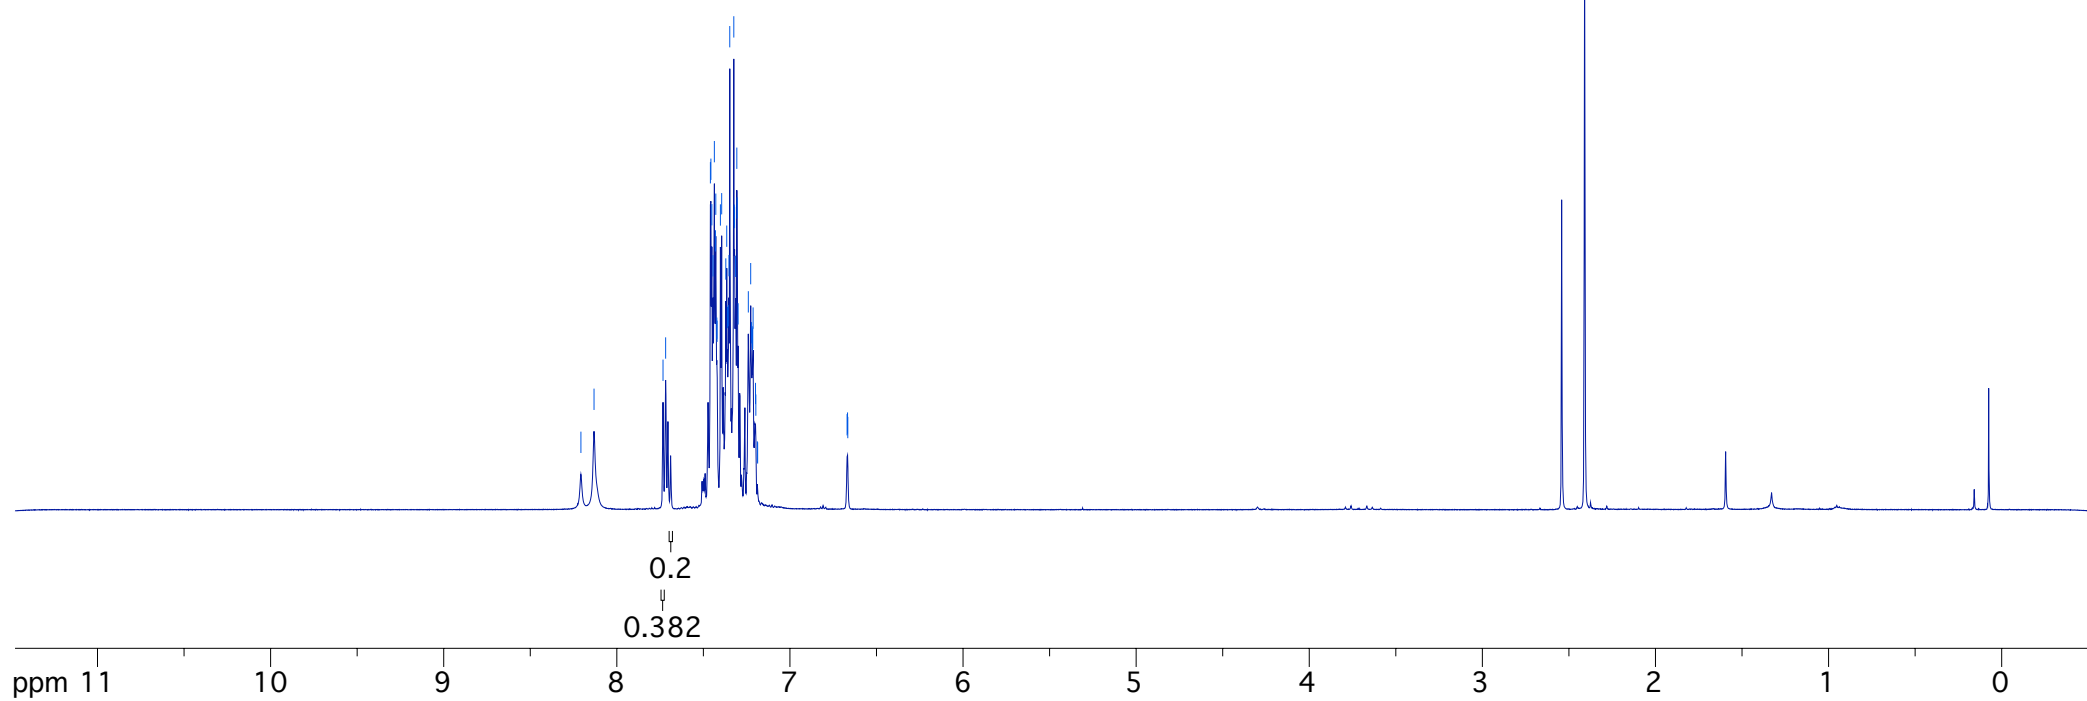

7.699  
7.683  
7.588  
7.571  
7.538  
7.522  
7.470  
7.454  
7.435  
7.431  
7.423  
7.411  
7.366  
7.362  
7.349  
7.303  
7.288  
7.277  
7.260  
7.207  
7.193  
7.179

### Intramolecular Competition Experiment

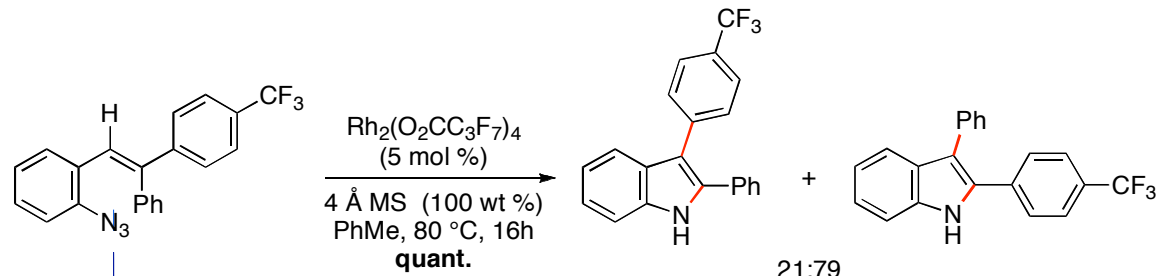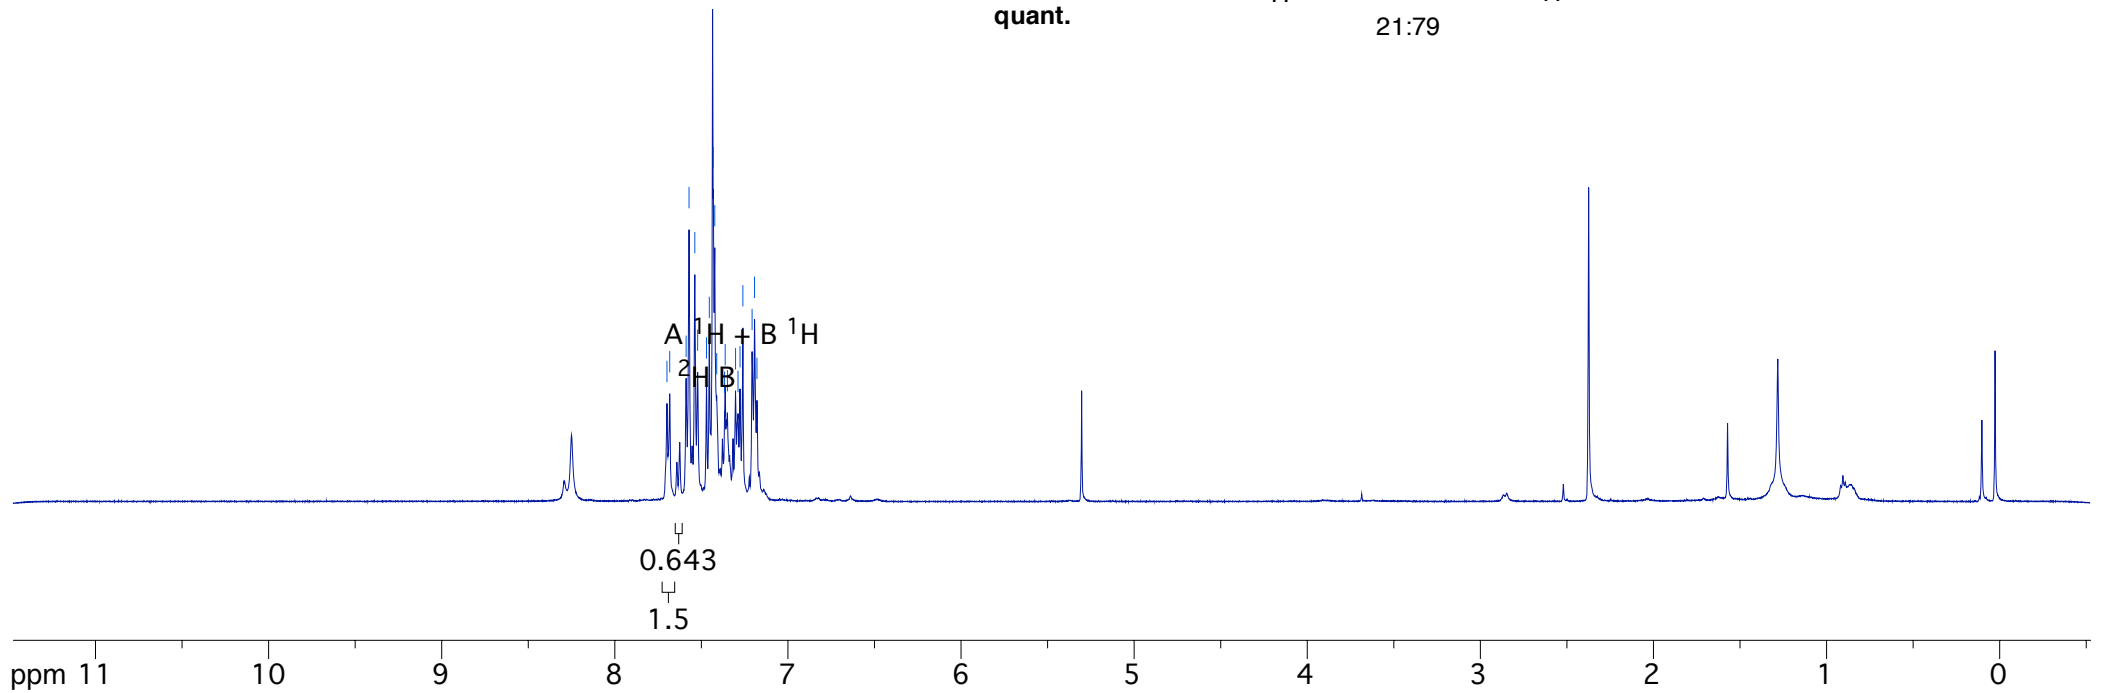

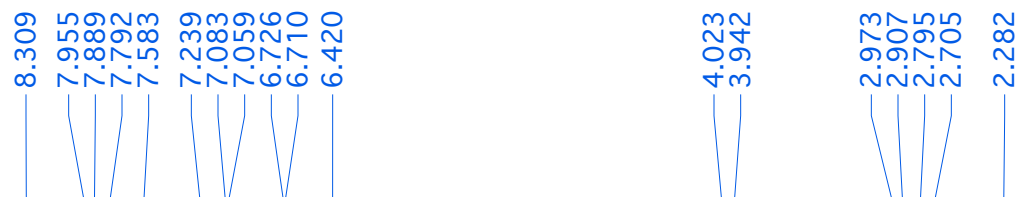

## Intermolecular Competition Experiment

5 vs 8a

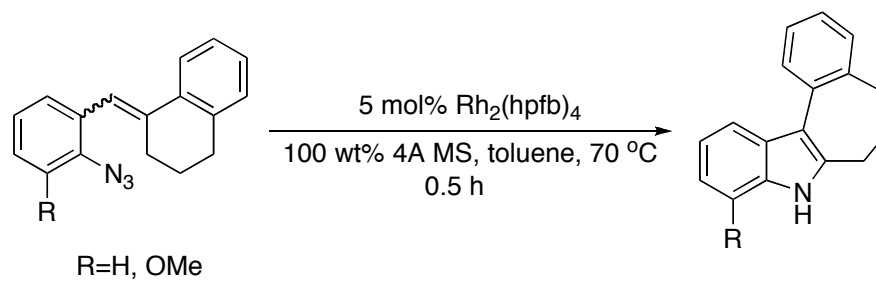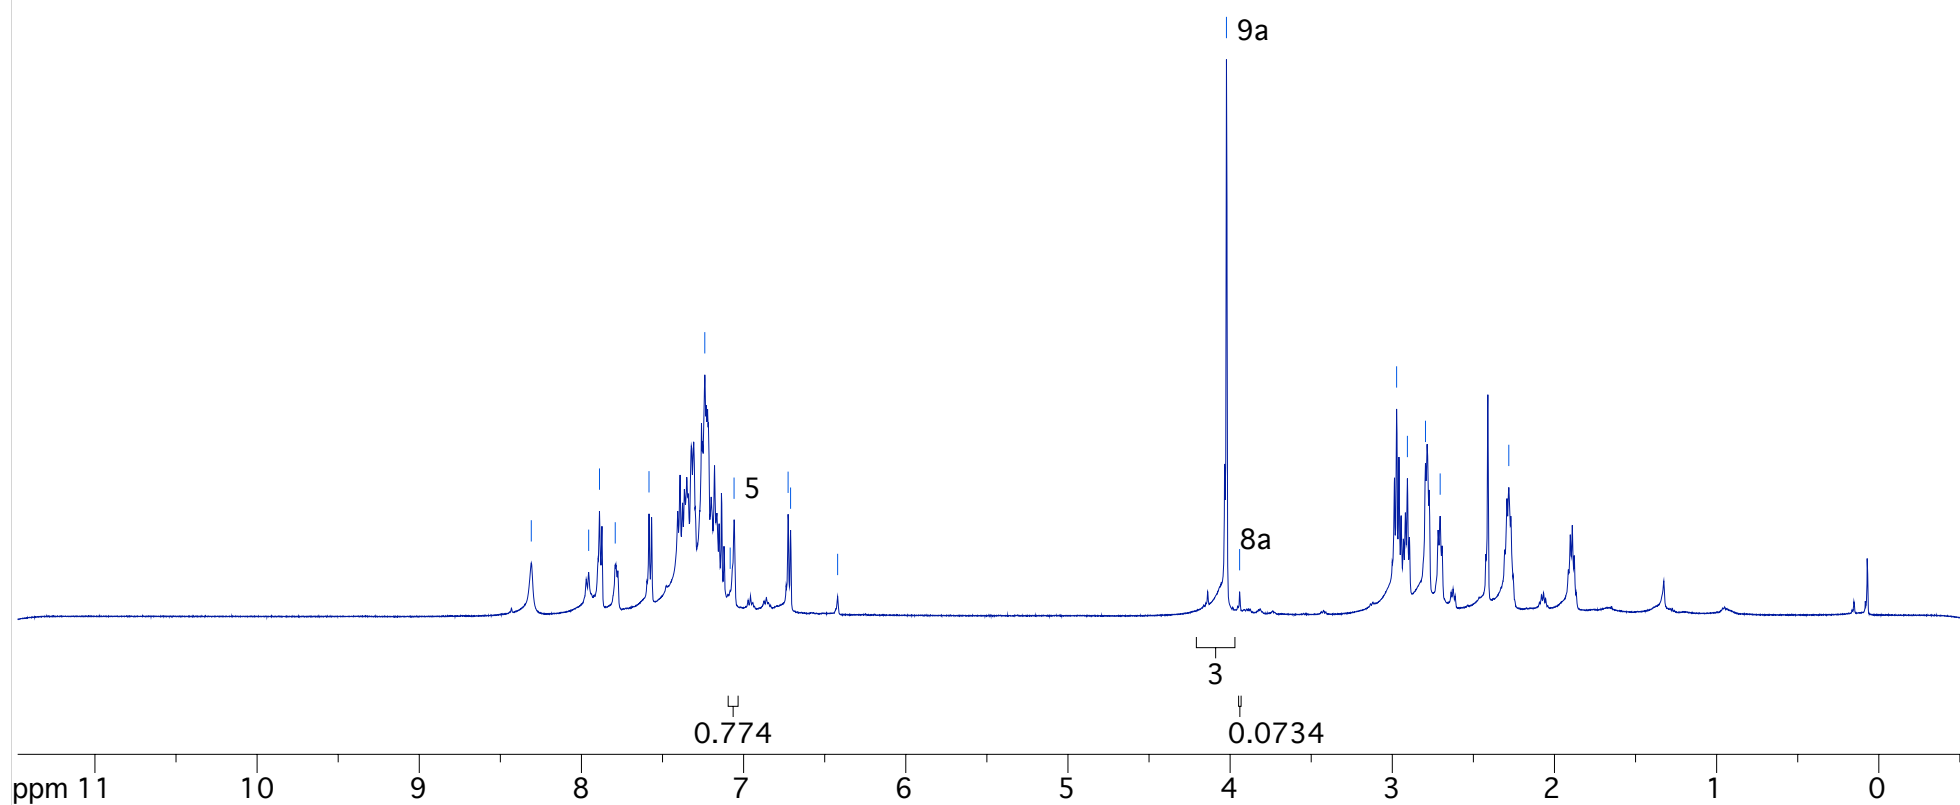

## Examination of Rates of Reaction of E- and Z-Isomers

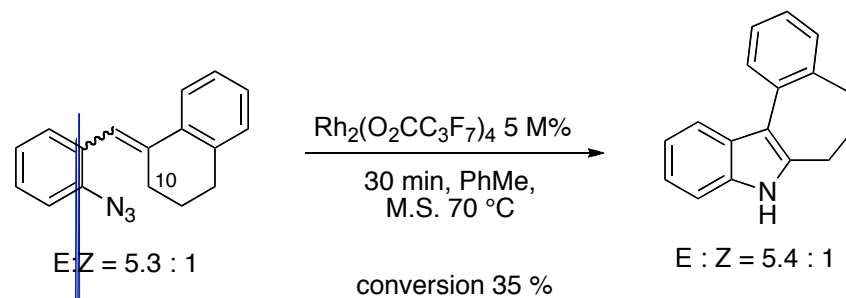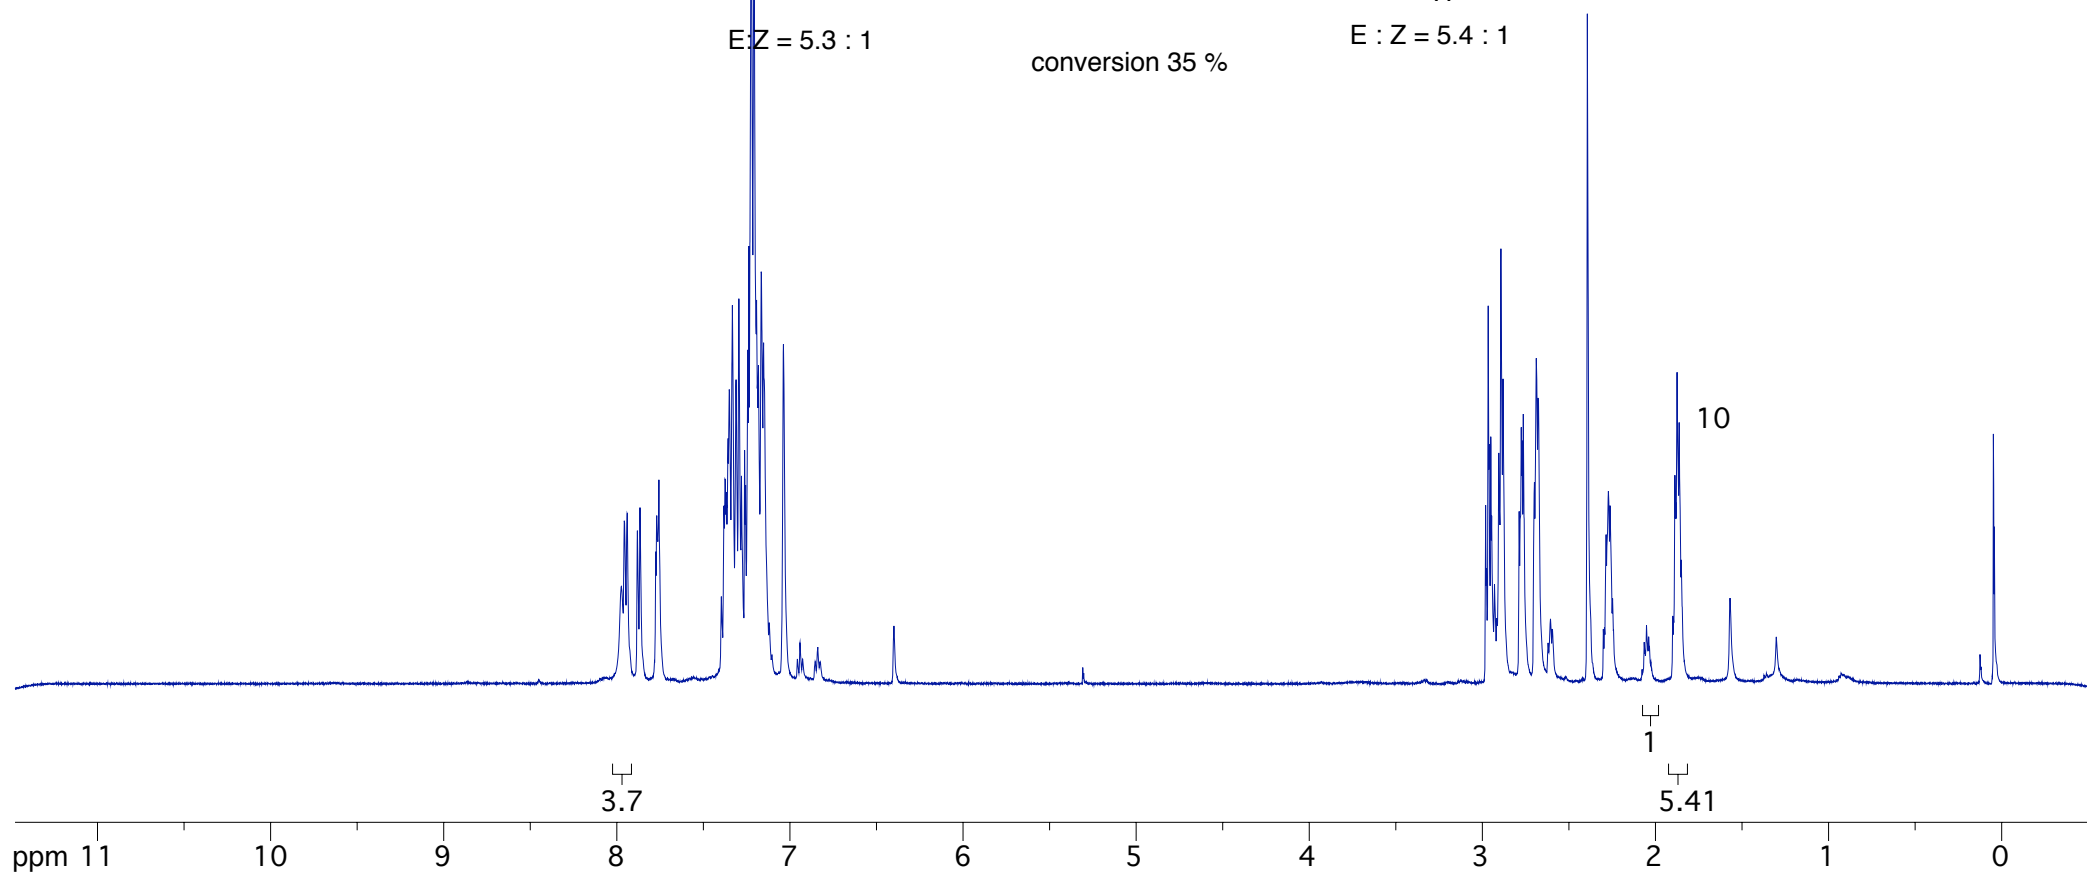

Supplement: NIHMS287441-supplement-SI.pdf [file NIHMS287441-supplement-SI.pdf]
